# Supplementary material for: Global regulatory features of alternative splicing across tissues and within the nervous system of C. elegans
Source: Genome Res. 2020 Dec;30(12):1766–80. doi: 10.1101/gr.267328.120 (PMC7706725; doi:10.1101/gr.267328.120)
Supplement: Supplemental Material [file supp_gr.267328.120_Supplemental_Table_S1.xlsx]

## Sheet: Legend
Supplemental Table S1: Spreadsheet with all splice junctions detected in input and TRAP-seq IP samples with more than five read count support. Each worksheet is presented in BED format for convenient upload to the UCSC genome browser as a custom track. Coordinates match ce11 genome build.

## Sheet: input_all
track name=all_junctions description='all_junctions'
chrI	12759789	12760009	readCounts:6047	950	-	12759789	12760009	0	2	50,50	0,170
chrI	12759974	12760287	readCounts:4320	950	-	12759974	12760287	0	2	50,50	0,263
chrI	12759974	12760894	readCounts:12	950	-	12759974	12760894	0	2	50,50	0,870
chrI	12760268	12760425	readCounts:6	950	-	12760268	12760425	0	2	50,50	0,107
chrI	12760271	12760425	readCounts:13	950	-	12760271	12760425	0	2	50,50	0,104
chrI	12760280	12760425	readCounts:3713	950	-	12760280	12760425	0	2	50,50	0,95
chrI	12760355	12760894	readCounts:22	950	-	12760355	12760894	0	2	50,50	0,489
chrI	12760455	12760894	readCounts:2715	950	-	12760455	12760894	0	2	50,50	0,389
chrI	12760865	12761232	readCounts:1771	950	-	12760865	12761232	0	2	50,50	0,317
chrI	12761477	12761859	readCounts:705	950	-	12761477	12761859	0	2	50,50	0,332
chrI	12761914	12762187	readCounts:553	950	-	12761914	12762187	0	2	50,50	0,223
chrI	12762229	12762708	readCounts:577	950	-	12762229	12762708	0	2	50,50	0,429
chrI	12762767	12763172	readCounts:380	950	-	12762767	12763172	0	2	50,50	0,355
chrI	12763210	12763508	readCounts:335	950	-	12763210	12763508	0	2	50,50	0,248
chrI	12763616	12763789	readCounts:227	950	-	12763616	12763789	0	2	50,50	0,123
chrI	12763843	12764039	readCounts:163	950	-	12763843	12764039	0	2	50,50	0,146
chrI	12764063	12764351	readCounts:168	950	-	12764063	12764351	0	2	50,50	0,238
chrI	12764432	12764872	readCounts:110	950	-	12764432	12764872	0	2	50,50	0,390
chrI	12773704	12774159	readCounts:148	950	+	12773704	12774159	0	2	50,50	0,405
chrI	12774288	12774830	readCounts:407	950	+	12774288	12774830	0	2	50,50	0,492
chrI	12775144	12775806	readCounts:911	950	+	12775144	12775806	0	2	50,50	0,612
chrI	12775817	12776453	readCounts:743	950	+	12775817	12776453	0	2	50,50	0,586
chrI	12775822	12776453	readCounts:47	950	+	12775822	12776453	0	2	50,50	0,581
chrI	12776689	12777367	readCounts:1287	950	+	12776689	12777367	0	2	50,50	0,628
chrI	12777378	12779151	readCounts:1454	950	+	12777378	12779151	0	2	50,50	0,1723
chrI	12779171	12779334	readCounts:2352	950	+	12779171	12779334	0	2	50,50	0,113
chrI	12779331	12780100	readCounts:18	950	+	12779331	12780100	0	2	50,50	0,719
chrI	12779399	12780100	readCounts:2765	950	+	12779399	12780100	0	2	50,50	0,651
chrI	12780069	12780297	readCounts:4076	950	+	12780069	12780297	0	2	50,50	0,178
chrI	12780404	12781270	readCounts:13	950	+	12780404	12781270	0	2	50,50	0,816
chrI	12780404	12781277	readCounts:6276	950	+	12780404	12781277	0	2	50,50	0,823
chrI	12780404	12781586	readCounts:56	950	+	12780404	12781586	0	2	50,50	0,1132
chrI	12781234	12781586	readCounts:6836	950	+	12781234	12781586	0	2	50,50	0,302
chrI	12781757	12782154	readCounts:16	950	+	12781757	12782154	0	2	50,50	0,347
chrI	12781763	12782154	readCounts:5985	950	+	12781763	12782154	0	2	50,50	0,341
chrI	12781796	12782154	readCounts:11	950	+	12781796	12782154	0	2	50,50	0,308
chrI	12775765	12776441	readCounts:354	950	-	12775765	12776441	0	2	50,50	0,626
chrI	12775772	12776441	readCounts:39	950	-	12775772	12776441	0	2	50,50	0,619
chrI	6028599	6029208	readCounts:256	950	+	6028599	6029208	0	2	50,50	0,559
chrI	6030605	6031108	readCounts:3199	950	+	6030605	6031108	0	2	50,50	0,453
chrI	6030605	6032236	readCounts:7	950	+	6030605	6032236	0	2	50,50	0,1581
chrI	6031594	6032236	readCounts:6399	950	+	6031594	6032236	0	2	50,50	0,592
chrI	6032658	6033276	readCounts:21511	950	+	6032658	6033276	0	2	50,50	0,568
chrI	6032678	6033276	readCounts:6	950	+	6032678	6033276	0	2	50,50	0,548
chrI	6033110	6033276	readCounts:14	950	+	6033110	6033276	0	2	50,50	0,116
chrI	6022674	6023034	readCounts:6695	950	+	6022674	6023034	0	2	50,50	0,310
chrI	6023190	6023654	readCounts:5959	950	+	6023190	6023654	0	2	50,50	0,414
chrI	6023968	6025266	readCounts:5	950	+	6023968	6025266	0	2	50,50	0,1248
chrI	6023971	6025266	readCounts:13300	950	+	6023971	6025266	0	2	50,50	0,1245
chrI	6025112	6025266	readCounts:45	950	+	6025112	6025266	0	2	50,50	0,104
chrI	6025452	6025848	readCounts:21723	950	+	6025452	6025848	0	2	50,50	0,346
chrI	6025452	6025854	readCounts:10	950	+	6025452	6025854	0	2	50,50	0,352
chrI	6026049	6026620	readCounts:38418	950	+	6026049	6026620	0	2	50,50	0,521
chrI	6026049	6026651	readCounts:5	950	+	6026049	6026651	0	2	50,50	0,552
chrI	6027370	6027518	readCounts:6	950	+	6027370	6027518	0	2	50,50	0,98
chrI	6027542	6028234	readCounts:11013	950	+	6027542	6028234	0	2	50,50	0,642
chrI	6024217	6024377	readCounts:5	950	-	6024217	6024377	0	2	50,50	0,110
chrI	6024217	6024383	readCounts:38808	950	-	6024217	6024383	0	2	50,50	0,116
chrI	6024217	6024885	readCounts:9	950	-	6024217	6024885	0	2	50,50	0,618
chrI	6024344	6024885	readCounts:7	950	-	6024344	6024885	0	2	50,50	0,491
chrI	6024365	6024885	readCounts:12	950	-	6024365	6024885	0	2	50,50	0,470
chrI	6024369	6024885	readCounts:63331	950	-	6024369	6024885	0	2	50,50	0,466
chrI	6024380	6024885	readCounts:26	950	-	6024380	6024885	0	2	50,50	0,455
chrI	6024729	6024885	readCounts:7	950	-	6024729	6024885	0	2	50,50	0,106
chrI	4664534	4664678	readCounts:4325	950	+	4664534	4664678	0	2	50,50	0,94
chrI	4664732	4664869	readCounts:18	950	+	4664732	4664869	0	2	50,50	0,87
chrI	4664732	4664884	readCounts:5362	950	+	4664732	4664884	0	2	50,50	0,102
chrI	4664736	4664884	readCounts:49	950	+	4664736	4664884	0	2	50,50	0,98
chrI	4664935	4665102	readCounts:6	950	+	4664935	4665102	0	2	50,50	0,117
chrI	4664958	4665102	readCounts:3791	950	+	4664958	4665102	0	2	50,50	0,94
chrI	4665103	4665248	readCounts:3039	950	+	4665103	4665248	0	2	50,50	0,95
chrI	4661104	4661255	readCounts:1871	950	-	4661104	4661255	0	2	50,50	0,101
chrI	4661332	4661812	readCounts:2406	950	-	4661332	4661812	0	2	50,50	0,430
chrI	4661346	4661812	readCounts:108	950	-	4661346	4661812	0	2	50,50	0,416
chrI	4661906	4662052	readCounts:2448	950	-	4661906	4662052	0	2	50,50	0,96
chrI	4662029	4662180	readCounts:2616	950	-	4662029	4662180	0	2	50,50	0,101
chrI	4653492	4653647	readCounts:537	950	+	4653492	4653647	0	2	50,50	0,105
chrI	4653636	4653825	readCounts:5	950	+	4653636	4653825	0	2	50,50	0,139
chrI	4653636	4655398	readCounts:495	950	+	4653636	4655398	0	2	50,50	0,1712
chrI	4653926	4655398	readCounts:16	950	+	4653926	4655398	0	2	50,50	0,1422
chrI	4655446	4655770	readCounts:3278	950	+	4655446	4655770	0	2	50,50	0,274
chrI	4656147	4656361	readCounts:18	950	+	4656147	4656361	0	2	50,50	0,164
chrI	4656408	4656560	readCounts:4892	950	+	4656408	4656560	0	2	50,50	0,102
chrI	4656730	4657255	readCounts:763	950	+	4656730	4657255	0	2	50,50	0,475
chrI	4656730	4657261	readCounts:2792	950	+	4656730	4657261	0	2	50,50	0,481
chrI	4657377	4657988	readCounts:541	950	+	4657377	4657988	0	2	50,50	0,561
chrI	4657383	4657988	readCounts:53	950	+	4657383	4657988	0	2	50,50	0,555
chrI	4657437	4657988	readCounts:9294	950	+	4657437	4657988	0	2	50,50	0,501
chrI	4658205	4658734	readCounts:9809	950	+	4658205	4658734	0	2	50,50	0,479
chrI	4658712	4659058	readCounts:15535	950	+	4658712	4659058	0	2	50,50	0,296
chrI	4659181	4659320	readCounts:180	950	+	4659181	4659320	0	2	50,50	0,89
chrI	4644713	4645234	readCounts:3621	950	+	4644713	4645234	0	2	50,50	0,471
chrI	4645254	4645402	readCounts:3540	950	+	4645254	4645402	0	2	50,50	0,98
chrI	4645785	4645924	readCounts:100	950	-	4645785	4645924	0	2	50,50	0,89
chrI	4645785	4645933	readCounts:395	950	-	4645785	4645933	0	2	50,50	0,98
chrI	4645785	4646405	readCounts:365	950	-	4645785	4646405	0	2	50,50	0,570
chrI	4645866	4646158	readCounts:2498	950	-	4645866	4646158	0	2	50,50	0,242
chrI	4645899	4646134	readCounts:15	950	-	4645899	4646134	0	2	50,50	0,185
chrI	4645950	4646134	readCounts:11	950	-	4645950	4646134	0	2	50,50	0,134
chrI	4645950	4646149	readCounts:5	950	-	4645950	4646149	0	2	50,50	0,149
chrI	4645997	4646203	readCounts:26	950	-	4645997	4646203	0	2	50,50	0,156
chrI	4646148	4646330	readCounts:970	950	-	4646148	4646330	0	2	50,50	0,132
chrI	4646148	4646405	readCounts:1315	950	-	4646148	4646405	0	2	50,50	0,207
chrI	4646164	4646681	readCounts:398	950	-	4646164	4646681	0	2	50,50	0,467
chrI	4646181	4646330	readCounts:801777	950	-	4646181	4646330	0	2	50,50	0,99
chrI	4646181	4646420	readCounts:67	950	-	4646181	4646420	0	2	50,50	0,189
chrI	4646188	4646330	readCounts:40	950	-	4646188	4646330	0	2	50,50	0,92
chrI	4646281	4646405	readCounts:2641	950	-	4646281	4646405	0	2	50,50	0,74
chrI	4646338	4646486	readCounts:174	950	-	4646338	4646486	0	2	50,50	0,98
chrI	4646338	4646490	readCounts:791825	950	-	4646338	4646490	0	2	50,50	0,102
chrI	4646510	4646696	readCounts:419	950	-	4646510	4646696	0	2	50,50	0,136
chrI	4646533	4646962	readCounts:98	950	-	4646533	4646962	0	2	50,50	0,379
chrI	4646653	4646835	readCounts:518593	950	-	4646653	4646835	0	2	50,50	0,132
chrI	4648565	4648714	readCounts:44	950	-	4648565	4648714	0	2	50,50	0,99
chrI	4648570	4648714	readCounts:6	950	-	4648570	4648714	0	2	50,50	0,94
chrI	4648691	4648847	readCounts:13581	950	-	4648691	4648847	0	2	50,50	0,106
chrI	4648691	4649660	readCounts:27	950	-	4648691	4649660	0	2	50,50	0,919
chrI	4649051	4649228	readCounts:8343	950	-	4649051	4649228	0	2	50,50	0,127
chrI	4649051	4649660	readCounts:289	950	-	4649051	4649660	0	2	50,50	0,559
chrI	4649275	4649660	readCounts:7081	950	-	4649275	4649660	0	2	50,50	0,335
chrI	4649692	4650298	readCounts:4959	950	-	4649692	4650298	0	2	50,50	0,556
chrI	4650492	4650641	readCounts:3509	950	-	4650492	4650641	0	2	50,50	0,99
chrI	4652273	4652619	readCounts:15914	950	-	4652273	4652619	0	2	50,50	0,296
chrI	4652519	4652661	readCounts:9	950	-	4652519	4652661	0	2	50,50	0,92
chrI	4652651	4652803	readCounts:13843	950	-	4652651	4652803	0	2	50,50	0,102
chrI	4666245	4666450	readCounts:15953	950	-	4666245	4666450	0	2	50,50	0,155
chrI	4667149	4667767	readCounts:4168	950	-	4667149	4667767	0	2	50,50	0,568
chrI	4667901	4668061	readCounts:2617	950	-	4667901	4668061	0	2	50,50	0,110
chrI	4668659	4669276	readCounts:447	950	-	4668659	4669276	0	2	50,50	0,567
chrI	4669352	4669510	readCounts:491	950	-	4669352	4669510	0	2	50,50	0,108
chrI	4669689	4669841	readCounts:318	950	-	4669689	4669841	0	2	50,50	0,102
chrI	4670742	4670907	readCounts:966	950	-	4670742	4670907	0	2	50,50	0,115
chrI	4671374	4671528	readCounts:688	950	-	4671374	4671528	0	2	50,50	0,104
chrI	4671569	4671729	readCounts:392	950	-	4671569	4671729	0	2	50,50	0,110
chrI	4647515	4647662	readCounts:12187	950	+	4647515	4647662	0	2	50,50	0,97
chrI	4647515	4647710	readCounts:5	950	+	4647515	4647710	0	2	50,50	0,145
chrI	4647515	4647770	readCounts:25	950	+	4647515	4647770	0	2	50,50	0,205
chrI	4647831	4647980	readCounts:17858	950	+	4647831	4647980	0	2	50,50	0,99
chrI	10713789	10713940	readCounts:9203	950	-	10713789	10713940	0	2	50,50	0,101
chrI	10714053	10714198	readCounts:7	950	-	10714053	10714198	0	2	50,50	0,95
chrI	10714053	10714201	readCounts:8980	950	-	10714053	10714201	0	2	50,50	0,98
chrI	10714642	10714792	readCounts:2609	950	-	10714642	10714792	0	2	50,50	0,100
chrI	10714806	10715038	readCounts:1811	950	-	10714806	10715038	0	2	50,50	0,182
chrI	10715181	10715451	readCounts:1180	950	-	10715181	10715451	0	2	50,50	0,220
chrI	10715465	10715610	readCounts:817	950	-	10715465	10715610	0	2	50,50	0,95
chrI	10715741	10716289	readCounts:454	950	-	10715741	10716289	0	2	50,50	0,498
chrI	10715741	10716312	readCounts:12	950	-	10715741	10716312	0	2	50,50	0,521
chrI	10716303	10716448	readCounts:445	950	-	10716303	10716448	0	2	50,50	0,95
chrI	10716579	10716725	readCounts:398	950	-	10716579	10716725	0	2	50,50	0,96
chrI	10716739	10716891	readCounts:208	950	-	10716739	10716891	0	2	50,50	0,102
chrI	10716945	10717764	readCounts:76	950	-	10716945	10717764	0	2	50,50	0,769
chrI	10717692	10717849	readCounts:230	950	-	10717692	10717849	0	2	50,50	0,107
chrI	10717863	10718183	readCounts:295	950	-	10717863	10718183	0	2	50,50	0,270
chrI	10708376	10708850	readCounts:1360	950	+	10708376	10708850	0	2	50,50	0,424
chrI	10709499	10709668	readCounts:13	950	+	10709499	10709668	0	2	50,50	0,119
chrI	10709593	10709741	readCounts:33443	950	+	10709593	10709741	0	2	50,50	0,98
chrI	10709940	10710085	readCounts:69	950	+	10709940	10710085	0	2	50,50	0,95
chrI	10710087	10710230	readCounts:30038	950	+	10710087	10710230	0	2	50,50	0,93
chrI	10710191	10710337	readCounts:23685	950	+	10710191	10710337	0	2	50,50	0,96
chrI	10732743	10732890	readCounts:36905	950	-	10732743	10732890	0	2	50,50	0,97
chrI	10733114	10733262	readCounts:24788	950	-	10733114	10733262	0	2	50,50	0,98
chrI	10733114	10733284	readCounts:9	950	-	10733114	10733284	0	2	50,50	0,120
chrI	10733287	10733437	readCounts:23784	950	-	10733287	10733437	0	2	50,50	0,100
chrI	10733503	10733648	readCounts:15148	950	-	10733503	10733648	0	2	50,50	0,95
chrI	10730499	10730649	readCounts:27602	950	+	10730499	10730649	0	2	50,50	0,100
chrI	10727996	10728697	readCounts:14319	950	-	10727996	10728697	0	2	50,50	0,651
chrI	10726942	10727226	readCounts:5346	950	+	10726942	10727226	0	2	50,50	0,234
chrI	10724362	10724846	readCounts:51	950	-	10724362	10724846	0	2	50,50	0,434
chrI	10724911	10725053	readCounts:59	950	-	10724911	10725053	0	2	50,50	0,92
chrI	10725251	10725401	readCounts:50	950	-	10725251	10725401	0	2	50,50	0,100
chrI	10731249	10731402	readCounts:33253	950	-	10731249	10731402	0	2	50,50	0,103
chrI	10731801	10732223	readCounts:20	950	-	10731801	10732223	0	2	50,50	0,372
chrI	10731804	10732223	readCounts:13314	950	-	10731804	10732223	0	2	50,50	0,369
chrI	10732264	10732415	readCounts:9680	950	-	10732264	10732415	0	2	50,50	0,101
chrI	10741485	10741632	readCounts:2951	950	-	10741485	10741632	0	2	50,50	0,97
chrI	10741666	10741808	readCounts:2611	950	-	10741666	10741808	0	2	50,50	0,92
chrI	10741772	10741926	readCounts:2637	950	-	10741772	10741926	0	2	50,50	0,104
chrI	10741772	10743025	readCounts:8	950	-	10741772	10743025	0	2	50,50	0,1203
chrI	10741778	10741926	readCounts:89	950	-	10741778	10741926	0	2	50,50	0,98
chrI	10741975	10743025	readCounts:2408	950	-	10741975	10743025	0	2	50,50	0,1000
chrI	10743037	10743201	readCounts:30	950	-	10743037	10743201	0	2	50,50	0,114
chrI	10743037	10743282	readCounts:16	950	-	10743037	10743282	0	2	50,50	0,195
chrI	10743037	10743390	readCounts:1517	950	-	10743037	10743390	0	2	50,50	0,303
chrI	10743204	10743390	readCounts:15	950	-	10743204	10743390	0	2	50,50	0,136
chrI	10743449	10743594	readCounts:1426	950	-	10743449	10743594	0	2	50,50	0,95
chrI	10743697	10743838	readCounts:915	950	-	10743697	10743838	0	2	50,50	0,91
chrI	10743864	10744179	readCounts:674	950	-	10743864	10744179	0	2	50,50	0,265
chrI	10744217	10744383	readCounts:470	950	-	10744217	10744383	0	2	50,50	0,116
chrI	10736767	10737372	readCounts:4083	950	+	10736767	10737372	0	2	50,50	0,555
chrI	10737410	10737554	readCounts:6069	950	+	10737410	10737554	0	2	50,50	0,94
chrI	10737574	10737846	readCounts:7647	950	+	10737574	10737846	0	2	50,50	0,222
chrI	10737845	10737990	readCounts:8784	950	+	10737845	10737990	0	2	50,50	0,95
chrI	10737984	10738236	readCounts:10893	950	+	10737984	10738236	0	2	50,50	0,202
chrI	10737984	10738275	readCounts:9	950	+	10737984	10738275	0	2	50,50	0,241
chrI	10738271	10738408	readCounts:36	950	+	10738271	10738408	0	2	50,50	0,87
chrI	10738271	10738421	readCounts:15253	950	+	10738271	10738421	0	2	50,50	0,100
chrI	10738477	10739037	readCounts:27941	950	+	10738477	10739037	0	2	50,50	0,510
chrI	10738477	10739487	readCounts:55	950	+	10738477	10739487	0	2	50,50	0,960
chrI	10739078	10739487	readCounts:26889	950	+	10739078	10739487	0	2	50,50	0,359
chrI	10739078	10739536	readCounts:281	950	+	10739078	10739536	0	2	50,50	0,408
chrI	10739554	10739704	readCounts:33882	950	+	10739554	10739704	0	2	50,50	0,100
chrI	10734027	10734370	readCounts:13890	950	+	10734027	10734370	0	2	50,50	0,293
chrI	10734441	10734600	readCounts:33734	950	+	10734441	10734600	0	2	50,50	0,109
chrI	10734628	10734777	readCounts:31281	950	+	10734628	10734777	0	2	50,50	0,99
chrI	10734632	10734777	readCounts:25	950	+	10734632	10734777	0	2	50,50	0,95
chrI	10734762	10734921	readCounts:32491	950	+	10734762	10734921	0	2	50,50	0,109
chrI	10735118	10735675	readCounts:66603	950	+	10735118	10735675	0	2	50,50	0,507
chrI	10735118	10735679	readCounts:81	950	+	10735118	10735679	0	2	50,50	0,511
chrI	10735700	10735855	readCounts:76866	950	+	10735700	10735855	0	2	50,50	0,105
chrI	10735837	10736134	readCounts:71020	950	+	10735837	10736134	0	2	50,50	0,247
chrI	10729000	10729824	readCounts:20490	950	-	10729000	10729824	0	2	50,50	0,774
chrI	10729754	10729908	readCounts:663	950	-	10729754	10729908	0	2	50,50	0,104
chrI	10729754	10729932	readCounts:151	950	-	10729754	10729932	0	2	50,50	0,128
chrI	10729918	10730066	readCounts:43484	950	-	10729918	10730066	0	2	50,50	0,98
chrI	10730058	10730217	readCounts:36776	950	-	10730058	10730217	0	2	50,50	0,109
chrI	10720924	10721070	readCounts:463	950	+	10720924	10721070	0	2	50,50	0,96
chrI	10721084	10721243	readCounts:493	950	+	10721084	10721243	0	2	50,50	0,109
chrI	10721365	10722068	readCounts:680	950	+	10721365	10722068	0	2	50,50	0,653
chrI	10722082	10722232	readCounts:1260	950	+	10722082	10722232	0	2	50,50	0,100
chrI	10722859	10723004	readCounts:6879	950	+	10722859	10723004	0	2	50,50	0,95
chrI	10722859	10723117	readCounts:17	950	+	10722859	10723117	0	2	50,50	0,208
chrI	10723117	10723265	readCounts:9672	950	+	10723117	10723265	0	2	50,50	0,98
chrI	5965069	5965220	readCounts:105	950	+	5965069	5965220	0	2	50,50	0,101
chrI	5965104	5965331	readCounts:27	950	+	5965104	5965331	0	2	50,50	0,177
chrI	5965181	5965331	readCounts:103	950	+	5965181	5965331	0	2	50,50	0,100
chrI	5965350	5965492	readCounts:1060	950	+	5965350	5965492	0	2	50,50	0,92
chrI	5965811	5965960	readCounts:1267	950	+	5965811	5965960	0	2	50,50	0,99
chrI	5965951	5966098	readCounts:1830	950	+	5965951	5966098	0	2	50,50	0,97
chrI	5966132	5966307	readCounts:2381	950	+	5966132	5966307	0	2	50,50	0,125
chrI	5966132	5966312	readCounts:23	950	+	5966132	5966312	0	2	50,50	0,130
chrI	5966430	5966577	readCounts:3517	950	+	5966430	5966577	0	2	50,50	0,97
chrI	5966635	5966867	readCounts:4472	950	+	5966635	5966867	0	2	50,50	0,182
chrI	5967020	5967167	readCounts:2310	950	+	5967020	5967167	0	2	50,50	0,97
chrI	5959157	5959347	readCounts:14	950	-	5959157	5959347	0	2	50,50	0,140
chrI	5959157	5959506	readCounts:9077	950	-	5959157	5959506	0	2	50,50	0,299
chrI	5963051	5963226	readCounts:4174	950	-	5963051	5963226	0	2	50,50	0,125
chrI	5963412	5963560	readCounts:2857	950	-	5963412	5963560	0	2	50,50	0,98
chrI	5963412	5963565	readCounts:5	950	-	5963412	5963565	0	2	50,50	0,103
chrI	5963535	5963682	readCounts:3836	950	-	5963535	5963682	0	2	50,50	0,97
chrI	5963836	5964113	readCounts:2025	950	-	5963836	5964113	0	2	50,50	0,227
chrI	5963836	5964190	readCounts:17	950	-	5963836	5964190	0	2	50,50	0,304
chrI	5967405	5967554	readCounts:3781	950	-	5967405	5967554	0	2	50,50	0,99
chrI	5967549	5967888	readCounts:3335	950	-	5967549	5967888	0	2	50,50	0,289
chrI	5967901	5968181	readCounts:4266	950	-	5967901	5968181	0	2	50,50	0,230
chrI	5968183	5968649	readCounts:4390	950	-	5968183	5968649	0	2	50,50	0,416
chrI	5968654	5968860	readCounts:3787	950	-	5968654	5968860	0	2	50,50	0,156
chrI	5968654	5969489	readCounts:10	950	-	5968654	5969489	0	2	50,50	0,785
chrI	5968836	5969004	readCounts:3187	950	-	5968836	5969004	0	2	50,50	0,118
chrI	5968953	5969108	readCounts:13	950	-	5968953	5969108	0	2	50,50	0,105
chrI	5968953	5969251	readCounts:5	950	-	5968953	5969251	0	2	50,50	0,248
chrI	5968953	5970352	readCounts:642	950	-	5968953	5970352	0	2	50,50	0,1349
chrI	5969102	5969251	readCounts:2365	950	-	5969102	5969251	0	2	50,50	0,99
chrI	5969182	5969489	readCounts:2235	950	-	5969182	5969489	0	2	50,50	0,257
chrI	5969524	5969668	readCounts:1244	950	-	5969524	5969668	0	2	50,50	0,94
chrI	5969682	5969887	readCounts:905	950	-	5969682	5969887	0	2	50,50	0,155
chrI	5969864	5970042	readCounts:537	950	-	5969864	5970042	0	2	50,50	0,128
chrI	5970030	5970178	readCounts:337	950	-	5970030	5970178	0	2	50,50	0,98
chrI	5970030	5970352	readCounts:53	950	-	5970030	5970352	0	2	50,50	0,272
chrI	5970143	5970352	readCounts:282	950	-	5970143	5970352	0	2	50,50	0,159
chrI	5970393	5970815	readCounts:858	950	-	5970393	5970815	0	2	50,50	0,372
chrI	5970798	5970951	readCounts:728	950	-	5970798	5970951	0	2	50,50	0,103
chrI	5970932	5971419	readCounts:667	950	-	5970932	5971419	0	2	50,50	0,437
chrI	5971408	5972632	readCounts:698	950	-	5971408	5972632	0	2	50,50	0,1174
chrI	5972693	5973213	readCounts:348	950	-	5972693	5973213	0	2	50,50	0,470
chrI	5955104	5955620	readCounts:440	950	+	5955104	5955620	0	2	50,50	0,466
chrI	5955609	5955754	readCounts:523	950	+	5955609	5955754	0	2	50,50	0,95
chrI	5955849	5956085	readCounts:1410	950	+	5955849	5956085	0	2	50,50	0,186
chrI	5956072	5956678	readCounts:1443	950	+	5956072	5956678	0	2	50,50	0,556
chrI	5956671	5956829	readCounts:1236	950	+	5956671	5956829	0	2	50,50	0,108
chrI	5942436	5942622	readCounts:170	950	+	5942436	5942622	0	2	50,50	0,136
chrI	5942609	5942876	readCounts:212	950	+	5942609	5942876	0	2	50,50	0,217
chrI	5942899	5943758	readCounts:252	950	+	5942899	5943758	0	2	50,50	0,809
chrI	5943595	5943758	readCounts:12	950	+	5943595	5943758	0	2	50,50	0,113
chrI	5943964	5944112	readCounts:536	950	+	5943964	5944112	0	2	50,50	0,98
chrI	5944141	5944398	readCounts:848	950	+	5944141	5944398	0	2	50,50	0,207
chrI	5944428	5944930	readCounts:906	950	+	5944428	5944930	0	2	50,50	0,452
chrI	5944941	5945095	readCounts:14	950	+	5944941	5945095	0	2	50,50	0,104
chrI	5944995	5945355	readCounts:15	950	+	5944995	5945355	0	2	50,50	0,310
chrI	5945029	5945355	readCounts:1048	950	+	5945029	5945355	0	2	50,50	0,276
chrI	5945374	5945521	readCounts:1017	950	+	5945374	5945521	0	2	50,50	0,97
chrI	5937501	5937650	readCounts:2541	950	+	5937501	5937650	0	2	50,50	0,99
chrI	5937659	5937835	readCounts:3130	950	+	5937659	5937835	0	2	50,50	0,126
chrI	5938103	5938266	readCounts:8311	950	+	5938103	5938266	0	2	50,50	0,113
chrI	5938440	5938640	readCounts:18356	950	+	5938440	5938640	0	2	50,50	0,150
chrI	5934091	5934236	readCounts:9	950	+	5934091	5934236	0	2	50,50	0,95
chrI	5934091	5934266	readCounts:13	950	+	5934091	5934266	0	2	50,50	0,125
chrI	5934271	5934622	readCounts:149	950	+	5934271	5934622	0	2	50,50	0,301
chrI	5934602	5935272	readCounts:107	950	+	5934602	5935272	0	2	50,50	0,620
chrI	5935634	5936254	readCounts:29	950	-	5935634	5936254	0	2	50,50	0,570
chrI	5935827	5936254	readCounts:7624	950	-	5935827	5936254	0	2	50,50	0,377
chrI	5936353	5936610	readCounts:5505	950	-	5936353	5936610	0	2	50,50	0,207
chrI	5936618	5936835	readCounts:4340	950	-	5936618	5936835	0	2	50,50	0,167
chrI	5936623	5936835	readCounts:332	950	-	5936623	5936835	0	2	50,50	0,162
chrI	5945662	5945806	readCounts:8795	950	-	5945662	5945806	0	2	50,50	0,94
chrI	5945755	5945908	readCounts:7592	950	-	5945755	5945908	0	2	50,50	0,103
chrI	5945763	5945908	readCounts:3966	950	-	5945763	5945908	0	2	50,50	0,95
chrI	5945974	5946121	readCounts:97	950	-	5945974	5946121	0	2	50,50	0,97
chrI	5946081	5946235	readCounts:7581	950	-	5946081	5946235	0	2	50,50	0,104
chrI	5946257	5946406	readCounts:7042	950	-	5946257	5946406	0	2	50,50	0,99
chrI	5946474	5946618	readCounts:10	950	-	5946474	5946618	0	2	50,50	0,94
chrI	5946474	5946829	readCounts:3988	950	-	5946474	5946829	0	2	50,50	0,305
chrI	5946666	5946829	readCounts:41	950	-	5946666	5946829	0	2	50,50	0,113
chrI	5946987	5947140	readCounts:2731	950	-	5946987	5947140	0	2	50,50	0,103
chrI	5947301	5947607	readCounts:1416	950	-	5947301	5947607	0	2	50,50	0,256
chrI	5957636	5958050	readCounts:10207	950	-	5957636	5958050	0	2	50,50	0,364
chrI	5957636	5958359	readCounts:7	950	-	5957636	5958359	0	2	50,50	0,673
chrI	5957648	5958050	readCounts:11	950	-	5957648	5958050	0	2	50,50	0,352
chrI	5958028	5958177	readCounts:8219	950	-	5958028	5958177	0	2	50,50	0,99
chrI	5958028	5958182	readCounts:23	950	-	5958028	5958182	0	2	50,50	0,104
chrI	5958028	5958359	readCounts:183	950	-	5958028	5958359	0	2	50,50	0,281
chrI	5958038	5958359	readCounts:5	950	-	5958038	5958359	0	2	50,50	0,271
chrI	5958182	5958359	readCounts:29	950	-	5958182	5958359	0	2	50,50	0,127
chrI	5958185	5958359	readCounts:5410	950	-	5958185	5958359	0	2	50,50	0,124
chrI	5958309	5958452	readCounts:3788	950	-	5958309	5958452	0	2	50,50	0,93
chrI	5263953	5264111	readCounts:858	950	+	5263953	5264111	0	2	50,50	0,108
chrI	5264435	5264867	readCounts:1014	950	+	5264435	5264867	0	2	50,50	0,382
chrI	5264864	5265011	readCounts:1233	950	+	5264864	5265011	0	2	50,50	0,97
chrI	5265036	5265175	readCounts:5	950	+	5265036	5265175	0	2	50,50	0,89
chrI	5265036	5265200	readCounts:1943	950	+	5265036	5265200	0	2	50,50	0,114
chrI	5265520	5266330	readCounts:3608	950	+	5265520	5266330	0	2	50,50	0,760
chrI	5266618	5266763	readCounts:7858	950	+	5266618	5266763	0	2	50,50	0,95
chrI	5266759	5267369	readCounts:9729	950	+	5266759	5267369	0	2	50,50	0,560
chrI	5267605	5268008	readCounts:14150	950	+	5267605	5268008	0	2	50,50	0,353
chrI	5245853	5246008	readCounts:64	950	+	5245853	5246008	0	2	50,50	0,105
chrI	5246009	5246162	readCounts:50	950	+	5246009	5246162	0	2	50,50	0,103
chrI	5246357	5246501	readCounts:32	950	+	5246357	5246501	0	2	50,50	0,94
chrI	5246731	5246880	readCounts:118	950	+	5246731	5246880	0	2	50,50	0,99
chrI	5246992	5247136	readCounts:189	950	+	5246992	5247136	0	2	50,50	0,94
chrI	5247097	5247247	readCounts:207	950	+	5247097	5247247	0	2	50,50	0,100
chrI	5247320	5247559	readCounts:94	950	+	5247320	5247559	0	2	50,50	0,189
chrI	5247573	5247719	readCounts:105	950	+	5247573	5247719	0	2	50,50	0,96
chrI	5247917	5248624	readCounts:228	950	+	5247917	5248624	0	2	50,50	0,657
chrI	5248638	5248787	readCounts:221	950	+	5248638	5248787	0	2	50,50	0,99
chrI	5248865	5249401	readCounts:193	950	+	5248865	5249401	0	2	50,50	0,486
chrI	5249672	5250904	readCounts:40	950	+	5249672	5250904	0	2	50,50	0,1182
chrI	5250948	5251099	readCounts:45	950	+	5250948	5251099	0	2	50,50	0,101
chrI	5251614	5252197	readCounts:53	950	+	5251614	5252197	0	2	50,50	0,533
chrI	5252265	5252413	readCounts:102	950	+	5252265	5252413	0	2	50,50	0,98
chrI	5252899	5253244	readCounts:25	950	+	5252899	5253244	0	2	50,50	0,295
chrI	5252899	5253250	readCounts:27	950	+	5252899	5253250	0	2	50,50	0,301
chrI	5253329	5253476	readCounts:104	950	+	5253329	5253476	0	2	50,50	0,97
chrI	5253774	5254212	readCounts:195	950	+	5253774	5254212	0	2	50,50	0,388
chrI	5254528	5255190	readCounts:245	950	+	5254528	5255190	0	2	50,50	0,612
chrI	5255181	5255327	readCounts:209	950	+	5255181	5255327	0	2	50,50	0,96
chrI	5255384	5257137	readCounts:193	950	+	5255384	5257137	0	2	50,50	0,1703
chrI	5257538	5258404	readCounts:227	950	+	5257538	5258404	0	2	50,50	0,816
chrI	5258510	5258657	readCounts:321	950	+	5258510	5258657	0	2	50,50	0,97
chrI	5258700	5259345	readCounts:54	950	+	5258700	5259345	0	2	50,50	0,595
chrI	5258700	5259354	readCounts:259	950	+	5258700	5259354	0	2	50,50	0,604
chrI	5259808	5260333	readCounts:1052	950	+	5259808	5260333	0	2	50,50	0,475
chrI	5260329	5260473	readCounts:215	950	+	5260329	5260473	0	2	50,50	0,94
chrI	5260329	5260475	readCounts:33	950	+	5260329	5260475	0	2	50,50	0,96
chrI	5260329	5260485	readCounts:1224	950	+	5260329	5260485	0	2	50,50	0,106
chrI	5260586	5260735	readCounts:3514	950	+	5260586	5260735	0	2	50,50	0,99
chrI	5260800	5261131	readCounts:3077	950	+	5260800	5261131	0	2	50,50	0,281
chrI	5261567	5262238	readCounts:8006	950	+	5261567	5262238	0	2	50,50	0,621
chrI	5261827	5262238	readCounts:130	950	+	5261827	5262238	0	2	50,50	0,361
chrI	5262277	5262431	readCounts:12057	950	+	5262277	5262431	0	2	50,50	0,104
chrI	5262599	5262900	readCounts:23999	950	+	5262599	5262900	0	2	50,50	0,251
chrI	5244437	5244591	readCounts:20748	950	+	5244437	5244591	0	2	50,50	0,104
chrI	5244656	5244806	readCounts:19214	950	+	5244656	5244806	0	2	50,50	0,100
chrI	5244812	5244955	readCounts:19351	950	+	5244812	5244955	0	2	50,50	0,93
chrI	5244977	5245125	readCounts:24679	950	+	5244977	5245125	0	2	50,50	0,98
chrI	5249841	5250001	readCounts:3536	950	-	5249841	5250001	0	2	50,50	0,110
chrI	5250387	5250532	readCounts:2453	950	-	5250387	5250532	0	2	50,50	0,95
chrI	5255718	5256472	readCounts:150	950	-	5255718	5256472	0	2	50,50	0,704
chrI	5255732	5256472	readCounts:50422	950	-	5255732	5256472	0	2	50,50	0,690
chrI	5255732	5256872	readCounts:84	950	-	5255732	5256872	0	2	50,50	0,1090
chrI	5256484	5256872	readCounts:756	950	-	5256484	5256872	0	2	50,50	0,338
chrI	5256527	5256872	readCounts:2877	950	-	5256527	5256872	0	2	50,50	0,295
chrI	5256530	5256680	readCounts:12	950	-	5256530	5256680	0	2	50,50	0,100
chrI	5256530	5256872	readCounts:50153	950	-	5256530	5256872	0	2	50,50	0,292
chrI	5256718	5256872	readCounts:6	950	-	5256718	5256872	0	2	50,50	0,104
chrI	5269606	5269753	readCounts:19467	950	-	5269606	5269753	0	2	50,50	0,97
chrI	5269850	5269998	readCounts:67	950	-	5269850	5269998	0	2	50,50	0,98
chrI	5269850	5270002	readCounts:19820	950	-	5269850	5270002	0	2	50,50	0,102
chrI	5270084	5270259	readCounts:39	950	-	5270084	5270259	0	2	50,50	0,125
chrI	5270118	5270259	readCounts:17540	950	-	5270118	5270259	0	2	50,50	0,91
chrI	5270306	5270452	readCounts:18600	950	-	5270306	5270452	0	2	50,50	0,96
chrI	5270306	5270455	readCounts:17	950	-	5270306	5270455	0	2	50,50	0,99
chrI	5270475	5270621	readCounts:14682	950	-	5270475	5270621	0	2	50,50	0,96
chrI	5271471	5271623	readCounts:33	950	-	5271471	5271623	0	2	50,50	0,102
chrI	5271471	5271627	readCounts:17520	950	-	5271471	5271627	0	2	50,50	0,106
chrI	5271869	5272026	readCounts:11930	950	-	5271869	5272026	0	2	50,50	0,107
chrI	5268516	5269110	readCounts:52	950	+	5268516	5269110	0	2	50,50	0,544
chrI	5268964	5269110	readCounts:5	950	+	5268964	5269110	0	2	50,50	0,96
chrI	5269219	5269366	readCounts:140	950	+	5269219	5269366	0	2	50,50	0,97
chrI	10074976	10075320	readCounts:20362	950	+	10074976	10075320	0	2	50,50	0,294
chrI	10075324	10075764	readCounts:25772	950	+	10075324	10075764	0	2	50,50	0,390
chrI	10075324	10075772	readCounts:49	950	+	10075324	10075772	0	2	50,50	0,398
chrI	10075324	10077194	readCounts:23	950	+	10075324	10077194	0	2	50,50	0,1820
chrI	10075371	10075764	readCounts:12	950	+	10075371	10075764	0	2	50,50	0,343
chrI	10075799	10077194	readCounts:31605	950	+	10075799	10077194	0	2	50,50	0,1345
chrI	10076888	10077194	readCounts:41	950	+	10076888	10077194	0	2	50,50	0,256
chrI	10077184	10077339	readCounts:33596	950	+	10077184	10077339	0	2	50,50	0,105
chrI	10077341	10077485	readCounts:34176	950	+	10077341	10077485	0	2	50,50	0,94
chrI	10077341	10077492	readCounts:9	950	+	10077341	10077492	0	2	50,50	0,101
chrI	10070954	10071099	readCounts:20623	950	-	10070954	10071099	0	2	50,50	0,95
chrI	10071049	10071193	readCounts:21120	950	-	10071049	10071193	0	2	50,50	0,94
chrI	10071570	10071716	readCounts:14366	950	-	10071570	10071716	0	2	50,50	0,96
chrI	10071570	10071833	readCounts:949	950	-	10071570	10071833	0	2	50,50	0,213
chrI	10071685	10071833	readCounts:10162	950	-	10071685	10071833	0	2	50,50	0,98
chrI	10080351	10080495	readCounts:149	950	+	10080351	10080495	0	2	50,50	0,94
chrI	10080518	10080659	readCounts:13	950	+	10080518	10080659	0	2	50,50	0,91
chrI	10080518	10080671	readCounts:90	950	+	10080518	10080671	0	2	50,50	0,103
chrI	10080739	10080885	readCounts:262	950	+	10080739	10080885	0	2	50,50	0,96
chrI	10080910	10081462	readCounts:176	950	+	10080910	10081462	0	2	50,50	0,502
chrI	10081754	10081904	readCounts:272	950	+	10081754	10081904	0	2	50,50	0,100
chrI	10081927	10082072	readCounts:278	950	+	10081927	10082072	0	2	50,50	0,95
chrI	10082085	10082265	readCounts:443	950	+	10082085	10082265	0	2	50,50	0,130
chrI	10082400	10082894	readCounts:44	950	+	10082400	10082894	0	2	50,50	0,444
chrI	10082595	10082894	readCounts:689	950	+	10082595	10082894	0	2	50,50	0,249
chrI	10083103	10083247	readCounts:1117	950	+	10083103	10083247	0	2	50,50	0,94
chrI	10083103	10083253	readCounts:491	950	+	10083103	10083253	0	2	50,50	0,100
chrI	10083214	10083364	readCounts:1937	950	+	10083214	10083364	0	2	50,50	0,100
chrI	10083337	10083972	readCounts:2408	950	+	10083337	10083972	0	2	50,50	0,585
chrI	10083817	10083972	readCounts:86	950	+	10083817	10083972	0	2	50,50	0,105
chrI	10083991	10084399	readCounts:3831	950	+	10083991	10084399	0	2	50,50	0,358
chrI	10085023	10085416	readCounts:19350	950	+	10085023	10085416	0	2	50,50	0,343
chrI	10086558	10086837	readCounts:7976	950	-	10086558	10086837	0	2	50,50	0,229
chrI	10086818	10087000	readCounts:9211	950	-	10086818	10087000	0	2	50,50	0,132
chrI	10086818	10087438	readCounts:25	950	-	10086818	10087438	0	2	50,50	0,570
chrI	10086986	10087438	readCounts:7815	950	-	10086986	10087438	0	2	50,50	0,402
chrI	10086986	10087453	readCounts:18	950	-	10086986	10087453	0	2	50,50	0,417
chrI	10086986	10087892	readCounts:5	950	-	10086986	10087892	0	2	50,50	0,856
chrI	10087438	10087892	readCounts:6054	950	-	10087438	10087892	0	2	50,50	0,404
chrI	10087942	10088437	readCounts:6081	950	-	10087942	10088437	0	2	50,50	0,445
chrI	10088445	10088649	readCounts:723	950	-	10088445	10088649	0	2	50,50	0,154
chrI	10088445	10088943	readCounts:5	950	-	10088445	10088943	0	2	50,50	0,448
chrI	10088445	10089911	readCounts:3910	950	-	10088445	10089911	0	2	50,50	0,1416
chrI	10088454	10089911	readCounts:173	950	-	10088454	10089911	0	2	50,50	0,1407
chrI	10088886	10089039	readCounts:6	950	-	10088886	10089039	0	2	50,50	0,103
chrI	10089922	10091475	readCounts:2933	950	-	10089922	10091475	0	2	50,50	0,1503
chrI	10091482	10092761	readCounts:29	950	-	10091482	10092761	0	2	50,50	0,1229
chrI	10091482	10093728	readCounts:3562	950	-	10091482	10093728	0	2	50,50	0,2196
chrI	10093727	10093914	readCounts:617	950	-	10093727	10093914	0	2	50,50	0,137
chrI	10093727	10100713	readCounts:1884	950	-	10093727	10100713	0	2	50,50	0,6936
chrI	10093733	10093914	readCounts:22	950	-	10093733	10093914	0	2	50,50	0,131
chrI	10093733	10100713	readCounts:385	950	-	10093733	10100713	0	2	50,50	0,6930
chrI	10094430	10100713	readCounts:7	950	-	10094430	10100713	0	2	50,50	0,6233
chrI	10096406	10100713	readCounts:10	950	-	10096406	10100713	0	2	50,50	0,4257
chrI	10100710	10101954	readCounts:1521	950	-	10100710	10101954	0	2	50,50	0,1194
chrI	10072642	10072790	readCounts:24531	950	-	10072642	10072790	0	2	50,50	0,98
chrI	10072731	10072883	readCounts:7	950	-	10072731	10072883	0	2	50,50	0,102
chrI	10072739	10072883	readCounts:2036	950	-	10072739	10072883	0	2	50,50	0,94
chrI	10072739	10072918	readCounts:24998	950	-	10072739	10072918	0	2	50,50	0,129
chrI	10072739	10073083	readCounts:12	950	-	10072739	10073083	0	2	50,50	0,294
chrI	10072917	10073083	readCounts:75	950	-	10072917	10073083	0	2	50,50	0,116
chrI	10073240	10073388	readCounts:11249	950	-	10073240	10073388	0	2	50,50	0,98
chrI	10074012	10074384	readCounts:1302	950	-	10074012	10074384	0	2	50,50	0,322
chrI	5801977	5802143	readCounts:13	950	+	5801977	5802143	0	2	50,50	0,116
chrI	5802147	5802317	readCounts:6	950	+	5802147	5802317	0	2	50,50	0,120
chrI	5802147	5802549	readCounts:5	950	+	5802147	5802549	0	2	50,50	0,352
chrI	5802584	5802734	readCounts:20	950	+	5802584	5802734	0	2	50,50	0,100
chrI	5802853	5803010	readCounts:38	950	+	5802853	5803010	0	2	50,50	0,107
chrI	5776190	5776332	readCounts:6	950	+	5776190	5776332	0	2	50,50	0,92
chrI	5776359	5776512	readCounts:72	950	+	5776359	5776512	0	2	50,50	0,103
chrI	5776554	5783860	readCounts:15	950	+	5776554	5783860	0	2	50,50	0,7256
chrI	5783859	5784856	readCounts:289	950	+	5783859	5784856	0	2	50,50	0,947
chrI	5783859	5785230	readCounts:8	950	+	5783859	5785230	0	2	50,50	0,1321
chrI	5784874	5785230	readCounts:218	950	+	5784874	5785230	0	2	50,50	0,306
chrI	5785250	5786151	readCounts:317	950	+	5785250	5786151	0	2	50,50	0,851
chrI	5785250	5787201	readCounts:59	950	+	5785250	5787201	0	2	50,50	0,1901
chrI	5786125	5787201	readCounts:729	950	+	5786125	5787201	0	2	50,50	0,1026
chrI	5787218	5787927	readCounts:1030	950	+	5787218	5787927	0	2	50,50	0,659
chrI	5787886	5788038	readCounts:1064	950	+	5787886	5788038	0	2	50,50	0,102
chrI	5788057	5788209	readCounts:1007	950	+	5788057	5788209	0	2	50,50	0,102
chrI	5774807	5775066	readCounts:27346	950	+	5774807	5775066	0	2	50,50	0,209
chrI	5775095	5775240	readCounts:105	950	+	5775095	5775240	0	2	50,50	0,95
chrI	5775305	5775435	readCounts:1064	950	+	5775305	5775435	0	2	50,50	0,80
chrI	5789331	5789506	readCounts:7429	950	-	5789331	5789506	0	2	50,50	0,125
chrI	5789619	5789795	readCounts:2678	950	-	5789619	5789795	0	2	50,50	0,126
chrI	5790296	5790470	readCounts:1473	950	-	5790296	5790470	0	2	50,50	0,124
chrI	5790296	5790519	readCounts:6	950	-	5790296	5790519	0	2	50,50	0,173
chrI	5790529	5790673	readCounts:1331	950	-	5790529	5790673	0	2	50,50	0,94
chrI	5791503	5791650	readCounts:237	950	-	5791503	5791650	0	2	50,50	0,97
chrI	5792735	5792880	readCounts:14	950	-	5792735	5792880	0	2	50,50	0,95
chrI	5792735	5792884	readCounts:6677	950	-	5792735	5792884	0	2	50,50	0,99
chrI	5792735	5792951	readCounts:26	950	-	5792735	5792951	0	2	50,50	0,166
chrI	5792966	5793112	readCounts:3393	950	-	5792966	5793112	0	2	50,50	0,96
chrI	5793116	5793261	readCounts:3011	950	-	5793116	5793261	0	2	50,50	0,95
chrI	5794394	5794605	readCounts:543	950	-	5794394	5794605	0	2	50,50	0,161
chrI	5794859	5795006	readCounts:301	950	-	5794859	5795006	0	2	50,50	0,97
chrI	5795591	5795739	readCounts:7617	950	-	5795591	5795739	0	2	50,50	0,98
chrI	5795597	5795739	readCounts:92	950	-	5795597	5795739	0	2	50,50	0,92
chrI	5795795	5795943	readCounts:154	950	-	5795795	5795943	0	2	50,50	0,98
chrI	5795795	5795971	readCounts:9916	950	-	5795795	5795971	0	2	50,50	0,126
chrI	5795806	5795971	readCounts:5	950	-	5795806	5795971	0	2	50,50	0,115
chrI	5796500	5796647	readCounts:3068	950	-	5796500	5796647	0	2	50,50	0,97
chrI	5796671	5796927	readCounts:2449	950	-	5796671	5796927	0	2	50,50	0,206
chrI	5797334	5797483	readCounts:831	950	-	5797334	5797483	0	2	50,50	0,99
chrI	5797488	5797629	readCounts:1190	950	-	5797488	5797629	0	2	50,50	0,91
chrI	5797488	5798098	readCounts:19	950	-	5797488	5798098	0	2	50,50	0,560
chrI	5797661	5798098	readCounts:758	950	-	5797661	5798098	0	2	50,50	0,387
chrI	5798784	5798928	readCounts:157	950	-	5798784	5798928	0	2	50,50	0,94
chrI	5799461	5799748	readCounts:98	950	-	5799461	5799748	0	2	50,50	0,237
chrI	5799911	5800246	readCounts:114	950	-	5799911	5800246	0	2	50,50	0,285
chrI	5800372	5800518	readCounts:6	950	-	5800372	5800518	0	2	50,50	0,96
chrI	5800372	5800520	readCounts:90	950	-	5800372	5800520	0	2	50,50	0,98
chrI	5800783	5800932	readCounts:55	950	-	5800783	5800932	0	2	50,50	0,99
chrI	5800906	5801066	readCounts:84	950	-	5800906	5801066	0	2	50,50	0,110
chrI	5801058	5801247	readCounts:44	950	-	5801058	5801247	0	2	50,50	0,139
chrI	5801065	5801247	readCounts:6	950	-	5801065	5801247	0	2	50,50	0,132
chrI	5804189	5804689	readCounts:15270	950	-	5804189	5804689	0	2	50,50	0,450
chrI	5804619	5804762	readCounts:173	950	-	5804619	5804762	0	2	50,50	0,93
chrI	5804748	5804894	readCounts:11225	950	-	5804748	5804894	0	2	50,50	0,96
chrI	5804876	5805192	readCounts:11036	950	-	5804876	5805192	0	2	50,50	0,266
chrI	5804876	5805197	readCounts:54	950	-	5804876	5805197	0	2	50,50	0,271
chrI	5804876	5805708	readCounts:10	950	-	5804876	5805708	0	2	50,50	0,782
chrI	5805191	5805344	readCounts:10493	950	-	5805191	5805344	0	2	50,50	0,103
chrI	5805191	5805349	readCounts:16	950	-	5805191	5805349	0	2	50,50	0,108
chrI	5805205	5805344	readCounts:28	950	-	5805205	5805344	0	2	50,50	0,89
chrI	5805485	5805630	readCounts:31	950	-	5805485	5805630	0	2	50,50	0,95
chrI	5805542	5805708	readCounts:5395	950	-	5805542	5805708	0	2	50,50	0,116
chrI	5805762	5805932	readCounts:4971	950	-	5805762	5805932	0	2	50,50	0,120
chrI	5806162	5806310	readCounts:2116	950	-	5806162	5806310	0	2	50,50	0,98
chrI	5806642	5806801	readCounts:1021	950	-	5806642	5806801	0	2	50,50	0,109
chrI	5806863	5807014	readCounts:815	950	-	5806863	5807014	0	2	50,50	0,101
chrI	5807089	5807232	readCounts:696	950	-	5807089	5807232	0	2	50,50	0,93
chrI	10667951	10668685	readCounts:1145	950	+	10667951	10668685	0	2	50,50	0,684
chrI	10668770	10669106	readCounts:1971	950	+	10668770	10669106	0	2	50,50	0,286
chrI	10669081	10669227	readCounts:1673	950	+	10669081	10669227	0	2	50,50	0,96
chrI	10669226	10670307	readCounts:2586	950	+	10669226	10670307	0	2	50,50	0,1031
chrI	10670515	10670712	readCounts:3952	950	+	10670515	10670712	0	2	50,50	0,147
chrI	10670784	10670945	readCounts:2434	950	+	10670784	10670945	0	2	50,50	0,111
chrI	10640830	10641211	readCounts:793	950	-	10640830	10641211	0	2	50,50	0,331
chrI	10641060	10641211	readCounts:8	950	-	10641060	10641211	0	2	50,50	0,101
chrI	10641213	10641368	readCounts:28579	950	-	10641213	10641368	0	2	50,50	0,105
chrI	10641745	10641891	readCounts:6114	950	-	10641745	10641891	0	2	50,50	0,96
chrI	10642067	10642235	readCounts:3019	950	-	10642067	10642235	0	2	50,50	0,118
chrI	10648699	10648846	readCounts:6016	950	-	10648699	10648846	0	2	50,50	0,97
chrI	10648850	10648997	readCounts:6160	950	-	10648850	10648997	0	2	50,50	0,97
chrI	10649002	10649147	readCounts:5171	950	-	10649002	10649147	0	2	50,50	0,95
chrI	10649123	10649337	readCounts:4439	950	-	10649123	10649337	0	2	50,50	0,164
chrI	10649783	10650059	readCounts:2949	950	-	10649783	10650059	0	2	50,50	0,226
chrI	10650189	10650335	readCounts:1228	950	-	10650189	10650335	0	2	50,50	0,96
chrI	10650380	10653848	readCounts:751	950	-	10650380	10653848	0	2	50,50	0,3418
chrI	10650380	10654210	readCounts:59	950	-	10650380	10654210	0	2	50,50	0,3780
chrI	10654062	10654210	readCounts:263	950	-	10654062	10654210	0	2	50,50	0,98
chrI	10654667	10655087	readCounts:9309	950	-	10654667	10655087	0	2	50,50	0,370
chrI	10655098	10655244	readCounts:6239	950	-	10655098	10655244	0	2	50,50	0,96
chrI	10655270	10655704	readCounts:5693	950	-	10655270	10655704	0	2	50,50	0,384
chrI	10656415	10656564	readCounts:1676	950	-	10656415	10656564	0	2	50,50	0,99
chrI	10656587	10656740	readCounts:1495	950	-	10656587	10656740	0	2	50,50	0,103
chrI	10656958	10657498	readCounts:930	950	-	10656958	10657498	0	2	50,50	0,490
chrI	10657542	10657697	readCounts:1159	950	-	10657542	10657697	0	2	50,50	0,105
chrI	10657542	10657764	readCounts:41	950	-	10657542	10657764	0	2	50,50	0,172
chrI	10657555	10657697	readCounts:30	950	-	10657555	10657697	0	2	50,50	0,92
chrI	10657893	10658473	readCounts:654	950	-	10657893	10658473	0	2	50,50	0,530
chrI	10658668	10658815	readCounts:382	950	-	10658668	10658815	0	2	50,50	0,97
chrI	10658971	10659122	readCounts:213	950	-	10658971	10659122	0	2	50,50	0,101
chrI	10659263	10659413	readCounts:81	950	-	10659263	10659413	0	2	50,50	0,100
chrI	10659517	10659665	readCounts:74	950	-	10659517	10659665	0	2	50,50	0,98
chrI	10659769	10659917	readCounts:48	950	-	10659769	10659917	0	2	50,50	0,98
chrI	10660181	10660333	readCounts:59	950	-	10660181	10660333	0	2	50,50	0,102
chrI	10660473	10660634	readCounts:59	950	-	10660473	10660634	0	2	50,50	0,111
chrI	10660991	10661135	readCounts:41	950	-	10660991	10661135	0	2	50,50	0,94
chrI	10661220	10661386	readCounts:45	950	-	10661220	10661386	0	2	50,50	0,116
chrI	10661686	10661834	readCounts:57	950	-	10661686	10661834	0	2	50,50	0,98
chrI	10661892	10662857	readCounts:36	950	-	10661892	10662857	0	2	50,50	0,915
chrI	10663143	10663947	readCounts:47	950	-	10663143	10663947	0	2	50,50	0,754
chrI	10664359	10665798	readCounts:36	950	-	10664359	10665798	0	2	50,50	0,1389
chrI	10665184	10665798	readCounts:289	950	-	10665184	10665798	0	2	50,50	0,564
chrI	10665746	10665893	readCounts:382	950	-	10665746	10665893	0	2	50,50	0,97
chrI	10665970	10666389	readCounts:302	950	-	10665970	10666389	0	2	50,50	0,369
chrI	10666392	10666538	readCounts:224	950	-	10666392	10666538	0	2	50,50	0,96
chrI	10666607	10666859	readCounts:216	950	-	10666607	10666859	0	2	50,50	0,202
chrI	10634749	10634900	readCounts:3190	950	-	10634749	10634900	0	2	50,50	0,101
chrI	10635083	10635240	readCounts:3663	950	-	10635083	10635240	0	2	50,50	0,107
chrI	10635099	10635240	readCounts:56	950	-	10635099	10635240	0	2	50,50	0,91
chrI	10635359	10635551	readCounts:41	950	-	10635359	10635551	0	2	50,50	0,142
chrI	10635359	10635588	readCounts:3049	950	-	10635359	10635588	0	2	50,50	0,179
chrI	10635359	10635783	readCounts:6	950	-	10635359	10635783	0	2	50,50	0,374
chrI	10635785	10635934	readCounts:1953	950	-	10635785	10635934	0	2	50,50	0,99
chrI	10643094	10643628	readCounts:98	950	+	10643094	10643628	0	2	50,50	0,484
chrI	10633567	10633809	readCounts:5	950	-	10633567	10633809	0	2	50,50	0,192
chrI	10633575	10633809	readCounts:14207	950	-	10633575	10633809	0	2	50,50	0,184
chrI	10651538	10652392	readCounts:564	950	+	10651538	10652392	0	2	50,50	0,804
chrI	10651555	10652392	readCounts:87	950	+	10651555	10652392	0	2	50,50	0,787
chrI	10652705	10652852	readCounts:905	950	+	10652705	10652852	0	2	50,50	0,97
chrI	10652887	10653038	readCounts:2445	950	+	10652887	10653038	0	2	50,50	0,101
chrI	10652889	10653038	readCounts:32	950	+	10652889	10653038	0	2	50,50	0,99
chrI	10646750	10646899	readCounts:2154	950	+	10646750	10646899	0	2	50,50	0,99
chrI	10646871	10647020	readCounts:2517	950	+	10646871	10647020	0	2	50,50	0,99
chrI	10647070	10647219	readCounts:8	950	+	10647070	10647219	0	2	50,50	0,99
chrI	10647472	10647623	readCounts:3158	950	+	10647472	10647623	0	2	50,50	0,101
chrI	10644354	10644499	readCounts:1945	950	+	10644354	10644499	0	2	50,50	0,95
chrI	10644504	10644651	readCounts:2134	950	+	10644504	10644651	0	2	50,50	0,97
chrI	10644874	10645021	readCounts:4996	950	+	10644874	10645021	0	2	50,50	0,97
chrI	10645232	10645378	readCounts:4263	950	+	10645232	10645378	0	2	50,50	0,96
chrI	10628845	10629764	readCounts:1190	950	+	10628845	10629764	0	2	50,50	0,869
chrI	10629733	10630263	readCounts:1444	950	+	10629733	10630263	0	2	50,50	0,480
chrI	10630360	10630924	readCounts:1765	950	+	10630360	10630924	0	2	50,50	0,514
chrI	10630896	10631044	readCounts:1759	950	+	10630896	10631044	0	2	50,50	0,98
chrI	10631086	10631353	readCounts:2264	950	+	10631086	10631353	0	2	50,50	0,217
chrI	10625629	10626236	readCounts:6	950	+	10625629	10626236	0	2	50,50	0,557
chrI	10625656	10625804	readCounts:5718	950	+	10625656	10625804	0	2	50,50	0,98
chrI	10626427	10627030	readCounts:18041	950	+	10626427	10627030	0	2	50,50	0,553
chrI	10627233	10627592	readCounts:48083	950	+	10627233	10627592	0	2	50,50	0,309
chrI	10627609	10627828	readCounts:61518	950	+	10627609	10627828	0	2	50,50	0,169
chrI	10627830	10628195	readCounts:59731	950	+	10627830	10628195	0	2	50,50	0,315
chrI	10627830	10628201	readCounts:5	950	+	10627830	10628201	0	2	50,50	0,321
chrI	10632172	10632615	readCounts:16327	950	-	10632172	10632615	0	2	50,50	0,393
chrI	10632172	10632684	readCounts:9	950	-	10632172	10632684	0	2	50,50	0,462
chrI	10632688	10632835	readCounts:6	950	-	10632688	10632835	0	2	50,50	0,97
chrI	10632688	10632839	readCounts:9560	950	-	10632688	10632839	0	2	50,50	0,101
chrI	10632839	10632994	readCounts:6135	950	-	10632839	10632994	0	2	50,50	0,105
chrI	10632948	10633092	readCounts:6741	950	-	10632948	10633092	0	2	50,50	0,94
chrI	10636801	10636961	readCounts:82	950	-	10636801	10636961	0	2	50,50	0,110
chrI	10636811	10636961	readCounts:15	950	-	10636811	10636961	0	2	50,50	0,100
chrI	10636815	10636961	readCounts:5	950	-	10636815	10636961	0	2	50,50	0,96
chrI	10636817	10636961	readCounts:48475	950	-	10636817	10636961	0	2	50,50	0,94
chrI	10636817	10636967	readCounts:31	950	-	10636817	10636967	0	2	50,50	0,100
chrI	10637190	10637785	readCounts:26659	950	-	10637190	10637785	0	2	50,50	0,545
chrI	10638298	10638445	readCounts:4760	950	-	10638298	10638445	0	2	50,50	0,97
chrI	10639122	10639427	readCounts:40	950	-	10639122	10639427	0	2	50,50	0,255
chrI	10639404	10639548	readCounts:3447	950	-	10639404	10639548	0	2	50,50	0,94
chrI	10639404	10639551	readCounts:11514	950	-	10639404	10639551	0	2	50,50	0,97
chrI	10639701	10639872	readCounts:12	950	-	10639701	10639872	0	2	50,50	0,121
chrI	10639701	10639890	readCounts:1049	950	-	10639701	10639890	0	2	50,50	0,139
chrI	10639701	10639968	readCounts:9491	950	-	10639701	10639968	0	2	50,50	0,217
chrI	10639823	10639968	readCounts:1059	950	-	10639823	10639968	0	2	50,50	0,95
chrI	10639925	10640072	readCounts:8	950	-	10639925	10640072	0	2	50,50	0,97
chrI	10639927	10640072	readCounts:9000	950	-	10639927	10640072	0	2	50,50	0,95
chrI	13410459	13410614	readCounts:74	950	-	13410459	13410614	0	2	50,50	0,105
chrI	13410459	13411048	readCounts:122	950	-	13410459	13411048	0	2	50,50	0,539
chrI	13410689	13411048	readCounts:50	950	-	13410689	13411048	0	2	50,50	0,309
chrI	13397323	13397551	readCounts:10919	950	+	13397323	13397551	0	2	50,50	0,178
chrI	13397530	13397723	readCounts:8916	950	+	13397530	13397723	0	2	50,50	0,143
chrI	13397744	13397893	readCounts:9717	950	+	13397744	13397893	0	2	50,50	0,99
chrI	13397881	13398080	readCounts:10158	950	+	13397881	13398080	0	2	50,50	0,149
chrI	13398119	13398398	readCounts:12572	950	+	13398119	13398398	0	2	50,50	0,229
chrI	13388070	13388976	readCounts:11617	950	+	13388070	13388976	0	2	50,50	0,856
chrI	13389174	13389334	readCounts:12	950	+	13389174	13389334	0	2	50,50	0,110
chrI	13389196	13389884	readCounts:11	950	+	13389196	13389884	0	2	50,50	0,638
chrI	13389335	13389884	readCounts:100	950	+	13389335	13389884	0	2	50,50	0,499
chrI	13389430	13389884	readCounts:18880	950	+	13389430	13389884	0	2	50,50	0,404
chrI	13389950	13390926	readCounts:38835	950	+	13389950	13390926	0	2	50,50	0,926
chrI	13392119	13392320	readCounts:13039	950	+	13392119	13392320	0	2	50,50	0,151
chrI	13392119	13392330	readCounts:9	950	+	13392119	13392330	0	2	50,50	0,161
chrI	13392455	13393435	readCounts:18193	950	+	13392455	13393435	0	2	50,50	0,930
chrI	13392455	13393720	readCounts:9	950	+	13392455	13393720	0	2	50,50	0,1215
chrI	13393486	13393720	readCounts:19813	950	+	13393486	13393720	0	2	50,50	0,184
chrI	13393731	13393883	readCounts:20245	950	+	13393731	13393883	0	2	50,50	0,102
chrI	13384815	13385162	readCounts:14342	950	+	13384815	13385162	0	2	50,50	0,297
chrI	13385579	13385818	readCounts:10	950	+	13385579	13385818	0	2	50,50	0,189
chrI	13385730	13386798	readCounts:30946	950	+	13385730	13386798	0	2	50,50	0,1018
chrI	13386258	13386798	readCounts:11	950	+	13386258	13386798	0	2	50,50	0,490
chrI	13381416	13383504	readCounts:20	950	+	13381416	13383504	0	2	50,50	0,2038
chrI	13383358	13383504	readCounts:23	950	+	13383358	13383504	0	2	50,50	0,96
chrI	13383820	13384072	readCounts:75	950	+	13383820	13384072	0	2	50,50	0,202
chrI	13402462	13403240	readCounts:17331	950	+	13402462	13403240	0	2	50,50	0,728
chrI	13403243	13403395	readCounts:12	950	+	13403243	13403395	0	2	50,50	0,102
chrI	13403247	13403395	readCounts:28105	950	+	13403247	13403395	0	2	50,50	0,98
chrI	13403247	13403399	readCounts:5	950	+	13403247	13403399	0	2	50,50	0,102
chrI	13403423	13403607	readCounts:2980	950	+	13403423	13403607	0	2	50,50	0,134
chrI	13403423	13403782	readCounts:34715	950	+	13403423	13403782	0	2	50,50	0,309
chrI	13403564	13403782	readCounts:3505	950	+	13403564	13403782	0	2	50,50	0,168
chrI	13376892	13377095	readCounts:6	950	+	13376892	13377095	0	2	50,50	0,153
chrI	13376892	13377191	readCounts:249	950	+	13376892	13377191	0	2	50,50	0,249
chrI	4851084	4851653	readCounts:1883	950	-	4851084	4851653	0	2	50,50	0,519
chrI	4852181	4852369	readCounts:1060	950	-	4852181	4852369	0	2	50,50	0,138
chrI	4852428	4852578	readCounts:1079	950	-	4852428	4852578	0	2	50,50	0,100
chrI	4852627	4852768	readCounts:9	950	-	4852627	4852768	0	2	50,50	0,91
chrI	4852627	4852772	readCounts:1095	950	-	4852627	4852772	0	2	50,50	0,95
chrI	4853259	4853669	readCounts:262	950	-	4853259	4853669	0	2	50,50	0,360
chrI	4853777	4853938	readCounts:203	950	-	4853777	4853938	0	2	50,50	0,111
chrI	4853789	4853938	readCounts:67	950	-	4853789	4853938	0	2	50,50	0,99
chrI	4853995	4854433	readCounts:186	950	-	4853995	4854433	0	2	50,50	0,388
chrI	4854454	4855896	readCounts:161	950	-	4854454	4855896	0	2	50,50	0,1392
chrI	4855963	4856788	readCounts:8	950	-	4855963	4856788	0	2	50,50	0,775
chrI	4855963	4864658	readCounts:60	950	-	4855963	4864658	0	2	50,50	0,8645
chrI	4864715	4866973	readCounts:51	950	-	4864715	4866973	0	2	50,50	0,2208
chrI	4866690	4866973	readCounts:5	950	-	4866690	4866973	0	2	50,50	0,233
chrI	4866957	4867192	readCounts:42	950	-	4866957	4867192	0	2	50,50	0,185
chrI	4867225	4867637	readCounts:37	950	-	4867225	4867637	0	2	50,50	0,362
chrI	5273201	5273354	readCounts:10391	950	-	5273201	5273354	0	2	50,50	0,103
chrI	5273452	5273604	readCounts:10085	950	-	5273452	5273604	0	2	50,50	0,102
chrI	5273452	5273607	readCounts:5	950	-	5273452	5273607	0	2	50,50	0,105
chrI	5273695	5273844	readCounts:20	950	-	5273695	5273844	0	2	50,50	0,99
chrI	5273698	5273844	readCounts:6767	950	-	5273698	5273844	0	2	50,50	0,96
chrI	5273698	5273850	readCounts:7	950	-	5273698	5273850	0	2	50,50	0,102
chrI	5273864	5274012	readCounts:13	950	-	5273864	5274012	0	2	50,50	0,98
chrI	5273864	5274016	readCounts:6924	950	-	5273864	5274016	0	2	50,50	0,102
chrI	5274076	5274222	readCounts:4431	950	-	5274076	5274222	0	2	50,50	0,96
chrI	5274842	5274990	readCounts:3947	950	-	5274842	5274990	0	2	50,50	0,98
chrI	5275031	5275179	readCounts:3708	950	-	5275031	5275179	0	2	50,50	0,98
chrI	5275244	5277155	readCounts:1984	950	-	5275244	5277155	0	2	50,50	0,1861
chrI	5277497	5277945	readCounts:998	950	-	5277497	5277945	0	2	50,50	0,398
chrI	5277918	5278060	readCounts:876	950	-	5277918	5278060	0	2	50,50	0,92
chrI	5278046	5278188	readCounts:870	950	-	5278046	5278188	0	2	50,50	0,92
chrI	5278046	5278194	readCounts:13	950	-	5278046	5278194	0	2	50,50	0,98
chrI	5278046	5278199	readCounts:39	950	-	5278046	5278199	0	2	50,50	0,103
chrI	5278210	5278542	readCounts:1249	950	-	5278210	5278542	0	2	50,50	0,282
chrI	5278542	5278692	readCounts:1679	950	-	5278542	5278692	0	2	50,50	0,100
chrI	5279139	5280060	readCounts:15218	950	-	5279139	5280060	0	2	50,50	0,871
chrI	5280068	5280213	readCounts:16690	950	-	5280068	5280213	0	2	50,50	0,95
chrI	5280255	5280400	readCounts:10373	950	-	5280255	5280400	0	2	50,50	0,95
chrI	5280255	5280772	readCounts:6	950	-	5280255	5280772	0	2	50,50	0,467
chrI	5280419	5280772	readCounts:7910	950	-	5280419	5280772	0	2	50,50	0,303
chrI	5280419	5281160	readCounts:8	950	-	5280419	5281160	0	2	50,50	0,691
chrI	5280822	5281160	readCounts:6387	950	-	5280822	5281160	0	2	50,50	0,288
chrI	5281174	5281321	readCounts:6442	950	-	5281174	5281321	0	2	50,50	0,97
chrI	5281311	5281455	readCounts:4816	950	-	5281311	5281455	0	2	50,50	0,94
chrI	5282321	5282704	readCounts:10095	950	-	5282321	5282704	0	2	50,50	0,333
chrI	5282699	5282842	readCounts:8440	950	-	5282699	5282842	0	2	50,50	0,93
chrI	5282699	5283239	readCounts:35	950	-	5282699	5283239	0	2	50,50	0,490
chrI	5282857	5283239	readCounts:5471	950	-	5282857	5283239	0	2	50,50	0,332
chrI	5282875	5283239	readCounts:11	950	-	5282875	5283239	0	2	50,50	0,314
chrI	5283289	5283437	readCounts:7123	950	-	5283289	5283437	0	2	50,50	0,98
chrI	5283454	5283597	readCounts:5958	950	-	5283454	5283597	0	2	50,50	0,93
chrI	5283574	5283754	readCounts:4021	950	-	5283574	5283754	0	2	50,50	0,130
chrI	5283585	5283754	readCounts:110	950	-	5283585	5283754	0	2	50,50	0,119
chrI	5283763	5283923	readCounts:3703	950	-	5283763	5283923	0	2	50,50	0,110
chrI	5283775	5283923	readCounts:11	950	-	5283775	5283923	0	2	50,50	0,98
chrI	5284640	5285268	readCounts:41184	950	-	5284640	5285268	0	2	50,50	0,578
chrI	5285335	5285512	readCounts:34087	950	-	5285335	5285512	0	2	50,50	0,127
chrI	5285518	5285666	readCounts:30	950	-	5285518	5285666	0	2	50,50	0,98
chrI	5285518	5286151	readCounts:26725	950	-	5285518	5286151	0	2	50,50	0,583
chrI	5286399	5286581	readCounts:15577	950	-	5286399	5286581	0	2	50,50	0,132
chrI	5286661	5287341	readCounts:8	950	-	5286661	5287341	0	2	50,50	0,630
chrI	5286661	5287500	readCounts:10238	950	-	5286661	5287500	0	2	50,50	0,789
chrI	5287583	5287731	readCounts:5447	950	-	5287583	5287731	0	2	50,50	0,98
chrI	5287791	5288213	readCounts:5847	950	-	5287791	5288213	0	2	50,50	0,372
chrI	5288268	5290042	readCounts:4095	950	-	5288268	5290042	0	2	50,50	0,1724
chrI	5290143	5290484	readCounts:3294	950	-	5290143	5290484	0	2	50,50	0,291
chrI	5290468	5290667	readCounts:1493	950	-	5290468	5290667	0	2	50,50	0,149
chrI	5290468	5291543	readCounts:677	950	-	5290468	5291543	0	2	50,50	0,1025
chrI	5299015	5299164	readCounts:26584	950	-	5299015	5299164	0	2	50,50	0,99
chrI	5299169	5299315	readCounts:27604	950	-	5299169	5299315	0	2	50,50	0,96
chrI	5299368	5299520	readCounts:14075	950	-	5299368	5299520	0	2	50,50	0,102
chrI	5299507	5299658	readCounts:13028	950	-	5299507	5299658	0	2	50,50	0,101
chrI	5300038	5300189	readCounts:4966	950	-	5300038	5300189	0	2	50,50	0,101
chrI	5300149	5300300	readCounts:3028	950	-	5300149	5300300	0	2	50,50	0,101
chrI	5300156	5300300	readCounts:661	950	-	5300156	5300300	0	2	50,50	0,94
chrI	5301785	5302350	readCounts:7	950	-	5301785	5302350	0	2	50,50	0,515
chrI	5301855	5302350	readCounts:11776	950	-	5301855	5302350	0	2	50,50	0,445
chrI	5302597	5302746	readCounts:5463	950	-	5302597	5302746	0	2	50,50	0,99
chrI	5302607	5302746	readCounts:525	950	-	5302607	5302746	0	2	50,50	0,89
chrI	5302758	5302908	readCounts:3602	950	-	5302758	5302908	0	2	50,50	0,100
chrI	5303118	5303334	readCounts:2342	950	-	5303118	5303334	0	2	50,50	0,166
chrI	5304298	5304490	readCounts:765	950	-	5304298	5304490	0	2	50,50	0,142
chrI	5305031	5305300	readCounts:383	950	-	5305031	5305300	0	2	50,50	0,219
chrI	5306397	5306567	readCounts:8	950	-	5306397	5306567	0	2	50,50	0,120
chrI	5306397	5309138	readCounts:154	950	-	5306397	5309138	0	2	50,50	0,2691
chrI	5309438	5309599	readCounts:133	950	-	5309438	5309599	0	2	50,50	0,111
chrI	5309690	5310112	readCounts:83	950	-	5309690	5310112	0	2	50,50	0,372
chrI	5310778	5313567	readCounts:99	950	-	5310778	5313567	0	2	50,50	0,2739
chrI	5313560	5313725	readCounts:229	950	-	5313560	5313725	0	2	50,50	0,115
chrI	5313700	5313850	readCounts:211	950	-	5313700	5313850	0	2	50,50	0,100
chrI	5313874	5317389	readCounts:41	950	-	5313874	5317389	0	2	50,50	0,3465
chrI	7202412	7202716	readCounts:12	950	-	7202412	7202716	0	2	50,50	0,254
chrI	7202421	7202622	readCounts:5	950	-	7202421	7202622	0	2	50,50	0,151
chrI	7202781	7202936	readCounts:33	950	-	7202781	7202936	0	2	50,50	0,105
chrI	7202781	7202945	readCounts:14	950	-	7202781	7202945	0	2	50,50	0,114
chrI	7202790	7202936	readCounts:2648	950	-	7202790	7202936	0	2	50,50	0,96
chrI	7203044	7203441	readCounts:1588	950	-	7203044	7203441	0	2	50,50	0,347
chrI	7204651	7204796	readCounts:15	950	-	7204651	7204796	0	2	50,50	0,95
chrI	7204651	7204800	readCounts:2882	950	-	7204651	7204800	0	2	50,50	0,99
chrI	7204780	7204939	readCounts:3229	950	-	7204780	7204939	0	2	50,50	0,109
chrI	7205007	7205152	readCounts:5	950	-	7205007	7205152	0	2	50,50	0,95
chrI	7205007	7205171	readCounts:7	950	-	7205007	7205171	0	2	50,50	0,114
chrI	7205257	7205435	readCounts:1384	950	-	7205257	7205435	0	2	50,50	0,128
chrI	7205440	7205587	readCounts:1051	950	-	7205440	7205587	0	2	50,50	0,97
chrI	7205547	7205695	readCounts:32	950	-	7205547	7205695	0	2	50,50	0,98
chrI	7205610	7205760	readCounts:569	950	-	7205610	7205760	0	2	50,50	0,100
chrI	7205764	7206097	readCounts:183	950	-	7205764	7206097	0	2	50,50	0,283
chrI	7205773	7206097	readCounts:469	950	-	7205773	7206097	0	2	50,50	0,274
chrI	7206187	7206363	readCounts:371	950	-	7206187	7206363	0	2	50,50	0,126
chrI	7206394	7206562	readCounts:161	950	-	7206394	7206562	0	2	50,50	0,118
chrI	7206672	7207009	readCounts:5	950	-	7206672	7207009	0	2	50,50	0,287
chrI	7206689	7207009	readCounts:220	950	-	7206689	7207009	0	2	50,50	0,270
chrI	7207226	7207395	readCounts:109	950	-	7207226	7207395	0	2	50,50	0,119
chrI	7207397	7207547	readCounts:93	950	-	7207397	7207547	0	2	50,50	0,100
chrI	7208477	7208889	readCounts:1900	950	-	7208477	7208889	0	2	50,50	0,362
chrI	7208477	7209439	readCounts:22	950	-	7208477	7209439	0	2	50,50	0,912
chrI	7208870	7209439	readCounts:1584	950	-	7208870	7209439	0	2	50,50	0,519
chrI	7209457	7209610	readCounts:818	950	-	7209457	7209610	0	2	50,50	0,103
chrI	7210615	7210769	readCounts:9	950	+	7210615	7210769	0	2	50,50	0,104
chrI	7210623	7210769	readCounts:1789	950	+	7210623	7210769	0	2	50,50	0,96
chrI	7210761	7211130	readCounts:1478	950	+	7210761	7211130	0	2	50,50	0,319
chrI	7210761	7211164	readCounts:10	950	+	7210761	7211164	0	2	50,50	0,353
chrI	7211205	7211355	readCounts:2949	950	+	7211205	7211355	0	2	50,50	0,100
chrI	7211492	7211676	readCounts:4284	950	+	7211492	7211676	0	2	50,50	0,134
chrI	7211492	7211719	readCounts:10	950	+	7211492	7211719	0	2	50,50	0,177
chrI	7211522	7211676	readCounts:14	950	+	7211522	7211676	0	2	50,50	0,104
chrI	7211576	7211719	readCounts:21	950	+	7211576	7211719	0	2	50,50	0,93
chrI	7211738	7211902	readCounts:14	950	+	7211738	7211902	0	2	50,50	0,114
chrI	7211738	7211965	readCounts:4559	950	+	7211738	7211965	0	2	50,50	0,177
chrI	7211977	7212131	readCounts:6066	950	+	7211977	7212131	0	2	50,50	0,104
chrI	7214923	7219367	readCounts:54	950	+	7214923	7219367	0	2	50,50	0,4394
chrI	7218593	7218835	readCounts:27	950	+	7218593	7218835	0	2	50,50	0,192
chrI	7219127	7219367	readCounts:509	950	+	7219127	7219367	0	2	50,50	0,190
chrI	7219359	7219505	readCounts:770	950	+	7219359	7219505	0	2	50,50	0,96
chrI	7219479	7219625	readCounts:985	950	+	7219479	7219625	0	2	50,50	0,96
chrI	7219646	7219812	readCounts:139	950	+	7219646	7219812	0	2	50,50	0,116
chrI	7219646	7219818	readCounts:824	950	+	7219646	7219818	0	2	50,50	0,122
chrI	7219810	7219954	readCounts:1332	950	+	7219810	7219954	0	2	50,50	0,94
chrI	7220410	7220556	readCounts:3822	950	+	7220410	7220556	0	2	50,50	0,96
chrI	7220738	7220912	readCounts:5254	950	+	7220738	7220912	0	2	50,50	0,124
chrI	7222354	7222502	readCounts:1292	950	+	7222354	7222502	0	2	50,50	0,98
chrI	7222689	7222832	readCounts:1386	950	+	7222689	7222832	0	2	50,50	0,93
chrI	7222845	7222991	readCounts:1530	950	+	7222845	7222991	0	2	50,50	0,96
chrI	7222845	7223001	readCounts:12	950	+	7222845	7223001	0	2	50,50	0,106
chrI	7223142	7223288	readCounts:2610	950	+	7223142	7223288	0	2	50,50	0,96
chrI	7223307	7223444	readCounts:7	950	+	7223307	7223444	0	2	50,50	0,87
chrI	7223307	7223451	readCounts:2932	950	+	7223307	7223451	0	2	50,50	0,94
chrI	7223440	7223583	readCounts:3639	950	+	7223440	7223583	0	2	50,50	0,93
chrI	7223440	7223593	readCounts:85	950	+	7223440	7223593	0	2	50,50	0,103
chrI	7223666	7223810	readCounts:3799	950	+	7223666	7223810	0	2	50,50	0,94
chrI	7223827	7223972	readCounts:6687	950	+	7223827	7223972	0	2	50,50	0,95
chrI	7224841	7225248	readCounts:916	950	+	7224841	7225248	0	2	50,50	0,357
chrI	7225683	7226020	readCounts:911	950	+	7225683	7226020	0	2	50,50	0,287
chrI	7226122	7226279	readCounts:1342	950	+	7226122	7226279	0	2	50,50	0,107
chrI	7226737	7226888	readCounts:5751	950	+	7226737	7226888	0	2	50,50	0,101
chrI	7226902	7227073	readCounts:44	950	+	7226902	7227073	0	2	50,50	0,121
chrI	7226902	7227082	readCounts:8796	950	+	7226902	7227082	0	2	50,50	0,130
chrI	7227090	7227256	readCounts:8946	950	+	7227090	7227256	0	2	50,50	0,116
chrI	7227898	7228050	readCounts:4459	950	+	7227898	7228050	0	2	50,50	0,102
chrI	7228016	7228400	readCounts:4721	950	+	7228016	7228400	0	2	50,50	0,334
chrI	7228016	7228878	readCounts:1221	950	+	7228016	7228878	0	2	50,50	0,812
chrI	7228498	7228878	readCounts:6307	950	+	7228498	7228878	0	2	50,50	0,330
chrI	7228498	7229051	readCounts:34	950	+	7228498	7229051	0	2	50,50	0,503
chrI	7228498	7229229	readCounts:6	950	+	7228498	7229229	0	2	50,50	0,681
chrI	7228840	7229051	readCounts:40	950	+	7228840	7229051	0	2	50,50	0,161
chrI	7228840	7229229	readCounts:15	950	+	7228840	7229229	0	2	50,50	0,339
chrI	7228986	7229229	readCounts:44	950	+	7228986	7229229	0	2	50,50	0,193
chrI	7228993	7229229	readCounts:14617	950	+	7228993	7229229	0	2	50,50	0,186
chrI	7229649	7229793	readCounts:7462	950	-	7229649	7229793	0	2	50,50	0,94
chrI	7229811	7229958	readCounts:5949	950	-	7229811	7229958	0	2	50,50	0,97
chrI	7229961	7230115	readCounts:5972	950	-	7229961	7230115	0	2	50,50	0,104
chrI	7231455	7231710	readCounts:229	950	-	7231455	7231710	0	2	50,50	0,205
chrI	7231748	7231954	readCounts:165	950	-	7231748	7231954	0	2	50,50	0,156
chrI	7231998	7232147	readCounts:186	950	-	7231998	7232147	0	2	50,50	0,99
chrI	7232164	7232312	readCounts:108	950	-	7232164	7232312	0	2	50,50	0,98
chrI	7232377	7232521	readCounts:144	950	-	7232377	7232521	0	2	50,50	0,94
chrI	7232590	7232789	readCounts:82	950	-	7232590	7232789	0	2	50,50	0,149
chrI	7232834	7232982	readCounts:191	950	-	7232834	7232982	0	2	50,50	0,98
chrI	10014532	10014781	readCounts:9598	950	+	10014532	10014781	0	2	50,50	0,199
chrI	10014819	10014943	readCounts:34	950	+	10014819	10014943	0	2	50,50	0,74
chrI	10015059	10015344	readCounts:136	950	+	10015059	10015344	0	2	50,50	0,235
chrI	10015092	10015245	readCounts:18591	950	+	10015092	10015245	0	2	50,50	0,103
chrI	10015092	10015422	readCounts:17	950	+	10015092	10015422	0	2	50,50	0,280
chrI	10015277	10015422	readCounts:15123	950	+	10015277	10015422	0	2	50,50	0,95
chrI	10016799	10016949	readCounts:1709	950	+	10016799	10016949	0	2	50,50	0,100
chrI	10016931	10017089	readCounts:2321	950	+	10016931	10017089	0	2	50,50	0,108
chrI	10017091	10017240	readCounts:1954	950	+	10017091	10017240	0	2	50,50	0,99
chrI	10017243	10017395	readCounts:2058	950	+	10017243	10017395	0	2	50,50	0,102
chrI	10017420	10017577	readCounts:2888	950	+	10017420	10017577	0	2	50,50	0,107
chrI	10017566	10017715	readCounts:3840	950	+	10017566	10017715	0	2	50,50	0,99
chrI	10017704	10017848	readCounts:4898	950	+	10017704	10017848	0	2	50,50	0,94
chrI	9668759	9668913	readCounts:15	950	-	9668759	9668913	0	2	50,50	0,104
chrI	9668765	9668913	readCounts:1961	950	-	9668765	9668913	0	2	50,50	0,98
chrI	9669051	9669236	readCounts:22	950	-	9669051	9669236	0	2	50,50	0,135
chrI	9669051	9670297	readCounts:17	950	-	9669051	9670297	0	2	50,50	0,1196
chrI	9669124	9669889	readCounts:11	950	-	9669124	9669889	0	2	50,50	0,715
chrI	9669124	9670297	readCounts:2026	950	-	9669124	9670297	0	2	50,50	0,1123
chrI	9669657	9669889	readCounts:29	950	-	9669657	9669889	0	2	50,50	0,182
chrI	9670398	9670546	readCounts:2267	950	-	9670398	9670546	0	2	50,50	0,98
chrI	9670558	9670703	readCounts:1102	950	-	9670558	9670703	0	2	50,50	0,95
chrI	9665341	9665489	readCounts:976	950	+	9665341	9665489	0	2	50,50	0,98
chrI	9665572	9665723	readCounts:1421	950	+	9665572	9665723	0	2	50,50	0,101
chrI	9665824	9666122	readCounts:1217	950	+	9665824	9666122	0	2	50,50	0,248
chrI	9666248	9666394	readCounts:2267	950	+	9666248	9666394	0	2	50,50	0,96
chrI	9666422	9666569	readCounts:3836	950	+	9666422	9666569	0	2	50,50	0,97
chrI	9666597	9666747	readCounts:3552	950	+	9666597	9666747	0	2	50,50	0,100
chrI	9666792	9666936	readCounts:4616	950	+	9666792	9666936	0	2	50,50	0,94
chrI	9666902	9667047	readCounts:6006	950	+	9666902	9667047	0	2	50,50	0,95
chrI	9667184	9667334	readCounts:7510	950	+	9667184	9667334	0	2	50,50	0,100
chrI	9667184	9667337	readCounts:8	950	+	9667184	9667337	0	2	50,50	0,103
chrI	9667320	9667455	readCounts:7	950	+	9667320	9667455	0	2	50,50	0,85
chrI	9667320	9667473	readCounts:8733	950	+	9667320	9667473	0	2	50,50	0,103
chrI	9667475	9667699	readCounts:7	950	+	9667475	9667699	0	2	50,50	0,174
chrI	9667527	9667699	readCounts:11425	950	+	9667527	9667699	0	2	50,50	0,122
chrI	9667686	9668368	readCounts:15	950	+	9667686	9668368	0	2	50,50	0,632
chrI	9667718	9668368	readCounts:16245	950	+	9667718	9668368	0	2	50,50	0,600
chrI	9660692	9660843	readCounts:22795	950	-	9660692	9660843	0	2	50,50	0,101
chrI	9661348	9661587	readCounts:4622	950	-	9661348	9661587	0	2	50,50	0,189
chrI	9662586	9662734	readCounts:651	950	-	9662586	9662734	0	2	50,50	0,98
chrI	9663451	9663599	readCounts:222	950	-	9663451	9663599	0	2	50,50	0,98
chrI	9663617	9663787	readCounts:294	950	-	9663617	9663787	0	2	50,50	0,120
chrI	9664633	9664777	readCounts:56	950	-	9664633	9664777	0	2	50,50	0,94
chrI	9658335	9658478	readCounts:3064	950	+	9658335	9658478	0	2	50,50	0,93
chrI	9658481	9658625	readCounts:19	950	+	9658481	9658625	0	2	50,50	0,94
chrI	9658671	9659398	readCounts:6930	950	+	9658671	9659398	0	2	50,50	0,677
chrI	9659469	9659618	readCounts:16085	950	+	9659469	9659618	0	2	50,50	0,99
chrI	9659473	9659618	readCounts:22	950	+	9659473	9659618	0	2	50,50	0,95
chrI	9659669	9659866	readCounts:10010	950	+	9659669	9659866	0	2	50,50	0,147
chrI	9657320	9657471	readCounts:26746	950	-	9657320	9657471	0	2	50,50	0,101
chrI	9657494	9657640	readCounts:25853	950	-	9657494	9657640	0	2	50,50	0,96
chrI	9657640	9657786	readCounts:17646	950	-	9657640	9657786	0	2	50,50	0,96
chrI	9669451	9669606	readCounts:48647	950	+	9669451	9669606	0	2	50,50	0,105
chrI	9669733	9669879	readCounts:82211	950	+	9669733	9669879	0	2	50,50	0,96
chrI	9669733	9669919	readCounts:197	950	+	9669733	9669919	0	2	50,50	0,136
chrI	5726498	5727077	readCounts:9	950	-	5726498	5727077	0	2	50,50	0,529
chrI	5726498	5727191	readCounts:4114	950	-	5726498	5727191	0	2	50,50	0,643
chrI	5726498	5727283	readCounts:10	950	-	5726498	5727283	0	2	50,50	0,735
chrI	5726498	5728037	readCounts:7	950	-	5726498	5728037	0	2	50,50	0,1489
chrI	5726958	5727110	readCounts:10	950	-	5726958	5727110	0	2	50,50	0,102
chrI	5726965	5727110	readCounts:9	950	-	5726965	5727110	0	2	50,50	0,95
chrI	5727214	5727360	readCounts:5397	950	-	5727214	5727360	0	2	50,50	0,96
chrI	5727331	5728037	readCounts:4610	950	-	5727331	5728037	0	2	50,50	0,656
chrI	5728079	5728536	readCounts:93	950	-	5728079	5728536	0	2	50,50	0,407
chrI	5728088	5728536	readCounts:5012	950	-	5728088	5728536	0	2	50,50	0,398
chrI	5728511	5728818	readCounts:3902	950	-	5728511	5728818	0	2	50,50	0,257
chrI	5728838	5728987	readCounts:2637	950	-	5728838	5728987	0	2	50,50	0,99
chrI	5729031	5729239	readCounts:2081	950	-	5729031	5729239	0	2	50,50	0,158
chrI	5716761	5718574	readCounts:302	950	+	5716761	5718574	0	2	50,50	0,1763
chrI	5718522	5718668	readCounts:698	950	+	5718522	5718668	0	2	50,50	0,96
chrI	5718633	5719961	readCounts:803	950	+	5718633	5719961	0	2	50,50	0,1278
chrI	5719436	5719961	readCounts:8	950	+	5719436	5719961	0	2	50,50	0,475
chrI	5719947	5720922	readCounts:1115	950	+	5719947	5720922	0	2	50,50	0,925
chrI	5720970	5721218	readCounts:1282	950	+	5720970	5721218	0	2	50,50	0,198
chrI	5720970	5721294	readCounts:5	950	+	5720970	5721294	0	2	50,50	0,274
chrI	5721324	5721735	readCounts:1398	950	+	5721324	5721735	0	2	50,50	0,361
chrI	5721954	5724847	readCounts:1328	950	+	5721954	5724847	0	2	50,50	0,2843
chrI	5721954	5725220	readCounts:12	950	+	5721954	5725220	0	2	50,50	0,3216
chrI	5723883	5724847	readCounts:11	950	+	5723883	5724847	0	2	50,50	0,914
chrI	5724912	5725220	readCounts:2002	950	+	5724912	5725220	0	2	50,50	0,258
chrI	9673925	9674075	readCounts:7126	950	-	9673925	9674075	0	2	50,50	0,100
chrI	9674267	9674715	readCounts:2421	950	-	9674267	9674715	0	2	50,50	0,398
chrI	9674273	9674715	readCounts:1050	950	-	9674273	9674715	0	2	50,50	0,392
chrI	9674955	9675457	readCounts:2127	950	-	9674955	9675457	0	2	50,50	0,452
chrI	9675472	9675772	readCounts:2011	950	-	9675472	9675772	0	2	50,50	0,250
chrI	9675751	9675910	readCounts:7	950	-	9675751	9675910	0	2	50,50	0,109
chrI	9675759	9675910	readCounts:1373	950	-	9675759	9675910	0	2	50,50	0,101
chrI	9675965	9676111	readCounts:840	950	-	9675965	9676111	0	2	50,50	0,96
chrI	9676254	9676399	readCounts:414	950	-	9676254	9676399	0	2	50,50	0,95
chrI	9676868	9677105	readCounts:181	950	-	9676868	9677105	0	2	50,50	0,187
chrI	9677836	9678463	readCounts:81	950	-	9677836	9678463	0	2	50,50	0,577
chrI	9711379	9711989	readCounts:5	950	-	9711379	9711989	0	2	50,50	0,560
chrI	9711465	9711610	readCounts:34654	950	-	9711465	9711610	0	2	50,50	0,95
chrI	9711465	9711724	readCounts:12	950	-	9711465	9711724	0	2	50,50	0,209
chrI	9711578	9711720	readCounts:10	950	-	9711578	9711720	0	2	50,50	0,92
chrI	9711578	9711724	readCounts:34594	950	-	9711578	9711724	0	2	50,50	0,96
chrI	9712345	9712491	readCounts:7056	950	-	9712345	9712491	0	2	50,50	0,96
chrI	9712533	9712679	readCounts:5043	950	-	9712533	9712679	0	2	50,50	0,96
chrI	9694985	9695198	readCounts:6	950	-	9694985	9695198	0	2	50,50	0,163
chrI	9694995	9695138	readCounts:920	950	-	9694995	9695138	0	2	50,50	0,93
chrI	9694995	9695193	readCounts:5	950	-	9694995	9695193	0	2	50,50	0,148
chrI	9694995	9695198	readCounts:2825	950	-	9694995	9695198	0	2	50,50	0,153
chrI	9704964	9705168	readCounts:24459	950	+	9704964	9705168	0	2	50,50	0,154
chrI	9685575	9686221	readCounts:318	950	+	9685575	9686221	0	2	50,50	0,596
chrI	9686245	9686394	readCounts:445	950	+	9686245	9686394	0	2	50,50	0,99
chrI	9686377	9686620	readCounts:641	950	+	9686377	9686620	0	2	50,50	0,193
chrI	9686768	9686918	readCounts:947	950	+	9686768	9686918	0	2	50,50	0,100
chrI	9686901	9687310	readCounts:1317	950	+	9686901	9687310	0	2	50,50	0,359
chrI	9687344	9687500	readCounts:1679	950	+	9687344	9687500	0	2	50,50	0,106
chrI	9687348	9687500	readCounts:20	950	+	9687348	9687500	0	2	50,50	0,102
chrI	9687670	9687817	readCounts:2287	950	+	9687670	9687817	0	2	50,50	0,97
chrI	9688063	9688208	readCounts:3591	950	+	9688063	9688208	0	2	50,50	0,95
chrI	9689256	9689561	readCounts:12	950	+	9689256	9689561	0	2	50,50	0,255
chrI	9689256	9689702	readCounts:2055979	950	+	9689256	9689702	0	2	50,50	0,396
chrI	9689256	9689756	readCounts:5	950	+	9689256	9689756	0	2	50,50	0,450
chrI	9689256	9689765	readCounts:32	950	+	9689256	9689765	0	2	50,50	0,459
chrI	9689256	9689840	readCounts:13	950	+	9689256	9689840	0	2	50,50	0,534
chrI	9689713	9689858	readCounts:22	950	+	9689713	9689858	0	2	50,50	0,95
chrI	9689740	9689997	readCounts:3298	950	+	9689740	9689997	0	2	50,50	0,207
chrI	9689770	9690030	readCounts:40510	950	+	9689770	9690030	0	2	50,50	0,210
chrI	9689797	9689988	readCounts:2561426	950	+	9689797	9689988	0	2	50,50	0,141
chrI	9689797	9689990	readCounts:102	950	+	9689797	9689990	0	2	50,50	0,143
chrI	9689797	9689992	readCounts:5	950	+	9689797	9689992	0	2	50,50	0,145
chrI	9689797	9690012	readCounts:54	950	+	9689797	9690012	0	2	50,50	0,165
chrI	9689801	9689992	readCounts:5	950	+	9689801	9689992	0	2	50,50	0,141
chrI	9690335	9690487	readCounts:5	950	-	9690335	9690487	0	2	50,50	0,102
chrI	9690340	9690487	readCounts:20858	950	-	9690340	9690487	0	2	50,50	0,97
chrI	9692740	9692887	readCounts:1427	950	-	9692740	9692887	0	2	50,50	0,97
chrI	9693502	9693741	readCounts:193	950	-	9693502	9693741	0	2	50,50	0,189
chrI	9693508	9693741	readCounts:1966	950	-	9693508	9693741	0	2	50,50	0,183
chrI	9695883	9696043	readCounts:7	950	-	9695883	9696043	0	2	50,50	0,110
chrI	9695894	9696039	readCounts:22	950	-	9695894	9696039	0	2	50,50	0,95
chrI	9695894	9696043	readCounts:148416	950	-	9695894	9696043	0	2	50,50	0,99
chrI	9696101	9696246	readCounts:7	950	-	9696101	9696246	0	2	50,50	0,95
chrI	9696212	9696621	readCounts:86315	950	-	9696212	9696621	0	2	50,50	0,359
chrI	9696222	9696621	readCounts:14	950	-	9696222	9696621	0	2	50,50	0,349
chrI	9697751	9698201	readCounts:4083	950	-	9697751	9698201	0	2	50,50	0,400
chrI	9698460	9699176	readCounts:2275	950	-	9698460	9699176	0	2	50,50	0,666
chrI	9699171	9699448	readCounts:1607	950	-	9699171	9699448	0	2	50,50	0,227
chrI	9710160	9710329	readCounts:4762	950	-	9710160	9710329	0	2	50,50	0,119
chrI	9710418	9710565	readCounts:7374	950	-	9710418	9710565	0	2	50,50	0,97
chrI	9710557	9710705	readCounts:6450	950	-	9710557	9710705	0	2	50,50	0,98
chrI	6012203	6012357	readCounts:44	950	+	6012203	6012357	0	2	50,50	0,104
chrI	6012520	6012678	readCounts:20	950	+	6012520	6012678	0	2	50,50	0,108
chrI	6012943	6013268	readCounts:41	950	+	6012943	6013268	0	2	50,50	0,275
chrI	6013835	6014196	readCounts:83	950	+	6013835	6014196	0	2	50,50	0,311
chrI	6014498	6014967	readCounts:41	950	+	6014498	6014967	0	2	50,50	0,419
chrI	6015367	6015753	readCounts:52	950	+	6015367	6015753	0	2	50,50	0,336
chrI	6015939	6016378	readCounts:57	950	+	6015939	6016378	0	2	50,50	0,389
chrI	6016608	6017086	readCounts:96	950	+	6016608	6017086	0	2	50,50	0,428
chrI	6017268	6017677	readCounts:194	950	+	6017268	6017677	0	2	50,50	0,359
chrI	6017802	6018117	readCounts:178	950	+	6017802	6018117	0	2	50,50	0,265
chrI	6018329	6018638	readCounts:252	950	+	6018329	6018638	0	2	50,50	0,259
chrI	6018724	6019251	readCounts:336	950	+	6018724	6019251	0	2	50,50	0,477
chrI	6019751	6019902	readCounts:1902	950	+	6019751	6019902	0	2	50,50	0,101
chrI	6019856	6020128	readCounts:2106	950	+	6019856	6020128	0	2	50,50	0,222
chrI	6020161	6020546	readCounts:2854	950	+	6020161	6020546	0	2	50,50	0,335
chrI	6020888	6021101	readCounts:6149	950	+	6020888	6021101	0	2	50,50	0,163
chrI	6021065	6021316	readCounts:5	950	+	6021065	6021316	0	2	50,50	0,201
chrI	6021065	6021363	readCounts:4966	950	+	6021065	6021363	0	2	50,50	0,248
chrI	6021491	6021913	readCounts:6029	950	+	6021491	6021913	0	2	50,50	0,372
chrI	5990760	5991207	readCounts:2812	950	+	5990760	5991207	0	2	50,50	0,397
chrI	5991314	5991470	readCounts:5469	950	+	5991314	5991470	0	2	50,50	0,106
chrI	5991499	5991643	readCounts:150	950	+	5991499	5991643	0	2	50,50	0,94
chrI	5991543	5991699	readCounts:5	950	+	5991543	5991699	0	2	50,50	0,106
chrI	5991543	5991987	readCounts:6566	950	+	5991543	5991987	0	2	50,50	0,394
chrI	5991594	5991987	readCounts:9	950	+	5991594	5991987	0	2	50,50	0,343
chrI	5991656	5991987	readCounts:817	950	+	5991656	5991987	0	2	50,50	0,281
chrI	5992185	5992543	readCounts:5423	950	+	5992185	5992543	0	2	50,50	0,308
chrI	6004873	6005176	readCounts:20	950	-	6004873	6005176	0	2	50,50	0,253
chrI	6004873	6007418	readCounts:2558	950	-	6004873	6007418	0	2	50,50	0,2495
chrI	6007394	6007537	readCounts:28	950	-	6007394	6007537	0	2	50,50	0,93
chrI	6007394	6007547	readCounts:2356	950	-	6007394	6007547	0	2	50,50	0,103
chrI	6006612	6006869	readCounts:3561	950	+	6006612	6006869	0	2	50,50	0,207
chrI	6006851	6007003	readCounts:3916	950	+	6006851	6007003	0	2	50,50	0,102
chrI	6006860	6007003	readCounts:12	950	+	6006860	6007003	0	2	50,50	0,93
chrI	6007032	6007207	readCounts:3849	950	+	6007032	6007207	0	2	50,50	0,125
chrI	6007032	6007214	readCounts:75	950	+	6007032	6007214	0	2	50,50	0,132
chrI	5986545	5986771	readCounts:295	950	+	5986545	5986771	0	2	50,50	0,176
chrI	5987033	5987400	readCounts:430	950	+	5987033	5987400	0	2	50,50	0,317
chrI	5988156	5988674	readCounts:1476	950	+	5988156	5988674	0	2	50,50	0,468
chrI	5988711	5988871	readCounts:671	950	+	5988711	5988871	0	2	50,50	0,110
chrI	5988711	5988880	readCounts:1044	950	+	5988711	5988880	0	2	50,50	0,119
chrI	5988882	5989059	readCounts:2428	950	+	5988882	5989059	0	2	50,50	0,127
chrI	5989105	5989246	readCounts:140	950	+	5989105	5989246	0	2	50,50	0,91
chrI	5989105	5989253	readCounts:2618	950	+	5989105	5989253	0	2	50,50	0,98
chrI	5989432	5989981	readCounts:8195	950	+	5989432	5989981	0	2	50,50	0,499
chrI	5990048	5990217	readCounts:22	950	+	5990048	5990217	0	2	50,50	0,119
chrI	5990071	5990217	readCounts:6669	950	+	5990071	5990217	0	2	50,50	0,96
chrI	5981894	5982041	readCounts:1972	950	-	5981894	5982041	0	2	50,50	0,97
chrI	5981987	5982130	readCounts:16	950	-	5981987	5982130	0	2	50,50	0,93
chrI	5982044	5982193	readCounts:2816	950	-	5982044	5982193	0	2	50,50	0,99
chrI	5982232	5982381	readCounts:4547	950	-	5982232	5982381	0	2	50,50	0,99
chrI	5982232	5982384	readCounts:17	950	-	5982232	5982384	0	2	50,50	0,102
chrI	5982232	5982388	readCounts:24	950	-	5982232	5982388	0	2	50,50	0,106
chrI	5982427	5982578	readCounts:396	950	-	5982427	5982578	0	2	50,50	0,101
chrI	5982427	5982583	readCounts:4583	950	-	5982427	5982583	0	2	50,50	0,106
chrI	5982447	5982583	readCounts:15	950	-	5982447	5982583	0	2	50,50	0,86
chrI	5982602	5983384	readCounts:1456	950	-	5982602	5983384	0	2	50,50	0,732
chrI	5982938	5983384	readCounts:71	950	-	5982938	5983384	0	2	50,50	0,396
chrI	5983373	5983539	readCounts:98	950	-	5983373	5983539	0	2	50,50	0,116
chrI	5983385	5983539	readCounts:8863	950	-	5983385	5983539	0	2	50,50	0,104
chrI	5983576	5983819	readCounts:6071	950	-	5983576	5983819	0	2	50,50	0,193
chrI	5983861	5984010	readCounts:5159	950	-	5983861	5984010	0	2	50,50	0,99
chrI	5984014	5984175	readCounts:57	950	-	5984014	5984175	0	2	50,50	0,111
chrI	5984029	5984175	readCounts:3285	950	-	5984029	5984175	0	2	50,50	0,96
chrI	5984704	5984854	readCounts:1438	950	-	5984704	5984854	0	2	50,50	0,100
chrI	5985419	5985565	readCounts:486	950	-	5985419	5985565	0	2	50,50	0,96
chrI	5985605	5985755	readCounts:413	950	-	5985605	5985755	0	2	50,50	0,100
chrI	5993288	5994096	readCounts:22392	950	-	5993288	5994096	0	2	50,50	0,758
chrI	5994144	5994967	readCounts:17483	950	-	5994144	5994967	0	2	50,50	0,773
chrI	5995011	5995276	readCounts:15136	950	-	5995011	5995276	0	2	50,50	0,215
chrI	5995272	5995426	readCounts:10007	950	-	5995272	5995426	0	2	50,50	0,104
chrI	5995393	5995700	readCounts:10189	950	-	5995393	5995700	0	2	50,50	0,257
chrI	5995763	5995944	readCounts:7956	950	-	5995763	5995944	0	2	50,50	0,131
chrI	5996166	5998627	readCounts:3807	950	-	5996166	5998627	0	2	50,50	0,2411
chrI	5998605	5998759	readCounts:1360	950	-	5998605	5998759	0	2	50,50	0,104
chrI	5998614	5998759	readCounts:1662	950	-	5998614	5998759	0	2	50,50	0,95
chrI	5998753	5999144	readCounts:861	950	-	5998753	5999144	0	2	50,50	0,341
chrI	5998753	6000804	readCounts:1136	950	-	5998753	6000804	0	2	50,50	0,2001
chrI	6000836	6003287	readCounts:83	950	-	6000836	6003287	0	2	50,50	0,2401
chrI	6008280	6008545	readCounts:5660	950	-	6008280	6008545	0	2	50,50	0,215
chrI	6008280	6008568	readCounts:12	950	-	6008280	6008568	0	2	50,50	0,238
chrI	6008687	6008841	readCounts:6	950	-	6008687	6008841	0	2	50,50	0,104
chrI	6008690	6008841	readCounts:4135	950	-	6008690	6008841	0	2	50,50	0,101
chrI	6008939	6009165	readCounts:2448	950	-	6008939	6009165	0	2	50,50	0,176
chrI	6009240	6009390	readCounts:2140	950	-	6009240	6009390	0	2	50,50	0,100
chrI	6009366	6009519	readCounts:7	950	-	6009366	6009519	0	2	50,50	0,103
chrI	6009370	6009519	readCounts:1780	950	-	6009370	6009519	0	2	50,50	0,99
chrI	6009989	6010158	readCounts:10024	950	-	6009989	6010158	0	2	50,50	0,119
chrI	6010002	6010158	readCounts:13	950	-	6010002	6010158	0	2	50,50	0,106
chrI	6010160	6010306	readCounts:9278	950	-	6010160	6010306	0	2	50,50	0,96
chrI	6010293	6010441	readCounts:9584	950	-	6010293	6010441	0	2	50,50	0,98
chrI	6010391	6010572	readCounts:88	950	-	6010391	6010572	0	2	50,50	0,131
chrI	6010403	6010572	readCounts:5	950	-	6010403	6010572	0	2	50,50	0,119
chrI	6010425	6010572	readCounts:7267	950	-	6010425	6010572	0	2	50,50	0,97
chrI	6010589	6010733	readCounts:5254	950	-	6010589	6010733	0	2	50,50	0,94
chrI	6010776	6010926	readCounts:3413	950	-	6010776	6010926	0	2	50,50	0,100
chrI	6010776	6011164	readCounts:38	950	-	6010776	6011164	0	2	50,50	0,338
chrI	6010776	6011251	readCounts:11	950	-	6010776	6011251	0	2	50,50	0,425
chrI	6011018	6011164	readCounts:2027	950	-	6011018	6011164	0	2	50,50	0,96
chrI	6011239	6011387	readCounts:1763	950	-	6011239	6011387	0	2	50,50	0,98
chrI	6011361	6011513	readCounts:1084	950	-	6011361	6011513	0	2	50,50	0,102
chrI	444059	444303	readCounts:29	950	+	444059	444303	0	2	50,50	0,194
chrI	444326	445043	readCounts:29	950	+	444326	445043	0	2	50,50	0,667
chrI	445034	446757	readCounts:62	950	+	445034	446757	0	2	50,50	0,1673
chrI	446732	446963	readCounts:110	950	+	446732	446963	0	2	50,50	0,181
chrI	447001	450246	readCounts:126	950	+	447001	450246	0	2	50,50	0,3195
chrI	450256	450531	readCounts:135	950	+	450256	450531	0	2	50,50	0,225
chrI	450709	451344	readCounts:191	950	+	450709	451344	0	2	50,50	0,585
chrI	451411	455405	readCounts:118	950	+	451411	455405	0	2	50,50	0,3944
chrI	455441	455595	readCounts:156	950	+	455441	455595	0	2	50,50	0,104
chrI	455671	456905	readCounts:265	950	+	455671	456905	0	2	50,50	0,1184
chrI	456944	457285	readCounts:161	950	+	456944	457285	0	2	50,50	0,291
chrI	458571	459618	readCounts:3075	950	+	458571	459618	0	2	50,50	0,997
chrI	458571	460999	readCounts:110	950	+	458571	460999	0	2	50,50	0,2378
chrI	460012	460999	readCounts:9206	950	+	460012	460999	0	2	50,50	0,937
chrI	420982	421148	readCounts:69	950	+	420982	421148	0	2	50,50	0,116
chrI	421171	421614	readCounts:132	950	+	421171	421614	0	2	50,50	0,393
chrI	422132	422342	readCounts:576	950	+	422132	422342	0	2	50,50	0,160
chrI	422443	422588	readCounts:501	950	+	422443	422588	0	2	50,50	0,95
chrI	422638	422788	readCounts:727	950	+	422638	422788	0	2	50,50	0,100
chrI	422843	423550	readCounts:645	950	+	422843	423550	0	2	50,50	0,657
chrI	4035892	4036678	readCounts:154	950	+	4035892	4036678	0	2	50,50	0,736
chrI	4036852	4036996	readCounts:221	950	+	4036852	4036996	0	2	50,50	0,94
chrI	4037033	4038539	readCounts:151	950	+	4037033	4038539	0	2	50,50	0,1456
chrI	4038610	4038759	readCounts:147	950	+	4038610	4038759	0	2	50,50	0,99
chrI	4038822	4044849	readCounts:81	950	+	4038822	4044849	0	2	50,50	0,5977
chrI	4044931	4045074	readCounts:84	950	+	4044931	4045074	0	2	50,50	0,93
chrI	4045053	4045545	readCounts:165	950	+	4045053	4045545	0	2	50,50	0,442
chrI	4045666	4046069	readCounts:80	950	+	4045666	4046069	0	2	50,50	0,353
chrI	4046052	4047299	readCounts:152	950	+	4046052	4047299	0	2	50,50	0,1197
chrI	4046052	4048014	readCounts:12	950	+	4046052	4048014	0	2	50,50	0,1912
chrI	4047164	4048014	readCounts:103	950	+	4047164	4048014	0	2	50,50	0,800
chrI	4047337	4048014	readCounts:304	950	+	4047337	4048014	0	2	50,50	0,627
chrI	4048025	4048173	readCounts:288	950	+	4048025	4048173	0	2	50,50	0,98
chrI	4048300	4048955	readCounts:175	950	+	4048300	4048955	0	2	50,50	0,605
chrI	4049599	4050021	readCounts:219	950	+	4049599	4050021	0	2	50,50	0,372
chrI	4049990	4050142	readCounts:432	950	+	4049990	4050142	0	2	50,50	0,102
chrI	4050258	4052004	readCounts:257	950	+	4050258	4052004	0	2	50,50	0,1696
chrI	4052092	4052505	readCounts:548	950	+	4052092	4052505	0	2	50,50	0,363
chrI	4052889	4053447	readCounts:243	950	+	4052889	4053447	0	2	50,50	0,508
chrI	4053533	4054525	readCounts:174	950	+	4053533	4054525	0	2	50,50	0,942
chrI	4053533	4055440	readCounts:35	950	+	4053533	4055440	0	2	50,50	0,1857
chrI	4053533	4058585	readCounts:168	950	+	4053533	4058585	0	2	50,50	0,5002
chrI	4054491	4055440	readCounts:124	950	+	4054491	4055440	0	2	50,50	0,899
chrI	4057194	4058585	readCounts:312	950	+	4057194	4058585	0	2	50,50	0,1341
chrI	4058842	4059028	readCounts:156	950	+	4058842	4059028	0	2	50,50	0,136
chrI	4060160	4060315	readCounts:504	950	+	4060160	4060315	0	2	50,50	0,105
chrI	4060357	4062353	readCounts:20	950	+	4060357	4062353	0	2	50,50	0,1946
chrI	4062076	4062353	readCounts:226	950	+	4062076	4062353	0	2	50,50	0,227
chrI	4062410	4062724	readCounts:323	950	+	4062410	4062724	0	2	50,50	0,264
chrI	4062410	4064969	readCounts:12	950	+	4062410	4064969	0	2	50,50	0,2509
chrI	4064784	4064969	readCounts:520	950	+	4064784	4064969	0	2	50,50	0,135
chrI	4066569	4066963	readCounts:16	950	+	4066569	4066963	0	2	50,50	0,344
chrI	4070934	4071084	readCounts:1613	950	+	4070934	4071084	0	2	50,50	0,100
chrI	4071228	4071382	readCounts:2136	950	+	4071228	4071382	0	2	50,50	0,104
chrI	4071612	4073587	readCounts:3497	950	+	4071612	4073587	0	2	50,50	0,1925
chrI	4073591	4075302	readCounts:3672	950	+	4073591	4075302	0	2	50,50	0,1661
chrI	4075477	4075675	readCounts:5101	950	+	4075477	4075675	0	2	50,50	0,148
chrI	4076660	4077226	readCounts:41338	950	+	4076660	4077226	0	2	50,50	0,516
chrI	4077239	4077444	readCounts:48016	950	+	4077239	4077444	0	2	50,50	0,155
chrI	4077513	4078073	readCounts:71655	950	+	4077513	4078073	0	2	50,50	0,510
chrI	4077513	4078079	readCounts:742	950	+	4077513	4078079	0	2	50,50	0,516
chrI	4077517	4078073	readCounts:20	950	+	4077517	4078073	0	2	50,50	0,506
chrI	4078073	4078500	readCounts:11	950	+	4078073	4078500	0	2	50,50	0,377
chrI	4078073	4079574	readCounts:446	950	+	4078073	4079574	0	2	50,50	0,1451
chrI	4079666	4080355	readCounts:361	950	+	4079666	4080355	0	2	50,50	0,639
chrI	4079666	4081985	readCounts:237	950	+	4079666	4081985	0	2	50,50	0,2269
chrI	4081574	4081985	readCounts:25	950	+	4081574	4081985	0	2	50,50	0,361
chrI	4082242	4082451	readCounts:308	950	+	4082242	4082451	0	2	50,50	0,159
chrI	4082616	4083063	readCounts:225	950	+	4082616	4083063	0	2	50,50	0,397
chrI	4083250	4083873	readCounts:592	950	+	4083250	4083873	0	2	50,50	0,573
chrI	4083895	4084114	readCounts:542	950	+	4083895	4084114	0	2	50,50	0,169
chrI	4084418	4085074	readCounts:744	950	+	4084418	4085074	0	2	50,50	0,606
chrI	4085175	4086705	readCounts:1077	950	+	4085175	4086705	0	2	50,50	0,1480
chrI	4087133	4087506	readCounts:877	950	+	4087133	4087506	0	2	50,50	0,323
chrI	4087728	4088203	readCounts:1910	950	+	4087728	4088203	0	2	50,50	0,425
chrI	4088888	4089344	readCounts:8677	950	+	4088888	4089344	0	2	50,50	0,406
chrI	4089573	4089731	readCounts:17739	950	+	4089573	4089731	0	2	50,50	0,108
chrI	4089850	4089996	readCounts:44099	950	+	4089850	4089996	0	2	50,50	0,96
chrI	4090136	4090377	readCounts:73698	950	+	4090136	4090377	0	2	50,50	0,191
chrI	4071909	4072062	readCounts:1089	950	-	4071909	4072062	0	2	50,50	0,103
chrI	4072124	4072435	readCounts:912	950	-	4072124	4072435	0	2	50,50	0,261
chrI	4072124	4072709	readCounts:19	950	-	4072124	4072709	0	2	50,50	0,535
chrI	4072888	4073039	readCounts:267	950	-	4072888	4073039	0	2	50,50	0,101
chrI	5497911	5498899	readCounts:437	950	+	5497911	5498899	0	2	50,50	0,938
chrI	5498505	5498899	readCounts:258	950	+	5498505	5498899	0	2	50,50	0,344
chrI	5498946	5499219	readCounts:1095	950	+	5498946	5499219	0	2	50,50	0,223
chrI	5499332	5499935	readCounts:2509	950	+	5499332	5499935	0	2	50,50	0,553
chrI	5499332	5499973	readCounts:25	950	+	5499332	5499973	0	2	50,50	0,591
chrI	5499979	5500134	readCounts:33	950	+	5499979	5500134	0	2	50,50	0,105
chrI	5499984	5500134	readCounts:1457	950	+	5499984	5500134	0	2	50,50	0,100
chrI	5500103	5501579	readCounts:1686	950	+	5500103	5501579	0	2	50,50	0,1426
chrI	5500972	5501579	readCounts:28	950	+	5500972	5501579	0	2	50,50	0,557
chrI	5501160	5501579	readCounts:29	950	+	5501160	5501579	0	2	50,50	0,369
chrI	5501577	5501722	readCounts:4010	950	+	5501577	5501722	0	2	50,50	0,95
chrI	5501907	5502063	readCounts:4731	950	+	5501907	5502063	0	2	50,50	0,106
chrI	5501911	5502063	readCounts:10	950	+	5501911	5502063	0	2	50,50	0,102
chrI	5502099	5503107	readCounts:6	950	+	5502099	5503107	0	2	50,50	0,958
chrI	5502104	5503107	readCounts:4515	950	+	5502104	5503107	0	2	50,50	0,953
chrI	5502104	5503231	readCounts:23	950	+	5502104	5503231	0	2	50,50	0,1077
chrI	5502216	5503107	readCounts:5	950	+	5502216	5503107	0	2	50,50	0,841
chrI	5503057	5503231	readCounts:6	950	+	5503057	5503231	0	2	50,50	0,124
chrI	5503078	5503231	readCounts:6203	950	+	5503078	5503231	0	2	50,50	0,103
chrI	5503343	5503553	readCounts:7967	950	+	5503343	5503553	0	2	50,50	0,160
chrI	5503559	5503704	readCounts:9	950	+	5503559	5503704	0	2	50,50	0,95
chrI	5503559	5504302	readCounts:9539	950	+	5503559	5504302	0	2	50,50	0,693
chrI	5503640	5504302	readCounts:12	950	+	5503640	5504302	0	2	50,50	0,612
chrI	5504314	5504485	readCounts:54	950	+	5504314	5504485	0	2	50,50	0,121
chrI	5504314	5504969	readCounts:9110	950	+	5504314	5504969	0	2	50,50	0,605
chrI	5504511	5504969	readCounts:20	950	+	5504511	5504969	0	2	50,50	0,408
chrI	5504521	5504969	readCounts:5	950	+	5504521	5504969	0	2	50,50	0,398
chrI	5504769	5504969	readCounts:7	950	+	5504769	5504969	0	2	50,50	0,150
chrI	5504928	5505078	readCounts:9755	950	+	5504928	5505078	0	2	50,50	0,100
chrI	5491717	5492233	readCounts:6116	950	+	5491717	5492233	0	2	50,50	0,466
chrI	5492238	5492508	readCounts:9966	950	+	5492238	5492508	0	2	50,50	0,220
chrI	5492513	5492667	readCounts:12040	950	+	5492513	5492667	0	2	50,50	0,104
chrI	5492519	5492667	readCounts:38	950	+	5492519	5492667	0	2	50,50	0,98
chrI	5492657	5492990	readCounts:13384	950	+	5492657	5492990	0	2	50,50	0,283
chrI	5492973	5493120	readCounts:11552	950	+	5492973	5493120	0	2	50,50	0,97
chrI	5488355	5488630	readCounts:3205	950	+	5488355	5488630	0	2	50,50	0,225
chrI	5488592	5488745	readCounts:4117	950	+	5488592	5488745	0	2	50,50	0,103
chrI	5488902	5489305	readCounts:7074	950	+	5488902	5489305	0	2	50,50	0,353
chrI	5489320	5489498	readCounts:7710	950	+	5489320	5489498	0	2	50,50	0,128
chrI	5490010	5490246	readCounts:19313	950	+	5490010	5490246	0	2	50,50	0,186
chrI	5490297	5490451	readCounts:87	950	+	5490297	5490451	0	2	50,50	0,104
chrI	5490303	5490451	readCounts:19753	950	+	5490303	5490451	0	2	50,50	0,98
chrI	5479969	5480268	readCounts:19492	950	-	5479969	5480268	0	2	50,50	0,249
chrI	5480290	5480769	readCounts:17259	950	-	5480290	5480769	0	2	50,50	0,429
chrI	5480757	5480900	readCounts:7	950	-	5480757	5480900	0	2	50,50	0,93
chrI	5480757	5480904	readCounts:16523	950	-	5480757	5480904	0	2	50,50	0,97
chrI	5480938	5481092	readCounts:8747	950	-	5480938	5481092	0	2	50,50	0,104
chrI	5481169	5481661	readCounts:4850	950	-	5481169	5481661	0	2	50,50	0,442
chrI	5481799	5481942	readCounts:3278	950	-	5481799	5481942	0	2	50,50	0,93
chrI	5481970	5482116	readCounts:1854	950	-	5481970	5482116	0	2	50,50	0,96
chrI	5482207	5482362	readCounts:1653	950	-	5482207	5482362	0	2	50,50	0,105
chrI	5482369	5482515	readCounts:1087	950	-	5482369	5482515	0	2	50,50	0,96
chrI	5482599	5482746	readCounts:767	950	-	5482599	5482746	0	2	50,50	0,97
chrI	5482605	5482746	readCounts:246	950	-	5482605	5482746	0	2	50,50	0,91
chrI	5482796	5482982	readCounts:656	950	-	5482796	5482982	0	2	50,50	0,136
chrI	5482955	5483107	readCounts:505	950	-	5482955	5483107	0	2	50,50	0,102
chrI	5483224	5483405	readCounts:423	950	-	5483224	5483405	0	2	50,50	0,131
chrI	5483461	5483608	readCounts:447	950	-	5483461	5483608	0	2	50,50	0,97
chrI	5483641	5483949	readCounts:245	950	-	5483641	5483949	0	2	50,50	0,258
chrI	5483650	5483949	readCounts:151	950	-	5483650	5483949	0	2	50,50	0,249
chrI	5484060	5484209	readCounts:266	950	-	5484060	5484209	0	2	50,50	0,99
chrI	5484194	5484336	readCounts:371	950	-	5484194	5484336	0	2	50,50	0,92
chrI	5484337	5484483	readCounts:420	950	-	5484337	5484483	0	2	50,50	0,96
chrI	5484463	5484603	readCounts:799	950	-	5484463	5484603	0	2	50,50	0,90
chrI	5484909	5485101	readCounts:2674159	950	-	5484909	5485101	0	2	50,50	0,142
chrI	5484909	5485757	readCounts:9	950	-	5484909	5485757	0	2	50,50	0,798
chrI	5485016	5485227	readCounts:5	950	-	5485016	5485227	0	2	50,50	0,161
chrI	5485139	5485306	readCounts:10	950	-	5485139	5485306	0	2	50,50	0,117
chrI	5485252	5485430	readCounts:1481737	950	-	5485252	5485430	0	2	50,50	0,128
chrI	5485252	5485562	readCounts:43	950	-	5485252	5485562	0	2	50,50	0,260
chrI	5485443	5485757	readCounts:51	950	-	5485443	5485757	0	2	50,50	0,264
chrI	5485525	5485757	readCounts:32	950	-	5485525	5485757	0	2	50,50	0,182
chrI	5485541	5485757	readCounts:1027753	950	-	5485541	5485757	0	2	50,50	0,166
chrI	5485692	5486324	readCounts:47030	950	-	5485692	5486324	0	2	50,50	0,582
chrI	5486784	5486927	readCounts:13	950	-	5486784	5486927	0	2	50,50	0,93
chrI	5487440	5487766	readCounts:3302	950	-	5487440	5487766	0	2	50,50	0,276
chrI	5487732	5487985	readCounts:8110	950	-	5487732	5487985	0	2	50,50	0,203
chrI	5487954	5488100	readCounts:12	950	-	5487954	5488100	0	2	50,50	0,96
chrI	5487954	5488104	readCounts:7651	950	-	5487954	5488104	0	2	50,50	0,100
chrI	5487954	5488178	readCounts:8	950	-	5487954	5488178	0	2	50,50	0,174
chrI	5488031	5488178	readCounts:7661	950	-	5488031	5488178	0	2	50,50	0,97
chrI	8103876	8104019	readCounts:191	950	+	8103876	8104019	0	2	50,50	0,93
chrI	8104900	8105057	readCounts:136	950	+	8104900	8105057	0	2	50,50	0,107
chrI	8105089	8105825	readCounts:116	950	+	8105089	8105825	0	2	50,50	0,686
chrI	8105982	8106184	readCounts:200	950	+	8105982	8106184	0	2	50,50	0,152
chrI	8107451	8107646	readCounts:2496	950	+	8107451	8107646	0	2	50,50	0,145
chrI	8108208	8108776	readCounts:2302	950	+	8108208	8108776	0	2	50,50	0,518
chrI	8108208	8108782	readCounts:7104	950	+	8108208	8108782	0	2	50,50	0,524
chrI	8108752	8108915	readCounts:23	950	+	8108752	8108915	0	2	50,50	0,113
chrI	8110190	8110370	readCounts:15045	950	-	8110190	8110370	0	2	50,50	0,130
chrI	8110358	8110959	readCounts:11433	950	-	8110358	8110959	0	2	50,50	0,551
chrI	8111283	8111748	readCounts:4464	950	-	8111283	8111748	0	2	50,50	0,415
chrI	8111826	8112009	readCounts:2710	950	-	8111826	8112009	0	2	50,50	0,133
chrI	8112055	8112214	readCounts:2626	950	-	8112055	8112214	0	2	50,50	0,109
chrI	8112323	8113768	readCounts:356	950	-	8112323	8113768	0	2	50,50	0,1395
chrI	8112344	8113279	readCounts:38	950	-	8112344	8113279	0	2	50,50	0,885
chrI	8112344	8113768	readCounts:2021	950	-	8112344	8113768	0	2	50,50	0,1374
chrI	8113843	8114413	readCounts:1848	950	-	8113843	8114413	0	2	50,50	0,520
chrI	8114759	8114959	readCounts:785	950	-	8114759	8114959	0	2	50,50	0,150
chrI	8114947	8115130	readCounts:433	950	-	8114947	8115130	0	2	50,50	0,133
chrI	8115258	8115833	readCounts:226	950	-	8115258	8115833	0	2	50,50	0,525
chrI	8115258	8116692	readCounts:31	950	-	8115258	8116692	0	2	50,50	0,1384
chrI	8115817	8116692	readCounts:235	950	-	8115817	8116692	0	2	50,50	0,825
chrI	8116228	8116692	readCounts:14	950	-	8116228	8116692	0	2	50,50	0,414
chrI	8116816	8117379	readCounts:296	950	-	8116816	8117379	0	2	50,50	0,513
chrI	8117331	8117639	readCounts:270	950	-	8117331	8117639	0	2	50,50	0,258
chrI	8117629	8118328	readCounts:220	950	-	8117629	8118328	0	2	50,50	0,649
chrI	8118467	8119212	readCounts:148	950	-	8118467	8119212	0	2	50,50	0,695
chrI	8125975	8126124	readCounts:228	950	+	8125975	8126124	0	2	50,50	0,99
chrI	8126109	8126259	readCounts:277	950	+	8126109	8126259	0	2	50,50	0,100
chrI	8126263	8126500	readCounts:315	950	+	8126263	8126500	0	2	50,50	0,187
chrI	8126762	8127442	readCounts:1170	950	+	8126762	8127442	0	2	50,50	0,630
chrI	8127685	8128028	readCounts:1858	950	+	8127685	8128028	0	2	50,50	0,293
chrI	8127994	8128584	readCounts:2958	950	+	8127994	8128584	0	2	50,50	0,540
chrI	8128167	8128584	readCounts:68	950	+	8128167	8128584	0	2	50,50	0,367
chrI	8128600	8129217	readCounts:3150	950	+	8128600	8129217	0	2	50,50	0,567
chrI	8129373	8129519	readCounts:11	950	+	8129373	8129519	0	2	50,50	0,96
chrI	8129550	8129853	readCounts:15604	950	+	8129550	8129853	0	2	50,50	0,253
chrI	6307321	6307462	readCounts:717	950	+	6307321	6307462	0	2	50,50	0,91
chrI	6307427	6307570	readCounts:914	950	+	6307427	6307570	0	2	50,50	0,93
chrI	6307600	6307940	readCounts:1434	950	+	6307600	6307940	0	2	50,50	0,290
chrI	6307646	6307940	readCounts:108	950	+	6307646	6307940	0	2	50,50	0,244
chrI	6308091	6308238	readCounts:2294	950	+	6308091	6308238	0	2	50,50	0,97
chrI	6308231	6308380	readCounts:2190	950	+	6308231	6308380	0	2	50,50	0,99
chrI	6308231	6308387	readCounts:49	950	+	6308231	6308387	0	2	50,50	0,106
chrI	6308375	6308605	readCounts:975	950	+	6308375	6308605	0	2	50,50	0,180
chrI	6305024	6305307	readCounts:943	950	-	6305024	6305307	0	2	50,50	0,233
chrI	6305295	6305457	readCounts:6	950	-	6305295	6305457	0	2	50,50	0,112
chrI	6305302	6305457	readCounts:1974	950	-	6305302	6305457	0	2	50,50	0,105
chrI	6305447	6305591	readCounts:1636	950	-	6305447	6305591	0	2	50,50	0,94
chrI	6305733	6305980	readCounts:5	950	-	6305733	6305980	0	2	50,50	0,197
chrI	6305733	6306081	readCounts:6	950	-	6305733	6306081	0	2	50,50	0,298
chrI	6305733	6306107	readCounts:924	950	-	6305733	6306107	0	2	50,50	0,324
chrI	6306137	6306280	readCounts:758	950	-	6306137	6306280	0	2	50,50	0,93
chrI	6306245	6306386	readCounts:637	950	-	6306245	6306386	0	2	50,50	0,91
chrI	6303782	6304146	readCounts:14	950	+	6303782	6304146	0	2	50,50	0,314
chrI	6297937	6298410	readCounts:10	950	+	6297937	6298410	0	2	50,50	0,423
chrI	6298963	6299615	readCounts:12	950	+	6298963	6299615	0	2	50,50	0,602
chrI	6295139	6295307	readCounts:3885	950	+	6295139	6295307	0	2	50,50	0,118
chrI	6295266	6295956	readCounts:5764	950	+	6295266	6295956	0	2	50,50	0,640
chrI	6296047	6296196	readCounts:7369	950	+	6296047	6296196	0	2	50,50	0,99
chrI	6296263	6296417	readCounts:10881	950	+	6296263	6296417	0	2	50,50	0,104
chrI	6296523	6296702	readCounts:22728	950	+	6296523	6296702	0	2	50,50	0,129
chrI	6296778	6296923	readCounts:37072	950	+	6296778	6296923	0	2	50,50	0,95
chrI	6297053	6297192	readCounts:109	950	+	6297053	6297192	0	2	50,50	0,89
chrI	6297053	6297202	readCounts:38490	950	+	6297053	6297202	0	2	50,50	0,99
chrI	6297222	6297378	readCounts:40198	950	+	6297222	6297378	0	2	50,50	0,106
chrI	6289429	6290365	readCounts:67	950	+	6289429	6290365	0	2	50,50	0,886
chrI	6290320	6290467	readCounts:112	950	+	6290320	6290467	0	2	50,50	0,97
chrI	6290472	6290619	readCounts:166	950	+	6290472	6290619	0	2	50,50	0,97
chrI	6290626	6290931	readCounts:274	950	+	6290626	6290931	0	2	50,50	0,255
chrI	6290926	6291075	readCounts:311	950	+	6290926	6291075	0	2	50,50	0,99
chrI	6291190	6291896	readCounts:702	950	+	6291190	6291896	0	2	50,50	0,656
chrI	6291891	6292294	readCounts:487	950	+	6291891	6292294	0	2	50,50	0,353
chrI	6291950	6292294	readCounts:960	950	+	6291950	6292294	0	2	50,50	0,294
chrI	6292351	6292620	readCounts:26	950	+	6292351	6292620	0	2	50,50	0,219
chrI	6292351	6293739	readCounts:2000	950	+	6292351	6293739	0	2	50,50	0,1338
chrI	6292580	6293739	readCounts:25	950	+	6292580	6293739	0	2	50,50	0,1109
chrI	6293337	6293739	readCounts:112	950	+	6293337	6293739	0	2	50,50	0,352
chrI	6285323	6286713	readCounts:19240	950	+	6285323	6286713	0	2	50,50	0,1340
chrI	6286513	6286713	readCounts:6	950	+	6286513	6286713	0	2	50,50	0,150
chrI	6286748	6287295	readCounts:269	950	+	6286748	6287295	0	2	50,50	0,497
chrI	6286772	6287085	readCounts:21428	950	+	6286772	6287085	0	2	50,50	0,263
chrI	6287303	6287476	readCounts:51691	950	+	6287303	6287476	0	2	50,50	0,123
chrI	6287563	6288974	readCounts:7	950	+	6287563	6288974	0	2	50,50	0,1361
chrI	6287717	6288974	readCounts:60992	950	+	6287717	6288974	0	2	50,50	0,1207
chrI	6287921	6288974	readCounts:63	950	+	6287921	6288974	0	2	50,50	0,1003
chrI	6288503	6288974	readCounts:19	950	+	6288503	6288974	0	2	50,50	0,421
chrI	6288527	6288974	readCounts:5	950	+	6288527	6288974	0	2	50,50	0,397
chrI	6288559	6288974	readCounts:157	950	+	6288559	6288974	0	2	50,50	0,365
chrI	6271992	6272639	readCounts:6	950	-	6271992	6272639	0	2	50,50	0,597
chrI	6272187	6272328	readCounts:71817	950	-	6272187	6272328	0	2	50,50	0,91
chrI	6272187	6273052	readCounts:49	950	-	6272187	6273052	0	2	50,50	0,815
chrI	6272328	6272473	readCounts:5	950	-	6272328	6272473	0	2	50,50	0,95
chrI	6272393	6272555	readCounts:7	950	-	6272393	6272555	0	2	50,50	0,112
chrI	6273131	6273512	readCounts:9726	950	-	6273131	6273512	0	2	50,50	0,331
chrI	6273356	6273512	readCounts:11	950	-	6273356	6273512	0	2	50,50	0,106
chrI	6273609	6273756	readCounts:2721	950	-	6273609	6273756	0	2	50,50	0,97
chrI	6274918	6275071	readCounts:11983	950	-	6274918	6275071	0	2	50,50	0,103
chrI	4747649	4747792	readCounts:80	950	+	4747649	4747792	0	2	50,50	0,93
chrI	4747763	4753790	readCounts:129	950	+	4747763	4753790	0	2	50,50	0,5977
chrI	4753821	4756069	readCounts:171	950	+	4753821	4756069	0	2	50,50	0,2198
chrI	4755139	4756069	readCounts:5	950	+	4755139	4756069	0	2	50,50	0,880
chrI	4756129	4756273	readCounts:353	950	+	4756129	4756273	0	2	50,50	0,94
chrI	4756318	4756470	readCounts:343	950	+	4756318	4756470	0	2	50,50	0,102
chrI	4757256	4757405	readCounts:1195	950	+	4757256	4757405	0	2	50,50	0,99
chrI	4758160	4759093	readCounts:15	950	+	4758160	4759093	0	2	50,50	0,883
chrI	4758307	4759093	readCounts:7988	950	+	4758307	4759093	0	2	50,50	0,736
chrI	4760441	4760594	readCounts:12	950	-	4760441	4760594	0	2	50,50	0,103
chrI	4760443	4760594	readCounts:4639	950	-	4760443	4760594	0	2	50,50	0,101
chrI	4760683	4760832	readCounts:3720	950	-	4760683	4760832	0	2	50,50	0,99
chrI	4731719	4732501	readCounts:859	950	+	4731719	4732501	0	2	50,50	0,732
chrI	4732482	4732638	readCounts:1102	950	+	4732482	4732638	0	2	50,50	0,106
chrI	4732631	4733200	readCounts:1346	950	+	4732631	4733200	0	2	50,50	0,519
chrI	4733732	4734636	readCounts:2665	950	+	4733732	4734636	0	2	50,50	0,854
chrI	4727427	4728168	readCounts:736	950	+	4727427	4728168	0	2	50,50	0,691
chrI	4728254	4728785	readCounts:952	950	+	4728254	4728785	0	2	50,50	0,481
chrI	4728997	4729142	readCounts:1254	950	+	4728997	4729142	0	2	50,50	0,95
chrI	4729362	4729649	readCounts:2081	950	+	4729362	4729649	0	2	50,50	0,237
chrI	4730005	4730154	readCounts:3169	950	+	4730005	4730154	0	2	50,50	0,99
chrI	4724164	4724314	readCounts:9	950	+	4724164	4724314	0	2	50,50	0,100
chrI	4724295	4724445	readCounts:6	950	+	4724295	4724445	0	2	50,50	0,100
chrI	4724438	4725105	readCounts:9	950	+	4724438	4725105	0	2	50,50	0,617
chrI	4725317	4725513	readCounts:16	950	+	4725317	4725513	0	2	50,50	0,146
chrI	4726189	4726644	readCounts:89	950	+	4726189	4726644	0	2	50,50	0,405
chrI	4721314	4721460	readCounts:2154	950	+	4721314	4721460	0	2	50,50	0,96
chrI	4721534	4721870	readCounts:2171	950	+	4721534	4721870	0	2	50,50	0,286
chrI	4722014	4722162	readCounts:5219	950	+	4722014	4722162	0	2	50,50	0,98
chrI	4722130	4722355	readCounts:4838	950	+	4722130	4722355	0	2	50,50	0,175
chrI	4722575	4723094	readCounts:6702	950	+	4722575	4723094	0	2	50,50	0,469
chrI	4723230	4723375	readCounts:97	950	+	4723230	4723375	0	2	50,50	0,95
chrI	4723450	4723597	readCounts:24183	950	+	4723450	4723597	0	2	50,50	0,97
chrI	4719977	4720309	readCounts:9564	950	+	4719977	4720309	0	2	50,50	0,282
chrI	4720266	4720413	readCounts:9688	950	+	4720266	4720413	0	2	50,50	0,97
chrI	4735841	4736041	readCounts:9615	950	-	4735841	4736041	0	2	50,50	0,150
chrI	4736561	4737390	readCounts:2928	950	-	4736561	4737390	0	2	50,50	0,779
chrI	4737394	4737585	readCounts:25	950	-	4737394	4737585	0	2	50,50	0,141
chrI	4737434	4737585	readCounts:2692	950	-	4737434	4737585	0	2	50,50	0,101
chrI	4737635	4738104	readCounts:2287	950	-	4737635	4738104	0	2	50,50	0,419
chrI	4738969	4739121	readCounts:28	950	-	4738969	4739121	0	2	50,50	0,102
chrI	4738975	4739121	readCounts:11	950	-	4738975	4739121	0	2	50,50	0,96
chrI	4739086	4739564	readCounts:10982	950	-	4739086	4739564	0	2	50,50	0,428
chrI	4739723	4739875	readCounts:5669	950	-	4739723	4739875	0	2	50,50	0,102
chrI	4739946	4740550	readCounts:3612	950	-	4739946	4740550	0	2	50,50	0,554
chrI	4740687	4740835	readCounts:2963	950	-	4740687	4740835	0	2	50,50	0,98
chrI	4740804	4740957	readCounts:2793	950	-	4740804	4740957	0	2	50,50	0,103
chrI	4742028	4742176	readCounts:409	950	-	4742028	4742176	0	2	50,50	0,98
chrI	4742482	4742630	readCounts:480	950	-	4742482	4742630	0	2	50,50	0,98
chrI	4743245	4743761	readCounts:209	950	-	4743245	4743761	0	2	50,50	0,466
chrI	4743245	4744110	readCounts:8	950	-	4743245	4744110	0	2	50,50	0,815
chrI	4743822	4744110	readCounts:109	950	-	4743822	4744110	0	2	50,50	0,238
chrI	4744092	4744242	readCounts:196	950	-	4744092	4744242	0	2	50,50	0,100
chrI	4409726	4411805	readCounts:73	950	+	4409726	4411805	0	2	50,50	0,2029
chrI	4411819	4414345	readCounts:64	950	+	4411819	4414345	0	2	50,50	0,2476
chrI	4414318	4415270	readCounts:114	950	+	4414318	4415270	0	2	50,50	0,902
chrI	4415264	4416220	readCounts:116	950	+	4415264	4416220	0	2	50,50	0,906
chrI	4416230	4417122	readCounts:217	950	+	4416230	4417122	0	2	50,50	0,842
chrI	4417142	4417288	readCounts:158	950	+	4417142	4417288	0	2	50,50	0,96
chrI	4417251	4417480	readCounts:10	950	+	4417251	4417480	0	2	50,50	0,179
chrI	4417251	4418296	readCounts:214	950	+	4417251	4418296	0	2	50,50	0,995
chrI	4418541	4422081	readCounts:355	950	+	4418541	4422081	0	2	50,50	0,3490
chrI	4422085	4422735	readCounts:477	950	+	4422085	4422735	0	2	50,50	0,600
chrI	4422837	4423005	readCounts:708	950	+	4422837	4423005	0	2	50,50	0,118
chrI	4423115	4423879	readCounts:884	950	+	4423115	4423879	0	2	50,50	0,714
chrI	4423947	4424093	readCounts:1630	950	+	4423947	4424093	0	2	50,50	0,96
chrI	4424110	4424257	readCounts:2020	950	+	4424110	4424257	0	2	50,50	0,97
chrI	4424307	4424867	readCounts:2496	950	+	4424307	4424867	0	2	50,50	0,510
chrI	4425169	4425550	readCounts:3805	950	+	4425169	4425550	0	2	50,50	0,331
chrI	4425588	4425742	readCounts:4135	950	+	4425588	4425742	0	2	50,50	0,104
chrI	4425763	4425920	readCounts:4693	950	+	4425763	4425920	0	2	50,50	0,107
chrI	9321219	9321380	readCounts:498	950	-	9321219	9321380	0	2	50,50	0,111
chrI	9322279	9322456	readCounts:58	950	-	9322279	9322456	0	2	50,50	0,127
chrI	9327922	9328067	readCounts:1446	950	+	9327922	9328067	0	2	50,50	0,95
chrI	9328024	9328824	readCounts:2445	950	+	9328024	9328824	0	2	50,50	0,750
chrI	9328024	9329429	readCounts:646	950	+	9328024	9329429	0	2	50,50	0,1355
chrI	9329259	9329429	readCounts:5837	950	+	9329259	9329429	0	2	50,50	0,120
chrI	9329415	9329892	readCounts:7261	950	+	9329415	9329892	0	2	50,50	0,427
chrI	9329904	9330053	readCounts:8719	950	+	9329904	9330053	0	2	50,50	0,99
chrI	9330193	9330346	readCounts:7	950	+	9330193	9330346	0	2	50,50	0,103
chrI	9330199	9330346	readCounts:12756	950	+	9330199	9330346	0	2	50,50	0,97
chrI	9330386	9330710	readCounts:15221	950	+	9330386	9330710	0	2	50,50	0,274
chrI	9336076	9336222	readCounts:871	950	-	9336076	9336222	0	2	50,50	0,96
chrI	9336393	9336540	readCounts:733	950	-	9336393	9336540	0	2	50,50	0,97
chrI	9337118	9337263	readCounts:195	950	-	9337118	9337263	0	2	50,50	0,95
chrI	9337376	9337836	readCounts:191	950	-	9337376	9337836	0	2	50,50	0,410
chrI	9338108	9338257	readCounts:214	950	-	9338108	9338257	0	2	50,50	0,99
chrI	9338237	9338552	readCounts:173	950	-	9338237	9338552	0	2	50,50	0,265
chrI	9338754	9338905	readCounts:47	950	-	9338754	9338905	0	2	50,50	0,101
chrI	9338766	9338905	readCounts:31	950	-	9338766	9338905	0	2	50,50	0,89
chrI	9338902	9340069	readCounts:81	950	-	9338902	9340069	0	2	50,50	0,1117
chrI	9340093	9340247	readCounts:109	950	-	9340093	9340247	0	2	50,50	0,104
chrI	9340419	9340906	readCounts:79	950	-	9340419	9340906	0	2	50,50	0,437
chrI	9341078	9341225	readCounts:103	950	-	9341078	9341225	0	2	50,50	0,97
chrI	9341266	9341409	readCounts:65	950	-	9341266	9341409	0	2	50,50	0,93
chrI	9341359	9341502	readCounts:128	950	-	9341359	9341502	0	2	50,50	0,93
chrI	9341664	9341811	readCounts:69	950	-	9341664	9341811	0	2	50,50	0,97
chrI	9341863	9342367	readCounts:22	950	-	9341863	9342367	0	2	50,50	0,454
chrI	7386380	7386549	readCounts:11	950	-	7386380	7386549	0	2	50,50	0,119
chrI	7384467	7388130	readCounts:14	950	+	7384467	7388130	0	2	50,50	0,3613
chrI	7384528	7388130	readCounts:66	950	+	7384528	7388130	0	2	50,50	0,3552
chrI	7386899	7388130	readCounts:18	950	+	7386899	7388130	0	2	50,50	0,1181
chrI	7387363	7387794	readCounts:25	950	+	7387363	7387794	0	2	50,50	0,381
chrI	7387363	7388130	readCounts:3692	950	+	7387363	7388130	0	2	50,50	0,717
chrI	7387980	7388130	readCounts:15	950	+	7387980	7388130	0	2	50,50	0,100
chrI	7387984	7388130	readCounts:153	950	+	7387984	7388130	0	2	50,50	0,96
chrI	7388479	7388664	readCounts:9739	950	+	7388479	7388664	0	2	50,50	0,135
chrI	7388517	7388664	readCounts:78	950	+	7388517	7388664	0	2	50,50	0,97
chrI	7389371	7389685	readCounts:4116	950	-	7389371	7389685	0	2	50,50	0,264
chrI	7389371	7390207	readCounts:16	950	-	7389371	7390207	0	2	50,50	0,786
chrI	7389754	7389900	readCounts:4336	950	-	7389754	7389900	0	2	50,50	0,96
chrI	7389754	7390207	readCounts:18	950	-	7389754	7390207	0	2	50,50	0,403
chrI	7389906	7390207	readCounts:106	950	-	7389906	7390207	0	2	50,50	0,251
chrI	7389915	7390207	readCounts:3231	950	-	7389915	7390207	0	2	50,50	0,242
chrI	7390246	7390503	readCounts:2524	950	-	7390246	7390503	0	2	50,50	0,207
chrI	7390608	7391127	readCounts:8	950	-	7390608	7391127	0	2	50,50	0,469
chrI	7390608	7391909	readCounts:556	950	-	7390608	7391909	0	2	50,50	0,1251
chrI	7390608	7392255	readCounts:992	950	-	7390608	7392255	0	2	50,50	0,1597
chrI	7390608	7394372	readCounts:82	950	-	7390608	7394372	0	2	50,50	0,3714
chrI	7390623	7391909	readCounts:83	950	-	7390623	7391909	0	2	50,50	0,1236
chrI	7390623	7392255	readCounts:5	950	-	7390623	7392255	0	2	50,50	0,1582
chrI	7392213	7394372	readCounts:831	950	-	7392213	7394372	0	2	50,50	0,2109
chrI	7394458	7395042	readCounts:789	950	-	7394458	7395042	0	2	50,50	0,534
chrI	7395029	7395182	readCounts:717	950	-	7395029	7395182	0	2	50,50	0,103
chrI	7395227	7395405	readCounts:647	950	-	7395227	7395405	0	2	50,50	0,128
chrI	7395425	7395607	readCounts:499	950	-	7395425	7395607	0	2	50,50	0,132
chrI	7395572	7395753	readCounts:448	950	-	7395572	7395753	0	2	50,50	0,131
chrI	7398979	7399128	readCounts:3112	950	-	7398979	7399128	0	2	50,50	0,99
chrI	7399160	7399321	readCounts:2642	950	-	7399160	7399321	0	2	50,50	0,111
chrI	7399329	7399542	readCounts:2913	950	-	7399329	7399542	0	2	50,50	0,163
chrI	7399329	7399668	readCounts:89	950	-	7399329	7399668	0	2	50,50	0,289
chrI	7399731	7399906	readCounts:1445	950	-	7399731	7399906	0	2	50,50	0,125
chrI	7399919	7400300	readCounts:1131	950	-	7399919	7400300	0	2	50,50	0,331
chrI	7400408	7400578	readCounts:652	950	-	7400408	7400578	0	2	50,50	0,120
chrI	7400606	7400750	readCounts:657	950	-	7400606	7400750	0	2	50,50	0,94
chrI	7400748	7400902	readCounts:401	950	-	7400748	7400902	0	2	50,50	0,104
chrI	7401787	7401948	readCounts:32019	950	+	7401787	7401948	0	2	50,50	0,111
chrI	7401787	7401987	readCounts:8	950	+	7401787	7401987	0	2	50,50	0,150
chrI	7401978	7402498	readCounts:29	950	+	7401978	7402498	0	2	50,50	0,470
chrI	7402068	7402570	readCounts:33	950	+	7402068	7402570	0	2	50,50	0,452
chrI	7402113	7402266	readCounts:27	950	+	7402113	7402266	0	2	50,50	0,103
chrI	7402113	7402444	readCounts:99	950	+	7402113	7402444	0	2	50,50	0,281
chrI	7402200	7402336	readCounts:14	950	+	7402200	7402336	0	2	50,50	0,86
chrI	7402335	7402462	readCounts:115	950	+	7402335	7402462	0	2	50,50	0,77
chrI	7402335	7402498	readCounts:11	950	+	7402335	7402498	0	2	50,50	0,113
chrI	7402371	7402522	readCounts:129	950	+	7402371	7402522	0	2	50,50	0,101
chrI	7402371	7402525	readCounts:315	950	+	7402371	7402525	0	2	50,50	0,104
chrI	7402371	7402570	readCounts:44	950	+	7402371	7402570	0	2	50,50	0,149
chrI	7403469	7403677	readCounts:1533	950	-	7403469	7403677	0	2	50,50	0,158
chrI	7403478	7403677	readCounts:1126	950	-	7403478	7403677	0	2	50,50	0,149
chrI	7403505	7403677	readCounts:185	950	-	7403505	7403677	0	2	50,50	0,122
chrI	7403523	7403677	readCounts:28	950	-	7403523	7403677	0	2	50,50	0,104
chrI	7403550	7404070	readCounts:12	950	-	7403550	7404070	0	2	50,50	0,470
chrI	7403577	7403731	readCounts:17	950	-	7403577	7403731	0	2	50,50	0,104
chrI	7403595	7403731	readCounts:26	950	-	7403595	7403731	0	2	50,50	0,86
chrI	7403595	7403935	readCounts:7	950	-	7403595	7403935	0	2	50,50	0,290
chrI	7403622	7403848	readCounts:7	950	-	7403622	7403848	0	2	50,50	0,176
chrI	7403691	7403935	readCounts:16	950	-	7403691	7403935	0	2	50,50	0,194
chrI	7403718	7403842	readCounts:17	950	-	7403718	7403842	0	2	50,50	0,74
chrI	7403854	7404261	readCounts:10	950	-	7403854	7404261	0	2	50,50	0,357
chrI	7404100	7404261	readCounts:44135	950	-	7404100	7404261	0	2	50,50	0,111
chrI	7405056	7405203	readCounts:2199	950	+	7405056	7405203	0	2	50,50	0,97
chrI	7405231	7405394	readCounts:2874	950	+	7405231	7405394	0	2	50,50	0,113
chrI	7405502	7405881	readCounts:4730	950	+	7405502	7405881	0	2	50,50	0,329
chrI	7405871	7406037	readCounts:1318	950	+	7405871	7406037	0	2	50,50	0,116
chrI	7405894	7406037	readCounts:4354	950	+	7405894	7406037	0	2	50,50	0,93
chrI	7406226	7406374	readCounts:10334	950	+	7406226	7406374	0	2	50,50	0,98
chrI	7406382	7407850	readCounts:10112	950	+	7406382	7407850	0	2	50,50	0,1418
chrI	7407877	7408031	readCounts:11	950	+	7407877	7408031	0	2	50,50	0,104
chrI	7407882	7408031	readCounts:13080	950	+	7407882	7408031	0	2	50,50	0,99
chrI	7407882	7408067	readCounts:25	950	+	7407882	7408067	0	2	50,50	0,135
chrI	12202284	12202631	readCounts:19461	950	+	12202284	12202631	0	2	50,50	0,297
chrI	12202714	12203129	readCounts:20274	950	+	12202714	12203129	0	2	50,50	0,365
chrI	12202714	12203276	readCounts:7	950	+	12202714	12203276	0	2	50,50	0,512
chrI	12203124	12203276	readCounts:7	950	+	12203124	12203276	0	2	50,50	0,102
chrI	12203132	12203276	readCounts:20532	950	+	12203132	12203276	0	2	50,50	0,94
chrI	12203292	12203438	readCounts:22927	950	+	12203292	12203438	0	2	50,50	0,96
chrI	12203916	12204579	readCounts:34745	950	+	12203916	12204579	0	2	50,50	0,613
chrI	12204671	12204889	readCounts:10	950	+	12204671	12204889	0	2	50,50	0,168
chrI	12204737	12204889	readCounts:52547	950	+	12204737	12204889	0	2	50,50	0,102
chrI	12205041	12205558	readCounts:25	950	+	12205041	12205558	0	2	50,50	0,467
chrI	12205041	12205604	readCounts:56	950	+	12205041	12205604	0	2	50,50	0,513
chrI	12205067	12205558	readCounts:85071	950	+	12205067	12205558	0	2	50,50	0,441
chrI	12205087	12205558	readCounts:206	950	+	12205087	12205558	0	2	50,50	0,421
chrI	12207091	12207309	readCounts:753	950	+	12207091	12207309	0	2	50,50	0,168
chrI	12207091	12207318	readCounts:9	950	+	12207091	12207318	0	2	50,50	0,177
chrI	12207479	12207641	readCounts:1183	950	+	12207479	12207641	0	2	50,50	0,112
chrI	12207585	12208491	readCounts:190	950	+	12207585	12208491	0	2	50,50	0,856
chrI	12207606	12208491	readCounts:884	950	+	12207606	12208491	0	2	50,50	0,835
chrI	12207606	12210279	readCounts:6	950	+	12207606	12210279	0	2	50,50	0,2623
chrI	12208530	12209044	readCounts:980	950	+	12208530	12209044	0	2	50,50	0,464
chrI	12209043	12209251	readCounts:1055	950	+	12209043	12209251	0	2	50,50	0,158
chrI	12209494	12210279	readCounts:1674	950	+	12209494	12210279	0	2	50,50	0,735
chrI	12210871	12211849	readCounts:6620	950	+	12210871	12211849	0	2	50,50	0,928
chrI	12213134	12213989	readCounts:5443	950	+	12213134	12213989	0	2	50,50	0,805
chrI	12213134	12213992	readCounts:27	950	+	12213134	12213992	0	2	50,50	0,808
chrI	12213134	12214626	readCounts:10	950	+	12213134	12214626	0	2	50,50	0,1442
chrI	12214016	12214167	readCounts:5796	950	+	12214016	12214167	0	2	50,50	0,101
chrI	12214224	12214626	readCounts:6997	950	+	12214224	12214626	0	2	50,50	0,352
chrI	12214602	12214967	readCounts:8163	950	+	12214602	12214967	0	2	50,50	0,315
chrI	9727310	9727632	readCounts:270	950	+	9727310	9727632	0	2	50,50	0,272
chrI	9727675	9727819	readCounts:341	950	+	9727675	9727819	0	2	50,50	0,94
chrI	9722774	9722924	readCounts:384	950	+	9722774	9722924	0	2	50,50	0,100
chrI	9722944	9723154	readCounts:645	950	+	9722944	9723154	0	2	50,50	0,160
chrI	9723138	9723302	readCounts:758	950	+	9723138	9723302	0	2	50,50	0,114
chrI	9723296	9723440	readCounts:996	950	+	9723296	9723440	0	2	50,50	0,94
chrI	9723419	9723896	readCounts:1124	950	+	9723419	9723896	0	2	50,50	0,427
chrI	9724093	9724330	readCounts:2159	950	+	9724093	9724330	0	2	50,50	0,187
chrI	9724344	9724491	readCounts:2516	950	+	9724344	9724491	0	2	50,50	0,97
chrI	9724864	9725016	readCounts:322	950	+	9724864	9725016	0	2	50,50	0,102
chrI	9724902	9725048	readCounts:5327	950	+	9724902	9725048	0	2	50,50	0,96
chrI	9725034	9725451	readCounts:5820	950	+	9725034	9725451	0	2	50,50	0,367
chrI	9725406	9725791	readCounts:128	950	+	9725406	9725791	0	2	50,50	0,335
chrI	9725406	9725801	readCounts:7	950	+	9725406	9725801	0	2	50,50	0,345
chrI	9725410	9725791	readCounts:5	950	+	9725410	9725791	0	2	50,50	0,331
chrI	9715707	9715850	readCounts:15741	950	-	9715707	9715850	0	2	50,50	0,93
chrI	9715857	9716006	readCounts:11153	950	-	9715857	9716006	0	2	50,50	0,99
chrI	9716042	9716484	readCounts:8459	950	-	9716042	9716484	0	2	50,50	0,392
chrI	9716042	9717376	readCounts:10	950	-	9716042	9717376	0	2	50,50	0,1284
chrI	9716784	9717376	readCounts:4795	950	-	9716784	9717376	0	2	50,50	0,542
chrI	9717321	9717649	readCounts:3366	950	-	9717321	9717649	0	2	50,50	0,278
chrI	9717618	9717765	readCounts:18	950	-	9717618	9717765	0	2	50,50	0,97
chrI	9717618	9718246	readCounts:2921	950	-	9717618	9718246	0	2	50,50	0,578
chrI	9718405	9718867	readCounts:1488	950	-	9718405	9718867	0	2	50,50	0,412
chrI	9718417	9718867	readCounts:5	950	-	9718417	9718867	0	2	50,50	0,400
chrI	9719129	9719545	readCounts:880	950	-	9719129	9719545	0	2	50,50	0,366
chrI	9719739	9720377	readCounts:772	950	-	9719739	9720377	0	2	50,50	0,588
chrI	9720395	9720621	readCounts:400	950	-	9720395	9720621	0	2	50,50	0,176
chrI	9720650	9720800	readCounts:318	950	-	9720650	9720800	0	2	50,50	0,100
chrI	9720856	9727983	readCounts:365	950	-	9720856	9727983	0	2	50,50	0,7077
chrI	9724334	9727983	readCounts:8	950	-	9724334	9727983	0	2	50,50	0,3599
chrI	9713056	9713338	readCounts:25	950	-	9713056	9713338	0	2	50,50	0,232
chrI	9713056	9713631	readCounts:32141	950	-	9713056	9713631	0	2	50,50	0,525
chrI	9713056	9713635	readCounts:26	950	-	9713056	9713635	0	2	50,50	0,529
chrI	9713857	9714283	readCounts:14957	950	-	9713857	9714283	0	2	50,50	0,376
chrI	9714464	9714615	readCounts:8143	950	-	9714464	9714615	0	2	50,50	0,101
chrI	9714476	9714615	readCounts:722	950	-	9714476	9714615	0	2	50,50	0,89
chrI	9714761	9715175	readCounts:4961	950	-	9714761	9715175	0	2	50,50	0,364
chrI	11611727	11612052	readCounts:17	950	+	11611727	11612052	0	2	50,50	0,275
chrI	11611768	11612052	readCounts:3014	950	+	11611768	11612052	0	2	50,50	0,234
chrI	11612066	11613042	readCounts:5886	950	+	11612066	11613042	0	2	50,50	0,926
chrI	11612066	11613609	readCounts:16	950	+	11612066	11613609	0	2	50,50	0,1493
chrI	11613142	11613609	readCounts:4984	950	+	11613142	11613609	0	2	50,50	0,417
chrI	11613142	11614367	readCounts:30	950	+	11613142	11614367	0	2	50,50	0,1175
chrI	11613603	11614367	readCounts:7443	950	+	11613603	11614367	0	2	50,50	0,714
chrI	11613603	11615101	readCounts:60	950	+	11613603	11615101	0	2	50,50	0,1448
chrI	11614357	11614520	readCounts:8861	950	+	11614357	11614520	0	2	50,50	0,113
chrI	11614493	11615101	readCounts:10443	950	+	11614493	11615101	0	2	50,50	0,558
chrI	11615128	11616091	readCounts:9176	950	+	11615128	11616091	0	2	50,50	0,913
chrI	11592356	11593976	readCounts:83	950	+	11592356	11593976	0	2	50,50	0,1570
chrI	11593970	11594259	readCounts:85	950	+	11593970	11594259	0	2	50,50	0,239
chrI	11594254	11596996	readCounts:112	950	+	11594254	11596996	0	2	50,50	0,2692
chrI	11595430	11596996	readCounts:5	950	+	11595430	11596996	0	2	50,50	0,1516
chrI	11597058	11597336	readCounts:177	950	+	11597058	11597336	0	2	50,50	0,228
chrI	11597584	11598177	readCounts:204	950	+	11597584	11598177	0	2	50,50	0,543
chrI	11598462	11598923	readCounts:361	950	+	11598462	11598923	0	2	50,50	0,411
chrI	11598901	11600304	readCounts:164	950	+	11598901	11600304	0	2	50,50	0,1353
chrI	11598901	11601245	readCounts:181	950	+	11598901	11601245	0	2	50,50	0,2294
chrI	11598901	11601894	readCounts:101	950	+	11598901	11601894	0	2	50,50	0,2943
chrI	11600354	11601245	readCounts:225	950	+	11600354	11601245	0	2	50,50	0,841
chrI	11600354	11601894	readCounts:9	950	+	11600354	11601894	0	2	50,50	0,1490
chrI	11617726	11617880	readCounts:5	950	-	11617726	11617880	0	2	50,50	0,104
chrI	11586239	11586688	readCounts:2787	950	+	11586239	11586688	0	2	50,50	0,399
chrI	11586624	11586827	readCounts:123	950	+	11586624	11586827	0	2	50,50	0,153
chrI	11586678	11586827	readCounts:3924	950	+	11586678	11586827	0	2	50,50	0,99
chrI	11586881	11587207	readCounts:3745	950	+	11586881	11587207	0	2	50,50	0,276
chrI	11582852	11582999	readCounts:2363	950	-	11582852	11582999	0	2	50,50	0,97
chrI	11583042	11583192	readCounts:2860	950	-	11583042	11583192	0	2	50,50	0,100
chrI	11583160	11583308	readCounts:2666	950	-	11583160	11583308	0	2	50,50	0,98
chrI	11583385	11583539	readCounts:3271	950	-	11583385	11583539	0	2	50,50	0,104
chrI	11583600	11583743	readCounts:2052	950	-	11583600	11583743	0	2	50,50	0,93
chrI	11583600	11583751	readCounts:19	950	-	11583600	11583751	0	2	50,50	0,101
chrI	11583728	11583876	readCounts:1237	950	-	11583728	11583876	0	2	50,50	0,98
chrI	11583728	11583880	readCounts:9	950	-	11583728	11583880	0	2	50,50	0,102
chrI	11583975	11584288	readCounts:72	950	-	11583975	11584288	0	2	50,50	0,263
chrI	11583975	11584319	readCounts:1152	950	-	11583975	11584319	0	2	50,50	0,294
chrI	11583975	11584961	readCounts:21	950	-	11583975	11584961	0	2	50,50	0,936
chrI	11584359	11584502	readCounts:692	950	-	11584359	11584502	0	2	50,50	0,93
chrI	11584508	11584665	readCounts:354	950	-	11584508	11584665	0	2	50,50	0,107
chrI	11584519	11584665	readCounts:154	950	-	11584519	11584665	0	2	50,50	0,96
chrI	11584632	11584961	readCounts:543	950	-	11584632	11584961	0	2	50,50	0,279
chrI	11584936	11585086	readCounts:568	950	-	11584936	11585086	0	2	50,50	0,100
chrI	11585275	11585595	readCounts:166	950	-	11585275	11585595	0	2	50,50	0,270
chrI	11585603	11585750	readCounts:187	950	-	11585603	11585750	0	2	50,50	0,97
chrI	11585727	11585889	readCounts:233	950	-	11585727	11585889	0	2	50,50	0,112
chrI	11585890	11586051	readCounts:101	950	-	11585890	11586051	0	2	50,50	0,111
chrI	11604312	11605895	readCounts:5	950	-	11604312	11605895	0	2	50,50	0,1533
chrI	11605221	11606487	readCounts:1243	950	-	11605221	11606487	0	2	50,50	0,1216
chrI	11606586	11606956	readCounts:1261	950	-	11606586	11606956	0	2	50,50	0,320
chrI	11606961	11607699	readCounts:925	950	-	11606961	11607699	0	2	50,50	0,688
chrI	11607800	11610127	readCounts:609	950	-	11607800	11610127	0	2	50,50	0,2277
chrI	11610167	11610561	readCounts:491	950	-	11610167	11610561	0	2	50,50	0,344
chrI	11610601	11610802	readCounts:169	950	-	11610601	11610802	0	2	50,50	0,151
chrI	11610792	11610942	readCounts:159	950	-	11610792	11610942	0	2	50,50	0,100
chrI	11611106	11611258	readCounts:234	950	-	11611106	11611258	0	2	50,50	0,102
chrI	9408383	9408536	readCounts:2395	950	-	9408383	9408536	0	2	50,50	0,103
chrI	9408543	9408969	readCounts:33	950	-	9408543	9408969	0	2	50,50	0,376
chrI	9408564	9408969	readCounts:143	950	-	9408564	9408969	0	2	50,50	0,355
chrI	9408793	9408969	readCounts:1577	950	-	9408793	9408969	0	2	50,50	0,126
chrI	9409102	9409251	readCounts:14	950	-	9409102	9409251	0	2	50,50	0,99
chrI	9409109	9409251	readCounts:831	950	-	9409109	9409251	0	2	50,50	0,92
chrI	9409385	9409636	readCounts:1039	950	-	9409385	9409636	0	2	50,50	0,201
chrI	9409654	9409801	readCounts:17	950	-	9409654	9409801	0	2	50,50	0,97
chrI	9409654	9409849	readCounts:25	950	-	9409654	9409849	0	2	50,50	0,145
chrI	9409654	9409890	readCounts:546	950	-	9409654	9409890	0	2	50,50	0,186
chrI	9409851	9409995	readCounts:405	950	-	9409851	9409995	0	2	50,50	0,94
chrI	9435522	9436297	readCounts:2123	950	+	9435522	9436297	0	2	50,50	0,725
chrI	9436382	9436529	readCounts:3821	950	+	9436382	9436529	0	2	50,50	0,97
chrI	9436928	9438551	readCounts:6596	950	+	9436928	9438551	0	2	50,50	0,1573
chrI	9436928	9438561	readCounts:11	950	+	9436928	9438561	0	2	50,50	0,1583
chrI	9437992	9438551	readCounts:5	950	+	9437992	9438551	0	2	50,50	0,509
chrI	9438126	9438551	readCounts:193	950	+	9438126	9438551	0	2	50,50	0,375
chrI	9438285	9438551	readCounts:36	950	+	9438285	9438551	0	2	50,50	0,216
chrI	9438585	9438734	readCounts:7040	950	+	9438585	9438734	0	2	50,50	0,99
chrI	9438585	9438754	readCounts:5	950	+	9438585	9438754	0	2	50,50	0,119
chrI	9438806	9440668	readCounts:10287	950	+	9438806	9440668	0	2	50,50	0,1812
chrI	9438843	9440668	readCounts:5	950	+	9438843	9440668	0	2	50,50	0,1775
chrI	9420439	9420586	readCounts:4895	950	-	9420439	9420586	0	2	50,50	0,97
chrI	9420577	9420721	readCounts:4210	950	-	9420577	9420721	0	2	50,50	0,94
chrI	9411016	9411301	readCounts:27	950	+	9411016	9411301	0	2	50,50	0,235
chrI	9412848	9412995	readCounts:56	950	+	9412848	9412995	0	2	50,50	0,97
chrI	9414721	9415329	readCounts:612	950	+	9414721	9415329	0	2	50,50	0,558
chrI	9416063	9416216	readCounts:1087	950	+	9416063	9416216	0	2	50,50	0,103
chrI	9416212	9416360	readCounts:5	950	+	9416212	9416360	0	2	50,50	0,98
chrI	9417097	9417266	readCounts:8	950	-	9417097	9417266	0	2	50,50	0,119
chrI	9417097	9417394	readCounts:9	950	-	9417097	9417394	0	2	50,50	0,247
chrI	9417097	9417625	readCounts:8	950	-	9417097	9417625	0	2	50,50	0,478
chrI	9417097	9417694	readCounts:6680	950	-	9417097	9417694	0	2	50,50	0,547
chrI	9417509	9417694	readCounts:5	950	-	9417509	9417694	0	2	50,50	0,135
chrI	9417760	9417903	readCounts:3989	950	-	9417760	9417903	0	2	50,50	0,93
chrI	9417944	9418091	readCounts:4395	950	-	9417944	9418091	0	2	50,50	0,97
chrI	9418272	9418417	readCounts:3077	950	-	9418272	9418417	0	2	50,50	0,95
chrI	9418553	9418699	readCounts:1186	950	-	9418553	9418699	0	2	50,50	0,96
chrI	9419524	9419675	readCounts:11719	950	+	9419524	9419675	0	2	50,50	0,101
chrI	9419637	9419778	readCounts:10016	950	+	9419637	9419778	0	2	50,50	0,91
chrI	9419637	9419787	readCounts:29	950	+	9419637	9419787	0	2	50,50	0,100
chrI	9421454	9421604	readCounts:73690	950	-	9421454	9421604	0	2	50,50	0,100
chrI	9421454	9421724	readCounts:29	950	-	9421454	9421724	0	2	50,50	0,220
chrI	9421797	9421949	readCounts:41643	950	-	9421797	9421949	0	2	50,50	0,102
chrI	9422616	9422765	readCounts:1902	950	+	9422616	9422765	0	2	50,50	0,99
chrI	9422825	9422969	readCounts:2371	950	+	9422825	9422969	0	2	50,50	0,94
chrI	9422992	9423139	readCounts:4446	950	+	9422992	9423139	0	2	50,50	0,97
chrI	9423362	9423602	readCounts:5005	950	+	9423362	9423602	0	2	50,50	0,190
chrI	9423632	9429842	readCounts:5288	950	+	9423632	9429842	0	2	50,50	0,6160
chrI	9427224	9429842	readCounts:10	950	+	9427224	9429842	0	2	50,50	0,2568
chrI	9429910	9430465	readCounts:10842	950	+	9429910	9430465	0	2	50,50	0,505
chrI	9431254	9431402	readCounts:2490	950	+	9431254	9431402	0	2	50,50	0,98
chrI	9431457	9431625	readCounts:3567	950	+	9431457	9431625	0	2	50,50	0,118
chrI	9431852	9432020	readCounts:9010	950	+	9431852	9432020	0	2	50,50	0,118
chrI	9432223	9432618	readCounts:26682	950	+	9432223	9432618	0	2	50,50	0,345
chrI	9432575	9433165	readCounts:17	950	+	9432575	9433165	0	2	50,50	0,540
chrI	9432855	9433198	readCounts:37	950	+	9432855	9433198	0	2	50,50	0,293
chrI	6669274	6669428	readCounts:93476	950	+	6669274	6669428	0	2	50,50	0,104
chrI	6682438	6682781	readCounts:3728	950	+	6682438	6682781	0	2	50,50	0,293
chrI	6683067	6683537	readCounts:31	950	+	6683067	6683537	0	2	50,50	0,420
chrI	6683220	6683474	readCounts:2064	950	+	6683220	6683474	0	2	50,50	0,204
chrI	13117980	13119213	readCounts:45	950	-	13117980	13119213	0	2	50,50	0,1183
chrI	13119494	13119698	readCounts:21	950	-	13119494	13119698	0	2	50,50	0,154
chrI	13119853	13120041	readCounts:24	950	-	13119853	13120041	0	2	50,50	0,138
chrI	13120181	13120326	readCounts:13	950	-	13120181	13120326	0	2	50,50	0,95
chrI	13133768	13134175	readCounts:97	950	+	13133768	13134175	0	2	50,50	0,357
chrI	13134329	13134742	readCounts:141	950	+	13134329	13134742	0	2	50,50	0,363
chrI	13134814	13135128	readCounts:91	950	+	13134814	13135128	0	2	50,50	0,264
chrI	13135199	13135822	readCounts:197	950	+	13135199	13135822	0	2	50,50	0,573
chrI	13107199	13107340	readCounts:75	950	+	13107199	13107340	0	2	50,50	0,91
chrI	13124500	13124642	readCounts:166	950	-	13124500	13124642	0	2	50,50	0,92
chrI	13124905	13125590	readCounts:104	950	-	13124905	13125590	0	2	50,50	0,635
chrI	13125661	13126634	readCounts:6	950	-	13125661	13126634	0	2	50,50	0,923
chrI	13125667	13126634	readCounts:62	950	-	13125667	13126634	0	2	50,50	0,917
chrI	13102881	13103028	readCounts:339	950	-	13102881	13103028	0	2	50,50	0,97
chrI	13104287	13104433	readCounts:34	950	+	13104287	13104433	0	2	50,50	0,96
chrI	13104427	13104569	readCounts:20	950	+	13104427	13104569	0	2	50,50	0,92
chrI	13104617	13105092	readCounts:23	950	+	13104617	13105092	0	2	50,50	0,425
chrI	13105246	13105406	readCounts:92	950	+	13105246	13105406	0	2	50,50	0,110
chrI	13105478	13105876	readCounts:175	950	+	13105478	13105876	0	2	50,50	0,348
chrI	13105944	13106105	readCounts:321	950	+	13105944	13106105	0	2	50,50	0,111
chrI	13107789	13108023	readCounts:265	950	-	13107789	13108023	0	2	50,50	0,184
chrI	13108301	13108490	readCounts:79	950	-	13108301	13108490	0	2	50,50	0,139
chrI	13108645	13109468	readCounts:34	950	-	13108645	13109468	0	2	50,50	0,773
chrI	13109572	13109822	readCounts:10	950	-	13109572	13109822	0	2	50,50	0,200
chrI	13110624	13111348	readCounts:180	950	-	13110624	13111348	0	2	50,50	0,674
chrI	13111629	13111832	readCounts:95	950	-	13111629	13111832	0	2	50,50	0,153
chrI	13111987	13112195	readCounts:12	950	-	13111987	13112195	0	2	50,50	0,158
chrI	13113672	13114227	readCounts:52	950	+	13113672	13114227	0	2	50,50	0,505
chrI	13114275	13115133	readCounts:63	950	+	13114275	13115133	0	2	50,50	0,808
chrI	13115287	13115540	readCounts:49	950	+	13115287	13115540	0	2	50,50	0,203
chrI	13115612	13115755	readCounts:98	950	+	13115612	13115755	0	2	50,50	0,93
chrI	13115820	13116253	readCounts:165	950	+	13115820	13116253	0	2	50,50	0,383
chrI	13131228	13131819	readCounts:318	950	-	13131228	13131819	0	2	50,50	0,541
chrI	13132100	13132264	readCounts:78	950	-	13132100	13132264	0	2	50,50	0,114
chrI	13136919	13137168	readCounts:5	950	-	13136919	13137168	0	2	50,50	0,199
chrI	13136919	13137327	readCounts:4170	950	-	13136919	13137327	0	2	50,50	0,358
chrI	13137608	13137870	readCounts:1692	950	-	13137608	13137870	0	2	50,50	0,212
chrI	13138025	13138361	readCounts:1376	950	-	13138025	13138361	0	2	50,50	0,286
chrI	13128794	13128936	readCounts:333	950	-	13128794	13128936	0	2	50,50	0,92
chrI	13129199	13129913	readCounts:77	950	-	13129199	13129913	0	2	50,50	0,664
chrI	13130008	13130157	readCounts:49	950	-	13130008	13130157	0	2	50,50	0,99
chrI	13130120	13130301	readCounts:18	950	-	13130120	13130301	0	2	50,50	0,131
chrI	13121158	13121304	readCounts:67	950	+	13121158	13121304	0	2	50,50	0,96
chrI	13121352	13121662	readCounts:51	950	+	13121352	13121662	0	2	50,50	0,260
chrI	13121816	13122259	readCounts:77	950	+	13121816	13122259	0	2	50,50	0,393
chrI	13121816	13122806	readCounts:7	950	+	13121816	13122806	0	2	50,50	0,940
chrI	13122331	13122806	readCounts:122	950	+	13122331	13122806	0	2	50,50	0,425
chrI	13122871	13123220	readCounts:226	950	+	13122871	13123220	0	2	50,50	0,299
chrI	4212747	4212900	readCounts:846	950	+	4212747	4212900	0	2	50,50	0,103
chrI	4212905	4213055	readCounts:1234	950	+	4212905	4213055	0	2	50,50	0,100
chrI	4213157	4213569	readCounts:1532	950	+	4213157	4213569	0	2	50,50	0,362
chrI	4213634	4213782	readCounts:2933	950	+	4213634	4213782	0	2	50,50	0,98
chrI	4213928	4214077	readCounts:5648	950	+	4213928	4214077	0	2	50,50	0,99
chrI	4210997	4211165	readCounts:1250	950	+	4210997	4211165	0	2	50,50	0,118
chrI	4211209	4211356	readCounts:1680	950	+	4211209	4211356	0	2	50,50	0,97
chrI	4211819	4212385	readCounts:23	950	+	4211819	4212385	0	2	50,50	0,516
chrI	4212341	4212492	readCounts:18921	950	+	4212341	4212492	0	2	50,50	0,101
chrI	4203484	4203652	readCounts:113	950	+	4203484	4203652	0	2	50,50	0,118
chrI	4203674	4203821	readCounts:122	950	+	4203674	4203821	0	2	50,50	0,97
chrI	4203848	4204006	readCounts:123	950	+	4203848	4204006	0	2	50,50	0,108
chrI	4204006	4204160	readCounts:247	950	+	4204006	4204160	0	2	50,50	0,104
chrI	4204190	4204777	readCounts:221	950	+	4204190	4204777	0	2	50,50	0,537
chrI	4205261	4205862	readCounts:431	950	+	4205261	4205862	0	2	50,50	0,551
chrI	4206413	4206587	readCounts:59	950	+	4206413	4206587	0	2	50,50	0,124
chrI	4206413	4207004	readCounts:977	950	+	4206413	4207004	0	2	50,50	0,541
chrI	4206580	4207004	readCounts:59	950	+	4206580	4207004	0	2	50,50	0,374
chrI	4207346	4207497	readCounts:2173	950	+	4207346	4207497	0	2	50,50	0,101
chrI	4207542	4208079	readCounts:2655	950	+	4207542	4208079	0	2	50,50	0,487
chrI	4208030	4208179	readCounts:5	950	+	4208030	4208179	0	2	50,50	0,99
chrI	4193275	4193985	readCounts:5112	950	+	4193275	4193985	0	2	50,50	0,660
chrI	4193984	4194130	readCounts:14	950	+	4193984	4194130	0	2	50,50	0,96
chrI	4193984	4194473	readCounts:7746	950	+	4193984	4194473	0	2	50,50	0,439
chrI	4194471	4194760	readCounts:7917	950	+	4194471	4194760	0	2	50,50	0,239
chrI	4194716	4195636	readCounts:12	950	+	4194716	4195636	0	2	50,50	0,870
chrI	4194826	4195636	readCounts:8555	950	+	4194826	4195636	0	2	50,50	0,760
chrI	4195659	4196560	readCounts:12773	950	+	4195659	4196560	0	2	50,50	0,851
chrI	4196532	4197016	readCounts:25	950	+	4196532	4197016	0	2	50,50	0,434
chrI	4196581	4197016	readCounts:14642	950	+	4196581	4197016	0	2	50,50	0,385
chrI	4196999	4197148	readCounts:14153	950	+	4196999	4197148	0	2	50,50	0,99
chrI	4197214	4198573	readCounts:38	950	+	4197214	4198573	0	2	50,50	0,1309
chrI	4197214	4203159	readCounts:18714	950	+	4197214	4203159	0	2	50,50	0,5895
chrI	4200317	4200603	readCounts:5	950	+	4200317	4200603	0	2	50,50	0,236
chrI	4200342	4200603	readCounts:67	950	+	4200342	4200603	0	2	50,50	0,211
chrI	4200342	4203159	readCounts:32	950	+	4200342	4203159	0	2	50,50	0,2767
chrI	4200503	4200669	readCounts:5	950	+	4200503	4200669	0	2	50,50	0,116
chrI	4200693	4203159	readCounts:32	950	+	4200693	4203159	0	2	50,50	0,2416
chrI	4200987	4203159	readCounts:5	950	+	4200987	4203159	0	2	50,50	0,2122
chrI	4201263	4203159	readCounts:12	950	+	4201263	4203159	0	2	50,50	0,1846
chrI	4201964	4203159	readCounts:7	950	+	4201964	4203159	0	2	50,50	0,1145
chrI	4202860	4203159	readCounts:40	950	+	4202860	4203159	0	2	50,50	0,249
chrI	4190192	4190345	readCounts:1173	950	+	4190192	4190345	0	2	50,50	0,103
chrI	4190370	4190522	readCounts:1497	950	+	4190370	4190522	0	2	50,50	0,102
chrI	4190615	4191261	readCounts:2290	950	+	4190615	4191261	0	2	50,50	0,596
chrI	4191622	4192728	readCounts:445	950	+	4191622	4192728	0	2	50,50	0,1056
chrI	4191787	4192728	readCounts:13615	950	+	4191787	4192728	0	2	50,50	0,891
chrI	4185179	4186598	readCounts:32	950	+	4185179	4186598	0	2	50,50	0,1369
chrI	4186631	4186819	readCounts:183	950	+	4186631	4186819	0	2	50,50	0,138
chrI	4186666	4186819	readCounts:8	950	+	4186666	4186819	0	2	50,50	0,103
chrI	4186973	4187215	readCounts:700	950	+	4186973	4187215	0	2	50,50	0,192
chrI	4187315	4187461	readCounts:2178	950	+	4187315	4187461	0	2	50,50	0,96
chrI	4187421	4187569	readCounts:2488	950	+	4187421	4187569	0	2	50,50	0,98
chrI	4187588	4187744	readCounts:1802	950	+	4187588	4187744	0	2	50,50	0,106
chrI	4188087	4188235	readCounts:2518	950	+	4188087	4188235	0	2	50,50	0,98
chrI	4188422	4188567	readCounts:3734	950	+	4188422	4188567	0	2	50,50	0,95
chrI	4188422	4188569	readCounts:22	950	+	4188422	4188569	0	2	50,50	0,97
chrI	4188864	4189010	readCounts:6306	950	+	4188864	4189010	0	2	50,50	0,96
chrI	4189566	4189712	readCounts:11244	950	+	4189566	4189712	0	2	50,50	0,96
chrI	4208645	4208800	readCounts:14	950	-	4208645	4208800	0	2	50,50	0,105
chrI	4208745	4209186	readCounts:2876	950	-	4208745	4209186	0	2	50,50	0,391
chrI	4208753	4209186	readCounts:71	950	-	4208753	4209186	0	2	50,50	0,383
chrI	4209172	4209321	readCounts:3926	950	-	4209172	4209321	0	2	50,50	0,99
chrI	4209365	4209646	readCounts:2381	950	-	4209365	4209646	0	2	50,50	0,231
chrI	4209934	4210085	readCounts:1042	950	-	4209934	4210085	0	2	50,50	0,101
chrI	4210109	4210259	readCounts:1531	950	-	4210109	4210259	0	2	50,50	0,100
chrI	4214447	4214593	readCounts:7908	950	-	4214447	4214593	0	2	50,50	0,96
chrI	4214551	4214701	readCounts:8424	950	-	4214551	4214701	0	2	50,50	0,100
chrI	4214768	4214921	readCounts:5397	950	-	4214768	4214921	0	2	50,50	0,103
chrI	4214780	4214921	readCounts:385	950	-	4214780	4214921	0	2	50,50	0,91
chrI	4214943	4215090	readCounts:4753	950	-	4214943	4215090	0	2	50,50	0,97
chrI	4215044	4215194	readCounts:24	950	-	4215044	4215194	0	2	50,50	0,100
chrI	4215056	4215246	readCounts:90	950	-	4215056	4215246	0	2	50,50	0,140
chrI	4215101	4215246	readCounts:2488	950	-	4215101	4215246	0	2	50,50	0,95
chrI	4215110	4215246	readCounts:70	950	-	4215110	4215246	0	2	50,50	0,86
chrI	4215282	4215430	readCounts:2830	950	-	4215282	4215430	0	2	50,50	0,98
chrI	4215524	4215683	readCounts:1307	950	-	4215524	4215683	0	2	50,50	0,109
chrI	5401840	5402273	readCounts:10225	950	+	5401840	5402273	0	2	50,50	0,383
chrI	5402265	5402415	readCounts:6	950	+	5402265	5402415	0	2	50,50	0,100
chrI	5402457	5402604	readCounts:12983	950	+	5402457	5402604	0	2	50,50	0,97
chrI	5403405	5403560	readCounts:20598	950	-	5403405	5403560	0	2	50,50	0,105
chrI	5403634	5403943	readCounts:14022	950	-	5403634	5403943	0	2	50,50	0,259
chrI	5403915	5404285	readCounts:657	950	-	5403915	5404285	0	2	50,50	0,320
chrI	5403915	5404306	readCounts:4128	950	-	5403915	5404306	0	2	50,50	0,341
chrI	5403915	5404570	readCounts:2471	950	-	5403915	5404570	0	2	50,50	0,605
chrI	5403915	5405364	readCounts:4946	950	-	5403915	5405364	0	2	50,50	0,1399
chrI	5404305	5404570	readCounts:3079	950	-	5404305	5404570	0	2	50,50	0,215
chrI	5404305	5405364	readCounts:593	950	-	5404305	5405364	0	2	50,50	0,1009
chrI	5404316	5404570	readCounts:36	950	-	5404316	5404570	0	2	50,50	0,204
chrI	5404557	5405364	readCounts:3746	950	-	5404557	5405364	0	2	50,50	0,757
chrI	5405332	5405482	readCounts:7040	950	-	5405332	5405482	0	2	50,50	0,100
chrI	5405472	5405621	readCounts:4679	950	-	5405472	5405621	0	2	50,50	0,99
chrI	5405655	5405803	readCounts:2811	950	-	5405655	5405803	0	2	50,50	0,98
chrI	5405883	5406027	readCounts:1874	950	-	5405883	5406027	0	2	50,50	0,94
chrI	5406058	5406450	readCounts:1611	950	-	5406058	5406450	0	2	50,50	0,342
chrI	5406596	5406746	readCounts:1057	950	-	5406596	5406746	0	2	50,50	0,100
chrI	5406734	5406881	readCounts:852	950	-	5406734	5406881	0	2	50,50	0,97
chrI	5407000	5407177	readCounts:668	950	-	5407000	5407177	0	2	50,50	0,127
chrI	5407153	5407529	readCounts:287	950	-	5407153	5407529	0	2	50,50	0,326
chrI	5407153	5407622	readCounts:199	950	-	5407153	5407622	0	2	50,50	0,419
chrI	5407453	5407622	readCounts:250	950	-	5407453	5407622	0	2	50,50	0,119
chrI	5407574	5408028	readCounts:454	950	-	5407574	5408028	0	2	50,50	0,404
chrI	5408033	5408199	readCounts:378	950	-	5408033	5408199	0	2	50,50	0,116
chrI	5408181	5408332	readCounts:420	950	-	5408181	5408332	0	2	50,50	0,101
chrI	5413157	5413304	readCounts:35325	950	-	5413157	5413304	0	2	50,50	0,97
chrI	5413386	5413646	readCounts:23324	950	-	5413386	5413646	0	2	50,50	0,210
chrI	5413690	5413833	readCounts:29	950	-	5413690	5413833	0	2	50,50	0,93
chrI	5413690	5413836	readCounts:16021	950	-	5413690	5413836	0	2	50,50	0,96
chrI	5413872	5414069	readCounts:11636	950	-	5413872	5414069	0	2	50,50	0,147
chrI	5414076	5414545	readCounts:71	950	-	5414076	5414545	0	2	50,50	0,419
chrI	5414080	5414545	readCounts:10259	950	-	5414080	5414545	0	2	50,50	0,415
chrI	5414549	5414694	readCounts:5976	950	-	5414549	5414694	0	2	50,50	0,95
chrI	5414686	5415103	readCounts:4523	950	-	5414686	5415103	0	2	50,50	0,367
chrI	5415080	5415227	readCounts:3441	950	-	5415080	5415227	0	2	50,50	0,97
chrI	5415241	5415394	readCounts:3274	950	-	5415241	5415394	0	2	50,50	0,103
chrI	5415391	5415541	readCounts:2873	950	-	5415391	5415541	0	2	50,50	0,100
chrI	4109430	4109573	readCounts:30	950	+	4109430	4109573	0	2	50,50	0,93
chrI	4109607	4109752	readCounts:26	950	+	4109607	4109752	0	2	50,50	0,95
chrI	4109698	4109842	readCounts:23	950	+	4109698	4109842	0	2	50,50	0,94
chrI	4109851	4110060	readCounts:19	950	+	4109851	4110060	0	2	50,50	0,159
chrI	4110048	4110195	readCounts:27	950	+	4110048	4110195	0	2	50,50	0,97
chrI	4110327	4110474	readCounts:21	950	+	4110327	4110474	0	2	50,50	0,97
chrI	4110693	4111071	readCounts:17	950	+	4110693	4111071	0	2	50,50	0,328
chrI	4111137	4111293	readCounts:70	950	+	4111137	4111293	0	2	50,50	0,106
chrI	4111259	4111401	readCounts:86	950	+	4111259	4111401	0	2	50,50	0,92
chrI	4111464	4111858	readCounts:140	950	+	4111464	4111858	0	2	50,50	0,344
chrI	4111850	4111998	readCounts:143	950	+	4111850	4111998	0	2	50,50	0,98
chrI	4112044	4112193	readCounts:233	950	+	4112044	4112193	0	2	50,50	0,99
chrI	4112161	4112311	readCounts:189	950	+	4112161	4112311	0	2	50,50	0,100
chrI	4103769	4104534	readCounts:51	950	+	4103769	4104534	0	2	50,50	0,715
chrI	4104580	4104724	readCounts:83	950	+	4104580	4104724	0	2	50,50	0,94
chrI	4104670	4104837	readCounts:78	950	+	4104670	4104837	0	2	50,50	0,117
chrI	4104846	4104998	readCounts:96	950	+	4104846	4104998	0	2	50,50	0,102
chrI	4104986	4105132	readCounts:151	950	+	4104986	4105132	0	2	50,50	0,96
chrI	4105264	4105868	readCounts:247	950	+	4105264	4105868	0	2	50,50	0,554
chrI	4106087	4106505	readCounts:462	950	+	4106087	4106505	0	2	50,50	0,368
chrI	4106571	4106726	readCounts:622	950	+	4106571	4106726	0	2	50,50	0,105
chrI	4106695	4106839	readCounts:881	950	+	4106695	4106839	0	2	50,50	0,94
chrI	4106902	4107090	readCounts:1349	950	+	4106902	4107090	0	2	50,50	0,138
chrI	4107082	4107228	readCounts:1493	950	+	4107082	4107228	0	2	50,50	0,96
chrI	4107274	4107425	readCounts:1625	950	+	4107274	4107425	0	2	50,50	0,101
chrI	4107393	4107860	readCounts:1789	950	+	4107393	4107860	0	2	50,50	0,417
chrI	4095113	4095642	readCounts:6	950	+	4095113	4095642	0	2	50,50	0,479
chrI	4095896	4096044	readCounts:6	950	+	4095896	4096044	0	2	50,50	0,98
chrI	4096065	4096321	readCounts:36	950	+	4096065	4096321	0	2	50,50	0,206
chrI	4096543	4096691	readCounts:70	950	+	4096543	4096691	0	2	50,50	0,98
chrI	4096757	4097037	readCounts:126	950	+	4096757	4097037	0	2	50,50	0,230
chrI	4097593	4097950	readCounts:307	950	+	4097593	4097950	0	2	50,50	0,307
chrI	10162435	10162581	readCounts:4534	950	+	10162435	10162581	0	2	50,50	0,96
chrI	10162435	10162590	readCounts:90	950	+	10162435	10162590	0	2	50,50	0,105
chrI	10162580	10162726	readCounts:4107	950	+	10162580	10162726	0	2	50,50	0,96
chrI	10162882	10163027	readCounts:8375	950	+	10162882	10163027	0	2	50,50	0,95
chrI	10187880	10188028	readCounts:83240	950	-	10187880	10188028	0	2	50,50	0,98
chrI	10188357	10188817	readCounts:29	950	-	10188357	10188817	0	2	50,50	0,410
chrI	10188750	10189312	readCounts:91	950	-	10188750	10189312	0	2	50,50	0,512
chrI	10188846	10189312	readCounts:502	950	-	10188846	10189312	0	2	50,50	0,416
chrI	10188936	10189312	readCounts:5	950	-	10188936	10189312	0	2	50,50	0,326
chrI	10189023	10189312	readCounts:17	950	-	10189023	10189312	0	2	50,50	0,239
chrI	10189023	10189402	readCounts:5	950	-	10189023	10189402	0	2	50,50	0,329
chrI	10189116	10190041	readCounts:163	950	-	10189116	10190041	0	2	50,50	0,875
chrI	10189212	10189489	readCounts:18	950	-	10189212	10189489	0	2	50,50	0,227
chrI	10189389	10189675	readCounts:17	950	-	10189389	10189675	0	2	50,50	0,236
chrI	10189482	10189675	readCounts:7	950	-	10189482	10189675	0	2	50,50	0,143
chrI	10189575	10189768	readCounts:38	950	-	10189575	10189768	0	2	50,50	0,143
chrI	10190082	10190231	readCounts:817	950	-	10190082	10190231	0	2	50,50	0,99
chrI	10190458	10190606	readCounts:403	950	-	10190458	10190606	0	2	50,50	0,98
chrI	10190668	10190816	readCounts:306	950	-	10190668	10190816	0	2	50,50	0,98
chrI	10194436	10195021	readCounts:4641	950	-	10194436	10195021	0	2	50,50	0,535
chrI	10194436	10195134	readCounts:7	950	-	10194436	10195134	0	2	50,50	0,648
chrI	10194990	10195134	readCounts:5	950	-	10194990	10195134	0	2	50,50	0,94
chrI	10195126	10195273	readCounts:26	950	-	10195126	10195273	0	2	50,50	0,97
chrI	10195130	10195273	readCounts:4363	950	-	10195130	10195273	0	2	50,50	0,93
chrI	10195415	10195799	readCounts:2694	950	-	10195415	10195799	0	2	50,50	0,334
chrI	10195817	10195968	readCounts:1960	950	-	10195817	10195968	0	2	50,50	0,101
chrI	10196180	10196724	readCounts:958	950	-	10196180	10196724	0	2	50,50	0,494
chrI	10196733	10196996	readCounts:998	950	-	10196733	10196996	0	2	50,50	0,213
chrI	10191639	10191785	readCounts:26	950	-	10191639	10191785	0	2	50,50	0,96
chrI	10191707	10191853	readCounts:12395	950	-	10191707	10191853	0	2	50,50	0,96
chrI	10191928	10192075	readCounts:6040	950	-	10191928	10192075	0	2	50,50	0,97
chrI	10191940	10192075	readCounts:15	950	-	10191940	10192075	0	2	50,50	0,85
chrI	10192063	10192212	readCounts:28	950	-	10192063	10192212	0	2	50,50	0,99
chrI	10192063	10192220	readCounts:2451	950	-	10192063	10192220	0	2	50,50	0,107
chrI	10192078	10192220	readCounts:2157	950	-	10192078	10192220	0	2	50,50	0,92
chrI	10192242	10192394	readCounts:73	950	-	10192242	10192394	0	2	50,50	0,102
chrI	10192532	10192683	readCounts:115	950	-	10192532	10192683	0	2	50,50	0,101
chrI	10192537	10192683	readCounts:5538	950	-	10192537	10192683	0	2	50,50	0,96
chrI	10192689	10192844	readCounts:2494	950	-	10192689	10192844	0	2	50,50	0,105
chrI	10193411	10193606	readCounts:12679	950	+	10193411	10193606	0	2	50,50	0,145
chrI	10179268	10179416	readCounts:174040	950	+	10179268	10179416	0	2	50,50	0,98
chrI	10179468	10179615	readCounts:208181	950	+	10179468	10179615	0	2	50,50	0,97
chrI	10179468	10179617	readCounts:72	950	+	10179468	10179617	0	2	50,50	0,99
chrI	10179468	10179619	readCounts:33	950	+	10179468	10179619	0	2	50,50	0,101
chrI	10179468	10179626	readCounts:8	950	+	10179468	10179626	0	2	50,50	0,108
chrI	10163947	10164257	readCounts:1568	950	-	10163947	10164257	0	2	50,50	0,260
chrI	10164286	10164971	readCounts:1114	950	-	10164286	10164971	0	2	50,50	0,635
chrI	10160472	10160905	readCounts:8082	950	-	10160472	10160905	0	2	50,50	0,383
chrI	10160985	10161168	readCounts:5222	950	-	10160985	10161168	0	2	50,50	0,133
chrI	10161247	10161414	readCounts:2866	950	-	10161247	10161414	0	2	50,50	0,117
chrI	10161424	10161571	readCounts:2238	950	-	10161424	10161571	0	2	50,50	0,97
chrI	10161597	10161802	readCounts:1586	950	-	10161597	10161802	0	2	50,50	0,155
chrI	10170015	10170168	readCounts:23877	950	-	10170015	10170168	0	2	50,50	0,103
chrI	10170289	10170888	readCounts:37	950	-	10170289	10170888	0	2	50,50	0,549
chrI	10170317	10170784	readCounts:20155	950	-	10170317	10170784	0	2	50,50	0,417
chrI	10170887	10171072	readCounts:6	950	-	10170887	10171072	0	2	50,50	0,135
chrI	10170924	10171072	readCounts:13782	950	-	10170924	10171072	0	2	50,50	0,98
chrI	10171074	10171889	readCounts:7819	950	-	10171074	10171889	0	2	50,50	0,765
chrI	10171074	10172172	readCounts:5	950	-	10171074	10172172	0	2	50,50	0,1048
chrI	10171074	10172538	readCounts:45	950	-	10171074	10172538	0	2	50,50	0,1414
chrI	10172005	10172172	readCounts:5781	950	-	10172005	10172172	0	2	50,50	0,117
chrI	10172359	10172538	readCounts:3306	950	-	10172359	10172538	0	2	50,50	0,129
chrI	10177240	10177392	readCounts:9001	950	+	10177240	10177392	0	2	50,50	0,102
chrI	10177409	10177575	readCounts:5	950	+	10177409	10177575	0	2	50,50	0,116
chrI	10177427	10177575	readCounts:9410	950	+	10177427	10177575	0	2	50,50	0,98
chrI	10177579	10177726	readCounts:8970	950	+	10177579	10177726	0	2	50,50	0,97
chrI	10177671	10177827	readCounts:5	950	+	10177671	10177827	0	2	50,50	0,106
chrI	10177785	10177927	readCounts:8	950	+	10177785	10177927	0	2	50,50	0,92
chrI	10178013	10178161	readCounts:14415	950	+	10178013	10178161	0	2	50,50	0,98
chrI	10178215	10178559	readCounts:48	950	+	10178215	10178559	0	2	50,50	0,294
chrI	10178219	10178559	readCounts:18776	950	+	10178219	10178559	0	2	50,50	0,290
chrI	10180010	10180156	readCounts:370	950	+	10180010	10180156	0	2	50,50	0,96
chrI	10180138	10180286	readCounts:369	950	+	10180138	10180286	0	2	50,50	0,98
chrI	10180257	10180405	readCounts:331	950	+	10180257	10180405	0	2	50,50	0,98
chrI	10180623	10180769	readCounts:313	950	+	10180623	10180769	0	2	50,50	0,96
chrI	10180963	10181108	readCounts:626	950	+	10180963	10181108	0	2	50,50	0,95
chrI	10181269	10181417	readCounts:757	950	+	10181269	10181417	0	2	50,50	0,98
chrI	10181558	10182095	readCounts:1226	950	+	10181558	10182095	0	2	50,50	0,487
chrI	10183189	10183338	readCounts:12502	950	+	10183189	10183338	0	2	50,50	0,99
chrI	10183315	10183463	readCounts:16718	950	+	10183315	10183463	0	2	50,50	0,98
chrI	10183598	10183748	readCounts:27441	950	+	10183598	10183748	0	2	50,50	0,100
chrI	10184779	10184924	readCounts:12	950	-	10184779	10184924	0	2	50,50	0,95
chrI	10184779	10184928	readCounts:35937	950	-	10184779	10184928	0	2	50,50	0,99
chrI	10185195	10185345	readCounts:28708	950	-	10185195	10185345	0	2	50,50	0,100
chrI	10185208	10185345	readCounts:113	950	-	10185208	10185345	0	2	50,50	0,87
chrI	10185927	10186076	readCounts:2013	950	+	10185927	10186076	0	2	50,50	0,99
chrI	10186146	10186293	readCounts:2379	950	+	10186146	10186293	0	2	50,50	0,97
chrI	10186305	10186452	readCounts:2612	950	+	10186305	10186452	0	2	50,50	0,97
chrI	10186441	10186592	readCounts:3415	950	+	10186441	10186592	0	2	50,50	0,101
chrI	10186717	10186866	readCounts:5	950	+	10186717	10186866	0	2	50,50	0,99
chrI	10186719	10186866	readCounts:6293	950	+	10186719	10186866	0	2	50,50	0,97
chrI	10186868	10187011	readCounts:6387	950	+	10186868	10187011	0	2	50,50	0,93
chrI	10187029	10187183	readCounts:8334	950	+	10187029	10187183	0	2	50,50	0,104
chrI	10187167	10187309	readCounts:7633	950	+	10187167	10187309	0	2	50,50	0,92
chrI	10187167	10187321	readCounts:3656	950	+	10187167	10187321	0	2	50,50	0,104
chrI	7495517	7495663	readCounts:72	950	+	7495517	7495663	0	2	50,50	0,96
chrI	7496561	7496713	readCounts:74	950	+	7496561	7496713	0	2	50,50	0,102
chrI	7496956	7497112	readCounts:68	950	+	7496956	7497112	0	2	50,50	0,106
chrI	7497539	7497717	readCounts:77	950	+	7497539	7497717	0	2	50,50	0,128
chrI	7498563	7498711	readCounts:558	950	+	7498563	7498711	0	2	50,50	0,98
chrI	7499369	7499661	readCounts:639	950	+	7499369	7499661	0	2	50,50	0,242
chrI	7499737	7499886	readCounts:1153	950	+	7499737	7499886	0	2	50,50	0,99
chrI	7499887	7500034	readCounts:1210	950	+	7499887	7500034	0	2	50,50	0,97
[truncated: 143,812 more rows]

## Sheet: neuron_all
track name=neuron description='neuron_junctions'
chrII	1861	2555	neuroPSI:1;readCounts:6	950	+	1861	2555	0	2	50,50	0,644
chrII	2644	2787	neuroPSI:1;readCounts:38	950	+	2644	2787	0	2	50,50	0,93
chrII	2838	2980	neuroPSI:1;readCounts:39	950	+	2838	2980	0	2	50,50	0,92
chrII	2986	3455	neuroPSI:1;readCounts:58	950	+	2986	3455	0	2	50,50	0,419
chrII	3502	3851	neuroPSI:1;readCounts:83	950	+	3502	3851	0	2	50,50	0,299
chrII	3934	4250	neuroPSI:1;readCounts:88	950	+	3934	4250	0	2	50,50	0,266
chrII	15268504	15269508	neuroPSI:1;readCounts:692	950	+	15268504	15269508	0	2	50,50	0,954
chrII	15269744	15269909	neuroPSI:1;readCounts:992	950	+	15269744	15269909	0	2	50,50	0,115
chrII	15269981	15270845	neuroPSI:1;readCounts:1002	950	+	15269981	15270845	0	2	50,50	0,814
chrII	15270923	15271591	neuroPSI:0.008;readCounts:7	950	+	15270923	15271591	0	2	50,50	0,618
chrII	15270923	15273092	neuroPSI:0.152;readCounts:134	950	+	15270923	15273092	0	2	50,50	0,2119
chrII	15270923	15274429	neuroPSI:0.84;readCounts:743	950	+	15270923	15274429	0	2	50,50	0,3456
chrII	15274466	15275078	neuroPSI:1;readCounts:949	950	+	15274466	15275078	0	2	50,50	0,562
chrII	15275254	15275401	neuroPSI:1;readCounts:174	950	+	15275254	15275401	0	2	50,50	0,97
chrII	15275409	15275583	neuroPSI:1;readCounts:30	950	+	15275409	15275583	0	2	50,50	0,124
chrIII	13780513	13780664	neuroPSI:0.018;readCounts:5	950	+	13780513	13780664	0	2	50,50	0,101
chrIII	13780513	13780672	neuroPSI:0.777;readCounts:276	950	+	13780513	13780672	0	2	50,50	0,109
chrIII	13780525	13780672	neuroPSI:0.223;readCounts:79	950	+	13780525	13780672	0	2	50,50	0,97
chrIII	13780820	13780969	neuroPSI:1;readCounts:475	950	+	13780820	13780969	0	2	50,50	0,99
chrIII	13782877	13783403	neuroPSI:1;readCounts:7	950	+	13782877	13783403	0	2	50,50	0,476
chrIV	17487071	17487273	neuroPSI:1;readCounts:66	950	-	17487071	17487273	0	2	50,50	0,152
chrIV	17487294	17487445	neuroPSI:1;readCounts:73	950	-	17487294	17487445	0	2	50,50	0,101
chrIV	17487501	17488128	neuroPSI:1;readCounts:93	950	-	17487501	17488128	0	2	50,50	0,577
chrIV	17488114	17488278	neuroPSI:1;readCounts:44	950	-	17488114	17488278	0	2	50,50	0,114
chrIV	17488309	17488457	neuroPSI:1;readCounts:41	950	-	17488309	17488457	0	2	50,50	0,98
chrIV	17488475	17489028	neuroPSI:0.233;readCounts:7	950	-	17488475	17489028	0	2	50,50	0,503
chrIV	17488475	17489032	neuroPSI:0.767;readCounts:23	950	-	17488475	17489032	0	2	50,50	0,507
chrIV	17489020	17489164	neuroPSI:1;readCounts:37	950	-	17489020	17489164	0	2	50,50	0,94
chrIV	17489117	17490405	neuroPSI:1;readCounts:20	950	-	17489117	17490405	0	2	50,50	0,1238
chrIV	17480439	17480582	neuroPSI:1;readCounts:304	950	-	17480439	17480582	0	2	50,50	0,93
chrIV	17480559	17481211	neuroPSI:1;readCounts:318	950	-	17480559	17481211	0	2	50,50	0,602
chrIV	17481541	17481686	neuroPSI:1;readCounts:140	950	-	17481541	17481686	0	2	50,50	0,95
chrIV	17481859	17482013	neuroPSI:1;readCounts:84	950	-	17481859	17482013	0	2	50,50	0,104
chrIV	17482029	17482358	neuroPSI:1;readCounts:48	950	-	17482029	17482358	0	2	50,50	0,279
chrIV	17482311	17482458	neuroPSI:1;readCounts:44	950	-	17482311	17482458	0	2	50,50	0,97
chrIV	17482467	17482983	neuroPSI:0.884;readCounts:38	950	-	17482467	17482983	0	2	50,50	0,466
chrIV	17482840	17482983	neuroPSI:0.116;readCounts:5	950	-	17482840	17482983	0	2	50,50	0,93
chrIV	17482937	17483323	neuroPSI:1;readCounts:24	950	-	17482937	17483323	0	2	50,50	0,336
chrV	10368697	10368850	neuroPSI:1;readCounts:9	950	+	10368697	10368850	0	2	50,50	0,103
chrV	10368879	10369029	neuroPSI:1;readCounts:5	950	+	10368879	10369029	0	2	50,50	0,100
chrV	10369148	10369297	neuroPSI:1;readCounts:20	950	+	10369148	10369297	0	2	50,50	0,99
chrV	10369510	10369655	neuroPSI:1;readCounts:23	950	+	10369510	10369655	0	2	50,50	0,95
chrV	10369670	10369818	neuroPSI:1;readCounts:39	950	+	10369670	10369818	0	2	50,50	0,98
chrV	10384222	10384372	neuroPSI:1;readCounts:10	950	+	10384222	10384372	0	2	50,50	0,100
chrV	10384425	10384574	neuroPSI:1;readCounts:37	950	+	10384425	10384574	0	2	50,50	0,99
chrV	10384721	10384943	neuroPSI:1;readCounts:98	950	+	10384721	10384943	0	2	50,50	0,172
chrV	10385436	10385646	neuroPSI:1;readCounts:107	950	+	10385436	10385646	0	2	50,50	0,160
chrV	10379021	10379167	neuroPSI:0.944;readCounts:85	950	-	10379021	10379167	0	2	50,50	0,96
chrV	10379021	10379244	neuroPSI:0.056;readCounts:5	950	-	10379021	10379244	0	2	50,50	0,173
chrV	10379236	10379388	neuroPSI:1;readCounts:81	950	-	10379236	10379388	0	2	50,50	0,102
chrV	10372515	10372660	neuroPSI:1;readCounts:28	950	+	10372515	10372660	0	2	50,50	0,95
chrV	10372674	10372819	neuroPSI:1;readCounts:47	950	+	10372674	10372819	0	2	50,50	0,95
chrV	10373036	10373185	neuroPSI:1;readCounts:101	950	+	10373036	10373185	0	2	50,50	0,99
chrV	10373256	10373402	neuroPSI:1;readCounts:250	950	+	10373256	10373402	0	2	50,50	0,96
chrV	10373462	10373667	neuroPSI:1;readCounts:185	950	+	10373462	10373667	0	2	50,50	0,155
chrV	10381599	10381781	neuroPSI:1;readCounts:139	950	-	10381599	10381781	0	2	50,50	0,132
chrV	10382481	10382802	neuroPSI:1;readCounts:54	950	+	10382481	10382802	0	2	50,50	0,271
chrV	10389927	10390226	neuroPSI:1;readCounts:11	950	+	10389927	10390226	0	2	50,50	0,249
chrV	10390301	10390447	neuroPSI:1;readCounts:6	950	+	10390301	10390447	0	2	50,50	0,96
chrV	10390955	10391106	neuroPSI:1;readCounts:5	950	+	10390955	10391106	0	2	50,50	0,101
chrV	10391469	10391612	neuroPSI:1;readCounts:20	950	+	10391469	10391612	0	2	50,50	0,93
chrV	10391713	10391855	neuroPSI:1;readCounts:20	950	+	10391713	10391855	0	2	50,50	0,92
chrV	10392424	10392569	neuroPSI:1;readCounts:81	950	+	10392424	10392569	0	2	50,50	0,95
chrV	10392690	10392835	neuroPSI:1;readCounts:116	950	+	10392690	10392835	0	2	50,50	0,95
chrV	10393648	10393804	neuroPSI:1;readCounts:9	950	-	10393648	10393804	0	2	50,50	0,106
chrV	10394213	10394925	neuroPSI:1;readCounts:7	950	-	10394213	10394925	0	2	50,50	0,662
chrV	10395945	10396088	neuroPSI:1;readCounts:11	950	+	10395945	10396088	0	2	50,50	0,93
chrV	10396105	10396251	neuroPSI:1;readCounts:6	950	+	10396105	10396251	0	2	50,50	0,96
chrV	10396194	10396338	neuroPSI:1;readCounts:11	950	+	10396194	10396338	0	2	50,50	0,94
chrV	10396436	10396631	neuroPSI:1;readCounts:12	950	+	10396436	10396631	0	2	50,50	0,145
chrV	10396913	10397058	neuroPSI:1;readCounts:45	950	+	10396913	10397058	0	2	50,50	0,95
chrV	10397098	10397241	neuroPSI:1;readCounts:86	950	+	10397098	10397241	0	2	50,50	0,93
chrV	10397460	10397606	neuroPSI:1;readCounts:108	950	+	10397460	10397606	0	2	50,50	0,96
chrV	10398912	10399059	neuroPSI:1;readCounts:10	950	+	10398912	10399059	0	2	50,50	0,97
chrV	10399028	10399280	neuroPSI:1;readCounts:11	950	+	10399028	10399280	0	2	50,50	0,202
chrV	10399384	10399749	neuroPSI:1;readCounts:6	950	+	10399384	10399749	0	2	50,50	0,315
chrV	10399739	10399882	neuroPSI:1;readCounts:24	950	+	10399739	10399882	0	2	50,50	0,93
chrV	10399890	10400065	neuroPSI:1;readCounts:33	950	+	10399890	10400065	0	2	50,50	0,125
chrV	10400347	10400493	neuroPSI:1;readCounts:53	950	+	10400347	10400493	0	2	50,50	0,96
chrV	10400533	10400684	neuroPSI:1;readCounts:56	950	+	10400533	10400684	0	2	50,50	0,101
chrV	10400670	10400818	neuroPSI:1;readCounts:60	950	+	10400670	10400818	0	2	50,50	0,98
chrV	10400951	10401094	neuroPSI:1;readCounts:112	950	+	10400951	10401094	0	2	50,50	0,93
chrIV	5113087	5113360	neuroPSI:1;readCounts:763	950	-	5113087	5113360	0	2	50,50	0,223
chrIV	5113341	5113865	neuroPSI:1;readCounts:889	950	-	5113341	5113865	0	2	50,50	0,474
chrIV	5113957	5114824	neuroPSI:0.19;readCounts:124	950	-	5113957	5114824	0	2	50,50	0,817
chrIV	5114002	5114824	neuroPSI:0.81;readCounts:530	950	-	5114002	5114824	0	2	50,50	0,772
chrIV	5114904	5115441	neuroPSI:1;readCounts:337	950	-	5114904	5115441	0	2	50,50	0,487
chrIV	5115605	5117479	neuroPSI:1;readCounts:219	950	-	5115605	5117479	0	2	50,50	0,1824
chrIV	5117482	5118714	neuroPSI:1;readCounts:208	950	-	5117482	5118714	0	2	50,50	0,1182
chrIV	5118703	5121931	neuroPSI:1;readCounts:125	950	-	5118703	5121931	0	2	50,50	0,3178
chrIV	5127572	5129076	neuroPSI:1;readCounts:2545	950	-	5127572	5129076	0	2	50,50	0,1454
chrIV	5129327	5129798	neuroPSI:1;readCounts:1473	950	-	5129327	5129798	0	2	50,50	0,421
chrIV	5129918	5130482	neuroPSI:1;readCounts:887	950	-	5129918	5130482	0	2	50,50	0,514
chrIV	5130585	5131348	neuroPSI:1;readCounts:836	950	-	5130585	5131348	0	2	50,50	0,713
chrIV	5131465	5131812	neuroPSI:1;readCounts:421	950	-	5131465	5131812	0	2	50,50	0,297
chrIV	5131865	5132154	neuroPSI:1;readCounts:448	950	-	5131865	5132154	0	2	50,50	0,239
chrIV	5132186	5133637	neuroPSI:0.671;readCounts:202	950	-	5132186	5133637	0	2	50,50	0,1401
chrIV	5132186	5144764	neuroPSI:0.329;readCounts:99	950	-	5132186	5144764	0	2	50,50	0,12528
chrIV	5133807	5144764	neuroPSI:0.057;readCounts:6	950	-	5133807	5144764	0	2	50,50	0,10907
chrIV	5144802	5149572	neuroPSI:0.061;readCounts:6	950	-	5144802	5149572	0	2	50,50	0,4720
chrIV	5144802	5152256	neuroPSI:0.939;readCounts:92	950	-	5144802	5152256	0	2	50,50	0,7404
chrIV	5111811	5111959	neuroPSI:1;readCounts:61	950	+	5111811	5111959	0	2	50,50	0,98
chrIV	5111920	5112068	neuroPSI:1;readCounts:114	950	+	5111920	5112068	0	2	50,50	0,98
chrIV	5112094	5112240	neuroPSI:1;readCounts:125	950	+	5112094	5112240	0	2	50,50	0,96
chrIV	5112401	5112685	neuroPSI:1;readCounts:172	950	+	5112401	5112685	0	2	50,50	0,234
chrX	242319	242465	neuroPSI:1;readCounts:10	950	-	242319	242465	0	2	50,50	0,96
chrX	242619	243049	neuroPSI:1;readCounts:13	950	-	242619	243049	0	2	50,50	0,380
chrX	246640	246785	neuroPSI:1;readCounts:60	950	-	246640	246785	0	2	50,50	0,95
chrX	246861	247860	neuroPSI:0.7;readCounts:21	950	-	246861	247860	0	2	50,50	0,949
chrX	246861	250750	neuroPSI:0.3;readCounts:9	950	-	246861	250750	0	2	50,50	0,3839
chrX	248116	250750	neuroPSI:0.654;readCounts:17	950	-	248116	250750	0	2	50,50	0,2584
chrX	251201	251939	neuroPSI:1;readCounts:53	950	-	251201	251939	0	2	50,50	0,688
chrX	252559	252724	neuroPSI:1;readCounts:30	950	-	252559	252724	0	2	50,50	0,115
chrX	227119	227265	neuroPSI:1;readCounts:14	950	-	227119	227265	0	2	50,50	0,96
chrX	232903	233049	neuroPSI:1;readCounts:6	950	-	232903	233049	0	2	50,50	0,96
chrX	233203	233633	neuroPSI:1;readCounts:13	950	-	233203	233633	0	2	50,50	0,380
chrV	14146517	14146698	neuroPSI:1;readCounts:73	950	+	14146517	14146698	0	2	50,50	0,131
chrV	14146712	14146960	neuroPSI:1;readCounts:96	950	+	14146712	14146960	0	2	50,50	0,198
chrV	14146946	14147095	neuroPSI:1;readCounts:134	950	+	14146946	14147095	0	2	50,50	0,99
chrV	14147120	14147268	neuroPSI:1;readCounts:176	950	+	14147120	14147268	0	2	50,50	0,98
chrV	14147695	14147937	neuroPSI:1;readCounts:304	950	+	14147695	14147937	0	2	50,50	0,192
chrV	14148140	14148288	neuroPSI:1;readCounts:477	950	+	14148140	14148288	0	2	50,50	0,98
chrV	14137458	14137632	neuroPSI:1;readCounts:87	950	-	14137458	14137632	0	2	50,50	0,124
chrII	9512855	9513014	neuroPSI:1;readCounts:15	950	-	9512855	9513014	0	2	50,50	0,109
chrII	9513018	9513161	neuroPSI:1;readCounts:23	950	-	9513018	9513161	0	2	50,50	0,93
chrII	9513469	9513619	neuroPSI:1;readCounts:5	950	-	9513469	9513619	0	2	50,50	0,100
chrII	9548711	9548864	neuroPSI:1;readCounts:16	950	-	9548711	9548864	0	2	50,50	0,103
chrII	9548951	9549098	neuroPSI:1;readCounts:14	950	-	9548951	9549098	0	2	50,50	0,97
chrII	9545285	9545871	neuroPSI:1;readCounts:5	950	+	9545285	9545871	0	2	50,50	0,536
chrII	9545958	9546105	neuroPSI:1;readCounts:9	950	+	9545958	9546105	0	2	50,50	0,97
chrII	9532910	9533063	neuroPSI:1;readCounts:32	950	+	9532910	9533063	0	2	50,50	0,103
chrII	9533156	9533686	neuroPSI:1;readCounts:41	950	+	9533156	9533686	0	2	50,50	0,480
chrII	9517828	9517997	neuroPSI:1;readCounts:244	950	-	9517828	9517997	0	2	50,50	0,119
chrII	9518025	9518168	neuroPSI:1;readCounts:257	950	-	9518025	9518168	0	2	50,50	0,93
chrII	9518154	9518300	neuroPSI:1;readCounts:191	950	-	9518154	9518300	0	2	50,50	0,96
chrII	9518422	9518577	neuroPSI:1;readCounts:153	950	-	9518422	9518577	0	2	50,50	0,105
chrII	9518698	9518850	neuroPSI:1;readCounts:84	950	-	9518698	9518850	0	2	50,50	0,102
chrII	9519156	9519489	neuroPSI:1;readCounts:113	950	+	9519156	9519489	0	2	50,50	0,283
chrII	9519569	9519713	neuroPSI:1;readCounts:170	950	+	9519569	9519713	0	2	50,50	0,94
chrII	9519934	9520081	neuroPSI:1;readCounts:260	950	+	9519934	9520081	0	2	50,50	0,97
chrII	9520403	9520552	neuroPSI:1;readCounts:9	950	-	9520403	9520552	0	2	50,50	0,99
chrII	9524259	9524406	neuroPSI:1;readCounts:199	950	+	9524259	9524406	0	2	50,50	0,97
chrII	9524821	9524974	neuroPSI:1;readCounts:264	950	+	9524821	9524974	0	2	50,50	0,103
chrII	9524980	9525122	neuroPSI:1;readCounts:270	950	+	9524980	9525122	0	2	50,50	0,92
chrII	9525199	9525348	neuroPSI:1;readCounts:358	950	+	9525199	9525348	0	2	50,50	0,99
chrII	9525389	9525540	neuroPSI:1;readCounts:646	950	+	9525389	9525540	0	2	50,50	0,101
chrII	9525577	9525726	neuroPSI:1;readCounts:722	950	+	9525577	9525726	0	2	50,50	0,99
chrII	9539423	9539600	neuroPSI:1;readCounts:73	950	-	9539423	9539600	0	2	50,50	0,127
chrII	9539687	9539842	neuroPSI:0.203;readCounts:13	950	-	9539687	9539842	0	2	50,50	0,105
chrII	9539687	9540023	neuroPSI:0.359;readCounts:23	950	-	9539687	9540023	0	2	50,50	0,286
chrII	9539687	9540223	neuroPSI:0.438;readCounts:28	950	-	9539687	9540223	0	2	50,50	0,486
chrII	9541762	9541908	neuroPSI:1;readCounts:79	950	-	9541762	9541908	0	2	50,50	0,96
chrII	9541995	9542285	neuroPSI:1;readCounts:69	950	-	9541995	9542285	0	2	50,50	0,240
chrII	9546540	9546801	neuroPSI:1;readCounts:8	950	-	9546540	9546801	0	2	50,50	0,211
chrII	9546894	9547043	neuroPSI:1;readCounts:10	950	-	9546894	9547043	0	2	50,50	0,99
chrX	2243606	2243758	neuroPSI:1;readCounts:284	950	-	2243606	2243758	0	2	50,50	0,102
chrX	2243811	2244072	neuroPSI:0.978;readCounts:269	950	-	2243811	2244072	0	2	50,50	0,211
chrX	2243811	2244185	neuroPSI:0.022;readCounts:6	950	-	2243811	2244185	0	2	50,50	0,324
chrX	2244038	2244185	neuroPSI:0.97;readCounts:194	950	-	2244038	2244185	0	2	50,50	0,97
chrX	2244339	2244488	neuroPSI:1;readCounts:86	950	-	2244339	2244488	0	2	50,50	0,99
chrX	2244464	2244612	neuroPSI:1;readCounts:76	950	-	2244464	2244612	0	2	50,50	0,98
chrX	2244716	2245407	neuroPSI:1;readCounts:44	950	-	2244716	2245407	0	2	50,50	0,641
chrX	2245527	2245673	neuroPSI:1;readCounts:29	950	-	2245527	2245673	0	2	50,50	0,96
chrX	2245665	2246942	neuroPSI:1;readCounts:6	950	-	2245665	2246942	0	2	50,50	0,1227
chrX	2256297	2257271	neuroPSI:1;readCounts:388	950	-	2256297	2257271	0	2	50,50	0,924
chrX	2257330	2257487	neuroPSI:1;readCounts:282	950	-	2257330	2257487	0	2	50,50	0,107
chrX	2257650	2257808	neuroPSI:1;readCounts:176	950	-	2257650	2257808	0	2	50,50	0,108
chrX	2257787	2257935	neuroPSI:1;readCounts:98	950	-	2257787	2257935	0	2	50,50	0,98
chrX	2257937	2258088	neuroPSI:1;readCounts:72	950	-	2257937	2258088	0	2	50,50	0,101
chrX	2259374	2259535	neuroPSI:1;readCounts:1445	950	-	2259374	2259535	0	2	50,50	0,111
chrX	2259494	2259648	neuroPSI:1;readCounts:14	950	-	2259494	2259648	0	2	50,50	0,104
chrX	2259615	2260070	neuroPSI:1;readCounts:1523	950	-	2259615	2260070	0	2	50,50	0,405
chrX	2271344	2271703	neuroPSI:1;readCounts:315	950	-	2271344	2271703	0	2	50,50	0,309
chrX	2271775	2272379	neuroPSI:1;readCounts:257	950	-	2271775	2272379	0	2	50,50	0,554
chrX	2272537	2272690	neuroPSI:1;readCounts:154	950	-	2272537	2272690	0	2	50,50	0,103
chrX	2272705	2273001	neuroPSI:1;readCounts:51	950	-	2272705	2273001	0	2	50,50	0,246
chrX	2273140	2274025	neuroPSI:1;readCounts:50	950	-	2273140	2274025	0	2	50,50	0,835
chrX	2273980	2274232	neuroPSI:1;readCounts:58	950	-	2273980	2274232	0	2	50,50	0,202
chrX	2263474	2263802	neuroPSI:0.015;readCounts:83	950	-	2263474	2263802	0	2	50,50	0,278
chrX	2263474	2263857	neuroPSI:0.002;readCounts:11	950	-	2263474	2263857	0	2	50,50	0,333
chrX	2263474	2263928	neuroPSI:0.981;readCounts:5274	950	-	2263474	2263928	0	2	50,50	0,404
chrX	2263474	2265496	neuroPSI:0.001;readCounts:6	950	-	2263474	2265496	0	2	50,50	0,1972
chrX	2263757	2263928	neuroPSI:0.004;readCounts:20	950	-	2263757	2263928	0	2	50,50	0,121
chrX	2263934	2264080	neuroPSI:1;readCounts:5269	950	-	2263934	2264080	0	2	50,50	0,96
chrX	2264046	2264207	neuroPSI:1;readCounts:4176	950	-	2264046	2264207	0	2	50,50	0,111
chrX	2264171	2264320	neuroPSI:1;readCounts:5282	950	-	2264171	2264320	0	2	50,50	0,99
chrX	2264292	2264502	neuroPSI:0.003;readCounts:15	950	-	2264292	2264502	0	2	50,50	0,160
chrX	2264292	2265492	neuroPSI:0.007;readCounts:31	950	-	2264292	2265492	0	2	50,50	0,1150
chrX	2264292	2265496	neuroPSI:0.99;readCounts:4423	950	-	2264292	2265496	0	2	50,50	0,1154
chrX	2265536	2265689	neuroPSI:1;readCounts:1884	950	-	2265536	2265689	0	2	50,50	0,103
chrX	2265642	2265786	neuroPSI:1;readCounts:1434	950	-	2265642	2265786	0	2	50,50	0,94
chrX	2243141	2243553	neuroPSI:1;readCounts:8	950	+	2243141	2243553	0	2	50,50	0,362
chrX	2243792	2244062	neuroPSI:1;readCounts:5	950	+	2243792	2244062	0	2	50,50	0,220
chrIV	12129588	12131996	neuroPSI:0.997;readCounts:2244	950	+	12129588	12131996	0	2	50,50	0,2358
chrIV	12129754	12131996	neuroPSI:0.003;readCounts:7	950	+	12129754	12131996	0	2	50,50	0,2192
chrIV	12132009	12132863	neuroPSI:1;readCounts:2871	950	+	12132009	12132863	0	2	50,50	0,804
chrIV	12132876	12133099	neuroPSI:1;readCounts:3392	950	+	12132876	12133099	0	2	50,50	0,173
chrIV	12133222	12134681	neuroPSI:1;readCounts:4953	950	+	12133222	12134681	0	2	50,50	0,1409
chrIV	12134672	12134825	neuroPSI:1;readCounts:5577	950	+	12134672	12134825	0	2	50,50	0,103
chrIV	12146786	12146942	neuroPSI:0.985;readCounts:979	950	-	12146786	12146942	0	2	50,50	0,106
chrIV	12146786	12146951	neuroPSI:0.015;readCounts:15	950	-	12146786	12146951	0	2	50,50	0,115
chrIV	12147066	12147217	neuroPSI:1;readCounts:58	950	-	12147066	12147217	0	2	50,50	0,101
chrIV	12147204	12147585	neuroPSI:1;readCounts:457	950	-	12147204	12147585	0	2	50,50	0,331
chrIV	12147808	12147960	neuroPSI:1;readCounts:357	950	-	12147808	12147960	0	2	50,50	0,102
chrIV	12147980	12148124	neuroPSI:1;readCounts:301	950	-	12147980	12148124	0	2	50,50	0,94
chrIV	12148265	12148418	neuroPSI:1;readCounts:154	950	-	12148265	12148418	0	2	50,50	0,103
chrIV	12148419	12149054	neuroPSI:1;readCounts:163	950	-	12148419	12149054	0	2	50,50	0,585
chrIV	12149311	12149458	neuroPSI:1;readCounts:83	950	-	12149311	12149458	0	2	50,50	0,97
chrIV	12150052	12150531	neuroPSI:1;readCounts:41	950	-	12150052	12150531	0	2	50,50	0,429
chrIV	12150562	12150716	neuroPSI:1;readCounts:17	950	-	12150562	12150716	0	2	50,50	0,104
chrIV	12150788	12150961	neuroPSI:1;readCounts:11	950	-	12150788	12150961	0	2	50,50	0,123
chrIV	12143662	12143810	neuroPSI:1;readCounts:849	950	-	12143662	12143810	0	2	50,50	0,98
chrIV	12143896	12144043	neuroPSI:1;readCounts:571	950	-	12143896	12144043	0	2	50,50	0,97
chrIV	12144402	12144546	neuroPSI:1;readCounts:361	950	-	12144402	12144546	0	2	50,50	0,94
chrIV	12144789	12144935	neuroPSI:1;readCounts:265	950	-	12144789	12144935	0	2	50,50	0,96
chrIV	12145050	12145198	neuroPSI:1;readCounts:124	950	-	12145050	12145198	0	2	50,50	0,98
chrIV	12145233	12145383	neuroPSI:1;readCounts:127	950	-	12145233	12145383	0	2	50,50	0,100
chrIV	12145404	12145553	neuroPSI:0.064;readCounts:9	950	-	12145404	12145553	0	2	50,50	0,99
chrIV	12145404	12145559	neuroPSI:0.858;readCounts:121	950	-	12145404	12145559	0	2	50,50	0,105
chrIV	12145404	12145588	neuroPSI:0.078;readCounts:11	950	-	12145404	12145588	0	2	50,50	0,134
chrIV	12145602	12145747	neuroPSI:0.102;readCounts:12	950	-	12145602	12145747	0	2	50,50	0,95
chrIV	12145605	12145747	neuroPSI:0.898;readCounts:106	950	-	12145605	12145747	0	2	50,50	0,92
chrIV	12135521	12136127	neuroPSI:0.285;readCounts:835	950	-	12135521	12136127	0	2	50,50	0,556
chrIV	12135521	12136252	neuroPSI:0.715;readCounts:2094	950	-	12135521	12136252	0	2	50,50	0,681
chrIV	12135529	12136127	neuroPSI:0.022;readCounts:19	950	-	12135529	12136127	0	2	50,50	0,548
chrIV	12135529	12136252	neuroPSI:0.019;readCounts:50	950	-	12135529	12136252	0	2	50,50	0,673
chrIV	12136101	12136252	neuroPSI:0.023;readCounts:60	950	-	12136101	12136252	0	2	50,50	0,101
chrIV	12136104	12136252	neuroPSI:0.168;readCounts:444	950	-	12136104	12136252	0	2	50,50	0,98
chrIV	12136471	12136704	neuroPSI:0.996;readCounts:1666	950	-	12136471	12136704	0	2	50,50	0,183
chrIV	12136471	12136728	neuroPSI:0.004;readCounts:7	950	-	12136471	12136728	0	2	50,50	0,207
chrIV	12136804	12137227	neuroPSI:1;readCounts:1079	950	-	12136804	12137227	0	2	50,50	0,373
chrIV	12137187	12137334	neuroPSI:1;readCounts:993	950	-	12137187	12137334	0	2	50,50	0,97
chrIV	12137297	12138146	neuroPSI:1;readCounts:6	950	-	12137297	12138146	0	2	50,50	0,799
chrIV	12141427	12141579	neuroPSI:1;readCounts:1932	950	-	12141427	12141579	0	2	50,50	0,102
chrIV	12142079	12142225	neuroPSI:1;readCounts:832	950	-	12142079	12142225	0	2	50,50	0,96
chrIV	12142335	12142478	neuroPSI:1;readCounts:481	950	-	12142335	12142478	0	2	50,50	0,93
chrIV	12142505	12142648	neuroPSI:1;readCounts:263	950	-	12142505	12142648	0	2	50,50	0,93
chrIV	12142673	12142814	neuroPSI:1;readCounts:264	950	-	12142673	12142814	0	2	50,50	0,91
chrIV	12142939	12143080	neuroPSI:1;readCounts:202	950	-	12142939	12143080	0	2	50,50	0,91
chrIV	12143107	12143253	neuroPSI:1;readCounts:119	950	-	12143107	12143253	0	2	50,50	0,96
chrIV	12156930	12159519	neuroPSI:1;readCounts:199	950	+	12156930	12159519	0	2	50,50	0,2539
chrIV	12159501	12159648	neuroPSI:1;readCounts:270	950	+	12159501	12159648	0	2	50,50	0,97
chrIV	12159610	12159755	neuroPSI:1;readCounts:363	950	+	12159610	12159755	0	2	50,50	0,95
chrIV	12159824	12159980	neuroPSI:1;readCounts:571	950	+	12159824	12159980	0	2	50,50	0,106
chrIV	12160006	12160597	neuroPSI:1;readCounts:702	950	+	12160006	12160597	0	2	50,50	0,541
chrIV	12160604	12160752	neuroPSI:1;readCounts:757	950	+	12160604	12160752	0	2	50,50	0,98
chrIV	12160782	12161604	neuroPSI:1;readCounts:960	950	+	12160782	12161604	0	2	50,50	0,772
chrIV	12161586	12161736	neuroPSI:1;readCounts:970	950	+	12161586	12161736	0	2	50,50	0,100
chrIV	12161940	12162116	neuroPSI:1;readCounts:2310	950	+	12161940	12162116	0	2	50,50	0,126
chrIV	12162193	12162337	neuroPSI:0.006;readCounts:19	950	+	12162193	12162337	0	2	50,50	0,94
chrIV	12162193	12162343	neuroPSI:0.985;readCounts:3353	950	+	12162193	12162343	0	2	50,50	0,100
chrIV	12162193	12162863	neuroPSI:0.008;readCounts:31	950	+	12162193	12162863	0	2	50,50	0,620
chrIV	12162369	12162857	neuroPSI:0.022;readCounts:89	950	+	12162369	12162857	0	2	50,50	0,438
chrIV	12162369	12162863	neuroPSI:0.978;readCounts:3901	950	+	12162369	12162863	0	2	50,50	0,444
chrIV	12162823	12162971	neuroPSI:1;readCounts:3875	950	+	12162823	12162971	0	2	50,50	0,98
chrIV	12163003	12163631	neuroPSI:1;readCounts:5334	950	+	12163003	12163631	0	2	50,50	0,578
chrIV	12163901	12164049	neuroPSI:0.979;readCounts:5940	950	+	12163901	12164049	0	2	50,50	0,98
chrIV	12163901	12164054	neuroPSI:0.021;readCounts:125	950	+	12163901	12164054	0	2	50,50	0,103
chrIV	12151406	12151558	neuroPSI:1;readCounts:443	950	-	12151406	12151558	0	2	50,50	0,102
chrIV	12151597	12151752	neuroPSI:1;readCounts:359	950	-	12151597	12151752	0	2	50,50	0,105
chrIV	12151718	12151864	neuroPSI:1;readCounts:334	950	-	12151718	12151864	0	2	50,50	0,96
chrIV	12151875	12152021	neuroPSI:1;readCounts:331	950	-	12151875	12152021	0	2	50,50	0,96
chrIV	12152088	12152237	neuroPSI:1;readCounts:279	950	-	12152088	12152237	0	2	50,50	0,99
chrIV	12152219	12152371	neuroPSI:1;readCounts:240	950	-	12152219	12152371	0	2	50,50	0,102
chrIV	12152465	12152697	neuroPSI:0.579;readCounts:103	950	-	12152465	12152697	0	2	50,50	0,182
chrIV	12152477	12152697	neuroPSI:0.421;readCounts:75	950	-	12152477	12152697	0	2	50,50	0,170
chrIV	12152895	12153044	neuroPSI:1;readCounts:133	950	-	12152895	12153044	0	2	50,50	0,99
chrIV	12153280	12153439	neuroPSI:1;readCounts:94	950	-	12153280	12153439	0	2	50,50	0,109
chrIV	12153594	12153740	neuroPSI:1;readCounts:56	950	-	12153594	12153740	0	2	50,50	0,96
chrIV	12153706	12153850	neuroPSI:1;readCounts:32	950	-	12153706	12153850	0	2	50,50	0,94
chrIV	12153909	12154052	neuroPSI:1;readCounts:28	950	-	12153909	12154052	0	2	50,50	0,93
chrIV	12139097	12139256	neuroPSI:0.926;readCounts:1119	950	-	12139097	12139256	0	2	50,50	0,109
chrIV	12139103	12139256	neuroPSI:0.074;readCounts:89	950	-	12139103	12139256	0	2	50,50	0,103
chrIV	12139264	12139409	neuroPSI:1;readCounts:1666	950	-	12139264	12139409	0	2	50,50	0,95
chrIV	12139525	12139674	neuroPSI:1;readCounts:980	950	-	12139525	12139674	0	2	50,50	0,99
chrIV	12139711	12140028	neuroPSI:0.076;readCounts:56	950	-	12139711	12140028	0	2	50,50	0,267
chrIV	12139711	12140074	neuroPSI:0.924;readCounts:683	950	-	12139711	12140074	0	2	50,50	0,313
chrIV	12140422	12140570	neuroPSI:1;readCounts:331	950	-	12140422	12140570	0	2	50,50	0,98
chrIV	12140668	12140814	neuroPSI:1;readCounts:206	950	-	12140668	12140814	0	2	50,50	0,96
chrIV	12140841	12140984	neuroPSI:1;readCounts:140	950	-	12140841	12140984	0	2	50,50	0,93
chrI	12759789	12760009	neuroPSI:1;readCounts:721	950	-	12759789	12760009	0	2	50,50	0,170
chrI	12759974	12760287	neuroPSI:1;readCounts:485	950	-	12759974	12760287	0	2	50,50	0,263
chrI	12760280	12760425	neuroPSI:1;readCounts:466	950	-	12760280	12760425	0	2	50,50	0,95
chrI	12760355	12760894	neuroPSI:0.017;readCounts:7	950	-	12760355	12760894	0	2	50,50	0,489
chrI	12760455	12760894	neuroPSI:0.983;readCounts:404	950	-	12760455	12760894	0	2	50,50	0,389
chrI	12760865	12761232	neuroPSI:1;readCounts:287	950	-	12760865	12761232	0	2	50,50	0,317
chrI	12761477	12761859	neuroPSI:1;readCounts:130	950	-	12761477	12761859	0	2	50,50	0,332
chrI	12761914	12762187	neuroPSI:1;readCounts:94	950	-	12761914	12762187	0	2	50,50	0,223
chrI	12762229	12762708	neuroPSI:1;readCounts:64	950	-	12762229	12762708	0	2	50,50	0,429
chrI	12762767	12763172	neuroPSI:1;readCounts:49	950	-	12762767	12763172	0	2	50,50	0,355
chrI	12763210	12763508	neuroPSI:1;readCounts:43	950	-	12763210	12763508	0	2	50,50	0,248
chrI	12763616	12763789	neuroPSI:1;readCounts:24	950	-	12763616	12763789	0	2	50,50	0,123
chrI	12763843	12764039	neuroPSI:1;readCounts:25	950	-	12763843	12764039	0	2	50,50	0,146
chrI	12764063	12764351	neuroPSI:1;readCounts:23	950	-	12764063	12764351	0	2	50,50	0,238
chrI	12764432	12764872	neuroPSI:1;readCounts:6	950	-	12764432	12764872	0	2	50,50	0,390
chrI	12773704	12774159	neuroPSI:1;readCounts:48	950	+	12773704	12774159	0	2	50,50	0,405
chrI	12774288	12774830	neuroPSI:1;readCounts:90	950	+	12774288	12774830	0	2	50,50	0,492
chrI	12775144	12775806	neuroPSI:1;readCounts:216	950	+	12775144	12775806	0	2	50,50	0,612
chrI	12775817	12776453	neuroPSI:1;readCounts:188	950	+	12775817	12776453	0	2	50,50	0,586
chrI	12776689	12777367	neuroPSI:1;readCounts:315	950	+	12776689	12777367	0	2	50,50	0,628
chrI	12777378	12779151	neuroPSI:1;readCounts:380	950	+	12777378	12779151	0	2	50,50	0,1723
chrI	12779171	12779334	neuroPSI:1;readCounts:550	950	+	12779171	12779334	0	2	50,50	0,113
chrI	12779331	12780100	neuroPSI:0.016;readCounts:10	950	+	12779331	12780100	0	2	50,50	0,719
chrI	12779399	12780100	neuroPSI:0.984;readCounts:608	950	+	12779399	12780100	0	2	50,50	0,651
chrI	12780069	12780297	neuroPSI:1;readCounts:772	950	+	12780069	12780297	0	2	50,50	0,178
chrI	12780404	12781270	neuroPSI:0.006;readCounts:6	950	+	12780404	12781270	0	2	50,50	0,816
chrI	12780404	12781277	neuroPSI:0.984;readCounts:979	950	+	12780404	12781277	0	2	50,50	0,823
chrI	12780404	12781586	neuroPSI:0.01;readCounts:10	950	+	12780404	12781586	0	2	50,50	0,1132
chrI	12781234	12781586	neuroPSI:0.99;readCounts:975	950	+	12781234	12781586	0	2	50,50	0,302
chrI	12781757	12782154	neuroPSI:0.006;readCounts:5	950	+	12781757	12782154	0	2	50,50	0,347
chrI	12781763	12782154	neuroPSI:0.994;readCounts:816	950	+	12781763	12782154	0	2	50,50	0,341
chrI	12775765	12776441	neuroPSI:0.667;readCounts:24	950	-	12775765	12776441	0	2	50,50	0,626
chrI	12775772	12776441	neuroPSI:0.333;readCounts:12	950	-	12775772	12776441	0	2	50,50	0,619
chrV	10291946	10292115	neuroPSI:1;readCounts:172	950	-	10291946	10292115	0	2	50,50	0,119
chrV	10292520	10292745	neuroPSI:1;readCounts:430	950	-	10292520	10292745	0	2	50,50	0,175
chrV	10315850	10316004	neuroPSI:1;readCounts:899	950	-	10315850	10316004	0	2	50,50	0,104
chrV	10316006	10316262	neuroPSI:1;readCounts:747	950	-	10316006	10316262	0	2	50,50	0,206
chrV	10316489	10316641	neuroPSI:1;readCounts:341	950	-	10316489	10316641	0	2	50,50	0,102
chrV	10316885	10317033	neuroPSI:1;readCounts:170	950	-	10316885	10317033	0	2	50,50	0,98
chrV	10317884	10318028	neuroPSI:1;readCounts:1588	950	-	10317884	10318028	0	2	50,50	0,94
chrV	10318379	10318524	neuroPSI:1;readCounts:767	950	-	10318379	10318524	0	2	50,50	0,95
chrV	10318535	10318678	neuroPSI:1;readCounts:708	950	-	10318535	10318678	0	2	50,50	0,93
chrV	10318865	10319010	neuroPSI:1;readCounts:408	950	-	10318865	10319010	0	2	50,50	0,95
chrV	10319325	10319475	neuroPSI:1;readCounts:126	950	-	10319325	10319475	0	2	50,50	0,100
chrV	10320867	10321017	neuroPSI:1;readCounts:355	950	+	10320867	10321017	0	2	50,50	0,100
chrV	10321066	10321590	neuroPSI:1;readCounts:629	950	+	10321066	10321590	0	2	50,50	0,474
chrV	10321682	10321828	neuroPSI:0.967;readCounts:816	950	+	10321682	10321828	0	2	50,50	0,96
chrV	10321682	10321836	neuroPSI:0.033;readCounts:28	950	+	10321682	10321836	0	2	50,50	0,104
chrV	10321994	10322142	neuroPSI:1;readCounts:1202	950	+	10321994	10322142	0	2	50,50	0,98
chrV	10322618	10322768	neuroPSI:1;readCounts:1240	950	-	10322618	10322768	0	2	50,50	0,100
chrV	10322761	10322906	neuroPSI:1;readCounts:1424	950	-	10322761	10322906	0	2	50,50	0,95
chrV	10322928	10323075	neuroPSI:0.688;readCounts:544	950	-	10322928	10323075	0	2	50,50	0,97
chrV	10322928	10323697	neuroPSI:0.188;readCounts:149	950	-	10322928	10323697	0	2	50,50	0,719
chrV	10322928	10323745	neuroPSI:0.124;readCounts:98	950	-	10322928	10323745	0	2	50,50	0,767
chrV	10323166	10323311	neuroPSI:1;readCounts:373	950	-	10323166	10323311	0	2	50,50	0,95
chrV	10323942	10324089	neuroPSI:1;readCounts:345	950	-	10323942	10324089	0	2	50,50	0,97
chrV	10324159	10324307	neuroPSI:1;readCounts:196	950	-	10324159	10324307	0	2	50,50	0,98
chrV	10324298	10324442	neuroPSI:1;readCounts:112	950	-	10324298	10324442	0	2	50,50	0,94
chrV	10324488	10324635	neuroPSI:1;readCounts:106	950	-	10324488	10324635	0	2	50,50	0,97
chrV	10324649	10324794	neuroPSI:1;readCounts:139	950	-	10324649	10324794	0	2	50,50	0,95
chrV	10324980	10325149	neuroPSI:1;readCounts:82	950	-	10324980	10325149	0	2	50,50	0,119
chrV	10325433	10325938	neuroPSI:1;readCounts:27	950	-	10325433	10325938	0	2	50,50	0,455
chrV	10325950	10326355	neuroPSI:1;readCounts:17	950	-	10325950	10326355	0	2	50,50	0,355
chrV	10326398	10329230	neuroPSI:0.588;readCounts:10	950	-	10326398	10329230	0	2	50,50	0,2782
chrV	10326398	10331128	neuroPSI:0.412;readCounts:7	950	-	10326398	10331128	0	2	50,50	0,4680
chrV	10290052	10290535	neuroPSI:1;readCounts:42	950	+	10290052	10290535	0	2	50,50	0,433
chrV	10290631	10290786	neuroPSI:1;readCounts:75	950	+	10290631	10290786	0	2	50,50	0,105
chrV	10290792	10290936	neuroPSI:1;readCounts:76	950	+	10290792	10290936	0	2	50,50	0,94
chrV	10291148	10291312	neuroPSI:0.026;readCounts:5	950	+	10291148	10291312	0	2	50,50	0,114
chrV	10291171	10291312	neuroPSI:0.974;readCounts:191	950	+	10291171	10291312	0	2	50,50	0,91
chrV	10291345	10291524	neuroPSI:1;readCounts:263	950	+	10291345	10291524	0	2	50,50	0,129
chrV	10294360	10294539	neuroPSI:1;readCounts:147	950	-	10294360	10294539	0	2	50,50	0,129
chrV	10287731	10288195	neuroPSI:0.985;readCounts:452	950	+	10287731	10288195	0	2	50,50	0,414
chrV	10287731	10288405	neuroPSI:0.015;readCounts:7	950	+	10287731	10288405	0	2	50,50	0,624
chrV	10288242	10288405	neuroPSI:0.985;readCounts:475	950	+	10288242	10288405	0	2	50,50	0,113
chrV	10288423	10288883	neuroPSI:1;readCounts:513	950	+	10288423	10288883	0	2	50,50	0,410
chrV	10288896	10289043	neuroPSI:0.98;readCounts:533	950	+	10288896	10289043	0	2	50,50	0,97
chrV	10288896	10289133	neuroPSI:0.02;readCounts:11	950	+	10288896	10289133	0	2	50,50	0,187
chrV	10297742	10297885	neuroPSI:1;readCounts:119	950	+	10297742	10297885	0	2	50,50	0,93
chrV	10298041	10298222	neuroPSI:1;readCounts:273	950	+	10298041	10298222	0	2	50,50	0,131
chrV	10298217	10298362	neuroPSI:1;readCounts:407	950	+	10298217	10298362	0	2	50,50	0,95
chrV	10298571	10298736	neuroPSI:1;readCounts:821	950	+	10298571	10298736	0	2	50,50	0,115
chrV	10308324	10308474	neuroPSI:1;readCounts:189	950	-	10308324	10308474	0	2	50,50	0,100
chrV	10308466	10308620	neuroPSI:1;readCounts:194	950	-	10308466	10308620	0	2	50,50	0,104
chrV	10308619	10310103	neuroPSI:1;readCounts:137	950	-	10308619	10310103	0	2	50,50	0,1434
chrV	10310607	10310749	neuroPSI:1;readCounts:33	950	-	10310607	10310749	0	2	50,50	0,92
chrV	10310738	10310882	neuroPSI:1;readCounts:36	950	-	10310738	10310882	0	2	50,50	0,94
chrV	10310932	10311112	neuroPSI:1;readCounts:18	950	-	10310932	10311112	0	2	50,50	0,130
chrV	10311666	10311813	neuroPSI:1;readCounts:8	950	-	10311666	10311813	0	2	50,50	0,97
chrV	10299596	10299746	neuroPSI:1;readCounts:2051	950	-	10299596	10299746	0	2	50,50	0,100
chrV	10299792	10299938	neuroPSI:1;readCounts:1959	950	-	10299792	10299938	0	2	50,50	0,96
chrV	10300062	10300210	neuroPSI:1;readCounts:1293	950	-	10300062	10300210	0	2	50,50	0,98
chrV	10300433	10300618	neuroPSI:1;readCounts:853	950	-	10300433	10300618	0	2	50,50	0,135
chrV	10300608	10300754	neuroPSI:1;readCounts:655	950	-	10300608	10300754	0	2	50,50	0,96
chrV	10300847	10301027	neuroPSI:1;readCounts:412	950	-	10300847	10301027	0	2	50,50	0,130
chrV	10301067	10301208	neuroPSI:1;readCounts:297	950	-	10301067	10301208	0	2	50,50	0,91
chrV	10301231	10301377	neuroPSI:1;readCounts:240	950	-	10301231	10301377	0	2	50,50	0,96
chrV	10301460	10301603	neuroPSI:1;readCounts:192	950	-	10301460	10301603	0	2	50,50	0,93
chrV	10301587	10301751	neuroPSI:1;readCounts:233	950	-	10301587	10301751	0	2	50,50	0,114
chrV	10301746	10302275	neuroPSI:0.171;readCounts:27	950	-	10301746	10302275	0	2	50,50	0,479
chrV	10301746	10302768	neuroPSI:0.829;readCounts:131	950	-	10301746	10302768	0	2	50,50	0,972
chrV	10302786	10302928	neuroPSI:1;readCounts:101	950	-	10302786	10302928	0	2	50,50	0,92
chrV	10302974	10303516	neuroPSI:0.167;readCounts:19	950	-	10302974	10303516	0	2	50,50	0,492
chrV	10302974	10304594	neuroPSI:0.833;readCounts:95	950	-	10302974	10304594	0	2	50,50	0,1570
chrV	10304933	10305080	neuroPSI:1;readCounts:65	950	-	10304933	10305080	0	2	50,50	0,97
chrV	10305107	10305291	neuroPSI:1;readCounts:52	950	-	10305107	10305291	0	2	50,50	0,134
chrV	10305379	10305608	neuroPSI:1;readCounts:31	950	-	10305379	10305608	0	2	50,50	0,179
chrV	10305673	10305822	neuroPSI:1;readCounts:19	950	-	10305673	10305822	0	2	50,50	0,99
chrV	10306090	10306305	neuroPSI:1;readCounts:8	950	-	10306090	10306305	0	2	50,50	0,165
chrV	10306308	10306457	neuroPSI:1;readCounts:9	950	-	10306308	10306457	0	2	50,50	0,99
chrV	10306438	10306590	neuroPSI:1;readCounts:16	950	-	10306438	10306590	0	2	50,50	0,102
chrV	10306631	10306884	neuroPSI:1;readCounts:14	950	-	10306631	10306884	0	2	50,50	0,203
chrV	10306955	10307287	neuroPSI:1;readCounts:6	950	-	10306955	10307287	0	2	50,50	0,282
chrV	10314773	10314920	neuroPSI:0.997;readCounts:2581	950	+	10314773	10314920	0	2	50,50	0,97
chrV	10314773	10315065	neuroPSI:0.002;readCounts:7	950	+	10314773	10315065	0	2	50,50	0,242
chrV	10314910	10315065	neuroPSI:0.998;readCounts:3536	950	+	10314910	10315065	0	2	50,50	0,105
chrI	6028599	6029208	neuroPSI:1;readCounts:14	950	+	6028599	6029208	0	2	50,50	0,559
chrI	6030605	6031108	neuroPSI:1;readCounts:297	950	+	6030605	6031108	0	2	50,50	0,453
chrI	6031594	6032236	neuroPSI:1;readCounts:669	950	+	6031594	6032236	0	2	50,50	0,592
chrI	6032658	6033276	neuroPSI:1;readCounts:2307	950	+	6032658	6033276	0	2	50,50	0,568
chrI	6022674	6023034	neuroPSI:1;readCounts:445	950	+	6022674	6023034	0	2	50,50	0,310
chrI	6023190	6023654	neuroPSI:1;readCounts:510	950	+	6023190	6023654	0	2	50,50	0,414
chrI	6023971	6025266	neuroPSI:1;readCounts:1387	950	+	6023971	6025266	0	2	50,50	0,1245
chrI	6025452	6025848	neuroPSI:1;readCounts:2326	950	+	6025452	6025848	0	2	50,50	0,346
chrI	6026049	6026620	neuroPSI:1;readCounts:4269	950	+	6026049	6026620	0	2	50,50	0,521
chrI	6027542	6028234	neuroPSI:1;readCounts:2276	950	+	6027542	6028234	0	2	50,50	0,642
chrI	6024217	6024383	neuroPSI:1;readCounts:1234	950	-	6024217	6024383	0	2	50,50	0,116
chrI	6024369	6024885	neuroPSI:1;readCounts:1810	950	-	6024369	6024885	0	2	50,50	0,466
chrII	5970103	5971014	neuroPSI:1;readCounts:90	950	+	5970103	5971014	0	2	50,50	0,861
chrII	5971019	5971646	neuroPSI:0.212;readCounts:29	950	+	5971019	5971646	0	2	50,50	0,577
chrII	5971070	5971646	neuroPSI:0.788;readCounts:108	950	+	5971070	5971646	0	2	50,50	0,526
chrII	5971726	5972025	neuroPSI:1;readCounts:146	950	+	5971726	5972025	0	2	50,50	0,249
chrII	5972051	5972253	neuroPSI:1;readCounts:215	950	+	5972051	5972253	0	2	50,50	0,152
chrII	5945964	5946529	neuroPSI:1;readCounts:64464	950	-	5945964	5946529	0	2	50,50	0,515
chrII	5945964	5947010	neuroPSI:0;readCounts:15	950	-	5945964	5947010	0	2	50,50	0,996
chrII	5945964	5951470	neuroPSI:0;readCounts:5	950	-	5945964	5951470	0	2	50,50	0,5456
chrII	5946003	5946529	neuroPSI:0;readCounts:7	950	-	5946003	5946529	0	2	50,50	0,476
chrII	5946563	5946938	neuroPSI:1;readCounts:41891	950	-	5946563	5946938	0	2	50,50	0,325
chrII	5946563	5947283	neuroPSI:0;readCounts:16	950	-	5946563	5947283	0	2	50,50	0,670
chrII	5946957	5947283	neuroPSI:0.998;readCounts:16438	950	-	5946957	5947283	0	2	50,50	0,276
chrII	5946957	5951470	neuroPSI:0.002;readCounts:25	950	-	5946957	5951470	0	2	50,50	0,4463
chrII	5947265	5947518	neuroPSI:0.031;readCounts:357	950	-	5947265	5947518	0	2	50,50	0,203
chrII	5947265	5948672	neuroPSI:0.132;readCounts:1499	950	-	5947265	5948672	0	2	50,50	0,1357
chrII	5947265	5950843	neuroPSI:0.004;readCounts:50	950	-	5947265	5950843	0	2	50,50	0,3528
chrII	5947265	5951470	neuroPSI:0.833;readCounts:9487	950	-	5947265	5951470	0	2	50,50	0,4155
chrII	5950968	5951470	neuroPSI:0.003;readCounts:29	950	-	5950968	5951470	0	2	50,50	0,452
chrII	5951547	5953297	neuroPSI:1;readCounts:5874	950	-	5951547	5953297	0	2	50,50	0,1700
chrII	5953359	5953515	neuroPSI:1;readCounts:3729	950	-	5953359	5953515	0	2	50,50	0,106
chrII	5953564	5953714	neuroPSI:1;readCounts:2570	950	-	5953564	5953714	0	2	50,50	0,100
chrII	5954409	5954554	neuroPSI:1;readCounts:574	950	-	5954409	5954554	0	2	50,50	0,95
chrII	5955346	5955670	neuroPSI:1;readCounts:139	950	-	5955346	5955670	0	2	50,50	0,274
chrII	5955674	5956460	neuroPSI:1;readCounts:114	950	-	5955674	5956460	0	2	50,50	0,736
chrII	5956465	5956618	neuroPSI:1;readCounts:61	950	-	5956465	5956618	0	2	50,50	0,103
chrII	5968129	5968276	neuroPSI:1;readCounts:96	950	-	5968129	5968276	0	2	50,50	0,97
chrII	5968445	5968590	neuroPSI:1;readCounts:125	950	-	5968445	5968590	0	2	50,50	0,95
chrII	5968660	5968807	neuroPSI:1;readCounts:69	950	-	5968660	5968807	0	2	50,50	0,97
chrII	5968775	5968919	neuroPSI:1;readCounts:50	950	-	5968775	5968919	0	2	50,50	0,94
chrII	5968919	5969068	neuroPSI:1;readCounts:19	950	-	5968919	5969068	0	2	50,50	0,99
chrII	5972916	5973171	neuroPSI:1;readCounts:684	950	-	5972916	5973171	0	2	50,50	0,205
chrII	5973156	5973299	neuroPSI:1;readCounts:665	950	-	5973156	5973299	0	2	50,50	0,93
chrII	5973321	5973475	neuroPSI:1;readCounts:468	950	-	5973321	5973475	0	2	50,50	0,104
chrII	5973680	5974424	neuroPSI:1;readCounts:359	950	-	5973680	5974424	0	2	50,50	0,694
chrII	5974422	5974570	neuroPSI:1;readCounts:283	950	-	5974422	5974570	0	2	50,50	0,98
chrII	5974640	5974812	neuroPSI:1;readCounts:190	950	-	5974640	5974812	0	2	50,50	0,122
chrII	5974804	5974961	neuroPSI:0.882;readCounts:150	950	-	5974804	5974961	0	2	50,50	0,107
chrII	5974816	5974961	neuroPSI:0.118;readCounts:20	950	-	5974816	5974961	0	2	50,50	0,95
chrII	5961735	5961882	neuroPSI:1;readCounts:81	950	+	5961735	5961882	0	2	50,50	0,97
chrIV	11310990	11311142	neuroPSI:1;readCounts:1414	950	+	11310990	11311142	0	2	50,50	0,102
chrIV	11311169	11311326	neuroPSI:0.985;readCounts:2364	950	+	11311169	11311326	0	2	50,50	0,107
chrIV	11311169	11311373	neuroPSI:0.015;readCounts:35	950	+	11311169	11311373	0	2	50,50	0,154
chrIV	11311447	11311860	neuroPSI:1;readCounts:7	950	+	11311447	11311860	0	2	50,50	0,363
chrIV	11311452	11311601	neuroPSI:1;readCounts:2558	950	+	11311452	11311601	0	2	50,50	0,99
chrIV	11311816	11311968	neuroPSI:0.994;readCounts:3355	950	+	11311816	11311968	0	2	50,50	0,102
chrIV	11311816	11311992	neuroPSI:0.006;readCounts:19	950	+	11311816	11311992	0	2	50,50	0,126
chrIV	11312008	11312209	neuroPSI:1;readCounts:3648	950	+	11312008	11312209	0	2	50,50	0,151
chrIV	11327855	11328025	neuroPSI:1;readCounts:4784	950	-	11327855	11328025	0	2	50,50	0,120
chrIV	11328256	11328408	neuroPSI:1;readCounts:1960	950	-	11328256	11328408	0	2	50,50	0,102
chrIV	11328408	11328556	neuroPSI:1;readCounts:1364	950	-	11328408	11328556	0	2	50,50	0,98
chrIV	11328551	11328698	neuroPSI:1;readCounts:1197	950	-	11328551	11328698	0	2	50,50	0,97
chrIV	11328772	11328919	neuroPSI:1;readCounts:975	950	-	11328772	11328919	0	2	50,50	0,97
chrIV	11329216	11329363	neuroPSI:1;readCounts:414	950	-	11329216	11329363	0	2	50,50	0,97
chrIV	11329829	11329981	neuroPSI:1;readCounts:2297	950	-	11329829	11329981	0	2	50,50	0,102
chrIV	11329959	11330114	neuroPSI:1;readCounts:8	950	-	11329959	11330114	0	2	50,50	0,105
chrIV	11330176	11330325	neuroPSI:1;readCounts:1544	950	-	11330176	11330325	0	2	50,50	0,99
chrIV	11330339	11330496	neuroPSI:1;readCounts:1176	950	-	11330339	11330496	0	2	50,50	0,107
chrIV	11330734	11330881	neuroPSI:1;readCounts:860	950	-	11330734	11330881	0	2	50,50	0,97
chrIV	11331383	11331542	neuroPSI:1;readCounts:187	950	-	11331383	11331542	0	2	50,50	0,109
chrIV	11331591	11331839	neuroPSI:1;readCounts:150	950	-	11331591	11331839	0	2	50,50	0,198
chrIV	11332137	11332281	neuroPSI:1;readCounts:88	950	-	11332137	11332281	0	2	50,50	0,94
chrIV	11332278	11332419	neuroPSI:1;readCounts:74	950	-	11332278	11332419	0	2	50,50	0,91
chrIV	11332488	11332638	neuroPSI:1;readCounts:48	950	-	11332488	11332638	0	2	50,50	0,100
chrIV	11332687	11332837	neuroPSI:1;readCounts:33	950	-	11332687	11332837	0	2	50,50	0,100
chrIV	11304948	11305097	neuroPSI:1;readCounts:1529	950	-	11304948	11305097	0	2	50,50	0,99
chrIV	11305430	11305950	neuroPSI:1;readCounts:743	950	-	11305430	11305950	0	2	50,50	0,470
chrIV	11305954	11306479	neuroPSI:1;readCounts:452	950	-	11305954	11306479	0	2	50,50	0,475
chrIV	11306492	11306677	neuroPSI:1;readCounts:350	950	-	11306492	11306677	0	2	50,50	0,135
chrIV	11299058	11299208	neuroPSI:1;readCounts:334	950	+	11299058	11299208	0	2	50,50	0,100
chrIV	11299181	11300005	neuroPSI:1;readCounts:389	950	+	11299181	11300005	0	2	50,50	0,774
chrIV	11300304	11300939	neuroPSI:1;readCounts:787	950	+	11300304	11300939	0	2	50,50	0,585
chrIV	11300998	11301251	neuroPSI:1;readCounts:1053	950	+	11300998	11301251	0	2	50,50	0,203
chrIV	11301383	11303886	neuroPSI:0.991;readCounts:1753	950	+	11301383	11303886	0	2	50,50	0,2453
chrIV	11301383	11304270	neuroPSI:0.008;readCounts:16	950	+	11301383	11304270	0	2	50,50	0,2837
chrIV	11303950	11304270	neuroPSI:0.992;readCounts:1991	950	+	11303950	11304270	0	2	50,50	0,270
chrIV	11297197	11297355	neuroPSI:1;readCounts:1702	950	-	11297197	11297355	0	2	50,50	0,108
chrIV	11297318	11297477	neuroPSI:1;readCounts:1449	950	-	11297318	11297477	0	2	50,50	0,109
chrIV	11297461	11297603	neuroPSI:1;readCounts:1121	950	-	11297461	11297603	0	2	50,50	0,92
chrIV	11297618	11297762	neuroPSI:1;readCounts:961	950	-	11297618	11297762	0	2	50,50	0,94
chrIV	11297839	11297988	neuroPSI:1;readCounts:630	950	-	11297839	11297988	0	2	50,50	0,99
chrIV	11298040	11298196	neuroPSI:1;readCounts:719	950	-	11298040	11298196	0	2	50,50	0,106
chrIV	11295173	11295379	neuroPSI:1;readCounts:188	950	-	11295173	11295379	0	2	50,50	0,156
chrIV	11295498	11295643	neuroPSI:1;readCounts:177	950	-	11295498	11295643	0	2	50,50	0,95
chrIV	11295777	11295927	neuroPSI:1;readCounts:104	950	-	11295777	11295927	0	2	50,50	0,100
chrIV	11296000	11296146	neuroPSI:1;readCounts:106	950	-	11296000	11296146	0	2	50,50	0,96
chrIV	11296231	11296374	neuroPSI:1;readCounts:46	950	-	11296231	11296374	0	2	50,50	0,93
chrIV	11296417	11296832	neuroPSI:1;readCounts:45	950	-	11296417	11296832	0	2	50,50	0,365
chrIV	11320418	11320569	neuroPSI:1;readCounts:1336	950	+	11320418	11320569	0	2	50,50	0,101
chrIV	11312849	11312995	neuroPSI:1;readCounts:1300	950	-	11312849	11312995	0	2	50,50	0,96
chrIV	11313094	11313243	neuroPSI:1;readCounts:677	950	-	11313094	11313243	0	2	50,50	0,99
chrIV	11313241	11313384	neuroPSI:0.014;readCounts:7	950	-	11313241	11313384	0	2	50,50	0,93
chrIV	11313241	11313388	neuroPSI:0.986;readCounts:506	950	-	11313241	11313388	0	2	50,50	0,97
chrIV	11313248	11313388	neuroPSI:0.01;readCounts:5	950	-	11313248	11313388	0	2	50,50	0,90
chrIV	11313487	11313631	neuroPSI:1;readCounts:343	950	-	11313487	11313631	0	2	50,50	0,94
chrIV	11313745	11313908	neuroPSI:1;readCounts:197	950	-	11313745	11313908	0	2	50,50	0,113
chrIV	11327409	11327555	neuroPSI:1;readCounts:89	950	+	11327409	11327555	0	2	50,50	0,96
chrIV	11314368	11314515	neuroPSI:1;readCounts:1865	950	-	11314368	11314515	0	2	50,50	0,97
chrIV	11314537	11314684	neuroPSI:1;readCounts:1561	950	-	11314537	11314684	0	2	50,50	0,97
chrIV	11314819	11314971	neuroPSI:0.092;readCounts:73	950	-	11314819	11314971	0	2	50,50	0,102
chrIV	11314824	11314971	neuroPSI:0.908;readCounts:720	950	-	11314824	11314971	0	2	50,50	0,97
chrIV	11315244	11315394	neuroPSI:1;readCounts:10777	950	+	11315244	11315394	0	2	50,50	0,100
chrIV	11315244	11315407	neuroPSI:0;readCounts:5	950	+	11315244	11315407	0	2	50,50	0,113
chrIV	11315426	11315599	neuroPSI:1;readCounts:11438	950	+	11315426	11315599	0	2	50,50	0,123
chrIV	11317496	11317649	neuroPSI:1;readCounts:121	950	+	11317496	11317649	0	2	50,50	0,103
chrIV	11317756	11318272	neuroPSI:1;readCounts:286	950	+	11317756	11318272	0	2	50,50	0,466
chrIV	11318248	11318392	neuroPSI:1;readCounts:378	950	+	11318248	11318392	0	2	50,50	0,94
chrIV	11318545	11318703	neuroPSI:1;readCounts:567	950	+	11318545	11318703	0	2	50,50	0,108
chrIV	11318905	11319066	neuroPSI:1;readCounts:1403	950	+	11318905	11319066	0	2	50,50	0,111
chrIV	11319104	11319256	neuroPSI:1;readCounts:1779	950	+	11319104	11319256	0	2	50,50	0,102
chrIV	11319358	11319509	neuroPSI:1;readCounts:2398	950	+	11319358	11319509	0	2	50,50	0,101
chrIV	11319586	11319739	neuroPSI:1;readCounts:3613	950	+	11319586	11319739	0	2	50,50	0,103
chrIV	11320839	11320989	neuroPSI:1;readCounts:62	950	+	11320839	11320989	0	2	50,50	0,100
chrIV	11321002	11321151	neuroPSI:1;readCounts:62	950	+	11321002	11321151	0	2	50,50	0,99
chrIV	11321322	11321466	neuroPSI:1;readCounts:100	950	+	11321322	11321466	0	2	50,50	0,94
chrIV	11322339	11322514	neuroPSI:1;readCounts:5	950	+	11322339	11322514	0	2	50,50	0,125
chrIV	11322632	11322838	neuroPSI:1;readCounts:761	950	+	11322632	11322838	0	2	50,50	0,156
chrIV	11322922	11323081	neuroPSI:1;readCounts:916	950	+	11322922	11323081	0	2	50,50	0,109
chrIV	11323203	11323346	neuroPSI:1;readCounts:1311	950	+	11323203	11323346	0	2	50,50	0,93
chrI	4664534	4664678	neuroPSI:1;readCounts:84	950	+	4664534	4664678	0	2	50,50	0,94
chrI	4664732	4664884	neuroPSI:1;readCounts:70	950	+	4664732	4664884	0	2	50,50	0,102
chrI	4664958	4665102	neuroPSI:1;readCounts:104	950	+	4664958	4665102	0	2	50,50	0,94
chrI	4665103	4665248	neuroPSI:1;readCounts:72	950	+	4665103	4665248	0	2	50,50	0,95
chrI	4661104	4661255	neuroPSI:1;readCounts:299	950	-	4661104	4661255	0	2	50,50	0,101
chrI	4661332	4661812	neuroPSI:0.984;readCounts:309	950	-	4661332	4661812	0	2	50,50	0,430
chrI	4661346	4661812	neuroPSI:0.016;readCounts:5	950	-	4661346	4661812	0	2	50,50	0,416
chrI	4661906	4662052	neuroPSI:1;readCounts:239	950	-	4661906	4662052	0	2	50,50	0,96
chrI	4662029	4662180	neuroPSI:1;readCounts:281	950	-	4662029	4662180	0	2	50,50	0,101
chrI	4653492	4653647	neuroPSI:1;readCounts:15	950	+	4653492	4653647	0	2	50,50	0,105
chrI	4653636	4655398	neuroPSI:1;readCounts:7	950	+	4653636	4655398	0	2	50,50	0,1712
chrI	4655446	4655770	neuroPSI:1;readCounts:263	950	+	4655446	4655770	0	2	50,50	0,274
chrI	4656408	4656560	neuroPSI:1;readCounts:650	950	+	4656408	4656560	0	2	50,50	0,102
chrI	4656730	4657255	neuroPSI:0.051;readCounts:32	950	+	4656730	4657255	0	2	50,50	0,475
chrI	4656730	4657261	neuroPSI:0.949;readCounts:591	950	+	4656730	4657261	0	2	50,50	0,481
chrI	4657377	4657988	neuroPSI:0.032;readCounts:42	950	+	4657377	4657988	0	2	50,50	0,561
chrI	4657383	4657988	neuroPSI:0.005;readCounts:6	950	+	4657383	4657988	0	2	50,50	0,555
chrI	4657437	4657988	neuroPSI:0.964;readCounts:1277	950	+	4657437	4657988	0	2	50,50	0,501
chrI	4658205	4658734	neuroPSI:1;readCounts:1288	950	+	4658205	4658734	0	2	50,50	0,479
chrI	4658712	4659058	neuroPSI:1;readCounts:1836	950	+	4658712	4659058	0	2	50,50	0,296
chrI	4644713	4645234	neuroPSI:1;readCounts:1193	950	+	4644713	4645234	0	2	50,50	0,471
chrI	4645254	4645402	neuroPSI:1;readCounts:1283	950	+	4645254	4645402	0	2	50,50	0,98
chrI	4645785	4645924	neuroPSI:1;readCounts:100	950	-	4645785	4645924	0	2	50,50	0,89
chrI	4645866	4646158	neuroPSI:1;readCounts:315	950	-	4645866	4646158	0	2	50,50	0,242
chrI	4645950	4646149	neuroPSI:1;readCounts:5	950	-	4645950	4646149	0	2	50,50	0,149
chrI	4645997	4646203	neuroPSI:1;readCounts:16	950	-	4645997	4646203	0	2	50,50	0,156
chrI	4646148	4646405	neuroPSI:1;readCounts:1315	950	-	4646148	4646405	0	2	50,50	0,207
chrI	4646164	4646681	neuroPSI:1;readCounts:398	950	-	4646164	4646681	0	2	50,50	0,467
chrI	4646181	4646330	neuroPSI:1;readCounts:122344	950	-	4646181	4646330	0	2	50,50	0,99
chrI	4646338	4646486	neuroPSI:0.001;readCounts:118	950	-	4646338	4646486	0	2	50,50	0,98
chrI	4646338	4646490	neuroPSI:0.999;readCounts:120185	950	-	4646338	4646490	0	2	50,50	0,102
chrI	4646653	4646835	neuroPSI:1;readCounts:76175	950	-	4646653	4646835	0	2	50,50	0,132
chrI	4648565	4648714	neuroPSI:1;readCounts:7	950	-	4648565	4648714	0	2	50,50	0,99
chrI	4648691	4648847	neuroPSI:1;readCounts:1943	950	-	4648691	4648847	0	2	50,50	0,106
chrI	4649051	4649228	neuroPSI:0.96;readCounts:1085	950	-	4649051	4649228	0	2	50,50	0,127
chrI	4649051	4649660	neuroPSI:0.04;readCounts:45	950	-	4649051	4649660	0	2	50,50	0,559
chrI	4649275	4649660	neuroPSI:0.959;readCounts:1059	950	-	4649275	4649660	0	2	50,50	0,335
chrI	4649692	4650298	neuroPSI:1;readCounts:887	950	-	4649692	4650298	0	2	50,50	0,556
chrI	4650492	4650641	neuroPSI:1;readCounts:344	950	-	4650492	4650641	0	2	50,50	0,99
chrI	4652273	4652619	neuroPSI:1;readCounts:916	950	-	4652273	4652619	0	2	50,50	0,296
chrI	4652651	4652803	neuroPSI:1;readCounts:559	950	-	4652651	4652803	0	2	50,50	0,102
chrI	4666245	4666450	neuroPSI:1;readCounts:1954	950	-	4666245	4666450	0	2	50,50	0,155
chrI	4667149	4667767	neuroPSI:1;readCounts:892	950	-	4667149	4667767	0	2	50,50	0,568
chrI	4667901	4668061	neuroPSI:1;readCounts:697	950	-	4667901	4668061	0	2	50,50	0,110
chrI	4668659	4669276	neuroPSI:1;readCounts:160	950	-	4668659	4669276	0	2	50,50	0,567
chrI	4669352	4669510	neuroPSI:1;readCounts:122	950	-	4669352	4669510	0	2	50,50	0,108
chrI	4669689	4669841	neuroPSI:1;readCounts:74	950	-	4669689	4669841	0	2	50,50	0,102
chrI	4670742	4670907	neuroPSI:1;readCounts:313	950	-	4670742	4670907	0	2	50,50	0,115
chrI	4671374	4671528	neuroPSI:1;readCounts:196	950	-	4671374	4671528	0	2	50,50	0,104
chrI	4671569	4671729	neuroPSI:1;readCounts:142	950	-	4671569	4671729	0	2	50,50	0,110
chrI	4647515	4647662	neuroPSI:1;readCounts:1062	950	+	4647515	4647662	0	2	50,50	0,97
chrI	4647831	4647980	neuroPSI:1;readCounts:1877	950	+	4647831	4647980	0	2	50,50	0,99
chrII	2040560	2040708	neuroPSI:1;readCounts:117	950	-	2040560	2040708	0	2	50,50	0,98
chrII	2040760	2040911	neuroPSI:1;readCounts:165	950	-	2040760	2040911	0	2	50,50	0,101
chrII	2040947	2041101	neuroPSI:1;readCounts:91	950	-	2040947	2041101	0	2	50,50	0,104
chrII	2041398	2041552	neuroPSI:1;readCounts:97	950	-	2041398	2041552	0	2	50,50	0,104
chrII	2043313	2043459	neuroPSI:1;readCounts:207	950	-	2043313	2043459	0	2	50,50	0,96
chrII	2043511	2043662	neuroPSI:1;readCounts:127	950	-	2043511	2043662	0	2	50,50	0,101
chrII	2043896	2044048	neuroPSI:1;readCounts:63	950	-	2043896	2044048	0	2	50,50	0,102
chrII	2044807	2044956	neuroPSI:1;readCounts:378	950	-	2044807	2044956	0	2	50,50	0,99
chrII	2045008	2045160	neuroPSI:1;readCounts:342	950	-	2045008	2045160	0	2	50,50	0,102
chrII	2045208	2045362	neuroPSI:1;readCounts:249	950	-	2045208	2045362	0	2	50,50	0,104
chrII	2046411	2046554	neuroPSI:1;readCounts:44	950	-	2046411	2046554	0	2	50,50	0,93
chrII	2048133	2048284	neuroPSI:1;readCounts:39	950	-	2048133	2048284	0	2	50,50	0,101
chrII	2048336	2048489	neuroPSI:1;readCounts:63	950	-	2048336	2048489	0	2	50,50	0,103
chrII	2048537	2048684	neuroPSI:1;readCounts:55	950	-	2048537	2048684	0	2	50,50	0,97
chrII	2048969	2049116	neuroPSI:1;readCounts:28	950	-	2048969	2049116	0	2	50,50	0,97
chrX	12032291	12032480	neuroPSI:1;readCounts:480	950	-	12032291	12032480	0	2	50,50	0,139
chrX	12032485	12033065	neuroPSI:1;readCounts:350	950	-	12032485	12033065	0	2	50,50	0,530
chrX	12033217	12033363	neuroPSI:1;readCounts:177	950	-	12033217	12033363	0	2	50,50	0,96
chrX	12033449	12033965	neuroPSI:1;readCounts:80	950	-	12033449	12033965	0	2	50,50	0,466
chrX	12028936	12029133	neuroPSI:1;readCounts:311	950	+	12028936	12029133	0	2	50,50	0,147
chrX	12029121	12029897	neuroPSI:1;readCounts:369	950	+	12029121	12029897	0	2	50,50	0,726
chrX	12029923	12030077	neuroPSI:1;readCounts:701	950	+	12029923	12030077	0	2	50,50	0,104
chrX	12030319	12031043	neuroPSI:1;readCounts:1270	950	+	12030319	12031043	0	2	50,50	0,674
chrX	12031138	12031412	neuroPSI:0.996;readCounts:1278	950	+	12031138	12031412	0	2	50,50	0,224
chrX	12031218	12031412	neuroPSI:0.004;readCounts:5	950	+	12031218	12031412	0	2	50,50	0,144
chrX	12043083	12043237	neuroPSI:1;readCounts:594	950	-	12043083	12043237	0	2	50,50	0,104
chrX	12043882	12044034	neuroPSI:1;readCounts:97	950	-	12043882	12044034	0	2	50,50	0,102
chrX	12044157	12044331	neuroPSI:1;readCounts:113	950	-	12044157	12044331	0	2	50,50	0,124
chrX	12044441	12044596	neuroPSI:1;readCounts:45	950	-	12044441	12044596	0	2	50,50	0,105
chrX	12044556	12044737	neuroPSI:1;readCounts:42	950	-	12044556	12044737	0	2	50,50	0,131
chrX	12044940	12045089	neuroPSI:1;readCounts:31	950	-	12044940	12045089	0	2	50,50	0,99
chrX	12045225	12045374	neuroPSI:1;readCounts:28	950	-	12045225	12045374	0	2	50,50	0,99
chrX	12045358	12045695	neuroPSI:1;readCounts:24	950	-	12045358	12045695	0	2	50,50	0,287
chrX	12045758	12046230	neuroPSI:1;readCounts:23	950	-	12045758	12046230	0	2	50,50	0,422
chrX	12046451	12047412	neuroPSI:1;readCounts:12	950	-	12046451	12047412	0	2	50,50	0,911
chrX	12047539	12048690	neuroPSI:1;readCounts:10	950	-	12047539	12048690	0	2	50,50	0,1101
chrX	12048690	12048917	neuroPSI:1;readCounts:6	950	-	12048690	12048917	0	2	50,50	0,177
chrI	10713789	10713940	neuroPSI:1;readCounts:970	950	-	10713789	10713940	0	2	50,50	0,101
chrI	10714053	10714201	neuroPSI:1;readCounts:948	950	-	10714053	10714201	0	2	50,50	0,98
chrI	10714642	10714792	neuroPSI:1;readCounts:404	950	-	10714642	10714792	0	2	50,50	0,100
chrI	10714806	10715038	neuroPSI:1;readCounts:288	950	-	10714806	10715038	0	2	50,50	0,182
chrI	10715181	10715451	neuroPSI:1;readCounts:251	950	-	10715181	10715451	0	2	50,50	0,220
chrI	10715465	10715610	neuroPSI:1;readCounts:199	950	-	10715465	10715610	0	2	50,50	0,95
chrI	10715741	10716289	neuroPSI:1;readCounts:98	950	-	10715741	10716289	0	2	50,50	0,498
chrI	10716303	10716448	neuroPSI:1;readCounts:91	950	-	10716303	10716448	0	2	50,50	0,95
chrI	10716579	10716725	neuroPSI:1;readCounts:71	950	-	10716579	10716725	0	2	50,50	0,96
chrI	10716739	10716891	neuroPSI:1;readCounts:58	950	-	10716739	10716891	0	2	50,50	0,102
chrI	10716945	10717764	neuroPSI:1;readCounts:19	950	-	10716945	10717764	0	2	50,50	0,769
chrI	10717692	10717849	neuroPSI:1;readCounts:60	950	-	10717692	10717849	0	2	50,50	0,107
chrI	10717863	10718183	neuroPSI:1;readCounts:49	950	-	10717863	10718183	0	2	50,50	0,270
chrI	10708376	10708850	neuroPSI:1;readCounts:114	950	+	10708376	10708850	0	2	50,50	0,424
chrI	10709593	10709741	neuroPSI:1;readCounts:1434	950	+	10709593	10709741	0	2	50,50	0,98
chrI	10710087	10710230	neuroPSI:1;readCounts:935	950	+	10710087	10710230	0	2	50,50	0,93
chrI	10710191	10710337	neuroPSI:1;readCounts:759	950	+	10710191	10710337	0	2	50,50	0,96
chrI	10732743	10732890	neuroPSI:1;readCounts:2901	950	-	10732743	10732890	0	2	50,50	0,97
chrI	10733114	10733262	neuroPSI:1;readCounts:1735	950	-	10733114	10733262	0	2	50,50	0,98
chrI	10733287	10733437	neuroPSI:1;readCounts:1535	950	-	10733287	10733437	0	2	50,50	0,100
chrI	10733503	10733648	neuroPSI:1;readCounts:898	950	-	10733503	10733648	0	2	50,50	0,95
chrI	10730499	10730649	neuroPSI:1;readCounts:2209	950	+	10730499	10730649	0	2	50,50	0,100
chrI	10727996	10728697	neuroPSI:1;readCounts:1306	950	-	10727996	10728697	0	2	50,50	0,651
chrI	10726942	10727226	neuroPSI:1;readCounts:1870	950	+	10726942	10727226	0	2	50,50	0,234
chrI	10724362	10724846	neuroPSI:1;readCounts:32	950	-	10724362	10724846	0	2	50,50	0,434
chrI	10724911	10725053	neuroPSI:1;readCounts:25	950	-	10724911	10725053	0	2	50,50	0,92
chrI	10725251	10725401	neuroPSI:1;readCounts:29	950	-	10725251	10725401	0	2	50,50	0,100
chrI	10731249	10731402	neuroPSI:1;readCounts:6293	950	-	10731249	10731402	0	2	50,50	0,103
chrI	10731801	10732223	neuroPSI:0.003;readCounts:8	950	-	10731801	10732223	0	2	50,50	0,372
chrI	10731804	10732223	neuroPSI:0.997;readCounts:2655	950	-	10731804	10732223	0	2	50,50	0,369
chrI	10732264	10732415	neuroPSI:1;readCounts:1935	950	-	10732264	10732415	0	2	50,50	0,101
chrI	10741485	10741632	neuroPSI:1;readCounts:27	950	-	10741485	10741632	0	2	50,50	0,97
chrI	10741666	10741808	neuroPSI:1;readCounts:25	950	-	10741666	10741808	0	2	50,50	0,92
chrI	10741772	10741926	neuroPSI:1;readCounts:18	950	-	10741772	10741926	0	2	50,50	0,104
chrI	10741975	10743025	neuroPSI:1;readCounts:15	950	-	10741975	10743025	0	2	50,50	0,1000
chrI	10743037	10743390	neuroPSI:1;readCounts:9	950	-	10743037	10743390	0	2	50,50	0,303
chrI	10743449	10743594	neuroPSI:1;readCounts:10	950	-	10743449	10743594	0	2	50,50	0,95
chrI	10736767	10737372	neuroPSI:1;readCounts:325	950	+	10736767	10737372	0	2	50,50	0,555
chrI	10737410	10737554	neuroPSI:1;readCounts:550	950	+	10737410	10737554	0	2	50,50	0,94
chrI	10737574	10737846	neuroPSI:1;readCounts:689	950	+	10737574	10737846	0	2	50,50	0,222
chrI	10737845	10737990	neuroPSI:1;readCounts:808	950	+	10737845	10737990	0	2	50,50	0,95
chrI	10737984	10738236	neuroPSI:1;readCounts:1011	950	+	10737984	10738236	0	2	50,50	0,202
chrI	10738271	10738421	neuroPSI:1;readCounts:1305	950	+	10738271	10738421	0	2	50,50	0,100
chrI	10738477	10739037	neuroPSI:1;readCounts:2253	950	+	10738477	10739037	0	2	50,50	0,510
chrI	10739078	10739487	neuroPSI:0.975;readCounts:2570	950	+	10739078	10739487	0	2	50,50	0,359
chrI	10739078	10739536	neuroPSI:0.025;readCounts:67	950	+	10739078	10739536	0	2	50,50	0,408
chrI	10739554	10739704	neuroPSI:1;readCounts:3234	950	+	10739554	10739704	0	2	50,50	0,100
chrI	10734027	10734370	neuroPSI:1;readCounts:1881	950	+	10734027	10734370	0	2	50,50	0,293
chrI	10734441	10734600	neuroPSI:1;readCounts:3683	950	+	10734441	10734600	0	2	50,50	0,109
chrI	10734628	10734777	neuroPSI:1;readCounts:4462	950	+	10734628	10734777	0	2	50,50	0,99
chrI	10734762	10734921	neuroPSI:1;readCounts:5080	950	+	10734762	10734921	0	2	50,50	0,109
chrI	10735118	10735675	neuroPSI:0.999;readCounts:8967	950	+	10735118	10735675	0	2	50,50	0,507
chrI	10735118	10735679	neuroPSI:0.001;readCounts:9	950	+	10735118	10735679	0	2	50,50	0,511
chrI	10735700	10735855	neuroPSI:1;readCounts:8758	950	+	10735700	10735855	0	2	50,50	0,105
chrI	10735837	10736134	neuroPSI:1;readCounts:7979	950	+	10735837	10736134	0	2	50,50	0,247
chrI	10729000	10729824	neuroPSI:1;readCounts:1782	950	-	10729000	10729824	0	2	50,50	0,774
chrI	10729754	10729908	neuroPSI:1;readCounts:43	950	-	10729754	10729908	0	2	50,50	0,104
chrI	10729918	10730066	neuroPSI:1;readCounts:3171	950	-	10729918	10730066	0	2	50,50	0,98
chrI	10730058	10730217	neuroPSI:1;readCounts:2852	950	-	10730058	10730217	0	2	50,50	0,109
chrI	10720924	10721070	neuroPSI:1;readCounts:118	950	+	10720924	10721070	0	2	50,50	0,96
chrI	10721084	10721243	neuroPSI:1;readCounts:174	950	+	10721084	10721243	0	2	50,50	0,109
chrI	10721365	10722068	neuroPSI:1;readCounts:184	950	+	10721365	10722068	0	2	50,50	0,653
chrI	10722082	10722232	neuroPSI:1;readCounts:319	950	+	10722082	10722232	0	2	50,50	0,100
chrI	10722859	10723004	neuroPSI:1;readCounts:841	950	+	10722859	10723004	0	2	50,50	0,95
chrI	10723117	10723265	neuroPSI:1;readCounts:842	950	+	10723117	10723265	0	2	50,50	0,98
chrI	5965350	5965492	neuroPSI:1;readCounts:32	950	+	5965350	5965492	0	2	50,50	0,92
chrI	5965811	5965960	neuroPSI:1;readCounts:27	950	+	5965811	5965960	0	2	50,50	0,99
chrI	5965951	5966098	neuroPSI:1;readCounts:50	950	+	5965951	5966098	0	2	50,50	0,97
chrI	5966132	5966307	neuroPSI:1;readCounts:75	950	+	5966132	5966307	0	2	50,50	0,125
chrI	5966430	5966577	neuroPSI:1;readCounts:108	950	+	5966430	5966577	0	2	50,50	0,97
chrI	5966635	5966867	neuroPSI:1;readCounts:101	950	+	5966635	5966867	0	2	50,50	0,182
chrI	5967020	5967167	neuroPSI:1;readCounts:58	950	+	5967020	5967167	0	2	50,50	0,97
chrI	5959157	5959347	neuroPSI:0.001;readCounts:5	950	-	5959157	5959347	0	2	50,50	0,140
chrI	5959157	5959506	neuroPSI:0.999;readCounts:7895	950	-	5959157	5959506	0	2	50,50	0,299
chrI	5963051	5963226	neuroPSI:1;readCounts:200	950	-	5963051	5963226	0	2	50,50	0,125
chrI	5963412	5963560	neuroPSI:1;readCounts:169	950	-	5963412	5963560	0	2	50,50	0,98
chrI	5963535	5963682	neuroPSI:1;readCounts:159	950	-	5963535	5963682	0	2	50,50	0,97
chrI	5963836	5964113	neuroPSI:1;readCounts:69	950	-	5963836	5964113	0	2	50,50	0,227
chrI	5967405	5967554	neuroPSI:1;readCounts:2170	950	-	5967405	5967554	0	2	50,50	0,99
chrI	5967549	5967888	neuroPSI:1;readCounts:1935	950	-	5967549	5967888	0	2	50,50	0,289
chrI	5967901	5968181	neuroPSI:1;readCounts:2574	950	-	5967901	5968181	0	2	50,50	0,230
chrI	5968183	5968649	neuroPSI:1;readCounts:2577	950	-	5968183	5968649	0	2	50,50	0,416
chrI	5968654	5968860	neuroPSI:1;readCounts:2235	950	-	5968654	5968860	0	2	50,50	0,156
chrI	5968836	5969004	neuroPSI:1;readCounts:2008	950	-	5968836	5969004	0	2	50,50	0,118
chrI	5968953	5969108	neuroPSI:0.099;readCounts:13	950	-	5968953	5969108	0	2	50,50	0,105
chrI	5968953	5970352	neuroPSI:0.301;readCounts:118	950	-	5968953	5970352	0	2	50,50	0,1349
chrI	5969102	5969251	neuroPSI:1;readCounts:1938	950	-	5969102	5969251	0	2	50,50	0,99
chrI	5969182	5969489	neuroPSI:1;readCounts:1765	950	-	5969182	5969489	0	2	50,50	0,257
chrI	5969524	5969668	neuroPSI:1;readCounts:923	950	-	5969524	5969668	0	2	50,50	0,94
chrI	5969682	5969887	neuroPSI:1;readCounts:612	950	-	5969682	5969887	0	2	50,50	0,155
chrI	5969864	5970042	neuroPSI:1;readCounts:367	950	-	5969864	5970042	0	2	50,50	0,128
chrI	5970030	5970178	neuroPSI:0.843;readCounts:253	950	-	5970030	5970178	0	2	50,50	0,98
chrI	5970030	5970352	neuroPSI:0.12;readCounts:47	950	-	5970030	5970352	0	2	50,50	0,272
chrI	5970143	5970352	neuroPSI:0.579;readCounts:227	950	-	5970143	5970352	0	2	50,50	0,159
chrI	5970393	5970815	neuroPSI:1;readCounts:340	950	-	5970393	5970815	0	2	50,50	0,372
chrI	5970798	5970951	neuroPSI:1;readCounts:278	950	-	5970798	5970951	0	2	50,50	0,103
chrI	5970932	5971419	neuroPSI:1;readCounts:229	950	-	5970932	5971419	0	2	50,50	0,437
chrI	5971408	5972632	neuroPSI:1;readCounts:194	950	-	5971408	5972632	0	2	50,50	0,1174
chrI	5972693	5973213	neuroPSI:1;readCounts:98	950	-	5972693	5973213	0	2	50,50	0,470
chrI	5955104	5955620	neuroPSI:1;readCounts:195	950	+	5955104	5955620	0	2	50,50	0,466
chrI	5955609	5955754	neuroPSI:1;readCounts:241	950	+	5955609	5955754	0	2	50,50	0,95
chrI	5955849	5956085	neuroPSI:1;readCounts:596	950	+	5955849	5956085	0	2	50,50	0,186
chrI	5956072	5956678	neuroPSI:1;readCounts:753	950	+	5956072	5956678	0	2	50,50	0,556
chrI	5956671	5956829	neuroPSI:1;readCounts:711	950	+	5956671	5956829	0	2	50,50	0,108
chrI	5942436	5942622	neuroPSI:1;readCounts:131	950	+	5942436	5942622	0	2	50,50	0,136
chrI	5942609	5942876	neuroPSI:1;readCounts:163	950	+	5942609	5942876	0	2	50,50	0,217
chrI	5942899	5943758	neuroPSI:0.969;readCounts:189	950	+	5942899	5943758	0	2	50,50	0,809
chrI	5943595	5943758	neuroPSI:0.031;readCounts:6	950	+	5943595	5943758	0	2	50,50	0,113
chrI	5943964	5944112	neuroPSI:1;readCounts:435	950	+	5943964	5944112	0	2	50,50	0,98
chrI	5944141	5944398	neuroPSI:1;readCounts:663	950	+	5944141	5944398	0	2	50,50	0,207
chrI	5944428	5944930	neuroPSI:1;readCounts:697	950	+	5944428	5944930	0	2	50,50	0,452
chrI	5944941	5945095	neuroPSI:1;readCounts:9	950	+	5944941	5945095	0	2	50,50	0,104
chrI	5944995	5945355	neuroPSI:0.019;readCounts:15	950	+	5944995	5945355	0	2	50,50	0,310
chrI	5945029	5945355	neuroPSI:0.981;readCounts:786	950	+	5945029	5945355	0	2	50,50	0,276
chrI	5945374	5945521	neuroPSI:1;readCounts:807	950	+	5945374	5945521	0	2	50,50	0,97
chrI	5937501	5937650	neuroPSI:1;readCounts:237	950	+	5937501	5937650	0	2	50,50	0,99
chrI	5937659	5937835	neuroPSI:1;readCounts:238	950	+	5937659	5937835	0	2	50,50	0,126
chrI	5938103	5938266	neuroPSI:1;readCounts:652	950	+	5938103	5938266	0	2	50,50	0,113
chrI	5938440	5938640	neuroPSI:1;readCounts:1040	950	+	5938440	5938640	0	2	50,50	0,150
chrI	5934271	5934622	neuroPSI:1;readCounts:5	950	+	5934271	5934622	0	2	50,50	0,301
chrI	5935827	5936254	neuroPSI:1;readCounts:738	950	-	5935827	5936254	0	2	50,50	0,377
chrI	5936353	5936610	neuroPSI:1;readCounts:430	950	-	5936353	5936610	0	2	50,50	0,207
chrI	5936618	5936835	neuroPSI:0.951;readCounts:332	950	-	5936618	5936835	0	2	50,50	0,167
chrI	5936623	5936835	neuroPSI:0.049;readCounts:17	950	-	5936623	5936835	0	2	50,50	0,162
chrI	5945662	5945806	neuroPSI:1;readCounts:195	950	-	5945662	5945806	0	2	50,50	0,94
chrI	5945755	5945908	neuroPSI:0.716;readCounts:189	950	-	5945755	5945908	0	2	50,50	0,103
chrI	5945763	5945908	neuroPSI:0.284;readCounts:75	950	-	5945763	5945908	0	2	50,50	0,95
chrI	5946081	5946235	neuroPSI:1;readCounts:288	950	-	5946081	5946235	0	2	50,50	0,104
chrI	5946257	5946406	neuroPSI:1;readCounts:236	950	-	5946257	5946406	0	2	50,50	0,99
chrI	5946474	5946829	neuroPSI:1;readCounts:133	950	-	5946474	5946829	0	2	50,50	0,305
chrI	5946987	5947140	neuroPSI:1;readCounts:103	950	-	5946987	5947140	0	2	50,50	0,103
chrI	5947301	5947607	neuroPSI:1;readCounts:78	950	-	5947301	5947607	0	2	50,50	0,256
chrI	5957636	5958050	neuroPSI:1;readCounts:225	950	-	5957636	5958050	0	2	50,50	0,364
chrI	5958028	5958177	neuroPSI:0.928;readCounts:142	950	-	5958028	5958177	0	2	50,50	0,99
chrI	5958028	5958359	neuroPSI:0.072;readCounts:11	950	-	5958028	5958359	0	2	50,50	0,281
chrI	5958185	5958359	neuroPSI:0.911;readCounts:113	950	-	5958185	5958359	0	2	50,50	0,124
chrI	5958309	5958452	neuroPSI:1;readCounts:83	950	-	5958309	5958452	0	2	50,50	0,93
chrIV	3571064	3571430	neuroPSI:1;readCounts:6	950	+	3571064	3571430	0	2	50,50	0,316
chrIV	3571387	3571541	neuroPSI:1;readCounts:6	950	+	3571387	3571541	0	2	50,50	0,104
chrIV	3573845	3574128	neuroPSI:1;readCounts:6	950	+	3573845	3574128	0	2	50,50	0,233
chrIV	3574167	3574316	neuroPSI:1;readCounts:12	950	+	3574167	3574316	0	2	50,50	0,99
chrIV	3574487	3575042	neuroPSI:1;readCounts:9	950	+	3574487	3575042	0	2	50,50	0,505
chrIV	3575118	3575303	neuroPSI:1;readCounts:10	950	+	3575118	3575303	0	2	50,50	0,135
chrIV	3575290	3575564	neuroPSI:1;readCounts:10	950	+	3575290	3575564	0	2	50,50	0,224
chrIV	3575664	3576099	neuroPSI:1;readCounts:26	950	+	3575664	3576099	0	2	50,50	0,385
chrIV	3576242	3576932	neuroPSI:1;readCounts:24	950	+	3576242	3576932	0	2	50,50	0,640
chrIV	3577007	3577504	neuroPSI:1;readCounts:45	950	+	3577007	3577504	0	2	50,50	0,447
chrIV	3565446	3566403	neuroPSI:1;readCounts:59	950	+	3565446	3566403	0	2	50,50	0,907
chrIV	3566428	3566575	neuroPSI:0.818;readCounts:54	950	+	3566428	3566575	0	2	50,50	0,97
chrIV	3566428	3566778	neuroPSI:0.154;readCounts:12	950	+	3566428	3566778	0	2	50,50	0,300
chrIV	3566631	3566778	neuroPSI:0.846;readCounts:66	950	+	3566631	3566778	0	2	50,50	0,97
chrIV	3566798	3566978	neuroPSI:1;readCounts:107	950	+	3566798	3566978	0	2	50,50	0,130
chrIV	3567091	3567585	neuroPSI:1;readCounts:125	950	+	3567091	3567585	0	2	50,50	0,444
chrIV	3540280	3540425	neuroPSI:1;readCounts:56	950	+	3540280	3540425	0	2	50,50	0,95
chrIV	3540439	3541150	neuroPSI:1;readCounts:37	950	+	3540439	3541150	0	2	50,50	0,661
chrIV	3541314	3541458	neuroPSI:1;readCounts:61	950	+	3541314	3541458	0	2	50,50	0,94
chrIV	3541472	3541803	neuroPSI:1;readCounts:90	950	+	3541472	3541803	0	2	50,50	0,281
chrIV	3541964	3542106	neuroPSI:1;readCounts:91	950	+	3541964	3542106	0	2	50,50	0,92
chrIV	3542120	3542265	neuroPSI:1;readCounts:104	950	+	3542120	3542265	0	2	50,50	0,95
chrIV	3542898	3543044	neuroPSI:1;readCounts:191	950	+	3542898	3543044	0	2	50,50	0,96
chrIV	3543157	3543518	neuroPSI:0.883;readCounts:248	950	+	3543157	3543518	0	2	50,50	0,311
chrIV	3543288	3543518	neuroPSI:0.036;readCounts:10	950	+	3543288	3543518	0	2	50,50	0,180
chrIV	3543358	3543518	neuroPSI:0.082;readCounts:23	950	+	3543358	3543518	0	2	50,50	0,110
chrIV	3544019	3544466	neuroPSI:1;readCounts:279	950	-	3544019	3544466	0	2	50,50	0,397
chrIV	3544501	3544806	neuroPSI:1;readCounts:149	950	-	3544501	3544806	0	2	50,50	0,255
chrIV	3544838	3544987	neuroPSI:1;readCounts:205	950	-	3544838	3544987	0	2	50,50	0,99
chrIV	3544981	3545132	neuroPSI:1;readCounts:77	950	-	3544981	3545132	0	2	50,50	0,101
chrIV	3545155	3545612	neuroPSI:1;readCounts:69	950	-	3545155	3545612	0	2	50,50	0,407
chrIV	3545651	3545798	neuroPSI:1;readCounts:52	950	-	3545651	3545798	0	2	50,50	0,97
chrIV	3545796	3546187	neuroPSI:1;readCounts:40	950	-	3545796	3546187	0	2	50,50	0,341
chrIV	3546183	3546496	neuroPSI:0.179;readCounts:7	950	-	3546183	3546496	0	2	50,50	0,263
chrIV	3546183	3547564	neuroPSI:0.821;readCounts:32	950	-	3546183	3547564	0	2	50,50	0,1331
chrIV	3551301	3551634	neuroPSI:1;readCounts:671	950	-	3551301	3551634	0	2	50,50	0,283
chrIV	3551750	3552406	neuroPSI:1;readCounts:526	950	-	3551750	3552406	0	2	50,50	0,606
chrIV	3552636	3553316	neuroPSI:1;readCounts:268	950	-	3552636	3553316	0	2	50,50	0,630
chrIV	3553468	3554027	neuroPSI:1;readCounts:136	950	-	3553468	3554027	0	2	50,50	0,509
chrIV	3554082	3554222	neuroPSI:1;readCounts:104	950	-	3554082	3554222	0	2	50,50	0,90
chrIV	3554495	3554656	neuroPSI:1;readCounts:42	950	-	3554495	3554656	0	2	50,50	0,111
chrIV	3554679	3554828	neuroPSI:1;readCounts:37	950	-	3554679	3554828	0	2	50,50	0,99
chrIV	3554844	3555518	neuroPSI:1;readCounts:36	950	-	3554844	3555518	0	2	50,50	0,624
chrIV	3555644	3555789	neuroPSI:1;readCounts:14	950	-	3555644	3555789	0	2	50,50	0,95
chrIV	3555997	3556144	neuroPSI:1;readCounts:16	950	-	3555997	3556144	0	2	50,50	0,97
chrIV	3556136	3556283	neuroPSI:1;readCounts:7	950	-	3556136	3556283	0	2	50,50	0,97
chrIV	3556314	3556468	neuroPSI:1;readCounts:21	950	-	3556314	3556468	0	2	50,50	0,104
chrIV	3556517	3557339	neuroPSI:1;readCounts:23	950	-	3556517	3557339	0	2	50,50	0,772
chrV	3955850	3955998	neuroPSI:1;readCounts:13	950	-	3955850	3955998	0	2	50,50	0,98
chrV	3956171	3956324	neuroPSI:1;readCounts:6	950	-	3956171	3956324	0	2	50,50	0,103
chrV	3956435	3956579	neuroPSI:1;readCounts:11	950	-	3956435	3956579	0	2	50,50	0,94
chrV	3958320	3958463	neuroPSI:1;readCounts:130	950	-	3958320	3958463	0	2	50,50	0,93
chrV	3958636	3958782	neuroPSI:1;readCounts:60	950	-	3958636	3958782	0	2	50,50	0,96
chrV	3958893	3959485	neuroPSI:1;readCounts:44	950	-	3958893	3959485	0	2	50,50	0,542
chrV	3959502	3959652	neuroPSI:1;readCounts:25	950	-	3959502	3959652	0	2	50,50	0,100
chrV	3959858	3960019	neuroPSI:1;readCounts:14	950	-	3959858	3960019	0	2	50,50	0,111
chrV	3960295	3961157	neuroPSI:1;readCounts:6	950	-	3960295	3961157	0	2	50,50	0,812
chrV	3961844	3961990	neuroPSI:1;readCounts:10	950	-	3961844	3961990	0	2	50,50	0,96
chrV	3964951	3965098	neuroPSI:1;readCounts:468	950	-	3964951	3965098	0	2	50,50	0,97
chrV	3965271	3966631	neuroPSI:1;readCounts:294	950	-	3965271	3966631	0	2	50,50	0,1310
chrV	3966742	3966887	neuroPSI:1;readCounts:195	950	-	3966742	3966887	0	2	50,50	0,95
chrV	3966904	3967053	neuroPSI:1;readCounts:132	950	-	3966904	3967053	0	2	50,50	0,99
chrV	3967635	3967777	neuroPSI:1;readCounts:19	950	-	3967635	3967777	0	2	50,50	0,92
chrV	3968318	3968469	neuroPSI:1;readCounts:31	950	-	3968318	3968469	0	2	50,50	0,101
chrV	3968642	3969125	neuroPSI:1;readCounts:33	950	-	3968642	3969125	0	2	50,50	0,433
chrV	3969236	3969388	neuroPSI:1;readCounts:15	950	-	3969236	3969388	0	2	50,50	0,102
chrV	3969405	3969557	neuroPSI:1;readCounts:22	950	-	3969405	3969557	0	2	50,50	0,102
chrV	3969763	3970021	neuroPSI:1;readCounts:9	950	-	3969763	3970021	0	2	50,50	0,208
chrV	3970856	3971004	neuroPSI:1;readCounts:13	950	-	3970856	3971004	0	2	50,50	0,98
chrV	3971177	3971808	neuroPSI:1;readCounts:5	950	-	3971177	3971808	0	2	50,50	0,581
chrV	3972387	3972531	neuroPSI:1;readCounts:6	950	-	3972387	3972531	0	2	50,50	0,94
chrV	3978947	3979093	neuroPSI:1;readCounts:623	950	-	3978947	3979093	0	2	50,50	0,96
chrV	3989452	3989629	neuroPSI:1;readCounts:2598	950	+	3989452	3989629	0	2	50,50	0,127
chrV	3987974	3988156	neuroPSI:1;readCounts:925	950	+	3987974	3988156	0	2	50,50	0,132
chrV	3984487	3984656	neuroPSI:1;readCounts:538	950	+	3984487	3984656	0	2	50,50	0,119
chrV	3982422	3982570	neuroPSI:1;readCounts:988	950	+	3982422	3982570	0	2	50,50	0,98
chrV	3980218	3980435	neuroPSI:1;readCounts:798	950	+	3980218	3980435	0	2	50,50	0,167
chrV	3977924	3978065	neuroPSI:1;readCounts:11	950	+	3977924	3978065	0	2	50,50	0,91
chrV	3978040	3978186	neuroPSI:1;readCounts:12	950	+	3978040	3978186	0	2	50,50	0,96
chrV	3978399	3978808	neuroPSI:1;readCounts:14	950	+	3978399	3978808	0	2	50,50	0,359
chrV	3975547	3975694	neuroPSI:1;readCounts:14	950	+	3975547	3975694	0	2	50,50	0,97
chrV	3975669	3975816	neuroPSI:1;readCounts:19	950	+	3975669	3975816	0	2	50,50	0,97
chrV	3976029	3976174	neuroPSI:1;readCounts:8	950	+	3976029	3976174	0	2	50,50	0,95
chrIV	8159446	8159746	neuroPSI:1;readCounts:27	950	+	8159446	8159746	0	2	50,50	0,250
chrIV	8160094	8160262	neuroPSI:0.143;readCounts:8	950	+	8160094	8160262	0	2	50,50	0,118
chrIV	8160094	8160520	neuroPSI:0.857;readCounts:48	950	+	8160094	8160520	0	2	50,50	0,376
chrIV	8160776	8160927	neuroPSI:1;readCounts:315	950	+	8160776	8160927	0	2	50,50	0,101
chrIV	8161266	8161524	neuroPSI:1;readCounts:1089	950	+	8161266	8161524	0	2	50,50	0,208
chrIV	8161613	8161779	neuroPSI:1;readCounts:1649	950	+	8161613	8161779	0	2	50,50	0,116
chrIV	8152478	8152646	neuroPSI:1;readCounts:24	950	+	8152478	8152646	0	2	50,50	0,118
chrIV	8152688	8153035	neuroPSI:1;readCounts:25	950	+	8152688	8153035	0	2	50,50	0,297
chrIV	8153891	8154069	neuroPSI:1;readCounts:343	950	+	8153891	8154069	0	2	50,50	0,128
chrIV	8154300	8154498	neuroPSI:1;readCounts:483	950	+	8154300	8154498	0	2	50,50	0,148
chrIV	8148904	8149048	neuroPSI:1;readCounts:140	950	+	8148904	8149048	0	2	50,50	0,94
chrIV	8149452	8149981	neuroPSI:0.017;readCounts:12	950	+	8149452	8149981	0	2	50,50	0,479
chrIV	8149514	8149981	neuroPSI:0.983;readCounts:714	950	+	8149514	8149981	0	2	50,50	0,417
chrIV	8150183	8150737	neuroPSI:0.004;readCounts:10	950	+	8150183	8150737	0	2	50,50	0,504
chrIV	8150246	8150737	neuroPSI:0.996;readCounts:2279	950	+	8150246	8150737	0	2	50,50	0,441
chrIV	8155479	8155623	neuroPSI:1;readCounts:200	950	-	8155479	8155623	0	2	50,50	0,94
chrIV	8155931	8156077	neuroPSI:1;readCounts:119	950	-	8155931	8156077	0	2	50,50	0,96
chrIV	8162080	8162339	neuroPSI:0.062;readCounts:32	950	-	8162080	8162339	0	2	50,50	0,209
chrIV	8162080	8162626	neuroPSI:0.933;readCounts:485	950	-	8162080	8162626	0	2	50,50	0,496
chrIV	8162479	8162626	neuroPSI:0.067;readCounts:35	950	-	8162479	8162626	0	2	50,50	0,97
chrIV	8162646	8162797	neuroPSI:1;readCounts:567	950	-	8162646	8162797	0	2	50,50	0,101
chrIV	8162747	8162892	neuroPSI:1;readCounts:568	950	-	8162747	8162892	0	2	50,50	0,95
chrIV	8162898	8163048	neuroPSI:1;readCounts:381	950	-	8162898	8163048	0	2	50,50	0,100
chrIV	8163007	8163157	neuroPSI:1;readCounts:316	950	-	8163007	8163157	0	2	50,50	0,100
chrIV	8163446	8163731	neuroPSI:1;readCounts:92	950	-	8163446	8163731	0	2	50,50	0,235
chrIV	8165007	8165204	neuroPSI:1;readCounts:566	950	-	8165007	8165204	0	2	50,50	0,147
chrIV	8165407	8165556	neuroPSI:1;readCounts:213	950	-	8165407	8165556	0	2	50,50	0,99
chrIV	8165516	8165855	neuroPSI:1;readCounts:173	950	-	8165516	8165855	0	2	50,50	0,289
chrIV	8167261	8167487	neuroPSI:1;readCounts:733	950	-	8167261	8167487	0	2	50,50	0,176
chrIV	8167507	8167652	neuroPSI:1;readCounts:665	950	-	8167507	8167652	0	2	50,50	0,95
chrIV	8167602	8167964	neuroPSI:1;readCounts:564	950	-	8167602	8167964	0	2	50,50	0,312
chrIV	8167970	8168114	neuroPSI:1;readCounts:415	950	-	8167970	8168114	0	2	50,50	0,94
chrIV	8168073	8168217	neuroPSI:1;readCounts:350	950	-	8168073	8168217	0	2	50,50	0,94
chrIV	8168506	8168708	neuroPSI:1;readCounts:120	950	-	8168506	8168708	0	2	50,50	0,152
chrV	9134454	9134598	neuroPSI:1;readCounts:670	950	+	9134454	9134598	0	2	50,50	0,94
chrV	9134627	9134780	neuroPSI:1;readCounts:1037	950	+	9134627	9134780	0	2	50,50	0,103
chrV	9134786	9134934	neuroPSI:1;readCounts:1416	950	+	9134786	9134934	0	2	50,50	0,98
chrV	9134944	9135090	neuroPSI:1;readCounts:1496	950	+	9134944	9135090	0	2	50,50	0,96
chrV	9135136	9135275	neuroPSI:1;readCounts:69	950	+	9135136	9135275	0	2	50,50	0,89
chrV	9166113	9166264	neuroPSI:1;readCounts:345	950	-	9166113	9166264	0	2	50,50	0,101
chrV	9166332	9166896	neuroPSI:1;readCounts:240	950	-	9166332	9166896	0	2	50,50	0,514
chrV	9166952	9167115	neuroPSI:1;readCounts:192	950	-	9166952	9167115	0	2	50,50	0,113
chrV	9167166	9167319	neuroPSI:1;readCounts:135	950	-	9167166	9167319	0	2	50,50	0,103
chrV	9167294	9167499	neuroPSI:1;readCounts:171	950	-	9167294	9167499	0	2	50,50	0,155
chrV	9167543	9167947	neuroPSI:1;readCounts:83	950	-	9167543	9167947	0	2	50,50	0,354
chrV	9155705	9156164	neuroPSI:0.006;readCounts:6	950	-	9155705	9156164	0	2	50,50	0,409
chrV	9155705	9156465	neuroPSI:0.994;readCounts:1023	950	-	9155705	9156465	0	2	50,50	0,710
chrV	9156426	9156584	neuroPSI:1;readCounts:800	950	-	9156426	9156584	0	2	50,50	0,108
chrV	9156545	9156698	neuroPSI:1;readCounts:498	950	-	9156545	9156698	0	2	50,50	0,103
chrV	9135655	9135801	neuroPSI:1;readCounts:7	950	-	9135655	9135801	0	2	50,50	0,96
chrV	9139080	9139226	neuroPSI:1;readCounts:60	950	-	9139080	9139226	0	2	50,50	0,96
chrV	9139232	9139373	neuroPSI:0.11;readCounts:9	950	-	9139232	9139373	0	2	50,50	0,91
chrV	9139232	9139380	neuroPSI:0.89;readCounts:73	950	-	9139232	9139380	0	2	50,50	0,98
chrV	9139481	9139630	neuroPSI:1;readCounts:59	950	-	9139481	9139630	0	2	50,50	0,99
chrV	9139862	9140011	neuroPSI:1;readCounts:41	950	-	9139862	9140011	0	2	50,50	0,99
chrV	9140031	9140176	neuroPSI:1;readCounts:42	950	-	9140031	9140176	0	2	50,50	0,95
chrV	9140259	9140405	neuroPSI:1;readCounts:13	950	-	9140259	9140405	0	2	50,50	0,96
chrV	9140446	9140854	neuroPSI:1;readCounts:5	950	-	9140446	9140854	0	2	50,50	0,358
chrV	9140856	9141005	neuroPSI:1;readCounts:17	950	-	9140856	9141005	0	2	50,50	0,99
chrV	9140980	9141129	neuroPSI:1;readCounts:12	950	-	9140980	9141129	0	2	50,50	0,99
chrV	9144929	9145088	neuroPSI:1;readCounts:54	950	-	9144929	9145088	0	2	50,50	0,109
chrV	9145723	9145927	neuroPSI:1;readCounts:6	950	-	9145723	9145927	0	2	50,50	0,154
chrV	9146408	9146795	neuroPSI:1;readCounts:8	950	-	9146408	9146795	0	2	50,50	0,337
chrV	9152852	9152995	neuroPSI:1;readCounts:301	950	-	9152852	9152995	0	2	50,50	0,93
chrV	9153009	9153396	neuroPSI:1;readCounts:251	950	-	9153009	9153396	0	2	50,50	0,337
chrV	9153389	9153711	neuroPSI:1;readCounts:203	950	-	9153389	9153711	0	2	50,50	0,272
chrV	9153723	9153872	neuroPSI:1;readCounts:121	950	-	9153723	9153872	0	2	50,50	0,99
chrV	9153918	9154063	neuroPSI:1;readCounts:106	950	-	9153918	9154063	0	2	50,50	0,95
chrV	9154095	9154237	neuroPSI:1;readCounts:47	950	-	9154095	9154237	0	2	50,50	0,92
chrV	9154221	9154379	neuroPSI:1;readCounts:23	950	-	9154221	9154379	0	2	50,50	0,108
chrV	9154396	9154540	neuroPSI:1;readCounts:25	950	-	9154396	9154540	0	2	50,50	0,94
chrV	9154499	9154839	neuroPSI:1;readCounts:24	950	-	9154499	9154839	0	2	50,50	0,290
chrV	9159826	9159995	neuroPSI:0.308;readCounts:8	950	-	9159826	9159995	0	2	50,50	0,119
chrV	9159844	9159995	neuroPSI:0.692;readCounts:18	950	-	9159844	9159995	0	2	50,50	0,101
chrV	9160418	9160566	neuroPSI:1;readCounts:4633	950	-	9160418	9160566	0	2	50,50	0,98
chrV	9162774	9162928	neuroPSI:1;readCounts:1779	950	-	9162774	9162928	0	2	50,50	0,104
chrV	9164487	9164656	neuroPSI:1;readCounts:62	950	-	9164487	9164656	0	2	50,50	0,119
chrV	9165079	9165229	neuroPSI:0.985;readCounts:3667	950	-	9165079	9165229	0	2	50,50	0,100
chrV	9165079	9165241	neuroPSI:0.015;readCounts:56	950	-	9165079	9165241	0	2	50,50	0,112
chrV	9168922	9169077	neuroPSI:1;readCounts:242	950	-	9168922	9169077	0	2	50,50	0,105
chrV	9169210	9169356	neuroPSI:1;readCounts:158	950	-	9169210	9169356	0	2	50,50	0,96
chrV	9169878	9170043	neuroPSI:1;readCounts:43	950	-	9169878	9170043	0	2	50,50	0,115
chrV	9170113	9170258	neuroPSI:1;readCounts:42	950	-	9170113	9170258	0	2	50,50	0,95
chrV	9170249	9170395	neuroPSI:1;readCounts:23	950	-	9170249	9170395	0	2	50,50	0,96
chrV	9170600	9170743	neuroPSI:1;readCounts:10	950	-	9170600	9170743	0	2	50,50	0,93
chrV	9170840	9170984	neuroPSI:1;readCounts:10	950	-	9170840	9170984	0	2	50,50	0,94
chrV	9170984	9171128	neuroPSI:1;readCounts:16	950	-	9170984	9171128	0	2	50,50	0,94
chrV	9171340	9171489	neuroPSI:1;readCounts:8	950	-	9171340	9171489	0	2	50,50	0,99
chrV	9171910	9172056	neuroPSI:1;readCounts:5	950	-	9171910	9172056	0	2	50,50	0,96
chrV	9172092	9172236	neuroPSI:1;readCounts:6	950	-	9172092	9172236	0	2	50,50	0,94
chrV	9172456	9172666	neuroPSI:1;readCounts:7	950	-	9172456	9172666	0	2	50,50	0,160
chrII	7756108	7756258	neuroPSI:0.057;readCounts:6	950	+	7756108	7756258	0	2	50,50	0,100
chrII	7756108	7756267	neuroPSI:0.943;readCounts:100	950	+	7756108	7756267	0	2	50,50	0,109
chrII	7756247	7756397	neuroPSI:1;readCounts:107	950	+	7756247	7756397	0	2	50,50	0,100
chrII	7756358	7756513	neuroPSI:1;readCounts:149	950	+	7756358	7756513	0	2	50,50	0,105
chrII	7726380	7726631	neuroPSI:1;readCounts:295	950	+	7726380	7726631	0	2	50,50	0,201
chrII	7726814	7727115	neuroPSI:1;readCounts:34	950	+	7726814	7727115	0	2	50,50	0,251
chrII	7727139	7727286	neuroPSI:1;readCounts:19	950	+	7727139	7727286	0	2	50,50	0,97
chrII	7727639	7727884	neuroPSI:1;readCounts:10	950	+	7727639	7727884	0	2	50,50	0,195
chrII	7727873	7728018	neuroPSI:1;readCounts:13	950	+	7727873	7728018	0	2	50,50	0,95
chrII	7728038	7728183	neuroPSI:1;readCounts:13	950	+	7728038	7728183	0	2	50,50	0,95
chrII	7728152	7728300	neuroPSI:1;readCounts:11	950	+	7728152	7728300	0	2	50,50	0,98
chrII	7728269	7728415	neuroPSI:1;readCounts:15	950	+	7728269	7728415	0	2	50,50	0,96
chrII	7729851	7730077	neuroPSI:1;readCounts:59	950	+	7729851	7730077	0	2	50,50	0,176
chrII	7730110	7730555	neuroPSI:0.521;readCounts:49	950	+	7730110	7730555	0	2	50,50	0,395
chrII	7730110	7750329	neuroPSI:0.479;readCounts:45	950	+	7730110	7750329	0	2	50,50	0,20169
chrII	7730719	7731004	neuroPSI:1;readCounts:74	950	+	7730719	7731004	0	2	50,50	0,235
chrII	7750359	7750512	neuroPSI:1;readCounts:329	950	+	7750359	7750512	0	2	50,50	0,103
chrII	7750491	7750665	neuroPSI:1;readCounts:379	950	+	7750491	7750665	0	2	50,50	0,124
chrII	7750666	7750841	neuroPSI:1;readCounts:286	950	+	7750666	7750841	0	2	50,50	0,125
chrII	7750847	7751122	neuroPSI:0.066;readCounts:19	950	+	7750847	7751122	0	2	50,50	0,225
chrII	7750847	7751336	neuroPSI:0.934;readCounts:269	950	+	7750847	7751336	0	2	50,50	0,439
chrII	7751368	7751521	neuroPSI:1;readCounts:352	950	+	7751368	7751521	0	2	50,50	0,103
chrII	7751572	7751717	neuroPSI:1;readCounts:486	950	+	7751572	7751717	0	2	50,50	0,95
chrII	7751692	7751839	neuroPSI:1;readCounts:399	950	+	7751692	7751839	0	2	50,50	0,97
chrII	7751875	7752020	neuroPSI:1;readCounts:473	950	+	7751875	7752020	0	2	50,50	0,95
chrII	7752020	7752358	neuroPSI:1;readCounts:500	950	+	7752020	7752358	0	2	50,50	0,288
chrII	7752835	7752989	neuroPSI:1;readCounts:524	950	-	7752835	7752989	0	2	50,50	0,104
chrII	7752961	7753332	neuroPSI:1;readCounts:424	950	-	7752961	7753332	0	2	50,50	0,321
chrII	7753394	7753547	neuroPSI:1;readCounts:267	950	-	7753394	7753547	0	2	50,50	0,103
chrII	7754717	7754882	neuroPSI:1;readCounts:917	950	-	7754717	7754882	0	2	50,50	0,115
chrII	7754932	7755095	neuroPSI:1;readCounts:566	950	-	7754932	7755095	0	2	50,50	0,113
chrII	7757258	7757404	neuroPSI:1;readCounts:5444	950	-	7757258	7757404	0	2	50,50	0,96
chrII	7757511	7757659	neuroPSI:1;readCounts:5913	950	-	7757511	7757659	0	2	50,50	0,98
chrII	7757712	7757859	neuroPSI:1;readCounts:4686	950	-	7757712	7757859	0	2	50,50	0,97
chrII	7757862	7758008	neuroPSI:1;readCounts:4192	950	-	7757862	7758008	0	2	50,50	0,96
chrII	7758002	7758151	neuroPSI:1;readCounts:3398	950	-	7758002	7758151	0	2	50,50	0,99
chrII	7758162	7758310	neuroPSI:1;readCounts:1480	950	-	7758162	7758310	0	2	50,50	0,98
chrII	7758340	7758555	neuroPSI:1;readCounts:76	950	-	7758340	7758555	0	2	50,50	0,165
chrII	7763025	7763173	neuroPSI:1;readCounts:6	950	-	7763025	7763173	0	2	50,50	0,98
chrV	5240999	5241294	neuroPSI:1;readCounts:194	950	-	5240999	5241294	0	2	50,50	0,245
chrV	5241460	5241628	neuroPSI:1;readCounts:144	950	-	5241460	5241628	0	2	50,50	0,118
chrV	5241692	5241840	neuroPSI:1;readCounts:61	950	-	5241692	5241840	0	2	50,50	0,98
chrV	5242510	5242659	neuroPSI:1;readCounts:23	950	-	5242510	5242659	0	2	50,50	0,99
chrV	5242652	5242796	neuroPSI:1;readCounts:17	950	-	5242652	5242796	0	2	50,50	0,94
chrV	5242858	5243018	neuroPSI:1;readCounts:13	950	-	5242858	5243018	0	2	50,50	0,110
chrV	5274222	5274375	neuroPSI:1;readCounts:2052	950	+	5274222	5274375	0	2	50,50	0,103
chrV	5274521	5274668	neuroPSI:1;readCounts:2944	950	+	5274521	5274668	0	2	50,50	0,97
chrV	5274840	5275283	neuroPSI:1;readCounts:3534	950	+	5274840	5275283	0	2	50,50	0,393
chrV	5269559	5269704	neuroPSI:1;readCounts:833	950	+	5269559	5269704	0	2	50,50	0,95
chrV	5269703	5269854	neuroPSI:1;readCounts:5	950	+	5269703	5269854	0	2	50,50	0,101
chrV	5269837	5269985	neuroPSI:1;readCounts:1801	950	+	5269837	5269985	0	2	50,50	0,98
chrV	5270377	5270525	neuroPSI:1;readCounts:3806	950	+	5270377	5270525	0	2	50,50	0,98
chrV	5267855	5268026	neuroPSI:1;readCounts:53	950	+	5267855	5268026	0	2	50,50	0,121
chrV	5267981	5268131	neuroPSI:1;readCounts:54	950	+	5267981	5268131	0	2	50,50	0,100
chrV	5268153	5268454	neuroPSI:1;readCounts:98	950	+	5268153	5268454	0	2	50,50	0,251
chrV	5256182	5256375	neuroPSI:1;readCounts:7	950	-	5256182	5256375	0	2	50,50	0,143
chrV	5258130	5258278	neuroPSI:1;readCounts:53	950	-	5258130	5258278	0	2	50,50	0,98
chrV	5258408	5258560	neuroPSI:1;readCounts:15	950	-	5258408	5258560	0	2	50,50	0,102
chrV	5258796	5259296	neuroPSI:1;readCounts:12	950	-	5258796	5259296	0	2	50,50	0,450
chrV	5259352	5259493	neuroPSI:1;readCounts:12	950	-	5259352	5259493	0	2	50,50	0,91
chrV	5264059	5264207	neuroPSI:1;readCounts:46	950	-	5264059	5264207	0	2	50,50	0,98
chrV	5264334	5264487	neuroPSI:1;readCounts:14	950	-	5264334	5264487	0	2	50,50	0,103
chrV	5264723	5265394	neuroPSI:1;readCounts:20	950	-	5264723	5265394	0	2	50,50	0,621
chrV	5265450	5265600	neuroPSI:1;readCounts:45	950	-	5265450	5265600	0	2	50,50	0,100
chrV	5276140	5276318	neuroPSI:1;readCounts:437	950	-	5276140	5276318	0	2	50,50	0,128
chrV	5276912	5277363	neuroPSI:1;readCounts:102	950	-	5276912	5277363	0	2	50,50	0,401
chrV	5277503	5277653	neuroPSI:1;readCounts:107	950	-	5277503	5277653	0	2	50,50	0,100
chrV	5277834	5277985	neuroPSI:1;readCounts:57	950	-	5277834	5277985	0	2	50,50	0,101
chrV	11727992	11728281	neuroPSI:1;readCounts:43	950	-	11727992	11728281	0	2	50,50	0,239
chrV	11728285	11728435	neuroPSI:1;readCounts:37	950	-	11728285	11728435	0	2	50,50	0,100
chrV	11728469	11728768	neuroPSI:1;readCounts:60	950	-	11728469	11728768	0	2	50,50	0,249
chrV	11728802	11728949	neuroPSI:1;readCounts:43	950	-	11728802	11728949	0	2	50,50	0,97
chrV	11728944	11729091	neuroPSI:1;readCounts:53	950	-	11728944	11729091	0	2	50,50	0,97
chrV	11729201	11729368	neuroPSI:1;readCounts:17	950	-	11729201	11729368	0	2	50,50	0,117
chrV	11729413	11729560	neuroPSI:1;readCounts:18	950	-	11729413	11729560	0	2	50,50	0,97
chrV	11729611	11729757	neuroPSI:1;readCounts:7	950	-	11729611	11729757	0	2	50,50	0,96
chrV	11729788	11729954	neuroPSI:1;readCounts:6	950	-	11729788	11729954	0	2	50,50	0,116
chrV	11733771	11733914	neuroPSI:1;readCounts:20	950	-	11733771	11733914	0	2	50,50	0,93
chrV	11733966	11734113	neuroPSI:1;readCounts:23	950	-	11733966	11734113	0	2	50,50	0,97
chrV	11734129	11734486	neuroPSI:1;readCounts:40	950	-	11734129	11734486	0	2	50,50	0,307
chrV	11734524	11734671	neuroPSI:1;readCounts:27	950	-	11734524	11734671	0	2	50,50	0,97
chrV	11734832	11734987	neuroPSI:1;readCounts:16	950	-	11734832	11734987	0	2	50,50	0,105
chrV	11735016	11735166	neuroPSI:1;readCounts:18	950	-	11735016	11735166	0	2	50,50	0,100
chrV	11735210	11735366	neuroPSI:1;readCounts:10	950	-	11735210	11735366	0	2	50,50	0,106
chrV	11735674	11735818	neuroPSI:1;readCounts:6	950	-	11735674	11735818	0	2	50,50	0,94
chrV	11736452	11736599	neuroPSI:1;readCounts:5	950	-	11736452	11736599	0	2	50,50	0,97
chrV	11736604	11736755	neuroPSI:1;readCounts:5	950	-	11736604	11736755	0	2	50,50	0,101
chrV	11719062	11720020	neuroPSI:1;readCounts:525	950	-	11719062	11720020	0	2	50,50	0,908
chrV	11720184	11720538	neuroPSI:1;readCounts:289	950	-	11720184	11720538	0	2	50,50	0,304
chrV	11720543	11720818	neuroPSI:1;readCounts:245	950	-	11720543	11720818	0	2	50,50	0,225
chrV	11721239	11721388	neuroPSI:1;readCounts:87	950	-	11721239	11721388	0	2	50,50	0,99
chrV	11721468	11722114	neuroPSI:1;readCounts:46	950	-	11721468	11722114	0	2	50,50	0,596
chrV	11722289	11722443	neuroPSI:1;readCounts:29	950	-	11722289	11722443	0	2	50,50	0,104
chrV	11722441	11722592	neuroPSI:1;readCounts:27	950	-	11722441	11722592	0	2	50,50	0,101
chrV	11722669	11723391	neuroPSI:1;readCounts:25	950	-	11722669	11723391	0	2	50,50	0,672
chrV	11723382	11723527	neuroPSI:1;readCounts:20	950	-	11723382	11723527	0	2	50,50	0,95
chrV	11723502	11723804	neuroPSI:1;readCounts:22	950	-	11723502	11723804	0	2	50,50	0,252
chrV	11723897	11724299	neuroPSI:1;readCounts:18	950	-	11723897	11724299	0	2	50,50	0,352
chrV	11724452	11725000	neuroPSI:1;readCounts:14	950	-	11724452	11725000	0	2	50,50	0,498
chrV	11725085	11725227	neuroPSI:1;readCounts:14	950	-	11725085	11725227	0	2	50,50	0,92
chrV	11725386	11725533	neuroPSI:1;readCounts:5	950	-	11725386	11725533	0	2	50,50	0,97
chrV	11725528	11725680	neuroPSI:1;readCounts:7	950	-	11725528	11725680	0	2	50,50	0,102
chrV	11731332	11731478	neuroPSI:1;readCounts:1716	950	-	11731332	11731478	0	2	50,50	0,96
chrV	11731479	11731682	neuroPSI:1;readCounts:1769	950	-	11731479	11731682	0	2	50,50	0,153
chrV	11732257	11732415	neuroPSI:1;readCounts:399	950	-	11732257	11732415	0	2	50,50	0,108
chrV	11732573	11732721	neuroPSI:1;readCounts:208	950	-	11732573	11732721	0	2	50,50	0,98
chrV	11732845	11732989	neuroPSI:1;readCounts:179	950	-	11732845	11732989	0	2	50,50	0,94
chrV	11732994	11733141	neuroPSI:1;readCounts:97	950	-	11732994	11733141	0	2	50,50	0,97
chrV	11733301	11733443	neuroPSI:1;readCounts:74	950	-	11733301	11733443	0	2	50,50	0,92
chrIII	5735238	5735458	neuroPSI:1;readCounts:7	950	+	5735238	5735458	0	2	50,50	0,170
chrIII	5735492	5736057	neuroPSI:0.5;readCounts:8	950	+	5735492	5736057	0	2	50,50	0,515
chrIII	5735854	5736057	neuroPSI:0.5;readCounts:8	950	+	5735854	5736057	0	2	50,50	0,153
chrIII	5736088	5736233	neuroPSI:1;readCounts:35	950	+	5736088	5736233	0	2	50,50	0,95
chrIII	5736227	5736454	neuroPSI:1;readCounts:36	950	+	5736227	5736454	0	2	50,50	0,177
chrIII	5736573	5736845	neuroPSI:1;readCounts:40	950	+	5736573	5736845	0	2	50,50	0,222
chrIII	5736836	5737039	neuroPSI:1;readCounts:27	950	+	5736836	5737039	0	2	50,50	0,153
chrIII	5737015	5737256	neuroPSI:1;readCounts:28	950	+	5737015	5737256	0	2	50,50	0,191
chrIII	5744119	5744310	neuroPSI:1;readCounts:6	950	+	5744119	5744310	0	2	50,50	0,141
chrIII	5742546	5742733	neuroPSI:1;readCounts:8	950	+	5742546	5742733	0	2	50,50	0,137
chrIII	5734209	5734460	neuroPSI:1;readCounts:9	950	+	5734209	5734460	0	2	50,50	0,201
chrIII	5734452	5734627	neuroPSI:1;readCounts:9	950	+	5734452	5734627	0	2	50,50	0,125
chrIII	5734949	5735098	neuroPSI:1;readCounts:6	950	+	5734949	5735098	0	2	50,50	0,99
chrIII	5755614	5761454	neuroPSI:0.988;readCounts:1122	950	+	5755614	5761454	0	2	50,50	0,5790
chrIII	5758977	5761454	neuroPSI:0.012;readCounts:14	950	+	5758977	5761454	0	2	50,50	0,2427
chrIII	5761514	5761794	neuroPSI:1;readCounts:1015	950	+	5761514	5761794	0	2	50,50	0,230
chrIII	5761978	5762473	neuroPSI:0.997;readCounts:1784	950	+	5761978	5762473	0	2	50,50	0,445
chrIII	5761978	5762989	neuroPSI:0.002;readCounts:6	950	+	5761978	5762989	0	2	50,50	0,961
chrIII	5762842	5762989	neuroPSI:0.998;readCounts:3915	950	+	5762842	5762989	0	2	50,50	0,97
chrIII	5762993	5763168	neuroPSI:0.001;readCounts:5	950	+	5762993	5763168	0	2	50,50	0,125
chrIII	5762993	5763178	neuroPSI:0.999;readCounts:5678	950	+	5762993	5763178	0	2	50,50	0,135
chrIII	5763149	5763328	neuroPSI:1;readCounts:8166	950	+	5763149	5763328	0	2	50,50	0,129
chrIII	5763537	5764019	neuroPSI:1;readCounts:17662	950	+	5763537	5764019	0	2	50,50	0,432
chrIII	5764055	5764295	neuroPSI:1;readCounts:20152	950	+	5764055	5764295	0	2	50,50	0,190
chrIII	5764286	5764431	neuroPSI:1;readCounts:19529	950	+	5764286	5764431	0	2	50,50	0,95
chrIII	5764569	5764757	neuroPSI:1;readCounts:32566	950	+	5764569	5764757	0	2	50,50	0,138
chrIII	5764937	5765087	neuroPSI:0;readCounts:6	950	+	5764937	5765087	0	2	50,50	0,100
chrIII	5764937	5765543	neuroPSI:1;readCounts:33719	950	+	5764937	5765543	0	2	50,50	0,556
chrIII	5765034	5765543	neuroPSI:0;readCounts:12	950	+	5765034	5765543	0	2	50,50	0,459
chrIII	5747955	5749141	neuroPSI:0.562;readCounts:9	950	+	5747955	5749141	0	2	50,50	0,1136
chrIII	5747955	5749469	neuroPSI:0.438;readCounts:7	950	+	5747955	5749469	0	2	50,50	0,1464
chrIII	5749500	5749815	neuroPSI:1;readCounts:9	950	+	5749500	5749815	0	2	50,50	0,265
chrIII	5749809	5749960	neuroPSI:1;readCounts:22	950	+	5749809	5749960	0	2	50,50	0,101
chrIII	5749952	5750428	neuroPSI:1;readCounts:6	950	+	5749952	5750428	0	2	50,50	0,426
chrIII	5750461	5750846	neuroPSI:0.953;readCounts:123	950	+	5750461	5750846	0	2	50,50	0,335
chrIII	5750461	5751496	neuroPSI:0.047;readCounts:6	950	+	5750461	5751496	0	2	50,50	0,985
chrIII	5750834	5751496	neuroPSI:0.947;readCounts:107	950	+	5750834	5751496	0	2	50,50	0,612
chrIII	5751472	5751615	neuroPSI:1;readCounts:104	950	+	5751472	5751615	0	2	50,50	0,93
chrIII	5745272	5745462	neuroPSI:1;readCounts:6	950	+	5745272	5745462	0	2	50,50	0,140
chrIII	5745811	5745954	neuroPSI:1;readCounts:16	950	+	5745811	5745954	0	2	50,50	0,93
chrIII	5745948	5746096	neuroPSI:1;readCounts:22	950	+	5745948	5746096	0	2	50,50	0,98
chrIII	5746088	5746270	neuroPSI:1;readCounts:21	950	+	5746088	5746270	0	2	50,50	0,132
chrIII	5746303	5746567	neuroPSI:1;readCounts:26	950	+	5746303	5746567	0	2	50,50	0,214
chrIII	5746555	5746894	neuroPSI:1;readCounts:26	950	+	5746555	5746894	0	2	50,50	0,289
chrIII	5746870	5747015	neuroPSI:1;readCounts:34	950	+	5746870	5747015	0	2	50,50	0,95
chrIII	5738071	5738513	neuroPSI:1;readCounts:7	950	+	5738071	5738513	0	2	50,50	0,392
chrIII	5738720	5739244	neuroPSI:1;readCounts:36	950	+	5738720	5739244	0	2	50,50	0,474
chrIII	5739275	5739424	neuroPSI:1;readCounts:18	950	+	5739275	5739424	0	2	50,50	0,99
chrIII	5739421	5739566	neuroPSI:1;readCounts:20	950	+	5739421	5739566	0	2	50,50	0,95
chrIII	5739558	5739776	neuroPSI:1;readCounts:27	950	+	5739558	5739776	0	2	50,50	0,168
chrIII	5739803	5740212	neuroPSI:1;readCounts:57	950	+	5739803	5740212	0	2	50,50	0,359
chrIII	5740276	5740428	neuroPSI:1;readCounts:46	950	+	5740276	5740428	0	2	50,50	0,102
chrIII	5728185	5728331	neuroPSI:1;readCounts:371	950	+	5728185	5728331	0	2	50,50	0,96
chrIII	5728313	5728457	neuroPSI:1;readCounts:428	950	+	5728313	5728457	0	2	50,50	0,94
chrIII	5728999	5729143	neuroPSI:1;readCounts:935	950	+	5728999	5729143	0	2	50,50	0,94
chrIII	5729755	5729906	neuroPSI:1;readCounts:2088	950	+	5729755	5729906	0	2	50,50	0,101
chrIII	5730331	5730478	neuroPSI:1;readCounts:230	950	-	5730331	5730478	0	2	50,50	0,97
chrIII	5730468	5730610	neuroPSI:1;readCounts:273	950	-	5730468	5730610	0	2	50,50	0,92
chrIII	5730696	5730988	neuroPSI:1;readCounts:143	950	-	5730696	5730988	0	2	50,50	0,242
chrV	20479924	20480250	neuroPSI:1;readCounts:91196	950	+	20479924	20480250	0	2	50,50	0,276
chrV	20480261	20480417	neuroPSI:1;readCounts:112271	950	+	20480261	20480417	0	2	50,50	0,106
chrV	20480261	20480450	neuroPSI:0;readCounts:28	950	+	20480261	20480450	0	2	50,50	0,139
chrV	20480331	20480540	neuroPSI:1;readCounts:7	950	+	20480331	20480540	0	2	50,50	0,159
chrV	20480394	20480543	neuroPSI:1;readCounts:58	950	+	20480394	20480543	0	2	50,50	0,99
chrV	20480406	20480625	neuroPSI:1;readCounts:34	950	+	20480406	20480625	0	2	50,50	0,169
chrV	20466522	20466842	neuroPSI:0.636;readCounts:14	950	+	20466522	20466842	0	2	50,50	0,270
chrV	20466522	20467577	neuroPSI:0.008;readCounts:8	950	+	20466522	20467577	0	2	50,50	0,1005
chrV	20466764	20467577	neuroPSI:0.011;readCounts:11	950	+	20466764	20467577	0	2	50,50	0,763
chrV	20466811	20467577	neuroPSI:0.018;readCounts:18	950	+	20466811	20467577	0	2	50,50	0,716
chrV	20466833	20467577	neuroPSI:0.86;readCounts:837	950	+	20466833	20467577	0	2	50,50	0,694
chrV	20466837	20467577	neuroPSI:0.102;readCounts:99	950	+	20466837	20467577	0	2	50,50	0,690
chrV	20467864	20468011	neuroPSI:1;readCounts:1332	950	+	20467864	20468011	0	2	50,50	0,97
chrV	20456919	20457259	neuroPSI:1;readCounts:13	950	-	20456919	20457259	0	2	50,50	0,290
chrV	20476973	20477352	neuroPSI:1;readCounts:6025	950	-	20476973	20477352	0	2	50,50	0,329
chrV	20477327	20477479	neuroPSI:1;readCounts:4993	950	-	20477327	20477479	0	2	50,50	0,102
chrV	20477476	20478671	neuroPSI:0.004;readCounts:11	950	-	20477476	20478671	0	2	50,50	0,1145
chrV	20477476	20478699	neuroPSI:0.993;readCounts:2604	950	-	20477476	20478699	0	2	50,50	0,1173
chrV	20477476	20478742	neuroPSI:0.003;readCounts:7	950	-	20477476	20478742	0	2	50,50	0,1216
chrV	20478720	20478867	neuroPSI:1;readCounts:2257	950	-	20478720	20478867	0	2	50,50	0,97
chrV	20468690	20468847	neuroPSI:1;readCounts:806	950	-	20468690	20468847	0	2	50,50	0,107
chrV	20468858	20469184	neuroPSI:1;readCounts:402	950	-	20468858	20469184	0	2	50,50	0,276
chrV	20458667	20459225	neuroPSI:1;readCounts:208	950	-	20458667	20459225	0	2	50,50	0,508
chrV	20459290	20460111	neuroPSI:1;readCounts:211	950	-	20459290	20460111	0	2	50,50	0,771
chrV	20460116	20460264	neuroPSI:1;readCounts:198	950	-	20460116	20460264	0	2	50,50	0,98
chrV	20460282	20460995	neuroPSI:0.03;readCounts:5	950	-	20460282	20460995	0	2	50,50	0,663
chrV	20460305	20460995	neuroPSI:0.97;readCounts:159	950	-	20460305	20460995	0	2	50,50	0,640
chrV	20461066	20461280	neuroPSI:1;readCounts:102	950	-	20461066	20461280	0	2	50,50	0,164
chrV	20461282	20461789	neuroPSI:1;readCounts:61	950	-	20461282	20461789	0	2	50,50	0,457
chrV	20461769	20461919	neuroPSI:1;readCounts:63	950	-	20461769	20461919	0	2	50,50	0,100
chrV	20461874	20462730	neuroPSI:1;readCounts:46	950	-	20461874	20462730	0	2	50,50	0,806
chrV	20462780	20462951	neuroPSI:1;readCounts:44	950	-	20462780	20462951	0	2	50,50	0,121
chrV	20462953	20463145	neuroPSI:1;readCounts:27	950	-	20462953	20463145	0	2	50,50	0,142
chrV	20463186	20463500	neuroPSI:1;readCounts:44	950	-	20463186	20463500	0	2	50,50	0,264
chrV	20463513	20464375	neuroPSI:1;readCounts:27	950	-	20463513	20464375	0	2	50,50	0,812
chrV	20464322	20464467	neuroPSI:1;readCounts:33	950	-	20464322	20464467	0	2	50,50	0,95
chrV	20494003	20494155	neuroPSI:1;readCounts:746	950	+	20494003	20494155	0	2	50,50	0,102
chrV	20494180	20494386	neuroPSI:1;readCounts:1201	950	+	20494180	20494386	0	2	50,50	0,156
chrV	20494417	20495190	neuroPSI:1;readCounts:1707	950	+	20494417	20495190	0	2	50,50	0,723
chrV	20495295	20496360	neuroPSI:1;readCounts:2382	950	+	20495295	20496360	0	2	50,50	0,1015
chrV	20496378	20497023	neuroPSI:1;readCounts:3606	950	+	20496378	20497023	0	2	50,50	0,595
chrV	20473071	20473221	neuroPSI:1;readCounts:83	950	-	20473071	20473221	0	2	50,50	0,100
chrV	20473202	20473848	neuroPSI:1;readCounts:98	950	-	20473202	20473848	0	2	50,50	0,596
chrV	20473881	20474789	neuroPSI:1;readCounts:56	950	-	20473881	20474789	0	2	50,50	0,858
chrV	20475050	20475197	neuroPSI:0.469;readCounts:23	950	-	20475050	20475197	0	2	50,50	0,97
chrV	20475056	20475197	neuroPSI:0.531;readCounts:26	950	-	20475056	20475197	0	2	50,50	0,91
chrV	20475371	20475633	neuroPSI:1;readCounts:16	950	-	20475371	20475633	0	2	50,50	0,212
chrV	20475744	20475931	neuroPSI:1;readCounts:19	950	-	20475744	20475931	0	2	50,50	0,137
chrV	20470207	20470352	neuroPSI:1;readCounts:10	950	-	20470207	20470352	0	2	50,50	0,95
chrV	20481088	20481243	neuroPSI:1;readCounts:493	950	-	20481088	20481243	0	2	50,50	0,105
chrV	20481527	20481905	neuroPSI:1;readCounts:159	950	-	20481527	20481905	0	2	50,50	0,328
chrV	20481967	20483341	neuroPSI:1;readCounts:109	950	-	20481967	20483341	0	2	50,50	0,1324
chrV	20483442	20484055	neuroPSI:1;readCounts:96	950	-	20483442	20484055	0	2	50,50	0,563
chrV	20484115	20484981	neuroPSI:1;readCounts:46	950	-	20484115	20484981	0	2	50,50	0,816
chrV	20484992	20485308	neuroPSI:1;readCounts:43	950	-	20484992	20485308	0	2	50,50	0,266
chrII	6920019	6920364	neuroPSI:1;readCounts:6	950	+	6920019	6920364	0	2	50,50	0,295
chrII	6920387	6920528	neuroPSI:1;readCounts:5	950	+	6920387	6920528	0	2	50,50	0,91
chrII	6920539	6920687	neuroPSI:1;readCounts:10	950	+	6920539	6920687	0	2	50,50	0,98
chrII	6920729	6920881	neuroPSI:1;readCounts:8	950	+	6920729	6920881	0	2	50,50	0,102
chrII	6920954	6921229	neuroPSI:1;readCounts:12	950	+	6920954	6921229	0	2	50,50	0,225
chrII	6921220	6921372	neuroPSI:1;readCounts:8	950	+	6921220	6921372	0	2	50,50	0,102
chrII	6921652	6922061	neuroPSI:1;readCounts:20	950	+	6921652	6922061	0	2	50,50	0,359
chrII	6922157	6922302	neuroPSI:1;readCounts:30	950	+	6922157	6922302	0	2	50,50	0,95
chrII	6922404	6922635	neuroPSI:1;readCounts:75	950	+	6922404	6922635	0	2	50,50	0,181
chrII	6922723	6922997	neuroPSI:1;readCounts:59	950	+	6922723	6922997	0	2	50,50	0,224
chrII	6923347	6923493	neuroPSI:1;readCounts:140	950	+	6923347	6923493	0	2	50,50	0,96
chrII	6910399	6910685	neuroPSI:1;readCounts:7	950	+	6910399	6910685	0	2	50,50	0,236
chrII	6911141	6911286	neuroPSI:1;readCounts:18	950	+	6911141	6911286	0	2	50,50	0,95
chrII	6911313	6911649	neuroPSI:1;readCounts:27	950	+	6911313	6911649	0	2	50,50	0,286
chrII	6911630	6911781	neuroPSI:1;readCounts:42	950	+	6911630	6911781	0	2	50,50	0,101
chrII	6911852	6912000	neuroPSI:1;readCounts:88	950	+	6911852	6912000	0	2	50,50	0,98
chrII	6912003	6912149	neuroPSI:1;readCounts:88	950	+	6912003	6912149	0	2	50,50	0,96
chrII	6912136	6912282	neuroPSI:1;readCounts:91	950	+	6912136	6912282	0	2	50,50	0,96
chrII	6912367	6912514	neuroPSI:1;readCounts:132	950	+	6912367	6912514	0	2	50,50	0,97
chrII	6903137	6903292	neuroPSI:1;readCounts:231	950	-	6903137	6903292	0	2	50,50	0,105
chrII	6903285	6903898	neuroPSI:1;readCounts:222	950	-	6903285	6903898	0	2	50,50	0,563
chrII	6904093	6904253	neuroPSI:1;readCounts:156	950	-	6904093	6904253	0	2	50,50	0,110
chrII	6904369	6904530	neuroPSI:1;readCounts:81	950	-	6904369	6904530	0	2	50,50	0,111
chrII	6904630	6905020	neuroPSI:1;readCounts:35	950	-	6904630	6905020	0	2	50,50	0,340
chrII	6905288	6907267	neuroPSI:1;readCounts:43	950	-	6905288	6907267	0	2	50,50	0,1929
chrII	6907240	6907411	neuroPSI:1;readCounts:5	950	-	6907240	6907411	0	2	50,50	0,121
chrII	6912662	6912818	neuroPSI:0.013;readCounts:23	950	-	6912662	6912818	0	2	50,50	0,106
chrII	6912669	6912818	neuroPSI:0.987;readCounts:1706	950	-	6912669	6912818	0	2	50,50	0,99
chrII	6912799	6912947	neuroPSI:1;readCounts:2403	950	-	6912799	6912947	0	2	50,50	0,98
chrII	6912966	6913115	neuroPSI:0.997;readCounts:2250	950	-	6912966	6913115	0	2	50,50	0,99
chrII	6912966	6913130	neuroPSI:0.003;readCounts:6	950	-	6912966	6913130	0	2	50,50	0,114
chrII	6913177	6913334	neuroPSI:1;readCounts:1073	950	-	6913177	6913334	0	2	50,50	0,107
chrII	6917096	6917257	neuroPSI:1;readCounts:517	950	-	6917096	6917257	0	2	50,50	0,111
chrII	6917220	6917779	neuroPSI:1;readCounts:371	950	-	6917220	6917779	0	2	50,50	0,509
chrII	6917946	6918119	neuroPSI:1;readCounts:684	950	-	6917946	6918119	0	2	50,50	0,123
chrII	6918256	6918407	neuroPSI:1;readCounts:689	950	-	6918256	6918407	0	2	50,50	0,101
chrII	6918475	6918623	neuroPSI:1;readCounts:873	950	-	6918475	6918623	0	2	50,50	0,98
chrII	6918663	6918809	neuroPSI:1;readCounts:538	950	-	6918663	6918809	0	2	50,50	0,96
chrII	6916293	6916897	neuroPSI:1;readCounts:61117	950	+	6916293	6916897	0	2	50,50	0,554
chrI	5263953	5264111	neuroPSI:1;readCounts:163	950	+	5263953	5264111	0	2	50,50	0,108
chrI	5264435	5264867	neuroPSI:1;readCounts:195	950	+	5264435	5264867	0	2	50,50	0,382
chrI	5264864	5265011	neuroPSI:1;readCounts:180	950	+	5264864	5265011	0	2	50,50	0,97
chrI	5265036	5265200	neuroPSI:1;readCounts:350	950	+	5265036	5265200	0	2	50,50	0,114
chrI	5265520	5266330	neuroPSI:1;readCounts:747	950	+	5265520	5266330	0	2	50,50	0,760
chrI	5266618	5266763	neuroPSI:1;readCounts:1381	950	+	5266618	5266763	0	2	50,50	0,95
chrI	5266759	5267369	neuroPSI:1;readCounts:1592	950	+	5266759	5267369	0	2	50,50	0,560
chrI	5267605	5268008	neuroPSI:1;readCounts:2201	950	+	5267605	5268008	0	2	50,50	0,353
chrI	5245853	5246008	neuroPSI:1;readCounts:5	950	+	5245853	5246008	0	2	50,50	0,105
chrI	5246009	5246162	neuroPSI:1;readCounts:8	950	+	5246009	5246162	0	2	50,50	0,103
chrI	5246731	5246880	neuroPSI:1;readCounts:9	950	+	5246731	5246880	0	2	50,50	0,99
chrI	5246992	5247136	neuroPSI:1;readCounts:10	950	+	5246992	5247136	0	2	50,50	0,94
chrI	5247097	5247247	neuroPSI:1;readCounts:13	950	+	5247097	5247247	0	2	50,50	0,100
chrI	5247320	5247559	neuroPSI:1;readCounts:9	950	+	5247320	5247559	0	2	50,50	0,189
chrI	5247573	5247719	neuroPSI:1;readCounts:9	950	+	5247573	5247719	0	2	50,50	0,96
chrI	5247917	5248624	neuroPSI:1;readCounts:26	950	+	5247917	5248624	0	2	50,50	0,657
chrI	5248638	5248787	neuroPSI:1;readCounts:28	950	+	5248638	5248787	0	2	50,50	0,99
chrI	5248865	5249401	neuroPSI:1;readCounts:15	950	+	5248865	5249401	0	2	50,50	0,486
chrI	5249672	5250904	neuroPSI:1;readCounts:5	950	+	5249672	5250904	0	2	50,50	0,1182
chrI	5250948	5251099	neuroPSI:1;readCounts:6	950	+	5250948	5251099	0	2	50,50	0,101
chrI	5251614	5252197	neuroPSI:1;readCounts:11	950	+	5251614	5252197	0	2	50,50	0,533
chrI	5252265	5252413	neuroPSI:1;readCounts:9	950	+	5252265	5252413	0	2	50,50	0,98
chrI	5252899	5253250	neuroPSI:1;readCounts:8	950	+	5252899	5253250	0	2	50,50	0,301
chrI	5253329	5253476	neuroPSI:1;readCounts:12	950	+	5253329	5253476	0	2	50,50	0,97
chrI	5253774	5254212	neuroPSI:1;readCounts:30	950	+	5253774	5254212	0	2	50,50	0,388
chrI	5254528	5255190	neuroPSI:1;readCounts:57	950	+	5254528	5255190	0	2	50,50	0,612
chrI	5255181	5255327	neuroPSI:1;readCounts:40	950	+	5255181	5255327	0	2	50,50	0,96
chrI	5255384	5257137	neuroPSI:1;readCounts:64	950	+	5255384	5257137	0	2	50,50	0,1703
chrI	5257538	5258404	neuroPSI:1;readCounts:54	950	+	5257538	5258404	0	2	50,50	0,816
chrI	5258510	5258657	neuroPSI:1;readCounts:84	950	+	5258510	5258657	0	2	50,50	0,97
chrI	5258700	5259345	neuroPSI:0.05;readCounts:5	950	+	5258700	5259345	0	2	50,50	0,595
chrI	5258700	5259354	neuroPSI:0.95;readCounts:95	950	+	5258700	5259354	0	2	50,50	0,604
chrI	5259808	5260333	neuroPSI:1;readCounts:205	950	+	5259808	5260333	0	2	50,50	0,475
chrI	5260329	5260473	neuroPSI:0.06;readCounts:18	950	+	5260329	5260473	0	2	50,50	0,94
chrI	5260329	5260485	neuroPSI:0.94;readCounts:280	950	+	5260329	5260485	0	2	50,50	0,106
chrI	5260586	5260735	neuroPSI:1;readCounts:510	950	+	5260586	5260735	0	2	50,50	0,99
chrI	5260800	5261131	neuroPSI:1;readCounts:463	950	+	5260800	5261131	0	2	50,50	0,281
chrI	5261567	5262238	neuroPSI:0.978;readCounts:1043	950	+	5261567	5262238	0	2	50,50	0,621
chrI	5261827	5262238	neuroPSI:0.022;readCounts:23	950	+	5261827	5262238	0	2	50,50	0,361
chrI	5262277	5262431	neuroPSI:1;readCounts:1389	950	+	5262277	5262431	0	2	50,50	0,104
chrI	5262599	5262900	neuroPSI:1;readCounts:2750	950	+	5262599	5262900	0	2	50,50	0,251
chrI	5244437	5244591	neuroPSI:1;readCounts:1782	950	+	5244437	5244591	0	2	50,50	0,104
chrI	5244656	5244806	neuroPSI:1;readCounts:1707	950	+	5244656	5244806	0	2	50,50	0,100
chrI	5244812	5244955	neuroPSI:1;readCounts:1903	950	+	5244812	5244955	0	2	50,50	0,93
chrI	5244977	5245125	neuroPSI:1;readCounts:2548	950	+	5244977	5245125	0	2	50,50	0,98
chrI	5249841	5250001	neuroPSI:1;readCounts:73	950	-	5249841	5250001	0	2	50,50	0,110
chrI	5250387	5250532	neuroPSI:1;readCounts:56	950	-	5250387	5250532	0	2	50,50	0,95
chrI	5255732	5256472	neuroPSI:1;readCounts:1785	950	-	5255732	5256472	0	2	50,50	0,690
chrI	5256484	5256872	neuroPSI:0.015;readCounts:28	950	-	5256484	5256872	0	2	50,50	0,338
chrI	5256527	5256872	neuroPSI:0.048;readCounts:89	950	-	5256527	5256872	0	2	50,50	0,295
chrI	5256530	5256872	neuroPSI:0.937;readCounts:1753	950	-	5256530	5256872	0	2	50,50	0,292
chrI	5269606	5269753	neuroPSI:1;readCounts:1781	950	-	5269606	5269753	0	2	50,50	0,97
chrI	5269850	5269998	neuroPSI:0.002;readCounts:5	950	-	5269850	5269998	0	2	50,50	0,98
chrI	5269850	5270002	neuroPSI:0.998;readCounts:2077	950	-	5269850	5270002	0	2	50,50	0,102
chrI	5270118	5270259	neuroPSI:1;readCounts:1729	950	-	5270118	5270259	0	2	50,50	0,91
chrI	5270306	5270452	neuroPSI:1;readCounts:1873	950	-	5270306	5270452	0	2	50,50	0,96
chrI	5270475	5270621	neuroPSI:1;readCounts:1377	950	-	5270475	5270621	0	2	50,50	0,96
chrI	5271471	5271623	neuroPSI:0.004;readCounts:17	950	-	5271471	5271623	0	2	50,50	0,102
chrI	5271471	5271627	neuroPSI:0.996;readCounts:4523	950	-	5271471	5271627	0	2	50,50	0,106
chrI	5271869	5272026	neuroPSI:1;readCounts:2921	950	-	5271869	5272026	0	2	50,50	0,107
chrI	5269219	5269366	neuroPSI:1;readCounts:14	950	+	5269219	5269366	0	2	50,50	0,97
chrX	9434702	9434859	neuroPSI:1;readCounts:12	950	-	9434702	9434859	0	2	50,50	0,107
chrX	9434804	9434981	neuroPSI:1;readCounts:12530	950	-	9434804	9434981	0	2	50,50	0,127
chrX	9435195	9435345	neuroPSI:1;readCounts:5034	950	-	9435195	9435345	0	2	50,50	0,100
chrX	9435345	9435502	neuroPSI:0.01;readCounts:38	950	-	9435345	9435502	0	2	50,50	0,107
chrX	9435355	9435502	neuroPSI:0.99;readCounts:3877	950	-	9435355	9435502	0	2	50,50	0,97
chrX	9435744	9436327	neuroPSI:1;readCounts:2049	950	-	9435744	9436327	0	2	50,50	0,533
chrX	9436454	9436729	neuroPSI:1;readCounts:1289	950	-	9436454	9436729	0	2	50,50	0,225
chrX	9436738	9436884	neuroPSI:1;readCounts:1047	950	-	9436738	9436884	0	2	50,50	0,96
chrX	9440476	9440620	neuroPSI:1;readCounts:610	950	-	9440476	9440620	0	2	50,50	0,94
chrX	9440625	9440822	neuroPSI:1;readCounts:539	950	-	9440625	9440822	0	2	50,50	0,147
chrX	9440804	9441189	neuroPSI:1;readCounts:507	950	-	9440804	9441189	0	2	50,50	0,335
chrX	9441217	9441369	neuroPSI:1;readCounts:220	950	-	9441217	9441369	0	2	50,50	0,102
chrX	9441339	9441486	neuroPSI:1;readCounts:181	950	-	9441339	9441486	0	2	50,50	0,97
chrX	9431628	9431781	neuroPSI:1;readCounts:531	950	+	9431628	9431781	0	2	50,50	0,103
chrX	9431839	9432082	neuroPSI:1;readCounts:1055	950	+	9431839	9432082	0	2	50,50	0,193
chrX	9432199	9432365	neuroPSI:1;readCounts:1593	950	+	9432199	9432365	0	2	50,50	0,116
chrX	9428556	9428702	neuroPSI:1;readCounts:268	950	+	9428556	9428702	0	2	50,50	0,96
chrX	9428663	9428812	neuroPSI:1;readCounts:379	950	+	9428663	9428812	0	2	50,50	0,99
chrX	9428857	9429276	neuroPSI:1;readCounts:481	950	+	9428857	9429276	0	2	50,50	0,369
chrX	9429338	9430002	neuroPSI:1;readCounts:436	950	+	9429338	9430002	0	2	50,50	0,614
chrX	9429974	9430121	neuroPSI:1;readCounts:448	950	+	9429974	9430121	0	2	50,50	0,97
chrIV	5493988	5494280	neuroPSI:1;readCounts:164	950	+	5493988	5494280	0	2	50,50	0,242
chrIV	5494540	5494815	neuroPSI:1;readCounts:361	950	+	5494540	5494815	0	2	50,50	0,225
chrIV	5494818	5494995	neuroPSI:1;readCounts:374	950	+	5494818	5494995	0	2	50,50	0,127
chrIV	5495010	5495157	neuroPSI:1;readCounts:321	950	+	5495010	5495157	0	2	50,50	0,97
chrIV	5490677	5490887	neuroPSI:1;readCounts:90	950	-	5490677	5490887	0	2	50,50	0,160
chrIV	5490915	5491095	neuroPSI:1;readCounts:94	950	-	5490915	5491095	0	2	50,50	0,130
chrIV	5486802	5486972	neuroPSI:1;readCounts:123	950	+	5486802	5486972	0	2	50,50	0,120
chrIV	5487331	5488096	neuroPSI:1;readCounts:163	950	+	5487331	5488096	0	2	50,50	0,715
chrIV	5488649	5489781	neuroPSI:1;readCounts:1150	950	+	5488649	5489781	0	2	50,50	0,1082
chrIV	5484323	5484565	neuroPSI:1;readCounts:108	950	-	5484323	5484565	0	2	50,50	0,192
chrIV	5484561	5484909	neuroPSI:1;readCounts:54	950	-	5484561	5484909	0	2	50,50	0,298
chrIV	5484977	5485324	neuroPSI:1;readCounts:192	950	-	5484977	5485324	0	2	50,50	0,297
chrIV	5485854	5486007	neuroPSI:1;readCounts:47	950	-	5485854	5486007	0	2	50,50	0,103
chrIV	5486042	5486195	neuroPSI:1;readCounts:52	950	-	5486042	5486195	0	2	50,50	0,103
chrIV	5496064	5496680	neuroPSI:1;readCounts:1683	950	-	5496064	5496680	0	2	50,50	0,566
chrIV	5497497	5498046	neuroPSI:1;readCounts:482	950	-	5497497	5498046	0	2	50,50	0,499
chrIV	5498635	5499189	neuroPSI:1;readCounts:151	950	-	5498635	5499189	0	2	50,50	0,504
chrIV	5499456	5501412	neuroPSI:1;readCounts:110	950	-	5499456	5501412	0	2	50,50	0,1906
chrIV	5501487	5501886	neuroPSI:1;readCounts:126	950	-	5501487	5501886	0	2	50,50	0,349
chrIV	5501890	5508752	neuroPSI:1;readCounts:47	950	-	5501890	5508752	0	2	50,50	0,6812
chrIV	5508851	5516190	neuroPSI:0.818;readCounts:27	950	-	5508851	5516190	0	2	50,50	0,7289
chrIV	5514978	5516190	neuroPSI:0.182;readCounts:6	950	-	5514978	5516190	0	2	50,50	0,1162
chrIV	5516215	5528306	neuroPSI:1;readCounts:11	950	-	5516215	5528306	0	2	50,50	0,12041
chrIII	7133835	7133982	neuroPSI:1;readCounts:433	950	+	7133835	7133982	0	2	50,50	0,97
chrIII	7134008	7134162	neuroPSI:1;readCounts:636	950	+	7134008	7134162	0	2	50,50	0,104
chrIII	7134137	7134292	neuroPSI:1;readCounts:931	950	+	7134137	7134292	0	2	50,50	0,105
chrIII	7134336	7134640	neuroPSI:1;readCounts:9	950	+	7134336	7134640	0	2	50,50	0,254
chrIII	7134421	7134573	neuroPSI:1;readCounts:1589	950	+	7134421	7134573	0	2	50,50	0,102
chrIII	7134749	7134894	neuroPSI:1;readCounts:2553	950	+	7134749	7134894	0	2	50,50	0,95
chrIII	7134958	7135234	neuroPSI:0.009;readCounts:18	950	+	7134958	7135234	0	2	50,50	0,226
chrIII	7134958	7136008	neuroPSI:0.068;readCounts:138	950	+	7134958	7136008	0	2	50,50	0,1000
chrIII	7134958	7136079	neuroPSI:0.072;readCounts:146	950	+	7134958	7136079	0	2	50,50	0,1071
chrIII	7134958	7136323	neuroPSI:0.83;readCounts:1734	950	+	7134958	7136323	0	2	50,50	0,1315
chrIII	7136068	7136323	neuroPSI:0.17;readCounts:356	950	+	7136068	7136323	0	2	50,50	0,205
chrIII	7132076	7132266	neuroPSI:1;readCounts:5	950	-	7132076	7132266	0	2	50,50	0,140
chrIII	7132204	7132356	neuroPSI:1;readCounts:361	950	-	7132204	7132356	0	2	50,50	0,102
chrIII	7132349	7132498	neuroPSI:1;readCounts:480	950	-	7132349	7132498	0	2	50,50	0,99
chrIII	7132487	7132641	neuroPSI:1;readCounts:434	950	-	7132487	7132641	0	2	50,50	0,104
chrIII	7132690	7132911	neuroPSI:0.09;readCounts:30	950	-	7132690	7132911	0	2	50,50	0,171
chrIII	7132690	7132935	neuroPSI:0.91;readCounts:303	950	-	7132690	7132935	0	2	50,50	0,195
chrIII	7132978	7133122	neuroPSI:1;readCounts:421	950	-	7132978	7133122	0	2	50,50	0,94
chrIII	7133103	7133260	neuroPSI:1;readCounts:403	950	-	7133103	7133260	0	2	50,50	0,107
chrIII	7133258	7133404	neuroPSI:1;readCounts:362	950	-	7133258	7133404	0	2	50,50	0,96
chrIII	7133389	7133598	neuroPSI:0.06;readCounts:15	950	-	7133389	7133598	0	2	50,50	0,159
chrIII	7133452	7133598	neuroPSI:0.94;readCounts:235	950	-	7133452	7133598	0	2	50,50	0,96
chrIII	7136707	7136849	neuroPSI:1;readCounts:217	950	-	7136707	7136849	0	2	50,50	0,92
chrIII	7136866	7137014	neuroPSI:1;readCounts:276	950	-	7136866	7137014	0	2	50,50	0,98
chrIII	7137304	7137523	neuroPSI:1;readCounts:186	950	-	7137304	7137523	0	2	50,50	0,169
chrIII	7137750	7137975	neuroPSI:1;readCounts:77	950	-	7137750	7137975	0	2	50,50	0,175
chrIII	7138067	7138212	neuroPSI:1;readCounts:42	950	-	7138067	7138212	0	2	50,50	0,95
chrIII	7139014	7139206	neuroPSI:1;readCounts:1448	950	-	7139014	7139206	0	2	50,50	0,142
chrIII	7139307	7139801	neuroPSI:0.987;readCounts:882	950	-	7139307	7139801	0	2	50,50	0,444
chrIII	7139307	7139854	neuroPSI:0.013;readCounts:12	950	-	7139307	7139854	0	2	50,50	0,497
chrIII	7139796	7139943	neuroPSI:1;readCounts:804	950	-	7139796	7139943	0	2	50,50	0,97
chrIII	7139944	7140088	neuroPSI:1;readCounts:630	950	-	7139944	7140088	0	2	50,50	0,94
chrIII	7140086	7140232	neuroPSI:1;readCounts:523	950	-	7140086	7140232	0	2	50,50	0,96
chrIII	7140293	7140860	neuroPSI:1;readCounts:273	950	-	7140293	7140860	0	2	50,50	0,517
chrIII	7140955	7141119	neuroPSI:1;readCounts:214	950	-	7140955	7141119	0	2	50,50	0,114
chrIII	7141170	7141565	neuroPSI:1;readCounts:214	950	-	7141170	7141565	0	2	50,50	0,345
chrIII	7141674	7141817	neuroPSI:1;readCounts:139	950	-	7141674	7141817	0	2	50,50	0,93
chrIII	7141985	7142652	neuroPSI:1;readCounts:85	950	-	7141985	7142652	0	2	50,50	0,617
chrIII	7142708	7142851	neuroPSI:0.804;readCounts:45	950	-	7142708	7142851	0	2	50,50	0,93
chrIII	7142708	7142987	neuroPSI:0.089;readCounts:5	950	-	7142708	7142987	0	2	50,50	0,229
chrIII	7142708	7143281	neuroPSI:0.107;readCounts:6	950	-	7142708	7143281	0	2	50,50	0,523
chrIII	7142843	7142987	neuroPSI:0.898;readCounts:44	950	-	7142843	7142987	0	2	50,50	0,94
chrIII	7143002	7143281	neuroPSI:0.885;readCounts:46	950	-	7143002	7143281	0	2	50,50	0,229
chrIII	7143294	7143443	neuroPSI:1;readCounts:49	950	-	7143294	7143443	0	2	50,50	0,99
chrIII	7143423	7143566	neuroPSI:1;readCounts:32	950	-	7143423	7143566	0	2	50,50	0,93
chrIII	7143632	7143946	neuroPSI:1;readCounts:12	950	-	7143632	7143946	0	2	50,50	0,264
chrIII	7143941	7144091	neuroPSI:1;readCounts:18	950	-	7143941	7144091	0	2	50,50	0,100
chrIII	7144115	7144307	neuroPSI:1;readCounts:17	950	-	7144115	7144307	0	2	50,50	0,142
chrIII	7144263	7144806	neuroPSI:1;readCounts:16	950	-	7144263	7144806	0	2	50,50	0,493
chrIII	7128938	7129082	neuroPSI:1;readCounts:15	950	+	7128938	7129082	0	2	50,50	0,94
chrIII	7129075	7129422	neuroPSI:1;readCounts:20	950	+	7129075	7129422	0	2	50,50	0,297
chrIII	7129414	7129559	neuroPSI:1;readCounts:16	950	+	7129414	7129559	0	2	50,50	0,95
chrIII	7129593	7130085	neuroPSI:1;readCounts:14	950	+	7129593	7130085	0	2	50,50	0,442
chrIII	7130191	7130338	neuroPSI:1;readCounts:56	950	+	7130191	7130338	0	2	50,50	0,97
chrIII	7130382	7130577	neuroPSI:1;readCounts:38	950	+	7130382	7130577	0	2	50,50	0,145
chrIII	7130871	7131298	neuroPSI:1;readCounts:69	950	+	7130871	7131298	0	2	50,50	0,377
chrIII	7131710	7131854	neuroPSI:1;readCounts:172	950	+	7131710	7131854	0	2	50,50	0,94
chrIII	7135266	7135412	neuroPSI:1;readCounts:1351	950	-	7135266	7135412	0	2	50,50	0,96
chrIII	7135410	7135558	neuroPSI:1;readCounts:1302	950	-	7135410	7135558	0	2	50,50	0,98
chrIII	7135784	7135936	neuroPSI:1;readCounts:754	950	-	7135784	7135936	0	2	50,50	0,102
chrIII	7135921	7136072	neuroPSI:1;readCounts:836	950	-	7135921	7136072	0	2	50,50	0,101
chrIII	7125390	7125883	neuroPSI:1;readCounts:10	950	+	7125390	7125883	0	2	50,50	0,443
chrIII	7125989	7126136	neuroPSI:1;readCounts:5	950	+	7125989	7126136	0	2	50,50	0,97
chrIII	7126478	7127183	neuroPSI:1;readCounts:13	950	+	7126478	7127183	0	2	50,50	0,655
chrIII	7127283	7127426	neuroPSI:1;readCounts:15	950	+	7127283	7127426	0	2	50,50	0,93
chrIII	7127484	7127723	neuroPSI:1;readCounts:25	950	+	7127484	7127723	0	2	50,50	0,189
chrIII	7127926	7128086	neuroPSI:1;readCounts:67	950	+	7127926	7128086	0	2	50,50	0,110
chrIII	7142262	7142707	neuroPSI:1;readCounts:17	950	+	7142262	7142707	0	2	50,50	0,395
chrIII	7123194	7123341	neuroPSI:1;readCounts:1703	950	+	7123194	7123341	0	2	50,50	0,97
chrIII	7123394	7123541	neuroPSI:1;readCounts:2089	950	+	7123394	7123541	0	2	50,50	0,97
chrIII	7123684	7123908	neuroPSI:1;readCounts:3687	950	+	7123684	7123908	0	2	50,50	0,174
chrIII	7123955	7124085	neuroPSI:1;readCounts:19	950	+	7123955	7124085	0	2	50,50	0,80
chrIII	7108588	7108948	neuroPSI:1;readCounts:32	950	+	7108588	7108948	0	2	50,50	0,310
chrIII	7102388	7102532	neuroPSI:1;readCounts:4814	950	-	7102388	7102532	0	2	50,50	0,94
chrIII	7102708	7102854	neuroPSI:1;readCounts:4316	950	-	7102708	7102854	0	2	50,50	0,96
chrIII	7103153	7103289	neuroPSI:0.912;readCounts:489	950	-	7103153	7103289	0	2	50,50	0,86
chrIII	7103153	7103635	neuroPSI:0.088;readCounts:47	950	-	7103153	7103635	0	2	50,50	0,432
chrIII	7103189	7103337	neuroPSI:0.93;readCounts:159	950	-	7103189	7103337	0	2	50,50	0,98
chrIII	7103189	7103635	neuroPSI:0.07;readCounts:12	950	-	7103189	7103635	0	2	50,50	0,396
chrIII	7103350	7103505	neuroPSI:1;readCounts:27	950	-	7103350	7103505	0	2	50,50	0,105
chrIII	7103441	7103584	neuroPSI:1;readCounts:2506	950	-	7103441	7103584	0	2	50,50	0,93
chrIII	7103826	7103969	neuroPSI:1;readCounts:2104	950	-	7103826	7103969	0	2	50,50	0,93
chrIII	7110570	7110765	neuroPSI:1;readCounts:186	950	-	7110570	7110765	0	2	50,50	0,145
chrIII	7110773	7110915	neuroPSI:1;readCounts:131	950	-	7110773	7110915	0	2	50,50	0,92
chrIII	7110938	7111087	neuroPSI:1;readCounts:119	950	-	7110938	7111087	0	2	50,50	0,99
chrIII	7111134	7111285	neuroPSI:1;readCounts:65	950	-	7111134	7111285	0	2	50,50	0,101
chrIII	7111428	7111710	neuroPSI:1;readCounts:29	950	-	7111428	7111710	0	2	50,50	0,232
chrIII	7112743	7112898	neuroPSI:1;readCounts:667	950	-	7112743	7112898	0	2	50,50	0,105
chrIII	7113169	7113624	neuroPSI:1;readCounts:292	950	-	7113169	7113624	0	2	50,50	0,405
chrIII	7113662	7113807	neuroPSI:1;readCounts:210	950	-	7113662	7113807	0	2	50,50	0,95
chrIII	7113881	7114464	neuroPSI:1;readCounts:146	950	-	7113881	7114464	0	2	50,50	0,533
chrIII	7114531	7114676	neuroPSI:1;readCounts:122	950	-	7114531	7114676	0	2	50,50	0,95
chrIII	7114656	7115371	neuroPSI:1;readCounts:66	950	-	7114656	7115371	0	2	50,50	0,665
chrIII	7121299	7121637	neuroPSI:1;readCounts:1480	950	-	7121299	7121637	0	2	50,50	0,288
chrIII	7121670	7121817	neuroPSI:1;readCounts:1151	950	-	7121670	7121817	0	2	50,50	0,97
chrIII	7121811	7121968	neuroPSI:1;readCounts:866	950	-	7121811	7121968	0	2	50,50	0,107
chrIII	7121969	7122120	neuroPSI:1;readCounts:799	950	-	7121969	7122120	0	2	50,50	0,101
chrIII	7122201	7122349	neuroPSI:1;readCounts:509	950	-	7122201	7122349	0	2	50,50	0,98
chrIII	7122458	7122604	neuroPSI:1;readCounts:426	950	-	7122458	7122604	0	2	50,50	0,96
chrIII	7122580	7122785	neuroPSI:1;readCounts:487	950	-	7122580	7122785	0	2	50,50	0,155
chrII	2307104	2307247	neuroPSI:1;readCounts:69	950	+	2307104	2307247	0	2	50,50	0,93
chrII	2307236	2307459	neuroPSI:0.138;readCounts:12	950	+	2307236	2307459	0	2	50,50	0,173
chrII	2307311	2307459	neuroPSI:0.862;readCounts:75	950	+	2307311	2307459	0	2	50,50	0,98
chrII	2307428	2307580	neuroPSI:1;readCounts:142	950	+	2307428	2307580	0	2	50,50	0,102
chrII	2307723	2307872	neuroPSI:1;readCounts:177	950	+	2307723	2307872	0	2	50,50	0,99
chrII	2308103	2308255	neuroPSI:1;readCounts:310	950	+	2308103	2308255	0	2	50,50	0,102
chrII	2298033	2298179	neuroPSI:1;readCounts:24	950	-	2298033	2298179	0	2	50,50	0,96
chrII	2298197	2298383	neuroPSI:1;readCounts:14	950	-	2298197	2298383	0	2	50,50	0,136
chrII	2298534	2298753	neuroPSI:1;readCounts:15	950	-	2298534	2298753	0	2	50,50	0,169
chrII	2300037	2300288	neuroPSI:1;readCounts:14	950	-	2300037	2300288	0	2	50,50	0,201
chrII	2300306	2300458	neuroPSI:1;readCounts:7	950	-	2300306	2300458	0	2	50,50	0,102
chrII	2300604	2300754	neuroPSI:1;readCounts:18	950	-	2300604	2300754	0	2	50,50	0,100
chrII	2301511	2301699	neuroPSI:1;readCounts:194	950	-	2301511	2301699	0	2	50,50	0,138
chrII	2301714	2301863	neuroPSI:1;readCounts:159	950	-	2301714	2301863	0	2	50,50	0,99
chrII	2302006	2302159	neuroPSI:1;readCounts:74	950	-	2302006	2302159	0	2	50,50	0,103
chrIII	4377135	4377279	neuroPSI:1;readCounts:10	950	+	4377135	4377279	0	2	50,50	0,94
chrIII	4377434	4377983	neuroPSI:1;readCounts:13	950	+	4377434	4377983	0	2	50,50	0,499
chrIII	4378264	4378430	neuroPSI:1;readCounts:23	950	+	4378264	4378430	0	2	50,50	0,116
chrIII	4382649	4382887	neuroPSI:1;readCounts:5	950	+	4382649	4382887	0	2	50,50	0,188
chrIII	4383168	4383632	neuroPSI:1;readCounts:6	950	+	4383168	4383632	0	2	50,50	0,414
chrIII	4379514	4379683	neuroPSI:1;readCounts:1748	950	-	4379514	4379683	0	2	50,50	0,119
chrIII	4333012	4333184	neuroPSI:1;readCounts:43	950	+	4333012	4333184	0	2	50,50	0,122
chrIII	4333174	4333443	neuroPSI:1;readCounts:17	950	+	4333174	4333443	0	2	50,50	0,219
chrIII	4333539	4334169	neuroPSI:0.283;readCounts:15	950	+	4333539	4334169	0	2	50,50	0,580
chrIII	4333539	4334175	neuroPSI:0.717;readCounts:38	950	+	4333539	4334175	0	2	50,50	0,586
chrIII	4334273	4336270	neuroPSI:0.258;readCounts:17	950	+	4334273	4336270	0	2	50,50	0,1947
chrIII	4334273	4336276	neuroPSI:0.389;readCounts:49	950	+	4334273	4336276	0	2	50,50	0,1953
chrIII	4336097	4336276	neuroPSI:0.611;readCounts:77	950	+	4336097	4336276	0	2	50,50	0,129
chrIII	4336303	4336837	neuroPSI:1;readCounts:245	950	+	4336303	4336837	0	2	50,50	0,484
chrIII	4336851	4337008	neuroPSI:1;readCounts:255	950	+	4336851	4337008	0	2	50,50	0,107
chrIII	4337129	4337582	neuroPSI:1;readCounts:278	950	+	4337129	4337582	0	2	50,50	0,403
chrIII	4337628	4337780	neuroPSI:1;readCounts:431	950	+	4337628	4337780	0	2	50,50	0,102
chrIII	4337970	4338128	neuroPSI:1;readCounts:630	950	+	4337970	4338128	0	2	50,50	0,108
chrIII	4338102	4338463	neuroPSI:1;readCounts:564	950	+	4338102	4338463	0	2	50,50	0,311
chrIII	4338519	4338869	neuroPSI:1;readCounts:783	950	+	4338519	4338869	0	2	50,50	0,300
chrIII	4338964	4339112	neuroPSI:1;readCounts:1063	950	+	4338964	4339112	0	2	50,50	0,98
chrIII	4339163	4339557	neuroPSI:0.993;readCounts:915	950	+	4339163	4339557	0	2	50,50	0,344
chrIII	4339225	4339557	neuroPSI:0.007;readCounts:6	950	+	4339225	4339557	0	2	50,50	0,282
chrIII	4339569	4340055	neuroPSI:0.128;readCounts:118	950	+	4339569	4340055	0	2	50,50	0,436
chrIII	4339569	4340064	neuroPSI:0.795;readCounts:733	950	+	4339569	4340064	0	2	50,50	0,445
chrIII	4339569	4340067	neuroPSI:0.077;readCounts:71	950	+	4339569	4340067	0	2	50,50	0,448
chrIII	4371028	4371176	neuroPSI:1;readCounts:6	950	+	4371028	4371176	0	2	50,50	0,98
chrIII	4371204	4371607	neuroPSI:1;readCounts:5	950	+	4371204	4371607	0	2	50,50	0,353
chrIII	4371767	4371928	neuroPSI:1;readCounts:5	950	+	4371767	4371928	0	2	50,50	0,111
chrIII	4371994	4372141	neuroPSI:1;readCounts:23	950	+	4371994	4372141	0	2	50,50	0,97
chrIII	4372263	4372636	neuroPSI:1;readCounts:24	950	+	4372263	4372636	0	2	50,50	0,323
chrIII	4350847	4350996	neuroPSI:1;readCounts:13	950	-	4350847	4350996	0	2	50,50	0,99
chrIII	4351109	4351288	neuroPSI:1;readCounts:31	950	-	4351109	4351288	0	2	50,50	0,129
chrIII	4351654	4351802	neuroPSI:1;readCounts:15	950	-	4351654	4351802	0	2	50,50	0,98
chrIII	4351824	4351980	neuroPSI:1;readCounts:14	950	-	4351824	4351980	0	2	50,50	0,106
chrIII	4351984	4352143	neuroPSI:1;readCounts:8	950	-	4351984	4352143	0	2	50,50	0,109
chrIII	4342083	4342235	neuroPSI:1;readCounts:1262	950	-	4342083	4342235	0	2	50,50	0,102
chrIII	4342240	4342833	neuroPSI:1;readCounts:561	950	-	4342240	4342833	0	2	50,50	0,543
chrIII	4342762	4343096	neuroPSI:1;readCounts:11	950	-	4342762	4343096	0	2	50,50	0,284
chrIII	4343029	4343198	neuroPSI:1;readCounts:825	950	-	4343029	4343198	0	2	50,50	0,119
chrIII	4343551	4343699	neuroPSI:1;readCounts:491	950	+	4343551	4343699	0	2	50,50	0,98
chrIII	4343777	4343979	neuroPSI:1;readCounts:853	950	+	4343777	4343979	0	2	50,50	0,152
chrIII	4344044	4344196	neuroPSI:1;readCounts:1151	950	+	4344044	4344196	0	2	50,50	0,102
chrIII	4344235	4344632	neuroPSI:1;readCounts:1918	950	+	4344235	4344632	0	2	50,50	0,347
chrIII	4344739	4344895	neuroPSI:1;readCounts:3082	950	+	4344739	4344895	0	2	50,50	0,106
chrIII	4344882	4345037	neuroPSI:1;readCounts:3028	950	+	4344882	4345037	0	2	50,50	0,105
chrIII	4345450	4345922	neuroPSI:1;readCounts:64	950	+	4345450	4345922	0	2	50,50	0,422
chrIII	4346117	4346437	neuroPSI:0.087;readCounts:8	950	+	4346117	4346437	0	2	50,50	0,270
chrIII	4346117	4346446	neuroPSI:0.913;readCounts:84	950	+	4346117	4346446	0	2	50,50	0,279
chrIII	4346442	4346591	neuroPSI:1;readCounts:87	950	+	4346442	4346591	0	2	50,50	0,99
chrIII	4346650	4346875	neuroPSI:1;readCounts:144	950	+	4346650	4346875	0	2	50,50	0,175
chrIII	4346891	4347119	neuroPSI:1;readCounts:185	950	+	4346891	4347119	0	2	50,50	0,178
chrIII	4347290	4347801	neuroPSI:1;readCounts:295	950	+	4347290	4347801	0	2	50,50	0,461
chrIII	4347920	4348507	neuroPSI:1;readCounts:775	950	+	4347920	4348507	0	2	50,50	0,537
chrIII	4348945	4349787	neuroPSI:0.984;readCounts:1194	950	+	4348945	4349787	0	2	50,50	0,792
chrIII	4348949	4349787	neuroPSI:0.016;readCounts:19	950	+	4348949	4349787	0	2	50,50	0,788
chrIII	4353485	4353633	neuroPSI:1;readCounts:6	950	+	4353485	4353633	0	2	50,50	0,98
chrIII	4354009	4354316	neuroPSI:1;readCounts:5	950	+	4354009	4354316	0	2	50,50	0,257
chrIII	4354927	4355782	neuroPSI:1;readCounts:8	950	+	4354927	4355782	0	2	50,50	0,805
chrIII	4358370	4360776	neuroPSI:1;readCounts:10	950	+	4358370	4360776	0	2	50,50	0,2356
chrIII	4361317	4362018	neuroPSI:1;readCounts:27	950	+	4361317	4362018	0	2	50,50	0,651
chrIII	4362029	4363281	neuroPSI:1;readCounts:20	950	+	4362029	4363281	0	2	50,50	0,1202
chrIII	4363424	4363619	neuroPSI:1;readCounts:29	950	+	4363424	4363619	0	2	50,50	0,145
chrIII	4363861	4364088	neuroPSI:1;readCounts:55	950	+	4363861	4364088	0	2	50,50	0,177
chrIII	4364147	4364496	neuroPSI:1;readCounts:72	950	+	4364147	4364496	0	2	50,50	0,299
chrIII	4365404	4365555	neuroPSI:1;readCounts:58	950	+	4365404	4365555	0	2	50,50	0,101
chrIII	4365583	4365999	neuroPSI:1;readCounts:89	950	+	4365583	4365999	0	2	50,50	0,366
chrIII	4366027	4366312	neuroPSI:1;readCounts:147	950	+	4366027	4366312	0	2	50,50	0,235
chrIII	4366315	4366519	neuroPSI:1;readCounts:228	950	+	4366315	4366519	0	2	50,50	0,154
chrIII	4366530	4366677	neuroPSI:1;readCounts:259	950	+	4366530	4366677	0	2	50,50	0,97
chrIII	4366721	4366991	neuroPSI:1;readCounts:10	950	+	4366721	4366991	0	2	50,50	0,220
chrIII	4366743	4366912	neuroPSI:1;readCounts:312	950	+	4366743	4366912	0	2	50,50	0,119
chrIII	4367037	4367201	neuroPSI:1;readCounts:404	950	+	4367037	4367201	0	2	50,50	0,114
chrIII	4367940	4368091	neuroPSI:1;readCounts:126	950	+	4367940	4368091	0	2	50,50	0,101
chrIII	4368119	4368265	neuroPSI:1;readCounts:161	950	+	4368119	4368265	0	2	50,50	0,96
chrIII	4368293	4368472	neuroPSI:1;readCounts:199	950	+	4368293	4368472	0	2	50,50	0,129
chrIII	4368475	4368621	neuroPSI:1;readCounts:284	950	+	4368475	4368621	0	2	50,50	0,96
chrIII	4368632	4368779	neuroPSI:1;readCounts:358	950	+	4368632	4368779	0	2	50,50	0,97
chrIII	4368845	4368988	neuroPSI:1;readCounts:449	950	+	4368845	4368988	0	2	50,50	0,93
chrIII	4369113	4369915	neuroPSI:0.974;readCounts:717	950	+	4369113	4369915	0	2	50,50	0,752
chrIII	4369440	4369915	neuroPSI:0.008;readCounts:6	950	+	4369440	4369915	0	2	50,50	0,425
chrIII	4369663	4369915	neuroPSI:0.018;readCounts:13	950	+	4369663	4369915	0	2	50,50	0,202
chrII	4378828	4379466	neuroPSI:1;readCounts:860	950	+	4378828	4379466	0	2	50,50	0,588
chrII	4379521	4379665	neuroPSI:1;readCounts:1349	950	+	4379521	4379665	0	2	50,50	0,94
chrII	4379736	4379882	neuroPSI:1;readCounts:1863	950	+	4379736	4379882	0	2	50,50	0,96
chrII	4379827	4383672	neuroPSI:1;readCounts:1772	950	+	4379827	4383672	0	2	50,50	0,3795
chrII	4383632	4384868	neuroPSI:1;readCounts:2231	950	+	4383632	4384868	0	2	50,50	0,1186
chrII	4384931	4386200	neuroPSI:0.997;readCounts:2294	950	+	4384931	4386200	0	2	50,50	0,1219
chrII	4384931	4386206	neuroPSI:0.003;readCounts:7	950	+	4384931	4386206	0	2	50,50	0,1225
chrII	4364281	4364752	neuroPSI:1;readCounts:14	950	+	4364281	4364752	0	2	50,50	0,421
chrII	4365672	4366227	neuroPSI:1;readCounts:9	950	+	4365672	4366227	0	2	50,50	0,505
chrII	4366351	4366764	neuroPSI:1;readCounts:8	950	+	4366351	4366764	0	2	50,50	0,363
chrII	4366908	4367054	neuroPSI:1;readCounts:6	950	+	4366908	4367054	0	2	50,50	0,96
chrII	4369720	4369862	neuroPSI:1;readCounts:1206	950	-	4369720	4369862	0	2	50,50	0,92
chrII	4369963	4370107	neuroPSI:1;readCounts:1702	950	-	4369963	4370107	0	2	50,50	0,94
chrII	4370063	4370251	neuroPSI:1;readCounts:7	950	-	4370063	4370251	0	2	50,50	0,138
chrII	4370292	4370445	neuroPSI:0.026;readCounts:34	950	-	4370292	4370445	0	2	50,50	0,103
chrII	4370292	4370720	neuroPSI:0.974;readCounts:1268	950	-	4370292	4370720	0	2	50,50	0,378
chrII	4370463	4370720	neuroPSI:0.019;readCounts:25	950	-	4370463	4370720	0	2	50,50	0,207
chrII	4370797	4371194	neuroPSI:1;readCounts:885	950	-	4370797	4371194	0	2	50,50	0,347
chrII	4371583	4372469	neuroPSI:1;readCounts:310	950	-	4371583	4372469	0	2	50,50	0,836
chrII	4373352	4373936	neuroPSI:1;readCounts:5028	950	-	4373352	4373936	0	2	50,50	0,534
chrII	4374052	4374213	neuroPSI:1;readCounts:2932	950	-	4374052	4374213	0	2	50,50	0,111
chrII	4374267	4374417	neuroPSI:1;readCounts:2788	950	-	4374267	4374417	0	2	50,50	0,100
chrII	4374444	4374597	neuroPSI:0.029;readCounts:63	950	-	4374444	4374597	0	2	50,50	0,103
chrII	4374444	4374617	neuroPSI:0.863;readCounts:1889	950	-	4374444	4374617	0	2	50,50	0,123
chrII	4374444	4375278	neuroPSI:0.109;readCounts:238	950	-	4374444	4375278	0	2	50,50	0,784
chrII	4374648	4375278	neuroPSI:0.874;readCounts:1649	950	-	4374648	4375278	0	2	50,50	0,580
chrII	4375298	4375641	neuroPSI:1;readCounts:1000	950	-	4375298	4375641	0	2	50,50	0,293
chrII	4375661	4376440	neuroPSI:1;readCounts:823	950	-	4375661	4376440	0	2	50,50	0,729
chrII	4379985	4380274	neuroPSI:1;readCounts:152	950	-	4379985	4380274	0	2	50,50	0,239
chrII	4380480	4381237	neuroPSI:1;readCounts:58	950	-	4380480	4381237	0	2	50,50	0,707
chrII	4381291	4381464	neuroPSI:1;readCounts:62	950	-	4381291	4381464	0	2	50,50	0,123
chrII	4381576	4383031	neuroPSI:1;readCounts:42	950	-	4381576	4383031	0	2	50,50	0,1405
chrII	4383040	4383300	neuroPSI:1;readCounts:23	950	-	4383040	4383300	0	2	50,50	0,210
chrII	4368745	4368998	neuroPSI:1;readCounts:5	950	+	4368745	4368998	0	2	50,50	0,203
chrII	4369261	4369452	neuroPSI:1;readCounts:9	950	+	4369261	4369452	0	2	50,50	0,141
chrX	1896941	1897096	neuroPSI:1;readCounts:3077	950	-	1896941	1897096	0	2	50,50	0,105
chrX	17186487	17186632	neuroPSI:1;readCounts:6	950	+	17186487	17186632	0	2	50,50	0,95
chrX	17186700	17187207	neuroPSI:1;readCounts:15	950	+	17186700	17187207	0	2	50,50	0,457
chrX	17187248	17187400	neuroPSI:1;readCounts:14	950	+	17187248	17187400	0	2	50,50	0,102
chrX	17187381	17187542	neuroPSI:1;readCounts:27	950	+	17187381	17187542	0	2	50,50	0,111
chrX	17187631	17187801	neuroPSI:1;readCounts:27	950	+	17187631	17187801	0	2	50,50	0,120
chrX	17188168	17189028	neuroPSI:1;readCounts:58	950	+	17188168	17189028	0	2	50,50	0,810
chrX	17189046	17189194	neuroPSI:1;readCounts:66	950	+	17189046	17189194	0	2	50,50	0,98
chrX	17189224	17189436	neuroPSI:0.761;readCounts:54	950	+	17189224	17189436	0	2	50,50	0,162
chrX	17189224	17190597	neuroPSI:0.147;readCounts:17	950	+	17189224	17190597	0	2	50,50	0,1323
chrX	17189451	17189596	neuroPSI:1;readCounts:43	950	+	17189451	17189596	0	2	50,50	0,95
chrX	17189570	17190350	neuroPSI:1;readCounts:65	950	+	17189570	17190350	0	2	50,50	0,730
chrX	17190382	17190597	neuroPSI:0.853;readCounts:99	950	+	17190382	17190597	0	2	50,50	0,165
chrX	17190724	17190893	neuroPSI:1;readCounts:146	950	+	17190724	17190893	0	2	50,50	0,119
chrX	17192033	17192182	neuroPSI:1;readCounts:764	950	+	17192033	17192182	0	2	50,50	0,99
chrX	17192383	17192842	neuroPSI:0.979;readCounts:860	950	+	17192383	17192842	0	2	50,50	0,409
chrX	17192383	17192847	neuroPSI:0.021;readCounts:18	950	+	17192383	17192847	0	2	50,50	0,414
chrX	17193699	17194297	neuroPSI:1;readCounts:906	950	-	17193699	17194297	0	2	50,50	0,548
chrX	17194300	17194895	neuroPSI:1;readCounts:569	950	-	17194300	17194895	0	2	50,50	0,545
chrX	17194884	17195057	neuroPSI:1;readCounts:440	950	-	17194884	17195057	0	2	50,50	0,123
chrIII	8703534	8703678	neuroPSI:1;readCounts:417	950	-	8703534	8703678	0	2	50,50	0,94
chrIII	8703673	8703826	neuroPSI:1;readCounts:375	950	-	8703673	8703826	0	2	50,50	0,103
chrIII	8703811	8703960	neuroPSI:1;readCounts:352	950	-	8703811	8703960	0	2	50,50	0,99
chrIII	8703967	8704447	neuroPSI:1;readCounts:425	950	-	8703967	8704447	0	2	50,50	0,430
chrIII	8704478	8704659	neuroPSI:1;readCounts:251	950	-	8704478	8704659	0	2	50,50	0,131
chrIII	8704704	8704848	neuroPSI:1;readCounts:184	950	-	8704704	8704848	0	2	50,50	0,94
chrIII	8704804	8704953	neuroPSI:1;readCounts:202	950	-	8704804	8704953	0	2	50,50	0,99
chrIII	8704897	8706499	neuroPSI:1;readCounts:184	950	-	8704897	8706499	0	2	50,50	0,1552
chrIII	8706638	8706886	neuroPSI:1;readCounts:125	950	-	8706638	8706886	0	2	50,50	0,198
chrIII	8706930	8707224	neuroPSI:0.106;readCounts:10	950	-	8706930	8707224	0	2	50,50	0,244
chrIII	8706930	8707310	neuroPSI:0.096;readCounts:9	950	-	8706930	8707310	0	2	50,50	0,330
chrIII	8706930	8707459	neuroPSI:0.798;readCounts:75	950	-	8706930	8707459	0	2	50,50	0,479
chrIII	8707264	8707459	neuroPSI:0.096;readCounts:8	950	-	8707264	8707459	0	2	50,50	0,145
chrIII	8707577	8707911	neuroPSI:1;readCounts:74	950	-	8707577	8707911	0	2	50,50	0,284
chrIII	8707955	8708096	neuroPSI:1;readCounts:79	950	-	8707955	8708096	0	2	50,50	0,91
chrIII	8708095	8708238	neuroPSI:1;readCounts:68	950	-	8708095	8708238	0	2	50,50	0,93
chrIII	8708367	8708513	neuroPSI:1;readCounts:45	950	-	8708367	8708513	0	2	50,50	0,96
chrIII	8708823	8709177	neuroPSI:1;readCounts:20	950	-	8708823	8709177	0	2	50,50	0,304
chrIII	8709258	8709406	neuroPSI:1;readCounts:10	950	-	8709258	8709406	0	2	50,50	0,98
chrIII	8709416	8709559	neuroPSI:1;readCounts:12	950	-	8709416	8709559	0	2	50,50	0,93
chrIII	8709604	8710104	neuroPSI:1;readCounts:5	950	-	8709604	8710104	0	2	50,50	0,450
chrIII	8714640	8714789	neuroPSI:1;readCounts:472	950	-	8714640	8714789	0	2	50,50	0,99
chrIII	8714913	8715321	neuroPSI:1;readCounts:215	950	-	8714913	8715321	0	2	50,50	0,358
chrIII	8715362	8715516	neuroPSI:1;readCounts:217	950	-	8715362	8715516	0	2	50,50	0,104
chrIII	8715495	8715649	neuroPSI:1;readCounts:140	950	-	8715495	8715649	0	2	50,50	0,104
chrIII	8715920	8716166	neuroPSI:1;readCounts:106	950	-	8715920	8716166	0	2	50,50	0,196
chrIII	8717679	8717842	neuroPSI:0.001;readCounts:6	950	+	8717679	8717842	0	2	50,50	0,113
chrIII	8717679	8717966	neuroPSI:0.999;readCounts:4068	950	+	8717679	8717966	0	2	50,50	0,237
chrIII	8718105	8718254	neuroPSI:1;readCounts:3686	950	+	8718105	8718254	0	2	50,50	0,99
chrIII	8705361	8705536	neuroPSI:1;readCounts:40	950	+	8705361	8705536	0	2	50,50	0,125
chrIII	8705631	8705918	neuroPSI:1;readCounts:70	950	+	8705631	8705918	0	2	50,50	0,237
chrIII	8706049	8706197	neuroPSI:1;readCounts:143	950	+	8706049	8706197	0	2	50,50	0,98
chrIII	8684845	8685161	neuroPSI:1;readCounts:115	950	+	8684845	8685161	0	2	50,50	0,266
chrIII	8685309	8685451	neuroPSI:1;readCounts:187	950	+	8685309	8685451	0	2	50,50	0,92
chrIII	8685466	8685885	neuroPSI:1;readCounts:188	950	+	8685466	8685885	0	2	50,50	0,369
chrIII	8685929	8686078	neuroPSI:1;readCounts:10	950	+	8685929	8686078	0	2	50,50	0,99
chrIII	8686070	8686289	neuroPSI:1;readCounts:183	950	+	8686070	8686289	0	2	50,50	0,169
chrIII	8686983	8687150	neuroPSI:1;readCounts:2700	950	-	8686983	8687150	0	2	50,50	0,117
chrIII	8687375	8687532	neuroPSI:1;readCounts:1368	950	-	8687375	8687532	0	2	50,50	0,107
chrIII	8687892	8688041	neuroPSI:1;readCounts:588	950	-	8687892	8688041	0	2	50,50	0,99
chrIII	8688116	8688487	neuroPSI:1;readCounts:28	950	-	8688116	8688487	0	2	50,50	0,321
chrIII	8689952	8690163	neuroPSI:1;readCounts:48	950	+	8689952	8690163	0	2	50,50	0,161
chrIII	8690198	8690384	neuroPSI:1;readCounts:59	950	+	8690198	8690384	0	2	50,50	0,136
chrIII	8690454	8690601	neuroPSI:1;readCounts:149	950	+	8690454	8690601	0	2	50,50	0,97
chrIII	8690630	8690791	neuroPSI:1;readCounts:197	950	+	8690630	8690791	0	2	50,50	0,111
chrIII	8690788	8690936	neuroPSI:1;readCounts:263	950	+	8690788	8690936	0	2	50,50	0,98
chrIII	8690891	8691257	neuroPSI:1;readCounts:309	950	+	8690891	8691257	0	2	50,50	0,316
chrIII	8691474	8691629	neuroPSI:1;readCounts:8	950	+	8691474	8691629	0	2	50,50	0,105
chrIII	8691688	8692251	neuroPSI:1;readCounts:673	950	+	8691688	8692251	0	2	50,50	0,513
chrIII	8692640	8692791	neuroPSI:1;readCounts:956	950	+	8692640	8692791	0	2	50,50	0,101
chrIII	8692914	8693229	neuroPSI:1;readCounts:1332	950	+	8692914	8693229	0	2	50,50	0,265
chrIII	8697010	8697408	neuroPSI:1;readCounts:182	950	+	8697010	8697408	0	2	50,50	0,348
chrIII	8697665	8698032	neuroPSI:1;readCounts:445	950	+	8697665	8698032	0	2	50,50	0,317
chrIII	8698178	8698400	neuroPSI:1;readCounts:554	950	+	8698178	8698400	0	2	50,50	0,172
chrIII	8698482	8698635	neuroPSI:1;readCounts:846	950	+	8698482	8698635	0	2	50,50	0,103
chrIII	8700933	8701089	neuroPSI:1;readCounts:37	950	+	8700933	8701089	0	2	50,50	0,106
chrIII	8701112	8701269	neuroPSI:1;readCounts:78	950	+	8701112	8701269	0	2	50,50	0,107
chrIII	8701331	8701476	neuroPSI:1;readCounts:91	950	+	8701331	8701476	0	2	50,50	0,95
chrIII	8701457	8701603	neuroPSI:1;readCounts:113	950	+	8701457	8701603	0	2	50,50	0,96
chrIII	8701601	8701794	neuroPSI:1;readCounts:146	950	+	8701601	8701794	0	2	50,50	0,143
chrIII	8702205	8702351	neuroPSI:1;readCounts:194	950	+	8702205	8702351	0	2	50,50	0,96
chrIII	8702414	8702560	neuroPSI:1;readCounts:276	950	+	8702414	8702560	0	2	50,50	0,96
chrII	4519188	4520998	neuroPSI:1;readCounts:36	950	+	4519188	4520998	0	2	50,50	0,1760
chrII	4521176	4521316	neuroPSI:0.45;readCounts:18	950	+	4521176	4521316	0	2	50,50	0,90
chrII	4521176	4521328	neuroPSI:0.55;readCounts:22	950	+	4521176	4521328	0	2	50,50	0,102
chrII	4521491	4521640	neuroPSI:1;readCounts:83	950	+	4521491	4521640	0	2	50,50	0,99
chrII	4521646	4522024	neuroPSI:0.653;readCounts:47	950	+	4521646	4522024	0	2	50,50	0,328
chrII	4521668	4522024	neuroPSI:0.347;readCounts:25	950	+	4521668	4522024	0	2	50,50	0,306
chrII	4521984	4522401	neuroPSI:1;readCounts:76	950	+	4521984	4522401	0	2	50,50	0,367
chrII	4523653	4523802	neuroPSI:1;readCounts:265	950	+	4523653	4523802	0	2	50,50	0,99
chrII	4523780	4523929	neuroPSI:1;readCounts:233	950	+	4523780	4523929	0	2	50,50	0,99
chrII	4524253	4524399	neuroPSI:0.053;readCounts:25	950	+	4524253	4524399	0	2	50,50	0,96
chrII	4524253	4524408	neuroPSI:0.947;readCounts:451	950	+	4524253	4524408	0	2	50,50	0,105
chrII	4512958	4513223	neuroPSI:1;readCounts:6	950	+	4512958	4513223	0	2	50,50	0,215
chrII	4513217	4513480	neuroPSI:1;readCounts:9	950	+	4513217	4513480	0	2	50,50	0,213
chrII	4513505	4514046	neuroPSI:1;readCounts:21	950	+	4513505	4514046	0	2	50,50	0,491
chrII	4514383	4515025	neuroPSI:1;readCounts:46	950	+	4514383	4515025	0	2	50,50	0,592
chrII	4515472	4515994	neuroPSI:1;readCounts:84	950	+	4515472	4515994	0	2	50,50	0,472
chrII	4522647	4522794	neuroPSI:1;readCounts:265	950	-	4522647	4522794	0	2	50,50	0,97
chrII	4522792	4522937	neuroPSI:1;readCounts:322	950	-	4522792	4522937	0	2	50,50	0,95
chrII	4522980	4523124	neuroPSI:1;readCounts:226	950	-	4522980	4523124	0	2	50,50	0,94
chrII	4529994	4530310	neuroPSI:1;readCounts:31	950	-	4529994	4530310	0	2	50,50	0,266
chrII	4530487	4530633	neuroPSI:1;readCounts:23	950	-	4530487	4530633	0	2	50,50	0,96
chrII	4530643	4530851	neuroPSI:1;readCounts:22	950	-	4530643	4530851	0	2	50,50	0,158
chrII	4530827	4530988	neuroPSI:1;readCounts:18	950	-	4530827	4530988	0	2	50,50	0,111
chrII	4531034	4531369	neuroPSI:1;readCounts:6	950	-	4531034	4531369	0	2	50,50	0,285
chrII	4531380	4531870	neuroPSI:1;readCounts:11	950	-	4531380	4531870	0	2	50,50	0,440
chrII	4534858	4535014	neuroPSI:1;readCounts:31	950	-	4534858	4535014	0	2	50,50	0,106
chrII	4535101	4535263	neuroPSI:1;readCounts:34	950	-	4535101	4535263	0	2	50,50	0,112
chrII	4535253	4535783	neuroPSI:1;readCounts:11	950	-	4535253	4535783	0	2	50,50	0,480
chrII	4542036	4542181	neuroPSI:1;readCounts:52	950	-	4542036	4542181	0	2	50,50	0,95
chrII	4542268	4542808	neuroPSI:1;readCounts:51	950	-	4542268	4542808	0	2	50,50	0,490
chrII	4542905	4543051	neuroPSI:1;readCounts:16	950	-	4542905	4543051	0	2	50,50	0,96
chrII	4543021	4543169	neuroPSI:1;readCounts:19	950	-	4543021	4543169	0	2	50,50	0,98
chrII	4543215	4543418	neuroPSI:1;readCounts:9	950	-	4543215	4543418	0	2	50,50	0,153
chrII	4543429	4543583	neuroPSI:1;readCounts:6	950	-	4543429	4543583	0	2	50,50	0,104
chrII	4524775	4524921	neuroPSI:1;readCounts:27	950	-	4524775	4524921	0	2	50,50	0,96
chrII	4525095	4526107	neuroPSI:1;readCounts:19	950	-	4525095	4526107	0	2	50,50	0,962
chrII	4526181	4526339	neuroPSI:0.467;readCounts:7	950	-	4526181	4526339	0	2	50,50	0,108
chrII	4526193	4526339	neuroPSI:0.533;readCounts:8	950	-	4526193	4526339	0	2	50,50	0,96
chrII	4526806	4527839	neuroPSI:1;readCounts:6	950	-	4526806	4527839	0	2	50,50	0,983
chrII	4539132	4539495	neuroPSI:0.897;readCounts:52	950	-	4539132	4539495	0	2	50,50	0,313
chrII	4539132	4539742	neuroPSI:0.103;readCounts:6	950	-	4539132	4539742	0	2	50,50	0,560
chrII	4539523	4539742	neuroPSI:0.6;readCounts:30	950	-	4539523	4539742	0	2	50,50	0,169
chrII	4539585	4539742	neuroPSI:0.28;readCounts:14	950	-	4539585	4539742	0	2	50,50	0,107
chrII	4539744	4539889	neuroPSI:1;readCounts:31	950	-	4539744	4539889	0	2	50,50	0,95
chrII	4539960	4540123	neuroPSI:1;readCounts:20	950	-	4539960	4540123	0	2	50,50	0,113
chrII	4540169	4540334	neuroPSI:1;readCounts:10	950	-	4540169	4540334	0	2	50,50	0,115
chrII	4540345	4540631	neuroPSI:1;readCounts:17	950	-	4540345	4540631	0	2	50,50	0,236
chrX	493437	494061	neuroPSI:1;readCounts:49	950	+	493437	494061	0	2	50,50	0,574
chrX	494099	495080	neuroPSI:1;readCounts:70	950	+	494099	495080	0	2	50,50	0,931
chrX	495140	495288	neuroPSI:1;readCounts:105	950	+	495140	495288	0	2	50,50	0,98
chrX	495250	495434	neuroPSI:1;readCounts:117	950	+	495250	495434	0	2	50,50	0,134
chrX	495421	495567	neuroPSI:1;readCounts:189	950	+	495421	495567	0	2	50,50	0,96
chrX	495538	496245	neuroPSI:1;readCounts:220	950	+	495538	496245	0	2	50,50	0,657
chrX	496262	497151	neuroPSI:1;readCounts:293	950	+	496262	497151	0	2	50,50	0,839
chrX	502446	502951	neuroPSI:1;readCounts:49	950	-	502446	502951	0	2	50,50	0,455
chrX	502981	503136	neuroPSI:1;readCounts:50	950	-	502981	503136	0	2	50,50	0,105
chrX	503257	505341	neuroPSI:1;readCounts:22	950	-	503257	505341	0	2	50,50	0,2034
chrX	505501	505836	neuroPSI:0.667;readCounts:16	950	-	505501	505836	0	2	50,50	0,285
chrX	505501	506160	neuroPSI:0.333;readCounts:8	950	-	505501	506160	0	2	50,50	0,609
chrX	505925	506160	neuroPSI:0.429;readCounts:6	950	-	505925	506160	0	2	50,50	0,185
chrX	506133	506825	neuroPSI:1;readCounts:22	950	-	506133	506825	0	2	50,50	0,642
chrX	510832	510989	neuroPSI:0.908;readCounts:700	950	-	510832	510989	0	2	50,50	0,107
chrX	510839	510989	neuroPSI:0.092;readCounts:71	950	-	510839	510989	0	2	50,50	0,100
chrX	511000	511540	neuroPSI:1;readCounts:691	950	-	511000	511540	0	2	50,50	0,490
chrX	511937	512605	neuroPSI:1;readCounts:278	950	-	511937	512605	0	2	50,50	0,618
chrX	513090	514519	neuroPSI:1;readCounts:22	950	-	513090	514519	0	2	50,50	0,1379
chrX	514481	520551	neuroPSI:1;readCounts:11	950	-	514481	520551	0	2	50,50	0,6020
chrX	520768	520912	neuroPSI:1;readCounts:10	950	-	520768	520912	0	2	50,50	0,94
chrX	526220	526566	neuroPSI:1;readCounts:549	950	-	526220	526566	0	2	50,50	0,296
chrX	526554	526701	neuroPSI:1;readCounts:682	950	-	526554	526701	0	2	50,50	0,97
chrX	526715	526861	neuroPSI:1;readCounts:590	950	-	526715	526861	0	2	50,50	0,96
chrX	526873	527016	neuroPSI:1;readCounts:376	950	-	526873	527016	0	2	50,50	0,93
chrX	526989	527887	neuroPSI:1;readCounts:372	950	-	526989	527887	0	2	50,50	0,848
chrX	528109	528259	neuroPSI:1;readCounts:129	950	-	528109	528259	0	2	50,50	0,100
chrX	528354	528614	neuroPSI:0.041;readCounts:5	950	-	528354	528614	0	2	50,50	0,210
chrX	528354	529530	neuroPSI:0.944;readCounts:117	950	-	528354	529530	0	2	50,50	0,1126
chrX	529371	529530	neuroPSI:0.056;readCounts:7	950	-	529371	529530	0	2	50,50	0,109
chrX	529659	529804	neuroPSI:1;readCounts:40	950	-	529659	529804	0	2	50,50	0,95
chrX	529822	530041	neuroPSI:1;readCounts:46	950	-	529822	530041	0	2	50,50	0,169
chrX	530793	530942	neuroPSI:1;readCounts:172	950	-	530793	530942	0	2	50,50	0,99
chrV	9656341	9656487	neuroPSI:1;readCounts:12	950	+	9656341	9656487	0	2	50,50	0,96
chrV	9656567	9656722	neuroPSI:1;readCounts:11	950	+	9656567	9656722	0	2	50,50	0,105
chrV	9657133	9657613	neuroPSI:1;readCounts:21	950	+	9657133	9657613	0	2	50,50	0,430
chrV	9657800	9657945	neuroPSI:1;readCounts:45	950	+	9657800	9657945	0	2	50,50	0,95
chrV	9659563	9659950	neuroPSI:1;readCounts:10	950	-	9659563	9659950	0	2	50,50	0,337
chrV	9660030	9660175	neuroPSI:1;readCounts:8	950	-	9660030	9660175	0	2	50,50	0,95
chrV	9660630	9661446	neuroPSI:1;readCounts:6	950	-	9660630	9661446	0	2	50,50	0,766
chrII	11485721	11486469	neuroPSI:1;readCounts:1787	950	-	11485721	11486469	0	2	50,50	0,698
chrII	11486497	11486643	neuroPSI:1;readCounts:1834	950	-	11486497	11486643	0	2	50,50	0,96
chrII	11493463	11493755	neuroPSI:1;readCounts:1506	950	-	11493463	11493755	0	2	50,50	0,242
chrII	11493858	11494014	neuroPSI:1;readCounts:985	950	-	11493858	11494014	0	2	50,50	0,106
chrII	11494047	11494197	neuroPSI:1;readCounts:649	950	-	11494047	11494197	0	2	50,50	0,100
chrII	11494204	11494352	neuroPSI:1;readCounts:469	950	-	11494204	11494352	0	2	50,50	0,98
chrII	11494371	11494533	neuroPSI:1;readCounts:396	950	-	11494371	11494533	0	2	50,50	0,112
chrII	11494896	11495046	neuroPSI:1;readCounts:132	950	-	11494896	11495046	0	2	50,50	0,100
chrII	11495038	11495190	neuroPSI:0.632;readCounts:79	950	-	11495038	11495190	0	2	50,50	0,102
chrII	11495044	11495190	neuroPSI:0.368;readCounts:46	950	-	11495044	11495190	0	2	50,50	0,96
chrII	11488491	11489412	neuroPSI:1;readCounts:273	950	+	11488491	11489412	0	2	50,50	0,871
chrII	11496811	11497030	neuroPSI:1;readCounts:694	950	+	11496811	11497030	0	2	50,50	0,169
chrII	11497132	11497700	neuroPSI:1;readCounts:1210	950	+	11497132	11497700	0	2	50,50	0,518
chrII	11483456	11483980	neuroPSI:1;readCounts:140	950	-	11483456	11483980	0	2	50,50	0,474
chrII	11484028	11484182	neuroPSI:1;readCounts:91	950	-	11484028	11484182	0	2	50,50	0,104
chrII	11484225	11484379	neuroPSI:1;readCounts:53	950	-	11484225	11484379	0	2	50,50	0,104
chrII	11484591	11485242	neuroPSI:1;readCounts:19	950	-	11484591	11485242	0	2	50,50	0,601
chrII	11490242	11490387	neuroPSI:0.003;readCounts:6	950	-	11490242	11490387	0	2	50,50	0,95
chrII	11490242	11490391	neuroPSI:0.997;readCounts:1815	950	-	11490242	11490391	0	2	50,50	0,99
chrII	11491251	11491581	neuroPSI:1;readCounts:282	950	-	11491251	11491581	0	2	50,50	0,280
chrII	11491586	11492018	neuroPSI:1;readCounts:216	950	-	11491586	11492018	0	2	50,50	0,382
chrII	11492124	11492964	neuroPSI:1;readCounts:68	950	-	11492124	11492964	0	2	50,50	0,790
chrII	11495726	11495876	neuroPSI:1;readCounts:1366	950	+	11495726	11495876	0	2	50,50	0,100
chrII	11495877	11496028	neuroPSI:1;readCounts:1491	950	+	11495877	11496028	0	2	50,50	0,101
chrII	11496110	11496255	neuroPSI:1;readCounts:2968	950	+	11496110	11496255	0	2	50,50	0,95
chrII	11497946	11498113	neuroPSI:1;readCounts:505	950	+	11497946	11498113	0	2	50,50	0,117
chrII	11498176	11498325	neuroPSI:1;readCounts:722	950	+	11498176	11498325	0	2	50,50	0,99
chrII	11498489	11499018	neuroPSI:1;readCounts:1202	950	+	11498489	11499018	0	2	50,50	0,479
chrII	11511037	11511420	neuroPSI:1;readCounts:25	950	+	11511037	11511420	0	2	50,50	0,333
chrII	11511425	11511847	neuroPSI:1;readCounts:22	950	+	11511425	11511847	0	2	50,50	0,372
chrII	11511871	11512806	neuroPSI:1;readCounts:32	950	+	11511871	11512806	0	2	50,50	0,885
chrII	11513145	11513649	neuroPSI:1;readCounts:76	950	+	11513145	11513649	0	2	50,50	0,454
chrII	11515206	11515955	neuroPSI:1;readCounts:7	950	+	11515206	11515955	0	2	50,50	0,699
chrII	11516001	11517049	neuroPSI:1;readCounts:14	950	+	11516001	11517049	0	2	50,50	0,998
chrII	11517140	11517292	neuroPSI:0.4;readCounts:8	950	+	11517140	11517292	0	2	50,50	0,102
chrII	11517143	11517292	neuroPSI:0.6;readCounts:12	950	+	11517143	11517292	0	2	50,50	0,99
chrII	11517417	11517632	neuroPSI:1;readCounts:11	950	+	11517417	11517632	0	2	50,50	0,165
chrII	11517611	11518013	neuroPSI:1;readCounts:33	950	+	11517611	11518013	0	2	50,50	0,352
chrII	11519789	11520597	neuroPSI:1;readCounts:648	950	-	11519789	11520597	0	2	50,50	0,758
chrII	11520630	11521167	neuroPSI:1;readCounts:675	950	-	11520630	11521167	0	2	50,50	0,487
chrII	11521418	11523263	neuroPSI:1;readCounts:495	950	-	11521418	11523263	0	2	50,50	0,1795
chrII	11523538	11523689	neuroPSI:1;readCounts:259	950	-	11523538	11523689	0	2	50,50	0,101
chrII	11523850	11524621	neuroPSI:1;readCounts:194	950	-	11523850	11524621	0	2	50,50	0,721
chrII	11525798	11525946	neuroPSI:1;readCounts:44	950	-	11525798	11525946	0	2	50,50	0,98
chrII	11526407	11526559	neuroPSI:1;readCounts:16	950	-	11526407	11526559	0	2	50,50	0,102
chrIII	5722857	5723008	neuroPSI:1;readCounts:36	950	+	5722857	5723008	0	2	50,50	0,101
chrIII	5723016	5723659	neuroPSI:1;readCounts:50	950	+	5723016	5723659	0	2	50,50	0,593
chrIII	5723732	5723889	neuroPSI:1;readCounts:109	950	+	5723732	5723889	0	2	50,50	0,107
chrIII	5724173	5724462	neuroPSI:1;readCounts:188	950	+	5724173	5724462	0	2	50,50	0,239
chrIII	5725242	5725391	neuroPSI:1;readCounts:284	950	+	5725242	5725391	0	2	50,50	0,99
chrIII	5725638	5725790	neuroPSI:1;readCounts:601	950	+	5725638	5725790	0	2	50,50	0,102
chrIII	5725857	5726013	neuroPSI:1;readCounts:705	950	+	5725857	5726013	0	2	50,50	0,106
chrIII	5726116	5726696	neuroPSI:1;readCounts:675	950	+	5726116	5726696	0	2	50,50	0,530
chrIII	5705741	5705946	neuroPSI:0;readCounts:6	950	-	5705741	5705946	0	2	50,50	0,155
chrIII	5705750	5705946	neuroPSI:1;readCounts:166853	950	-	5705750	5705946	0	2	50,50	0,146
chrIII	5705871	5706030	neuroPSI:1;readCounts:48	950	-	5705871	5706030	0	2	50,50	0,109
chrIII	5707129	5707281	neuroPSI:1;readCounts:696	950	-	5707129	5707281	0	2	50,50	0,102
chrIII	5707381	5707526	neuroPSI:1;readCounts:613	950	-	5707381	5707526	0	2	50,50	0,95
chrIII	5707602	5707744	neuroPSI:0.018;readCounts:6	950	-	5707602	5707744	0	2	50,50	0,92
chrIII	5707602	5707894	neuroPSI:0.982;readCounts:330	950	-	5707602	5707894	0	2	50,50	0,242
chrIII	5707953	5708328	neuroPSI:1;readCounts:48	950	-	5707953	5708328	0	2	50,50	0,325
chrIII	5708354	5708565	neuroPSI:1;readCounts:33	950	-	5708354	5708565	0	2	50,50	0,161
chrIII	5708576	5708721	neuroPSI:1;readCounts:28	950	-	5708576	5708721	0	2	50,50	0,95
chrIII	5708770	5708921	neuroPSI:1;readCounts:17	950	-	5708770	5708921	0	2	50,50	0,101
chrIII	5708905	5709057	neuroPSI:1;readCounts:16	950	-	5708905	5709057	0	2	50,50	0,102
chrIII	5709120	5709265	neuroPSI:1;readCounts:5	950	-	5709120	5709265	0	2	50,50	0,95
chrIII	5694284	5694498	neuroPSI:1;readCounts:2823	950	+	5694284	5694498	0	2	50,50	0,164
chrIII	5714928	5716164	neuroPSI:0.988;readCounts:1158	950	+	5714928	5716164	0	2	50,50	0,1186
chrIII	5716017	5716164	neuroPSI:0.012;readCounts:14	950	+	5716017	5716164	0	2	50,50	0,97
chrIII	5716213	5716386	neuroPSI:1;readCounts:15823	950	+	5716213	5716386	0	2	50,50	0,123
chrIII	5716213	5716890	neuroPSI:0;readCounts:6	950	+	5716213	5716890	0	2	50,50	0,627
chrIII	5716397	5716596	neuroPSI:1;readCounts:16731	950	+	5716397	5716596	0	2	50,50	0,149
chrIII	5716705	5716890	neuroPSI:1;readCounts:21935	950	+	5716705	5716890	0	2	50,50	0,135
chrIII	5711594	5711741	neuroPSI:1;readCounts:64	950	+	5711594	5711741	0	2	50,50	0,97
chrIII	5711763	5711914	neuroPSI:1;readCounts:101	950	+	5711763	5711914	0	2	50,50	0,101
chrIII	5712211	5712399	neuroPSI:0.978;readCounts:262	950	+	5712211	5712399	0	2	50,50	0,138
chrIII	5712211	5712663	neuroPSI:0.022;readCounts:6	950	+	5712211	5712663	0	2	50,50	0,402
chrIII	5712491	5712657	neuroPSI:0.09;readCounts:26	950	+	5712491	5712657	0	2	50,50	0,116
chrIII	5712491	5712663	neuroPSI:0.91;readCounts:264	950	+	5712491	5712663	0	2	50,50	0,122
chrIII	5713650	5713796	neuroPSI:1;readCounts:2440	950	+	5713650	5713796	0	2	50,50	0,96
chrIII	5713828	5713981	neuroPSI:1;readCounts:3274	950	+	5713828	5713981	0	2	50,50	0,103
chrIII	5714019	5714158	neuroPSI:0.008;readCounts:18	950	+	5714019	5714158	0	2	50,50	0,89
chrIII	5714019	5714165	neuroPSI:0.992;readCounts:2143	950	+	5714019	5714165	0	2	50,50	0,96
chrIII	5698692	5698847	neuroPSI:1;readCounts:38	950	+	5698692	5698847	0	2	50,50	0,105
chrIII	5698879	5699259	neuroPSI:1;readCounts:60	950	+	5698879	5699259	0	2	50,50	0,330
chrIII	5699366	5699586	neuroPSI:1;readCounts:147	950	+	5699366	5699586	0	2	50,50	0,170
chrIII	5699585	5699836	neuroPSI:1;readCounts:138	950	+	5699585	5699836	0	2	50,50	0,201
chrIII	5700209	5701114	neuroPSI:1;readCounts:374	950	+	5700209	5701114	0	2	50,50	0,855
chrIII	5701376	5701949	neuroPSI:1;readCounts:912	950	+	5701376	5701949	0	2	50,50	0,523
chrIII	5693020	5693168	neuroPSI:1;readCounts:555	950	+	5693020	5693168	0	2	50,50	0,98
chrIII	5693164	5693304	neuroPSI:0.462;readCounts:330	950	+	5693164	5693304	0	2	50,50	0,90
chrIII	5693164	5693307	neuroPSI:0.021;readCounts:15	950	+	5693164	5693307	0	2	50,50	0,93
chrIII	5693164	5693313	neuroPSI:0.517;readCounts:369	950	+	5693164	5693313	0	2	50,50	0,99
chrIII	5693529	5693703	neuroPSI:1;readCounts:1192	950	+	5693529	5693703	0	2	50,50	0,124
chrIII	5690339	5690923	neuroPSI:1;readCounts:2050	950	-	5690339	5690923	0	2	50,50	0,534
chrIII	5691415	5692006	neuroPSI:1;readCounts:947	950	-	5691415	5692006	0	2	50,50	0,541
chrIII	5692348	5692494	neuroPSI:1;readCounts:577	950	-	5692348	5692494	0	2	50,50	0,96
chrIII	5692480	5692627	neuroPSI:1;readCounts:414	950	-	5692480	5692627	0	2	50,50	0,97
chrIII	5695204	5695749	neuroPSI:1;readCounts:649	950	-	5695204	5695749	0	2	50,50	0,495
chrIII	5696101	5696474	neuroPSI:1;readCounts:371	950	-	5696101	5696474	0	2	50,50	0,323
chrIII	5696583	5696814	neuroPSI:1;readCounts:175	950	-	5696583	5696814	0	2	50,50	0,181
chrIII	5696861	5697123	neuroPSI:1;readCounts:172	950	-	5696861	5697123	0	2	50,50	0,212
chrIII	5697240	5697389	neuroPSI:1;readCounts:99	950	-	5697240	5697389	0	2	50,50	0,99
chrIII	5697583	5697736	neuroPSI:1;readCounts:1730	950	-	5697583	5697736	0	2	50,50	0,103
chrIII	5697729	5697880	neuroPSI:1;readCounts:1856	950	-	5697729	5697880	0	2	50,50	0,101
chrIII	5702463	5702625	neuroPSI:1;readCounts:1072	950	-	5702463	5702625	0	2	50,50	0,112
chrIII	5703059	5703206	neuroPSI:0.872;readCounts:639	950	-	5703059	5703206	0	2	50,50	0,97
chrIII	5703065	5703206	neuroPSI:0.128;readCounts:94	950	-	5703065	5703206	0	2	50,50	0,91
chrIII	5703343	5703489	neuroPSI:1;readCounts:684	950	-	5703343	5703489	0	2	50,50	0,96
chrIII	5704381	5704527	neuroPSI:1;readCounts:157	950	-	5704381	5704527	0	2	50,50	0,96
chrIII	5704570	5704757	neuroPSI:0.525;readCounts:64	950	-	5704570	5704757	0	2	50,50	0,137
chrIII	5704570	5705247	neuroPSI:0.475;readCounts:58	950	-	5704570	5705247	0	2	50,50	0,627
chrIII	5704697	5705123	neuroPSI:0.125;readCounts:7	950	-	5704697	5705123	0	2	50,50	0,376
chrIII	5704697	5705247	neuroPSI:0.458;readCounts:49	950	-	5704697	5705247	0	2	50,50	0,500
chrIII	5705275	5705460	neuroPSI:1;readCounts:71	950	-	5705275	5705460	0	2	50,50	0,135
chrX	1576705	1577403	neuroPSI:1;readCounts:16	950	+	1576705	1577403	0	2	50,50	0,648
chrX	1577467	1584921	neuroPSI:1;readCounts:17	950	+	1577467	1584921	0	2	50,50	0,7404
chrX	1584910	1585497	neuroPSI:1;readCounts:18	950	+	1584910	1585497	0	2	50,50	0,537
chrX	1585471	1586558	neuroPSI:1;readCounts:17	950	+	1585471	1586558	0	2	50,50	0,1037
chrX	1586561	1587604	neuroPSI:1;readCounts:16	950	+	1586561	1587604	0	2	50,50	0,993
chrX	1587572	1587755	neuroPSI:1;readCounts:18	950	+	1587572	1587755	0	2	50,50	0,133
chrX	1587815	1588361	neuroPSI:1;readCounts:17	950	+	1587815	1588361	0	2	50,50	0,496
chrX	1588348	1588500	neuroPSI:1;readCounts:20	950	+	1588348	1588500	0	2	50,50	0,102
chrX	1588557	1589168	neuroPSI:1;readCounts:39	950	+	1588557	1589168	0	2	50,50	0,561
chrX	1589521	1590756	neuroPSI:1;readCounts:140	950	+	1589521	1590756	0	2	50,50	0,1185
chrV	45449	45648	neuroPSI:1;readCounts:73	950	+	45449	45648	0	2	50,50	0,149
chrV	45596	46750	neuroPSI:1;readCounts:161	950	+	45596	46750	0	2	50,50	0,1104
chrV	21040	22544	neuroPSI:1;readCounts:64	950	+	21040	22544	0	2	50,50	0,1454
chrV	22806	23208	neuroPSI:1;readCounts:99	950	+	22806	23208	0	2	50,50	0,352
chrV	23244	23611	neuroPSI:0.24;readCounts:23	950	+	23244	23611	0	2	50,50	0,317
chrV	23244	23842	neuroPSI:0.76;readCounts:73	950	+	23244	23842	0	2	50,50	0,548
chrV	23595	23842	neuroPSI:0.223;readCounts:21	950	+	23595	23842	0	2	50,50	0,197
chrV	23846	24837	neuroPSI:1;readCounts:96	950	+	23846	24837	0	2	50,50	0,941
chrV	25209	26014	neuroPSI:1;readCounts:161	950	+	25209	26014	0	2	50,50	0,755
chrV	26079	26243	neuroPSI:1;readCounts:193	950	+	26079	26243	0	2	50,50	0,114
chrV	26330	28431	neuroPSI:0.56;readCounts:177	950	+	26330	28431	0	2	50,50	0,2051
chrV	26330	29385	neuroPSI:0.304;readCounts:96	950	+	26330	29385	0	2	50,50	0,3005
chrV	26330	30249	neuroPSI:0.136;readCounts:43	950	+	26330	30249	0	2	50,50	0,3869
chrV	28649	29385	neuroPSI:0.568;readCounts:126	950	+	28649	29385	0	2	50,50	0,686
chrV	28649	30249	neuroPSI:0.224;readCounts:51	950	+	28649	30249	0	2	50,50	0,1550
chrV	29465	30249	neuroPSI:0.588;readCounts:134	950	+	29465	30249	0	2	50,50	0,734
chrV	30247	30404	neuroPSI:0.252;readCounts:83	950	+	30247	30404	0	2	50,50	0,107
chrV	30247	31389	neuroPSI:0.218;readCounts:72	950	+	30247	31389	0	2	50,50	0,1092
chrV	30247	35064	neuroPSI:0.53;readCounts:175	950	+	30247	35064	0	2	50,50	0,4767
chrV	31532	35064	neuroPSI:0.268;readCounts:64	950	+	31532	35064	0	2	50,50	0,3482
chrV	35106	35588	neuroPSI:0.05;readCounts:23	950	+	35106	35588	0	2	50,50	0,432
chrV	35106	36167	neuroPSI:0.937;readCounts:433	950	+	35106	36167	0	2	50,50	0,1011
chrV	35626	36167	neuroPSI:0.063;readCounts:29	950	+	35626	36167	0	2	50,50	0,491
chrV	36805	36967	neuroPSI:1;readCounts:1406	950	+	36805	36967	0	2	50,50	0,112
chrV	37163	37899	neuroPSI:0.014;readCounts:28	950	+	37163	37899	0	2	50,50	0,686
chrV	37163	38187	neuroPSI:0.986;readCounts:1933	950	+	37163	38187	0	2	50,50	0,974
chrV	37940	38187	neuroPSI:0.011;readCounts:21	950	+	37940	38187	0	2	50,50	0,197
chrV	38219	39040	neuroPSI:0.222;readCounts:443	950	+	38219	39040	0	2	50,50	0,771
chrV	38219	40503	neuroPSI:0.76;readCounts:1552	950	+	38219	40503	0	2	50,50	0,2234
chrV	38976	40503	neuroPSI:0.24;readCounts:490	950	+	38976	40503	0	2	50,50	0,1477
chrV	40673	41778	neuroPSI:1;readCounts:2520	950	+	40673	41778	0	2	50,50	0,1055
chrV	41794	42089	neuroPSI:0.998;readCounts:3242	950	+	41794	42089	0	2	50,50	0,245
chrV	41794	42114	neuroPSI:0.002;readCounts:5	950	+	41794	42114	0	2	50,50	0,270
chrV	42116	42263	neuroPSI:1;readCounts:3530	950	+	42116	42263	0	2	50,50	0,97
chrV	42267	43075	neuroPSI:1;readCounts:3558	950	+	42267	43075	0	2	50,50	0,758
chrV	2969	5587	neuroPSI:1;readCounts:6	950	+	2969	5587	0	2	50,50	0,2568
chrV	5916	6073	neuroPSI:1;readCounts:16	950	+	5916	6073	0	2	50,50	0,107
chrV	7044	7308	neuroPSI:1;readCounts:159	950	-	7044	7308	0	2	50,50	0,214
chrV	7060	7207	neuroPSI:1;readCounts:4185	950	-	7060	7207	0	2	50,50	0,97
chrV	7334	7478	neuroPSI:0.002;readCounts:5	950	-	7334	7478	0	2	50,50	0,94
chrV	7334	7482	neuroPSI:0.794;readCounts:2877	950	-	7334	7482	0	2	50,50	0,98
chrV	7340	7482	neuroPSI:0.025;readCounts:89	950	-	7340	7482	0	2	50,50	0,92
chrV	7343	7482	neuroPSI:0.181;readCounts:657	950	-	7343	7482	0	2	50,50	0,89
chrV	7559	7700	neuroPSI:1;readCounts:1766	950	-	7559	7700	0	2	50,50	0,91
chrV	12545	13270	neuroPSI:1;readCounts:32	950	-	12545	13270	0	2	50,50	0,675
chrIV	5966713	5975606	neuroPSI:1;readCounts:27	950	+	5966713	5975606	0	2	50,50	0,8843
chrIV	5975816	5976301	neuroPSI:1;readCounts:73	950	+	5975816	5976301	0	2	50,50	0,435
chrIV	5976695	5977649	neuroPSI:1;readCounts:52	950	+	5976695	5977649	0	2	50,50	0,904
chrIV	5978367	5978823	neuroPSI:1;readCounts:210	950	+	5978367	5978823	0	2	50,50	0,406
chrIV	5979365	5979638	neuroPSI:1;readCounts:108	950	+	5979365	5979638	0	2	50,50	0,223
chrIV	5979651	5979920	neuroPSI:1;readCounts:164	950	+	5979651	5979920	0	2	50,50	0,219
chrIV	5980111	5981119	neuroPSI:1;readCounts:212	950	+	5980111	5981119	0	2	50,50	0,958
chrIV	5981372	5982332	neuroPSI:0.818;readCounts:265	950	+	5981372	5982332	0	2	50,50	0,910
chrIV	5981372	5982484	neuroPSI:0.182;readCounts:59	950	+	5981372	5982484	0	2	50,50	0,1062
chrIV	5982250	5982484	neuroPSI:0.792;readCounts:224	950	+	5982250	5982484	0	2	50,50	0,184
chrIV	5982517	5982663	neuroPSI:1;readCounts:357	950	+	5982517	5982663	0	2	50,50	0,96
chrIV	5984406	5984617	neuroPSI:0.995;readCounts:9267	950	+	5984406	5984617	0	2	50,50	0,161
chrIV	5984406	5984620	neuroPSI:0.005;readCounts:49	950	+	5984406	5984620	0	2	50,50	0,164
chrIV	5984695	5984845	neuroPSI:1;readCounts:9332	950	+	5984695	5984845	0	2	50,50	0,100
chrIV	5984930	5985142	neuroPSI:0.981;readCounts:10479	950	+	5984930	5985142	0	2	50,50	0,162
chrIV	5984930	5986568	neuroPSI:0.019;readCounts:199	950	+	5984930	5986568	0	2	50,50	0,1588
chrIV	5985120	5986568	neuroPSI:0.635;readCounts:3019	950	+	5985120	5986568	0	2	50,50	0,1398
chrIV	5986305	5986568	neuroPSI:0.324;readCounts:1540	950	+	5986305	5986568	0	2	50,50	0,213
chrIV	5986618	5987279	neuroPSI:1;readCounts:5139	950	+	5986618	5987279	0	2	50,50	0,611
chrIV	5987206	5988337	neuroPSI:1;readCounts:43	950	+	5987206	5988337	0	2	50,50	0,1081
chrIV	6003212	6003367	neuroPSI:1;readCounts:3456	950	+	6003212	6003367	0	2	50,50	0,105
chrIV	6003498	6003918	neuroPSI:1;readCounts:5156	950	+	6003498	6003918	0	2	50,50	0,370
chrIV	6003984	6004177	neuroPSI:1;readCounts:10153	950	+	6003984	6004177	0	2	50,50	0,143
chrIII	557586	565609	neuroPSI:0.238;readCounts:5	950	+	557586	565609	0	2	50,50	0,7973
chrIII	560123	565609	neuroPSI:0.762;readCounts:16	950	+	560123	565609	0	2	50,50	0,5436
chrIII	565604	567619	neuroPSI:1;readCounts:118	950	+	565604	567619	0	2	50,50	0,1965
chrIII	567687	571447	neuroPSI:1;readCounts:138	950	+	567687	571447	0	2	50,50	0,3710
chrIII	571465	572046	neuroPSI:1;readCounts:154	950	+	571465	572046	0	2	50,50	0,531
chrIII	7286659	7286801	neuroPSI:1;readCounts:10	950	-	7286659	7286801	0	2	50,50	0,92
chrIII	7286738	7287267	neuroPSI:1;readCounts:4619	950	-	7286738	7287267	0	2	50,50	0,479
chrIII	7287317	7287462	neuroPSI:1;readCounts:2180	950	-	7287317	7287462	0	2	50,50	0,95
chrIII	7278008	7278882	neuroPSI:1;readCounts:5	950	+	7278008	7278882	0	2	50,50	0,824
chrIII	7279053	7279203	neuroPSI:1;readCounts:36	950	+	7279053	7279203	0	2	50,50	0,100
chrIII	7279381	7279527	neuroPSI:1;readCounts:58	950	+	7279381	7279527	0	2	50,50	0,96
chrIII	7279559	7279969	neuroPSI:1;readCounts:54	950	+	7279559	7279969	0	2	50,50	0,360
chrIII	7279973	7280123	neuroPSI:1;readCounts:66	950	+	7279973	7280123	0	2	50,50	0,100
chrIII	7280183	7280711	neuroPSI:1;readCounts:107	950	+	7280183	7280711	0	2	50,50	0,478
chrIII	7280741	7280884	neuroPSI:1;readCounts:85	950	+	7280741	7280884	0	2	50,50	0,93
chrIII	7280874	7281018	neuroPSI:1;readCounts:104	950	+	7280874	7281018	0	2	50,50	0,94
chrIII	7293702	7293856	neuroPSI:1;readCounts:300	950	+	7293702	7293856	0	2	50,50	0,104
chrIII	7293921	7294102	neuroPSI:1;readCounts:429	950	+	7293921	7294102	0	2	50,50	0,131
chrIII	7294164	7294584	neuroPSI:1;readCounts:876	950	+	7294164	7294584	0	2	50,50	0,370
chrIII	7294601	7294871	neuroPSI:1;readCounts:968	950	+	7294601	7294871	0	2	50,50	0,220
chrIII	7294892	7296007	neuroPSI:0.004;readCounts:5	950	+	7294892	7296007	0	2	50,50	0,1065
chrIII	7294892	7296209	neuroPSI:0.01;readCounts:12	950	+	7294892	7296209	0	2	50,50	0,1267
chrIII	7294892	7301460	neuroPSI:0.985;readCounts:1128	950	+	7294892	7301460	0	2	50,50	0,6518
chrIII	7299718	7301460	neuroPSI:0.007;readCounts:8	950	+	7299718	7301460	0	2	50,50	0,1692
chrIII	7301455	7302847	neuroPSI:1;readCounts:1028	950	+	7301455	7302847	0	2	50,50	0,1342
chrIII	7302877	7304118	neuroPSI:1;readCounts:1308	950	+	7302877	7304118	0	2	50,50	0,1191
chrIII	7304161	7306027	neuroPSI:1;readCounts:1418	950	+	7304161	7306027	0	2	50,50	0,1816
chrIII	7306104	7308160	neuroPSI:1;readCounts:1699	950	+	7306104	7308160	0	2	50,50	0,2006
chrIII	7281583	7281728	neuroPSI:1;readCounts:47	950	+	7281583	7281728	0	2	50,50	0,95
chrIII	7281893	7282043	neuroPSI:1;readCounts:102	950	+	7281893	7282043	0	2	50,50	0,100
chrIII	7282097	7282264	neuroPSI:1;readCounts:171	950	+	7282097	7282264	0	2	50,50	0,117
chrIII	7282309	7282455	neuroPSI:1;readCounts:210	950	+	7282309	7282455	0	2	50,50	0,96
chrIII	7282506	7282658	neuroPSI:1;readCounts:233	950	+	7282506	7282658	0	2	50,50	0,102
chrIII	7282732	7282882	neuroPSI:1;readCounts:266	950	+	7282732	7282882	0	2	50,50	0,100
chrIII	7283163	7283340	neuroPSI:1;readCounts:683	950	+	7283163	7283340	0	2	50,50	0,127
chrIII	7283321	7283475	neuroPSI:1;readCounts:674	950	+	7283321	7283475	0	2	50,50	0,104
chrIII	7283469	7283616	neuroPSI:1;readCounts:722	950	+	7283469	7283616	0	2	50,50	0,97
chrIII	7259047	7264247	neuroPSI:1;readCounts:560	950	+	7259047	7264247	0	2	50,50	0,5150
chrIII	7264323	7265370	neuroPSI:0.989;readCounts:1090	950	+	7264323	7265370	0	2	50,50	0,997
chrIII	7264323	7266591	neuroPSI:0.006;readCounts:12	950	+	7264323	7266591	0	2	50,50	0,2218
chrIII	7265395	7266591	neuroPSI:0.919;readCounts:1847	950	+	7265395	7266591	0	2	50,50	0,1146
chrIII	7265395	7266975	neuroPSI:0.002;readCounts:6	950	+	7265395	7266975	0	2	50,50	0,1530
chrIII	7266327	7266591	neuroPSI:0.075;readCounts:150	950	+	7266327	7266591	0	2	50,50	0,214
chrIII	7266613	7266975	neuroPSI:0.996;readCounts:2496	950	+	7266613	7266975	0	2	50,50	0,312
chrIII	7266613	7267693	neuroPSI:0.002;readCounts:9	950	+	7266613	7267693	0	2	50,50	0,1030
chrIII	7267035	7267693	neuroPSI:0.998;readCounts:4207	950	+	7267035	7267693	0	2	50,50	0,608
chrIII	7267854	7268227	neuroPSI:1;readCounts:7371	950	+	7267854	7268227	0	2	50,50	0,323
chrIII	7268957	7269248	neuroPSI:1;readCounts:925	950	-	7268957	7269248	0	2	50,50	0,241
chrIII	7269678	7270307	neuroPSI:1;readCounts:329	950	-	7269678	7270307	0	2	50,50	0,579
chrIII	7270332	7270999	neuroPSI:0.232;readCounts:56	950	-	7270332	7270999	0	2	50,50	0,617
chrIII	7270332	7275100	neuroPSI:0.768;readCounts:185	950	-	7270332	7275100	0	2	50,50	0,4718
chrIII	7275109	7275370	neuroPSI:0.865;readCounts:90	950	-	7275109	7275370	0	2	50,50	0,211
chrIII	7275112	7275370	neuroPSI:0.135;readCounts:14	950	-	7275112	7275370	0	2	50,50	0,208
chrIII	7275864	7276059	neuroPSI:1;readCounts:991	950	-	7275864	7276059	0	2	50,50	0,145
chrIII	7276040	7276195	neuroPSI:1;readCounts:904	950	-	7276040	7276195	0	2	50,50	0,105
chrIII	7276210	7276415	neuroPSI:1;readCounts:956	950	-	7276210	7276415	0	2	50,50	0,155
chrIII	7276692	7276872	neuroPSI:1;readCounts:339	950	-	7276692	7276872	0	2	50,50	0,130
chrIII	7276935	7277086	neuroPSI:1;readCounts:223	950	-	7276935	7277086	0	2	50,50	0,101
chrIII	7277076	7277224	neuroPSI:1;readCounts:336	950	-	7277076	7277224	0	2	50,50	0,98
chrIII	7284202	7284349	neuroPSI:1;readCounts:752	950	-	7284202	7284349	0	2	50,50	0,97
chrIII	7284541	7284684	neuroPSI:1;readCounts:635	950	-	7284541	7284684	0	2	50,50	0,93
chrIII	7284797	7285144	neuroPSI:1;readCounts:361	950	-	7284797	7285144	0	2	50,50	0,297
chrIII	7285230	7285377	neuroPSI:1;readCounts:270	950	-	7285230	7285377	0	2	50,50	0,97
chrIII	7285424	7285586	neuroPSI:1;readCounts:250	950	-	7285424	7285586	0	2	50,50	0,112
chrIII	7285563	7285714	neuroPSI:1;readCounts:149	950	-	7285563	7285714	0	2	50,50	0,101
chrIII	7287942	7288321	neuroPSI:1;readCounts:1949	950	-	7287942	7288321	0	2	50,50	0,329
chrIII	7288503	7288653	neuroPSI:1;readCounts:1954	950	-	7288503	7288653	0	2	50,50	0,100
chrIII	7288820	7289186	neuroPSI:0.003;readCounts:5	950	-	7288820	7289186	0	2	50,50	0,316
chrIII	7288827	7289186	neuroPSI:0.997;readCounts:1531	950	-	7288827	7289186	0	2	50,50	0,309
chrIII	7289197	7289344	neuroPSI:1;readCounts:1291	950	-	7289197	7289344	0	2	50,50	0,97
chrIII	7289321	7289672	neuroPSI:1;readCounts:964	950	-	7289321	7289672	0	2	50,50	0,301
chrIII	7289867	7290079	neuroPSI:1;readCounts:517	950	-	7289867	7290079	0	2	50,50	0,162
chrIII	7290108	7290253	neuroPSI:1;readCounts:314	950	-	7290108	7290253	0	2	50,50	0,95
chrIII	7290249	7290485	neuroPSI:1;readCounts:280	950	-	7290249	7290485	0	2	50,50	0,186
chrIII	7298756	7298961	neuroPSI:1;readCounts:378	950	-	7298756	7298961	0	2	50,50	0,155
chrIII	7299191	7299394	neuroPSI:1;readCounts:161	950	-	7299191	7299394	0	2	50,50	0,153
chrV	13116496	13116644	neuroPSI:1;readCounts:12	950	+	13116496	13116644	0	2	50,50	0,98
chrV	13116946	13117090	neuroPSI:1;readCounts:42	950	+	13116946	13117090	0	2	50,50	0,94
chrV	13117917	13118063	neuroPSI:1;readCounts:82	950	+	13117917	13118063	0	2	50,50	0,96
chrV	13119220	13119365	neuroPSI:1;readCounts:823	950	+	13119220	13119365	0	2	50,50	0,95
chrV	13119565	13119715	neuroPSI:1;readCounts:1230	950	+	13119565	13119715	0	2	50,50	0,100
chrV	13126716	13126873	neuroPSI:1;readCounts:59296	950	-	13126716	13126873	0	2	50,50	0,107
chrV	13127006	13127158	neuroPSI:1;readCounts:30714	950	-	13127006	13127158	0	2	50,50	0,102
chrV	13128507	13128659	neuroPSI:1;readCounts:1465	950	-	13128507	13128659	0	2	50,50	0,102
chrV	13129630	13129920	neuroPSI:1;readCounts:245	950	-	13129630	13129920	0	2	50,50	0,240
chrV	13133836	13134088	neuroPSI:1;readCounts:151	950	-	13133836	13134088	0	2	50,50	0,202
chrV	13134127	13134276	neuroPSI:1;readCounts:141	950	-	13134127	13134276	0	2	50,50	0,99
chrV	13134263	13134774	neuroPSI:1;readCounts:124	950	-	13134263	13134774	0	2	50,50	0,461
chrV	13136596	13136865	neuroPSI:1;readCounts:34	950	-	13136596	13136865	0	2	50,50	0,219
chrV	13137364	13137772	neuroPSI:1;readCounts:18	950	-	13137364	13137772	0	2	50,50	0,358
chrV	13143066	13143206	neuroPSI:1;readCounts:6	950	+	13143066	13143206	0	2	50,50	0,90
chrV	13143819	13143975	neuroPSI:1;readCounts:5	950	+	13143819	13143975	0	2	50,50	0,106
chrV	13144355	13144500	neuroPSI:1;readCounts:6	950	+	13144355	13144500	0	2	50,50	0,95
chrV	13144683	13144838	neuroPSI:1;readCounts:12	950	+	13144683	13144838	0	2	50,50	0,105
chrV	13145041	13145197	neuroPSI:1;readCounts:17	950	+	13145041	13145197	0	2	50,50	0,106
chrV	13145196	13145341	neuroPSI:1;readCounts:23	950	+	13145196	13145341	0	2	50,50	0,95
chrV	13145480	13145623	neuroPSI:1;readCounts:23	950	+	13145480	13145623	0	2	50,50	0,93
chrV	13145629	13145849	neuroPSI:1;readCounts:22	950	+	13145629	13145849	0	2	50,50	0,170
chrV	13146048	13146193	neuroPSI:1;readCounts:6	950	+	13146048	13146193	0	2	50,50	0,95
chrV	13146647	13146973	neuroPSI:1;readCounts:5	950	+	13146647	13146973	0	2	50,50	0,276
chrV	13147773	13147917	neuroPSI:1;readCounts:13	950	+	13147773	13147917	0	2	50,50	0,94
chrV	13148756	13148905	neuroPSI:1;readCounts:6	950	+	13148756	13148905	0	2	50,50	0,99
chrV	13149069	13149230	neuroPSI:1;readCounts:10	950	+	13149069	13149230	0	2	50,50	0,111
chrV	13149436	13149586	neuroPSI:1;readCounts:23	950	+	13149436	13149586	0	2	50,50	0,100
chrV	13149721	13149868	neuroPSI:1;readCounts:21	950	+	13149721	13149868	0	2	50,50	0,97
chrV	13149899	13150045	neuroPSI:1;readCounts:10	950	+	13149899	13150045	0	2	50,50	0,96
chrV	13150092	13150236	neuroPSI:1;readCounts:6	950	+	13150092	13150236	0	2	50,50	0,94
chrV	13150276	13150491	neuroPSI:1;readCounts:40	950	+	13150276	13150491	0	2	50,50	0,165
chrV	13150601	13150743	neuroPSI:1;readCounts:25	950	+	13150601	13150743	0	2	50,50	0,92
chrV	13150821	13150991	neuroPSI:1;readCounts:49	950	+	13150821	13150991	0	2	50,50	0,120
chrV	13151350	13151739	neuroPSI:1;readCounts:64	950	+	13151350	13151739	0	2	50,50	0,339
chrV	13151809	13151952	neuroPSI:1;readCounts:87	950	+	13151809	13151952	0	2	50,50	0,93
[truncated: 104,328 more rows]

## Sheet: intestine_all
track name=intestine description='intestine_junctions'
chrII	2644	2787	gesPSI:1;readCounts:13	950	+	2644	2787	0	2	50,50	0,93
chrII	2838	2980	gesPSI:1;readCounts:6	950	+	2838	2980	0	2	50,50	0,92
chrII	2986	3455	gesPSI:1;readCounts:16	950	+	2986	3455	0	2	50,50	0,419
chrII	3502	3851	gesPSI:1;readCounts:25	950	+	3502	3851	0	2	50,50	0,299
chrII	3934	4250	gesPSI:1;readCounts:36	950	+	3934	4250	0	2	50,50	0,266
chrII	15268504	15269508	gesPSI:1;readCounts:153	950	+	15268504	15269508	0	2	50,50	0,954
chrII	15269744	15269909	gesPSI:1;readCounts:202	950	+	15269744	15269909	0	2	50,50	0,115
chrII	15269981	15270845	gesPSI:1;readCounts:183	950	+	15269981	15270845	0	2	50,50	0,814
chrII	15270923	15273092	gesPSI:0.424;readCounts:28	950	+	15270923	15273092	0	2	50,50	0,2119
chrII	15270923	15274429	gesPSI:0.576;readCounts:38	950	+	15270923	15274429	0	2	50,50	0,3456
chrII	15274466	15275078	gesPSI:1;readCounts:60	950	+	15274466	15275078	0	2	50,50	0,562
chrII	15275254	15275401	gesPSI:1;readCounts:15	950	+	15275254	15275401	0	2	50,50	0,97
chrIII	13780513	13780672	gesPSI:0.61;readCounts:306	950	+	13780513	13780672	0	2	50,50	0,109
chrIII	13780525	13780672	gesPSI:0.39;readCounts:196	950	+	13780525	13780672	0	2	50,50	0,97
chrIII	13780820	13780969	gesPSI:1;readCounts:659	950	+	13780820	13780969	0	2	50,50	0,99
chrIII	13782877	13783403	gesPSI:1;readCounts:14	950	+	13782877	13783403	0	2	50,50	0,476
chrIV	17487071	17487273	gesPSI:1;readCounts:202	950	-	17487071	17487273	0	2	50,50	0,152
chrIV	17487294	17487445	gesPSI:1;readCounts:211	950	-	17487294	17487445	0	2	50,50	0,101
chrIV	17487501	17488128	gesPSI:1;readCounts:233	950	-	17487501	17488128	0	2	50,50	0,577
chrIV	17488114	17488278	gesPSI:1;readCounts:123	950	-	17488114	17488278	0	2	50,50	0,114
chrIV	17488309	17488457	gesPSI:1;readCounts:135	950	-	17488309	17488457	0	2	50,50	0,98
chrIV	17488475	17489028	gesPSI:0.165;readCounts:16	950	-	17488475	17489028	0	2	50,50	0,503
chrIV	17488475	17489032	gesPSI:0.835;readCounts:81	950	-	17488475	17489032	0	2	50,50	0,507
chrIV	17489020	17489164	gesPSI:1;readCounts:59	950	-	17489020	17489164	0	2	50,50	0,94
chrIV	17489117	17490405	gesPSI:1;readCounts:80	950	-	17489117	17490405	0	2	50,50	0,1238
chrIV	17480439	17480582	gesPSI:1;readCounts:58	950	-	17480439	17480582	0	2	50,50	0,93
chrIV	17480559	17481211	gesPSI:1;readCounts:63	950	-	17480559	17481211	0	2	50,50	0,602
chrIV	17481541	17481686	gesPSI:1;readCounts:24	950	-	17481541	17481686	0	2	50,50	0,95
chrIV	17481859	17482013	gesPSI:1;readCounts:20	950	-	17481859	17482013	0	2	50,50	0,104
chrIV	17482029	17482358	gesPSI:1;readCounts:12	950	-	17482029	17482358	0	2	50,50	0,279
chrIV	17482311	17482458	gesPSI:1;readCounts:9	950	-	17482311	17482458	0	2	50,50	0,97
chrIV	17482467	17482983	gesPSI:1;readCounts:5	950	-	17482467	17482983	0	2	50,50	0,466
chrV	10384222	10384372	gesPSI:1;readCounts:26	950	+	10384222	10384372	0	2	50,50	0,100
chrV	10384425	10384574	gesPSI:1;readCounts:63	950	+	10384425	10384574	0	2	50,50	0,99
chrV	10384721	10384943	gesPSI:1;readCounts:110	950	+	10384721	10384943	0	2	50,50	0,172
chrV	10385436	10385646	gesPSI:1;readCounts:211	950	+	10385436	10385646	0	2	50,50	0,160
chrV	10379021	10379167	gesPSI:0.948;readCounts:163	950	-	10379021	10379167	0	2	50,50	0,96
chrV	10379021	10379244	gesPSI:0.052;readCounts:9	950	-	10379021	10379244	0	2	50,50	0,173
chrV	10379236	10379388	gesPSI:1;readCounts:100	950	-	10379236	10379388	0	2	50,50	0,102
chrV	10372515	10372660	gesPSI:1;readCounts:135	950	+	10372515	10372660	0	2	50,50	0,95
chrV	10372674	10372819	gesPSI:1;readCounts:210	950	+	10372674	10372819	0	2	50,50	0,95
chrV	10373036	10373185	gesPSI:1;readCounts:407	950	+	10373036	10373185	0	2	50,50	0,99
chrV	10373256	10373402	gesPSI:1;readCounts:1094	950	+	10373256	10373402	0	2	50,50	0,96
chrV	10373462	10373667	gesPSI:1;readCounts:958	950	+	10373462	10373667	0	2	50,50	0,155
chrV	10381599	10381781	gesPSI:1;readCounts:258	950	-	10381599	10381781	0	2	50,50	0,132
chrV	10382481	10382802	gesPSI:1;readCounts:195	950	+	10382481	10382802	0	2	50,50	0,271
chrV	10388533	10389327	gesPSI:1;readCounts:8	950	+	10388533	10389327	0	2	50,50	0,744
chrV	10389541	10389907	gesPSI:1;readCounts:14	950	+	10389541	10389907	0	2	50,50	0,316
chrV	10389927	10390226	gesPSI:1;readCounts:18	950	+	10389927	10390226	0	2	50,50	0,249
chrV	10390301	10390447	gesPSI:1;readCounts:25	950	+	10390301	10390447	0	2	50,50	0,96
chrV	10390808	10390958	gesPSI:1;readCounts:46	950	+	10390808	10390958	0	2	50,50	0,100
chrV	10390955	10391106	gesPSI:1;readCounts:51	950	+	10390955	10391106	0	2	50,50	0,101
chrV	10391127	10391303	gesPSI:1;readCounts:59	950	+	10391127	10391303	0	2	50,50	0,126
chrV	10391469	10391612	gesPSI:1;readCounts:93	950	+	10391469	10391612	0	2	50,50	0,93
chrV	10391713	10391855	gesPSI:1;readCounts:187	950	+	10391713	10391855	0	2	50,50	0,92
chrV	10392424	10392569	gesPSI:1;readCounts:627	950	+	10392424	10392569	0	2	50,50	0,95
chrV	10392690	10392835	gesPSI:1;readCounts:1213	950	+	10392690	10392835	0	2	50,50	0,95
chrV	10393648	10393804	gesPSI:1;readCounts:39	950	-	10393648	10393804	0	2	50,50	0,106
chrV	10394213	10394925	gesPSI:1;readCounts:33	950	-	10394213	10394925	0	2	50,50	0,662
chrV	10395808	10395976	gesPSI:1;readCounts:39	950	+	10395808	10395976	0	2	50,50	0,118
chrV	10395945	10396088	gesPSI:1;readCounts:42	950	+	10395945	10396088	0	2	50,50	0,93
chrV	10396105	10396251	gesPSI:1;readCounts:47	950	+	10396105	10396251	0	2	50,50	0,96
chrV	10396194	10396338	gesPSI:1;readCounts:56	950	+	10396194	10396338	0	2	50,50	0,94
chrV	10396436	10396631	gesPSI:1;readCounts:127	950	+	10396436	10396631	0	2	50,50	0,145
chrV	10396913	10397058	gesPSI:1;readCounts:723	950	+	10396913	10397058	0	2	50,50	0,95
chrV	10397098	10397241	gesPSI:1;readCounts:1239	950	+	10397098	10397241	0	2	50,50	0,93
chrV	10397460	10397606	gesPSI:1;readCounts:1205	950	+	10397460	10397606	0	2	50,50	0,96
chrV	10398912	10399059	gesPSI:1;readCounts:29	950	+	10398912	10399059	0	2	50,50	0,97
chrV	10399028	10399280	gesPSI:1;readCounts:32	950	+	10399028	10399280	0	2	50,50	0,202
chrV	10399294	10399441	gesPSI:1;readCounts:23	950	+	10399294	10399441	0	2	50,50	0,97
chrV	10399384	10399749	gesPSI:1;readCounts:39	950	+	10399384	10399749	0	2	50,50	0,315
chrV	10399739	10399882	gesPSI:1;readCounts:47	950	+	10399739	10399882	0	2	50,50	0,93
chrV	10399890	10400065	gesPSI:1;readCounts:106	950	+	10399890	10400065	0	2	50,50	0,125
chrV	10400347	10400493	gesPSI:1;readCounts:209	950	+	10400347	10400493	0	2	50,50	0,96
chrV	10400533	10400684	gesPSI:1;readCounts:242	950	+	10400533	10400684	0	2	50,50	0,101
chrV	10400670	10400818	gesPSI:1;readCounts:347	950	+	10400670	10400818	0	2	50,50	0,98
chrV	10400951	10401094	gesPSI:1;readCounts:489	950	+	10400951	10401094	0	2	50,50	0,93
chrIV	5113087	5113360	gesPSI:1;readCounts:58	950	-	5113087	5113360	0	2	50,50	0,223
chrIV	5113341	5113865	gesPSI:1;readCounts:29	950	-	5113341	5113865	0	2	50,50	0,474
chrIV	5113957	5114824	gesPSI:0.45;readCounts:9	950	-	5113957	5114824	0	2	50,50	0,817
chrIV	5114002	5114824	gesPSI:0.55;readCounts:11	950	-	5114002	5114824	0	2	50,50	0,772
chrIV	5114904	5115441	gesPSI:1;readCounts:9	950	-	5114904	5115441	0	2	50,50	0,487
chrIV	5115605	5117479	gesPSI:1;readCounts:14	950	-	5115605	5117479	0	2	50,50	0,1824
chrIV	5117482	5118714	gesPSI:1;readCounts:9	950	-	5117482	5118714	0	2	50,50	0,1182
chrIV	5118703	5121931	gesPSI:1;readCounts:10	950	-	5118703	5121931	0	2	50,50	0,3178
chrIV	5127572	5129076	gesPSI:1;readCounts:1257	950	-	5127572	5129076	0	2	50,50	0,1454
chrIV	5129327	5129798	gesPSI:1;readCounts:538	950	-	5129327	5129798	0	2	50,50	0,421
chrIV	5129918	5130482	gesPSI:1;readCounts:279	950	-	5129918	5130482	0	2	50,50	0,514
chrIV	5130585	5131348	gesPSI:1;readCounts:274	950	-	5130585	5131348	0	2	50,50	0,713
chrIV	5131465	5131812	gesPSI:1;readCounts:130	950	-	5131465	5131812	0	2	50,50	0,297
chrIV	5131865	5132154	gesPSI:1;readCounts:128	950	-	5131865	5132154	0	2	50,50	0,239
chrIV	5132186	5133637	gesPSI:1;readCounts:105	950	-	5132186	5133637	0	2	50,50	0,1401
chrIV	5111811	5111959	gesPSI:1;readCounts:108	950	+	5111811	5111959	0	2	50,50	0,98
chrIV	5111920	5112068	gesPSI:1;readCounts:152	950	+	5111920	5112068	0	2	50,50	0,98
chrIV	5112094	5112240	gesPSI:1;readCounts:171	950	+	5112094	5112240	0	2	50,50	0,96
chrIV	5112401	5112685	gesPSI:1;readCounts:302	950	+	5112401	5112685	0	2	50,50	0,234
chrX	242319	242465	gesPSI:1;readCounts:17	950	-	242319	242465	0	2	50,50	0,96
chrX	242619	243049	gesPSI:1;readCounts:12	950	-	242619	243049	0	2	50,50	0,380
chrX	246640	246785	gesPSI:1;readCounts:45	950	-	246640	246785	0	2	50,50	0,95
chrX	246861	247860	gesPSI:1;readCounts:12	950	-	246861	247860	0	2	50,50	0,949
chrX	251201	251939	gesPSI:1;readCounts:21	950	-	251201	251939	0	2	50,50	0,688
chrX	252559	252724	gesPSI:1;readCounts:5	950	-	252559	252724	0	2	50,50	0,115
chrX	237724	237879	gesPSI:1;readCounts:6	950	-	237724	237879	0	2	50,50	0,105
chrX	236535	236681	gesPSI:1;readCounts:8	950	-	236535	236681	0	2	50,50	0,96
chrX	240260	240405	gesPSI:1;readCounts:10	950	+	240260	240405	0	2	50,50	0,95
chrX	228308	228463	gesPSI:1;readCounts:6	950	-	228308	228463	0	2	50,50	0,105
chrX	227119	227265	gesPSI:1;readCounts:8	950	-	227119	227265	0	2	50,50	0,96
chrX	230844	230989	gesPSI:1;readCounts:10	950	+	230844	230989	0	2	50,50	0,95
chrX	232903	233049	gesPSI:1;readCounts:18	950	-	232903	233049	0	2	50,50	0,96
chrX	233203	233633	gesPSI:1;readCounts:12	950	-	233203	233633	0	2	50,50	0,380
chrV	14146517	14146698	gesPSI:1;readCounts:73	950	+	14146517	14146698	0	2	50,50	0,131
chrV	14146712	14146960	gesPSI:0.902;readCounts:83	950	+	14146712	14146960	0	2	50,50	0,198
chrV	14146751	14146960	gesPSI:0.098;readCounts:9	950	+	14146751	14146960	0	2	50,50	0,159
chrV	14146946	14147095	gesPSI:1;readCounts:146	950	+	14146946	14147095	0	2	50,50	0,99
chrV	14147120	14147268	gesPSI:1;readCounts:213	950	+	14147120	14147268	0	2	50,50	0,98
chrV	14147695	14147937	gesPSI:1;readCounts:570	950	+	14147695	14147937	0	2	50,50	0,192
chrV	14148140	14148288	gesPSI:1;readCounts:945	950	+	14148140	14148288	0	2	50,50	0,98
chrV	14137458	14137632	gesPSI:1;readCounts:40	950	-	14137458	14137632	0	2	50,50	0,124
chrII	9517828	9517997	gesPSI:1;readCounts:298	950	-	9517828	9517997	0	2	50,50	0,119
chrII	9518025	9518168	gesPSI:1;readCounts:302	950	-	9518025	9518168	0	2	50,50	0,93
chrII	9518154	9518300	gesPSI:1;readCounts:244	950	-	9518154	9518300	0	2	50,50	0,96
chrII	9518422	9518577	gesPSI:1;readCounts:212	950	-	9518422	9518577	0	2	50,50	0,105
chrII	9518698	9518850	gesPSI:1;readCounts:141	950	-	9518698	9518850	0	2	50,50	0,102
chrII	9519156	9519489	gesPSI:1;readCounts:328	950	+	9519156	9519489	0	2	50,50	0,283
chrII	9519569	9519713	gesPSI:1;readCounts:601	950	+	9519569	9519713	0	2	50,50	0,94
chrII	9519934	9520081	gesPSI:1;readCounts:662	950	+	9519934	9520081	0	2	50,50	0,97
chrII	9524259	9524406	gesPSI:1;readCounts:222	950	+	9524259	9524406	0	2	50,50	0,97
chrII	9524821	9524974	gesPSI:1;readCounts:291	950	+	9524821	9524974	0	2	50,50	0,103
chrII	9524980	9525122	gesPSI:1;readCounts:316	950	+	9524980	9525122	0	2	50,50	0,92
chrII	9525199	9525348	gesPSI:1;readCounts:493	950	+	9525199	9525348	0	2	50,50	0,99
chrII	9525389	9525540	gesPSI:1;readCounts:935	950	+	9525389	9525540	0	2	50,50	0,101
chrII	9525577	9525726	gesPSI:1;readCounts:1027	950	+	9525577	9525726	0	2	50,50	0,99
chrII	9525673	9525825	gesPSI:1;readCounts:6	950	+	9525673	9525825	0	2	50,50	0,102
chrX	2243606	2243758	gesPSI:1;readCounts:33	950	-	2243606	2243758	0	2	50,50	0,102
chrX	2243811	2244072	gesPSI:1;readCounts:14	950	-	2243811	2244072	0	2	50,50	0,211
chrX	2244038	2244185	gesPSI:1;readCounts:19	950	-	2244038	2244185	0	2	50,50	0,97
chrX	2244339	2244488	gesPSI:1;readCounts:6	950	-	2244339	2244488	0	2	50,50	0,99
chrX	2244716	2245407	gesPSI:1;readCounts:6	950	-	2244716	2245407	0	2	50,50	0,641
chrX	2256297	2257271	gesPSI:1;readCounts:334	950	-	2256297	2257271	0	2	50,50	0,924
chrX	2257330	2257487	gesPSI:1;readCounts:243	950	-	2257330	2257487	0	2	50,50	0,107
chrX	2257650	2257808	gesPSI:1;readCounts:77	950	-	2257650	2257808	0	2	50,50	0,108
chrX	2257787	2257935	gesPSI:1;readCounts:61	950	-	2257787	2257935	0	2	50,50	0,98
chrX	2257937	2258088	gesPSI:1;readCounts:50	950	-	2257937	2258088	0	2	50,50	0,101
chrX	2259374	2259535	gesPSI:1;readCounts:603	950	-	2259374	2259535	0	2	50,50	0,111
chrX	2259615	2260070	gesPSI:1;readCounts:692	950	-	2259615	2260070	0	2	50,50	0,405
chrX	2271344	2271703	gesPSI:1;readCounts:9	950	-	2271344	2271703	0	2	50,50	0,309
chrX	2272537	2272690	gesPSI:1;readCounts:7	950	-	2272537	2272690	0	2	50,50	0,103
chrX	2263474	2263928	gesPSI:1;readCounts:88	950	-	2263474	2263928	0	2	50,50	0,404
chrX	2263934	2264080	gesPSI:1;readCounts:101	950	-	2263934	2264080	0	2	50,50	0,96
chrX	2264046	2264207	gesPSI:1;readCounts:54	950	-	2264046	2264207	0	2	50,50	0,111
chrX	2264171	2264320	gesPSI:1;readCounts:151	950	-	2264171	2264320	0	2	50,50	0,99
chrX	2264292	2265496	gesPSI:1;readCounts:159	950	-	2264292	2265496	0	2	50,50	0,1154
chrX	2265536	2265689	gesPSI:1;readCounts:25	950	-	2265536	2265689	0	2	50,50	0,103
chrX	2265642	2265786	gesPSI:1;readCounts:39	950	-	2265642	2265786	0	2	50,50	0,94
chrX	2243141	2243553	gesPSI:1;readCounts:8	950	+	2243141	2243553	0	2	50,50	0,362
chrIV	12129588	12131996	gesPSI:1;readCounts:668	950	+	12129588	12131996	0	2	50,50	0,2358
chrIV	12132009	12132863	gesPSI:1;readCounts:991	950	+	12132009	12132863	0	2	50,50	0,804
chrIV	12132876	12133099	gesPSI:1;readCounts:936	950	+	12132876	12133099	0	2	50,50	0,173
chrIV	12133222	12134681	gesPSI:1;readCounts:1071	950	+	12133222	12134681	0	2	50,50	0,1409
chrIV	12134672	12134825	gesPSI:1;readCounts:1264	950	+	12134672	12134825	0	2	50,50	0,103
chrIV	12146786	12146942	gesPSI:0.991;readCounts:1612	950	-	12146786	12146942	0	2	50,50	0,106
chrIV	12146786	12146951	gesPSI:0.009;readCounts:14	950	-	12146786	12146951	0	2	50,50	0,115
chrIV	12147066	12147217	gesPSI:1;readCounts:66	950	-	12147066	12147217	0	2	50,50	0,101
chrIV	12147204	12147585	gesPSI:1;readCounts:732	950	-	12147204	12147585	0	2	50,50	0,331
chrIV	12147808	12147960	gesPSI:1;readCounts:580	950	-	12147808	12147960	0	2	50,50	0,102
chrIV	12147980	12148124	gesPSI:1;readCounts:536	950	-	12147980	12148124	0	2	50,50	0,94
chrIV	12148265	12148418	gesPSI:1;readCounts:274	950	-	12148265	12148418	0	2	50,50	0,103
chrIV	12148419	12149054	gesPSI:1;readCounts:244	950	-	12148419	12149054	0	2	50,50	0,585
chrIV	12149311	12149458	gesPSI:1;readCounts:160	950	-	12149311	12149458	0	2	50,50	0,97
chrIV	12150052	12150531	gesPSI:1;readCounts:34	950	-	12150052	12150531	0	2	50,50	0,429
chrIV	12150562	12150716	gesPSI:1;readCounts:23	950	-	12150562	12150716	0	2	50,50	0,104
chrIV	12150788	12150961	gesPSI:1;readCounts:17	950	-	12150788	12150961	0	2	50,50	0,123
chrIV	12143662	12143810	gesPSI:1;readCounts:866	950	-	12143662	12143810	0	2	50,50	0,98
chrIV	12143896	12144043	gesPSI:1;readCounts:474	950	-	12143896	12144043	0	2	50,50	0,97
chrIV	12144402	12144546	gesPSI:1;readCounts:314	950	-	12144402	12144546	0	2	50,50	0,94
chrIV	12144789	12144935	gesPSI:1;readCounts:213	950	-	12144789	12144935	0	2	50,50	0,96
chrIV	12145050	12145198	gesPSI:1;readCounts:56	950	-	12145050	12145198	0	2	50,50	0,98
chrIV	12145233	12145383	gesPSI:1;readCounts:78	950	-	12145233	12145383	0	2	50,50	0,100
chrIV	12145404	12145559	gesPSI:1;readCounts:76	950	-	12145404	12145559	0	2	50,50	0,105
chrIV	12145605	12145747	gesPSI:1;readCounts:46	950	-	12145605	12145747	0	2	50,50	0,92
chrIV	12135521	12136127	gesPSI:0.012;readCounts:11	950	-	12135521	12136127	0	2	50,50	0,556
chrIV	12135521	12136252	gesPSI:0.963;readCounts:891	950	-	12135521	12136252	0	2	50,50	0,681
chrIV	12135529	12136252	gesPSI:0.031;readCounts:29	950	-	12135529	12136252	0	2	50,50	0,673
chrIV	12136104	12136252	gesPSI:0.005;readCounts:5	950	-	12136104	12136252	0	2	50,50	0,98
chrIV	12136471	12136704	gesPSI:1;readCounts:554	950	-	12136471	12136704	0	2	50,50	0,183
chrIV	12136804	12137227	gesPSI:1;readCounts:384	950	-	12136804	12137227	0	2	50,50	0,373
chrIV	12137187	12137334	gesPSI:1;readCounts:366	950	-	12137187	12137334	0	2	50,50	0,97
chrIV	12141427	12141579	gesPSI:1;readCounts:969	950	-	12141427	12141579	0	2	50,50	0,102
chrIV	12142079	12142225	gesPSI:1;readCounts:254	950	-	12142079	12142225	0	2	50,50	0,96
chrIV	12142335	12142478	gesPSI:1;readCounts:207	950	-	12142335	12142478	0	2	50,50	0,93
chrIV	12142505	12142648	gesPSI:1;readCounts:139	950	-	12142505	12142648	0	2	50,50	0,93
chrIV	12142673	12142814	gesPSI:1;readCounts:119	950	-	12142673	12142814	0	2	50,50	0,91
chrIV	12142939	12143080	gesPSI:1;readCounts:76	950	-	12142939	12143080	0	2	50,50	0,91
chrIV	12143107	12143253	gesPSI:1;readCounts:50	950	-	12143107	12143253	0	2	50,50	0,96
chrIV	12156930	12159519	gesPSI:1;readCounts:25	950	+	12156930	12159519	0	2	50,50	0,2539
chrIV	12159501	12159648	gesPSI:1;readCounts:40	950	+	12159501	12159648	0	2	50,50	0,97
chrIV	12159610	12159755	gesPSI:1;readCounts:47	950	+	12159610	12159755	0	2	50,50	0,95
chrIV	12159824	12159980	gesPSI:1;readCounts:61	950	+	12159824	12159980	0	2	50,50	0,106
chrIV	12160006	12160597	gesPSI:1;readCounts:85	950	+	12160006	12160597	0	2	50,50	0,541
chrIV	12160604	12160752	gesPSI:1;readCounts:121	950	+	12160604	12160752	0	2	50,50	0,98
chrIV	12160782	12161604	gesPSI:1;readCounts:130	950	+	12160782	12161604	0	2	50,50	0,772
chrIV	12161586	12161736	gesPSI:1;readCounts:119	950	+	12161586	12161736	0	2	50,50	0,100
chrIV	12161940	12162116	gesPSI:1;readCounts:439	950	+	12161940	12162116	0	2	50,50	0,126
chrIV	12162193	12162343	gesPSI:1;readCounts:570	950	+	12162193	12162343	0	2	50,50	0,100
chrIV	12162369	12162857	gesPSI:0.012;readCounts:7	950	+	12162369	12162857	0	2	50,50	0,438
chrIV	12162369	12162863	gesPSI:0.988;readCounts:554	950	+	12162369	12162863	0	2	50,50	0,444
chrIV	12162823	12162971	gesPSI:1;readCounts:510	950	+	12162823	12162971	0	2	50,50	0,98
chrIV	12163003	12163631	gesPSI:1;readCounts:1014	950	+	12163003	12163631	0	2	50,50	0,578
chrIV	12163901	12164049	gesPSI:0.952;readCounts:1284	950	+	12163901	12164049	0	2	50,50	0,98
chrIV	12163901	12164054	gesPSI:0.048;readCounts:65	950	+	12163901	12164054	0	2	50,50	0,103
chrIV	12151406	12151558	gesPSI:1;readCounts:539	950	-	12151406	12151558	0	2	50,50	0,102
chrIV	12151597	12151752	gesPSI:1;readCounts:447	950	-	12151597	12151752	0	2	50,50	0,105
chrIV	12151718	12151864	gesPSI:1;readCounts:371	950	-	12151718	12151864	0	2	50,50	0,96
chrIV	12151875	12152021	gesPSI:1;readCounts:330	950	-	12151875	12152021	0	2	50,50	0,96
chrIV	12152088	12152237	gesPSI:1;readCounts:282	950	-	12152088	12152237	0	2	50,50	0,99
chrIV	12152219	12152371	gesPSI:1;readCounts:253	950	-	12152219	12152371	0	2	50,50	0,102
chrIV	12152465	12152697	gesPSI:0.529;readCounts:81	950	-	12152465	12152697	0	2	50,50	0,182
chrIV	12152477	12152697	gesPSI:0.471;readCounts:72	950	-	12152477	12152697	0	2	50,50	0,170
chrIV	12152895	12153044	gesPSI:1;readCounts:106	950	-	12152895	12153044	0	2	50,50	0,99
chrIV	12153280	12153439	gesPSI:1;readCounts:61	950	-	12153280	12153439	0	2	50,50	0,109
chrIV	12153594	12153740	gesPSI:1;readCounts:27	950	-	12153594	12153740	0	2	50,50	0,96
chrIV	12153706	12153850	gesPSI:1;readCounts:18	950	-	12153706	12153850	0	2	50,50	0,94
chrIV	12153909	12154052	gesPSI:1;readCounts:15	950	-	12153909	12154052	0	2	50,50	0,93
chrIV	12139097	12139256	gesPSI:0.844;readCounts:456	950	-	12139097	12139256	0	2	50,50	0,109
chrIV	12139103	12139256	gesPSI:0.156;readCounts:84	950	-	12139103	12139256	0	2	50,50	0,103
chrIV	12139254	12139409	gesPSI:0.008;readCounts:7	950	-	12139254	12139409	0	2	50,50	0,105
chrIV	12139264	12139409	gesPSI:0.992;readCounts:899	950	-	12139264	12139409	0	2	50,50	0,95
chrIV	12139525	12139674	gesPSI:1;readCounts:394	950	-	12139525	12139674	0	2	50,50	0,99
chrIV	12139711	12140028	gesPSI:0.029;readCounts:9	950	-	12139711	12140028	0	2	50,50	0,267
chrIV	12139711	12140074	gesPSI:0.971;readCounts:301	950	-	12139711	12140074	0	2	50,50	0,313
chrIV	12140422	12140570	gesPSI:1;readCounts:120	950	-	12140422	12140570	0	2	50,50	0,98
chrIV	12140668	12140814	gesPSI:1;readCounts:66	950	-	12140668	12140814	0	2	50,50	0,96
chrIV	12140841	12140984	gesPSI:1;readCounts:64	950	-	12140841	12140984	0	2	50,50	0,93
chrI	12759789	12760009	gesPSI:1;readCounts:601	950	-	12759789	12760009	0	2	50,50	0,170
chrI	12759974	12760287	gesPSI:1;readCounts:537	950	-	12759974	12760287	0	2	50,50	0,263
chrI	12760280	12760425	gesPSI:1;readCounts:572	950	-	12760280	12760425	0	2	50,50	0,95
chrI	12760455	12760894	gesPSI:1;readCounts:496	950	-	12760455	12760894	0	2	50,50	0,389
chrI	12760865	12761232	gesPSI:1;readCounts:397	950	-	12760865	12761232	0	2	50,50	0,317
chrI	12761477	12761859	gesPSI:1;readCounts:206	950	-	12761477	12761859	0	2	50,50	0,332
chrI	12761914	12762187	gesPSI:1;readCounts:139	950	-	12761914	12762187	0	2	50,50	0,223
chrI	12762229	12762708	gesPSI:1;readCounts:153	950	-	12762229	12762708	0	2	50,50	0,429
chrI	12762767	12763172	gesPSI:1;readCounts:114	950	-	12762767	12763172	0	2	50,50	0,355
chrI	12763210	12763508	gesPSI:1;readCounts:100	950	-	12763210	12763508	0	2	50,50	0,248
chrI	12763616	12763789	gesPSI:1;readCounts:80	950	-	12763616	12763789	0	2	50,50	0,123
chrI	12763843	12764039	gesPSI:1;readCounts:49	950	-	12763843	12764039	0	2	50,50	0,146
chrI	12764063	12764351	gesPSI:1;readCounts:35	950	-	12764063	12764351	0	2	50,50	0,238
chrI	12764432	12764872	gesPSI:1;readCounts:24	950	-	12764432	12764872	0	2	50,50	0,390
chrI	12773704	12774159	gesPSI:1;readCounts:12	950	+	12773704	12774159	0	2	50,50	0,405
chrI	12774288	12774830	gesPSI:1;readCounts:35	950	+	12774288	12774830	0	2	50,50	0,492
chrI	12775144	12775806	gesPSI:1;readCounts:84	950	+	12775144	12775806	0	2	50,50	0,612
chrI	12775817	12776453	gesPSI:1;readCounts:84	950	+	12775817	12776453	0	2	50,50	0,586
chrI	12776689	12777367	gesPSI:1;readCounts:148	950	+	12776689	12777367	0	2	50,50	0,628
chrI	12777378	12779151	gesPSI:1;readCounts:225	950	+	12777378	12779151	0	2	50,50	0,1723
chrI	12779171	12779334	gesPSI:1;readCounts:293	950	+	12779171	12779334	0	2	50,50	0,113
chrI	12779399	12780100	gesPSI:1;readCounts:306	950	+	12779399	12780100	0	2	50,50	0,651
chrI	12780069	12780297	gesPSI:1;readCounts:488	950	+	12780069	12780297	0	2	50,50	0,178
chrI	12780404	12781277	gesPSI:1;readCounts:567	950	+	12780404	12781277	0	2	50,50	0,823
chrI	12781234	12781586	gesPSI:1;readCounts:684	950	+	12781234	12781586	0	2	50,50	0,302
chrI	12781763	12782154	gesPSI:1;readCounts:501	950	+	12781763	12782154	0	2	50,50	0,341
chrI	12775765	12776441	gesPSI:0.5;readCounts:14	950	-	12775765	12776441	0	2	50,50	0,626
chrI	12775772	12776441	gesPSI:0.5;readCounts:14	950	-	12775772	12776441	0	2	50,50	0,619
chrV	10292520	10292745	gesPSI:1;readCounts:2197	950	-	10292520	10292745	0	2	50,50	0,175
chrV	10315850	10316004	gesPSI:1;readCounts:641	950	-	10315850	10316004	0	2	50,50	0,104
chrV	10316006	10316262	gesPSI:1;readCounts:536	950	-	10316006	10316262	0	2	50,50	0,206
chrV	10316489	10316641	gesPSI:1;readCounts:192	950	-	10316489	10316641	0	2	50,50	0,102
chrV	10316885	10317033	gesPSI:1;readCounts:108	950	-	10316885	10317033	0	2	50,50	0,98
chrV	10317884	10318028	gesPSI:1;readCounts:1854	950	-	10317884	10318028	0	2	50,50	0,94
chrV	10318379	10318524	gesPSI:1;readCounts:780	950	-	10318379	10318524	0	2	50,50	0,95
chrV	10318535	10318678	gesPSI:1;readCounts:649	950	-	10318535	10318678	0	2	50,50	0,93
chrV	10318865	10319010	gesPSI:1;readCounts:407	950	-	10318865	10319010	0	2	50,50	0,95
chrV	10319325	10319475	gesPSI:1;readCounts:144	950	-	10319325	10319475	0	2	50,50	0,100
chrV	10320867	10321017	gesPSI:1;readCounts:244	950	+	10320867	10321017	0	2	50,50	0,100
chrV	10321066	10321590	gesPSI:1;readCounts:487	950	+	10321066	10321590	0	2	50,50	0,474
chrV	10321682	10321828	gesPSI:0.981;readCounts:726	950	+	10321682	10321828	0	2	50,50	0,96
chrV	10321682	10321836	gesPSI:0.019;readCounts:14	950	+	10321682	10321836	0	2	50,50	0,104
chrV	10321994	10322142	gesPSI:1;readCounts:1202	950	+	10321994	10322142	0	2	50,50	0,98
chrV	10322618	10322768	gesPSI:1;readCounts:669	950	-	10322618	10322768	0	2	50,50	0,100
chrV	10322761	10322906	gesPSI:1;readCounts:995	950	-	10322761	10322906	0	2	50,50	0,95
chrV	10322928	10323075	gesPSI:0.986;readCounts:429	950	-	10322928	10323075	0	2	50,50	0,97
chrV	10322928	10323745	gesPSI:0.014;readCounts:6	950	-	10322928	10323745	0	2	50,50	0,767
chrV	10323166	10323311	gesPSI:1;readCounts:320	950	-	10323166	10323311	0	2	50,50	0,95
chrV	10323942	10324089	gesPSI:1;readCounts:230	950	-	10323942	10324089	0	2	50,50	0,97
chrV	10324159	10324307	gesPSI:1;readCounts:147	950	-	10324159	10324307	0	2	50,50	0,98
chrV	10324298	10324442	gesPSI:1;readCounts:92	950	-	10324298	10324442	0	2	50,50	0,94
chrV	10324488	10324635	gesPSI:1;readCounts:70	950	-	10324488	10324635	0	2	50,50	0,97
chrV	10324649	10324794	gesPSI:1;readCounts:84	950	-	10324649	10324794	0	2	50,50	0,95
chrV	10324980	10325149	gesPSI:1;readCounts:60	950	-	10324980	10325149	0	2	50,50	0,119
chrV	10325433	10325938	gesPSI:1;readCounts:44	950	-	10325433	10325938	0	2	50,50	0,455
chrV	10325950	10326355	gesPSI:1;readCounts:30	950	-	10325950	10326355	0	2	50,50	0,355
chrV	10326398	10331128	gesPSI:1;readCounts:31	950	-	10326398	10331128	0	2	50,50	0,4680
chrV	10331137	10331935	gesPSI:1;readCounts:8	950	-	10331137	10331935	0	2	50,50	0,748
chrV	10290631	10290786	gesPSI:1;readCounts:13	950	+	10290631	10290786	0	2	50,50	0,105
chrV	10290792	10290936	gesPSI:1;readCounts:11	950	+	10290792	10290936	0	2	50,50	0,94
chrV	10291171	10291312	gesPSI:1;readCounts:60	950	+	10291171	10291312	0	2	50,50	0,91
chrV	10291345	10291524	gesPSI:1;readCounts:48	950	+	10291345	10291524	0	2	50,50	0,129
chrV	10293924	10294078	gesPSI:1;readCounts:76	950	-	10293924	10294078	0	2	50,50	0,104
chrV	10294360	10294539	gesPSI:1;readCounts:860	950	-	10294360	10294539	0	2	50,50	0,129
chrV	10287731	10288195	gesPSI:1;readCounts:18	950	+	10287731	10288195	0	2	50,50	0,414
chrV	10288242	10288405	gesPSI:1;readCounts:25	950	+	10288242	10288405	0	2	50,50	0,113
chrV	10288423	10288883	gesPSI:1;readCounts:25	950	+	10288423	10288883	0	2	50,50	0,410
chrV	10288896	10289043	gesPSI:1;readCounts:32	950	+	10288896	10289043	0	2	50,50	0,97
chrV	10297742	10297885	gesPSI:1;readCounts:562	950	+	10297742	10297885	0	2	50,50	0,93
chrV	10298041	10298222	gesPSI:1;readCounts:1006	950	+	10298041	10298222	0	2	50,50	0,131
chrV	10298217	10298362	gesPSI:1;readCounts:1167	950	+	10298217	10298362	0	2	50,50	0,95
chrV	10298304	10298458	gesPSI:1;readCounts:34	950	+	10298304	10298458	0	2	50,50	0,104
chrV	10298571	10298736	gesPSI:1;readCounts:1906	950	+	10298571	10298736	0	2	50,50	0,115
chrV	10308466	10308620	gesPSI:1;readCounts:10	950	-	10308466	10308620	0	2	50,50	0,104
chrV	10299596	10299746	gesPSI:1;readCounts:46	950	-	10299596	10299746	0	2	50,50	0,100
chrV	10299792	10299938	gesPSI:1;readCounts:37	950	-	10299792	10299938	0	2	50,50	0,96
chrV	10300062	10300210	gesPSI:1;readCounts:15	950	-	10300062	10300210	0	2	50,50	0,98
chrV	10300433	10300618	gesPSI:1;readCounts:8	950	-	10300433	10300618	0	2	50,50	0,135
chrV	10300608	10300754	gesPSI:1;readCounts:11	950	-	10300608	10300754	0	2	50,50	0,96
chrV	10300847	10301027	gesPSI:1;readCounts:7	950	-	10300847	10301027	0	2	50,50	0,130
chrV	10301067	10301208	gesPSI:1;readCounts:5	950	-	10301067	10301208	0	2	50,50	0,91
chrV	10301231	10301377	gesPSI:1;readCounts:10	950	-	10301231	10301377	0	2	50,50	0,96
chrV	10301587	10301751	gesPSI:1;readCounts:6	950	-	10301587	10301751	0	2	50,50	0,114
chrV	10301746	10302768	gesPSI:1;readCounts:6	950	-	10301746	10302768	0	2	50,50	0,972
chrV	10314773	10314920	gesPSI:0.999;readCounts:6968	950	+	10314773	10314920	0	2	50,50	0,97
chrV	10314773	10315065	gesPSI:0;readCounts:5	950	+	10314773	10315065	0	2	50,50	0,242
chrV	10314910	10315065	gesPSI:1;readCounts:15362	950	+	10314910	10315065	0	2	50,50	0,105
chrI	6028599	6029208	gesPSI:1;readCounts:7	950	+	6028599	6029208	0	2	50,50	0,559
chrI	6030605	6031108	gesPSI:1;readCounts:172	950	+	6030605	6031108	0	2	50,50	0,453
chrI	6031594	6032236	gesPSI:1;readCounts:409	950	+	6031594	6032236	0	2	50,50	0,592
chrI	6032658	6033276	gesPSI:1;readCounts:2046	950	+	6032658	6033276	0	2	50,50	0,568
chrI	6022674	6023034	gesPSI:1;readCounts:318	950	+	6022674	6023034	0	2	50,50	0,310
chrI	6023190	6023654	gesPSI:1;readCounts:342	950	+	6023190	6023654	0	2	50,50	0,414
chrI	6023971	6025266	gesPSI:1;readCounts:930	950	+	6023971	6025266	0	2	50,50	0,1245
chrI	6025452	6025848	gesPSI:1;readCounts:1606	950	+	6025452	6025848	0	2	50,50	0,346
chrI	6026049	6026620	gesPSI:1;readCounts:3200	950	+	6026049	6026620	0	2	50,50	0,521
chrI	6027542	6028234	gesPSI:1;readCounts:955	950	+	6027542	6028234	0	2	50,50	0,642
chrI	6024217	6024383	gesPSI:1;readCounts:2655	950	-	6024217	6024383	0	2	50,50	0,116
chrI	6024369	6024885	gesPSI:1;readCounts:4366	950	-	6024369	6024885	0	2	50,50	0,466
chrII	5970103	5971014	gesPSI:1;readCounts:172	950	+	5970103	5971014	0	2	50,50	0,861
chrII	5971019	5971646	gesPSI:0.426;readCounts:69	950	+	5971019	5971646	0	2	50,50	0,577
chrII	5971070	5971646	gesPSI:0.574;readCounts:93	950	+	5971070	5971646	0	2	50,50	0,526
chrII	5971726	5972025	gesPSI:1;readCounts:211	950	+	5971726	5972025	0	2	50,50	0,249
chrII	5972051	5972253	gesPSI:1;readCounts:272	950	+	5972051	5972253	0	2	50,50	0,152
chrII	5945964	5946529	gesPSI:1;readCounts:1285	950	-	5945964	5946529	0	2	50,50	0,515
chrII	5946563	5946938	gesPSI:1;readCounts:1074	950	-	5946563	5946938	0	2	50,50	0,325
chrII	5946957	5947283	gesPSI:1;readCounts:465	950	-	5946957	5947283	0	2	50,50	0,276
chrII	5947265	5947518	gesPSI:0.02;readCounts:7	950	-	5947265	5947518	0	2	50,50	0,203
chrII	5947265	5948672	gesPSI:0.157;readCounts:55	950	-	5947265	5948672	0	2	50,50	0,1357
chrII	5947265	5951470	gesPSI:0.823;readCounts:289	950	-	5947265	5951470	0	2	50,50	0,4155
chrII	5951547	5953297	gesPSI:1;readCounts:175	950	-	5951547	5953297	0	2	50,50	0,1700
chrII	5953359	5953515	gesPSI:1;readCounts:159	950	-	5953359	5953515	0	2	50,50	0,106
chrII	5953564	5953714	gesPSI:1;readCounts:103	950	-	5953564	5953714	0	2	50,50	0,100
chrII	5954409	5954554	gesPSI:1;readCounts:32	950	-	5954409	5954554	0	2	50,50	0,95
chrII	5955346	5955670	gesPSI:1;readCounts:6	950	-	5955346	5955670	0	2	50,50	0,274
chrII	5968129	5968276	gesPSI:1;readCounts:120	950	-	5968129	5968276	0	2	50,50	0,97
chrII	5968445	5968590	gesPSI:1;readCounts:129	950	-	5968445	5968590	0	2	50,50	0,95
chrII	5968660	5968807	gesPSI:1;readCounts:74	950	-	5968660	5968807	0	2	50,50	0,97
chrII	5968775	5968919	gesPSI:1;readCounts:59	950	-	5968775	5968919	0	2	50,50	0,94
chrII	5968919	5969068	gesPSI:1;readCounts:23	950	-	5968919	5969068	0	2	50,50	0,99
chrII	5972916	5973171	gesPSI:1;readCounts:27	950	-	5972916	5973171	0	2	50,50	0,205
chrII	5973156	5973299	gesPSI:1;readCounts:41	950	-	5973156	5973299	0	2	50,50	0,93
chrII	5973321	5973475	gesPSI:1;readCounts:23	950	-	5973321	5973475	0	2	50,50	0,104
chrII	5973680	5974424	gesPSI:1;readCounts:5	950	-	5973680	5974424	0	2	50,50	0,694
chrII	5974422	5974570	gesPSI:1;readCounts:10	950	-	5974422	5974570	0	2	50,50	0,98
chrII	5974640	5974812	gesPSI:1;readCounts:7	950	-	5974640	5974812	0	2	50,50	0,122
chrII	5974804	5974961	gesPSI:1;readCounts:8	950	-	5974804	5974961	0	2	50,50	0,107
chrII	5961735	5961882	gesPSI:1;readCounts:303	950	+	5961735	5961882	0	2	50,50	0,97
chrIV	11310990	11311142	gesPSI:1;readCounts:845	950	+	11310990	11311142	0	2	50,50	0,102
chrIV	11311169	11311326	gesPSI:1;readCounts:2003	950	+	11311169	11311326	0	2	50,50	0,107
chrIV	11311452	11311601	gesPSI:1;readCounts:2044	950	+	11311452	11311601	0	2	50,50	0,99
chrIV	11311816	11311968	gesPSI:0.991;readCounts:2841	950	+	11311816	11311968	0	2	50,50	0,102
chrIV	11311816	11311992	gesPSI:0.009;readCounts:25	950	+	11311816	11311992	0	2	50,50	0,126
chrIV	11312008	11312209	gesPSI:1;readCounts:2985	950	+	11312008	11312209	0	2	50,50	0,151
chrIV	11327855	11328025	gesPSI:1;readCounts:3530	950	-	11327855	11328025	0	2	50,50	0,120
chrIV	11328256	11328408	gesPSI:1;readCounts:1016	950	-	11328256	11328408	0	2	50,50	0,102
chrIV	11328408	11328556	gesPSI:1;readCounts:569	950	-	11328408	11328556	0	2	50,50	0,98
chrIV	11328551	11328698	gesPSI:1;readCounts:570	950	-	11328551	11328698	0	2	50,50	0,97
chrIV	11328772	11328919	gesPSI:1;readCounts:439	950	-	11328772	11328919	0	2	50,50	0,97
chrIV	11329216	11329363	gesPSI:1;readCounts:176	950	-	11329216	11329363	0	2	50,50	0,97
chrIV	11329829	11329981	gesPSI:1;readCounts:1976	950	-	11329829	11329981	0	2	50,50	0,102
chrIV	11329962	11330114	gesPSI:1;readCounts:9	950	-	11329962	11330114	0	2	50,50	0,102
chrIV	11330176	11330325	gesPSI:1;readCounts:1023	950	-	11330176	11330325	0	2	50,50	0,99
chrIV	11330339	11330496	gesPSI:1;readCounts:847	950	-	11330339	11330496	0	2	50,50	0,107
chrIV	11330734	11330881	gesPSI:1;readCounts:448	950	-	11330734	11330881	0	2	50,50	0,97
chrIV	11331383	11331542	gesPSI:1;readCounts:104	950	-	11331383	11331542	0	2	50,50	0,109
chrIV	11331591	11331839	gesPSI:1;readCounts:89	950	-	11331591	11331839	0	2	50,50	0,198
chrIV	11332137	11332281	gesPSI:1;readCounts:29	950	-	11332137	11332281	0	2	50,50	0,94
chrIV	11332278	11332419	gesPSI:1;readCounts:23	950	-	11332278	11332419	0	2	50,50	0,91
chrIV	11332488	11332638	gesPSI:1;readCounts:20	950	-	11332488	11332638	0	2	50,50	0,100
chrIV	11332687	11332837	gesPSI:1;readCounts:21	950	-	11332687	11332837	0	2	50,50	0,100
chrIV	11304948	11305097	gesPSI:1;readCounts:3790	950	-	11304948	11305097	0	2	50,50	0,99
chrIV	11305430	11305950	gesPSI:1;readCounts:1918	950	-	11305430	11305950	0	2	50,50	0,470
chrIV	11305954	11306479	gesPSI:1;readCounts:1325	950	-	11305954	11306479	0	2	50,50	0,475
chrIV	11306492	11306677	gesPSI:1;readCounts:1328	950	-	11306492	11306677	0	2	50,50	0,135
chrIV	11299058	11299208	gesPSI:1;readCounts:162	950	+	11299058	11299208	0	2	50,50	0,100
chrIV	11299181	11300005	gesPSI:1;readCounts:191	950	+	11299181	11300005	0	2	50,50	0,774
chrIV	11300304	11300939	gesPSI:1;readCounts:546	950	+	11300304	11300939	0	2	50,50	0,585
chrIV	11300998	11301251	gesPSI:1;readCounts:652	950	+	11300998	11301251	0	2	50,50	0,203
chrIV	11301383	11303886	gesPSI:0.989;readCounts:1156	950	+	11301383	11303886	0	2	50,50	0,2453
chrIV	11301383	11304270	gesPSI:0.011;readCounts:13	950	+	11301383	11304270	0	2	50,50	0,2837
chrIV	11303950	11304270	gesPSI:0.989;readCounts:1178	950	+	11303950	11304270	0	2	50,50	0,270
chrIV	11297197	11297355	gesPSI:1;readCounts:3178	950	-	11297197	11297355	0	2	50,50	0,108
chrIV	11297318	11297477	gesPSI:1;readCounts:2139	950	-	11297318	11297477	0	2	50,50	0,109
chrIV	11297461	11297603	gesPSI:1;readCounts:1774	950	-	11297461	11297603	0	2	50,50	0,92
chrIV	11297618	11297762	gesPSI:1;readCounts:1084	950	-	11297618	11297762	0	2	50,50	0,94
chrIV	11297839	11297988	gesPSI:1;readCounts:843	950	-	11297839	11297988	0	2	50,50	0,99
chrIV	11298040	11298196	gesPSI:1;readCounts:1057	950	-	11298040	11298196	0	2	50,50	0,106
chrIV	11295173	11295379	gesPSI:1;readCounts:143	950	-	11295173	11295379	0	2	50,50	0,156
chrIV	11295498	11295643	gesPSI:1;readCounts:137	950	-	11295498	11295643	0	2	50,50	0,95
chrIV	11295777	11295927	gesPSI:1;readCounts:93	950	-	11295777	11295927	0	2	50,50	0,100
chrIV	11296000	11296146	gesPSI:1;readCounts:85	950	-	11296000	11296146	0	2	50,50	0,96
chrIV	11296231	11296374	gesPSI:1;readCounts:48	950	-	11296231	11296374	0	2	50,50	0,93
chrIV	11296399	11296832	gesPSI:0.058;readCounts:5	950	-	11296399	11296832	0	2	50,50	0,383
chrIV	11296417	11296832	gesPSI:0.942;readCounts:81	950	-	11296417	11296832	0	2	50,50	0,365
chrIV	11320418	11320569	gesPSI:1;readCounts:931	950	+	11320418	11320569	0	2	50,50	0,101
chrIV	11312849	11312995	gesPSI:1;readCounts:1933	950	-	11312849	11312995	0	2	50,50	0,96
chrIV	11313094	11313243	gesPSI:1;readCounts:1182	950	-	11313094	11313243	0	2	50,50	0,99
chrIV	11313241	11313388	gesPSI:0.992;readCounts:891	950	-	11313241	11313388	0	2	50,50	0,97
chrIV	11313248	11313388	gesPSI:0.008;readCounts:7	950	-	11313248	11313388	0	2	50,50	0,90
chrIV	11313487	11313631	gesPSI:1;readCounts:524	950	-	11313487	11313631	0	2	50,50	0,94
chrIV	11313745	11313908	gesPSI:1;readCounts:452	950	-	11313745	11313908	0	2	50,50	0,113
chrIV	11295483	11295633	gesPSI:1;readCounts:16	950	+	11295483	11295633	0	2	50,50	0,100
chrIV	11327409	11327555	gesPSI:1;readCounts:166	950	+	11327409	11327555	0	2	50,50	0,96
chrIV	11314368	11314515	gesPSI:1;readCounts:1838	950	-	11314368	11314515	0	2	50,50	0,97
chrIV	11314537	11314684	gesPSI:1;readCounts:1637	950	-	11314537	11314684	0	2	50,50	0,97
chrIV	11314819	11314971	gesPSI:0.042;readCounts:31	950	-	11314819	11314971	0	2	50,50	0,102
chrIV	11314824	11314971	gesPSI:0.958;readCounts:713	950	-	11314824	11314971	0	2	50,50	0,97
chrIV	11315244	11315394	gesPSI:1;readCounts:16867	950	+	11315244	11315394	0	2	50,50	0,100
chrIV	11315426	11315599	gesPSI:1;readCounts:15432	950	+	11315426	11315599	0	2	50,50	0,123
chrIV	11315547	11315710	gesPSI:1;readCounts:330	950	+	11315547	11315710	0	2	50,50	0,113
chrIV	11317496	11317649	gesPSI:1;readCounts:175	950	+	11317496	11317649	0	2	50,50	0,103
chrIV	11317756	11318272	gesPSI:1;readCounts:256	950	+	11317756	11318272	0	2	50,50	0,466
chrIV	11318248	11318392	gesPSI:1;readCounts:339	950	+	11318248	11318392	0	2	50,50	0,94
chrIV	11318545	11318703	gesPSI:1;readCounts:570	950	+	11318545	11318703	0	2	50,50	0,108
chrIV	11318905	11319066	gesPSI:1;readCounts:1663	950	+	11318905	11319066	0	2	50,50	0,111
chrIV	11319104	11319256	gesPSI:1;readCounts:2718	950	+	11319104	11319256	0	2	50,50	0,102
chrIV	11319358	11319509	gesPSI:1;readCounts:3117	950	+	11319358	11319509	0	2	50,50	0,101
chrIV	11319586	11319723	gesPSI:0.001;readCounts:6	950	+	11319586	11319723	0	2	50,50	0,87
chrIV	11319586	11319739	gesPSI:0.999;readCounts:4476	950	+	11319586	11319739	0	2	50,50	0,103
chrIV	11320839	11320989	gesPSI:1;readCounts:15	950	+	11320839	11320989	0	2	50,50	0,100
chrIV	11321002	11321151	gesPSI:1;readCounts:15	950	+	11321002	11321151	0	2	50,50	0,99
chrIV	11321322	11321466	gesPSI:1;readCounts:32	950	+	11321322	11321466	0	2	50,50	0,94
chrIV	11322632	11322838	gesPSI:1;readCounts:469	950	+	11322632	11322838	0	2	50,50	0,156
chrIV	11322922	11323081	gesPSI:1;readCounts:522	950	+	11322922	11323081	0	2	50,50	0,109
chrIV	11323203	11323346	gesPSI:1;readCounts:711	950	+	11323203	11323346	0	2	50,50	0,93
chrI	4664534	4664678	gesPSI:1;readCounts:125	950	+	4664534	4664678	0	2	50,50	0,94
chrI	4664732	4664884	gesPSI:1;readCounts:119	950	+	4664732	4664884	0	2	50,50	0,102
chrI	4664958	4665102	gesPSI:1;readCounts:156	950	+	4664958	4665102	0	2	50,50	0,94
chrI	4665103	4665248	gesPSI:1;readCounts:103	950	+	4665103	4665248	0	2	50,50	0,95
chrI	4661104	4661255	gesPSI:1;readCounts:132	950	-	4661104	4661255	0	2	50,50	0,101
chrI	4661332	4661812	gesPSI:1;readCounts:227	950	-	4661332	4661812	0	2	50,50	0,430
chrI	4661906	4662052	gesPSI:1;readCounts:142	950	-	4661906	4662052	0	2	50,50	0,96
chrI	4662029	4662180	gesPSI:1;readCounts:135	950	-	4662029	4662180	0	2	50,50	0,101
chrI	4653492	4653647	gesPSI:1;readCounts:63	950	+	4653492	4653647	0	2	50,50	0,105
chrI	4653636	4655398	gesPSI:1;readCounts:61	950	+	4653636	4655398	0	2	50,50	0,1712
chrI	4655446	4655770	gesPSI:1;readCounts:106	950	+	4655446	4655770	0	2	50,50	0,274
chrI	4656408	4656560	gesPSI:1;readCounts:383	950	+	4656408	4656560	0	2	50,50	0,102
chrI	4656730	4657255	gesPSI:0.236;readCounts:66	950	+	4656730	4657255	0	2	50,50	0,475
chrI	4656730	4657261	gesPSI:0.764;readCounts:214	950	+	4656730	4657261	0	2	50,50	0,481
chrI	4657377	4657988	gesPSI:0.094;readCounts:75	950	+	4657377	4657988	0	2	50,50	0,561
chrI	4657437	4657988	gesPSI:0.906;readCounts:726	950	+	4657437	4657988	0	2	50,50	0,501
chrI	4658205	4658734	gesPSI:1;readCounts:814	950	+	4658205	4658734	0	2	50,50	0,479
chrI	4658712	4659058	gesPSI:1;readCounts:1301	950	+	4658712	4659058	0	2	50,50	0,296
chrI	4644713	4645234	gesPSI:1;readCounts:163	950	+	4644713	4645234	0	2	50,50	0,471
chrI	4645254	4645402	gesPSI:1;readCounts:140	950	+	4645254	4645402	0	2	50,50	0,98
chrI	4646181	4646330	gesPSI:1;readCounts:89723	950	-	4646181	4646330	0	2	50,50	0,99
chrI	4646281	4646405	gesPSI:1;readCounts:2641	950	-	4646281	4646405	0	2	50,50	0,74
chrI	4646338	4646486	gesPSI:0;readCounts:5	950	-	4646338	4646486	0	2	50,50	0,98
chrI	4646338	4646490	gesPSI:1;readCounts:85161	950	-	4646338	4646490	0	2	50,50	0,102
chrI	4646533	4646962	gesPSI:1;readCounts:98	950	-	4646533	4646962	0	2	50,50	0,379
chrI	4646653	4646835	gesPSI:1;readCounts:50385	950	-	4646653	4646835	0	2	50,50	0,132
chrI	4648691	4648847	gesPSI:1;readCounts:1531	950	-	4648691	4648847	0	2	50,50	0,106
chrI	4649051	4649228	gesPSI:0.959;readCounts:728	950	-	4649051	4649228	0	2	50,50	0,127
chrI	4649051	4649660	gesPSI:0.041;readCounts:31	950	-	4649051	4649660	0	2	50,50	0,559
chrI	4649275	4649660	gesPSI:0.945;readCounts:530	950	-	4649275	4649660	0	2	50,50	0,335
chrI	4649692	4650298	gesPSI:1;readCounts:376	950	-	4649692	4650298	0	2	50,50	0,556
chrI	4650492	4650641	gesPSI:1;readCounts:204	950	-	4650492	4650641	0	2	50,50	0,99
chrI	4652273	4652619	gesPSI:1;readCounts:3690	950	-	4652273	4652619	0	2	50,50	0,296
chrI	4652651	4652803	gesPSI:1;readCounts:2812	950	-	4652651	4652803	0	2	50,50	0,102
chrI	4666245	4666450	gesPSI:1;readCounts:1179	950	-	4666245	4666450	0	2	50,50	0,155
chrI	4667149	4667767	gesPSI:1;readCounts:290	950	-	4667149	4667767	0	2	50,50	0,568
chrI	4667901	4668061	gesPSI:1;readCounts:253	950	-	4667901	4668061	0	2	50,50	0,110
chrI	4668659	4669276	gesPSI:1;readCounts:60	950	-	4668659	4669276	0	2	50,50	0,567
chrI	4669352	4669510	gesPSI:1;readCounts:37	950	-	4669352	4669510	0	2	50,50	0,108
chrI	4669689	4669841	gesPSI:1;readCounts:25	950	-	4669689	4669841	0	2	50,50	0,102
chrI	4670742	4670907	gesPSI:1;readCounts:100	950	-	4670742	4670907	0	2	50,50	0,115
chrI	4671374	4671528	gesPSI:1;readCounts:107	950	-	4671374	4671528	0	2	50,50	0,104
chrI	4671569	4671729	gesPSI:1;readCounts:26	950	-	4671569	4671729	0	2	50,50	0,110
chrI	4647515	4647662	gesPSI:1;readCounts:959	950	+	4647515	4647662	0	2	50,50	0,97
chrI	4647831	4647980	gesPSI:1;readCounts:1405	950	+	4647831	4647980	0	2	50,50	0,99
chrII	2040560	2040708	gesPSI:1;readCounts:46	950	-	2040560	2040708	0	2	50,50	0,98
chrII	2040760	2040911	gesPSI:1;readCounts:27	950	-	2040760	2040911	0	2	50,50	0,101
chrII	2040947	2041101	gesPSI:1;readCounts:40	950	-	2040947	2041101	0	2	50,50	0,104
chrII	2041398	2041552	gesPSI:1;readCounts:26	950	-	2041398	2041552	0	2	50,50	0,104
chrII	2043313	2043459	gesPSI:1;readCounts:57	950	-	2043313	2043459	0	2	50,50	0,96
chrII	2043511	2043662	gesPSI:1;readCounts:27	950	-	2043511	2043662	0	2	50,50	0,101
chrII	2043896	2044048	gesPSI:1;readCounts:23	950	-	2043896	2044048	0	2	50,50	0,102
chrII	2044807	2044956	gesPSI:1;readCounts:191	950	-	2044807	2044956	0	2	50,50	0,99
chrII	2045008	2045160	gesPSI:1;readCounts:148	950	-	2045008	2045160	0	2	50,50	0,102
chrII	2045208	2045362	gesPSI:1;readCounts:179	950	-	2045208	2045362	0	2	50,50	0,104
chrII	2048133	2048284	gesPSI:1;readCounts:44	950	-	2048133	2048284	0	2	50,50	0,101
chrII	2048336	2048489	gesPSI:1;readCounts:39	950	-	2048336	2048489	0	2	50,50	0,103
chrII	2048537	2048684	gesPSI:1;readCounts:46	950	-	2048537	2048684	0	2	50,50	0,97
chrII	2048969	2049116	gesPSI:1;readCounts:14	950	-	2048969	2049116	0	2	50,50	0,97
chrX	12032291	12032480	gesPSI:1;readCounts:44	950	-	12032291	12032480	0	2	50,50	0,139
chrX	12032485	12033065	gesPSI:1;readCounts:41	950	-	12032485	12033065	0	2	50,50	0,530
chrX	12033217	12033363	gesPSI:1;readCounts:18	950	-	12033217	12033363	0	2	50,50	0,96
chrX	12033449	12033965	gesPSI:1;readCounts:16	950	-	12033449	12033965	0	2	50,50	0,466
chrX	12028936	12029133	gesPSI:1;readCounts:8	950	+	12028936	12029133	0	2	50,50	0,147
chrX	12029121	12029897	gesPSI:1;readCounts:17	950	+	12029121	12029897	0	2	50,50	0,726
chrX	12029923	12030077	gesPSI:1;readCounts:15	950	+	12029923	12030077	0	2	50,50	0,104
chrX	12030319	12031043	gesPSI:1;readCounts:25	950	+	12030319	12031043	0	2	50,50	0,674
chrX	12031138	12031412	gesPSI:1;readCounts:36	950	+	12031138	12031412	0	2	50,50	0,224
chrX	12043083	12043237	gesPSI:1;readCounts:147	950	-	12043083	12043237	0	2	50,50	0,104
chrX	12043882	12044034	gesPSI:1;readCounts:31	950	-	12043882	12044034	0	2	50,50	0,102
chrX	12044157	12044331	gesPSI:1;readCounts:37	950	-	12044157	12044331	0	2	50,50	0,124
chrX	12044441	12044596	gesPSI:1;readCounts:10	950	-	12044441	12044596	0	2	50,50	0,105
chrX	12044556	12044737	gesPSI:1;readCounts:11	950	-	12044556	12044737	0	2	50,50	0,131
chrX	12044940	12045089	gesPSI:1;readCounts:7	950	-	12044940	12045089	0	2	50,50	0,99
chrX	12045225	12045374	gesPSI:1;readCounts:9	950	-	12045225	12045374	0	2	50,50	0,99
chrX	12045358	12045695	gesPSI:1;readCounts:7	950	-	12045358	12045695	0	2	50,50	0,287
chrX	12045758	12046230	gesPSI:1;readCounts:10	950	-	12045758	12046230	0	2	50,50	0,422
chrI	10713789	10713940	gesPSI:1;readCounts:816	950	-	10713789	10713940	0	2	50,50	0,101
chrI	10714053	10714201	gesPSI:1;readCounts:628	950	-	10714053	10714201	0	2	50,50	0,98
chrI	10714642	10714792	gesPSI:1;readCounts:205	950	-	10714642	10714792	0	2	50,50	0,100
chrI	10714806	10715038	gesPSI:1;readCounts:154	950	-	10714806	10715038	0	2	50,50	0,182
chrI	10715181	10715451	gesPSI:1;readCounts:159	950	-	10715181	10715451	0	2	50,50	0,220
chrI	10715465	10715610	gesPSI:1;readCounts:105	950	-	10715465	10715610	0	2	50,50	0,95
chrI	10715741	10716289	gesPSI:1;readCounts:75	950	-	10715741	10716289	0	2	50,50	0,498
chrI	10716303	10716448	gesPSI:1;readCounts:62	950	-	10716303	10716448	0	2	50,50	0,95
chrI	10716579	10716725	gesPSI:1;readCounts:41	950	-	10716579	10716725	0	2	50,50	0,96
chrI	10716739	10716891	gesPSI:1;readCounts:16	950	-	10716739	10716891	0	2	50,50	0,102
chrI	10716945	10717764	gesPSI:1;readCounts:5	950	-	10716945	10717764	0	2	50,50	0,769
chrI	10717692	10717849	gesPSI:1;readCounts:27	950	-	10717692	10717849	0	2	50,50	0,107
chrI	10717863	10718183	gesPSI:1;readCounts:49	950	-	10717863	10718183	0	2	50,50	0,270
chrI	10708376	10708850	gesPSI:1;readCounts:115	950	+	10708376	10708850	0	2	50,50	0,424
chrI	10709593	10709741	gesPSI:1;readCounts:3436	950	+	10709593	10709741	0	2	50,50	0,98
chrI	10710087	10710230	gesPSI:1;readCounts:2427	950	+	10710087	10710230	0	2	50,50	0,93
chrI	10710191	10710337	gesPSI:1;readCounts:2048	950	+	10710191	10710337	0	2	50,50	0,96
chrI	10732743	10732890	gesPSI:1;readCounts:3443	950	-	10732743	10732890	0	2	50,50	0,97
chrI	10733114	10733262	gesPSI:1;readCounts:2369	950	-	10733114	10733262	0	2	50,50	0,98
chrI	10733287	10733437	gesPSI:1;readCounts:1973	950	-	10733287	10733437	0	2	50,50	0,100
chrI	10733503	10733648	gesPSI:1;readCounts:1137	950	-	10733503	10733648	0	2	50,50	0,95
chrI	10730499	10730649	gesPSI:1;readCounts:4253	950	+	10730499	10730649	0	2	50,50	0,100
chrI	10727996	10728697	gesPSI:1;readCounts:4727	950	-	10727996	10728697	0	2	50,50	0,651
chrI	10726942	10727226	gesPSI:1;readCounts:1122	950	+	10726942	10727226	0	2	50,50	0,234
chrI	10731249	10731402	gesPSI:1;readCounts:4383	950	-	10731249	10731402	0	2	50,50	0,103
chrI	10731804	10732223	gesPSI:1;readCounts:1630	950	-	10731804	10732223	0	2	50,50	0,369
chrI	10732264	10732415	gesPSI:1;readCounts:1371	950	-	10732264	10732415	0	2	50,50	0,101
chrI	10741485	10741632	gesPSI:1;readCounts:134	950	-	10741485	10741632	0	2	50,50	0,97
chrI	10741666	10741808	gesPSI:1;readCounts:135	950	-	10741666	10741808	0	2	50,50	0,92
chrI	10741772	10741926	gesPSI:1;readCounts:114	950	-	10741772	10741926	0	2	50,50	0,104
chrI	10741975	10743025	gesPSI:1;readCounts:71	950	-	10741975	10743025	0	2	50,50	0,1000
chrI	10743037	10743201	gesPSI:0.31;readCounts:22	950	-	10743037	10743201	0	2	50,50	0,114
chrI	10743037	10743390	gesPSI:0.69;readCounts:49	950	-	10743037	10743390	0	2	50,50	0,303
chrI	10743449	10743594	gesPSI:1;readCounts:47	950	-	10743449	10743594	0	2	50,50	0,95
chrI	10743697	10743838	gesPSI:1;readCounts:13	950	-	10743697	10743838	0	2	50,50	0,91
chrI	10743864	10744179	gesPSI:1;readCounts:10	950	-	10743864	10744179	0	2	50,50	0,265
chrI	10744217	10744383	gesPSI:1;readCounts:8	950	-	10744217	10744383	0	2	50,50	0,116
chrI	10736767	10737372	gesPSI:1;readCounts:326	950	+	10736767	10737372	0	2	50,50	0,555
chrI	10737410	10737554	gesPSI:1;readCounts:448	950	+	10737410	10737554	0	2	50,50	0,94
chrI	10737574	10737846	gesPSI:1;readCounts:541	950	+	10737574	10737846	0	2	50,50	0,222
chrI	10737845	10737990	gesPSI:1;readCounts:681	950	+	10737845	10737990	0	2	50,50	0,95
chrI	10737984	10738236	gesPSI:1;readCounts:773	950	+	10737984	10738236	0	2	50,50	0,202
chrI	10738271	10738421	gesPSI:1;readCounts:1158	950	+	10738271	10738421	0	2	50,50	0,100
chrI	10738477	10739037	gesPSI:1;readCounts:2356	950	+	10738477	10739037	0	2	50,50	0,510
chrI	10739078	10739487	gesPSI:0.995;readCounts:2069	950	+	10739078	10739487	0	2	50,50	0,359
chrI	10739078	10739536	gesPSI:0.005;readCounts:11	950	+	10739078	10739536	0	2	50,50	0,408
chrI	10739554	10739704	gesPSI:1;readCounts:2970	950	+	10739554	10739704	0	2	50,50	0,100
chrI	10734027	10734370	gesPSI:1;readCounts:1680	950	+	10734027	10734370	0	2	50,50	0,293
chrI	10734441	10734600	gesPSI:1;readCounts:4966	950	+	10734441	10734600	0	2	50,50	0,109
chrI	10734628	10734777	gesPSI:0.998;readCounts:4921	950	+	10734628	10734777	0	2	50,50	0,99
chrI	10734632	10734777	gesPSI:0.002;readCounts:8	950	+	10734632	10734777	0	2	50,50	0,95
chrI	10734762	10734921	gesPSI:1;readCounts:4748	950	+	10734762	10734921	0	2	50,50	0,109
chrI	10735118	10735675	gesPSI:0.999;readCounts:10524	950	+	10735118	10735675	0	2	50,50	0,507
chrI	10735118	10735679	gesPSI:0.001;readCounts:14	950	+	10735118	10735679	0	2	50,50	0,511
chrI	10735700	10735855	gesPSI:1;readCounts:12117	950	+	10735700	10735855	0	2	50,50	0,105
chrI	10735837	10736134	gesPSI:1;readCounts:10554	950	+	10735837	10736134	0	2	50,50	0,247
chrI	10729000	10729824	gesPSI:1;readCounts:3256	950	-	10729000	10729824	0	2	50,50	0,774
chrI	10729754	10729908	gesPSI:1;readCounts:136	950	-	10729754	10729908	0	2	50,50	0,104
chrI	10729918	10730066	gesPSI:1;readCounts:4330	950	-	10729918	10730066	0	2	50,50	0,98
chrI	10730058	10730217	gesPSI:1;readCounts:3295	950	-	10730058	10730217	0	2	50,50	0,109
chrI	10720924	10721070	gesPSI:1;readCounts:44	950	+	10720924	10721070	0	2	50,50	0,96
chrI	10721084	10721243	gesPSI:1;readCounts:56	950	+	10721084	10721243	0	2	50,50	0,109
chrI	10721365	10722068	gesPSI:1;readCounts:72	950	+	10721365	10722068	0	2	50,50	0,653
chrI	10722082	10722232	gesPSI:1;readCounts:149	950	+	10722082	10722232	0	2	50,50	0,100
chrI	10722859	10723004	gesPSI:1;readCounts:524	950	+	10722859	10723004	0	2	50,50	0,95
chrI	10723117	10723265	gesPSI:1;readCounts:781	950	+	10723117	10723265	0	2	50,50	0,98
chrI	5965069	5965220	gesPSI:1;readCounts:10	950	+	5965069	5965220	0	2	50,50	0,101
chrI	5965350	5965492	gesPSI:1;readCounts:62	950	+	5965350	5965492	0	2	50,50	0,92
chrI	5965811	5965960	gesPSI:1;readCounts:69	950	+	5965811	5965960	0	2	50,50	0,99
chrI	5965951	5966098	gesPSI:1;readCounts:97	950	+	5965951	5966098	0	2	50,50	0,97
chrI	5966132	5966307	gesPSI:1;readCounts:150	950	+	5966132	5966307	0	2	50,50	0,125
chrI	5966430	5966577	gesPSI:1;readCounts:196	950	+	5966430	5966577	0	2	50,50	0,97
chrI	5966635	5966867	gesPSI:1;readCounts:221	950	+	5966635	5966867	0	2	50,50	0,182
chrI	5967020	5967167	gesPSI:1;readCounts:110	950	+	5967020	5967167	0	2	50,50	0,97
chrI	5959157	5959506	gesPSI:1;readCounts:74	950	-	5959157	5959506	0	2	50,50	0,299
chrI	5963051	5963226	gesPSI:1;readCounts:215	950	-	5963051	5963226	0	2	50,50	0,125
chrI	5963412	5963560	gesPSI:1;readCounts:164	950	-	5963412	5963560	0	2	50,50	0,98
chrI	5963535	5963682	gesPSI:1;readCounts:189	950	-	5963535	5963682	0	2	50,50	0,97
chrI	5963836	5964113	gesPSI:1;readCounts:114	950	-	5963836	5964113	0	2	50,50	0,227
chrI	5967405	5967554	gesPSI:1;readCounts:103	950	-	5967405	5967554	0	2	50,50	0,99
chrI	5967549	5967888	gesPSI:1;readCounts:117	950	-	5967549	5967888	0	2	50,50	0,289
chrI	5967901	5968181	gesPSI:1;readCounts:135	950	-	5967901	5968181	0	2	50,50	0,230
chrI	5968183	5968649	gesPSI:1;readCounts:125	950	-	5968183	5968649	0	2	50,50	0,416
chrI	5968654	5968860	gesPSI:1;readCounts:125	950	-	5968654	5968860	0	2	50,50	0,156
chrI	5968836	5969004	gesPSI:1;readCounts:88	950	-	5968836	5969004	0	2	50,50	0,118
chrI	5968953	5970352	gesPSI:0.725;readCounts:29	950	-	5968953	5970352	0	2	50,50	0,1349
chrI	5969102	5969251	gesPSI:1;readCounts:33	950	-	5969102	5969251	0	2	50,50	0,99
chrI	5969182	5969489	gesPSI:1;readCounts:36	950	-	5969182	5969489	0	2	50,50	0,257
chrI	5969524	5969668	gesPSI:1;readCounts:36	950	-	5969524	5969668	0	2	50,50	0,94
chrI	5969682	5969887	gesPSI:1;readCounts:33	950	-	5969682	5969887	0	2	50,50	0,155
chrI	5969864	5970042	gesPSI:1;readCounts:26	950	-	5969864	5970042	0	2	50,50	0,128
chrI	5970030	5970178	gesPSI:1;readCounts:11	950	-	5970030	5970178	0	2	50,50	0,98
chrI	5970143	5970352	gesPSI:0.275;readCounts:11	950	-	5970143	5970352	0	2	50,50	0,159
chrI	5970393	5970815	gesPSI:1;readCounts:34	950	-	5970393	5970815	0	2	50,50	0,372
chrI	5970798	5970951	gesPSI:1;readCounts:38	950	-	5970798	5970951	0	2	50,50	0,103
chrI	5970932	5971419	gesPSI:1;readCounts:31	950	-	5970932	5971419	0	2	50,50	0,437
chrI	5971408	5972632	gesPSI:1;readCounts:24	950	-	5971408	5972632	0	2	50,50	0,1174
chrI	5972693	5973213	gesPSI:1;readCounts:14	950	-	5972693	5973213	0	2	50,50	0,470
chrI	5955104	5955620	gesPSI:1;readCounts:25	950	+	5955104	5955620	0	2	50,50	0,466
chrI	5955609	5955754	gesPSI:1;readCounts:18	950	+	5955609	5955754	0	2	50,50	0,95
chrI	5955849	5956085	gesPSI:1;readCounts:25	950	+	5955849	5956085	0	2	50,50	0,186
chrI	5956072	5956678	gesPSI:1;readCounts:74	950	+	5956072	5956678	0	2	50,50	0,556
chrI	5956671	5956829	gesPSI:1;readCounts:28	950	+	5956671	5956829	0	2	50,50	0,108
chrI	5942899	5943758	gesPSI:1;readCounts:10	950	+	5942899	5943758	0	2	50,50	0,809
chrI	5943964	5944112	gesPSI:1;readCounts:8	950	+	5943964	5944112	0	2	50,50	0,98
chrI	5944141	5944398	gesPSI:1;readCounts:14	950	+	5944141	5944398	0	2	50,50	0,207
chrI	5944428	5944930	gesPSI:1;readCounts:7	950	+	5944428	5944930	0	2	50,50	0,452
chrI	5945029	5945355	gesPSI:1;readCounts:11	950	+	5945029	5945355	0	2	50,50	0,276
chrI	5945374	5945521	gesPSI:1;readCounts:5	950	+	5945374	5945521	0	2	50,50	0,97
chrI	5937501	5937650	gesPSI:1;readCounts:271	950	+	5937501	5937650	0	2	50,50	0,99
chrI	5937659	5937835	gesPSI:1;readCounts:302	950	+	5937659	5937835	0	2	50,50	0,126
chrI	5938103	5938266	gesPSI:1;readCounts:933	950	+	5938103	5938266	0	2	50,50	0,113
chrI	5938440	5938640	gesPSI:1;readCounts:2221	950	+	5938440	5938640	0	2	50,50	0,150
chrI	5934091	5934236	gesPSI:1;readCounts:9	950	+	5934091	5934236	0	2	50,50	0,95
chrI	5934271	5934622	gesPSI:1;readCounts:8	950	+	5934271	5934622	0	2	50,50	0,301
chrI	5934602	5935272	gesPSI:1;readCounts:8	950	+	5934602	5935272	0	2	50,50	0,620
chrI	5935827	5936254	gesPSI:1;readCounts:474	950	-	5935827	5936254	0	2	50,50	0,377
chrI	5936353	5936610	gesPSI:1;readCounts:258	950	-	5936353	5936610	0	2	50,50	0,207
chrI	5936618	5936835	gesPSI:0.943;readCounts:182	950	-	5936618	5936835	0	2	50,50	0,167
chrI	5936623	5936835	gesPSI:0.057;readCounts:11	950	-	5936623	5936835	0	2	50,50	0,162
chrI	5945662	5945806	gesPSI:1;readCounts:518	950	-	5945662	5945806	0	2	50,50	0,94
chrI	5945755	5945908	gesPSI:0.628;readCounts:438	950	-	5945755	5945908	0	2	50,50	0,103
chrI	5945763	5945908	gesPSI:0.372;readCounts:259	950	-	5945763	5945908	0	2	50,50	0,95
chrI	5946081	5946235	gesPSI:1;readCounts:441	950	-	5946081	5946235	0	2	50,50	0,104
chrI	5946257	5946406	gesPSI:1;readCounts:340	950	-	5946257	5946406	0	2	50,50	0,99
chrI	5946474	5946829	gesPSI:1;readCounts:241	950	-	5946474	5946829	0	2	50,50	0,305
chrI	5946987	5947140	gesPSI:1;readCounts:134	950	-	5946987	5947140	0	2	50,50	0,103
chrI	5947301	5947607	gesPSI:1;readCounts:64	950	-	5947301	5947607	0	2	50,50	0,256
chrI	5957636	5958050	gesPSI:1;readCounts:524	950	-	5957636	5958050	0	2	50,50	0,364
chrI	5958028	5958177	gesPSI:0.947;readCounts:341	950	-	5958028	5958177	0	2	50,50	0,99
chrI	5958028	5958359	gesPSI:0.053;readCounts:19	950	-	5958028	5958359	0	2	50,50	0,281
chrI	5958185	5958359	gesPSI:0.934;readCounts:269	950	-	5958185	5958359	0	2	50,50	0,124
chrI	5958309	5958452	gesPSI:1;readCounts:168	950	-	5958309	5958452	0	2	50,50	0,93
chrIV	3571064	3571430	gesPSI:1;readCounts:7	950	+	3571064	3571430	0	2	50,50	0,316
chrIV	3571387	3571541	gesPSI:1;readCounts:7	950	+	3571387	3571541	0	2	50,50	0,104
chrIV	3573629	3573840	gesPSI:1;readCounts:16	950	+	3573629	3573840	0	2	50,50	0,161
chrIV	3573845	3574128	gesPSI:1;readCounts:10	950	+	3573845	3574128	0	2	50,50	0,233
chrIV	3574167	3574316	gesPSI:1;readCounts:9	950	+	3574167	3574316	0	2	50,50	0,99
chrIV	3574487	3575042	gesPSI:1;readCounts:52	950	+	3574487	3575042	0	2	50,50	0,505
chrIV	3575118	3575303	gesPSI:1;readCounts:47	950	+	3575118	3575303	0	2	50,50	0,135
chrIV	3575290	3575564	gesPSI:1;readCounts:38	950	+	3575290	3575564	0	2	50,50	0,224
chrIV	3575664	3576099	gesPSI:1;readCounts:70	950	+	3575664	3576099	0	2	50,50	0,385
chrIV	3576242	3576932	gesPSI:1;readCounts:96	950	+	3576242	3576932	0	2	50,50	0,640
chrIV	3577007	3577504	gesPSI:1;readCounts:153	950	+	3577007	3577504	0	2	50,50	0,447
chrIV	3540280	3540425	gesPSI:1;readCounts:19	950	+	3540280	3540425	0	2	50,50	0,95
chrIV	3540439	3541150	gesPSI:1;readCounts:6	950	+	3540439	3541150	0	2	50,50	0,661
chrIV	3541472	3541803	gesPSI:1;readCounts:10	950	+	3541472	3541803	0	2	50,50	0,281
chrIV	3541964	3542106	gesPSI:1;readCounts:18	950	+	3541964	3542106	0	2	50,50	0,92
chrIV	3542120	3542265	gesPSI:1;readCounts:35	950	+	3542120	3542265	0	2	50,50	0,95
chrIV	3542898	3543044	gesPSI:1;readCounts:110	950	+	3542898	3543044	0	2	50,50	0,96
chrIV	3543157	3543518	gesPSI:0.927;readCounts:101	950	+	3543157	3543518	0	2	50,50	0,311
chrIV	3543288	3543518	gesPSI:0.073;readCounts:8	950	+	3543288	3543518	0	2	50,50	0,180
chrIV	3544019	3544466	gesPSI:1;readCounts:655	950	-	3544019	3544466	0	2	50,50	0,397
chrIV	3544501	3544806	gesPSI:1;readCounts:590	950	-	3544501	3544806	0	2	50,50	0,255
chrIV	3544838	3544987	gesPSI:1;readCounts:605	950	-	3544838	3544987	0	2	50,50	0,99
chrIV	3544981	3545132	gesPSI:1;readCounts:258	950	-	3544981	3545132	0	2	50,50	0,101
chrIV	3545155	3545612	gesPSI:1;readCounts:148	950	-	3545155	3545612	0	2	50,50	0,407
chrIV	3545651	3545798	gesPSI:1;readCounts:85	950	-	3545651	3545798	0	2	50,50	0,97
chrIV	3545796	3546187	gesPSI:1;readCounts:84	950	-	3545796	3546187	0	2	50,50	0,341
chrIV	3546183	3546496	gesPSI:0.071;readCounts:6	950	-	3546183	3546496	0	2	50,50	0,263
chrIV	3546183	3547564	gesPSI:0.929;readCounts:79	950	-	3546183	3547564	0	2	50,50	0,1331
chrIV	3551301	3551634	gesPSI:1;readCounts:16	950	-	3551301	3551634	0	2	50,50	0,283
chrIV	3551750	3552406	gesPSI:1;readCounts:7	950	-	3551750	3552406	0	2	50,50	0,606
chrIV	3552636	3553316	gesPSI:1;readCounts:23	950	-	3552636	3553316	0	2	50,50	0,630
chrV	3955850	3955998	gesPSI:1;readCounts:40	950	-	3955850	3955998	0	2	50,50	0,98
chrV	3956171	3956324	gesPSI:1;readCounts:5	950	-	3956171	3956324	0	2	50,50	0,103
chrV	3956435	3956579	gesPSI:1;readCounts:8	950	-	3956435	3956579	0	2	50,50	0,94
chrV	3956596	3956750	gesPSI:1;readCounts:5	950	-	3956596	3956750	0	2	50,50	0,104
chrV	3958320	3958463	gesPSI:1;readCounts:102	950	-	3958320	3958463	0	2	50,50	0,93
chrV	3958636	3958782	gesPSI:1;readCounts:11	950	-	3958636	3958782	0	2	50,50	0,96
chrV	3958893	3959485	gesPSI:1;readCounts:22	950	-	3958893	3959485	0	2	50,50	0,542
chrV	3959502	3959652	gesPSI:1;readCounts:20	950	-	3959502	3959652	0	2	50,50	0,100
chrV	3959858	3960019	gesPSI:1;readCounts:6	950	-	3959858	3960019	0	2	50,50	0,111
chrV	3962523	3962672	gesPSI:1;readCounts:11	950	-	3962523	3962672	0	2	50,50	0,99
chrV	3962689	3962841	gesPSI:1;readCounts:8	950	-	3962689	3962841	0	2	50,50	0,102
chrV	3964951	3965098	gesPSI:1;readCounts:355	950	-	3964951	3965098	0	2	50,50	0,97
chrV	3965271	3966631	gesPSI:1;readCounts:268	950	-	3965271	3966631	0	2	50,50	0,1310
chrV	3966742	3966887	gesPSI:1;readCounts:254	950	-	3966742	3966887	0	2	50,50	0,95
chrV	3966904	3967053	gesPSI:1;readCounts:230	950	-	3966904	3967053	0	2	50,50	0,99
chrV	3967635	3967777	gesPSI:1;readCounts:18	950	-	3967635	3967777	0	2	50,50	0,92
chrV	3968318	3968469	gesPSI:1;readCounts:556	950	-	3968318	3968469	0	2	50,50	0,101
chrV	3968642	3969125	gesPSI:1;readCounts:492	950	-	3968642	3969125	0	2	50,50	0,433
chrV	3969236	3969388	gesPSI:1;readCounts:165	950	-	3969236	3969388	0	2	50,50	0,102
chrV	3969405	3969557	gesPSI:1;readCounts:78	950	-	3969405	3969557	0	2	50,50	0,102
chrV	3969763	3970021	gesPSI:1;readCounts:24	950	-	3969763	3970021	0	2	50,50	0,208
chrV	3970297	3970452	gesPSI:1;readCounts:11	950	-	3970297	3970452	0	2	50,50	0,105
chrV	3970856	3971004	gesPSI:1;readCounts:43	950	-	3970856	3971004	0	2	50,50	0,98
chrV	3971177	3971808	gesPSI:1;readCounts:10	950	-	3971177	3971808	0	2	50,50	0,581
chrV	3971919	3972064	gesPSI:1;readCounts:8	950	-	3971919	3972064	0	2	50,50	0,95
chrV	3978947	3979093	gesPSI:1;readCounts:1752	950	-	3978947	3979093	0	2	50,50	0,96
chrV	3989452	3989629	gesPSI:1;readCounts:11130	950	+	3989452	3989629	0	2	50,50	0,127
chrV	3987974	3988156	gesPSI:1;readCounts:2059	950	+	3987974	3988156	0	2	50,50	0,132
chrV	3984487	3984629	gesPSI:0.002;readCounts:6	950	+	3984487	3984629	0	2	50,50	0,92
chrV	3984487	3984656	gesPSI:0.998;readCounts:2620	950	+	3984487	3984656	0	2	50,50	0,119
chrV	3982422	3982570	gesPSI:1;readCounts:5540	950	+	3982422	3982570	0	2	50,50	0,98
chrV	3982503	3982633	gesPSI:1;readCounts:7	950	+	3982503	3982633	0	2	50,50	0,80
chrV	3980218	3980435	gesPSI:1;readCounts:6622	950	+	3980218	3980435	0	2	50,50	0,167
chrIV	8159446	8159746	gesPSI:1;readCounts:82	950	+	8159446	8159746	0	2	50,50	0,250
chrIV	8160094	8160262	gesPSI:0.09;readCounts:18	950	+	8160094	8160262	0	2	50,50	0,118
chrIV	8160094	8160520	gesPSI:0.91;readCounts:181	950	+	8160094	8160520	0	2	50,50	0,376
chrIV	8160776	8160927	gesPSI:1;readCounts:617	950	+	8160776	8160927	0	2	50,50	0,101
chrIV	8161266	8161524	gesPSI:1;readCounts:1211	950	+	8161266	8161524	0	2	50,50	0,208
chrIV	8161613	8161779	gesPSI:0.982;readCounts:1878	950	+	8161613	8161779	0	2	50,50	0,116
chrIV	8161613	8161791	gesPSI:0.018;readCounts:35	950	+	8161613	8161791	0	2	50,50	0,128
chrIV	8152478	8152646	gesPSI:1;readCounts:97	950	+	8152478	8152646	0	2	50,50	0,118
chrIV	8152688	8153035	gesPSI:1;readCounts:135	950	+	8152688	8153035	0	2	50,50	0,297
chrIV	8153891	8154069	gesPSI:1;readCounts:1060	950	+	8153891	8154069	0	2	50,50	0,128
chrIV	8154300	8154498	gesPSI:1;readCounts:1520	950	+	8154300	8154498	0	2	50,50	0,148
chrIV	8148904	8149048	gesPSI:1;readCounts:30	950	+	8148904	8149048	0	2	50,50	0,94
chrIV	8149514	8149981	gesPSI:1;readCounts:135	950	+	8149514	8149981	0	2	50,50	0,417
chrIV	8150183	8150737	gesPSI:0.028;readCounts:13	950	+	8150183	8150737	0	2	50,50	0,504
chrIV	8150246	8150737	gesPSI:0.972;readCounts:458	950	+	8150246	8150737	0	2	50,50	0,441
chrIV	8155479	8155623	gesPSI:1;readCounts:298	950	-	8155479	8155623	0	2	50,50	0,94
chrIV	8155931	8156077	gesPSI:1;readCounts:213	950	-	8155931	8156077	0	2	50,50	0,96
chrIV	8162080	8162339	gesPSI:0.014;readCounts:69	950	-	8162080	8162339	0	2	50,50	0,209
chrIV	8162080	8162626	gesPSI:0.983;readCounts:4770	950	-	8162080	8162626	0	2	50,50	0,496
chrIV	8162479	8162626	gesPSI:0.017;readCounts:81	950	-	8162479	8162626	0	2	50,50	0,97
chrIV	8162646	8162797	gesPSI:1;readCounts:6584	950	-	8162646	8162797	0	2	50,50	0,101
chrIV	8162747	8162892	gesPSI:0.994;readCounts:6084	950	-	8162747	8162892	0	2	50,50	0,95
chrIV	8162747	8162896	gesPSI:0.006;readCounts:39	950	-	8162747	8162896	0	2	50,50	0,99
chrIV	8162898	8163048	gesPSI:1;readCounts:2596	950	-	8162898	8163048	0	2	50,50	0,100
chrIV	8163007	8163157	gesPSI:1;readCounts:2002	950	-	8163007	8163157	0	2	50,50	0,100
chrIV	8163446	8163731	gesPSI:1;readCounts:864	950	-	8163446	8163731	0	2	50,50	0,235
chrIV	8165007	8165204	gesPSI:1;readCounts:965	950	-	8165007	8165204	0	2	50,50	0,147
chrIV	8165407	8165556	gesPSI:1;readCounts:450	950	-	8165407	8165556	0	2	50,50	0,99
chrIV	8165516	8165855	gesPSI:1;readCounts:354	950	-	8165516	8165855	0	2	50,50	0,289
chrIV	8167261	8167487	gesPSI:1;readCounts:6861	950	-	8167261	8167487	0	2	50,50	0,176
chrIV	8167507	8167652	gesPSI:0.996;readCounts:5980	950	-	8167507	8167652	0	2	50,50	0,95
chrIV	8167507	8167657	gesPSI:0.004;readCounts:26	950	-	8167507	8167657	0	2	50,50	0,100
chrIV	8167602	8167964	gesPSI:1;readCounts:3862	950	-	8167602	8167964	0	2	50,50	0,312
chrIV	8167970	8168114	gesPSI:1;readCounts:1881	950	-	8167970	8168114	0	2	50,50	0,94
chrIV	8168073	8168217	gesPSI:1;readCounts:1729	950	-	8168073	8168217	0	2	50,50	0,94
chrIV	8168506	8168708	gesPSI:1;readCounts:421	950	-	8168506	8168708	0	2	50,50	0,152
chrV	9134454	9134598	gesPSI:1;readCounts:29	950	+	9134454	9134598	0	2	50,50	0,94
chrV	9134627	9134780	gesPSI:1;readCounts:32	950	+	9134627	9134780	0	2	50,50	0,103
chrV	9134786	9134934	gesPSI:1;readCounts:40	950	+	9134786	9134934	0	2	50,50	0,98
chrV	9134944	9135090	gesPSI:1;readCounts:32	950	+	9134944	9135090	0	2	50,50	0,96
chrV	9166113	9166264	gesPSI:1;readCounts:157	950	-	9166113	9166264	0	2	50,50	0,101
chrV	9166332	9166896	gesPSI:1;readCounts:87	950	-	9166332	9166896	0	2	50,50	0,514
chrV	9166952	9167115	gesPSI:1;readCounts:45	950	-	9166952	9167115	0	2	50,50	0,113
chrV	9167166	9167319	gesPSI:1;readCounts:32	950	-	9167166	9167319	0	2	50,50	0,103
chrV	9167294	9167499	gesPSI:1;readCounts:33	950	-	9167294	9167499	0	2	50,50	0,155
chrV	9167543	9167947	gesPSI:1;readCounts:16	950	-	9167543	9167947	0	2	50,50	0,354
chrV	9155705	9156465	gesPSI:1;readCounts:42	950	-	9155705	9156465	0	2	50,50	0,710
chrV	9156426	9156584	gesPSI:1;readCounts:47	950	-	9156426	9156584	0	2	50,50	0,108
chrV	9156545	9156698	gesPSI:1;readCounts:14	950	-	9156545	9156698	0	2	50,50	0,103
chrV	9139080	9139226	gesPSI:1;readCounts:126	950	-	9139080	9139226	0	2	50,50	0,96
chrV	9139232	9139373	gesPSI:0.068;readCounts:9	950	-	9139232	9139373	0	2	50,50	0,91
chrV	9139232	9139380	gesPSI:0.932;readCounts:124	950	-	9139232	9139380	0	2	50,50	0,98
chrV	9139481	9139630	gesPSI:1;readCounts:120	950	-	9139481	9139630	0	2	50,50	0,99
chrV	9139862	9140011	gesPSI:1;readCounts:66	950	-	9139862	9140011	0	2	50,50	0,99
chrV	9140031	9140176	gesPSI:1;readCounts:65	950	-	9140031	9140176	0	2	50,50	0,95
chrV	9140259	9140405	gesPSI:1;readCounts:46	950	-	9140259	9140405	0	2	50,50	0,96
chrV	9140446	9140854	gesPSI:1;readCounts:27	950	-	9140446	9140854	0	2	50,50	0,358
chrV	9140856	9141005	gesPSI:1;readCounts:16	950	-	9140856	9141005	0	2	50,50	0,99
chrV	9140980	9141129	gesPSI:1;readCounts:26	950	-	9140980	9141129	0	2	50,50	0,99
chrV	9141132	9141373	gesPSI:1;readCounts:29	950	-	9141132	9141373	0	2	50,50	0,191
chrV	9144929	9145088	gesPSI:1;readCounts:210	950	-	9144929	9145088	0	2	50,50	0,109
chrV	9145723	9145927	gesPSI:1;readCounts:42	950	-	9145723	9145927	0	2	50,50	0,154
chrV	9152852	9152995	gesPSI:1;readCounts:554	950	-	9152852	9152995	0	2	50,50	0,93
chrV	9153009	9153396	gesPSI:1;readCounts:504	950	-	9153009	9153396	0	2	50,50	0,337
chrV	9153389	9153711	gesPSI:1;readCounts:385	950	-	9153389	9153711	0	2	50,50	0,272
chrV	9153723	9153872	gesPSI:1;readCounts:313	950	-	9153723	9153872	0	2	50,50	0,99
chrV	9153918	9154063	gesPSI:1;readCounts:299	950	-	9153918	9154063	0	2	50,50	0,95
chrV	9154095	9154237	gesPSI:1;readCounts:219	950	-	9154095	9154237	0	2	50,50	0,92
chrV	9154221	9154379	gesPSI:1;readCounts:109	950	-	9154221	9154379	0	2	50,50	0,108
chrV	9154396	9154540	gesPSI:1;readCounts:88	950	-	9154396	9154540	0	2	50,50	0,94
chrV	9154499	9154839	gesPSI:1;readCounts:89	950	-	9154499	9154839	0	2	50,50	0,290
chrV	9159826	9159995	gesPSI:0.55;readCounts:55	950	-	9159826	9159995	0	2	50,50	0,119
chrV	9159835	9159995	gesPSI:0.1;readCounts:10	950	-	9159835	9159995	0	2	50,50	0,110
chrV	9159844	9159995	gesPSI:0.35;readCounts:35	950	-	9159844	9159995	0	2	50,50	0,101
chrV	9160418	9160566	gesPSI:0.999;readCounts:16806	950	-	9160418	9160566	0	2	50,50	0,98
chrV	9160418	9160578	gesPSI:0.001;readCounts:15	950	-	9160418	9160578	0	2	50,50	0,110
chrV	9162170	9162456	gesPSI:1;readCounts:22	950	-	9162170	9162456	0	2	50,50	0,236
chrV	9162774	9162928	gesPSI:1;readCounts:5932	950	-	9162774	9162928	0	2	50,50	0,104
chrV	9164433	9164656	gesPSI:0.041;readCounts:10	950	-	9164433	9164656	0	2	50,50	0,173
chrV	9164487	9164656	gesPSI:0.791;readCounts:193	950	-	9164487	9164656	0	2	50,50	0,119
chrV	9164505	9164656	gesPSI:0.168;readCounts:41	950	-	9164505	9164656	0	2	50,50	0,101
chrV	9165079	9165229	gesPSI:1;readCounts:20266	950	-	9165079	9165229	0	2	50,50	0,100
chrV	9168922	9169077	gesPSI:1;readCounts:771	950	-	9168922	9169077	0	2	50,50	0,105
chrV	9169210	9169356	gesPSI:1;readCounts:522	950	-	9169210	9169356	0	2	50,50	0,96
chrV	9169878	9170043	gesPSI:1;readCounts:77	950	-	9169878	9170043	0	2	50,50	0,115
chrV	9170113	9170258	gesPSI:1;readCounts:90	950	-	9170113	9170258	0	2	50,50	0,95
chrV	9170249	9170395	gesPSI:1;readCounts:86	950	-	9170249	9170395	0	2	50,50	0,96
chrV	9170600	9170743	gesPSI:1;readCounts:17	950	-	9170600	9170743	0	2	50,50	0,93
chrV	9170840	9170984	gesPSI:1;readCounts:21	950	-	9170840	9170984	0	2	50,50	0,94
chrV	9170984	9171128	gesPSI:1;readCounts:28	950	-	9170984	9171128	0	2	50,50	0,94
chrV	9171590	9171741	gesPSI:1;readCounts:5	950	-	9171590	9171741	0	2	50,50	0,101
chrV	9172092	9172236	gesPSI:1;readCounts:5	950	-	9172092	9172236	0	2	50,50	0,94
chrII	7756108	7756267	gesPSI:1;readCounts:315	950	+	7756108	7756267	0	2	50,50	0,109
chrII	7756247	7756397	gesPSI:1;readCounts:431	950	+	7756247	7756397	0	2	50,50	0,100
chrII	7756358	7756513	gesPSI:1;readCounts:483	950	+	7756358	7756513	0	2	50,50	0,105
chrII	7726380	7726631	gesPSI:1;readCounts:497	950	+	7726380	7726631	0	2	50,50	0,201
chrII	7726814	7727115	gesPSI:1;readCounts:65	950	+	7726814	7727115	0	2	50,50	0,251
chrII	7727139	7727286	gesPSI:1;readCounts:9	950	+	7727139	7727286	0	2	50,50	0,97
chrII	7727639	7727884	gesPSI:1;readCounts:6	950	+	7727639	7727884	0	2	50,50	0,195
chrII	7728152	7728300	gesPSI:1;readCounts:7	950	+	7728152	7728300	0	2	50,50	0,98
chrII	7728269	7728415	gesPSI:1;readCounts:5	950	+	7728269	7728415	0	2	50,50	0,96
chrII	7729851	7730077	gesPSI:1;readCounts:80	950	+	7729851	7730077	0	2	50,50	0,176
chrII	7730110	7730555	gesPSI:0.34;readCounts:36	950	+	7730110	7730555	0	2	50,50	0,395
chrII	7730110	7750329	gesPSI:0.66;readCounts:70	950	+	7730110	7750329	0	2	50,50	0,20169
chrII	7730719	7731004	gesPSI:1;readCounts:52	950	+	7730719	7731004	0	2	50,50	0,235
chrII	7750359	7750512	gesPSI:1;readCounts:529	950	+	7750359	7750512	0	2	50,50	0,103
chrII	7750491	7750665	gesPSI:1;readCounts:593	950	+	7750491	7750665	0	2	50,50	0,124
chrII	7750666	7750841	gesPSI:1;readCounts:554	950	+	7750666	7750841	0	2	50,50	0,125
chrII	7750847	7751122	gesPSI:0.024;readCounts:11	950	+	7750847	7751122	0	2	50,50	0,225
chrII	7750847	7751336	gesPSI:0.976;readCounts:442	950	+	7750847	7751336	0	2	50,50	0,439
chrII	7751368	7751521	gesPSI:1;readCounts:615	950	+	7751368	7751521	0	2	50,50	0,103
chrII	7751572	7751717	gesPSI:1;readCounts:902	950	+	7751572	7751717	0	2	50,50	0,95
chrII	7751692	7751839	gesPSI:1;readCounts:980	950	+	7751692	7751839	0	2	50,50	0,97
chrII	7751875	7752020	gesPSI:1;readCounts:1038	950	+	7751875	7752020	0	2	50,50	0,95
chrII	7752020	7752358	gesPSI:1;readCounts:1228	950	+	7752020	7752358	0	2	50,50	0,288
chrII	7753394	7753547	gesPSI:1;readCounts:9	950	-	7753394	7753547	0	2	50,50	0,103
chrII	7754717	7754882	gesPSI:1;readCounts:13	950	-	7754717	7754882	0	2	50,50	0,115
chrII	7754932	7755095	gesPSI:1;readCounts:18	950	-	7754932	7755095	0	2	50,50	0,113
chrII	7757258	7757404	gesPSI:1;readCounts:6628	950	-	7757258	7757404	0	2	50,50	0,96
chrII	7757511	7757659	gesPSI:1;readCounts:7666	950	-	7757511	7757659	0	2	50,50	0,98
chrII	7757712	7757859	gesPSI:1;readCounts:4457	950	-	7757712	7757859	0	2	50,50	0,97
chrII	7757862	7758008	gesPSI:1;readCounts:4256	950	-	7757862	7758008	0	2	50,50	0,96
chrII	7758002	7758151	gesPSI:1;readCounts:3365	950	-	7758002	7758151	0	2	50,50	0,99
chrII	7758162	7758310	gesPSI:1;readCounts:1291	950	-	7758162	7758310	0	2	50,50	0,98
chrII	7758340	7758555	gesPSI:1;readCounts:43	950	-	7758340	7758555	0	2	50,50	0,165
chrV	5240999	5241294	gesPSI:1;readCounts:643	950	-	5240999	5241294	0	2	50,50	0,245
chrV	5241460	5241628	gesPSI:1;readCounts:341	950	-	5241460	5241628	0	2	50,50	0,118
chrV	5241692	5241840	gesPSI:1;readCounts:268	950	-	5241692	5241840	0	2	50,50	0,98
chrV	5241950	5242111	gesPSI:1;readCounts:38	950	-	5241950	5242111	0	2	50,50	0,111
chrV	5242134	5242276	gesPSI:1;readCounts:6	950	-	5242134	5242276	0	2	50,50	0,92
[truncated: 92,063 more rows]

## Sheet: muscle_all
track name=muscle description='muscle_junctions'
[truncated: 70,326 more rows]

## Sheet: dopaminergic_all
track name=dopaminergic description='dopaminergic_junctions'
[truncated: 99,511 more rows]

[truncated: 1 more sheets: serotonergic_all]
