# Supplementary material for: Global regulatory features of alternative splicing across tissues and within the nervous system of C. elegans
Source: Genome Res. 2020 Dec;30(12):1766–80. doi: 10.1101/gr.267328.120 (PMC7706725; doi:10.1101/gr.267328.120)
Supplement: Supplemental Material [file supp_gr.267328.120_Supplemental_Table_S2.xlsx]

## Sheet: Legend
Supplemental Table S2: Spreadsheet summarizing results of our two-color splicing reporter validation experiments.

## Sheet: data
alternative exon	splicing class	pair-wise tissue comparison	pattern consistent with TRAP-seq data
zoo-1 exon 9	cassette event	neurons vs. muscle	Yes
ampd-1 exon 15	cassette event	neurons vs. muscle	Yes
hlb-1 exon 12	alternative 5' splice site selection	neurons vs. muscle	Yes
fhod-1 exon 8	cassette event	muscle vs. intestine	Yes
adr-1 exon 7	alternative 3' splice site selection	dopaminergic vs. serotonergic	Yes
rbc-1 exon 30	cassette event	dopaminergic vs. serotonergic	No
unc-77 exon 26	cassette event	dopaminergic vs. serotonergic	No
Y60A3A.21 exon 3/4	alternative terminal exon	dopaminergic vs. serotonergic	Yes
cdgs-1 exon 2	cassette event	pan-neuronal vs. dopaminergic/serotonergic	No
mlk-1 exon 11	cassette event	pan-neuronal vs. dopaminergic/serotonergic	Yes
C07A12.7 exon 4	cassette event	pan-neuronal vs. dopaminergic/serotonergic	Yes
scd-1 exon 5	alternative 3' splice site selection	pan-neuronal vs. dopaminergic/serotonergic	Yes
cccp-1 exon 12	cassette event	pan-neuronal vs. dopaminergic/serotonergic	Yes
ehbp-1 exon 8	cassette event	pan-neuronal vs. dopaminergic/serotonergic	Yes
