# Supplementary material for: Global regulatory features of alternative splicing across tissues and within the nervous system of C. elegans
Source: Genome Res. 2020 Dec;30(12):1766–80. doi: 10.1101/gr.267328.120 (PMC7706725; doi:10.1101/gr.267328.120)
Supplement: Supplemental Material [file supp_gr.267328.120_Supplemental_Table_S3.xlsx]

## Sheet: Legend
Supplemental Table S3: Spreadsheet with alternative junctions and tissue-regulated junctions separated by splicing class (cassette, alternative splice site selection, alternative start/terminal exon usage, mutually exclusive splicing, intron retention, complex).

## Sheet: Muscle_AltSplicing
Muscle: alternative splicing events
Cassette
track name=myo_cassette description='myo_cassette'
chrV	38219	40503	myoPSI:0.42731025	950	+	38219	40503	0	2	50,50	0,2234
chrV	38219	39040	myoPSI:0.57268975	950	+	38219	39040	0	2	50,50	0,771
chrV	38976	40503	myoPSI:0.58750000	950	+	38976	40503	0	2	50,50	0,1477
chrII	96757	97108	myoPSI:0.79939224	950	-	96757	97108	0	2	50,50	0,301
chrII	96959	97108	myoPSI:0.20060776	950	-	96959	97108	0	2	50,50	0,99
chrII	96757	96930	myoPSI:0.14152160	950	-	96757	96930	0	2	50,50	0,123
chrII	167028	167953	myoPSI:0.14675912	950	+	167028	167953	0	2	50,50	0,875
chrII	167028	167223	myoPSI:0.85324088	950	+	167028	167223	0	2	50,50	0,145
chrII	167336	167953	myoPSI:0.91375518	950	+	167336	167953	0	2	50,50	0,567
chrII	223747	227985	myoPSI:0.76861135	950	-	223747	227985	0	2	50,50	0,4188
chrII	226724	227985	myoPSI:0.23138865	950	-	226724	227985	0	2	50,50	0,1211
chrII	223747	226663	myoPSI:0.32835922	950	-	223747	226663	0	2	50,50	0,2866
chrV	277319	278224	myoPSI:0.30381654	950	-	277319	278224	0	2	50,50	0,855
chrV	277990	278224	myoPSI:0.69618346	950	-	277990	278224	0	2	50,50	0,184
chrV	277319	278016	myoPSI:0.68621844	950	-	277319	278016	0	2	50,50	0,647
chrIII	345808	346338	myoPSI:0.82886905	950	-	345808	346338	0	2	50,50	0,480
chrIII	346059	346338	myoPSI:0.17113095	950	-	346059	346338	0	2	50,50	0,229
chrIII	345808	346072	myoPSI:0.23732492	950	-	345808	346072	0	2	50,50	0,214
chrI	590296	591584	myoPSI:0.79255414	950	-	590296	591584	0	2	50,50	0,1238
chrI	591254	591584	myoPSI:0.20744586	950	-	591254	591584	0	2	50,50	0,280
chrI	590296	591315	myoPSI:0.18000000	950	-	590296	591315	0	2	50,50	0,969
chrX	722228	722385	myoPSI:0.42381327	950	-	722228	722385	0	2	50,50	0,107
chrX	720873	722385	myoPSI:0.57618673	950	-	720873	722385	0	2	50,50	0,1462
chrX	720873	722202	myoPSI:0.36536714	950	-	720873	722202	0	2	50,50	0,1279
chrIV	751238	751430	myoPSI:0.32944444	950	+	751238	751430	0	2	50,50	0,142
chrIV	751238	751632	myoPSI:0.67055556	950	+	751238	751632	0	2	50,50	0,344
chrIV	751384	751632	myoPSI:0.35172660	950	+	751384	751632	0	2	50,50	0,198
chrIII	882008	883640	myoPSI:0.43924193	950	-	882008	883640	0	2	50,50	0,1582
chrIII	882162	883640	myoPSI:0.56075807	950	-	882162	883640	0	2	50,50	0,1428
chrIII	882008	882155	myoPSI:0.59439741	950	-	882008	882155	0	2	50,50	0,97
chrX	2285601	2285892	myoPSI:0.22796935	950	-	2285601	2285892	0	2	50,50	0,241
chrX	2285476	2285892	myoPSI:0.77203065	950	-	2285476	2285892	0	2	50,50	0,366
chrX	2285476	2285619	myoPSI:0.19976260	950	-	2285476	2285619	0	2	50,50	0,93
chrIV	2712604	2712944	myoPSI:0.90825421	950	-	2712604	2712944	0	2	50,50	0,290
chrIV	2712125	2712944	myoPSI:0.09174579	950	-	2712125	2712944	0	2	50,50	0,769
chrIV	2712125	2712640	myoPSI:0.91876666	950	-	2712125	2712640	0	2	50,50	0,465
chrIV	3240399	3243504	myoPSI:0.25740741	950	+	3240399	3243504	0	2	50,50	0,3055
chrIV	3240399	3241606	myoPSI:0.74259259	950	+	3240399	3241606	0	2	50,50	0,1157
chrIV	3241566	3243504	myoPSI:0.74886437	950	+	3241566	3243504	0	2	50,50	0,1888
chrX	3801557	3801914	myoPSI:0.75082579	950	-	3801557	3801914	0	2	50,50	0,307
chrX	3801736	3801914	myoPSI:0.24917421	950	-	3801736	3801914	0	2	50,50	0,128
chrX	3801557	3801797	myoPSI:0.24083040	950	-	3801557	3801797	0	2	50,50	0,190
chrIV	4018111	4018536	myoPSI:0.21268185	950	-	4018111	4018536	0	2	50,50	0,375
chrIV	4018281	4018536	myoPSI:0.78731815	950	-	4018281	4018536	0	2	50,50	0,205
chrIV	4018111	4018306	myoPSI:0.72821682	950	-	4018111	4018306	0	2	50,50	0,145
chrX	4058211	4059173	myoPSI:0.59233600	950	-	4058211	4059173	0	2	50,50	0,912
chrX	4058783	4059173	myoPSI:0.40766400	950	-	4058783	4059173	0	2	50,50	0,340
chrX	4058211	4058861	myoPSI:0.47500000	950	-	4058211	4058861	0	2	50,50	0,600
chrIV	4178506	4179312	myoPSI:0.36189381	950	+	4178506	4179312	0	2	50,50	0,756
chrIV	4178506	4178785	myoPSI:0.63810619	950	+	4178506	4178785	0	2	50,50	0,229
chrIV	4178959	4179312	myoPSI:0.67923920	950	+	4178959	4179312	0	2	50,50	0,303
chrIII	5011266	5011522	myoPSI:0.67195148	950	-	5011266	5011522	0	2	50,50	0,206
chrIII	5010939	5011522	myoPSI:0.32804852	950	-	5010939	5011522	0	2	50,50	0,533
chrIII	5010939	5011189	myoPSI:0.74559597	950	-	5010939	5011189	0	2	50,50	0,200
chrIII	5019485	5019894	myoPSI:0.44027778	950	+	5019485	5019894	0	2	50,50	0,359
chrIII	5019485	5020243	myoPSI:0.55972222	950	+	5019485	5020243	0	2	50,50	0,708
chrIII	5019884	5020243	myoPSI:0.60467980	950	+	5019884	5020243	0	2	50,50	0,309
chrV	5551632	5551822	myoPSI:0.55990783	950	-	5551632	5551822	0	2	50,50	0,140
chrV	5550830	5551822	myoPSI:0.44009217	950	-	5550830	5551822	0	2	50,50	0,942
chrV	5550830	5551660	myoPSI:0.53125000	950	-	5550830	5551660	0	2	50,50	0,780
chrI	5569518	5569754	myoPSI:0.81593407	950	-	5569518	5569754	0	2	50,50	0,186
chrI	5569149	5569754	myoPSI:0.18406593	950	-	5569149	5569754	0	2	50,50	0,555
chrI	5569149	5569594	myoPSI:0.80223284	950	-	5569149	5569594	0	2	50,50	0,395
chrIII	5880428	5880597	myoPSI:0.43333333	950	+	5880428	5880597	0	2	50,50	0,119
chrIII	5879983	5881102	myoPSI:0.56666667	950	+	5879983	5881102	0	2	50,50	0,1069
chrIII	5880879	5881102	myoPSI:0.56847545	950	+	5880879	5881102	0	2	50,50	0,173
chrIII	5904402	5905446	myoPSI:0.39837801	950	-	5904402	5905446	0	2	50,50	0,994
chrIII	5905297	5905446	myoPSI:0.60162199	950	-	5905297	5905446	0	2	50,50	0,99
chrIII	5904402	5905294	myoPSI:0.61122625	950	-	5904402	5905294	0	2	50,50	0,842
chrIII	6004591	6004854	myoPSI:0.59325498	950	+	6004591	6004854	0	2	50,50	0,213
chrIII	6004591	6005300	myoPSI:0.40674502	950	+	6004591	6005300	0	2	50,50	0,659
chrIII	6004898	6005300	myoPSI:0.53290974	950	+	6004898	6005300	0	2	50,50	0,352
chrIV	6027474	6029206	myoPSI:0.41024709	950	-	6027474	6029206	0	2	50,50	0,1682
chrIV	6029058	6029206	myoPSI:0.58975291	950	-	6029058	6029206	0	2	50,50	0,98
chrIV	6027474	6029020	myoPSI:0.65037096	950	-	6027474	6029020	0	2	50,50	0,1496
chrIII	6127871	6129391	myoPSI:0.83887161	950	-	6127871	6129391	0	2	50,50	0,1470
chrIII	6128334	6129391	myoPSI:0.16112839	950	-	6128334	6129391	0	2	50,50	0,1007
chrIII	6127871	6128371	myoPSI:0.19053793	950	-	6127871	6128371	0	2	50,50	0,450
chrIII	6130440	6130830	myoPSI:0.19957213	950	-	6130440	6130830	0	2	50,50	0,340
chrIII	6130000	6130830	myoPSI:0.80042787	950	-	6130000	6130830	0	2	50,50	0,780
chrIII	6130000	6130261	myoPSI:0.33756645	950	-	6130000	6130261	0	2	50,50	0,211
chrIII	6166245	6166568	myoPSI:0.14740027	950	-	6166245	6166568	0	2	50,50	0,273
chrIII	6166414	6166568	myoPSI:0.85259973	950	-	6166414	6166568	0	2	50,50	0,104
chrIII	6166245	6166490	myoPSI:0.85605527	950	-	6166245	6166490	0	2	50,50	0,195
chrII	6197669	6198076	myoPSI:0.24778525	950	+	6197669	6198076	0	2	50,50	0,357
chrII	6197669	6197855	myoPSI:0.75221475	950	+	6197669	6197855	0	2	50,50	0,136
chrII	6197918	6198076	myoPSI:0.72725062	950	+	6197918	6198076	0	2	50,50	0,108
chrV	6216368	6216529	myoPSI:0.08934565	950	+	6216368	6216529	0	2	50,50	0,111
chrV	6216368	6216838	myoPSI:0.91065435	950	+	6216368	6216838	0	2	50,50	0,420
chrV	6216444	6216838	myoPSI:0.08235464	950	+	6216444	6216838	0	2	50,50	0,344
chrIII	6340410	6340882	myoPSI:0.89837261	950	-	6340410	6340882	0	2	50,50	0,422
chrIII	6340737	6340882	myoPSI:0.10162739	950	-	6340737	6340882	0	2	50,50	0,95
chrIII	6340410	6340741	myoPSI:0.09020734	950	-	6340410	6340741	0	2	50,50	0,281
chrII	6586120	6586314	myoPSI:0.57487725	950	-	6586120	6586314	0	2	50,50	0,144
chrII	6586062	6586314	myoPSI:0.42512275	950	-	6586062	6586314	0	2	50,50	0,202
chrII	6586062	6586211	myoPSI:0.63478013	950	-	6586062	6586211	0	2	50,50	0,99
chrV	6705242	6706247	myoPSI:0.56250000	950	-	6705242	6706247	0	2	50,50	0,955
chrV	6706105	6706247	myoPSI:0.43750000	950	-	6706105	6706247	0	2	50,50	0,92
chrV	6705242	6706097	myoPSI:0.51880943	950	-	6705242	6706097	0	2	50,50	0,805
chrIV	6914185	6915127	myoPSI:0.39247196	950	+	6914185	6915127	0	2	50,50	0,892
chrIV	6914185	6914859	myoPSI:0.60752804	950	+	6914185	6914859	0	2	50,50	0,624
chrIV	6914795	6915127	myoPSI:0.66689271	950	+	6914795	6915127	0	2	50,50	0,282
chrI	6927708	6928532	myoPSI:0.17570683	950	+	6927708	6928532	0	2	50,50	0,774
chrI	6927708	6928045	myoPSI:0.82429317	950	+	6927708	6928045	0	2	50,50	0,287
chrI	6928081	6928532	myoPSI:0.86932282	950	+	6928081	6928532	0	2	50,50	0,401
chrII	6953979	6954428	myoPSI:0.45963203	950	+	6953979	6954428	0	2	50,50	0,399
chrII	6953979	6954212	myoPSI:0.54036797	950	+	6953979	6954212	0	2	50,50	0,183
chrII	6954199	6954428	myoPSI:0.53494802	950	+	6954199	6954428	0	2	50,50	0,179
chrX	7239792	7240136	myoPSI:0.67759188	950	-	7239792	7240136	0	2	50,50	0,294
chrX	7239535	7240136	myoPSI:0.32240812	950	-	7239535	7240136	0	2	50,50	0,551
chrX	7239535	7239874	myoPSI:0.67459315	950	-	7239535	7239874	0	2	50,50	0,289
chrIV	7437809	7438237	myoPSI:0.81971154	950	+	7437809	7438237	0	2	50,50	0,378
chrIV	7437809	7437987	myoPSI:0.18028846	950	+	7437809	7437987	0	2	50,50	0,128
chrIV	7438004	7438237	myoPSI:0.21422266	950	+	7438004	7438237	0	2	50,50	0,183
chrII	7683477	7683725	myoPSI:0.66633444	950	+	7683477	7683725	0	2	50,50	0,198
chrII	7683477	7684015	myoPSI:0.33366556	950	+	7683477	7684015	0	2	50,50	0,488
chrII	7683717	7684015	myoPSI:0.76754748	950	+	7683717	7684015	0	2	50,50	0,248
chrX	7940574	7940933	myoPSI:0.09938843	950	-	7940574	7940933	0	2	50,50	0,309
chrX	7940774	7940933	myoPSI:0.90061157	950	-	7940774	7940933	0	2	50,50	0,109
chrX	7940574	7940846	myoPSI:0.89887615	950	-	7940574	7940846	0	2	50,50	0,222
chrIII	8332390	8332635	myoPSI:0.08349254	950	+	8332390	8332635	0	2	50,50	0,195
chrIII	8332390	8332822	myoPSI:0.91650746	950	+	8332390	8332822	0	2	50,50	0,382
chrIII	8332594	8332822	myoPSI:0.09044934	950	+	8332594	8332822	0	2	50,50	0,178
chrIII	8632740	8633111	myoPSI:0.42269737	950	+	8632740	8633111	0	2	50,50	0,321
chrIII	8632740	8633295	myoPSI:0.57730263	950	+	8632740	8633295	0	2	50,50	0,505
chrIII	8633126	8633295	myoPSI:0.37039207	950	+	8633126	8633295	0	2	50,50	0,119
chrII	8998257	8998798	myoPSI:0.21109913	950	+	8998257	8998798	0	2	50,50	0,491
chrII	8998257	8998470	myoPSI:0.78890087	950	+	8998257	8998470	0	2	50,50	0,163
chrII	8998609	8998798	myoPSI:0.83640073	950	+	8998609	8998798	0	2	50,50	0,139
chrIV	9095248	9095392	myoPSI:0.36945915	950	-	9095248	9095392	0	2	50,50	0,94
chrIV	9095129	9095392	myoPSI:0.63054085	950	-	9095129	9095392	0	2	50,50	0,213
chrIV	9095129	9095288	myoPSI:0.37613498	950	-	9095129	9095288	0	2	50,50	0,109
chrII	9259334	9259720	myoPSI:0.58376644	950	-	9259334	9259720	0	2	50,50	0,336
chrII	9259567	9259720	myoPSI:0.41623356	950	-	9259567	9259720	0	2	50,50	0,103
chrII	9259334	9259639	myoPSI:0.44428760	950	-	9259334	9259639	0	2	50,50	0,255
chrV	9343517	9343725	myoPSI:0.88483775	950	-	9343517	9343725	0	2	50,50	0,158
chrV	9343366	9343725	myoPSI:0.11516225	950	-	9343366	9343725	0	2	50,50	0,309
chrV	9343366	9343550	myoPSI:0.86180415	950	-	9343366	9343550	0	2	50,50	0,134
chrV	9459425	9459643	myoPSI:0.88870432	950	+	9459425	9459643	0	2	50,50	0,168
chrV	9459425	9460101	myoPSI:0.11129568	950	+	9459425	9460101	0	2	50,50	0,626
chrV	9459620	9460101	myoPSI:0.87357573	950	+	9459620	9460101	0	2	50,50	0,431
chrX	9556784	9557267	myoPSI:0.61458333	950	+	9556784	9557267	0	2	50,50	0,433
chrX	9556784	9557007	myoPSI:0.38541667	950	+	9556784	9557007	0	2	50,50	0,173
chrX	9557000	9557267	myoPSI:0.53668091	950	+	9557000	9557267	0	2	50,50	0,217
chrX	9559045	9559276	myoPSI:0.89831353	950	+	9559045	9559276	0	2	50,50	0,181
chrX	9559045	9559527	myoPSI:0.10168647	950	+	9559045	9559527	0	2	50,50	0,432
chrX	9559296	9559527	myoPSI:0.91283142	950	+	9559296	9559527	0	2	50,50	0,181
chrV	9706968	9707137	myoPSI:0.41651032	950	+	9706968	9707137	0	2	50,50	0,119
chrV	9706968	9707582	myoPSI:0.58348968	950	+	9706968	9707582	0	2	50,50	0,564
chrV	9707106	9707582	myoPSI:0.46098154	950	+	9707106	9707582	0	2	50,50	0,426
chrIII	9855533	9856140	myoPSI:0.40857722	950	-	9855533	9856140	0	2	50,50	0,557
chrIII	9855913	9856140	myoPSI:0.59142278	950	-	9855913	9856140	0	2	50,50	0,177
chrIII	9855533	9855986	myoPSI:0.60052310	950	-	9855533	9855986	0	2	50,50	0,403
chrIII	9961614	9962811	myoPSI:0.09460225	950	+	9961614	9962811	0	2	50,50	0,1147
chrIII	9961614	9962136	myoPSI:0.90539775	950	+	9961614	9962136	0	2	50,50	0,472
chrIII	9962144	9962811	myoPSI:0.92979554	950	+	9962144	9962811	0	2	50,50	0,617
chrIV	10336214	10337681	myoPSI:0.28172815	950	-	10336214	10337681	0	2	50,50	0,1417
chrIV	10334119	10337681	myoPSI:0.71827185	950	-	10334119	10337681	0	2	50,50	0,3512
chrIV	10334119	10336161	myoPSI:0.27336675	950	-	10334119	10336161	0	2	50,50	0,1992
chrV	10475507	10475691	myoPSI:0.73536392	950	+	10475507	10475691	0	2	50,50	0,134
chrV	10475507	10476328	myoPSI:0.26463608	950	+	10475507	10476328	0	2	50,50	0,771
chrV	10475654	10476328	myoPSI:0.70929071	950	+	10475654	10476328	0	2	50,50	0,624
chrIV	10677552	10677982	myoPSI:0.46853147	950	+	10677552	10677982	0	2	50,50	0,380
chrIV	10677552	10677723	myoPSI:0.53146853	950	+	10677552	10677723	0	2	50,50	0,121
chrIV	10677719	10677982	myoPSI:0.55973987	950	+	10677719	10677982	0	2	50,50	0,213
chrV	11345753	11346467	myoPSI:0.17143417	950	-	11345753	11346467	0	2	50,50	0,664
chrV	11346175	11346467	myoPSI:0.82856583	950	-	11346175	11346467	0	2	50,50	0,242
chrV	11345753	11346218	myoPSI:0.84895121	950	-	11345753	11346218	0	2	50,50	0,415
chrX	11395170	11395316	myoPSI:0.66666667	950	-	11395170	11395316	0	2	50,50	0,96
chrX	11394946	11395316	myoPSI:0.33333333	950	-	11394946	11395316	0	2	50,50	0,320
chrX	11394946	11395234	myoPSI:0.68384615	950	-	11394946	11395234	0	2	50,50	0,238
chrII	11594414	11594756	myoPSI:0.53516595	950	-	11594414	11594756	0	2	50,50	0,292
chrII	11594582	11594756	myoPSI:0.46483405	950	-	11594582	11594756	0	2	50,50	0,124
chrII	11594414	11594643	myoPSI:0.47659413	950	-	11594414	11594643	0	2	50,50	0,179
chrX	11834075	11834437	myoPSI:0.50423950	950	+	11834075	11834437	0	2	50,50	0,312
chrX	11834075	11834893	myoPSI:0.49576050	950	+	11834075	11834893	0	2	50,50	0,768
chrX	11834466	11834893	myoPSI:0.56388154	950	+	11834466	11834893	0	2	50,50	0,377
chrII	11978872	11979332	myoPSI:0.32968502	950	-	11978872	11979332	0	2	50,50	0,410
chrII	11979054	11979332	myoPSI:0.67031498	950	-	11979054	11979332	0	2	50,50	0,228
chrII	11978872	11979097	myoPSI:0.69949478	950	-	11978872	11979097	0	2	50,50	0,175
chrV	11992608	11992967	myoPSI:0.23188406	950	-	11992608	11992967	0	2	50,50	0,309
chrV	11992098	11992967	myoPSI:0.76811594	950	-	11992098	11992967	0	2	50,50	0,819
chrV	11992098	11992657	myoPSI:0.26126126	950	-	11992098	11992657	0	2	50,50	0,509
chrX	12018418	12018750	myoPSI:0.89916385	950	+	12018418	12018750	0	2	50,50	0,282
chrX	12018418	12018584	myoPSI:0.10083615	950	+	12018418	12018584	0	2	50,50	0,116
chrX	12018526	12018750	myoPSI:0.16714801	950	+	12018526	12018750	0	2	50,50	0,174
chrI	12063196	12063497	myoPSI:0.82378049	950	-	12063196	12063497	0	2	50,50	0,251
chrI	12062846	12063497	myoPSI:0.17621951	950	-	12062846	12063497	0	2	50,50	0,601
chrI	12062846	12063160	myoPSI:0.86574074	950	-	12062846	12063160	0	2	50,50	0,264
chrIV	12413751	12413903	myoPSI:0.28442511	950	-	12413751	12413903	0	2	50,50	0,102
chrIV	12413189	12413903	myoPSI:0.71557489	950	-	12413189	12413903	0	2	50,50	0,664
chrIV	12413189	12413794	myoPSI:0.34574813	950	-	12413189	12413794	0	2	50,50	0,555
chrV	12699218	12699898	myoPSI:0.80735386	950	+	12699218	12699898	0	2	50,50	0,630
chrV	12699218	12699456	myoPSI:0.19264614	950	+	12699218	12699456	0	2	50,50	0,188
chrV	12699395	12699898	myoPSI:0.18384562	950	+	12699395	12699898	0	2	50,50	0,453
chrII	12784388	12785368	myoPSI:0.70903226	950	-	12784388	12785368	0	2	50,50	0,930
chrII	12785075	12785368	myoPSI:0.29096774	950	-	12785075	12785368	0	2	50,50	0,243
chrII	12784388	12785121	myoPSI:0.36077450	950	-	12784388	12785121	0	2	50,50	0,683
chrIV	13033880	13034873	myoPSI:0.54289757	950	+	13033880	13034873	0	2	50,50	0,943
chrIV	13033880	13034502	myoPSI:0.45710243	950	+	13033880	13034502	0	2	50,50	0,572
chrIV	13034478	13034873	myoPSI:0.53680445	950	+	13034478	13034873	0	2	50,50	0,345
chrIII	13515467	13516754	myoPSI:0.88775988	950	-	13515467	13516754	0	2	50,50	0,1237
chrIII	13516023	13516577	myoPSI:0.11224012	950	-	13516023	13516577	0	2	50,50	0,504
chrIII	13515467	13516075	myoPSI:0.10938766	950	-	13515467	13516075	0	2	50,50	0,558
chrIV	14073593	14073977	myoPSI:0.73302469	950	+	14073593	14073977	0	2	50,50	0,334
chrIV	14073593	14074674	myoPSI:0.26697531	950	+	14073593	14074674	0	2	50,50	0,1031
chrIV	14074217	14074674	myoPSI:0.79821381	950	+	14074217	14074674	0	2	50,50	0,407
chrI	14569890	14570102	myoPSI:0.74738167	950	-	14569890	14570102	0	2	50,50	0,162
chrI	14567447	14570102	myoPSI:0.25261833	950	-	14567447	14570102	0	2	50,50	0,2605
chrI	14567447	14569966	myoPSI:0.72529925	950	-	14567447	14569966	0	2	50,50	0,2469
chrIV	14789464	14790197	myoPSI:0.44135251	950	+	14789464	14790197	0	2	50,50	0,683
chrIV	14789464	14789899	myoPSI:0.55864749	950	+	14789464	14789899	0	2	50,50	0,385
chrIV	14790015	14790197	myoPSI:0.65855370	950	+	14790015	14790197	0	2	50,50	0,132
chrX	15190490	15190646	myoPSI:0.92005658	950	+	15190490	15190646	0	2	50,50	0,106
chrX	15190490	15191163	myoPSI:0.07994342	950	+	15190490	15191163	0	2	50,50	0,623
chrX	15190613	15191163	myoPSI:0.93102266	950	+	15190613	15191163	0	2	50,50	0,500
chrX	15572290	15572563	myoPSI:0.16689661	950	+	15572290	15572563	0	2	50,50	0,223
chrX	15572290	15572926	myoPSI:0.83310339	950	+	15572290	15572926	0	2	50,50	0,586
chrX	15572545	15572926	myoPSI:0.15560896	950	+	15572545	15572926	0	2	50,50	0,331
chrX	17673430	17674408	myoPSI:0.85263255	950	+	17673430	17674408	0	2	50,50	0,928
chrX	17673430	17674167	myoPSI:0.14736745	950	+	17673430	17674167	0	2	50,50	0,687
chrX	17674217	17674408	myoPSI:0.16946498	950	+	17674217	17674408	0	2	50,50	0,141
chrX	17675199	17675414	myoPSI:0.85497238	950	+	17675199	17675414	0	2	50,50	0,165
chrX	17675199	17675813	myoPSI:0.14502762	950	+	17675199	17675813	0	2	50,50	0,564
chrX	17675572	17675813	myoPSI:0.91987661	950	+	17675572	17675813	0	2	50,50	0,191
Alt3'/5' SS
track name=myo_AltSS description='myo_AltSS'
chrV	7343	7482	myoPSI:0.23941076	950	-	7343	7482	0	2	50,50	0,89
chrV	7334	7482	myoPSI:0.70763978	950	-	7334	7482	0	2	50,50	0,98
chrX	60072	60227	myoPSI:0.51804139	950	+	60072	60227	0	2	50,50	0,105
chrX	59987	60227	myoPSI:0.48195861	950	+	59987	60227	0	2	50,50	0,190
chrV	116739	117407	myoPSI:0.60834371	950	+	116739	117407	0	2	50,50	0,618
chrV	116739	117413	myoPSI:0.39165629	950	+	116739	117413	0	2	50,50	0,624
chrV	172881	173028	myoPSI:0.88184211	950	+	172881	173028	0	2	50,50	0,97
chrV	172881	173019	myoPSI:0.11815789	950	+	172881	173019	0	2	50,50	0,88
chrIV	193105	193943	myoPSI:0.15336134	950	+	193105	193943	0	2	50,50	0,788
chrIV	193266	193943	myoPSI:0.84663866	950	+	193266	193943	0	2	50,50	0,627
chrII	219885	220100	myoPSI:0.26944049	950	-	219885	220100	0	2	50,50	0,165
chrII	219885	220115	myoPSI:0.73055951	950	-	219885	220115	0	2	50,50	0,180
chrIII	345032	345515	myoPSI:0.47327726	950	-	345032	345515	0	2	50,50	0,433
chrIII	345023	345515	myoPSI:0.52672274	950	-	345023	345515	0	2	50,50	0,442
chrIII	346818	347088	myoPSI:0.89533234	950	-	346818	347088	0	2	50,50	0,220
chrIII	346833	347088	myoPSI:0.10466766	950	-	346833	347088	0	2	50,50	0,205
chrIII	454341	455094	myoPSI:0.58838931	950	-	454341	455094	0	2	50,50	0,703
chrIII	454341	455139	myoPSI:0.41161069	950	-	454341	455139	0	2	50,50	0,748
chrIII	473932	474496	myoPSI:0.39370974	950	+	473932	474496	0	2	50,50	0,514
chrIII	473932	474490	myoPSI:0.60629026	950	+	473932	474490	0	2	50,50	0,508
chrI	536256	536405	myoPSI:0.92240972	950	+	536256	536405	0	2	50,50	0,99
chrI	536256	536399	myoPSI:0.07759028	950	+	536256	536399	0	2	50,50	0,93
chrI	845711	845979	myoPSI:0.87300282	950	-	845711	845979	0	2	50,50	0,218
chrI	845711	845870	myoPSI:0.12699718	950	-	845711	845870	0	2	50,50	0,109
chrII	1121755	1122717	myoPSI:0.62265712	950	-	1121755	1122717	0	2	50,50	0,912
chrII	1121752	1122717	myoPSI:0.37734288	950	-	1121752	1122717	0	2	50,50	0,915
chrIII	1216199	1217663	myoPSI:0.30212766	950	-	1216199	1217663	0	2	50,50	0,1414
chrIII	1216766	1217663	myoPSI:0.69787234	950	-	1216766	1217663	0	2	50,50	0,847
chrV	1316869	1317013	myoPSI:0.23231122	950	-	1316869	1317013	0	2	50,50	0,94
chrV	1316851	1317013	myoPSI:0.76768878	950	-	1316851	1317013	0	2	50,50	0,112
chrX	1500808	1501823	myoPSI:0.68181818	950	-	1500808	1501823	0	2	50,50	0,965
chrX	1500808	1501639	myoPSI:0.31818182	950	-	1500808	1501639	0	2	50,50	0,781
chrI	1710946	1712759	myoPSI:0.16059937	950	+	1710946	1712759	0	2	50,50	0,1763
chrI	1710946	1712765	myoPSI:0.83940063	950	+	1710946	1712765	0	2	50,50	0,1769
chrIV	1741382	1741529	myoPSI:0.16251484	950	-	1741382	1741529	0	2	50,50	0,97
chrIV	1741382	1741535	myoPSI:0.83748516	950	-	1741382	1741535	0	2	50,50	0,103
chrIII	1879497	1880234	myoPSI:0.42511069	950	+	1879497	1880234	0	2	50,50	0,687
chrIII	1879521	1880234	myoPSI:0.57488931	950	+	1879521	1880234	0	2	50,50	0,663
chrI	1953499	1955319	myoPSI:0.32843137	950	-	1953499	1955319	0	2	50,50	0,1770
chrI	1953574	1955319	myoPSI:0.67156863	950	-	1953574	1955319	0	2	50,50	0,1695
chrI	2061832	2061986	myoPSI:0.83304264	950	-	2061832	2061986	0	2	50,50	0,104
chrI	2061832	2061977	myoPSI:0.16695736	950	-	2061832	2061977	0	2	50,50	0,95
chrV	2062467	2063380	myoPSI:0.68246658	950	-	2062467	2063380	0	2	50,50	0,863
chrV	2062458	2063380	myoPSI:0.31753342	950	-	2062458	2063380	0	2	50,50	0,872
chrI	2203814	2204974	myoPSI:0.23468533	950	+	2203814	2204974	0	2	50,50	0,1110
chrI	2203814	2205262	myoPSI:0.76531467	950	+	2203814	2205262	0	2	50,50	0,1398
chrIII	2306077	2307076	myoPSI:0.22764706	950	-	2306077	2307076	0	2	50,50	0,949
chrIII	2306077	2306580	myoPSI:0.77235294	950	-	2306077	2306580	0	2	50,50	0,453
chrIV	2312859	2313840	myoPSI:0.93839286	950	-	2312859	2313840	0	2	50,50	0,931
chrIV	2312857	2313840	myoPSI:0.06160714	950	-	2312857	2313840	0	2	50,50	0,933
chrIV	2386632	2386778	myoPSI:0.54435417	950	+	2386632	2386778	0	2	50,50	0,96
chrIV	2386605	2386772	myoPSI:0.45564583	950	+	2386605	2386772	0	2	50,50	0,117
chrI	2669161	2669683	myoPSI:0.30948527	950	+	2669161	2669683	0	2	50,50	0,472
chrI	2669161	2669680	myoPSI:0.69051473	950	+	2669161	2669680	0	2	50,50	0,469
chrI	2670148	2670296	myoPSI:0.66967085	950	+	2670148	2670296	0	2	50,50	0,98
chrI	2670148	2670302	myoPSI:0.33032915	950	+	2670148	2670302	0	2	50,50	0,104
chrIII	2782901	2783984	myoPSI:0.53421012	950	-	2782901	2783984	0	2	50,50	0,1033
chrIII	2782901	2783963	myoPSI:0.46578988	950	-	2782901	2783963	0	2	50,50	0,1012
chrIII	2824620	2825745	myoPSI:0.52538392	950	+	2824620	2825745	0	2	50,50	0,1075
chrIII	2824613	2825745	myoPSI:0.47461608	950	+	2824613	2825745	0	2	50,50	0,1082
chrI	2866555	2867293	myoPSI:0.19004956	950	+	2866555	2867293	0	2	50,50	0,688
chrI	2866561	2867293	myoPSI:0.80995044	950	+	2866561	2867293	0	2	50,50	0,682
chrI	2872703	2873164	myoPSI:0.70139785	950	-	2872703	2873164	0	2	50,50	0,411
chrI	2872712	2873164	myoPSI:0.29860215	950	-	2872712	2873164	0	2	50,50	0,402
chrX	3100504	3101130	myoPSI:0.11212713	950	-	3100504	3101130	0	2	50,50	0,576
chrX	3100559	3101130	myoPSI:0.88787287	950	-	3100559	3101130	0	2	50,50	0,521
chrI	3160063	3160204	myoPSI:0.16863596	950	-	3160063	3160204	0	2	50,50	0,91
chrI	3160057	3160204	myoPSI:0.83136404	950	-	3160057	3160204	0	2	50,50	0,97
chrI	3220755	3220990	myoPSI:0.52145749	950	-	3220755	3220990	0	2	50,50	0,185
chrI	3220779	3220990	myoPSI:0.47854251	950	-	3220779	3220990	0	2	50,50	0,161
chrI	3264427	3264574	myoPSI:0.15084541	950	-	3264427	3264574	0	2	50,50	0,97
chrI	3264427	3264579	myoPSI:0.84915459	950	-	3264427	3264579	0	2	50,50	0,102
chrII	3306448	3306686	myoPSI:0.41472434	950	-	3306448	3306686	0	2	50,50	0,188
chrII	3306453	3306686	myoPSI:0.58527566	950	-	3306453	3306686	0	2	50,50	0,183
chrIV	3337460	3337612	myoPSI:0.69848572	950	-	3337460	3337612	0	2	50,50	0,102
chrIV	3337460	3337609	myoPSI:0.30151428	950	-	3337460	3337609	0	2	50,50	0,99
chrI	3340549	3340697	myoPSI:0.75539447	950	-	3340549	3340697	0	2	50,50	0,98
chrI	3340555	3340697	myoPSI:0.24460553	950	-	3340555	3340697	0	2	50,50	0,92
chrIII	3402927	3403131	myoPSI:0.21741651	950	-	3402927	3403131	0	2	50,50	0,154
chrIII	3402927	3403203	myoPSI:0.78258349	950	-	3402927	3403203	0	2	50,50	0,226
chrIV	3803583	3803755	myoPSI:0.50367232	950	+	3803583	3803755	0	2	50,50	0,122
chrIV	3803587	3803755	myoPSI:0.49632768	950	+	3803587	3803755	0	2	50,50	0,118
chrII	3926035	3926966	myoPSI:0.34389952	950	-	3926035	3926966	0	2	50,50	0,881
chrII	3926029	3926966	myoPSI:0.65610048	950	-	3926029	3926966	0	2	50,50	0,887
chrIII	3965827	3966416	myoPSI:0.76836686	950	-	3965827	3966416	0	2	50,50	0,539
chrIII	3965836	3966416	myoPSI:0.23163314	950	-	3965836	3966416	0	2	50,50	0,530
chrI	4002458	4002646	myoPSI:0.84079315	950	-	4002458	4002646	0	2	50,50	0,138
chrI	4002458	4002601	myoPSI:0.15920685	950	-	4002458	4002601	0	2	50,50	0,93
chrX	4150216	4150357	myoPSI:0.35702765	950	-	4150216	4150357	0	2	50,50	0,91
chrX	4150210	4150357	myoPSI:0.64297235	950	-	4150210	4150357	0	2	50,50	0,97
chrV	4188482	4188658	myoPSI:0.46760474	950	+	4188482	4188658	0	2	50,50	0,126
chrV	4188482	4188663	myoPSI:0.53239526	950	+	4188482	4188663	0	2	50,50	0,131
chrX	4246794	4246937	myoPSI:0.71233646	950	-	4246794	4246937	0	2	50,50	0,93
chrX	4246786	4246937	myoPSI:0.28766354	950	-	4246786	4246937	0	2	50,50	0,101
chrIII	4277321	4277854	myoPSI:0.23430785	950	-	4277321	4277854	0	2	50,50	0,483
chrIII	4277330	4277854	myoPSI:0.76569215	950	-	4277330	4277854	0	2	50,50	0,474
chrX	4342233	4342381	myoPSI:0.63585434	950	+	4342233	4342381	0	2	50,50	0,98
chrX	4342233	4342375	myoPSI:0.36414566	950	+	4342233	4342375	0	2	50,50	0,92
chrV	4372843	4373001	myoPSI:0.66648809	950	+	4372843	4373001	0	2	50,50	0,108
chrV	4372843	4372986	myoPSI:0.33351191	950	+	4372843	4372986	0	2	50,50	0,93
chrIV	4469233	4469385	myoPSI:0.79389623	950	-	4469233	4469385	0	2	50,50	0,102
chrIV	4469233	4469379	myoPSI:0.20610377	950	-	4469233	4469379	0	2	50,50	0,96
chrII	4521176	4521328	myoPSI:0.50012875	950	+	4521176	4521328	0	2	50,50	0,102
chrII	4521176	4521316	myoPSI:0.49987125	950	+	4521176	4521316	0	2	50,50	0,90
chrII	4521646	4522024	myoPSI:0.62807190	950	+	4521646	4522024	0	2	50,50	0,328
chrII	4521668	4522024	myoPSI:0.37192810	950	+	4521668	4522024	0	2	50,50	0,306
chrIII	4557487	4557627	myoPSI:0.22608696	950	+	4557487	4557627	0	2	50,50	0,90
chrIII	4557487	4557633	myoPSI:0.77391304	950	+	4557487	4557633	0	2	50,50	0,96
chrIII	4559532	4559680	myoPSI:0.41120104	950	+	4559532	4559680	0	2	50,50	0,98
chrIII	4559532	4559687	myoPSI:0.58879896	950	+	4559532	4559687	0	2	50,50	0,105
chrIV	4612406	4613199	myoPSI:0.27176339	950	-	4612406	4613199	0	2	50,50	0,743
chrIV	4612412	4613199	myoPSI:0.72823661	950	-	4612412	4613199	0	2	50,50	0,737
chrV	4687138	4687280	myoPSI:0.21047060	950	+	4687138	4687280	0	2	50,50	0,92
chrV	4687138	4687289	myoPSI:0.78952940	950	+	4687138	4687289	0	2	50,50	0,101
chrII	4702845	4703014	myoPSI:0.85708065	950	+	4702845	4703014	0	2	50,50	0,119
chrII	4702845	4703034	myoPSI:0.14291935	950	+	4702845	4703034	0	2	50,50	0,139
chrX	4710212	4710360	myoPSI:0.52065740	950	-	4710212	4710360	0	2	50,50	0,98
chrX	4710212	4710366	myoPSI:0.47934260	950	-	4710212	4710366	0	2	50,50	0,104
chrIV	4712343	4712490	myoPSI:0.63893344	950	-	4712343	4712490	0	2	50,50	0,97
chrIV	4712343	4712504	myoPSI:0.36106656	950	-	4712343	4712504	0	2	50,50	0,111
chrI	4771439	4771670	myoPSI:0.43229681	950	-	4771439	4771670	0	2	50,50	0,181
chrI	4771439	4771653	myoPSI:0.56770319	950	-	4771439	4771653	0	2	50,50	0,164
chrI	4849310	4849596	myoPSI:0.39458340	950	+	4849310	4849596	0	2	50,50	0,236
chrI	4849340	4849596	myoPSI:0.60541660	950	+	4849340	4849596	0	2	50,50	0,206
chrIII	4919189	4919335	myoPSI:0.15759282	950	-	4919189	4919335	0	2	50,50	0,96
chrIII	4919183	4919335	myoPSI:0.84240718	950	-	4919183	4919335	0	2	50,50	0,102
chrI	4921400	4922047	myoPSI:0.33666667	950	-	4921400	4922047	0	2	50,50	0,597
chrI	4921394	4922047	myoPSI:0.66333333	950	-	4921394	4922047	0	2	50,50	0,603
chrII	4951497	4951641	myoPSI:0.44619666	950	+	4951497	4951641	0	2	50,50	0,94
chrII	4951497	4951650	myoPSI:0.55380334	950	+	4951497	4951650	0	2	50,50	0,103
chrII	4996873	4997024	myoPSI:0.48648649	950	+	4996873	4997024	0	2	50,50	0,101
chrII	4996873	4997043	myoPSI:0.51351351	950	+	4996873	4997043	0	2	50,50	0,120
chrIII	5347070	5347549	myoPSI:0.57134503	950	-	5347070	5347549	0	2	50,50	0,429
chrIII	5347076	5347549	myoPSI:0.42865497	950	-	5347076	5347549	0	2	50,50	0,423
chrI	5349273	5349421	myoPSI:0.14805696	950	+	5349273	5349421	0	2	50,50	0,98
chrI	5349278	5349421	myoPSI:0.85194304	950	+	5349278	5349421	0	2	50,50	0,93
chrIV	5351533	5351848	myoPSI:0.75450544	950	-	5351533	5351848	0	2	50,50	0,265
chrIV	5351533	5351856	myoPSI:0.24549456	950	-	5351533	5351856	0	2	50,50	0,273
chrI	5364070	5364720	myoPSI:0.24670846	950	+	5364070	5364720	0	2	50,50	0,600
chrI	5364158	5364720	myoPSI:0.75329154	950	+	5364158	5364720	0	2	50,50	0,512
chrI	5430655	5430810	myoPSI:0.42209401	950	+	5430655	5430810	0	2	50,50	0,105
chrI	5430655	5430822	myoPSI:0.57790599	950	+	5430655	5430822	0	2	50,50	0,117
chrIII	5448062	5448214	myoPSI:0.35169492	950	-	5448062	5448214	0	2	50,50	0,102
chrIII	5448071	5448214	myoPSI:0.64830508	950	-	5448071	5448214	0	2	50,50	0,93
chrIV	5540142	5540379	myoPSI:0.15552286	950	+	5540142	5540379	0	2	50,50	0,187
chrIV	5540163	5540379	myoPSI:0.84447714	950	+	5540163	5540379	0	2	50,50	0,166
chrII	5630203	5630920	myoPSI:0.69349845	950	-	5630203	5630920	0	2	50,50	0,667
chrII	5630209	5630920	myoPSI:0.30650155	950	-	5630209	5630920	0	2	50,50	0,661
chrIII	5693164	5693304	myoPSI:0.42840612	950	+	5693164	5693304	0	2	50,50	0,90
chrIII	5693164	5693313	myoPSI:0.57159388	950	+	5693164	5693313	0	2	50,50	0,99
chrV	5774232	5774601	myoPSI:0.10426491	950	-	5774232	5774601	0	2	50,50	0,319
chrV	5774232	5774649	myoPSI:0.89573509	950	-	5774232	5774649	0	2	50,50	0,367
chrIV	5828804	5829762	myoPSI:0.08301588	950	+	5828804	5829762	0	2	50,50	0,908
chrIV	5828819	5829762	myoPSI:0.91698412	950	+	5828819	5829762	0	2	50,50	0,893
chrIII	5946649	5946793	myoPSI:0.18294144	950	-	5946649	5946793	0	2	50,50	0,94
chrIII	5946643	5946793	myoPSI:0.81705856	950	-	5946643	5946793	0	2	50,50	0,100
chrIII	5971730	5972558	myoPSI:0.92052498	950	-	5971730	5972558	0	2	50,50	0,778
chrIII	5971730	5972611	myoPSI:0.07947502	950	-	5971730	5972611	0	2	50,50	0,831
chrI	5998605	5998759	myoPSI:0.55192669	950	-	5998605	5998759	0	2	50,50	0,104
chrI	5998614	5998759	myoPSI:0.44807331	950	-	5998614	5998759	0	2	50,50	0,95
chrX	6047321	6047478	myoPSI:0.55882353	950	-	6047321	6047478	0	2	50,50	0,107
chrX	6047330	6047478	myoPSI:0.44117647	950	-	6047330	6047478	0	2	50,50	0,98
chrI	6071430	6071774	myoPSI:0.69783802	950	-	6071430	6071774	0	2	50,50	0,294
chrI	6071430	6071828	myoPSI:0.30216198	950	-	6071430	6071828	0	2	50,50	0,348
chrI	6108778	6108923	myoPSI:0.56727789	950	-	6108778	6108923	0	2	50,50	0,95
chrI	6108778	6108936	myoPSI:0.43272211	950	-	6108778	6108936	0	2	50,50	0,108
chrI	6125543	6125700	myoPSI:0.79076740	950	+	6125543	6125700	0	2	50,50	0,107
chrI	6125543	6125694	myoPSI:0.20923260	950	+	6125543	6125694	0	2	50,50	0,101
chrIII	6196302	6196512	myoPSI:0.72174725	950	-	6196302	6196512	0	2	50,50	0,160
chrIII	6196302	6196485	myoPSI:0.27825275	950	-	6196302	6196485	0	2	50,50	0,133
chrII	6197436	6197585	myoPSI:0.47600592	950	+	6197436	6197585	0	2	50,50	0,99
chrII	6197442	6197585	myoPSI:0.52399408	950	+	6197442	6197585	0	2	50,50	0,93
chrIII	6247261	6247406	myoPSI:0.25204592	950	-	6247261	6247406	0	2	50,50	0,95
chrIII	6247252	6247406	myoPSI:0.74795408	950	-	6247252	6247406	0	2	50,50	0,104
chrI	6319292	6319500	myoPSI:0.79090909	950	+	6319292	6319500	0	2	50,50	0,158
chrI	6319292	6319491	myoPSI:0.20909091	950	+	6319292	6319491	0	2	50,50	0,149
chrIV	6325183	6325369	myoPSI:0.78871305	950	+	6325183	6325369	0	2	50,50	0,136
chrIV	6325183	6325360	myoPSI:0.21128695	950	+	6325183	6325360	0	2	50,50	0,127
chrIII	6416439	6416721	myoPSI:0.85094560	950	-	6416439	6416721	0	2	50,50	0,232
chrIII	6416439	6416717	myoPSI:0.14905440	950	-	6416439	6416717	0	2	50,50	0,228
chrV	6427621	6428095	myoPSI:0.60381653	950	-	6427621	6428095	0	2	50,50	0,424
chrV	6427283	6428095	myoPSI:0.39618347	950	-	6427283	6428095	0	2	50,50	0,762
chrX	6558590	6558937	myoPSI:0.68524333	950	+	6558590	6558937	0	2	50,50	0,297
chrX	6558601	6558937	myoPSI:0.31475667	950	+	6558601	6558937	0	2	50,50	0,286
chrIV	6566298	6567111	myoPSI:0.84568903	950	-	6566298	6567111	0	2	50,50	0,763
chrIV	6566298	6567150	myoPSI:0.15431097	950	-	6566298	6567150	0	2	50,50	0,802
chrI	6584105	6584318	myoPSI:0.38704351	950	+	6584105	6584318	0	2	50,50	0,163
chrI	6584105	6584324	myoPSI:0.61295649	950	+	6584105	6584324	0	2	50,50	0,169
chrIV	6585080	6585257	myoPSI:0.75431987	950	-	6585080	6585257	0	2	50,50	0,127
chrIV	6585086	6585257	myoPSI:0.24568013	950	-	6585086	6585257	0	2	50,50	0,121
chrV	6606855	6607554	myoPSI:0.32495640	950	-	6606855	6607554	0	2	50,50	0,649
chrV	6606855	6607520	myoPSI:0.67504360	950	-	6606855	6607520	0	2	50,50	0,615
chrIII	6733080	6733234	myoPSI:0.82648026	950	+	6733080	6733234	0	2	50,50	0,104
chrIII	6733080	6733228	myoPSI:0.17351974	950	+	6733080	6733228	0	2	50,50	0,98
chrI	6795856	6796057	myoPSI:0.62500000	950	+	6795856	6796057	0	2	50,50	0,151
chrI	6795856	6796072	myoPSI:0.37500000	950	+	6795856	6796072	0	2	50,50	0,166
chrI	6796716	6796922	myoPSI:0.47888514	950	+	6796716	6796922	0	2	50,50	0,156
chrI	6796716	6796916	myoPSI:0.52111486	950	+	6796716	6796916	0	2	50,50	0,150
chrIII	6866642	6866800	myoPSI:0.34013605	950	-	6866642	6866800	0	2	50,50	0,108
chrIII	6866642	6866815	myoPSI:0.65986395	950	-	6866642	6866815	0	2	50,50	0,123
chrI	7047837	7047994	myoPSI:0.32624616	950	+	7047837	7047994	0	2	50,50	0,107
chrI	7047837	7047985	myoPSI:0.67375384	950	+	7047837	7047985	0	2	50,50	0,98
chrIV	7051599	7051825	myoPSI:0.36184211	950	+	7051599	7051825	0	2	50,50	0,176
chrIV	7051599	7051777	myoPSI:0.63815789	950	+	7051599	7051777	0	2	50,50	0,128
chrII	7055834	7055982	myoPSI:0.68774438	950	+	7055834	7055982	0	2	50,50	0,98
chrII	7055834	7055975	myoPSI:0.31225562	950	+	7055834	7055975	0	2	50,50	0,91
chrV	7062026	7062238	myoPSI:0.41436926	950	+	7062026	7062238	0	2	50,50	0,162
chrV	7062008	7062238	myoPSI:0.58563074	950	+	7062008	7062238	0	2	50,50	0,180
chrX	7074303	7075081	myoPSI:0.78807018	950	-	7074303	7075081	0	2	50,50	0,728
chrX	7074295	7075081	myoPSI:0.21192982	950	-	7074295	7075081	0	2	50,50	0,736
chrI	7098645	7098793	myoPSI:0.07601339	950	+	7098645	7098793	0	2	50,50	0,98
chrI	7098645	7098789	myoPSI:0.92398661	950	+	7098645	7098789	0	2	50,50	0,94
chrIV	7104394	7104557	myoPSI:0.84646457	950	+	7104394	7104557	0	2	50,50	0,113
chrIV	7104376	7104557	myoPSI:0.15353543	950	+	7104376	7104557	0	2	50,50	0,131
chrII	7123734	7123959	myoPSI:0.91419244	950	+	7123734	7123959	0	2	50,50	0,175
chrII	7123734	7123962	myoPSI:0.08580756	950	+	7123734	7123962	0	2	50,50	0,178
chrI	7141964	7142109	myoPSI:0.44189144	950	-	7141964	7142109	0	2	50,50	0,95
chrI	7141955	7142109	myoPSI:0.55810856	950	-	7141955	7142109	0	2	50,50	0,104
chrX	7225582	7225816	myoPSI:0.80833333	950	+	7225582	7225816	0	2	50,50	0,184
chrX	7225538	7225816	myoPSI:0.19166667	950	+	7225538	7225816	0	2	50,50	0,228
chrI	7304146	7304297	myoPSI:0.42704683	950	-	7304146	7304297	0	2	50,50	0,101
chrI	7304146	7304293	myoPSI:0.57295317	950	-	7304146	7304293	0	2	50,50	0,97
chrIII	7310188	7310407	myoPSI:0.56086221	950	-	7310188	7310407	0	2	50,50	0,169
chrIII	7310227	7310407	myoPSI:0.43913779	950	-	7310227	7310407	0	2	50,50	0,130
chrV	7434552	7434894	myoPSI:0.76550022	950	-	7434552	7434894	0	2	50,50	0,292
chrV	7434552	7434889	myoPSI:0.23449978	950	-	7434552	7434889	0	2	50,50	0,287
chrIV	7550977	7551418	myoPSI:0.62457454	950	+	7550977	7551418	0	2	50,50	0,391
chrIV	7550977	7551424	myoPSI:0.37542546	950	+	7550977	7551424	0	2	50,50	0,397
chrII	7597966	7598130	myoPSI:0.82656204	950	-	7597966	7598130	0	2	50,50	0,114
chrII	7597963	7598130	myoPSI:0.17343796	950	-	7597963	7598130	0	2	50,50	0,117
chrI	7600283	7600460	myoPSI:0.87633851	950	+	7600283	7600460	0	2	50,50	0,127
chrI	7600283	7600484	myoPSI:0.12366149	950	+	7600283	7600484	0	2	50,50	0,151
chrI	7696603	7696751	myoPSI:0.69497071	950	+	7696603	7696751	0	2	50,50	0,98
chrI	7696603	7696742	myoPSI:0.30502929	950	+	7696603	7696742	0	2	50,50	0,89
chrI	7705416	7706016	myoPSI:0.18801158	950	-	7705416	7706016	0	2	50,50	0,550
chrI	7705410	7706016	myoPSI:0.81198842	950	-	7705410	7706016	0	2	50,50	0,556
chrIII	7794308	7794678	myoPSI:0.11351039	950	-	7794308	7794678	0	2	50,50	0,320
chrIII	7794293	7794678	myoPSI:0.88648961	950	-	7794293	7794678	0	2	50,50	0,335
chrII	7816732	7816874	myoPSI:0.23021060	950	+	7816732	7816874	0	2	50,50	0,92
chrII	7816732	7816877	myoPSI:0.76978940	950	+	7816732	7816877	0	2	50,50	0,95
chrI	7847343	7847498	myoPSI:0.27455621	950	-	7847343	7847498	0	2	50,50	0,105
chrI	7847343	7847494	myoPSI:0.72544379	950	-	7847343	7847494	0	2	50,50	0,101
chrIV	7852967	7853129	myoPSI:0.46767677	950	+	7852967	7853129	0	2	50,50	0,112
chrIV	7852967	7853120	myoPSI:0.53232323	950	+	7852967	7853120	0	2	50,50	0,103
chrV	7855848	7855993	myoPSI:0.08426234	950	+	7855848	7855993	0	2	50,50	0,95
chrV	7855848	7856003	myoPSI:0.91573766	950	+	7855848	7856003	0	2	50,50	0,105
chrIII	7857050	7857200	myoPSI:0.30804355	950	-	7857050	7857200	0	2	50,50	0,100
chrIII	7857056	7857200	myoPSI:0.69195645	950	-	7857056	7857200	0	2	50,50	0,94
chrV	7875868	7876489	myoPSI:0.67528736	950	+	7875868	7876489	0	2	50,50	0,571
chrV	7875886	7876489	myoPSI:0.32471264	950	+	7875886	7876489	0	2	50,50	0,553
chrIII	7885596	7885847	myoPSI:0.25216736	950	-	7885596	7885847	0	2	50,50	0,201
chrIII	7885552	7885847	myoPSI:0.74783264	950	-	7885552	7885847	0	2	50,50	0,245
chrV	8012689	8012899	myoPSI:0.79731252	950	-	8012689	8012899	0	2	50,50	0,160
chrV	8012695	8012899	myoPSI:0.20268748	950	-	8012695	8012899	0	2	50,50	0,154
chrI	8017205	8017833	myoPSI:0.48194662	950	+	8017205	8017833	0	2	50,50	0,578
chrI	8017181	8017833	myoPSI:0.51805338	950	+	8017181	8017833	0	2	50,50	0,602
chrIV	8085228	8085802	myoPSI:0.26190476	950	-	8085228	8085802	0	2	50,50	0,524
chrIV	8085183	8085802	myoPSI:0.73809524	950	-	8085183	8085802	0	2	50,50	0,569
chrII	8121512	8121822	myoPSI:0.62564599	950	+	8121512	8121822	0	2	50,50	0,260
chrII	8121512	8121873	myoPSI:0.37435401	950	+	8121512	8121873	0	2	50,50	0,311
chrI	8290382	8290532	myoPSI:0.58410129	950	-	8290382	8290532	0	2	50,50	0,100
chrI	8290379	8290532	myoPSI:0.41589871	950	-	8290379	8290532	0	2	50,50	0,103
chrIII	8332226	8332369	myoPSI:0.84707965	950	+	8332226	8332369	0	2	50,50	0,93
chrIII	8332226	8332372	myoPSI:0.15292035	950	+	8332226	8332372	0	2	50,50	0,96
chrV	8385507	8385917	myoPSI:0.39061239	950	-	8385507	8385917	0	2	50,50	0,360
chrV	8385504	8385917	myoPSI:0.60938761	950	-	8385504	8385917	0	2	50,50	0,363
chrIII	8406056	8406421	myoPSI:0.42438236	950	+	8406056	8406421	0	2	50,50	0,315
chrIII	8406056	8406415	myoPSI:0.57561764	950	+	8406056	8406415	0	2	50,50	0,309
chrII	8442750	8442890	myoPSI:0.12030268	950	+	8442750	8442890	0	2	50,50	0,90
chrII	8442750	8442896	myoPSI:0.87969732	950	+	8442750	8442896	0	2	50,50	0,96
chrX	8474257	8474411	myoPSI:0.62720588	950	-	8474257	8474411	0	2	50,50	0,104
chrX	8474265	8474411	myoPSI:0.37279412	950	-	8474265	8474411	0	2	50,50	0,96
chrIII	8487470	8487749	myoPSI:0.58341189	950	+	8487470	8487749	0	2	50,50	0,229
chrIII	8487470	8487797	myoPSI:0.41658811	950	+	8487470	8487797	0	2	50,50	0,277
chrV	8514812	8514961	myoPSI:0.72157964	950	-	8514812	8514961	0	2	50,50	0,99
chrV	8514821	8514961	myoPSI:0.27842036	950	-	8514821	8514961	0	2	50,50	0,90
chrIV	8536729	8536954	myoPSI:0.12862772	950	+	8536729	8536954	0	2	50,50	0,175
chrIV	8536657	8536954	myoPSI:0.87137228	950	+	8536657	8536954	0	2	50,50	0,247
chrIV	8609243	8609475	myoPSI:0.13870219	950	+	8609243	8609475	0	2	50,50	0,182
chrIV	8609259	8609475	myoPSI:0.86129781	950	+	8609259	8609475	0	2	50,50	0,166
chrV	8629749	8629892	myoPSI:0.34421044	950	-	8629749	8629892	0	2	50,50	0,93
chrV	8629738	8629892	myoPSI:0.65578956	950	-	8629738	8629892	0	2	50,50	0,104
chrI	8741074	8741247	myoPSI:0.53809995	950	+	8741074	8741247	0	2	50,50	0,123
chrI	8741074	8741238	myoPSI:0.46190005	950	+	8741074	8741238	0	2	50,50	0,114
chrII	8784998	8785187	myoPSI:0.39140361	950	+	8784998	8785187	0	2	50,50	0,139
chrII	8784998	8785194	myoPSI:0.60859639	950	+	8784998	8785194	0	2	50,50	0,146
chrIV	8792392	8792607	myoPSI:0.49102830	950	-	8792392	8792607	0	2	50,50	0,165
chrIV	8792392	8792616	myoPSI:0.50897170	950	-	8792392	8792616	0	2	50,50	0,174
chrIV	8891922	8892098	myoPSI:0.34811661	950	+	8891922	8892098	0	2	50,50	0,126
chrIV	8891922	8892095	myoPSI:0.65188339	950	+	8891922	8892095	0	2	50,50	0,123
chrII	8931044	8932155	myoPSI:0.57287394	950	+	8931044	8932155	0	2	50,50	0,1061
chrII	8931140	8932155	myoPSI:0.42712606	950	+	8931140	8932155	0	2	50,50	0,965
chrII	8998839	8998982	myoPSI:0.33246528	950	+	8998839	8998982	0	2	50,50	0,93
chrII	8998839	8998991	myoPSI:0.66753472	950	+	8998839	8998991	0	2	50,50	0,102
chrIII	9044117	9044260	myoPSI:0.09177386	950	-	9044117	9044260	0	2	50,50	0,93
chrIII	9044111	9044260	myoPSI:0.90822614	950	-	9044111	9044260	0	2	50,50	0,99
chrIII	9052321	9052471	myoPSI:0.73400203	950	-	9052321	9052471	0	2	50,50	0,100
chrIII	9052327	9052471	myoPSI:0.26599797	950	-	9052327	9052471	0	2	50,50	0,94
chrIII	9058171	9058322	myoPSI:0.58144062	950	+	9058171	9058322	0	2	50,50	0,101
chrIII	9058171	9058313	myoPSI:0.41855938	950	+	9058171	9058313	0	2	50,50	0,92
chrIV	9086618	9087328	myoPSI:0.65521705	950	+	9086618	9087328	0	2	50,50	0,660
chrIV	9086618	9087370	myoPSI:0.34478295	950	+	9086618	9087370	0	2	50,50	0,702
chrI	9102847	9103096	myoPSI:0.59981869	950	-	9102847	9103096	0	2	50,50	0,199
chrI	9102847	9103048	myoPSI:0.40018131	950	-	9102847	9103048	0	2	50,50	0,151
chrIV	9145385	9145570	myoPSI:0.52055692	950	+	9145385	9145570	0	2	50,50	0,135
chrIV	9145385	9145537	myoPSI:0.47944308	950	+	9145385	9145537	0	2	50,50	0,102
chrX	9344256	9344409	myoPSI:0.34743590	950	-	9344256	9344409	0	2	50,50	0,103
chrX	9344256	9344415	myoPSI:0.65256410	950	-	9344256	9344415	0	2	50,50	0,109
chrIII	9384314	9384456	myoPSI:0.40016722	950	-	9384314	9384456	0	2	50,50	0,92
chrIII	9384305	9384456	myoPSI:0.59983278	950	-	9384305	9384456	0	2	50,50	0,101
chrIII	9491679	9492189	myoPSI:0.20342523	950	+	9491679	9492189	0	2	50,50	0,460
chrIII	9491679	9491940	myoPSI:0.79657477	950	+	9491679	9491940	0	2	50,50	0,211
chrX	9515279	9515429	myoPSI:0.22333916	950	+	9515279	9515429	0	2	50,50	0,100
chrX	9515279	9515423	myoPSI:0.77666084	950	+	9515279	9515423	0	2	50,50	0,94
chrX	9563271	9563413	myoPSI:0.32418678	950	-	9563271	9563413	0	2	50,50	0,92
chrX	9563264	9563413	myoPSI:0.67581322	950	-	9563264	9563413	0	2	50,50	0,99
chrIII	9623726	9623879	myoPSI:0.86263736	950	+	9623726	9623879	0	2	50,50	0,103
chrIII	9623726	9623885	myoPSI:0.13736264	950	+	9623726	9623885	0	2	50,50	0,109
chrI	9743059	9743436	myoPSI:0.74688260	950	+	9743059	9743436	0	2	50,50	0,327
chrI	9743059	9743442	myoPSI:0.25311740	950	+	9743059	9743442	0	2	50,50	0,333
chrII	9749753	9749905	myoPSI:0.37679641	950	+	9749753	9749905	0	2	50,50	0,102
chrII	9749753	9749898	myoPSI:0.62320359	950	+	9749753	9749898	0	2	50,50	0,95
chrIII	9773108	9773467	myoPSI:0.69086687	950	+	9773108	9773467	0	2	50,50	0,309
chrIII	9773108	9773380	myoPSI:0.30913313	950	+	9773108	9773380	0	2	50,50	0,222
chrV	9776274	9776712	myoPSI:0.21978886	950	-	9776274	9776712	0	2	50,50	0,388
chrV	9776267	9776712	myoPSI:0.78021114	950	-	9776267	9776712	0	2	50,50	0,395
chrI	9872999	9873148	myoPSI:0.64912448	950	+	9872999	9873148	0	2	50,50	0,99
chrI	9872996	9873148	myoPSI:0.35087552	950	+	9872996	9873148	0	2	50,50	0,102
chrI	9880156	9880311	myoPSI:0.61574074	950	-	9880156	9880311	0	2	50,50	0,105
chrI	9880165	9880311	myoPSI:0.38425926	950	-	9880165	9880311	0	2	50,50	0,96
chrII	9930281	9930503	myoPSI:0.34473878	950	+	9930281	9930503	0	2	50,50	0,172
chrII	9930281	9930497	myoPSI:0.65526122	950	+	9930281	9930497	0	2	50,50	0,166
chrIII	9951529	9951742	myoPSI:0.65570600	950	-	9951529	9951742	0	2	50,50	0,163
chrIII	9951529	9951800	myoPSI:0.34429400	950	-	9951529	9951800	0	2	50,50	0,221
chrX	9993171	9993680	myoPSI:0.66350575	950	-	9993171	9993680	0	2	50,50	0,459
chrX	9993239	9993680	myoPSI:0.33649425	950	-	9993239	9993680	0	2	50,50	0,391
chrI	10020373	10020522	myoPSI:0.38671024	950	+	10020373	10020522	0	2	50,50	0,99
chrI	10020373	10020515	myoPSI:0.61328976	950	+	10020373	10020515	0	2	50,50	0,92
chrX	10063399	10063550	myoPSI:0.19626758	950	-	10063399	10063550	0	2	50,50	0,101
chrX	10063399	10063562	myoPSI:0.80373242	950	-	10063399	10063562	0	2	50,50	0,113
chrV	10253867	10254133	myoPSI:0.05817784	950	-	10253867	10254133	0	2	50,50	0,216
chrV	10253867	10254065	myoPSI:0.94182216	950	-	10253867	10254065	0	2	50,50	0,148
chrIII	10253620	10254486	myoPSI:0.51631563	950	+	10253620	10254486	0	2	50,50	0,816
chrIII	10253614	10254486	myoPSI:0.48368437	950	+	10253614	10254486	0	2	50,50	0,822
chrII	10386649	10386805	myoPSI:0.17914810	950	+	10386649	10386805	0	2	50,50	0,106
chrII	10386649	10386793	myoPSI:0.82085190	950	+	10386649	10386793	0	2	50,50	0,94
chrV	10426210	10426362	myoPSI:0.40656566	950	-	10426210	10426362	0	2	50,50	0,102
chrV	10426205	10426362	myoPSI:0.59343434	950	-	10426205	10426362	0	2	50,50	0,107
chrI	10445365	10445577	myoPSI:0.64855072	950	-	10445365	10445577	0	2	50,50	0,162
chrI	10445350	10445577	myoPSI:0.35144928	950	-	10445350	10445577	0	2	50,50	0,177
chrIII	10467204	10467361	myoPSI:0.68811189	950	+	10467204	10467361	0	2	50,50	0,107
chrIII	10467204	10467353	myoPSI:0.31188811	950	+	10467204	10467353	0	2	50,50	0,99
chrI	10581777	10582466	myoPSI:0.85444450	950	-	10581777	10582466	0	2	50,50	0,639
chrI	10581786	10582466	myoPSI:0.14555550	950	-	10581786	10582466	0	2	50,50	0,630
chrV	10599420	10599566	myoPSI:0.28214286	950	+	10599420	10599566	0	2	50,50	0,96
chrV	10599423	10599566	myoPSI:0.71785714	950	+	10599423	10599566	0	2	50,50	0,93
chrIII	10740556	10740694	myoPSI:0.07349830	950	-	10740556	10740694	0	2	50,50	0,88
chrIII	10740547	10740694	myoPSI:0.92650170	950	-	10740547	10740694	0	2	50,50	0,97
chrV	10768583	10768727	myoPSI:0.93130589	950	-	10768583	10768727	0	2	50,50	0,94
chrV	10768583	10768744	myoPSI:0.06869411	950	-	10768583	10768744	0	2	50,50	0,111
chrII	10796915	10797067	myoPSI:0.64714680	950	-	10796915	10797067	0	2	50,50	0,102
chrII	10796924	10797067	myoPSI:0.35285320	950	-	10796924	10797067	0	2	50,50	0,93
chrI	10934186	10934950	myoPSI:0.60241228	950	-	10934186	10934950	0	2	50,50	0,714
chrI	10934189	10934950	myoPSI:0.39758772	950	-	10934189	10934950	0	2	50,50	0,711
chrI	10941253	10941623	myoPSI:0.40068856	950	+	10941253	10941623	0	2	50,50	0,320
chrI	10941253	10941632	myoPSI:0.59931144	950	+	10941253	10941632	0	2	50,50	0,329
chrV	10959877	10960025	myoPSI:0.83843382	950	-	10959877	10960025	0	2	50,50	0,98
chrV	10959877	10960027	myoPSI:0.16156618	950	-	10959877	10960027	0	2	50,50	0,100
chrII	11299986	11300413	myoPSI:0.64706331	950	+	11299986	11300413	0	2	50,50	0,377
chrII	11300163	11300413	myoPSI:0.35293669	950	+	11300163	11300413	0	2	50,50	0,200
chrIII	11388735	11389444	myoPSI:0.29401029	950	-	11388735	11389444	0	2	50,50	0,659
chrIII	11388735	11389334	myoPSI:0.70598971	950	-	11388735	11389334	0	2	50,50	0,549
chrII	11452176	11452565	myoPSI:0.90596591	950	-	11452176	11452565	0	2	50,50	0,339
chrII	11452321	11452565	myoPSI:0.09403409	950	-	11452321	11452565	0	2	50,50	0,194
chrII	11471713	11472007	myoPSI:0.86873638	950	-	11471713	11472007	0	2	50,50	0,244
chrII	11471719	11472007	myoPSI:0.13126362	950	-	11471719	11472007	0	2	50,50	0,238
chrV	11506335	11506920	myoPSI:0.30140300	950	+	11506335	11506920	0	2	50,50	0,535
chrV	11506335	11506926	myoPSI:0.69859700	950	+	11506335	11506926	0	2	50,50	0,541
chrX	11546326	11546478	myoPSI:0.42059891	950	-	11546326	11546478	0	2	50,50	0,102
chrX	11546335	11546478	myoPSI:0.57940109	950	-	11546335	11546478	0	2	50,50	0,93
chrIV	11605568	11605715	myoPSI:0.24718045	950	+	11605568	11605715	0	2	50,50	0,97
chrIV	11605568	11605709	myoPSI:0.75281955	950	+	11605568	11605709	0	2	50,50	0,91
chrV	11781269	11781464	myoPSI:0.18227209	950	+	11781269	11781464	0	2	50,50	0,145
chrV	11781269	11781470	myoPSI:0.81772791	950	+	11781269	11781470	0	2	50,50	0,151
chrII	11919575	11919727	myoPSI:0.63500000	950	-	11919575	11919727	0	2	50,50	0,102
chrII	11919587	11919727	myoPSI:0.36500000	950	-	11919587	11919727	0	2	50,50	0,90
chrV	12057429	12057576	myoPSI:0.56625578	950	-	12057429	12057576	0	2	50,50	0,97
chrV	12057435	12057585	myoPSI:0.43374422	950	-	12057435	12057585	0	2	50,50	0,100
chrII	12209789	12210862	myoPSI:0.17558502	950	-	12209789	12210862	0	2	50,50	0,1023
chrII	12209780	12210862	myoPSI:0.82441498	950	-	12209780	12210862	0	2	50,50	0,1032
chrII	12214837	12215705	myoPSI:0.52500000	950	-	12214837	12215705	0	2	50,50	0,818
chrII	12214906	12215705	myoPSI:0.47500000	950	-	12214906	12215705	0	2	50,50	0,749
chrX	12401487	12401636	myoPSI:0.83150685	950	-	12401487	12401636	0	2	50,50	0,99
chrX	12401487	12401642	myoPSI:0.16849315	950	-	12401487	12401642	0	2	50,50	0,105
chrV	12502182	12502613	myoPSI:0.34926014	950	+	12502182	12502613	0	2	50,50	0,381
chrV	12502182	12502619	myoPSI:0.65073986	950	+	12502182	12502619	0	2	50,50	0,387
chrX	12505261	12505656	myoPSI:0.77479238	950	-	12505261	12505656	0	2	50,50	0,345
chrX	12505222	12505656	myoPSI:0.22520762	950	-	12505222	12505656	0	2	50,50	0,384
chrV	12541930	12542325	myoPSI:0.56242350	950	+	12541930	12542325	0	2	50,50	0,345
chrV	12541938	12542325	myoPSI:0.43757650	950	+	12541938	12542325	0	2	50,50	0,337
chrI	12567326	12568255	myoPSI:0.52699983	950	-	12567326	12568255	0	2	50,50	0,879
chrI	12567326	12568234	myoPSI:0.47300017	950	-	12567326	12568234	0	2	50,50	0,858
chrIV	12585309	12585451	myoPSI:0.91817739	950	-	12585309	12585451	0	2	50,50	0,92
chrIV	12585309	12585466	myoPSI:0.08182261	950	-	12585309	12585466	0	2	50,50	0,107
chrV	13087120	13087274	myoPSI:0.83382852	950	+	13087120	13087274	0	2	50,50	0,104
chrV	13087120	13087257	myoPSI:0.16617148	950	+	13087120	13087257	0	2	50,50	0,87
chrIV	13097779	13097923	myoPSI:0.17036713	950	-	13097779	13097923	0	2	50,50	0,94
chrIV	13097773	13097923	myoPSI:0.82963287	950	-	13097773	13097923	0	2	50,50	0,100
chrIV	13151057	13152035	myoPSI:0.37639311	950	-	13151057	13152035	0	2	50,50	0,928
chrIV	13150731	13152035	myoPSI:0.62360689	950	-	13150731	13152035	0	2	50,50	0,1254
chrII	13281463	13282621	myoPSI:0.21002085	950	-	13281463	13282621	0	2	50,50	0,1108
chrII	13281457	13282621	myoPSI:0.78997915	950	-	13281457	13282621	0	2	50,50	0,1114
chrI	13282351	13282503	myoPSI:0.79868742	950	-	13282351	13282503	0	2	50,50	0,102
chrI	13282357	13282503	myoPSI:0.20131258	950	-	13282357	13282503	0	2	50,50	0,96
chrI	13282649	13283823	myoPSI:0.83522727	950	-	13282649	13283823	0	2	50,50	0,1124
chrI	13282643	13283823	myoPSI:0.16477273	950	-	13282643	13283823	0	2	50,50	0,1130
chrIV	13298502	13298775	myoPSI:0.65502840	950	+	13298502	13298775	0	2	50,50	0,223
chrIV	13298565	13298775	myoPSI:0.34497160	950	+	13298565	13298775	0	2	50,50	0,160
chrIV	13302848	13302986	myoPSI:0.14387626	950	+	13302848	13302986	0	2	50,50	0,88
chrIV	13302848	13303001	myoPSI:0.85612374	950	+	13302848	13303001	0	2	50,50	0,103
chrI	13311634	13311851	myoPSI:0.51911495	950	-	13311634	13311851	0	2	50,50	0,167
chrI	13311628	13311851	myoPSI:0.48088505	950	-	13311628	13311851	0	2	50,50	0,173
chrX	13329340	13329483	myoPSI:0.79217342	950	+	13329340	13329483	0	2	50,50	0,93
chrX	13329340	13329489	myoPSI:0.20782658	950	+	13329340	13329489	0	2	50,50	0,99
chrV	13387593	13387743	myoPSI:0.72618089	950	-	13387593	13387743	0	2	50,50	0,100
chrV	13387593	13387734	myoPSI:0.27381911	950	-	13387593	13387734	0	2	50,50	0,91
chrIV	13390925	13392396	myoPSI:0.70066148	950	-	13390925	13392396	0	2	50,50	0,1421
chrIV	13390925	13392390	myoPSI:0.29933852	950	-	13390925	13392390	0	2	50,50	0,1415
chrII	13502625	13503687	myoPSI:0.23809524	950	+	13502625	13503687	0	2	50,50	0,1012
chrII	13502612	13503687	myoPSI:0.76190476	950	+	13502612	13503687	0	2	50,50	0,1025
chrX	13553240	13553453	myoPSI:0.60434964	950	-	13553240	13553453	0	2	50,50	0,163
chrX	13553243	13553453	myoPSI:0.39565036	950	-	13553243	13553453	0	2	50,50	0,160
chrX	13625694	13625837	myoPSI:0.44003868	950	-	13625694	13625837	0	2	50,50	0,93
chrX	13625685	13625837	myoPSI:0.55996132	950	-	13625685	13625837	0	2	50,50	0,102
chrV	13663676	13663921	myoPSI:0.22394338	950	+	13663676	13663921	0	2	50,50	0,195
chrV	13663718	13663921	myoPSI:0.77605662	950	+	13663718	13663921	0	2	50,50	0,153
chrIII	13691065	13691659	myoPSI:0.23242248	950	+	13691065	13691659	0	2	50,50	0,544
chrIII	13691065	13691665	myoPSI:0.76757752	950	+	13691065	13691665	0	2	50,50	0,550
chrV	13965019	13965161	myoPSI:0.06450356	950	+	13965019	13965161	0	2	50,50	0,92
chrV	13965019	13965167	myoPSI:0.93549644	950	+	13965019	13965167	0	2	50,50	0,98
chrII	13971012	13971372	myoPSI:0.69304265	950	-	13971012	13971372	0	2	50,50	0,310
chrII	13970743	13971372	myoPSI:0.30695735	950	-	13970743	13971372	0	2	50,50	0,579
chrV	14035938	14036094	myoPSI:0.63649425	950	-	14035938	14036094	0	2	50,50	0,106
chrV	14035947	14036094	myoPSI:0.36350575	950	-	14035947	14036094	0	2	50,50	0,97
chrIV	14062974	14063120	myoPSI:0.60572012	950	-	14062974	14063120	0	2	50,50	0,96
chrIV	14062980	14063120	myoPSI:0.39427988	950	-	14062980	14063120	0	2	50,50	0,90
chrV	14101802	14101959	myoPSI:0.30018248	950	+	14101802	14101959	0	2	50,50	0,107
chrV	14101811	14101959	myoPSI:0.69981752	950	+	14101811	14101959	0	2	50,50	0,98
chrV	14196236	14196382	myoPSI:0.35015509	950	+	14196236	14196382	0	2	50,50	0,96
chrV	14196236	14196388	myoPSI:0.64984491	950	+	14196236	14196388	0	2	50,50	0,102
chrIV	14365675	14366896	myoPSI:0.90181915	950	+	14365675	14366896	0	2	50,50	0,1171
chrIV	14365660	14366896	myoPSI:0.09818085	950	+	14365660	14366896	0	2	50,50	0,1186
chrII	14400701	14400841	myoPSI:0.25062159	950	+	14400701	14400841	0	2	50,50	0,90
chrII	14400701	14400847	myoPSI:0.74937841	950	+	14400701	14400847	0	2	50,50	0,96
chrIV	14657140	14657307	myoPSI:0.61055354	950	+	14657140	14657307	0	2	50,50	0,117
chrIV	14657140	14657295	myoPSI:0.38944646	950	+	14657140	14657295	0	2	50,50	0,105
chrX	14817575	14817724	myoPSI:0.55164218	950	-	14817575	14817724	0	2	50,50	0,99
chrX	14817569	14817724	myoPSI:0.44835782	950	-	14817569	14817724	0	2	50,50	0,105
chrV	14830072	14830216	myoPSI:0.08695266	950	-	14830072	14830216	0	2	50,50	0,94
chrV	14830060	14830216	myoPSI:0.91304734	950	-	14830060	14830216	0	2	50,50	0,106
chrX	14848381	14848536	myoPSI:0.25951493	950	+	14848381	14848536	0	2	50,50	0,105
chrX	14848381	14848529	myoPSI:0.74048507	950	+	14848381	14848529	0	2	50,50	0,98
chrV	14908124	14908687	myoPSI:0.79475090	950	-	14908124	14908687	0	2	50,50	0,513
chrV	14908124	14908720	myoPSI:0.20524910	950	-	14908124	14908720	0	2	50,50	0,546
chrV	14937114	14937856	myoPSI:0.56445834	950	+	14937114	14937856	0	2	50,50	0,692
chrV	14937114	14937862	myoPSI:0.43554166	950	+	14937114	14937862	0	2	50,50	0,698
chrI	15037957	15038102	myoPSI:0.59140461	950	+	15037957	15038102	0	2	50,50	0,95
chrI	15037957	15038111	myoPSI:0.40859539	950	+	15037957	15038111	0	2	50,50	0,104
chrV	15575024	15575388	myoPSI:0.23057239	950	-	15575024	15575388	0	2	50,50	0,314
chrV	15575018	15575388	myoPSI:0.76942761	950	-	15575018	15575388	0	2	50,50	0,320
chrV	16370720	16370886	myoPSI:0.47786116	950	+	16370720	16370886	0	2	50,50	0,116
chrV	16370720	16370892	myoPSI:0.52213884	950	+	16370720	16370892	0	2	50,50	0,122
chrX	16537890	16538045	myoPSI:0.45925926	950	+	16537890	16538045	0	2	50,50	0,105
chrX	16537890	16538051	myoPSI:0.54074074	950	+	16537890	16538051	0	2	50,50	0,111
chrIV	16670625	16670767	myoPSI:0.35252404	950	+	16670625	16670767	0	2	50,50	0,92
chrIV	16670625	16670776	myoPSI:0.64747596	950	+	16670625	16670776	0	2	50,50	0,101
chrV	16928838	16928991	myoPSI:0.49692732	950	+	16928838	16928991	0	2	50,50	0,103
chrV	16928838	16928985	myoPSI:0.50307268	950	+	16928838	16928985	0	2	50,50	0,97
chrIV	17102156	17102353	myoPSI:0.94706056	950	-	17102156	17102353	0	2	50,50	0,147
chrIV	17102195	17102353	myoPSI:0.05293944	950	-	17102195	17102353	0	2	50,50	0,108
chrIV	17300095	17300323	myoPSI:0.39154318	950	+	17300095	17300323	0	2	50,50	0,178
chrIV	17300095	17300266	myoPSI:0.60845682	950	+	17300095	17300266	0	2	50,50	0,121
chrX	17522431	17523539	myoPSI:0.74281481	950	+	17522431	17523539	0	2	50,50	0,1058
chrX	17522431	17523524	myoPSI:0.25718519	950	+	17522431	17523524	0	2	50,50	0,1043
chrX	17523911	17524069	myoPSI:0.15442676	950	+	17523911	17524069	0	2	50,50	0,108
chrX	17523920	17524069	myoPSI:0.84557324	950	+	17523920	17524069	0	2	50,50	0,99
chrV	18090291	18091424	myoPSI:0.54454545	950	+	18090291	18091424	0	2	50,50	0,1083
chrV	18090291	18091379	myoPSI:0.45545455	950	+	18090291	18091379	0	2	50,50	0,1038
chrV	18202393	18203397	myoPSI:0.35510204	950	+	18202393	18203397	0	2	50,50	0,954
chrV	18202393	18203374	myoPSI:0.64489796	950	+	18202393	18203374	0	2	50,50	0,931
chrV	18693491	18695570	myoPSI:0.36407563	950	+	18693491	18695570	0	2	50,50	0,2029
chrV	18693491	18695579	myoPSI:0.63592437	950	+	18693491	18695579	0	2	50,50	0,2038
chrV	19121884	19122033	myoPSI:0.26539225	950	-	19121884	19122033	0	2	50,50	0,99
chrV	19121878	19122033	myoPSI:0.73460775	950	-	19121878	19122033	0	2	50,50	0,105
chrV	19918072	19919514	myoPSI:0.93670043	950	+	19918072	19919514	0	2	50,50	0,1392
chrV	19917991	19919514	myoPSI:0.06329957	950	+	19917991	19919514	0	2	50,50	0,1473
chrV	20784015	20784191	myoPSI:0.76143797	950	+	20784015	20784191	0	2	50,50	0,126
chrV	20784015	20784185	myoPSI:0.23856203	950	+	20784015	20784185	0	2	50,50	0,120
chrV	20791307	20791455	myoPSI:0.89113264	950	-	20791307	20791455	0	2	50,50	0,98
chrV	20791298	20791455	myoPSI:0.10886736	950	-	20791298	20791455	0	2	50,50	0,107
chrV	20792250	20792393	myoPSI:0.49125061	950	-	20792250	20792393	0	2	50,50	0,93
chrV	20792247	20792393	myoPSI:0.50874939	950	-	20792247	20792393	0	2	50,50	0,96
Alt Start/Terminal
track name=myo_AltST description='myo_AltST'
chrI	286370	287558	myoPSI:0.48962963	950	-	286370	287558	0	2	50,50	0,1138
chrI	286947	287558	myoPSI:0.51037037	950	-	286947	287558	0	2	50,50	0,561
chrII	3267737	3271243	myoPSI:0.69196526	950	+	3267737	3271243	0	2	50,50	0,3456
chrII	3269947	3271243	myoPSI:0.30803474	950	+	3269947	3271243	0	2	50,50	0,1246
chrI	3422383	3423929	myoPSI:0.35583942	950	+	3422383	3423929	0	2	50,50	0,1496
chrI	3422383	3423258	myoPSI:0.64416058	950	+	3422383	3423258	0	2	50,50	0,825
chrIV	3896528	3897066	myoPSI:0.33727881	950	+	3896528	3897066	0	2	50,50	0,488
chrIV	3896008	3897066	myoPSI:0.66272119	950	+	3896008	3897066	0	2	50,50	0,1008
chrIII	5344066	5344224	myoPSI:0.91176379	950	+	5344066	5344224	0	2	50,50	0,108
chrIII	5344066	5344211	myoPSI:0.08823621	950	+	5344066	5344211	0	2	50,50	0,95
chrV	7845693	7847043	myoPSI:0.54171439	950	-	7845693	7847043	0	2	50,50	0,1300
chrV	7845693	7846144	myoPSI:0.45828561	950	-	7845693	7846144	0	2	50,50	0,401
chrX	9383041	9383515	myoPSI:0.54032258	950	+	9383041	9383515	0	2	50,50	0,424
chrX	9383041	9385623	myoPSI:0.45967742	950	+	9383041	9385623	0	2	50,50	0,2532
chrIII	9857026	9859172	myoPSI:0.68816518	950	-	9857026	9859172	0	2	50,50	0,2096
chrIII	9857026	9858451	myoPSI:0.31183482	950	-	9857026	9858451	0	2	50,50	0,1375
chrIV	9996741	9997608	myoPSI:0.72283985	950	-	9996741	9997608	0	2	50,50	0,817
chrIV	9996741	9998883	myoPSI:0.27716015	950	-	9996741	9998883	0	2	50,50	0,2092
chrV	10130827	10130980	myoPSI:0.76093774	950	-	10130827	10130980	0	2	50,50	0,103
chrV	10130835	10130980	myoPSI:0.23906226	950	-	10130835	10130980	0	2	50,50	0,95
chrX	11998041	11998360	myoPSI:0.38717532	950	-	11998041	11998360	0	2	50,50	0,269
chrX	11998041	11998549	myoPSI:0.61282468	950	-	11998041	11998549	0	2	50,50	0,458
chrV	14627327	14627857	myoPSI:0.24430264	950	+	14627327	14627857	0	2	50,50	0,480
chrV	14621304	14627857	myoPSI:0.75569736	950	+	14621304	14627857	0	2	50,50	0,6503
chrV	16394513	16394848	myoPSI:0.35617060	950	-	16394513	16394848	0	2	50,50	0,285
chrV	16394513	16394908	myoPSI:0.64382940	950	-	16394513	16394908	0	2	50,50	0,345
chrIV	16432238	16436370	myoPSI:0.90566727	950	+	16432238	16436370	0	2	50,50	0,4082
chrIV	16434217	16436370	myoPSI:0.09433273	950	+	16434217	16436370	0	2	50,50	0,2103
chrX	16809548	16809748	myoPSI:0.57946201	950	-	16809548	16809748	0	2	50,50	0,150
chrX	16809548	16813585	myoPSI:0.42053799	950	-	16809548	16813585	0	2	50,50	0,3987
ME
track name=myo_ME description='myo_ME'
chrIII	4325305	4325468	myoPSI:0.48388413	950	-	4325305	4325468	0	2	50,50	0,113
chrIII	4325305	4325584	myoPSI:0.51611587	950	-	4325305	4325584	0	2	50,50	0,229
chrIII	4325473	4325795	myoPSI:0.35269492	950	-	4325473	4325795	0	2	50,50	0,272
chrIII	4325592	4325795	myoPSI:0.64730508	950	-	4325592	4325795	0	2	50,50	0,153
chrV	4505070	4505878	myoPSI:0.16116022	950	+	4505070	4505878	0	2	50,50	0,758
chrV	4505466	4505878	myoPSI:0.83883978	950	+	4505466	4505878	0	2	50,50	0,362
chrIII	6937424	6938461	myoPSI:0.60930818	950	+	6937424	6938461	0	2	50,50	0,987
chrIII	6937424	6937649	myoPSI:0.39069182	950	+	6937424	6937649	0	2	50,50	0,175
chrIII	6937683	6938958	myoPSI:0.38662849	950	+	6937683	6938958	0	2	50,50	0,1225
chrIII	6938495	6938958	myoPSI:0.61337151	950	+	6938495	6938958	0	2	50,50	0,413
chrI	7301376	7301712	myoPSI:0.20170298	950	-	7301376	7301712	0	2	50,50	0,286
chrI	7301376	7301956	myoPSI:0.79829702	950	-	7301376	7301956	0	2	50,50	0,530
chrI	7301724	7302121	myoPSI:0.23957490	950	-	7301724	7302121	0	2	50,50	0,347
chrI	7301977	7302121	myoPSI:0.76042510	950	-	7301977	7302121	0	2	50,50	0,94
chrIII	8909061	8909282	myoPSI:0.42706612	950	+	8909061	8909282	0	2	50,50	0,171
chrIII	8909061	8910130	myoPSI:0.57293388	950	+	8909061	8910130	0	2	50,50	0,1019
chrIII	8909305	8910383	myoPSI:0.35946249	950	+	8909305	8910383	0	2	50,50	0,1028
chrIII	8910171	8910383	myoPSI:0.64053751	950	+	8910171	8910383	0	2	50,50	0,162
chrIV	9925738	9926334	myoPSI:0.91587587	950	-	9925738	9926334	0	2	50,50	0,546
chrIV	9925738	9925993	myoPSI:0.08412413	950	-	9925738	9925993	0	2	50,50	0,205
chrV	10250626	10251376	myoPSI:0.36271401	950	+	10250626	10251376	0	2	50,50	0,700
chrV	10250626	10250890	myoPSI:0.63728599	950	+	10250626	10250890	0	2	50,50	0,214
chrV	10251483	10251726	myoPSI:0.33720930	950	+	10251483	10251726	0	2	50,50	0,193
chrV	10250982	10251726	myoPSI:0.66279070	950	+	10250982	10251726	0	2	50,50	0,694
chrIV	10338247	10338535	myoPSI:0.51511252	950	-	10338247	10338535	0	2	50,50	0,238
chrIV	10338247	10338753	myoPSI:0.48488748	950	-	10338247	10338753	0	2	50,50	0,456
chrIV	10338726	10338906	myoPSI:0.50756303	950	-	10338726	10338906	0	2	50,50	0,130
chrIV	10338508	10338906	myoPSI:0.49243697	950	-	10338508	10338906	0	2	50,50	0,348
chrIV	10494002	10494558	myoPSI:0.64497031	950	-	10494002	10494558	0	2	50,50	0,506
chrIV	10494002	10494880	myoPSI:0.35502969	950	-	10494002	10494880	0	2	50,50	0,828
chrIV	10494878	10495231	myoPSI:0.36910812	950	-	10494878	10495231	0	2	50,50	0,303
chrIV	10494577	10495231	myoPSI:0.63089188	950	-	10494577	10495231	0	2	50,50	0,604
chrIV	17478258	17478449	myoPSI:0.40158803	950	+	17478258	17478449	0	2	50,50	0,141
chrIV	17478258	17478904	myoPSI:0.59841197	950	+	17478258	17478904	0	2	50,50	0,596
chrIV	17478597	17479193	myoPSI:0.29672131	950	+	17478597	17479193	0	2	50,50	0,546
chrIV	17479052	17479193	myoPSI:0.70327869	950	+	17479052	17479193	0	2	50,50	0,91
IR
track name=myo_IR description='myo_IR'
chrIV	1603221	1603321	myoPSI:0.88936782	950	+	1603221	1603321	0	2	50,50	0,50
chrIV	1603169	1603321	myoPSI:0.11063218	950	+	1603169	1603321	0	2	50,50	0,102
chrIV	4016518	4016618	myoPSI:0.30529205	950	-	4016518	4016618	0	2	50,50	0,50
chrIV	4016518	4016683	myoPSI:0.69470795	950	-	4016518	4016683	0	2	50,50	0,115
chrIV	4050404	4050570	myoPSI:0.91217257	950	-	4050404	4050570	0	2	50,50	0,116
chrIV	4050404	4050504	myoPSI:0.08782743	950	-	4050404	4050504	0	2	50,50	0,50
chrIII	4165174	4165274	myoPSI:0.74942840	950	-	4165174	4165274	0	2	50,50	0,50
chrIII	4165174	4165325	myoPSI:0.25057160	950	-	4165174	4165325	0	2	50,50	0,101
chrII	4230341	4230441	myoPSI:0.90728385	950	+	4230341	4230441	0	2	50,50	0,50
chrII	4230204	4230441	myoPSI:0.09271615	950	+	4230204	4230441	0	2	50,50	0,187
chrIV	4448423	4448689	myoPSI:0.80896255	950	+	4448423	4448689	0	2	50,50	0,216
chrIV	4448589	4448689	myoPSI:0.19103745	950	+	4448589	4448689	0	2	50,50	0,50
chrIII	4557929	4558029	myoPSI:0.94544537	950	+	4557929	4558029	0	2	50,50	0,50
chrIII	4557851	4558029	myoPSI:0.05455463	950	+	4557851	4558029	0	2	50,50	0,128
chrII	4834674	4834818	myoPSI:0.49816176	950	-	4834674	4834818	0	2	50,50	0,94
chrII	4834674	4834774	myoPSI:0.50183824	950	-	4834674	4834774	0	2	50,50	0,50
chrI	5139509	5139665	myoPSI:0.81111741	950	-	5139509	5139665	0	2	50,50	0,106
chrI	5139509	5139609	myoPSI:0.18888259	950	-	5139509	5139609	0	2	50,50	0,50
chrIII	6003812	6003966	myoPSI:0.22685185	950	+	6003812	6003966	0	2	50,50	0,104
chrIII	6003866	6003966	myoPSI:0.77314815	950	+	6003866	6003966	0	2	50,50	0,50
chrII	6366343	6366443	myoPSI:0.07306857	950	+	6366343	6366443	0	2	50,50	0,50
chrII	6366298	6366443	myoPSI:0.92693143	950	+	6366298	6366443	0	2	50,50	0,95
chrIII	6962289	6962389	myoPSI:0.16476713	950	+	6962289	6962389	0	2	50,50	0,50
chrIII	6962162	6962389	myoPSI:0.83523287	950	+	6962162	6962389	0	2	50,50	0,177
chrIV	7558307	7558407	myoPSI:0.47993823	950	+	7558307	7558407	0	2	50,50	0,50
chrIV	7558272	7558426	myoPSI:0.52006177	950	+	7558272	7558426	0	2	50,50	0,104
chrX	8413649	8413796	myoPSI:0.78872404	950	+	8413649	8413796	0	2	50,50	0,97
chrX	8413696	8413796	myoPSI:0.21127596	950	+	8413696	8413796	0	2	50,50	0,50
chrI	9392360	9392460	myoPSI:0.81682429	950	-	9392360	9392460	0	2	50,50	0,50
chrI	9392360	9392512	myoPSI:0.18317571	950	-	9392360	9392512	0	2	50,50	0,102
chrIII	9462144	9462295	myoPSI:0.29867354	950	+	9462144	9462295	0	2	50,50	0,101
chrIII	9462195	9462295	myoPSI:0.70132646	950	+	9462195	9462295	0	2	50,50	0,50
chrI	10120131	10120277	myoPSI:0.11584841	950	-	10120131	10120277	0	2	50,50	0,96
chrI	10120131	10120231	myoPSI:0.88415159	950	-	10120131	10120231	0	2	50,50	0,50
chrIV	11820736	11820836	myoPSI:0.34536861	950	-	11820736	11820836	0	2	50,50	0,50
chrIV	11820730	11820874	myoPSI:0.65463139	950	-	11820730	11820874	0	2	50,50	0,94
chrV	12064430	12064530	myoPSI:0.20222448	950	-	12064430	12064530	0	2	50,50	0,50
chrV	12064430	12064912	myoPSI:0.79777552	950	-	12064430	12064912	0	2	50,50	0,432
chrIV	13559384	13559484	myoPSI:0.24438842	950	-	13559384	13559484	0	2	50,50	0,50
chrIV	13559384	13559529	myoPSI:0.75561158	950	-	13559384	13559529	0	2	50,50	0,95
chrIV	13607941	13608087	myoPSI:0.75105189	950	-	13607941	13608087	0	2	50,50	0,96
chrIV	13607941	13608041	myoPSI:0.24894811	950	-	13607941	13608041	0	2	50,50	0,50
chrV	14082945	14083096	myoPSI:0.83343843	950	+	14082945	14083096	0	2	50,50	0,101
chrV	14082981	14083081	myoPSI:0.16656157	950	+	14082981	14083081	0	2	50,50	0,50
Complex
track name=myo_Complex description='myo_Complex'
chrIV	363829	364025	myoPSI:0.16694034	950	-	363829	364025	0	2	50,50	0,146
chrIV	363823	364025	myoPSI:0.28968254	950	-	363823	364025	0	2	50,50	0,152
chrIV	363823	364258	myoPSI:0.54337712	950	-	363823	364258	0	2	50,50	0,385
chrIII	770460	770644	myoPSI:0.06173913	950	+	770460	770644	0	2	50,50	0,134
chrIII	770544	770644	myoPSI:0.93826087	950	+	770544	770644	0	2	50,50	0,50
chrIII	1940779	1943514	myoPSI:0.36097441	950	-	1940779	1943514	0	2	50,50	0,2685
chrIII	1941703	1943514	myoPSI:0.42208005	950	-	1941703	1943514	0	2	50,50	0,1761
chrIII	1939604	1943514	myoPSI:0.21694554	950	-	1939604	1943514	0	2	50,50	0,3860
chrX	3668221	3668372	myoPSI:0.71358025	950	-	3668221	3668372	0	2	50,50	0,101
chrX	3668272	3668372	myoPSI:0.28641975	950	-	3668272	3668372	0	2	50,50	0,50
chrII	2901790	2905683	myoPSI:0.24438068	950	-	2901790	2905683	0	2	50,50	0,3843
chrII	2901790	2903262	myoPSI:0.29316117	950	-	2901790	2903262	0	2	50,50	0,1422
chrII	2901790	2902472	myoPSI:0.46245815	950	-	2901790	2902472	0	2	50,50	0,632
chrV	5854923	5855239	myoPSI:0.32529528	950	-	5854923	5855239	0	2	50,50	0,266
chrV	5854923	5855254	myoPSI:0.33710630	950	-	5854923	5855254	0	2	50,50	0,281
chrV	5854929	5855239	myoPSI:0.33759843	950	-	5854929	5855239	0	2	50,50	0,260
chrI	4001452	4002392	myoPSI:0.18511150	950	-	4001452	4002392	0	2	50,50	0,890
chrI	4002047	4002147	myoPSI:0.81488850	950	-	4002047	4002147	0	2	50,50	0,50
chrI	4191622	4192728	myoPSI:0.09447368	950	+	4191622	4192728	0	2	50,50	0,1056
chrI	4191622	4191722	myoPSI:0.90552632	950	+	4191622	4191722	0	2	50,50	0,50
chrIII	4417389	4417692	myoPSI:0.16071057	950	-	4417389	4417692	0	2	50,50	0,253
chrIII	4417592	4417692	myoPSI:0.83928943	950	-	4417592	4417692	0	2	50,50	0,50
chrIV	3737867	3738832	myoPSI:0.39963280	950	-	3737867	3738832	0	2	50,50	0,915
chrIV	3737867	3738012	myoPSI:0.19522644	950	-	3737867	3738012	0	2	50,50	0,95
chrIV	3737867	3738759	myoPSI:0.40514076	950	-	3737867	3738759	0	2	50,50	0,842
chrII	5339916	5340084	myoPSI:0.06083112	950	+	5339916	5340084	0	2	50,50	0,118
chrII	5339984	5340084	myoPSI:0.93916888	950	+	5339984	5340084	0	2	50,50	0,50
chrI	5429573	5429876	myoPSI:0.39258477	950	-	5429573	5429876	0	2	50,50	0,253
chrI	5429573	5429877	myoPSI:0.24862750	950	-	5429573	5429877	0	2	50,50	0,254
chrI	5429573	5429796	myoPSI:0.35878773	950	-	5429573	5429796	0	2	50,50	0,173
chrX	5973154	5973629	myoPSI:0.17436975	950	-	5973154	5973629	0	2	50,50	0,425
chrX	5973154	5977641	myoPSI:0.66228992	950	-	5973154	5977641	0	2	50,50	0,4437
chrX	5973154	5974233	myoPSI:0.16334034	950	-	5973154	5974233	0	2	50,50	0,1029
chrIII	6208140	6208462	myoPSI:0.94025566	950	+	6208140	6208462	0	2	50,50	0,272
chrIII	6208140	6208240	myoPSI:0.05974434	950	+	6208140	6208240	0	2	50,50	0,50
chrX	9563434	9563988	myoPSI:0.34192107	950	-	9563434	9563988	0	2	50,50	0,504
chrX	9563434	9564609	myoPSI:0.51568561	950	-	9563434	9564609	0	2	50,50	0,1125
chrX	9563434	9564098	myoPSI:0.14239332	950	-	9563434	9564098	0	2	50,50	0,614
chrIV	6977933	6978079	myoPSI:0.05412637	950	+	6977933	6978079	0	2	50,50	0,96
chrIV	6977970	6978070	myoPSI:0.94587363	950	+	6977970	6978070	0	2	50,50	0,50
chrII	7159562	7160443	myoPSI:0.91533688	950	+	7159562	7160443	0	2	50,50	0,831
chrII	7159583	7159683	myoPSI:0.08466312	950	+	7159583	7159683	0	2	50,50	0,50
chrI	5403915	5405364	myoPSI:0.38731061	950	-	5403915	5405364	0	2	50,50	0,1399
chrI	5403915	5404306	myoPSI:0.29015152	950	-	5403915	5404306	0	2	50,50	0,341
chrI	5403915	5404570	myoPSI:0.32253788	950	-	5403915	5404570	0	2	50,50	0,605
chrX	7266880	7267055	myoPSI:0.20139535	950	+	7266880	7267055	0	2	50,50	0,125
chrX	7266921	7267021	myoPSI:0.79860465	950	+	7266921	7267021	0	2	50,50	0,50
chrIII	10943039	10945688	myoPSI:0.48667543	950	+	10943039	10945688	0	2	50,50	0,2599
chrIII	10943039	10945754	myoPSI:0.06429823	950	+	10943039	10945754	0	2	50,50	0,2665
chrIII	10943099	10945688	myoPSI:0.44902635	950	+	10943099	10945688	0	2	50,50	0,2539
chrIV	7792059	7792203	myoPSI:0.12315634	950	-	7792059	7792203	0	2	50,50	0,94
chrIV	7792059	7792159	myoPSI:0.87684366	950	-	7792059	7792159	0	2	50,50	0,50
chrIV	5845554	5846027	myoPSI:0.81708211	950	-	5845554	5846027	0	2	50,50	0,423
chrIV	5845839	5845939	myoPSI:0.18291789	950	-	5845839	5845939	0	2	50,50	0,50
chrIV	6329962	6330209	myoPSI:0.80789474	950	+	6329962	6330209	0	2	50,50	0,197
chrIV	6329962	6330062	myoPSI:0.19210526	950	+	6329962	6330062	0	2	50,50	0,50
chrV	8513052	8513226	myoPSI:0.07380952	950	-	8513052	8513226	0	2	50,50	0,124
chrV	8513059	8513159	myoPSI:0.92619048	950	-	8513059	8513159	0	2	50,50	0,50
chrIII	8774150	8774361	myoPSI:0.89385447	950	+	8774150	8774361	0	2	50,50	0,161
chrIII	8774150	8774250	myoPSI:0.10614553	950	+	8774150	8774250	0	2	50,50	0,50
chrIV	8862451	8863898	myoPSI:0.11146724	950	-	8862451	8863898	0	2	50,50	0,1397
chrIV	8863447	8863898	myoPSI:0.27916990	950	-	8863447	8863898	0	2	50,50	0,401
chrIV	8862435	8863898	myoPSI:0.60936286	950	-	8862435	8863898	0	2	50,50	0,1413
chrIII	9148876	9149126	myoPSI:0.58082932	950	-	9148876	9149126	0	2	50,50	0,200
chrIII	9149026	9149126	myoPSI:0.41917068	950	-	9149026	9149126	0	2	50,50	0,50
chrIV	7438548	7439105	myoPSI:0.81521894	950	+	7438548	7439105	0	2	50,50	0,507
chrIV	7438848	7439105	myoPSI:0.09288974	950	+	7438848	7439105	0	2	50,50	0,207
chrIV	7438273	7439105	myoPSI:0.09189131	950	+	7438273	7439105	0	2	50,50	0,782
chrIV	7443177	7443569	myoPSI:0.52141261	950	+	7443177	7443569	0	2	50,50	0,342
chrIV	7443061	7443569	myoPSI:0.35903109	950	+	7443061	7443569	0	2	50,50	0,458
chrIV	7442847	7443569	myoPSI:0.11955630	950	+	7442847	7443569	0	2	50,50	0,672
chrI	7837669	7838821	myoPSI:0.08507249	950	+	7837669	7838821	0	2	50,50	0,1102
chrI	7837876	7838821	myoPSI:0.17082513	950	+	7837876	7838821	0	2	50,50	0,895
chrI	7838642	7838821	myoPSI:0.74410238	950	+	7838642	7838821	0	2	50,50	0,129
chrII	10570955	10571881	myoPSI:0.09425807	950	+	10570955	10571881	0	2	50,50	0,876
chrII	10570955	10571455	myoPSI:0.15907047	950	+	10570955	10571455	0	2	50,50	0,450
chrII	10570955	10571870	myoPSI:0.74667145	950	+	10570955	10571870	0	2	50,50	0,865
chrV	11632614	11632761	myoPSI:0.69212939	950	-	11632614	11632761	0	2	50,50	0,97
chrV	11632411	11632761	myoPSI:0.20104432	950	-	11632411	11632761	0	2	50,50	0,300
chrV	11632521	11632761	myoPSI:0.10682629	950	-	11632521	11632761	0	2	50,50	0,190
chrV	11837494	11837800	myoPSI:0.55128670	950	+	11837494	11837800	0	2	50,50	0,256
chrV	11837490	11837685	myoPSI:0.11189691	950	+	11837490	11837685	0	2	50,50	0,145
chrV	11837523	11837685	myoPSI:0.33681639	950	+	11837523	11837685	0	2	50,50	0,112
chrX	11967356	11967623	myoPSI:0.08284250	950	+	11967356	11967623	0	2	50,50	0,217
chrX	11967360	11967460	myoPSI:0.91715750	950	+	11967360	11967460	0	2	50,50	0,50
chrV	18462876	18463521	myoPSI:0.06946791	950	+	18462876	18463521	0	2	50,50	0,595
chrV	18462892	18463521	myoPSI:0.09079392	950	+	18462892	18463521	0	2	50,50	0,579
chrV	18462921	18463521	myoPSI:0.83973818	950	+	18462921	18463521	0	2	50,50	0,550
chrIII	12336942	12337093	myoPSI:0.55434783	950	+	12336942	12337093	0	2	50,50	0,101
chrIII	12336993	12337093	myoPSI:0.44565217	950	+	12336993	12337093	0	2	50,50	0,50
chrX	12692686	12692839	myoPSI:0.54502688	950	+	12692686	12692839	0	2	50,50	0,103
chrX	12692686	12692786	myoPSI:0.45497312	950	+	12692686	12692786	0	2	50,50	0,50
chrIV	9925947	9927624	myoPSI:0.18198958	950	-	9925947	9927624	0	2	50,50	0,1627
chrIV	9924708	9927624	myoPSI:0.10359249	950	-	9924708	9927624	0	2	50,50	0,2866
chrIV	9927014	9927624	myoPSI:0.71441794	950	-	9927014	9927624	0	2	50,50	0,560
chrIV	10329145	10332319	myoPSI:0.11927662	950	-	10329145	10332319	0	2	50,50	0,3124
chrIV	10329145	10334176	myoPSI:0.14088705	950	-	10329145	10334176	0	2	50,50	0,4981
chrIV	10329151	10330720	myoPSI:0.09071530	950	-	10329151	10330720	0	2	50,50	0,1519
chrIV	10329151	10332319	myoPSI:0.12624773	950	-	10329151	10332319	0	2	50,50	0,3118
chrIV	10329151	10334176	myoPSI:0.45763791	950	-	10329151	10334176	0	2	50,50	0,4975
chrIV	10329145	10330720	myoPSI:0.06523540	950	-	10329145	10330720	0	2	50,50	0,1525
chrV	13964548	13964987	myoPSI:0.36449994	950	+	13964548	13964987	0	2	50,50	0,389
chrV	13964548	13964981	myoPSI:0.42723557	950	+	13964548	13964981	0	2	50,50	0,383
chrV	13964771	13964987	myoPSI:0.20826450	950	+	13964771	13964987	0	2	50,50	0,166
chrX	11512749	11516786	myoPSI:0.51993939	950	-	11512749	11516786	0	2	50,50	0,3987
chrX	11512749	11514740	myoPSI:0.25593939	950	-	11512749	11514740	0	2	50,50	0,1941
chrX	11512749	11512895	myoPSI:0.22412121	950	-	11512749	11512895	0	2	50,50	0,96
chrIII	11934130	11939021	myoPSI:0.12902161	950	-	11934130	11939021	0	2	50,50	0,4841
chrIII	11934130	11941214	myoPSI:0.38547660	950	-	11934130	11941214	0	2	50,50	0,7034
chrIII	11934130	11936963	myoPSI:0.48550179	950	-	11934130	11936963	0	2	50,50	0,2783
chrIV	12124126	12124296	myoPSI:0.42884554	950	+	12124126	12124296	0	2	50,50	0,120
chrIV	12124166	12124266	myoPSI:0.57115446	950	+	12124166	12124266	0	2	50,50	0,50
chrX	16930258	16930506	myoPSI:0.87568532	950	+	16930258	16930506	0	2	50,50	0,198
chrX	16930406	16930506	myoPSI:0.12431468	950	+	16930406	16930506	0	2	50,50	0,50
chrII	12810552	12810710	myoPSI:0.34082114	950	+	12810552	12810710	0	2	50,50	0,108
chrII	12809781	12810710	myoPSI:0.18605729	950	+	12809781	12810710	0	2	50,50	0,879
chrII	12809371	12810710	myoPSI:0.47312158	950	+	12809371	12810710	0	2	50,50	0,1289
chrV	19535105	19535932	myoPSI:0.84265374	950	-	19535105	19535932	0	2	50,50	0,777
chrV	19535105	19535817	myoPSI:0.06810527	950	-	19535105	19535817	0	2	50,50	0,662
chrV	19535105	19537484	myoPSI:0.08924098	950	-	19535105	19537484	0	2	50,50	0,2329
chrV	14830267	14833684	myoPSI:0.63457307	950	-	14830267	14833684	0	2	50,50	0,3367
chrV	14830267	14830576	myoPSI:0.19339379	950	-	14830267	14830576	0	2	50,50	0,259
chrV	14830267	14830810	myoPSI:0.17203314	950	-	14830267	14830810	0	2	50,50	0,493
chrI	14933923	14940950	myoPSI:0.23390447	950	+	14933923	14940950	0	2	50,50	0,6977
chrI	14919620	14940950	myoPSI:0.59860285	950	+	14919620	14940950	0	2	50,50	0,21280
chrI	14937096	14940950	myoPSI:0.16749268	950	+	14937096	14940950	0	2	50,50	0,3804
chrX	17678722	17679971	myoPSI:0.67758222	950	+	17678722	17679971	0	2	50,50	0,1199
chrX	17677194	17679971	myoPSI:0.07087581	950	+	17677194	17679971	0	2	50,50	0,2727
chrX	17679619	17679971	myoPSI:0.25154197	950	+	17679619	17679971	0	2	50,50	0,302

## Sheet: Intestine_AltSplicing
Intestine: alternative splicing events
Cassette
track name=ges_cassette description='ges_cassette'
chrV	38219	40503	gesPSI:0.58461627	950	+	38219	40503	0	2	50,50	0,2234
chrV	38219	39040	gesPSI:0.41538373	950	+	38219	39040	0	2	50,50	0,771
chrV	38976	40503	gesPSI:0.44325593	950	+	38976	40503	0	2	50,50	0,1477
chrII	96959	97108	gesPSI:0.16989664	950	-	96959	97108	0	2	50,50	0,99
chrII	96757	97108	gesPSI:0.83010336	950	-	96757	97108	0	2	50,50	0,301
chrII	96757	97005	gesPSI:0.06065876	950	-	96757	97005	0	2	50,50	0,198
chrIV	139545	139779	gesPSI:0.56645621	950	-	139545	139779	0	2	50,50	0,184
chrIV	139446	139779	gesPSI:0.43354379	950	-	139446	139779	0	2	50,50	0,283
chrIV	139446	139600	gesPSI:0.44912281	950	-	139446	139600	0	2	50,50	0,104
chrIV	140250	140592	gesPSI:0.82917558	950	-	140250	140592	0	2	50,50	0,292
chrIV	140400	140592	gesPSI:0.17082442	950	-	140400	140592	0	2	50,50	0,142
chrIV	140250	140428	gesPSI:0.34431096	950	-	140250	140428	0	2	50,50	0,128
chrII	167028	167223	gesPSI:0.23713266	950	+	167028	167223	0	2	50,50	0,145
chrII	167028	167953	gesPSI:0.76286734	950	+	167028	167953	0	2	50,50	0,875
chrII	167336	167953	gesPSI:0.31395829	950	+	167336	167953	0	2	50,50	0,567
chrII	223747	227985	gesPSI:0.83918074	950	-	223747	227985	0	2	50,50	0,4188
chrII	226724	227985	gesPSI:0.16081926	950	-	226724	227985	0	2	50,50	0,1211
chrII	223747	226663	gesPSI:0.32408850	950	-	223747	226663	0	2	50,50	0,2866
chrV	277990	278224	gesPSI:0.86292487	950	-	277990	278224	0	2	50,50	0,184
chrV	277319	278224	gesPSI:0.13707513	950	-	277319	278224	0	2	50,50	0,855
chrV	277319	278016	gesPSI:0.85080457	950	-	277319	278016	0	2	50,50	0,647
chrI	286947	287558	gesPSI:0.31444015	950	-	286947	287558	0	2	50,50	0,561
chrI	286370	287558	gesPSI:0.68555985	950	-	286370	287558	0	2	50,50	0,1138
chrI	286370	286923	gesPSI:0.39367394	950	-	286370	286923	0	2	50,50	0,503
chrIII	346059	346338	gesPSI:0.30896226	950	-	346059	346338	0	2	50,50	0,229
chrIII	345808	346338	gesPSI:0.69103774	950	-	345808	346338	0	2	50,50	0,480
chrIII	345808	346072	gesPSI:0.33422502	950	-	345808	346072	0	2	50,50	0,214
chrIII	347859	348094	gesPSI:0.86000000	950	-	347859	348094	0	2	50,50	0,185
chrIII	347387	348094	gesPSI:0.14000000	950	-	347387	348094	0	2	50,50	0,657
chrIII	347387	347890	gesPSI:0.89656319	950	-	347387	347890	0	2	50,50	0,453
chrIII	409946	410597	gesPSI:0.20778750	950	-	409946	410597	0	2	50,50	0,601
chrIII	410356	410597	gesPSI:0.79221250	950	-	410356	410597	0	2	50,50	0,191
chrIII	409946	410396	gesPSI:0.85690471	950	-	409946	410396	0	2	50,50	0,400
chrIII	593545	593976	gesPSI:0.45283168	950	-	593545	593976	0	2	50,50	0,381
chrIII	592093	593976	gesPSI:0.54716832	950	-	592093	593976	0	2	50,50	0,1833
chrIII	592093	593420	gesPSI:0.44347826	950	-	592093	593420	0	2	50,50	0,1277
chrX	612334	612757	gesPSI:0.31583333	950	-	612334	612757	0	2	50,50	0,373
chrX	611565	612757	gesPSI:0.68416667	950	-	611565	612757	0	2	50,50	0,1142
chrX	611565	612404	gesPSI:0.29267889	950	-	611565	612404	0	2	50,50	0,789
chrX	720873	722385	gesPSI:0.25847124	950	-	720873	722385	0	2	50,50	0,1462
chrX	722228	722385	gesPSI:0.74152876	950	-	722228	722385	0	2	50,50	0,107
chrX	720873	722202	gesPSI:0.75634757	950	-	720873	722202	0	2	50,50	0,1279
chrIII	729143	729629	gesPSI:0.58145936	950	-	729143	729629	0	2	50,50	0,436
chrIII	729408	729629	gesPSI:0.41854064	950	-	729408	729629	0	2	50,50	0,171
chrIII	729143	729367	gesPSI:0.35144436	950	-	729143	729367	0	2	50,50	0,174
chrIV	751238	751632	gesPSI:0.43295019	950	+	751238	751632	0	2	50,50	0,344
chrIV	751238	751430	gesPSI:0.56704981	950	+	751238	751430	0	2	50,50	0,142
chrIV	751384	751632	gesPSI:0.63427110	950	+	751384	751632	0	2	50,50	0,198
chrIII	882162	883640	gesPSI:0.47400051	950	-	882162	883640	0	2	50,50	0,1428
chrIII	882008	883640	gesPSI:0.52599949	950	-	882008	883640	0	2	50,50	0,1582
chrIII	882008	882155	gesPSI:0.51383103	950	-	882008	882155	0	2	50,50	0,97
chrIII	1068201	1070472	gesPSI:0.07648666	950	-	1068201	1070472	0	2	50,50	0,2221
chrIII	1067902	1070472	gesPSI:0.92351334	950	-	1067902	1070472	0	2	50,50	0,2520
chrIII	1067902	1068085	gesPSI:0.05501401	950	-	1067902	1068085	0	2	50,50	0,133
chrX	1115608	1116138	gesPSI:0.06136351	950	+	1115608	1116138	0	2	50,50	0,480
chrX	1115608	1116300	gesPSI:0.93863649	950	+	1115608	1116300	0	2	50,50	0,642
chrX	1116128	1116300	gesPSI:0.10030812	950	+	1116128	1116300	0	2	50,50	0,122
chrIII	1217759	1219436	gesPSI:0.28334411	950	-	1217759	1219436	0	2	50,50	0,1627
chrIII	1218742	1219436	gesPSI:0.71665589	950	-	1218742	1219436	0	2	50,50	0,644
chrIII	1217759	1218766	gesPSI:0.67003367	950	-	1217759	1218766	0	2	50,50	0,957
chrIII	1439607	1440100	gesPSI:0.21846847	950	+	1439607	1440100	0	2	50,50	0,443
chrIII	1439607	1439764	gesPSI:0.78153153	950	+	1439607	1439764	0	2	50,50	0,107
chrIII	1439917	1440100	gesPSI:0.74136578	950	+	1439917	1440100	0	2	50,50	0,133
chrIII	1534849	1536518	gesPSI:0.10714286	950	+	1534849	1536518	0	2	50,50	0,1619
chrIII	1534849	1535394	gesPSI:0.89285714	950	+	1534849	1535394	0	2	50,50	0,495
chrIII	1535466	1536518	gesPSI:0.89315500	950	+	1535466	1536518	0	2	50,50	0,1002
chrIV	1551722	1552423	gesPSI:0.18008595	950	+	1551722	1552423	0	2	50,50	0,651
chrIV	1551722	1551953	gesPSI:0.81991405	950	+	1551722	1551953	0	2	50,50	0,181
chrIV	1552076	1552423	gesPSI:0.80040647	950	+	1552076	1552423	0	2	50,50	0,297
chrIV	1568405	1569520	gesPSI:0.78643989	950	-	1568405	1569520	0	2	50,50	0,1065
chrIV	1569008	1569520	gesPSI:0.16454709	950	-	1569008	1569520	0	2	50,50	0,462
chrIV	1568405	1569087	gesPSI:0.20829075	950	-	1568405	1569087	0	2	50,50	0,632
chrIII	1841860	1842919	gesPSI:0.67841395	950	+	1841860	1842919	0	2	50,50	0,1009
chrIII	1841860	1844422	gesPSI:0.32158605	950	+	1841860	1844422	0	2	50,50	0,2512
chrIII	1843053	1844422	gesPSI:0.84233154	950	+	1843053	1844422	0	2	50,50	0,1319
chrV	2023964	2024241	gesPSI:0.08260582	950	+	2023964	2024241	0	2	50,50	0,227
chrV	2023964	2024528	gesPSI:0.91739418	950	+	2023964	2024528	0	2	50,50	0,514
chrV	2024264	2024528	gesPSI:0.18362971	950	+	2024264	2024528	0	2	50,50	0,214
chrX	2285476	2285892	gesPSI:0.49667774	950	-	2285476	2285892	0	2	50,50	0,366
chrX	2285601	2285892	gesPSI:0.50332226	950	-	2285601	2285892	0	2	50,50	0,241
chrX	2285476	2285619	gesPSI:0.37165049	950	-	2285476	2285619	0	2	50,50	0,93
chrIII	2398535	2400730	gesPSI:0.83803521	950	-	2398535	2400730	0	2	50,50	0,2145
chrIII	2395918	2400730	gesPSI:0.16196479	950	-	2395918	2400730	0	2	50,50	0,4762
chrIII	2395918	2398440	gesPSI:0.87573778	950	-	2395918	2398440	0	2	50,50	0,2472
chrIII	2556628	2557672	gesPSI:0.32858215	950	+	2556628	2557672	0	2	50,50	0,994
chrIII	2556628	2556986	gesPSI:0.67141785	950	+	2556628	2556986	0	2	50,50	0,308
chrIII	2556949	2557672	gesPSI:0.68525670	950	+	2556949	2557672	0	2	50,50	0,673
chrIV	2596212	2596506	gesPSI:0.45422078	950	+	2596212	2596506	0	2	50,50	0,244
chrIV	2596212	2596364	gesPSI:0.54577922	950	+	2596212	2596364	0	2	50,50	0,102
chrIV	2596316	2596506	gesPSI:0.77904217	950	+	2596316	2596506	0	2	50,50	0,140
chrII	3017057	3017234	gesPSI:0.81548762	950	+	3017057	3017234	0	2	50,50	0,127
chrII	3017057	3017397	gesPSI:0.18451238	950	+	3017057	3017397	0	2	50,50	0,290
chrII	3017153	3017397	gesPSI:0.80477504	950	+	3017153	3017397	0	2	50,50	0,194
chrX	3345081	3345334	gesPSI:0.84350353	950	+	3345081	3345334	0	2	50,50	0,203
chrX	3345081	3345442	gesPSI:0.15649647	950	+	3345081	3345442	0	2	50,50	0,311
chrX	3345297	3345442	gesPSI:0.83004545	950	+	3345297	3345442	0	2	50,50	0,95
chrI	3506190	3508271	gesPSI:0.55224262	950	+	3506190	3508271	0	2	50,50	0,2031
chrI	3506190	3507139	gesPSI:0.44775738	950	+	3506190	3507139	0	2	50,50	0,899
chrI	3507114	3508271	gesPSI:0.41111067	950	+	3507114	3508271	0	2	50,50	0,1107
chrX	3578257	3578595	gesPSI:0.10975583	950	+	3578257	3578595	0	2	50,50	0,288
chrX	3578257	3578706	gesPSI:0.89024417	950	+	3578257	3578706	0	2	50,50	0,399
chrX	3578553	3578706	gesPSI:0.10565510	950	+	3578553	3578706	0	2	50,50	0,103
chrI	3688525	3689310	gesPSI:0.18688767	950	+	3688525	3689310	0	2	50,50	0,735
chrI	3688525	3689565	gesPSI:0.81311233	950	+	3688525	3689565	0	2	50,50	0,990
chrI	3689307	3689565	gesPSI:0.28670849	950	+	3689307	3689565	0	2	50,50	0,208
chrII	4014382	4014991	gesPSI:0.68958333	950	+	4014382	4014991	0	2	50,50	0,559
chrII	4014382	4015299	gesPSI:0.31041667	950	+	4014382	4015299	0	2	50,50	0,867
chrII	4015033	4015299	gesPSI:0.77005217	950	+	4015033	4015299	0	2	50,50	0,216
chrX	4058211	4059173	gesPSI:0.54711752	950	-	4058211	4059173	0	2	50,50	0,912
chrX	4058783	4059173	gesPSI:0.45288248	950	-	4058783	4059173	0	2	50,50	0,340
chrX	4058211	4058861	gesPSI:0.36699507	950	-	4058211	4058861	0	2	50,50	0,600
chrIV	4178506	4178785	gesPSI:0.61883918	950	+	4178506	4178785	0	2	50,50	0,229
chrIV	4178506	4179312	gesPSI:0.38116082	950	+	4178506	4179312	0	2	50,50	0,756
chrIV	4178959	4179312	gesPSI:0.68899646	950	+	4178959	4179312	0	2	50,50	0,303
chrIV	4302416	4302823	gesPSI:0.84740413	950	+	4302416	4302823	0	2	50,50	0,357
chrIV	4302416	4302621	gesPSI:0.15259587	950	+	4302416	4302621	0	2	50,50	0,155
chrIV	4302569	4302823	gesPSI:0.15539708	950	+	4302569	4302823	0	2	50,50	0,204
chrII	4492070	4492254	gesPSI:0.08405429	950	-	4492070	4492254	0	2	50,50	0,134
chrII	4491729	4492254	gesPSI:0.91594571	950	-	4491729	4492254	0	2	50,50	0,475
chrII	4491729	4492136	gesPSI:0.06537327	950	-	4491729	4492136	0	2	50,50	0,357
chrV	5550830	5551822	gesPSI:0.21145537	950	-	5550830	5551822	0	2	50,50	0,942
chrV	5551632	5551822	gesPSI:0.78854463	950	-	5551632	5551822	0	2	50,50	0,140
chrV	5550830	5551660	gesPSI:0.79966510	950	-	5550830	5551660	0	2	50,50	0,780
chrIII	5879983	5881102	gesPSI:0.26663939	950	+	5879983	5881102	0	2	50,50	0,1069
chrIII	5880428	5880597	gesPSI:0.73336061	950	+	5880428	5880597	0	2	50,50	0,119
chrIII	5880879	5881102	gesPSI:0.81838958	950	+	5880879	5881102	0	2	50,50	0,173
chrIII	5904402	5905446	gesPSI:0.34470770	950	-	5904402	5905446	0	2	50,50	0,994
chrIII	5905297	5905446	gesPSI:0.65529230	950	-	5905297	5905446	0	2	50,50	0,99
chrIII	5904402	5905294	gesPSI:0.62646199	950	-	5904402	5905294	0	2	50,50	0,842
chrIII	6004591	6004854	gesPSI:0.74502992	950	+	6004591	6004854	0	2	50,50	0,213
chrIII	6004591	6005300	gesPSI:0.25497008	950	+	6004591	6005300	0	2	50,50	0,659
chrIII	6004898	6005300	gesPSI:0.73229244	950	+	6004898	6005300	0	2	50,50	0,352
chrV	6121586	6121861	gesPSI:0.66169047	950	-	6121586	6121861	0	2	50,50	0,225
chrV	6121700	6121861	gesPSI:0.33830953	950	-	6121700	6121861	0	2	50,50	0,111
chrV	6121586	6121732	gesPSI:0.30974276	950	-	6121586	6121732	0	2	50,50	0,96
chrIII	6128334	6129391	gesPSI:0.07074268	950	-	6128334	6129391	0	2	50,50	0,1007
chrIII	6127871	6129391	gesPSI:0.92925732	950	-	6127871	6129391	0	2	50,50	0,1470
chrIII	6127871	6128371	gesPSI:0.10767263	950	-	6127871	6128371	0	2	50,50	0,450
chrIV	6157659	6158370	gesPSI:0.37103175	950	-	6157659	6158370	0	2	50,50	0,661
chrIV	6157864	6158370	gesPSI:0.62896825	950	-	6157864	6158370	0	2	50,50	0,456
chrIV	6157659	6157877	gesPSI:0.54047619	950	-	6157659	6157877	0	2	50,50	0,168
chrIII	6166245	6166568	gesPSI:0.54940753	950	-	6166245	6166568	0	2	50,50	0,273
chrIII	6166414	6166568	gesPSI:0.45059247	950	-	6166414	6166568	0	2	50,50	0,104
chrIII	6166245	6166490	gesPSI:0.45513763	950	-	6166245	6166490	0	2	50,50	0,195
chrIII	6170742	6170949	gesPSI:0.94283778	950	+	6170742	6170949	0	2	50,50	0,157
chrIII	6170742	6171132	gesPSI:0.05716222	950	+	6170742	6171132	0	2	50,50	0,340
chrIII	6170977	6171132	gesPSI:0.92968099	950	+	6170977	6171132	0	2	50,50	0,105
chrV	6216368	6216529	gesPSI:0.35577618	950	+	6216368	6216529	0	2	50,50	0,111
chrV	6216368	6216838	gesPSI:0.64422382	950	+	6216368	6216838	0	2	50,50	0,420
chrV	6216444	6216838	gesPSI:0.40073139	950	+	6216444	6216838	0	2	50,50	0,344
chrX	6233547	6234119	gesPSI:0.90393153	950	-	6233547	6234119	0	2	50,50	0,522
chrX	6233885	6234119	gesPSI:0.09606847	950	-	6233885	6234119	0	2	50,50	0,184
chrX	6233547	6233910	gesPSI:0.08431998	950	-	6233547	6233910	0	2	50,50	0,313
chrIII	6340410	6340882	gesPSI:0.92788504	950	-	6340410	6340882	0	2	50,50	0,422
chrIII	6340737	6340882	gesPSI:0.07211496	950	-	6340737	6340882	0	2	50,50	0,95
chrIII	6340410	6340741	gesPSI:0.07312538	950	-	6340410	6340741	0	2	50,50	0,281
chrII	6404368	6404634	gesPSI:0.13362958	950	+	6404368	6404634	0	2	50,50	0,216
chrII	6404368	6404516	gesPSI:0.86637042	950	+	6404368	6404516	0	2	50,50	0,98
chrII	6404490	6404634	gesPSI:0.85669620	950	+	6404490	6404634	0	2	50,50	0,94
chrV	6705242	6706247	gesPSI:0.48319701	950	-	6705242	6706247	0	2	50,50	0,955
chrV	6706105	6706247	gesPSI:0.51680299	950	-	6706105	6706247	0	2	50,50	0,92
chrV	6705242	6706097	gesPSI:0.60899474	950	-	6705242	6706097	0	2	50,50	0,805
chrI	6927708	6928045	gesPSI:0.78649666	950	+	6927708	6928045	0	2	50,50	0,287
chrI	6927708	6928532	gesPSI:0.21350334	950	+	6927708	6928532	0	2	50,50	0,774
chrI	6928081	6928532	gesPSI:0.83341853	950	+	6928081	6928532	0	2	50,50	0,401
chrII	6953979	6954212	gesPSI:0.44151068	950	+	6953979	6954212	0	2	50,50	0,183
chrII	6953979	6954428	gesPSI:0.55848932	950	+	6953979	6954428	0	2	50,50	0,399
chrII	6954199	6954428	gesPSI:0.50557751	950	+	6954199	6954428	0	2	50,50	0,179
chrII	6990674	6991182	gesPSI:0.72113121	950	+	6990674	6991182	0	2	50,50	0,458
chrII	6990674	6990925	gesPSI:0.27886879	950	+	6990674	6990925	0	2	50,50	0,201
chrII	6990873	6991182	gesPSI:0.20800881	950	+	6990873	6991182	0	2	50,50	0,259
chrV	7010230	7010427	gesPSI:0.28537482	950	+	7010230	7010427	0	2	50,50	0,147
chrV	7010230	7010555	gesPSI:0.71462518	950	+	7010230	7010555	0	2	50,50	0,275
chrV	7010351	7010555	gesPSI:0.31177156	950	+	7010351	7010555	0	2	50,50	0,154
chrIV	7086049	7086232	gesPSI:0.87124763	950	-	7086049	7086232	0	2	50,50	0,133
chrIV	7085807	7086232	gesPSI:0.12875237	950	-	7085807	7086232	0	2	50,50	0,375
chrIV	7085807	7086116	gesPSI:0.86423343	950	-	7085807	7086116	0	2	50,50	0,259
chrI	7228016	7228878	gesPSI:0.38819876	950	+	7228016	7228878	0	2	50,50	0,812
chrI	7228016	7228400	gesPSI:0.61180124	950	+	7228016	7228400	0	2	50,50	0,334
chrI	7228498	7228878	gesPSI:0.67990449	950	+	7228498	7228878	0	2	50,50	0,330
chrX	7239792	7240136	gesPSI:0.07446226	950	-	7239792	7240136	0	2	50,50	0,294
chrX	7239535	7240136	gesPSI:0.92553774	950	-	7239535	7240136	0	2	50,50	0,551
chrX	7239535	7239874	gesPSI:0.06304385	950	-	7239535	7239874	0	2	50,50	0,289
chrIII	7349889	7351357	gesPSI:0.11128651	950	-	7349889	7351357	0	2	50,50	0,1418
chrIII	7350674	7351357	gesPSI:0.88871349	950	-	7350674	7351357	0	2	50,50	0,633
chrIII	7349889	7350571	gesPSI:0.94403638	950	-	7349889	7350571	0	2	50,50	0,632
chrII	7707143	7707308	gesPSI:0.06909048	950	-	7707143	7707308	0	2	50,50	0,115
chrII	7706823	7707308	gesPSI:0.93090952	950	-	7706823	7707308	0	2	50,50	0,435
chrII	7706823	7707047	gesPSI:0.05670652	950	-	7706823	7707047	0	2	50,50	0,174
chrIV	7715097	7715518	gesPSI:0.73474124	950	-	7715097	7715518	0	2	50,50	0,371
chrIV	7715333	7715518	gesPSI:0.26525876	950	-	7715333	7715518	0	2	50,50	0,135
chrIV	7715097	7715361	gesPSI:0.41274155	950	-	7715097	7715361	0	2	50,50	0,214
chrII	7786382	7786648	gesPSI:0.68452381	950	-	7786382	7786648	0	2	50,50	0,216
chrII	7785456	7786648	gesPSI:0.31547619	950	-	7785456	7786648	0	2	50,50	0,1142
chrII	7785456	7786440	gesPSI:0.66068796	950	-	7785456	7786440	0	2	50,50	0,934
chrIV	7905878	7906084	gesPSI:0.87031706	950	+	7905878	7906084	0	2	50,50	0,156
chrIV	7905878	7906832	gesPSI:0.12968294	950	+	7905878	7906832	0	2	50,50	0,904
chrIV	7906146	7906832	gesPSI:0.88930112	950	+	7906146	7906832	0	2	50,50	0,636
chrX	7940574	7940933	gesPSI:0.50409547	950	-	7940574	7940933	0	2	50,50	0,309
chrX	7940774	7940933	gesPSI:0.49590453	950	-	7940774	7940933	0	2	50,50	0,109
chrX	7940574	7940846	gesPSI:0.49497641	950	-	7940574	7940846	0	2	50,50	0,222
chrIII	7985125	7985392	gesPSI:0.83001287	950	+	7985125	7985392	0	2	50,50	0,217
chrIII	7985125	7985714	gesPSI:0.16998713	950	+	7985125	7985714	0	2	50,50	0,539
chrIII	7985301	7985714	gesPSI:0.83056532	950	+	7985301	7985714	0	2	50,50	0,363
chrIII	8332390	8332635	gesPSI:0.12101576	950	+	8332390	8332635	0	2	50,50	0,195
chrIII	8332390	8332822	gesPSI:0.87898424	950	+	8332390	8332822	0	2	50,50	0,382
chrIII	8332594	8332822	gesPSI:0.06501904	950	+	8332594	8332822	0	2	50,50	0,178
chrII	8406159	8406302	gesPSI:0.58903134	950	+	8406159	8406302	0	2	50,50	0,93
chrII	8406159	8406441	gesPSI:0.41096866	950	+	8406159	8406441	0	2	50,50	0,232
chrII	8406298	8406441	gesPSI:0.62676835	950	+	8406298	8406441	0	2	50,50	0,93
chrII	8625874	8626943	gesPSI:0.83231804	950	+	8625874	8626943	0	2	50,50	0,1019
chrII	8625874	8627126	gesPSI:0.16768196	950	+	8625874	8627126	0	2	50,50	0,1202
chrII	8626942	8627126	gesPSI:0.81100215	950	+	8626942	8627126	0	2	50,50	0,134
chrIII	8632740	8633295	gesPSI:0.62344862	950	+	8632740	8633295	0	2	50,50	0,505
chrIII	8632740	8633111	gesPSI:0.37655138	950	+	8632740	8633111	0	2	50,50	0,321
chrIII	8633126	8633295	gesPSI:0.33641920	950	+	8633126	8633295	0	2	50,50	0,119
chrIV	8675581	8675790	gesPSI:0.69759498	950	+	8675581	8675790	0	2	50,50	0,159
chrIV	8675581	8676219	gesPSI:0.30240502	950	+	8675581	8676219	0	2	50,50	0,588
chrIV	8675728	8676219	gesPSI:0.69405139	950	+	8675728	8676219	0	2	50,50	0,441
chrI	8708082	8708278	gesPSI:0.35848916	950	-	8708082	8708278	0	2	50,50	0,146
chrI	8707509	8708278	gesPSI:0.64151084	950	-	8707509	8708278	0	2	50,50	0,719
chrI	8707509	8708134	gesPSI:0.35363280	950	-	8707509	8708134	0	2	50,50	0,575
chrIII	8724694	8724850	gesPSI:0.47391892	950	+	8724694	8724850	0	2	50,50	0,106
chrIII	8724694	8725037	gesPSI:0.52608108	950	+	8724694	8725037	0	2	50,50	0,293
chrIII	8724797	8725037	gesPSI:0.44389566	950	+	8724797	8725037	0	2	50,50	0,190
chrIV	8747886	8748261	gesPSI:0.36936937	950	+	8747886	8748261	0	2	50,50	0,325
chrIV	8747886	8748680	gesPSI:0.63063063	950	+	8747886	8748680	0	2	50,50	0,744
chrIV	8748221	8748680	gesPSI:0.61268556	950	+	8748221	8748680	0	2	50,50	0,409
chrX	8847343	8847681	gesPSI:0.87269231	950	+	8847343	8847681	0	2	50,50	0,288
chrX	8847343	8847825	gesPSI:0.12730769	950	+	8847343	8847825	0	2	50,50	0,432
chrX	8847677	8847825	gesPSI:0.90291734	950	+	8847677	8847825	0	2	50,50	0,98
chrIV	8929203	8929865	gesPSI:0.55808469	950	+	8929203	8929865	0	2	50,50	0,612
chrIV	8929203	8930265	gesPSI:0.44191531	950	+	8929203	8930265	0	2	50,50	0,1012
chrIV	8929998	8930265	gesPSI:0.39818377	950	+	8929998	8930265	0	2	50,50	0,217
chrII	8998257	8998470	gesPSI:0.86801947	950	+	8998257	8998470	0	2	50,50	0,163
chrII	8998257	8998798	gesPSI:0.13198053	950	+	8998257	8998798	0	2	50,50	0,491
chrII	8998609	8998798	gesPSI:0.90973004	950	+	8998609	8998798	0	2	50,50	0,139
chrIV	9095248	9095392	gesPSI:0.36722731	950	-	9095248	9095392	0	2	50,50	0,94
chrIV	9095129	9095392	gesPSI:0.63277269	950	-	9095129	9095392	0	2	50,50	0,213
chrIV	9095129	9095288	gesPSI:0.40215338	950	-	9095129	9095288	0	2	50,50	0,109
chrIV	9208466	9209143	gesPSI:0.58522727	950	+	9208466	9209143	0	2	50,50	0,627
chrIV	9208466	9210413	gesPSI:0.41477273	950	+	9208466	9210413	0	2	50,50	0,1897
chrIV	9209526	9210413	gesPSI:0.80623639	950	+	9209526	9210413	0	2	50,50	0,837
chrX	9253574	9254195	gesPSI:0.65489150	950	+	9253574	9254195	0	2	50,50	0,571
chrX	9253574	9253758	gesPSI:0.34510850	950	+	9253574	9253758	0	2	50,50	0,134
chrX	9253793	9254195	gesPSI:0.19436505	950	+	9253793	9254195	0	2	50,50	0,352
chrII	9259334	9259720	gesPSI:0.65095259	950	-	9259334	9259720	0	2	50,50	0,336
chrII	9259567	9259720	gesPSI:0.34904741	950	-	9259567	9259720	0	2	50,50	0,103
chrII	9259334	9259639	gesPSI:0.40270887	950	-	9259334	9259639	0	2	50,50	0,255
chrI	9328024	9328824	gesPSI:0.80294150	950	+	9328024	9328824	0	2	50,50	0,750
chrI	9328024	9329429	gesPSI:0.19705850	950	+	9328024	9329429	0	2	50,50	0,1355
chrI	9329259	9329429	gesPSI:0.93610548	950	+	9329259	9329429	0	2	50,50	0,120
chrV	9343366	9343725	gesPSI:0.17391865	950	-	9343366	9343725	0	2	50,50	0,309
chrV	9343517	9343725	gesPSI:0.82608135	950	-	9343517	9343725	0	2	50,50	0,158
chrV	9343366	9343550	gesPSI:0.79671582	950	-	9343366	9343550	0	2	50,50	0,134
chrI	9442229	9443086	gesPSI:0.64058924	950	-	9442229	9443086	0	2	50,50	0,807
chrI	9441468	9443086	gesPSI:0.35941076	950	-	9441468	9443086	0	2	50,50	0,1568
chrI	9441468	9441990	gesPSI:0.86542555	950	-	9441468	9441990	0	2	50,50	0,472
chrV	9459425	9460101	gesPSI:0.45268038	950	+	9459425	9460101	0	2	50,50	0,626
chrV	9459425	9459643	gesPSI:0.54731962	950	+	9459425	9459643	0	2	50,50	0,168
chrV	9459620	9460101	gesPSI:0.56622536	950	+	9459620	9460101	0	2	50,50	0,431
chrV	9706968	9707137	gesPSI:0.28638972	950	+	9706968	9707137	0	2	50,50	0,119
chrV	9706968	9707582	gesPSI:0.71361028	950	+	9706968	9707582	0	2	50,50	0,564
chrV	9707106	9707582	gesPSI:0.26049809	950	+	9707106	9707582	0	2	50,50	0,426
chrIII	9826645	9826961	gesPSI:0.74815080	950	-	9826645	9826961	0	2	50,50	0,266
chrIII	9826797	9826961	gesPSI:0.25184920	950	-	9826797	9826961	0	2	50,50	0,114
chrIII	9826645	9826865	gesPSI:0.24311470	950	-	9826645	9826865	0	2	50,50	0,170
chrIII	9864509	9864883	gesPSI:0.49610687	950	-	9864509	9864883	0	2	50,50	0,324
chrIII	9863764	9864883	gesPSI:0.50389313	950	-	9863764	9864883	0	2	50,50	0,1069
chrIII	9863764	9864355	gesPSI:0.65462901	950	-	9863764	9864355	0	2	50,50	0,541
chrI	10071685	10071833	gesPSI:0.86983714	950	-	10071685	10071833	0	2	50,50	0,98
chrI	10071570	10071833	gesPSI:0.13016286	950	-	10071570	10071833	0	2	50,50	0,213
chrI	10071570	10071716	gesPSI:0.90444126	950	-	10071570	10071716	0	2	50,50	0,96
chrX	10311517	10312065	gesPSI:0.83393530	950	+	10311517	10312065	0	2	50,50	0,498
chrX	10311517	10311702	gesPSI:0.16606470	950	+	10311517	10311702	0	2	50,50	0,135
chrX	10311693	10312065	gesPSI:0.17028536	950	+	10311693	10312065	0	2	50,50	0,322
chrIV	10334119	10337681	gesPSI:0.75800287	950	-	10334119	10337681	0	2	50,50	0,3512
chrIV	10336214	10337681	gesPSI:0.24199713	950	-	10336214	10337681	0	2	50,50	0,1417
chrIV	10334119	10336161	gesPSI:0.22469884	950	-	10334119	10336161	0	2	50,50	0,1992
chrI	10412896	10413542	gesPSI:0.38281250	950	+	10412896	10413542	0	2	50,50	0,596
chrI	10412896	10413411	gesPSI:0.61718750	950	+	10412896	10413411	0	2	50,50	0,465
chrI	10413359	10413542	gesPSI:0.73822976	950	+	10413359	10413542	0	2	50,50	0,133
chrI	10475118	10475400	gesPSI:0.15199023	950	+	10475118	10475400	0	2	50,50	0,232
chrI	10475118	10475267	gesPSI:0.84800977	950	+	10475118	10475267	0	2	50,50	0,99
chrI	10475251	10475400	gesPSI:0.86769861	950	+	10475251	10475400	0	2	50,50	0,99
chrV	10475507	10476328	gesPSI:0.12443511	950	+	10475507	10476328	0	2	50,50	0,771
chrV	10475507	10475691	gesPSI:0.87556489	950	+	10475507	10475691	0	2	50,50	0,134
chrV	10475654	10476328	gesPSI:0.89237707	950	+	10475654	10476328	0	2	50,50	0,624
chrX	10528073	10529036	gesPSI:0.76499322	950	-	10528073	10529036	0	2	50,50	0,913
chrX	10528376	10529036	gesPSI:0.23500678	950	-	10528376	10529036	0	2	50,50	0,610
chrX	10528073	10528386	gesPSI:0.46708834	950	-	10528073	10528386	0	2	50,50	0,263
chrX	11319562	11319846	gesPSI:0.74005255	950	+	11319562	11319846	0	2	50,50	0,234
chrX	11319562	11320063	gesPSI:0.25994745	950	+	11319562	11320063	0	2	50,50	0,451
chrX	11319831	11320063	gesPSI:0.83790978	950	+	11319831	11320063	0	2	50,50	0,182
chrV	11345753	11346467	gesPSI:0.12459082	950	-	11345753	11346467	0	2	50,50	0,664
chrV	11346175	11346467	gesPSI:0.87540918	950	-	11346175	11346467	0	2	50,50	0,242
chrV	11345753	11346218	gesPSI:0.87879624	950	-	11345753	11346218	0	2	50,50	0,415
chrX	11373105	11373323	gesPSI:0.94427419	950	+	11373105	11373323	0	2	50,50	0,168
chrX	11373105	11374006	gesPSI:0.05572581	950	+	11373105	11374006	0	2	50,50	0,851
chrX	11373325	11374006	gesPSI:0.93979992	950	+	11373325	11374006	0	2	50,50	0,631
chrII	11385881	11386118	gesPSI:0.59059874	950	-	11385881	11386118	0	2	50,50	0,187
chrII	11385104	11386118	gesPSI:0.40940126	950	-	11385104	11386118	0	2	50,50	0,964
chrII	11385104	11385827	gesPSI:0.70095619	950	-	11385104	11385827	0	2	50,50	0,673
chrX	11395170	11395316	gesPSI:0.27444982	950	-	11395170	11395316	0	2	50,50	0,96
chrX	11394946	11395316	gesPSI:0.72555018	950	-	11394946	11395316	0	2	50,50	0,320
chrX	11394946	11395234	gesPSI:0.31884633	950	-	11394946	11395234	0	2	50,50	0,238
chrII	11594582	11594756	gesPSI:0.48675567	950	-	11594582	11594756	0	2	50,50	0,124
chrII	11594414	11594756	gesPSI:0.51324433	950	-	11594414	11594756	0	2	50,50	0,292
chrII	11594414	11594643	gesPSI:0.55622558	950	-	11594414	11594643	0	2	50,50	0,179
chrI	11689063	11689394	gesPSI:0.45693277	950	-	11689063	11689394	0	2	50,50	0,281
chrI	11688938	11689394	gesPSI:0.54306723	950	-	11688938	11689394	0	2	50,50	0,406
chrI	11688938	11689084	gesPSI:0.42222222	950	-	11688938	11689084	0	2	50,50	0,96
chrII	11979054	11979332	gesPSI:0.65356890	950	-	11979054	11979332	0	2	50,50	0,228
chrII	11978872	11979332	gesPSI:0.34643110	950	-	11978872	11979332	0	2	50,50	0,410
chrII	11978872	11979097	gesPSI:0.66949578	950	-	11978872	11979097	0	2	50,50	0,175
chrV	11992098	11992967	gesPSI:0.51390723	950	-	11992098	11992967	0	2	50,50	0,819
chrV	11992608	11992967	gesPSI:0.48609277	950	-	11992608	11992967	0	2	50,50	0,309
chrV	11992098	11992657	gesPSI:0.47792423	950	-	11992098	11992657	0	2	50,50	0,509
chrIV	12413751	12413903	gesPSI:0.40175561	950	-	12413751	12413903	0	2	50,50	0,102
chrIV	12413189	12413903	gesPSI:0.59824439	950	-	12413189	12413903	0	2	50,50	0,664
chrIV	12413189	12413794	gesPSI:0.50913593	950	-	12413189	12413794	0	2	50,50	0,555
chrIII	12447308	12448154	gesPSI:0.70718808	950	-	12447308	12448154	0	2	50,50	0,796
chrIII	12447975	12448154	gesPSI:0.29281192	950	-	12447975	12448154	0	2	50,50	0,129
chrIII	12447308	12447937	gesPSI:0.43091799	950	-	12447308	12447937	0	2	50,50	0,579
chrIII	12481626	12482839	gesPSI:0.93008109	950	+	12481626	12482839	0	2	50,50	0,1163
chrIII	12481626	12481777	gesPSI:0.06991891	950	+	12481626	12481777	0	2	50,50	0,101
chrIII	12481704	12482839	gesPSI:0.07587433	950	+	12481704	12482839	0	2	50,50	0,1085
chrV	12591432	12591578	gesPSI:0.85092293	950	-	12591432	12591578	0	2	50,50	0,96
chrV	12591297	12591578	gesPSI:0.14907707	950	-	12591297	12591578	0	2	50,50	0,231
chrV	12591297	12591463	gesPSI:0.84217752	950	-	12591297	12591463	0	2	50,50	0,116
chrV	12699218	12699456	gesPSI:0.28413562	950	+	12699218	12699456	0	2	50,50	0,188
chrV	12699218	12699898	gesPSI:0.71586438	950	+	12699218	12699898	0	2	50,50	0,630
chrV	12699395	12699898	gesPSI:0.25106246	950	+	12699395	12699898	0	2	50,50	0,453
chrII	12785075	12785368	gesPSI:0.41902412	950	-	12785075	12785368	0	2	50,50	0,243
chrII	12784388	12785368	gesPSI:0.58097588	950	-	12784388	12785368	0	2	50,50	0,930
chrII	12784388	12785121	gesPSI:0.34034792	950	-	12784388	12785121	0	2	50,50	0,683
chrIV	12908386	12908683	gesPSI:0.44485580	950	-	12908386	12908683	0	2	50,50	0,247
chrIV	12908535	12908683	gesPSI:0.55514420	950	-	12908535	12908683	0	2	50,50	0,98
chrIV	12908386	12908528	gesPSI:0.57949027	950	-	12908386	12908528	0	2	50,50	0,92
chrIV	13033880	13034873	gesPSI:0.72188792	950	+	13033880	13034873	0	2	50,50	0,943
chrIV	13033880	13034502	gesPSI:0.27811208	950	+	13033880	13034502	0	2	50,50	0,572
chrIV	13034478	13034873	gesPSI:0.30610885	950	+	13034478	13034873	0	2	50,50	0,345
chrX	13247754	13248224	gesPSI:0.24185185	950	-	13247754	13248224	0	2	50,50	0,420
chrX	13247882	13248224	gesPSI:0.75814815	950	-	13247882	13248224	0	2	50,50	0,292
chrX	13247754	13247918	gesPSI:0.66777778	950	-	13247754	13247918	0	2	50,50	0,114
chrV	13370586	13370997	gesPSI:0.47065383	950	-	13370586	13370997	0	2	50,50	0,361
chrV	13370802	13370997	gesPSI:0.52934617	950	-	13370802	13370997	0	2	50,50	0,145
chrV	13370586	13370821	gesPSI:0.59584682	950	-	13370586	13370821	0	2	50,50	0,185
chrIII	13515467	13516754	gesPSI:0.79135162	950	-	13515467	13516754	0	2	50,50	0,1237
chrIII	13516023	13516577	gesPSI:0.20864838	950	-	13516023	13516577	0	2	50,50	0,504
chrIII	13515467	13516075	gesPSI:0.20683569	950	-	13515467	13516075	0	2	50,50	0,558
chrII	13635712	13636268	gesPSI:0.66589766	950	+	13635712	13636268	0	2	50,50	0,506
chrII	13635712	13636800	gesPSI:0.33410234	950	+	13635712	13636800	0	2	50,50	0,1038
chrII	13636222	13636800	gesPSI:0.62821276	950	+	13636222	13636800	0	2	50,50	0,528
chrIII	13772263	13772409	gesPSI:0.85893928	950	+	13772263	13772409	0	2	50,50	0,96
chrIII	13772263	13772779	gesPSI:0.14106072	950	+	13772263	13772779	0	2	50,50	0,466
chrIII	13772400	13772779	gesPSI:0.90392546	950	+	13772400	13772779	0	2	50,50	0,329
chrI	13805018	13805907	gesPSI:0.87620461	950	-	13805018	13805907	0	2	50,50	0,839
chrI	13803746	13805907	gesPSI:0.12379539	950	-	13803746	13805907	0	2	50,50	0,2111
chrI	13803746	13804960	gesPSI:0.91765979	950	-	13803746	13804960	0	2	50,50	0,1164
chrI	14398807	14399672	gesPSI:0.94117280	950	+	14398807	14399672	0	2	50,50	0,815
chrI	14398807	14399467	gesPSI:0.05882720	950	+	14398807	14399467	0	2	50,50	0,610
chrI	14399486	14399672	gesPSI:0.11374023	950	+	14399486	14399672	0	2	50,50	0,136
chrI	14541757	14542313	gesPSI:0.77902422	950	+	14541757	14542313	0	2	50,50	0,506
chrI	14541757	14543389	gesPSI:0.22097578	950	+	14541757	14543389	0	2	50,50	0,1582
chrI	14542330	14543389	gesPSI:0.83225108	950	+	14542330	14543389	0	2	50,50	0,1009
chrI	14567447	14570102	gesPSI:0.74161550	950	-	14567447	14570102	0	2	50,50	0,2605
chrI	14569890	14570102	gesPSI:0.25838450	950	-	14569890	14570102	0	2	50,50	0,162
chrI	14567447	14569966	gesPSI:0.25922899	950	-	14567447	14569966	0	2	50,50	0,2469
chrV	14705442	14706163	gesPSI:0.27143778	950	+	14705442	14706163	0	2	50,50	0,671
chrV	14705442	14705867	gesPSI:0.72856222	950	+	14705442	14705867	0	2	50,50	0,375
chrV	14705881	14706163	gesPSI:0.74705882	950	+	14705881	14706163	0	2	50,50	0,232
chrI	14950361	14951491	gesPSI:0.57780888	950	+	14950361	14951491	0	2	50,50	0,1080
chrI	14950361	14950945	gesPSI:0.42219112	950	+	14950361	14950945	0	2	50,50	0,534
chrI	14951107	14951491	gesPSI:0.39727809	950	+	14951107	14951491	0	2	50,50	0,334
chrX	14981290	14981577	gesPSI:0.32828761	950	-	14981290	14981577	0	2	50,50	0,237
chrX	14981430	14981577	gesPSI:0.67171239	950	-	14981430	14981577	0	2	50,50	0,97
chrX	14981290	14981435	gesPSI:0.74530387	950	-	14981290	14981435	0	2	50,50	0,95
chrX	15409797	15410108	gesPSI:0.28072414	950	-	15409797	15410108	0	2	50,50	0,261
chrX	15409584	15410108	gesPSI:0.71927586	950	-	15409584	15410108	0	2	50,50	0,474
chrX	15409584	15409855	gesPSI:0.28072414	950	-	15409584	15409855	0	2	50,50	0,221
chrX	15572290	15572563	gesPSI:0.14767742	950	+	15572290	15572563	0	2	50,50	0,223
chrX	15572290	15572926	gesPSI:0.85232258	950	+	15572290	15572926	0	2	50,50	0,586
chrX	15572545	15572926	gesPSI:0.13528265	950	+	15572545	15572926	0	2	50,50	0,331
chrX	17059174	17059367	gesPSI:0.29852522	950	-	17059174	17059367	0	2	50,50	0,143
chrX	17058196	17059367	gesPSI:0.70147478	950	-	17058196	17059367	0	2	50,50	0,1121
chrX	17058196	17059247	gesPSI:0.30931777	950	-	17058196	17059247	0	2	50,50	0,1001
chrV	17775246	17775424	gesPSI:0.75463515	950	-	17775246	17775424	0	2	50,50	0,128
chrV	17774718	17775424	gesPSI:0.24536485	950	-	17774718	17775424	0	2	50,50	0,656
chrV	17774718	17775176	gesPSI:0.80700804	950	-	17774718	17775176	0	2	50,50	0,408
chrV	18844024	18845230	gesPSI:0.54872711	950	+	18844024	18845230	0	2	50,50	0,1156
chrV	18844024	18844304	gesPSI:0.45127289	950	+	18844024	18844304	0	2	50,50	0,230
chrV	18844312	18845230	gesPSI:0.50790376	950	+	18844312	18845230	0	2	50,50	0,868
chrV	20603957	20604101	gesPSI:0.54135618	950	+	20603957	20604101	0	2	50,50	0,94
chrV	20603957	20604317	gesPSI:0.45864382	950	+	20603957	20604317	0	2	50,50	0,310
chrV	20604041	20604317	gesPSI:0.41094620	950	+	20604041	20604317	0	2	50,50	0,226
Alt3'/5' SS
track name=ges_AltSS description='ges_AltSS'
chrV	7343	7482	gesPSI:0.24309482	950	-	7343	7482	0	2	50,50	0,89
chrV	7334	7482	gesPSI:0.75690518	950	-	7334	7482	0	2	50,50	0,98
chrX	59987	60227	gesPSI:0.56650225	950	+	59987	60227	0	2	50,50	0,190
chrX	60072	60227	gesPSI:0.43349775	950	+	60072	60227	0	2	50,50	0,105
chrII	70230	70558	gesPSI:0.12649184	950	+	70230	70558	0	2	50,50	0,278
chrII	70230	70555	gesPSI:0.87350816	950	+	70230	70555	0	2	50,50	0,275
chrII	85167	85413	gesPSI:0.60386473	950	+	85167	85413	0	2	50,50	0,196
chrII	85167	85440	gesPSI:0.39613527	950	+	85167	85440	0	2	50,50	0,223
chrV	116739	117413	gesPSI:0.36846104	950	+	116739	117413	0	2	50,50	0,624
chrV	116739	117407	gesPSI:0.63153896	950	+	116739	117407	0	2	50,50	0,618
chrIII	125068	125618	gesPSI:0.11402062	950	+	125068	125618	0	2	50,50	0,500
chrIII	125011	125671	gesPSI:0.88597938	950	+	125011	125671	0	2	50,50	0,610
chrV	172881	173019	gesPSI:0.17848951	950	+	172881	173019	0	2	50,50	0,88
chrV	172881	173028	gesPSI:0.82151049	950	+	172881	173028	0	2	50,50	0,97
chrI	182576	182721	gesPSI:0.08470105	950	-	182576	182721	0	2	50,50	0,95
chrI	182566	182721	gesPSI:0.91529895	950	-	182566	182721	0	2	50,50	0,105
chrIV	215264	216920	gesPSI:0.10007072	950	+	215264	216920	0	2	50,50	0,1606
chrIV	215255	216920	gesPSI:0.89992928	950	+	215255	216920	0	2	50,50	0,1615
chrV	255899	256046	gesPSI:0.39440559	950	-	255899	256046	0	2	50,50	0,97
chrV	255899	256049	gesPSI:0.60559441	950	-	255899	256049	0	2	50,50	0,100
chrIII	345023	345515	gesPSI:0.52629825	950	-	345023	345515	0	2	50,50	0,442
chrIII	345032	345515	gesPSI:0.47370175	950	-	345032	345515	0	2	50,50	0,433
chrII	346395	347139	gesPSI:0.85213831	950	-	346395	347139	0	2	50,50	0,694
chrII	346395	347160	gesPSI:0.14786169	950	-	346395	347160	0	2	50,50	0,715
chrIV	389453	389602	gesPSI:0.13072768	950	-	389453	389602	0	2	50,50	0,99
chrIV	389453	389610	gesPSI:0.86927232	950	-	389453	389610	0	2	50,50	0,107
chrX	427949	428589	gesPSI:0.43473813	950	-	427949	428589	0	2	50,50	0,590
chrX	427940	428589	gesPSI:0.56526187	950	-	427940	428589	0	2	50,50	0,599
chrIII	473932	474490	gesPSI:0.50068271	950	+	473932	474490	0	2	50,50	0,508
chrIII	473932	474496	gesPSI:0.49931729	950	+	473932	474496	0	2	50,50	0,514
chrIV	514135	514580	gesPSI:0.13709908	950	-	514135	514580	0	2	50,50	0,395
chrIV	514126	514580	gesPSI:0.86290092	950	-	514126	514580	0	2	50,50	0,404
chrX	549868	551077	gesPSI:0.16458333	950	-	549868	551077	0	2	50,50	0,1159
chrX	550015	551077	gesPSI:0.83541667	950	-	550015	551077	0	2	50,50	0,1012
chrI	665137	665940	gesPSI:0.84609839	950	-	665137	665940	0	2	50,50	0,753
chrI	665309	665940	gesPSI:0.15390161	950	-	665309	665940	0	2	50,50	0,581
chrI	683039	683276	gesPSI:0.16173675	950	+	683039	683276	0	2	50,50	0,187
chrI	683103	683276	gesPSI:0.83826325	950	+	683103	683276	0	2	50,50	0,123
chrIII	755551	755737	gesPSI:0.85742154	950	-	755551	755737	0	2	50,50	0,136
chrIII	755551	755731	gesPSI:0.14257846	950	-	755551	755731	0	2	50,50	0,130
chrIII	941033	941185	gesPSI:0.09104511	950	-	941033	941185	0	2	50,50	0,102
chrIII	941044	941185	gesPSI:0.90895489	950	-	941044	941185	0	2	50,50	0,91
chrI	950917	951068	gesPSI:0.24923652	950	-	950917	951068	0	2	50,50	0,101
chrI	950905	951068	gesPSI:0.75076348	950	-	950905	951068	0	2	50,50	0,113
chrIV	980729	981609	gesPSI:0.62879493	950	+	980729	981609	0	2	50,50	0,830
chrIV	980762	981609	gesPSI:0.37120507	950	+	980762	981609	0	2	50,50	0,797
chrIV	984772	985717	gesPSI:0.48547547	950	-	984772	985717	0	2	50,50	0,895
chrIV	984762	985717	gesPSI:0.51452453	950	-	984762	985717	0	2	50,50	0,905
chrII	1121755	1122717	gesPSI:0.62716763	950	-	1121755	1122717	0	2	50,50	0,912
chrII	1121752	1122717	gesPSI:0.37283237	950	-	1121752	1122717	0	2	50,50	0,915
chrX	1125653	1125812	gesPSI:0.66360294	950	+	1125653	1125812	0	2	50,50	0,109
chrX	1125663	1125812	gesPSI:0.33639706	950	+	1125663	1125812	0	2	50,50	0,99
chrII	1164287	1164481	gesPSI:0.20768557	950	+	1164287	1164481	0	2	50,50	0,144
chrII	1164287	1164490	gesPSI:0.79231443	950	+	1164287	1164490	0	2	50,50	0,153
chrIV	1178137	1178348	gesPSI:0.92718916	950	+	1178137	1178348	0	2	50,50	0,161
chrIV	1178137	1178340	gesPSI:0.07281084	950	+	1178137	1178340	0	2	50,50	0,153
chrIII	1216199	1217663	gesPSI:0.06459511	950	-	1216199	1217663	0	2	50,50	0,1414
chrIII	1216766	1217663	gesPSI:0.93540489	950	-	1216766	1217663	0	2	50,50	0,847
chrIV	1217082	1218181	gesPSI:0.06934407	950	+	1217082	1218181	0	2	50,50	0,1049
chrIV	1217082	1218190	gesPSI:0.93065593	950	+	1217082	1218190	0	2	50,50	0,1058
chrIII	1239361	1241207	gesPSI:0.36915307	950	+	1239361	1241207	0	2	50,50	0,1796
chrIII	1239361	1241174	gesPSI:0.63084693	950	+	1239361	1241174	0	2	50,50	0,1763
chrI	1336066	1336258	gesPSI:0.51740293	950	+	1336066	1336258	0	2	50,50	0,142
chrI	1336108	1336258	gesPSI:0.48259707	950	+	1336108	1336258	0	2	50,50	0,100
chrIII	1402025	1402444	gesPSI:0.25491746	950	+	1402025	1402444	0	2	50,50	0,369
chrIII	1402025	1402420	gesPSI:0.74508254	950	+	1402025	1402420	0	2	50,50	0,345
chrII	1464418	1464611	gesPSI:0.12893404	950	-	1464418	1464611	0	2	50,50	0,143
chrII	1464271	1464611	gesPSI:0.87106596	950	-	1464271	1464611	0	2	50,50	0,290
chrI	1491439	1492435	gesPSI:0.37349645	950	-	1491439	1492435	0	2	50,50	0,946
chrI	1491430	1492435	gesPSI:0.62650355	950	-	1491430	1492435	0	2	50,50	0,955
chrI	1539200	1540537	gesPSI:0.78988506	950	+	1539200	1540537	0	2	50,50	0,1287
chrI	1539231	1540537	gesPSI:0.21011494	950	+	1539231	1540537	0	2	50,50	0,1256
chrII	1656387	1656531	gesPSI:0.06252668	950	-	1656387	1656531	0	2	50,50	0,94
chrII	1656387	1656535	gesPSI:0.93747332	950	-	1656387	1656535	0	2	50,50	0,98
chrI	1710946	1712759	gesPSI:0.22809767	950	+	1710946	1712759	0	2	50,50	0,1763
chrI	1710946	1712765	gesPSI:0.77190233	950	+	1710946	1712765	0	2	50,50	0,1769
chrIV	1741382	1741529	gesPSI:0.30640961	950	-	1741382	1741529	0	2	50,50	0,97
chrIV	1741382	1741535	gesPSI:0.69359039	950	-	1741382	1741535	0	2	50,50	0,103
chrII	1777062	1777217	gesPSI:0.53724747	950	+	1777062	1777217	0	2	50,50	0,105
chrII	1777067	1777217	gesPSI:0.46275253	950	+	1777067	1777217	0	2	50,50	0,100
chrIII	1879497	1880234	gesPSI:0.35463870	950	+	1879497	1880234	0	2	50,50	0,687
chrIII	1879521	1880234	gesPSI:0.64536130	950	+	1879521	1880234	0	2	50,50	0,663
chrI	1953499	1955319	gesPSI:0.37785687	950	-	1953499	1955319	0	2	50,50	0,1770
chrI	1953574	1955319	gesPSI:0.62214313	950	-	1953574	1955319	0	2	50,50	0,1695
chrV	1991777	1992685	gesPSI:0.18461845	950	-	1991777	1992685	0	2	50,50	0,858
chrV	1991777	1992769	gesPSI:0.81538155	950	-	1991777	1992769	0	2	50,50	0,942
chrV	2023384	2023742	gesPSI:0.83268834	950	+	2023384	2023742	0	2	50,50	0,308
chrV	2023438	2023742	gesPSI:0.16731166	950	+	2023438	2023742	0	2	50,50	0,254
chrI	2061832	2061986	gesPSI:0.87617705	950	-	2061832	2061986	0	2	50,50	0,104
chrI	2061832	2061977	gesPSI:0.12382295	950	-	2061832	2061977	0	2	50,50	0,95
chrV	2062467	2063380	gesPSI:0.60674546	950	-	2062467	2063380	0	2	50,50	0,863
chrV	2062458	2063380	gesPSI:0.39325454	950	-	2062458	2063380	0	2	50,50	0,872
chrII	2307311	2307459	gesPSI:0.89496256	950	+	2307311	2307459	0	2	50,50	0,98
chrII	2307236	2307459	gesPSI:0.10503744	950	+	2307236	2307459	0	2	50,50	0,173
chrIV	2325813	2326315	gesPSI:0.92865526	950	+	2325813	2326315	0	2	50,50	0,452
chrIV	2325813	2326300	gesPSI:0.07134474	950	+	2325813	2326300	0	2	50,50	0,437
chrIV	2386632	2386778	gesPSI:0.67479280	950	+	2386632	2386778	0	2	50,50	0,96
chrIV	2386605	2386772	gesPSI:0.32520720	950	+	2386605	2386772	0	2	50,50	0,117
chrIII	2449809	2449962	gesPSI:0.35770333	950	-	2449809	2449962	0	2	50,50	0,103
chrIII	2449815	2449962	gesPSI:0.64229667	950	-	2449815	2449962	0	2	50,50	0,97
chrIII	2544595	2544884	gesPSI:0.51141265	950	+	2544595	2544884	0	2	50,50	0,239
chrIII	2544595	2544890	gesPSI:0.48858735	950	+	2544595	2544890	0	2	50,50	0,245
chrIII	2559426	2560373	gesPSI:0.35498082	950	+	2559426	2560373	0	2	50,50	0,897
chrIII	2559421	2560373	gesPSI:0.64501918	950	+	2559421	2560373	0	2	50,50	0,902
chrX	2562199	2562563	gesPSI:0.61803996	950	-	2562199	2562563	0	2	50,50	0,314
chrX	2562226	2562563	gesPSI:0.38196004	950	-	2562226	2562563	0	2	50,50	0,287
chrI	2601818	2602021	gesPSI:0.31484491	950	+	2601818	2602021	0	2	50,50	0,153
chrI	2601733	2602021	gesPSI:0.68515509	950	+	2601733	2602021	0	2	50,50	0,238
chrIV	2640629	2640793	gesPSI:0.92819819	950	-	2640629	2640793	0	2	50,50	0,114
chrIV	2640636	2640793	gesPSI:0.07180181	950	-	2640636	2640793	0	2	50,50	0,107
chrI	2669161	2669683	gesPSI:0.27326639	950	+	2669161	2669683	0	2	50,50	0,472
chrI	2669161	2669680	gesPSI:0.72673361	950	+	2669161	2669680	0	2	50,50	0,469
chrI	2670148	2670302	gesPSI:0.19063474	950	+	2670148	2670302	0	2	50,50	0,104
chrI	2670148	2670296	gesPSI:0.80936526	950	+	2670148	2670296	0	2	50,50	0,98
chrI	2761463	2762196	gesPSI:0.88780674	950	-	2761463	2762196	0	2	50,50	0,683
chrI	2761463	2762293	gesPSI:0.11219326	950	-	2761463	2762293	0	2	50,50	0,780
chrIII	2782901	2783963	gesPSI:0.52636443	950	-	2782901	2783963	0	2	50,50	0,1012
chrIII	2782901	2783984	gesPSI:0.47363557	950	-	2782901	2783984	0	2	50,50	0,1033
chrI	2813697	2814249	gesPSI:0.62192121	950	+	2813697	2814249	0	2	50,50	0,502
chrI	2813697	2814183	gesPSI:0.37807879	950	+	2813697	2814183	0	2	50,50	0,436
chrIII	2824613	2825745	gesPSI:0.39522297	950	+	2824613	2825745	0	2	50,50	0,1082
chrIII	2824620	2825745	gesPSI:0.60477703	950	+	2824620	2825745	0	2	50,50	0,1075
chrII	2848250	2848400	gesPSI:0.67701305	950	-	2848250	2848400	0	2	50,50	0,100
chrII	2848259	2848400	gesPSI:0.32298695	950	-	2848259	2848400	0	2	50,50	0,91
chrII	2923955	2924108	gesPSI:0.51326260	950	+	2923955	2924108	0	2	50,50	0,103
chrII	2923955	2924138	gesPSI:0.48673740	950	+	2923955	2924138	0	2	50,50	0,133
chrIV	3013877	3014022	gesPSI:0.92549649	950	+	3013877	3014022	0	2	50,50	0,95
chrIV	3013877	3014028	gesPSI:0.07450351	950	+	3013877	3014028	0	2	50,50	0,101
chrIV	3034929	3035080	gesPSI:0.72220053	950	-	3034929	3035080	0	2	50,50	0,101
chrIV	3034938	3035080	gesPSI:0.27779947	950	-	3034938	3035080	0	2	50,50	0,92
chrIII	3061258	3061794	gesPSI:0.74405507	950	-	3061258	3061794	0	2	50,50	0,486
chrIII	3061258	3061862	gesPSI:0.25594493	950	-	3061258	3061862	0	2	50,50	0,554
chrX	3100559	3101130	gesPSI:0.94078185	950	-	3100559	3101130	0	2	50,50	0,521
chrX	3100504	3101130	gesPSI:0.05921815	950	-	3100504	3101130	0	2	50,50	0,576
chrI	3220755	3220990	gesPSI:0.35005225	950	-	3220755	3220990	0	2	50,50	0,185
chrI	3220779	3220990	gesPSI:0.64994775	950	-	3220779	3220990	0	2	50,50	0,161
chrX	3248892	3249116	gesPSI:0.29175050	950	-	3248892	3249116	0	2	50,50	0,174
chrX	3248961	3249116	gesPSI:0.70824950	950	-	3248961	3249116	0	2	50,50	0,105
chrV	3262779	3262968	gesPSI:0.34786822	950	+	3262779	3262968	0	2	50,50	0,139
chrV	3262763	3262968	gesPSI:0.65213178	950	+	3262763	3262968	0	2	50,50	0,155
chrII	3263006	3264248	gesPSI:0.13052608	950	+	3263006	3264248	0	2	50,50	0,1192
chrII	3263024	3264248	gesPSI:0.86947392	950	+	3263024	3264248	0	2	50,50	0,1174
chrI	3264427	3264579	gesPSI:0.80666667	950	-	3264427	3264579	0	2	50,50	0,102
chrI	3264427	3264574	gesPSI:0.19333333	950	-	3264427	3264574	0	2	50,50	0,97
chrII	3306448	3306686	gesPSI:0.30867913	950	-	3306448	3306686	0	2	50,50	0,188
chrII	3306453	3306686	gesPSI:0.69132087	950	-	3306453	3306686	0	2	50,50	0,183
chrII	3319555	3319733	gesPSI:0.19654130	950	+	3319555	3319733	0	2	50,50	0,128
chrII	3319584	3319733	gesPSI:0.80345870	950	+	3319584	3319733	0	2	50,50	0,99
chrIV	3337460	3337609	gesPSI:0.31112008	950	-	3337460	3337609	0	2	50,50	0,99
chrIV	3337460	3337612	gesPSI:0.68887992	950	-	3337460	3337612	0	2	50,50	0,102
chrX	3453066	3453279	gesPSI:0.65536181	950	-	3453066	3453279	0	2	50,50	0,163
chrX	3453066	3453294	gesPSI:0.34463819	950	-	3453066	3453294	0	2	50,50	0,178
chrX	3482369	3482536	gesPSI:0.57092942	950	+	3482369	3482536	0	2	50,50	0,117
chrX	3482369	3482530	gesPSI:0.42907058	950	+	3482369	3482530	0	2	50,50	0,111
chrIII	3507154	3507310	gesPSI:0.67198068	950	-	3507154	3507310	0	2	50,50	0,106
chrIII	3507160	3507310	gesPSI:0.32801932	950	-	3507160	3507310	0	2	50,50	0,100
chrII	3507559	3508525	gesPSI:0.45200871	950	+	3507559	3508525	0	2	50,50	0,916
chrII	3507559	3508519	gesPSI:0.54799129	950	+	3507559	3508519	0	2	50,50	0,910
chrI	3526557	3526705	gesPSI:0.17353365	950	-	3526557	3526705	0	2	50,50	0,98
chrI	3526557	3526714	gesPSI:0.82646635	950	-	3526557	3526714	0	2	50,50	0,107
chrX	3639786	3639981	gesPSI:0.89544127	950	-	3639786	3639981	0	2	50,50	0,145
chrX	3639792	3639981	gesPSI:0.10455873	950	-	3639792	3639981	0	2	50,50	0,139
chrIII	3643059	3643214	gesPSI:0.87819400	950	+	3643059	3643214	0	2	50,50	0,105
chrIII	3643059	3643207	gesPSI:0.12180600	950	+	3643059	3643207	0	2	50,50	0,98
chrI	3703729	3704045	gesPSI:0.93184489	950	+	3703729	3704045	0	2	50,50	0,266
chrI	3703729	3704035	gesPSI:0.06815511	950	+	3703729	3704035	0	2	50,50	0,256
chrIII	3728207	3728356	gesPSI:0.90286294	950	-	3728207	3728356	0	2	50,50	0,99
chrIII	3728214	3728356	gesPSI:0.09713706	950	-	3728214	3728356	0	2	50,50	0,92
chrX	3777009	3777891	gesPSI:0.83339709	950	+	3777009	3777891	0	2	50,50	0,832
chrX	3776970	3777891	gesPSI:0.16660291	950	+	3776970	3777891	0	2	50,50	0,871
chrIV	3795293	3795683	gesPSI:0.17305459	950	+	3795293	3795683	0	2	50,50	0,340
chrIV	3795293	3795785	gesPSI:0.82694541	950	+	3795293	3795785	0	2	50,50	0,442
chrI	3799976	3800241	gesPSI:0.76852941	950	-	3799976	3800241	0	2	50,50	0,215
chrI	3799982	3800241	gesPSI:0.23147059	950	-	3799982	3800241	0	2	50,50	0,209
chrIV	3803587	3803755	gesPSI:0.36270023	950	+	3803587	3803755	0	2	50,50	0,118
chrIV	3803583	3803755	gesPSI:0.63729977	950	+	3803583	3803755	0	2	50,50	0,122
chrIII	3830878	3831113	gesPSI:0.30633117	950	-	3830878	3831113	0	2	50,50	0,185
chrIII	3830878	3831058	gesPSI:0.69366883	950	-	3830878	3831058	0	2	50,50	0,130
chrIII	3858995	3859142	gesPSI:0.67256503	950	-	3858995	3859142	0	2	50,50	0,97
chrIII	3858995	3859145	gesPSI:0.32743497	950	-	3858995	3859145	0	2	50,50	0,100
chrIII	3870227	3870375	gesPSI:0.59327201	950	-	3870227	3870375	0	2	50,50	0,98
chrIII	3870218	3870375	gesPSI:0.40672799	950	-	3870218	3870375	0	2	50,50	0,107
chrII	3926035	3926966	gesPSI:0.22346230	950	-	3926035	3926966	0	2	50,50	0,881
chrII	3926029	3926966	gesPSI:0.77653770	950	-	3926029	3926966	0	2	50,50	0,887
chrIII	3965836	3966416	gesPSI:0.20111446	950	-	3965836	3966416	0	2	50,50	0,530
chrIII	3965827	3966416	gesPSI:0.79888554	950	-	3965827	3966416	0	2	50,50	0,539
chrI	4002458	4002601	gesPSI:0.25024433	950	-	4002458	4002601	0	2	50,50	0,93
chrI	4002458	4002646	gesPSI:0.74975567	950	-	4002458	4002646	0	2	50,50	0,138
chrV	4039186	4039335	gesPSI:0.87246777	950	+	4039186	4039335	0	2	50,50	0,99
chrV	4039184	4039335	gesPSI:0.12753223	950	+	4039184	4039335	0	2	50,50	0,101
chrI	4136468	4136819	gesPSI:0.05504456	950	-	4136468	4136819	0	2	50,50	0,301
chrI	4136468	4136944	gesPSI:0.94495544	950	-	4136468	4136944	0	2	50,50	0,426
chrIII	4147656	4147833	gesPSI:0.20663781	950	-	4147656	4147833	0	2	50,50	0,127
chrIII	4147656	4147829	gesPSI:0.79336219	950	-	4147656	4147829	0	2	50,50	0,123
chrX	4150216	4150357	gesPSI:0.40547957	950	-	4150216	4150357	0	2	50,50	0,91
chrX	4150210	4150357	gesPSI:0.59452043	950	-	4150210	4150357	0	2	50,50	0,97
chrX	4176313	4176533	gesPSI:0.27176142	950	-	4176313	4176533	0	2	50,50	0,170
chrX	4176313	4176551	gesPSI:0.72823858	950	-	4176313	4176551	0	2	50,50	0,188
chrV	4188482	4188663	gesPSI:0.56108923	950	+	4188482	4188663	0	2	50,50	0,131
chrV	4188482	4188658	gesPSI:0.43891077	950	+	4188482	4188658	0	2	50,50	0,126
chrX	4246794	4246937	gesPSI:0.66591670	950	-	4246794	4246937	0	2	50,50	0,93
chrX	4246786	4246937	gesPSI:0.33408330	950	-	4246786	4246937	0	2	50,50	0,101
chrIII	4277330	4277854	gesPSI:0.68800594	950	-	4277330	4277854	0	2	50,50	0,474
chrIII	4277321	4277854	gesPSI:0.31199406	950	-	4277321	4277854	0	2	50,50	0,483
chrI	4304302	4305508	gesPSI:0.18152671	950	+	4304302	4305508	0	2	50,50	0,1156
chrI	4303996	4305508	gesPSI:0.81847329	950	+	4303996	4305508	0	2	50,50	0,1462
chrIII	4315550	4316104	gesPSI:0.05963695	950	+	4315550	4316104	0	2	50,50	0,504
chrIII	4315550	4316110	gesPSI:0.94036305	950	+	4315550	4316110	0	2	50,50	0,510
chrII	4336220	4337113	gesPSI:0.76356322	950	+	4336220	4337113	0	2	50,50	0,843
chrII	4336220	4337122	gesPSI:0.23643678	950	+	4336220	4337122	0	2	50,50	0,852
chrIII	4339569	4340064	gesPSI:0.61714691	950	+	4339569	4340064	0	2	50,50	0,445
chrIII	4339569	4340055	gesPSI:0.38285309	950	+	4339569	4340055	0	2	50,50	0,436
chrV	4372843	4372986	gesPSI:0.35425189	950	+	4372843	4372986	0	2	50,50	0,93
chrV	4372843	4373001	gesPSI:0.64574811	950	+	4372843	4373001	0	2	50,50	0,108
chrV	4440952	4441506	gesPSI:0.71342383	950	-	4440952	4441506	0	2	50,50	0,504
chrV	4440945	4441506	gesPSI:0.28657617	950	-	4440945	4441506	0	2	50,50	0,511
chrII	4458495	4458645	gesPSI:0.27959138	950	-	4458495	4458645	0	2	50,50	0,100
chrII	4458495	4458642	gesPSI:0.72040862	950	-	4458495	4458642	0	2	50,50	0,97
chrIV	4469233	4469385	gesPSI:0.69587760	950	-	4469233	4469385	0	2	50,50	0,102
chrIV	4469233	4469379	gesPSI:0.30412240	950	-	4469233	4469379	0	2	50,50	0,96
chrIV	4515425	4515596	gesPSI:0.74329485	950	-	4515425	4515596	0	2	50,50	0,121
chrIV	4515425	4515731	gesPSI:0.25670515	950	-	4515425	4515731	0	2	50,50	0,256
chrII	4521176	4521328	gesPSI:0.47839365	950	+	4521176	4521328	0	2	50,50	0,102
chrII	4521176	4521316	gesPSI:0.52160635	950	+	4521176	4521316	0	2	50,50	0,90
chrII	4521646	4522024	gesPSI:0.63405119	950	+	4521646	4522024	0	2	50,50	0,328
chrII	4521668	4522024	gesPSI:0.36594881	950	+	4521668	4522024	0	2	50,50	0,306
chrI	4526653	4527791	gesPSI:0.63482742	950	-	4526653	4527791	0	2	50,50	0,1088
chrI	4526662	4527791	gesPSI:0.36517258	950	-	4526662	4527791	0	2	50,50	0,1079
chrIII	4559532	4559680	gesPSI:0.48614846	950	+	4559532	4559680	0	2	50,50	0,98
chrIII	4559532	4559687	gesPSI:0.51385154	950	+	4559532	4559687	0	2	50,50	0,105
chrIII	4580735	4580880	gesPSI:0.35499558	950	+	4580735	4580880	0	2	50,50	0,95
chrIII	4580735	4580889	gesPSI:0.64500442	950	+	4580735	4580889	0	2	50,50	0,104
chrI	4612966	4613328	gesPSI:0.74820114	950	-	4612966	4613328	0	2	50,50	0,312
chrI	4612972	4613328	gesPSI:0.25179886	950	-	4612972	4613328	0	2	50,50	0,306
chrV	4616334	4616476	gesPSI:0.08280069	950	+	4616334	4616476	0	2	50,50	0,92
chrV	4616334	4616482	gesPSI:0.91719931	950	+	4616334	4616482	0	2	50,50	0,98
chrII	4652600	4653102	gesPSI:0.39448888	950	+	4652600	4653102	0	2	50,50	0,452
chrII	4652600	4653111	gesPSI:0.60551112	950	+	4652600	4653111	0	2	50,50	0,461
chrI	4657437	4657988	gesPSI:0.90396249	950	+	4657437	4657988	0	2	50,50	0,501
chrI	4657377	4657988	gesPSI:0.09603751	950	+	4657377	4657988	0	2	50,50	0,561
chrIII	4660878	4661027	gesPSI:0.64308528	950	+	4660878	4661027	0	2	50,50	0,99
chrIII	4660878	4661057	gesPSI:0.35691472	950	+	4660878	4661057	0	2	50,50	0,129
chrV	4687138	4687289	gesPSI:0.62554530	950	+	4687138	4687289	0	2	50,50	0,101
chrV	4687138	4687280	gesPSI:0.37445470	950	+	4687138	4687280	0	2	50,50	0,92
chrII	4702845	4703014	gesPSI:0.90101149	950	+	4702845	4703014	0	2	50,50	0,119
chrII	4702845	4703034	gesPSI:0.09898851	950	+	4702845	4703034	0	2	50,50	0,139
chrIV	4708537	4709371	gesPSI:0.94209228	950	-	4708537	4709371	0	2	50,50	0,784
chrIV	4708546	4709371	gesPSI:0.05790772	950	-	4708546	4709371	0	2	50,50	0,775
chrX	4710212	4710366	gesPSI:0.43983060	950	-	4710212	4710366	0	2	50,50	0,104
chrX	4710212	4710360	gesPSI:0.56016940	950	-	4710212	4710360	0	2	50,50	0,98
chrIII	4713054	4713240	gesPSI:0.43252054	950	-	4713054	4713240	0	2	50,50	0,136
chrIII	4713048	4713240	gesPSI:0.56747946	950	-	4713048	4713240	0	2	50,50	0,142
chrIV	4750621	4750764	gesPSI:0.07077284	950	+	4750621	4750764	0	2	50,50	0,93
chrIV	4750621	4750769	gesPSI:0.92922716	950	+	4750621	4750769	0	2	50,50	0,98
chrI	4771439	4771670	gesPSI:0.41578220	950	-	4771439	4771670	0	2	50,50	0,181
chrI	4771439	4771653	gesPSI:0.58421780	950	-	4771439	4771653	0	2	50,50	0,164
chrIII	4807092	4807733	gesPSI:0.52908805	950	-	4807092	4807733	0	2	50,50	0,591
chrIII	4807098	4807733	gesPSI:0.47091195	950	-	4807098	4807733	0	2	50,50	0,585
chrI	4849340	4849596	gesPSI:0.57262342	950	+	4849340	4849596	0	2	50,50	0,206
chrI	4849310	4849596	gesPSI:0.42737658	950	+	4849310	4849596	0	2	50,50	0,236
chrX	4855365	4855765	gesPSI:0.13408521	950	-	4855365	4855765	0	2	50,50	0,350
chrX	4855371	4855765	gesPSI:0.86591479	950	-	4855371	4855765	0	2	50,50	0,344
chrIII	4901421	4902098	gesPSI:0.16928205	950	+	4901421	4902098	0	2	50,50	0,627
chrIII	4901421	4902104	gesPSI:0.83071795	950	+	4901421	4902104	0	2	50,50	0,633
chrIII	4919189	4919335	gesPSI:0.16707695	950	-	4919189	4919335	0	2	50,50	0,96
chrIII	4919183	4919335	gesPSI:0.83292305	950	-	4919183	4919335	0	2	50,50	0,102
chrI	4921400	4922047	gesPSI:0.39921976	950	-	4921400	4922047	0	2	50,50	0,597
chrI	4921394	4922047	gesPSI:0.60078024	950	-	4921394	4922047	0	2	50,50	0,603
chrII	4951497	4951641	gesPSI:0.36135684	950	+	4951497	4951641	0	2	50,50	0,94
chrII	4951497	4951650	gesPSI:0.63864316	950	+	4951497	4951650	0	2	50,50	0,103
chrII	4996873	4997024	gesPSI:0.39109205	950	+	4996873	4997024	0	2	50,50	0,101
chrII	4996873	4997043	gesPSI:0.60890795	950	+	4996873	4997043	0	2	50,50	0,120
chrX	5019400	5019560	gesPSI:0.06863554	950	+	5019400	5019560	0	2	50,50	0,110
chrX	5019346	5019560	gesPSI:0.93136446	950	+	5019346	5019560	0	2	50,50	0,164
chrI	5106338	5106489	gesPSI:0.94760274	950	+	5106338	5106489	0	2	50,50	0,101
chrI	5106342	5106489	gesPSI:0.05239726	950	+	5106342	5106489	0	2	50,50	0,97
chrX	5111284	5111472	gesPSI:0.21382710	950	+	5111284	5111472	0	2	50,50	0,138
chrX	5111259	5111472	gesPSI:0.78617290	950	+	5111259	5111472	0	2	50,50	0,163
chrI	5137638	5137780	gesPSI:0.09743911	950	+	5137638	5137780	0	2	50,50	0,92
chrI	5137638	5137789	gesPSI:0.90256089	950	+	5137638	5137789	0	2	50,50	0,101
chrII	5184064	5184508	gesPSI:0.18936567	950	-	5184064	5184508	0	2	50,50	0,394
chrII	5184054	5184508	gesPSI:0.81063433	950	-	5184054	5184508	0	2	50,50	0,404
chrI	5184716	5184876	gesPSI:0.86367397	950	+	5184716	5184876	0	2	50,50	0,110
chrI	5184716	5184867	gesPSI:0.13632603	950	+	5184716	5184867	0	2	50,50	0,101
chrI	5192795	5192944	gesPSI:0.80513784	950	+	5192795	5192944	0	2	50,50	0,99
chrI	5192791	5192944	gesPSI:0.19486216	950	+	5192791	5192944	0	2	50,50	0,103
chrII	5210213	5210354	gesPSI:0.46655738	950	-	5210213	5210354	0	2	50,50	0,91
chrII	5210201	5210354	gesPSI:0.53344262	950	-	5210201	5210354	0	2	50,50	0,103
chrX	5272289	5272447	gesPSI:0.90825826	950	-	5272289	5272447	0	2	50,50	0,108
chrX	5272275	5272447	gesPSI:0.09174174	950	-	5272275	5272447	0	2	50,50	0,122
chrI	5302597	5302746	gesPSI:0.87235391	950	-	5302597	5302746	0	2	50,50	0,99
chrI	5302607	5302746	gesPSI:0.12764609	950	-	5302607	5302746	0	2	50,50	0,89
chrIII	5347076	5347549	gesPSI:0.47204625	950	-	5347076	5347549	0	2	50,50	0,423
chrIII	5347070	5347549	gesPSI:0.52795375	950	-	5347070	5347549	0	2	50,50	0,429
chrI	5349273	5349421	gesPSI:0.12440191	950	+	5349273	5349421	0	2	50,50	0,98
chrI	5349278	5349421	gesPSI:0.87559809	950	+	5349278	5349421	0	2	50,50	0,93
chrIV	5351533	5351856	gesPSI:0.23691196	950	-	5351533	5351856	0	2	50,50	0,273
chrIV	5351533	5351848	gesPSI:0.76308804	950	-	5351533	5351848	0	2	50,50	0,265
chrI	5364158	5364720	gesPSI:0.58441892	950	+	5364158	5364720	0	2	50,50	0,512
chrI	5364070	5364720	gesPSI:0.41558108	950	+	5364070	5364720	0	2	50,50	0,600
chrV	5366517	5366663	gesPSI:0.09064807	950	+	5366517	5366663	0	2	50,50	0,96
chrV	5366519	5366663	gesPSI:0.90935193	950	+	5366519	5366663	0	2	50,50	0,94
chrIII	5476479	5477603	gesPSI:0.83441986	950	+	5476479	5477603	0	2	50,50	0,1074
chrIII	5476446	5477603	gesPSI:0.16558014	950	+	5476446	5477603	0	2	50,50	0,1107
chrIV	5540142	5540379	gesPSI:0.27465043	950	+	5540142	5540379	0	2	50,50	0,187
chrIV	5540163	5540379	gesPSI:0.72534957	950	+	5540163	5540379	0	2	50,50	0,166
chrIII	5548209	5548366	gesPSI:0.10227273	950	+	5548209	5548366	0	2	50,50	0,107
chrIII	5548209	5548363	gesPSI:0.89772727	950	+	5548209	5548363	0	2	50,50	0,104
chrII	5621028	5621180	gesPSI:0.88621339	950	-	5621028	5621180	0	2	50,50	0,102
chrII	5621037	5621180	gesPSI:0.11378661	950	-	5621037	5621180	0	2	50,50	0,93
chrII	5624441	5624612	gesPSI:0.15470052	950	+	5624441	5624612	0	2	50,50	0,121
chrII	5624441	5624618	gesPSI:0.84529948	950	+	5624441	5624618	0	2	50,50	0,127
chrII	5630209	5630920	gesPSI:0.44862822	950	-	5630209	5630920	0	2	50,50	0,661
chrII	5630203	5630920	gesPSI:0.55137178	950	-	5630203	5630920	0	2	50,50	0,667
chrII	5632903	5633099	gesPSI:0.81308801	950	+	5632903	5633099	0	2	50,50	0,146
chrII	5632903	5633093	gesPSI:0.18691199	950	+	5632903	5633093	0	2	50,50	0,140
chrV	5682235	5682618	gesPSI:0.91498714	950	-	5682235	5682618	0	2	50,50	0,333
chrV	5682243	5682618	gesPSI:0.08501286	950	-	5682243	5682618	0	2	50,50	0,325
chrIII	5693164	5693313	gesPSI:0.48535224	950	+	5693164	5693313	0	2	50,50	0,99
chrIII	5693164	5693304	gesPSI:0.51464776	950	+	5693164	5693304	0	2	50,50	0,90
chrIII	5703065	5703206	gesPSI:0.23800235	950	-	5703065	5703206	0	2	50,50	0,91
chrIII	5703059	5703206	gesPSI:0.76199765	950	-	5703059	5703206	0	2	50,50	0,97
chrV	5774232	5774649	gesPSI:0.78446236	950	-	5774232	5774649	0	2	50,50	0,367
chrV	5774232	5774601	gesPSI:0.21553764	950	-	5774232	5774601	0	2	50,50	0,319
chrIV	5828819	5829762	gesPSI:0.88672059	950	+	5828819	5829762	0	2	50,50	0,893
chrIV	5828804	5829762	gesPSI:0.11327941	950	+	5828804	5829762	0	2	50,50	0,908
chrI	5875134	5875342	gesPSI:0.94570057	950	-	5875134	5875342	0	2	50,50	0,158
chrI	5875134	5875330	gesPSI:0.05429943	950	-	5875134	5875330	0	2	50,50	0,146
chrII	5907017	5907168	gesPSI:0.46475588	950	+	5907017	5907168	0	2	50,50	0,101
chrII	5907017	5907159	gesPSI:0.53524412	950	+	5907017	5907159	0	2	50,50	0,92
chrI	5945763	5945908	gesPSI:0.37270764	950	-	5945763	5945908	0	2	50,50	0,95
chrI	5945755	5945908	gesPSI:0.62729236	950	-	5945755	5945908	0	2	50,50	0,103
chrIII	5946643	5946793	gesPSI:0.87772285	950	-	5946643	5946793	0	2	50,50	0,100
chrIII	5946649	5946793	gesPSI:0.12227715	950	-	5946649	5946793	0	2	50,50	0,94
chrIII	5971730	5972558	gesPSI:0.45966145	950	-	5971730	5972558	0	2	50,50	0,778
chrIII	5971730	5972611	gesPSI:0.49257173	950	-	5971730	5972611	0	2	50,50	0,831
chrI	5982427	5982578	gesPSI:0.09121984	950	-	5982427	5982578	0	2	50,50	0,101
chrI	5982427	5982583	gesPSI:0.90878016	950	-	5982427	5982583	0	2	50,50	0,106
chrX	6032861	6033015	gesPSI:0.87356833	950	+	6032861	6033015	0	2	50,50	0,104
chrX	6032861	6033018	gesPSI:0.12643167	950	+	6032861	6033018	0	2	50,50	0,107
chrI	6071430	6071828	gesPSI:0.49684707	950	-	6071430	6071828	0	2	50,50	0,348
chrI	6071430	6071774	gesPSI:0.50315293	950	-	6071430	6071774	0	2	50,50	0,294
chrI	6108778	6108923	gesPSI:0.67341215	950	-	6108778	6108923	0	2	50,50	0,95
chrI	6108778	6108936	gesPSI:0.32658785	950	-	6108778	6108936	0	2	50,50	0,108
chrI	6125543	6125700	gesPSI:0.81537196	950	+	6125543	6125700	0	2	50,50	0,107
chrI	6125543	6125694	gesPSI:0.18462804	950	+	6125543	6125694	0	2	50,50	0,101
chrIII	6196302	6196485	gesPSI:0.28543116	950	-	6196302	6196485	0	2	50,50	0,133
chrIII	6196302	6196512	gesPSI:0.71456884	950	-	6196302	6196512	0	2	50,50	0,160
chrII	6197442	6197585	gesPSI:0.52746723	950	+	6197442	6197585	0	2	50,50	0,93
chrII	6197436	6197585	gesPSI:0.47253277	950	+	6197436	6197585	0	2	50,50	0,99
chrIII	6247252	6247406	gesPSI:0.77913534	950	-	6247252	6247406	0	2	50,50	0,104
chrIII	6247261	6247406	gesPSI:0.22086466	950	-	6247261	6247406	0	2	50,50	0,95
chrIV	6255425	6256324	gesPSI:0.49034518	950	-	6255425	6256324	0	2	50,50	0,849
chrIV	6255425	6256320	gesPSI:0.50965482	950	-	6255425	6256320	0	2	50,50	0,845
chrV	6258874	6259030	gesPSI:0.87837515	950	-	6258874	6259030	0	2	50,50	0,106
chrV	6258885	6259030	gesPSI:0.12162485	950	-	6258885	6259030	0	2	50,50	0,95
chrX	6273112	6273280	gesPSI:0.16058799	950	+	6273112	6273280	0	2	50,50	0,118
chrX	6273112	6273256	gesPSI:0.83941201	950	+	6273112	6273256	0	2	50,50	0,94
chrV	6284536	6284751	gesPSI:0.36365012	950	+	6284536	6284751	0	2	50,50	0,165
chrV	6284583	6284751	gesPSI:0.63634988	950	+	6284583	6284751	0	2	50,50	0,118
chrIV	6325183	6325369	gesPSI:0.68515390	950	+	6325183	6325369	0	2	50,50	0,136
chrIV	6325183	6325360	gesPSI:0.31484610	950	+	6325183	6325360	0	2	50,50	0,127
chrI	6358698	6358847	gesPSI:0.47788828	950	+	6358698	6358847	0	2	50,50	0,99
chrI	6358698	6358841	gesPSI:0.52211172	950	+	6358698	6358841	0	2	50,50	0,93
chrII	6373713	6373860	gesPSI:0.77889355	950	+	6373713	6373860	0	2	50,50	0,97
chrII	6373713	6373854	gesPSI:0.22110645	950	+	6373713	6373854	0	2	50,50	0,91
chrIII	6416439	6416717	gesPSI:0.08443352	950	-	6416439	6416717	0	2	50,50	0,228
chrIII	6416439	6416721	gesPSI:0.91556648	950	-	6416439	6416721	0	2	50,50	0,232
chrV	6427283	6428095	gesPSI:0.28019035	950	-	6427283	6428095	0	2	50,50	0,762
chrV	6427621	6428095	gesPSI:0.71980965	950	-	6427621	6428095	0	2	50,50	0,424
chrI	6462879	6463121	gesPSI:0.26866860	950	+	6462879	6463121	0	2	50,50	0,192
chrI	6462879	6463118	gesPSI:0.73133140	950	+	6462879	6463118	0	2	50,50	0,189
chrIII	6470871	6471026	gesPSI:0.77257800	950	+	6470871	6471026	0	2	50,50	0,105
chrIII	6470871	6471020	gesPSI:0.22742200	950	+	6470871	6471020	0	2	50,50	0,99
chrX	6497285	6497987	gesPSI:0.17176871	950	-	6497285	6497987	0	2	50,50	0,652
chrX	6497204	6497987	gesPSI:0.82823129	950	-	6497204	6497987	0	2	50,50	0,733
chrI	6499992	6500141	gesPSI:0.92059883	950	+	6499992	6500141	0	2	50,50	0,99
chrI	6499783	6500141	gesPSI:0.07940117	950	+	6499783	6500141	0	2	50,50	0,308
chrV	6532120	6532279	gesPSI:0.11213528	950	-	6532120	6532279	0	2	50,50	0,109
chrV	6532120	6532267	gesPSI:0.88786472	950	-	6532120	6532267	0	2	50,50	0,97
chrX	6558601	6558937	gesPSI:0.26535594	950	+	6558601	6558937	0	2	50,50	0,286
chrX	6558590	6558937	gesPSI:0.73464406	950	+	6558590	6558937	0	2	50,50	0,297
chrIV	6566298	6567111	gesPSI:0.70408708	950	-	6566298	6567111	0	2	50,50	0,763
chrIV	6566298	6567150	gesPSI:0.29591292	950	-	6566298	6567150	0	2	50,50	0,802
chrI	6568484	6568629	gesPSI:0.10834939	950	+	6568484	6568629	0	2	50,50	0,95
chrI	6568481	6568629	gesPSI:0.89165061	950	+	6568481	6568629	0	2	50,50	0,98
chrI	6584105	6584318	gesPSI:0.29308394	950	+	6584105	6584318	0	2	50,50	0,163
chrI	6584105	6584324	gesPSI:0.70691606	950	+	6584105	6584324	0	2	50,50	0,169
chrV	6606855	6607554	gesPSI:0.21259613	950	-	6606855	6607554	0	2	50,50	0,649
chrV	6606855	6607520	gesPSI:0.78740387	950	-	6606855	6607520	0	2	50,50	0,615
chrIV	6629318	6629470	gesPSI:0.62513514	950	-	6629318	6629470	0	2	50,50	0,102
chrIV	6629318	6629466	gesPSI:0.37486486	950	-	6629318	6629466	0	2	50,50	0,98
chrIII	6726396	6726535	gesPSI:0.24963406	950	+	6726396	6726535	0	2	50,50	0,89
chrIII	6726396	6726544	gesPSI:0.75036594	950	+	6726396	6726544	0	2	50,50	0,98
chrIII	6733080	6733228	gesPSI:0.18570513	950	+	6733080	6733228	0	2	50,50	0,98
chrIII	6733080	6733234	gesPSI:0.81429487	950	+	6733080	6733234	0	2	50,50	0,104
chrIV	6760515	6760668	gesPSI:0.85911017	950	+	6760515	6760668	0	2	50,50	0,103
chrIV	6760515	6760659	gesPSI:0.14088983	950	+	6760515	6760659	0	2	50,50	0,94
chrI	6796716	6796922	gesPSI:0.49952094	950	+	6796716	6796922	0	2	50,50	0,156
chrI	6796716	6796916	gesPSI:0.50047906	950	+	6796716	6796916	0	2	50,50	0,150
chrII	6846437	6846586	gesPSI:0.52766180	950	+	6846437	6846586	0	2	50,50	0,99
chrII	6846437	6846580	gesPSI:0.47233820	950	+	6846437	6846580	0	2	50,50	0,93
chrII	6854093	6854243	gesPSI:0.63468250	950	-	6854093	6854243	0	2	50,50	0,100
chrII	6854099	6854243	gesPSI:0.36531750	950	-	6854099	6854243	0	2	50,50	0,94
chrIII	6866642	6866800	gesPSI:0.28977493	950	-	6866642	6866800	0	2	50,50	0,108
chrIII	6866642	6866815	gesPSI:0.71022507	950	-	6866642	6866815	0	2	50,50	0,123
chrX	6925945	6926099	gesPSI:0.29990805	950	-	6925945	6926099	0	2	50,50	0,104
chrX	6925936	6926099	gesPSI:0.70009195	950	-	6925936	6926099	0	2	50,50	0,113
chrI	6990690	6990845	gesPSI:0.68753573	950	+	6990690	6990845	0	2	50,50	0,105
chrI	6990690	6990836	gesPSI:0.31246427	950	+	6990690	6990836	0	2	50,50	0,96
chrX	7029199	7029373	gesPSI:0.11281604	950	+	7029199	7029373	0	2	50,50	0,124
chrX	7029199	7029382	gesPSI:0.88718396	950	+	7029199	7029382	0	2	50,50	0,133
chrI	7047837	7047994	gesPSI:0.32870370	950	+	7047837	7047994	0	2	50,50	0,107
chrI	7047837	7047985	gesPSI:0.67129630	950	+	7047837	7047985	0	2	50,50	0,98
chrIV	7051599	7051777	gesPSI:0.67410139	950	+	7051599	7051777	0	2	50,50	0,128
chrIV	7051599	7051825	gesPSI:0.32589861	950	+	7051599	7051825	0	2	50,50	0,176
chrII	7055834	7055975	gesPSI:0.35980003	950	+	7055834	7055975	0	2	50,50	0,91
chrII	7055834	7055982	gesPSI:0.64019997	950	+	7055834	7055982	0	2	50,50	0,98
chrV	7062026	7062238	gesPSI:0.40555721	950	+	7062026	7062238	0	2	50,50	0,162
chrV	7062008	7062238	gesPSI:0.59444279	950	+	7062008	7062238	0	2	50,50	0,180
chrIII	7092524	7092711	gesPSI:0.92021069	950	+	7092524	7092711	0	2	50,50	0,137
chrIII	7092417	7092711	gesPSI:0.07978931	950	+	7092417	7092711	0	2	50,50	0,244
chrII	7101017	7101164	gesPSI:0.41944657	950	-	7101017	7101164	0	2	50,50	0,97
chrII	7101017	7101160	gesPSI:0.58055343	950	-	7101017	7101160	0	2	50,50	0,93
chrIV	7104376	7104557	gesPSI:0.13172741	950	+	7104376	7104557	0	2	50,50	0,131
chrIV	7104394	7104557	gesPSI:0.86827259	950	+	7104394	7104557	0	2	50,50	0,113
chrII	7123734	7123959	gesPSI:0.90312806	950	+	7123734	7123959	0	2	50,50	0,175
chrII	7123734	7123962	gesPSI:0.09687194	950	+	7123734	7123962	0	2	50,50	0,178
chrIII	7134958	7136323	gesPSI:0.93556168	950	+	7134958	7136323	0	2	50,50	0,1315
chrIII	7136068	7136323	gesPSI:0.06443832	950	+	7136068	7136323	0	2	50,50	0,205
chrIV	7150739	7150929	gesPSI:0.25039150	950	-	7150739	7150929	0	2	50,50	0,140
chrIV	7150751	7150929	gesPSI:0.74960850	950	-	7150751	7150929	0	2	50,50	0,128
chrIII	7183567	7183710	gesPSI:0.17888592	950	+	7183567	7183710	0	2	50,50	0,93
chrIII	7183567	7183716	gesPSI:0.82111408	950	+	7183567	7183716	0	2	50,50	0,99
chrIV	7232355	7232560	gesPSI:0.80779776	950	+	7232355	7232560	0	2	50,50	0,155
chrIV	7232367	7232560	gesPSI:0.19220224	950	+	7232367	7232560	0	2	50,50	0,143
chrI	7258368	7258526	gesPSI:0.30380772	950	+	7258368	7258526	0	2	50,50	0,108
chrI	7258368	7258518	gesPSI:0.69619228	950	+	7258368	7258518	0	2	50,50	0,100
chrI	7281917	7282135	gesPSI:0.46551205	950	-	7281917	7282135	0	2	50,50	0,168
chrI	7281917	7282159	gesPSI:0.53448795	950	-	7281917	7282159	0	2	50,50	0,192
chrII	7292350	7292491	gesPSI:0.63998258	950	-	7292350	7292491	0	2	50,50	0,91
chrII	7292341	7292491	gesPSI:0.36001742	950	-	7292341	7292491	0	2	50,50	0,100
chrI	7304146	7304297	gesPSI:0.36479177	950	-	7304146	7304297	0	2	50,50	0,101
chrI	7304146	7304293	gesPSI:0.63520823	950	-	7304146	7304293	0	2	50,50	0,97
chrIII	7310188	7310407	gesPSI:0.59953287	950	-	7310188	7310407	0	2	50,50	0,169
chrIII	7310227	7310407	gesPSI:0.40046713	950	-	7310227	7310407	0	2	50,50	0,130
chrI	7322550	7322807	gesPSI:0.59943097	950	-	7322550	7322807	0	2	50,50	0,207
chrI	7322545	7322807	gesPSI:0.40056903	950	-	7322545	7322807	0	2	50,50	0,212
chrIII	7333372	7333657	gesPSI:0.60132490	950	-	7333372	7333657	0	2	50,50	0,235
chrIII	7333381	7333657	gesPSI:0.39867510	950	-	7333381	7333657	0	2	50,50	0,226
chrII	7348223	7348373	gesPSI:0.63359562	950	+	7348223	7348373	0	2	50,50	0,100
chrII	7348223	7348367	gesPSI:0.36640438	950	+	7348223	7348367	0	2	50,50	0,94
chrI	7350556	7350700	gesPSI:0.42110811	950	-	7350556	7350700	0	2	50,50	0,94
chrI	7350550	7350700	gesPSI:0.57889189	950	-	7350550	7350700	0	2	50,50	0,100
chrV	7434552	7434889	gesPSI:0.17698504	950	-	7434552	7434889	0	2	50,50	0,287
chrV	7434552	7434894	gesPSI:0.82301496	950	-	7434552	7434894	0	2	50,50	0,292
chrX	7489023	7489724	gesPSI:0.11464343	950	+	7489023	7489724	0	2	50,50	0,651
chrX	7488738	7489724	gesPSI:0.88535657	950	+	7488738	7489724	0	2	50,50	0,936
chrIV	7550977	7551424	gesPSI:0.52140895	950	+	7550977	7551424	0	2	50,50	0,397
chrIV	7550977	7551418	gesPSI:0.47859105	950	+	7550977	7551418	0	2	50,50	0,391
chrII	7571686	7571884	gesPSI:0.73645320	950	+	7571686	7571884	0	2	50,50	0,148
chrII	7571698	7571884	gesPSI:0.26354680	950	+	7571698	7571884	0	2	50,50	0,136
chrII	7586112	7586753	gesPSI:0.61140820	950	-	7586112	7586753	0	2	50,50	0,591
chrII	7586112	7586757	gesPSI:0.38859180	950	-	7586112	7586757	0	2	50,50	0,595
chrII	7597963	7598130	gesPSI:0.15816133	950	-	7597963	7598130	0	2	50,50	0,117
chrII	7597966	7598130	gesPSI:0.84183867	950	-	7597966	7598130	0	2	50,50	0,114
chrI	7600283	7600484	gesPSI:0.15693532	950	+	7600283	7600484	0	2	50,50	0,151
chrI	7600283	7600460	gesPSI:0.84306468	950	+	7600283	7600460	0	2	50,50	0,127
chrII	7669753	7669895	gesPSI:0.38651781	950	+	7669753	7669895	0	2	50,50	0,92
chrII	7669327	7669895	gesPSI:0.61348219	950	+	7669327	7669895	0	2	50,50	0,518
chrIII	7679600	7679757	gesPSI:0.12152433	950	-	7679600	7679757	0	2	50,50	0,107
chrIII	7679600	7679747	gesPSI:0.87847567	950	-	7679600	7679747	0	2	50,50	0,97
chrI	7696603	7696742	gesPSI:0.28238796	950	+	7696603	7696742	0	2	50,50	0,89
chrI	7696603	7696751	gesPSI:0.71761204	950	+	7696603	7696751	0	2	50,50	0,98
chrII	7769397	7769659	gesPSI:0.21530383	950	-	7769397	7769659	0	2	50,50	0,212
chrII	7769397	7770020	gesPSI:0.78469617	950	-	7769397	7770020	0	2	50,50	0,573
chrIII	7775809	7775951	gesPSI:0.29597955	950	-	7775809	7775951	0	2	50,50	0,92
chrIII	7775803	7775951	gesPSI:0.70402045	950	-	7775803	7775951	0	2	50,50	0,98
chrIV	7795061	7795254	gesPSI:0.48995013	950	-	7795061	7795254	0	2	50,50	0,143
chrIV	7795067	7795254	gesPSI:0.51004987	950	-	7795067	7795254	0	2	50,50	0,137
chrIV	7822125	7822554	gesPSI:0.87799651	950	-	7822125	7822554	0	2	50,50	0,379
chrIV	7822125	7822539	gesPSI:0.12200349	950	-	7822125	7822539	0	2	50,50	0,364
chrX	7827373	7828140	gesPSI:0.86091725	950	-	7827373	7828140	0	2	50,50	0,717
chrX	7827370	7828140	gesPSI:0.13908275	950	-	7827370	7828140	0	2	50,50	0,720
chrI	7847343	7847494	gesPSI:0.78709396	950	-	7847343	7847494	0	2	50,50	0,101
chrI	7847343	7847498	gesPSI:0.21290604	950	-	7847343	7847498	0	2	50,50	0,105
chrIV	7852967	7853120	gesPSI:0.64935722	950	+	7852967	7853120	0	2	50,50	0,103
chrIV	7852967	7853129	gesPSI:0.35064278	950	+	7852967	7853129	0	2	50,50	0,112
chrV	7855848	7856003	gesPSI:0.91758872	950	+	7855848	7856003	0	2	50,50	0,105
chrV	7855848	7855993	gesPSI:0.08241128	950	+	7855848	7855993	0	2	50,50	0,95
chrI	7858236	7858602	gesPSI:0.66103247	950	-	7858236	7858602	0	2	50,50	0,316
chrI	7858243	7858602	gesPSI:0.33896753	950	-	7858243	7858602	0	2	50,50	0,309
chrV	7881093	7881276	gesPSI:0.58815773	950	+	7881093	7881276	0	2	50,50	0,133
chrV	7881093	7881249	gesPSI:0.41184227	950	+	7881093	7881249	0	2	50,50	0,106
chrIII	7885552	7885847	gesPSI:0.79013097	950	-	7885552	7885847	0	2	50,50	0,245
chrIII	7885596	7885847	gesPSI:0.20986903	950	-	7885596	7885847	0	2	50,50	0,201
chrIII	7928034	7928214	gesPSI:0.54093800	950	-	7928034	7928214	0	2	50,50	0,130
chrIII	7928038	7928214	gesPSI:0.45906200	950	-	7928038	7928214	0	2	50,50	0,126
chrIII	7937081	7937239	gesPSI:0.86903929	950	+	7937081	7937239	0	2	50,50	0,108
chrIII	7937081	7937230	gesPSI:0.13096071	950	+	7937081	7937230	0	2	50,50	0,99
chrII	7945744	7946027	gesPSI:0.20865074	950	-	7945744	7946027	0	2	50,50	0,233
chrII	7945752	7946027	gesPSI:0.79134926	950	-	7945752	7946027	0	2	50,50	0,225
chrV	7975014	7975461	gesPSI:0.33737728	950	-	7975014	7975461	0	2	50,50	0,397
chrV	7975014	7975482	gesPSI:0.66262272	950	-	7975014	7975482	0	2	50,50	0,418
chrI	7992384	7992580	gesPSI:0.11682550	950	+	7992384	7992580	0	2	50,50	0,146
chrI	7992384	7992573	gesPSI:0.88317450	950	+	7992384	7992573	0	2	50,50	0,139
chrV	7999718	7999934	gesPSI:0.79481747	950	+	7999718	7999934	0	2	50,50	0,166
chrV	7999255	7999934	gesPSI:0.20518253	950	+	7999255	7999934	0	2	50,50	0,629
chrIII	8012971	8013175	gesPSI:0.77244582	950	+	8012971	8013175	0	2	50,50	0,154
chrIII	8012971	8013169	gesPSI:0.22755418	950	+	8012971	8013169	0	2	50,50	0,148
chrI	8017205	8017833	gesPSI:0.43560067	950	+	8017205	8017833	0	2	50,50	0,578
chrI	8017181	8017833	gesPSI:0.56439933	950	+	8017181	8017833	0	2	50,50	0,602
chrIII	8026524	8026776	gesPSI:0.14053386	950	-	8026524	8026776	0	2	50,50	0,202
chrIII	8026527	8026776	gesPSI:0.85946614	950	-	8026527	8026776	0	2	50,50	0,199
chrIII	8082035	8082185	gesPSI:0.33995915	950	+	8082035	8082185	0	2	50,50	0,100
chrIII	8082035	8082176	gesPSI:0.66004085	950	+	8082035	8082176	0	2	50,50	0,91
chrIV	8082586	8082739	gesPSI:0.79394443	950	+	8082586	8082739	0	2	50,50	0,103
chrIV	8082586	8082730	gesPSI:0.20605557	950	+	8082586	8082730	0	2	50,50	0,94
chrIV	8085228	8085802	gesPSI:0.60329540	950	-	8085228	8085802	0	2	50,50	0,524
chrIV	8085183	8085802	gesPSI:0.39670460	950	-	8085183	8085802	0	2	50,50	0,569
chrIV	8104626	8105213	gesPSI:0.25352243	950	-	8104626	8105213	0	2	50,50	0,537
chrIV	8104620	8105213	gesPSI:0.74647757	950	-	8104620	8105213	0	2	50,50	0,543
chrI	8108208	8108776	gesPSI:0.24819476	950	+	8108208	8108776	0	2	50,50	0,518
chrI	8108208	8108782	gesPSI:0.75180524	950	+	8108208	8108782	0	2	50,50	0,524
chrII	8121512	8121873	gesPSI:0.37069482	950	+	8121512	8121873	0	2	50,50	0,311
chrII	8121512	8121822	gesPSI:0.62930518	950	+	8121512	8121822	0	2	50,50	0,260
chrIII	8234664	8234812	gesPSI:0.06648972	950	-	8234664	8234812	0	2	50,50	0,98
chrIII	8234651	8234812	gesPSI:0.93351028	950	-	8234651	8234812	0	2	50,50	0,111
chrI	8290382	8290532	gesPSI:0.49608357	950	-	8290382	8290532	0	2	50,50	0,100
chrI	8290379	8290532	gesPSI:0.50391643	950	-	8290379	8290532	0	2	50,50	0,103
chrII	8327645	8328107	gesPSI:0.94299487	950	-	8327645	8328107	0	2	50,50	0,412
chrII	8327836	8327982	gesPSI:0.05700513	950	-	8327836	8327982	0	2	50,50	0,96
chrIII	8332226	8332372	gesPSI:0.14305673	950	+	8332226	8332372	0	2	50,50	0,96
chrIII	8332226	8332369	gesPSI:0.85694327	950	+	8332226	8332369	0	2	50,50	0,93
chrIII	8360546	8360774	gesPSI:0.37137887	950	+	8360546	8360774	0	2	50,50	0,178
chrIII	8360546	8360783	gesPSI:0.62862113	950	+	8360546	8360783	0	2	50,50	0,187
chrIV	8376616	8376774	gesPSI:0.88522013	950	-	8376616	8376774	0	2	50,50	0,108
chrIV	8376581	8376774	gesPSI:0.11477987	950	-	8376581	8376774	0	2	50,50	0,143
chrV	8385504	8385917	gesPSI:0.67937497	950	-	8385504	8385917	0	2	50,50	0,363
chrV	8385507	8385917	gesPSI:0.32062503	950	-	8385507	8385917	0	2	50,50	0,360
chrX	8474265	8474411	gesPSI:0.40977405	950	-	8474265	8474411	0	2	50,50	0,96
chrX	8474257	8474411	gesPSI:0.59022595	950	-	8474257	8474411	0	2	50,50	0,104
chrIII	8479293	8479445	gesPSI:0.06724130	950	-	8479293	8479445	0	2	50,50	0,102
chrIII	8479286	8479445	gesPSI:0.93275870	950	-	8479286	8479445	0	2	50,50	0,109
chrIII	8487470	8487797	gesPSI:0.22364469	950	+	8487470	8487797	0	2	50,50	0,277
chrIII	8487470	8487749	gesPSI:0.77635531	950	+	8487470	8487749	0	2	50,50	0,229
chrIII	8488769	8488990	gesPSI:0.32590439	950	-	8488769	8488990	0	2	50,50	0,171
chrIII	8488763	8488990	gesPSI:0.67409561	950	-	8488763	8488990	0	2	50,50	0,177
chrII	8495388	8495560	gesPSI:0.74054983	950	+	8495388	8495560	0	2	50,50	0,122
chrII	8495388	8495554	gesPSI:0.25945017	950	+	8495388	8495554	0	2	50,50	0,116
chrIV	8501760	8501910	gesPSI:0.62174073	950	+	8501760	8501910	0	2	50,50	0,100
chrIV	8501760	8501907	gesPSI:0.37825927	950	+	8501760	8501907	0	2	50,50	0,97
chrIV	8503921	8504106	gesPSI:0.75934905	950	-	8503921	8504106	0	2	50,50	0,135
chrIV	8503927	8504106	gesPSI:0.24065095	950	-	8503927	8504106	0	2	50,50	0,129
chrIII	8517677	8518255	gesPSI:0.14644481	950	+	8517677	8518255	0	2	50,50	0,528
chrIII	8517677	8518263	gesPSI:0.85355519	950	+	8517677	8518263	0	2	50,50	0,536
chrV	8519503	8519650	gesPSI:0.18057644	950	-	8519503	8519650	0	2	50,50	0,97
chrV	8519503	8519658	gesPSI:0.81942356	950	-	8519503	8519658	0	2	50,50	0,105
chrIII	8591705	8591894	gesPSI:0.82291430	950	-	8591705	8591894	0	2	50,50	0,139
chrIII	8591705	8591857	gesPSI:0.17708570	950	-	8591705	8591857	0	2	50,50	0,102
chrIV	8609243	8609475	gesPSI:0.08598733	950	+	8609243	8609475	0	2	50,50	0,182
chrIV	8609259	8609475	gesPSI:0.91401267	950	+	8609259	8609475	0	2	50,50	0,166
chrV	8629738	8629892	gesPSI:0.64123961	950	-	8629738	8629892	0	2	50,50	0,104
chrV	8629749	8629892	gesPSI:0.35876039	950	-	8629749	8629892	0	2	50,50	0,93
chrII	8715521	8715670	gesPSI:0.93274757	950	+	8715521	8715670	0	2	50,50	0,99
chrII	8715525	8715670	gesPSI:0.06725243	950	+	8715525	8715670	0	2	50,50	0,95
chrII	8784998	8785187	gesPSI:0.41550901	950	+	8784998	8785187	0	2	50,50	0,139
chrII	8784998	8785194	gesPSI:0.58449099	950	+	8784998	8785194	0	2	50,50	0,146
chrIV	8816352	8816687	gesPSI:0.09294619	950	+	8816352	8816687	0	2	50,50	0,285
chrIV	8816352	8816723	gesPSI:0.90705381	950	+	8816352	8816723	0	2	50,50	0,321
chrIII	8829742	8829897	gesPSI:0.72200932	950	-	8829742	8829897	0	2	50,50	0,105
chrIII	8829754	8829897	gesPSI:0.27799068	950	-	8829754	8829897	0	2	50,50	0,93
chrII	8878732	8879448	gesPSI:0.30765120	950	-	8878732	8879448	0	2	50,50	0,666
chrII	8878852	8879448	gesPSI:0.69234880	950	-	8878852	8879448	0	2	50,50	0,546
chrIV	8891922	8892098	gesPSI:0.41817098	950	+	8891922	8892098	0	2	50,50	0,126
chrIV	8891922	8892095	gesPSI:0.58182902	950	+	8891922	8892095	0	2	50,50	0,123
chrIV	8927821	8927973	gesPSI:0.72024194	950	+	8927821	8927973	0	2	50,50	0,102
chrIV	8927821	8927967	gesPSI:0.27975806	950	+	8927821	8927967	0	2	50,50	0,96
chrIV	8960793	8960939	gesPSI:0.07846484	950	-	8960793	8960939	0	2	50,50	0,96
chrIV	8960785	8960939	gesPSI:0.92153516	950	-	8960785	8960939	0	2	50,50	0,104
chrII	8962209	8962640	gesPSI:0.91590321	950	-	8962209	8962640	0	2	50,50	0,381
chrII	8962209	8962720	gesPSI:0.08409679	950	-	8962209	8962720	0	2	50,50	0,461
chrV	8976389	8976548	gesPSI:0.17766879	950	-	8976389	8976548	0	2	50,50	0,109
chrV	8976389	8976540	gesPSI:0.82233121	950	-	8976389	8976540	0	2	50,50	0,101
chrII	8998839	8998982	gesPSI:0.47500982	950	+	8998839	8998982	0	2	50,50	0,93
chrII	8998839	8998991	gesPSI:0.52499018	950	+	8998839	8998991	0	2	50,50	0,102
chrI	9009896	9010116	gesPSI:0.33101408	950	-	9009896	9010116	0	2	50,50	0,170
chrI	9009887	9010116	gesPSI:0.66898592	950	-	9009887	9010116	0	2	50,50	0,179
chrIII	9039326	9039508	gesPSI:0.07679000	950	-	9039326	9039508	0	2	50,50	0,132
chrIII	9039318	9039508	gesPSI:0.92321000	950	-	9039318	9039508	0	2	50,50	0,140
chrIII	9052321	9052471	gesPSI:0.67287392	950	-	9052321	9052471	0	2	50,50	0,100
chrIII	9052327	9052471	gesPSI:0.32712608	950	-	9052327	9052471	0	2	50,50	0,94
chrIII	9058171	9058322	gesPSI:0.52528691	950	+	9058171	9058322	0	2	50,50	0,101
chrIII	9058171	9058313	gesPSI:0.47471309	950	+	9058171	9058313	0	2	50,50	0,92
chrIV	9086618	9087328	gesPSI:0.53746577	950	+	9086618	9087328	0	2	50,50	0,660
chrIV	9086618	9087370	gesPSI:0.46253423	950	+	9086618	9087370	0	2	50,50	0,702
chrI	9102847	9103096	gesPSI:0.76553820	950	-	9102847	9103096	0	2	50,50	0,199
chrI	9102847	9103048	gesPSI:0.23446180	950	-	9102847	9103048	0	2	50,50	0,151
chrI	9134388	9135036	gesPSI:0.75225380	950	+	9134388	9135036	0	2	50,50	0,598
chrI	9134388	9135024	gesPSI:0.24774620	950	+	9134388	9135024	0	2	50,50	0,586
chrIV	9145385	9145570	gesPSI:0.56869363	950	+	9145385	9145570	0	2	50,50	0,135
chrIV	9145385	9145537	gesPSI:0.43130637	950	+	9145385	9145537	0	2	50,50	0,102
chrIV	9340953	9341403	gesPSI:0.59796629	950	-	9340953	9341403	0	2	50,50	0,400
chrIV	9340959	9341403	gesPSI:0.40203371	950	-	9340959	9341403	0	2	50,50	0,394
chrX	9344256	9344415	gesPSI:0.77991196	950	-	9344256	9344415	0	2	50,50	0,109
chrX	9344256	9344409	gesPSI:0.22008804	950	-	9344256	9344409	0	2	50,50	0,103
chrIII	9384314	9384456	gesPSI:0.50817700	950	-	9384314	9384456	0	2	50,50	0,92
chrIII	9384305	9384456	gesPSI:0.49182300	950	-	9384305	9384456	0	2	50,50	0,101
chrIII	9491679	9491940	gesPSI:0.90120985	950	+	9491679	9491940	0	2	50,50	0,211
chrIII	9491679	9492189	gesPSI:0.09879015	950	+	9491679	9492189	0	2	50,50	0,460
chrIII	9562632	9562780	gesPSI:0.74688799	950	-	9562632	9562780	0	2	50,50	0,98
chrIII	9562632	9562784	gesPSI:0.25311201	950	-	9562632	9562784	0	2	50,50	0,102
chrIII	9562958	9563185	gesPSI:0.05819008	950	-	9562958	9563185	0	2	50,50	0,177
chrIII	9562958	9563200	gesPSI:0.94180992	950	-	9562958	9563200	0	2	50,50	0,192
chrX	9563264	9563413	gesPSI:0.65519042	950	-	9563264	9563413	0	2	50,50	0,99
chrX	9563271	9563413	gesPSI:0.34480958	950	-	9563271	9563413	0	2	50,50	0,92
chrI	9621233	9621384	gesPSI:0.86299342	950	+	9621233	9621384	0	2	50,50	0,101
chrI	9621233	9621375	gesPSI:0.13700658	950	+	9621233	9621375	0	2	50,50	0,92
chrIII	9623726	9623885	gesPSI:0.13857590	950	+	9623726	9623885	0	2	50,50	0,109
chrIII	9623726	9623879	gesPSI:0.86142410	950	+	9623726	9623879	0	2	50,50	0,103
chrIV	9651934	9652208	gesPSI:0.88278248	950	+	9651934	9652208	0	2	50,50	0,224
chrIV	9651976	9652208	gesPSI:0.11721752	950	+	9651976	9652208	0	2	50,50	0,182
chrII	9670996	9671299	gesPSI:0.48452595	950	+	9670996	9671299	0	2	50,50	0,253
chrII	9670996	9671305	gesPSI:0.51547405	950	+	9670996	9671305	0	2	50,50	0,259
chrIII	9691315	9691713	gesPSI:0.05873911	950	-	9691315	9691713	0	2	50,50	0,348
chrIII	9691315	9691751	gesPSI:0.94126089	950	-	9691315	9691751	0	2	50,50	0,386
chrI	9724902	9725048	gesPSI:0.89652015	950	+	9724902	9725048	0	2	50,50	0,96
chrI	9724864	9725016	gesPSI:0.10347985	950	+	9724864	9725016	0	2	50,50	0,102
chrIV	9732850	9732996	gesPSI:0.18358240	950	-	9732850	9732996	0	2	50,50	0,96
chrIV	9732841	9732996	gesPSI:0.81641760	950	-	9732841	9732996	0	2	50,50	0,105
chrII	9749753	9749898	gesPSI:0.64699064	950	+	9749753	9749898	0	2	50,50	0,95
chrII	9749753	9749905	gesPSI:0.35300936	950	+	9749753	9749905	0	2	50,50	0,102
chrIII	9773108	9773467	gesPSI:0.54903222	950	+	9773108	9773467	0	2	50,50	0,309
chrIII	9773108	9773380	gesPSI:0.45096778	950	+	9773108	9773380	0	2	50,50	0,222
chrV	9776274	9776712	gesPSI:0.47379140	950	-	9776274	9776712	0	2	50,50	0,388
chrV	9776267	9776712	gesPSI:0.52620860	950	-	9776267	9776712	0	2	50,50	0,395
chrV	9781150	9781473	gesPSI:0.31073415	950	-	9781150	9781473	0	2	50,50	0,273
chrV	9781276	9781473	gesPSI:0.68926585	950	-	9781276	9781473	0	2	50,50	0,147
chrI	9781468	9781613	gesPSI:0.59791469	950	-	9781468	9781613	0	2	50,50	0,95
chrI	9781459	9781613	gesPSI:0.40208531	950	-	9781459	9781613	0	2	50,50	0,104
chrV	9850330	9850479	gesPSI:0.73851387	950	-	9850330	9850479	0	2	50,50	0,99
chrV	9850337	9850479	gesPSI:0.26148613	950	-	9850337	9850479	0	2	50,50	0,92
chrI	9872999	9873148	gesPSI:0.70902256	950	+	9872999	9873148	0	2	50,50	0,99
chrI	9872996	9873148	gesPSI:0.29097744	950	+	9872996	9873148	0	2	50,50	0,102
chrI	9880156	9880311	gesPSI:0.64658311	950	-	9880156	9880311	0	2	50,50	0,105
chrI	9880165	9880311	gesPSI:0.35341689	950	-	9880165	9880311	0	2	50,50	0,96
chrV	9893825	9893992	gesPSI:0.78817851	950	+	9893825	9893992	0	2	50,50	0,117
chrV	9893834	9893992	gesPSI:0.21182149	950	+	9893834	9893992	0	2	50,50	0,108
chrI	9901756	9902050	gesPSI:0.23009931	950	+	9901756	9902050	0	2	50,50	0,244
chrI	9901714	9902050	gesPSI:0.76990069	950	+	9901714	9902050	0	2	50,50	0,286
chrX	9926974	9927118	gesPSI:0.39434423	950	-	9926974	9927118	0	2	50,50	0,94
chrX	9926964	9927118	gesPSI:0.60565577	950	-	9926964	9927118	0	2	50,50	0,104
chrII	9930281	9930497	gesPSI:0.67551641	950	+	9930281	9930497	0	2	50,50	0,166
chrII	9930281	9930503	gesPSI:0.32448359	950	+	9930281	9930503	0	2	50,50	0,172
chrX	9946124	9946587	gesPSI:0.42202046	950	-	9946124	9946587	0	2	50,50	0,413
chrX	9946124	9946347	gesPSI:0.57797954	950	-	9946124	9946347	0	2	50,50	0,173
chrX	9993239	9993680	gesPSI:0.42531100	950	-	9993239	9993680	0	2	50,50	0,391
chrX	9993171	9993680	gesPSI:0.57468900	950	-	9993171	9993680	0	2	50,50	0,459
chrI	10020373	10020522	gesPSI:0.65997775	950	+	10020373	10020522	0	2	50,50	0,99
chrI	10020373	10020515	gesPSI:0.34002225	950	+	10020373	10020515	0	2	50,50	0,92
chrX	10056030	10056243	gesPSI:0.25825450	950	+	10056030	10056243	0	2	50,50	0,163
chrX	10056030	10056238	gesPSI:0.74174550	950	+	10056030	10056238	0	2	50,50	0,158
chrIII	10114316	10114457	gesPSI:0.76712884	950	-	10114316	10114457	0	2	50,50	0,91
chrIII	10114316	10114462	gesPSI:0.23287116	950	-	10114316	10114462	0	2	50,50	0,96
chrV	10160598	10160926	gesPSI:0.49140829	950	-	10160598	10160926	0	2	50,50	0,278
chrV	10160598	10160931	gesPSI:0.50859171	950	-	10160598	10160931	0	2	50,50	0,283
chrI	10187167	10187321	gesPSI:0.41171957	950	+	10187167	10187321	0	2	50,50	0,104
chrI	10187167	10187309	gesPSI:0.58828043	950	+	10187167	10187309	0	2	50,50	0,92
chrI	10192063	10192220	gesPSI:0.55972397	950	-	10192063	10192220	0	2	50,50	0,107
chrI	10192078	10192220	gesPSI:0.44027603	950	-	10192078	10192220	0	2	50,50	0,92
chrX	10199552	10199855	gesPSI:0.55389982	950	+	10199552	10199855	0	2	50,50	0,253
chrX	10199552	10199813	gesPSI:0.44610018	950	+	10199552	10199813	0	2	50,50	0,211
chrIV	10220557	10220699	gesPSI:0.12728541	950	-	10220557	10220699	0	2	50,50	0,92
chrIV	10220551	10220699	gesPSI:0.87271459	950	-	10220551	10220699	0	2	50,50	0,98
chrIII	10253620	10254486	gesPSI:0.40911350	950	+	10253620	10254486	0	2	50,50	0,816
chrIII	10253614	10254486	gesPSI:0.59088650	950	+	10253614	10254486	0	2	50,50	0,822
chrV	10257364	10257507	gesPSI:0.88389328	950	+	10257364	10257507	0	2	50,50	0,93
chrV	10257361	10257507	gesPSI:0.11610672	950	+	10257361	10257507	0	2	50,50	0,96
chrII	10266136	10266702	gesPSI:0.64098333	950	+	10266136	10266702	0	2	50,50	0,516
chrII	10266136	10266696	gesPSI:0.35901667	950	+	10266136	10266696	0	2	50,50	0,510
chrI	10344461	10344619	gesPSI:0.83318079	950	+	10344461	10344619	0	2	50,50	0,108
chrI	10344461	10344613	gesPSI:0.16681921	950	+	10344461	10344613	0	2	50,50	0,102
chrIII	10354215	10354362	gesPSI:0.88158290	950	+	10354215	10354362	0	2	50,50	0,97
chrIII	10354215	10354356	gesPSI:0.11841710	950	+	10354215	10354356	0	2	50,50	0,91
chrII	10386649	10386805	gesPSI:0.27020752	950	+	10386649	10386805	0	2	50,50	0,106
chrII	10386649	10386793	gesPSI:0.72979248	950	+	10386649	10386793	0	2	50,50	0,94
chrX	10400210	10400526	gesPSI:0.59487179	950	+	10400210	10400526	0	2	50,50	0,266
chrX	10400192	10400526	gesPSI:0.40512821	950	+	10400192	10400526	0	2	50,50	0,284
chrIII	10418257	10418850	gesPSI:0.47099039	950	+	10418257	10418850	0	2	50,50	0,543
chrIII	10418257	10418868	gesPSI:0.52900961	950	+	10418257	10418868	0	2	50,50	0,561
chrIII	10438365	10438876	gesPSI:0.51525136	950	-	10438365	10438876	0	2	50,50	0,461
chrIII	10438371	10438876	gesPSI:0.48474864	950	-	10438371	10438876	0	2	50,50	0,455
chrIII	10467204	10467353	gesPSI:0.26641404	950	+	10467204	10467353	0	2	50,50	0,99
chrIII	10467204	10467361	gesPSI:0.73358596	950	+	10467204	10467361	0	2	50,50	0,107
chrI	10476679	10476828	gesPSI:0.42627401	950	-	10476679	10476828	0	2	50,50	0,99
chrI	10476685	10476828	gesPSI:0.57372599	950	-	10476685	10476828	0	2	50,50	0,93
chrX	10482891	10483149	gesPSI:0.82320319	950	+	10482891	10483149	0	2	50,50	0,208
chrX	10482933	10483149	gesPSI:0.17679681	950	+	10482933	10483149	0	2	50,50	0,166
chrI	10581777	10582466	gesPSI:0.86549783	950	-	10581777	10582466	0	2	50,50	0,639
chrI	10581786	10582466	gesPSI:0.13450217	950	-	10581786	10582466	0	2	50,50	0,630
chrIII	10597076	10598096	gesPSI:0.76216008	950	-	10597076	10598096	0	2	50,50	0,970
chrIII	10597082	10598096	gesPSI:0.23783992	950	-	10597082	10598096	0	2	50,50	0,964
chrV	10645149	10645293	gesPSI:0.61537300	950	-	10645149	10645293	0	2	50,50	0,94
chrV	10645142	10645293	gesPSI:0.38462700	950	-	10645142	10645293	0	2	50,50	0,101
chrII	10740388	10741174	gesPSI:0.47705426	950	-	10740388	10741174	0	2	50,50	0,736
chrII	10740388	10741186	gesPSI:0.52294574	950	-	10740388	10741186	0	2	50,50	0,748
chrIII	10752504	10753009	gesPSI:0.30053155	950	-	10752504	10753009	0	2	50,50	0,455
chrIII	10752498	10753009	gesPSI:0.69946845	950	-	10752498	10753009	0	2	50,50	0,461
chrIII	10757386	10757538	gesPSI:0.14661003	950	-	10757386	10757538	0	2	50,50	0,102
chrIII	10757386	10757549	gesPSI:0.85338997	950	-	10757386	10757549	0	2	50,50	0,113
chrII	10779042	10779530	gesPSI:0.85783697	950	-	10779042	10779530	0	2	50,50	0,438
chrII	10779051	10779530	gesPSI:0.14216303	950	-	10779051	10779530	0	2	50,50	0,429
chrII	10779764	10779958	gesPSI:0.42468804	950	-	10779764	10779958	0	2	50,50	0,144
chrII	10779764	10779982	gesPSI:0.57531196	950	-	10779764	10779982	0	2	50,50	0,168
chrX	10796605	10796988	gesPSI:0.14196460	950	-	10796605	10796988	0	2	50,50	0,333
chrX	10796605	10797033	gesPSI:0.85803540	950	-	10796605	10797033	0	2	50,50	0,378
chrII	10796924	10797067	gesPSI:0.43661714	950	-	10796924	10797067	0	2	50,50	0,93
chrII	10796915	10797067	gesPSI:0.56338286	950	-	10796915	10797067	0	2	50,50	0,102
chrX	10797257	10797417	gesPSI:0.66364920	950	-	10797257	10797417	0	2	50,50	0,110
chrX	10797257	10797411	gesPSI:0.33635080	950	-	10797257	10797411	0	2	50,50	0,104
chrII	10868386	10868692	gesPSI:0.79146141	950	-	10868386	10868692	0	2	50,50	0,256
chrII	10868392	10868692	gesPSI:0.20853859	950	-	10868392	10868692	0	2	50,50	0,250
chrV	10899382	10899677	gesPSI:0.51215917	950	+	10899382	10899677	0	2	50,50	0,245
chrV	10899382	10899683	gesPSI:0.48784083	950	+	10899382	10899683	0	2	50,50	0,251
chrII	10933094	10933520	gesPSI:0.57841530	950	-	10933094	10933520	0	2	50,50	0,376
chrII	10933094	10933487	gesPSI:0.42158470	950	-	10933094	10933487	0	2	50,50	0,343
chrI	10934186	10934950	gesPSI:0.59978927	950	-	10934186	10934950	0	2	50,50	0,714
chrI	10934189	10934950	gesPSI:0.40021073	950	-	10934189	10934950	0	2	50,50	0,711
chrI	10941253	10941623	gesPSI:0.35760870	950	+	10941253	10941623	0	2	50,50	0,320
chrI	10941253	10941632	gesPSI:0.64239130	950	+	10941253	10941632	0	2	50,50	0,329
chrIII	10943099	10945688	gesPSI:0.75141612	950	+	10943099	10945688	0	2	50,50	0,2539
chrIII	10943039	10945688	gesPSI:0.24858388	950	+	10943039	10945688	0	2	50,50	0,2599
chrV	10959877	10960025	gesPSI:0.84009094	950	-	10959877	10960025	0	2	50,50	0,98
chrV	10959877	10960027	gesPSI:0.15990906	950	-	10959877	10960027	0	2	50,50	0,100
chrII	11095447	11095600	gesPSI:0.55085843	950	-	11095447	11095600	0	2	50,50	0,103
chrII	11095456	11095600	gesPSI:0.44914157	950	-	11095456	11095600	0	2	50,50	0,94
chrII	11105659	11105800	gesPSI:0.24484053	950	+	11105659	11105800	0	2	50,50	0,91
chrII	11105659	11105807	gesPSI:0.75515947	950	+	11105659	11105807	0	2	50,50	0,98
chrV	11117794	11117941	gesPSI:0.75942061	950	+	11117794	11117941	0	2	50,50	0,97
chrV	11117794	11117935	gesPSI:0.24057939	950	+	11117794	11117935	0	2	50,50	0,91
chrIV	11145254	11145451	gesPSI:0.45045519	950	+	11145254	11145451	0	2	50,50	0,147
chrIV	11145254	11145460	gesPSI:0.54954481	950	+	11145254	11145460	0	2	50,50	0,156
chrII	11300163	11300413	gesPSI:0.51464634	950	+	11300163	11300413	0	2	50,50	0,200
chrII	11299986	11300413	gesPSI:0.48535366	950	+	11299986	11300413	0	2	50,50	0,377
chrX	11320509	11320912	gesPSI:0.25209877	950	+	11320509	11320912	0	2	50,50	0,353
chrX	11320505	11320912	gesPSI:0.74790123	950	+	11320505	11320912	0	2	50,50	0,357
chrII	11349223	11349368	gesPSI:0.26069411	950	+	11349223	11349368	0	2	50,50	0,95
chrII	11349223	11349374	gesPSI:0.73930589	950	+	11349223	11349374	0	2	50,50	0,101
chrI	11361445	11362582	gesPSI:0.53496503	950	-	11361445	11362582	0	2	50,50	0,1087
chrI	11361786	11362582	gesPSI:0.46503497	950	-	11361786	11362582	0	2	50,50	0,746
chrIII	11388735	11389334	gesPSI:0.73925588	950	-	11388735	11389334	0	2	50,50	0,549
chrIII	11388735	11389444	gesPSI:0.26074412	950	-	11388735	11389444	0	2	50,50	0,659
chrX	11453438	11453586	gesPSI:0.28336489	950	-	11453438	11453586	0	2	50,50	0,98
chrX	11453444	11453586	gesPSI:0.71663511	950	-	11453444	11453586	0	2	50,50	0,92
chrI	11456928	11458889	gesPSI:0.13072546	950	-	11456928	11458889	0	2	50,50	0,1911
chrI	11456953	11458889	gesPSI:0.86927454	950	-	11456953	11458889	0	2	50,50	0,1886
chrII	11462016	11462447	gesPSI:0.89252973	950	-	11462016	11462447	0	2	50,50	0,381
chrII	11462016	11462473	gesPSI:0.10747027	950	-	11462016	11462473	0	2	50,50	0,407
chrII	11471713	11472007	gesPSI:0.82863843	950	-	11471713	11472007	0	2	50,50	0,244
chrII	11471719	11472007	gesPSI:0.17136157	950	-	11471719	11472007	0	2	50,50	0,238
chrIII	11524824	11526344	gesPSI:0.48240418	950	+	11524824	11526344	0	2	50,50	0,1470
chrIII	11524824	11526353	gesPSI:0.51759582	950	+	11524824	11526353	0	2	50,50	0,1479
chrII	11534180	11534340	gesPSI:0.87515877	950	-	11534180	11534340	0	2	50,50	0,110
chrII	11534190	11534340	gesPSI:0.12484123	950	-	11534190	11534340	0	2	50,50	0,100
chrX	11546326	11546478	gesPSI:0.34475696	950	-	11546326	11546478	0	2	50,50	0,102
chrX	11546335	11546478	gesPSI:0.65524304	950	-	11546335	11546478	0	2	50,50	0,93
chrV	11571907	11572049	gesPSI:0.05096211	950	+	11571907	11572049	0	2	50,50	0,92
chrV	11571907	11572056	gesPSI:0.94903789	950	+	11571907	11572056	0	2	50,50	0,99
chrI	11572474	11573313	gesPSI:0.91212670	950	-	11572474	11573313	0	2	50,50	0,789
chrI	11572481	11573313	gesPSI:0.08787330	950	-	11572481	11573313	0	2	50,50	0,782
chrV	11734129	11734486	gesPSI:0.69209877	950	-	11734129	11734486	0	2	50,50	0,307
chrV	11734129	11734570	gesPSI:0.30790123	950	-	11734129	11734570	0	2	50,50	0,391
chrI	11742341	11742491	gesPSI:0.23607719	950	-	11742341	11742491	0	2	50,50	0,100
chrI	11742335	11742491	gesPSI:0.76392281	950	-	11742335	11742491	0	2	50,50	0,106
chrIV	11757518	11757668	gesPSI:0.55093274	950	-	11757518	11757668	0	2	50,50	0,100
chrIV	11757512	11757668	gesPSI:0.44906726	950	-	11757512	11757668	0	2	50,50	0,106
chrV	11781269	11781470	gesPSI:0.80680202	950	+	11781269	11781470	0	2	50,50	0,151
chrV	11781269	11781464	gesPSI:0.19319798	950	+	11781269	11781464	0	2	50,50	0,145
chrII	11847798	11848031	gesPSI:0.44472259	950	-	11847798	11848031	0	2	50,50	0,183
chrII	11847786	11848031	gesPSI:0.55527741	950	-	11847786	11848031	0	2	50,50	0,195
chrII	11919575	11919727	gesPSI:0.66335001	950	-	11919575	11919727	0	2	50,50	0,102
chrII	11919587	11919727	gesPSI:0.33664999	950	-	11919587	11919727	0	2	50,50	0,90
chrV	11964340	11964761	gesPSI:0.68687974	950	-	11964340	11964761	0	2	50,50	0,371
chrV	11964346	11964761	gesPSI:0.31312026	950	-	11964346	11964761	0	2	50,50	0,365
chrII	11972492	11972639	gesPSI:0.18936318	950	-	11972492	11972639	0	2	50,50	0,97
chrII	11972492	11972645	gesPSI:0.81063682	950	-	11972492	11972645	0	2	50,50	0,103
chrII	12025963	12026314	gesPSI:0.15913025	950	-	12025963	12026314	0	2	50,50	0,301
chrII	12025963	12026181	gesPSI:0.84086975	950	-	12025963	12026181	0	2	50,50	0,168
chrV	12057435	12057585	gesPSI:0.48736383	950	-	12057435	12057585	0	2	50,50	0,100
chrV	12057429	12057576	gesPSI:0.51263617	950	-	12057429	12057576	0	2	50,50	0,97
chrIV	12104729	12104972	gesPSI:0.16421808	950	+	12104729	12104972	0	2	50,50	0,193
chrIV	12104729	12104966	gesPSI:0.83578192	950	+	12104729	12104966	0	2	50,50	0,187
chrIV	12139097	12139256	gesPSI:0.84918555	950	-	12139097	12139256	0	2	50,50	0,109
chrIV	12139103	12139256	gesPSI:0.15081445	950	-	12139103	12139256	0	2	50,50	0,103
chrII	12209780	12210862	gesPSI:0.74418290	950	-	12209780	12210862	0	2	50,50	0,1032
chrII	12209789	12210862	gesPSI:0.25581710	950	-	12209789	12210862	0	2	50,50	0,1023
chrIV	12270248	12270402	gesPSI:0.20937500	950	-	12270248	12270402	0	2	50,50	0,104
chrIV	12270254	12270402	gesPSI:0.79062500	950	-	12270254	12270402	0	2	50,50	0,98
chrIV	12431259	12431653	gesPSI:0.86859112	950	+	12431259	12431653	0	2	50,50	0,344
chrIV	12431131	12431653	gesPSI:0.13140888	950	+	12431131	12431653	0	2	50,50	0,472
chrIV	12458259	12458521	gesPSI:0.47784039	950	+	12458259	12458521	0	2	50,50	0,212
chrIV	12458372	12458521	gesPSI:0.52215961	950	+	12458372	12458521	0	2	50,50	0,99
chrI	12488032	12488918	gesPSI:0.07611434	950	+	12488032	12488918	0	2	50,50	0,836
chrI	12488028	12488918	gesPSI:0.92388566	950	+	12488028	12488918	0	2	50,50	0,840
chrX	12506964	12507120	gesPSI:0.69959088	950	-	12506964	12507120	0	2	50,50	0,106
chrX	12506916	12507120	gesPSI:0.30040912	950	-	12506916	12507120	0	2	50,50	0,154
chrV	12541938	12542325	gesPSI:0.46101974	950	+	12541938	12542325	0	2	50,50	0,337
chrV	12541930	12542325	gesPSI:0.53898026	950	+	12541930	12542325	0	2	50,50	0,345
chrII	12556526	12556674	gesPSI:0.14053453	950	+	12556526	12556674	0	2	50,50	0,98
chrII	12556528	12556674	gesPSI:0.85946547	950	+	12556528	12556674	0	2	50,50	0,96
chrIV	12585309	12585466	gesPSI:0.16132242	950	-	12585309	12585466	0	2	50,50	0,107
chrIV	12585309	12585451	gesPSI:0.83867758	950	-	12585309	12585451	0	2	50,50	0,92
chrI	12598325	12598492	gesPSI:0.71318342	950	-	12598325	12598492	0	2	50,50	0,117
chrI	12598325	12598487	gesPSI:0.28681658	950	-	12598325	12598487	0	2	50,50	0,112
chrIII	12600490	12600939	gesPSI:0.80810060	950	-	12600490	12600939	0	2	50,50	0,399
chrIII	12600490	12600935	gesPSI:0.19189940	950	-	12600490	12600935	0	2	50,50	0,395
chrV	12707097	12707238	gesPSI:0.74601883	950	+	12707097	12707238	0	2	50,50	0,91
chrV	12707097	12707247	gesPSI:0.25398117	950	+	12707097	12707247	0	2	50,50	0,100
chrII	12893281	12893433	gesPSI:0.21449427	950	-	12893281	12893433	0	2	50,50	0,102
chrII	12893287	12893433	gesPSI:0.78550573	950	-	12893287	12893433	0	2	50,50	0,96
chrIV	12907762	12907906	gesPSI:0.55818248	950	-	12907762	12907906	0	2	50,50	0,94
chrIV	12907660	12907906	gesPSI:0.44181752	950	-	12907660	12907906	0	2	50,50	0,196
chrI	12975270	12975449	gesPSI:0.41319481	950	+	12975270	12975449	0	2	50,50	0,129
chrI	12975270	12975455	gesPSI:0.58680519	950	+	12975270	12975455	0	2	50,50	0,135
chrX	12989617	12989764	gesPSI:0.62450593	950	+	12989617	12989764	0	2	50,50	0,97
chrX	12989617	12989770	gesPSI:0.37549407	950	+	12989617	12989770	0	2	50,50	0,103
chrV	13007237	13007381	gesPSI:0.66449268	950	-	13007237	13007381	0	2	50,50	0,94
chrV	13007237	13007387	gesPSI:0.33550732	950	-	13007237	13007387	0	2	50,50	0,100
chrIV	13082386	13082538	gesPSI:0.81681939	950	+	13082386	13082538	0	2	50,50	0,102
chrIV	13082386	13082532	gesPSI:0.18318061	950	+	13082386	13082532	0	2	50,50	0,96
chrII	13090097	13090238	gesPSI:0.18410211	950	+	13090097	13090238	0	2	50,50	0,91
chrII	13090097	13090247	gesPSI:0.81589789	950	+	13090097	13090247	0	2	50,50	0,100
chrII	13108328	13108472	gesPSI:0.61441441	950	+	13108328	13108472	0	2	50,50	0,94
chrII	13108328	13108478	gesPSI:0.38558559	950	+	13108328	13108478	0	2	50,50	0,100
chrIV	13139056	13141592	gesPSI:0.23571429	950	-	13139056	13141592	0	2	50,50	0,2486
chrIV	13139056	13141446	gesPSI:0.76428571	950	-	13139056	13141446	0	2	50,50	0,2340
chrIV	13150731	13152035	gesPSI:0.72759482	950	-	13150731	13152035	0	2	50,50	0,1254
chrIV	13151057	13152035	gesPSI:0.27240518	950	-	13151057	13152035	0	2	50,50	0,928
chrIV	13238836	13239200	gesPSI:0.60421888	950	-	13238836	13239200	0	2	50,50	0,314
chrIV	13238832	13239200	gesPSI:0.39578112	950	-	13238832	13239200	0	2	50,50	0,318
chrII	13281457	13282621	gesPSI:0.82250174	950	-	13281457	13282621	0	2	50,50	0,1114
chrII	13281463	13282621	gesPSI:0.17749826	950	-	13281463	13282621	0	2	50,50	0,1108
chrI	13282357	13282503	gesPSI:0.25956511	950	-	13282357	13282503	0	2	50,50	0,96
chrI	13282351	13282503	gesPSI:0.74043489	950	-	13282351	13282503	0	2	50,50	0,102
chrI	13282643	13283823	gesPSI:0.10480734	950	-	13282643	13283823	0	2	50,50	0,1130
chrI	13282649	13283823	gesPSI:0.89519266	950	-	13282649	13283823	0	2	50,50	0,1124
chrIV	13298565	13298775	gesPSI:0.42110806	950	+	13298565	13298775	0	2	50,50	0,160
chrIV	13298502	13298775	gesPSI:0.57889194	950	+	13298502	13298775	0	2	50,50	0,223
chrV	13306841	13306996	gesPSI:0.54731282	950	+	13306841	13306996	0	2	50,50	0,105
chrV	13306815	13306996	gesPSI:0.45268718	950	+	13306815	13306996	0	2	50,50	0,131
chrI	13311634	13311851	gesPSI:0.38458111	950	-	13311634	13311851	0	2	50,50	0,167
chrI	13311628	13311851	gesPSI:0.61541889	950	-	13311628	13311851	0	2	50,50	0,173
chrX	13329340	13329483	gesPSI:0.67694358	950	+	13329340	13329483	0	2	50,50	0,93
chrX	13329340	13329489	gesPSI:0.32305642	950	+	13329340	13329489	0	2	50,50	0,99
chrV	13359456	13359608	gesPSI:0.63451479	950	+	13359456	13359608	0	2	50,50	0,102
chrV	13359456	13359599	gesPSI:0.36548521	950	+	13359456	13359599	0	2	50,50	0,93
chrV	13387593	13387734	gesPSI:0.30662517	950	-	13387593	13387734	0	2	50,50	0,91
chrV	13387593	13387743	gesPSI:0.69337483	950	-	13387593	13387743	0	2	50,50	0,100
chrII	13387515	13388528	gesPSI:0.55736434	950	+	13387515	13388528	0	2	50,50	0,963
chrII	13387515	13388517	gesPSI:0.44263566	950	+	13387515	13388517	0	2	50,50	0,952
chrIV	13390925	13392390	gesPSI:0.09381670	950	-	13390925	13392390	0	2	50,50	0,1415
chrIV	13390925	13392396	gesPSI:0.90618330	950	-	13390925	13392396	0	2	50,50	0,1421
chrX	13400955	13401420	gesPSI:0.74568448	950	-	13400955	13401420	0	2	50,50	0,415
chrX	13400955	13401253	gesPSI:0.25431552	950	-	13400955	13401253	0	2	50,50	0,248
chrII	13424632	13425025	gesPSI:0.78021978	950	+	13424632	13425025	0	2	50,50	0,343
chrII	13424632	13425016	gesPSI:0.21978022	950	+	13424632	13425016	0	2	50,50	0,334
chrII	13454920	13455086	gesPSI:0.91544021	950	-	13454920	13455086	0	2	50,50	0,116
chrII	13454929	13455086	gesPSI:0.08455979	950	-	13454929	13455086	0	2	50,50	0,107
chrIV	13478513	13479705	gesPSI:0.15174884	950	-	13478513	13479705	0	2	50,50	0,1142
chrIV	13478513	13479699	gesPSI:0.84825116	950	-	13478513	13479699	0	2	50,50	0,1136
chrV	13532120	13532288	gesPSI:0.18610747	950	-	13532120	13532288	0	2	50,50	0,118
chrV	13532132	13532288	gesPSI:0.81389253	950	-	13532132	13532288	0	2	50,50	0,106
chrV	13561689	13561842	gesPSI:0.72984118	950	+	13561689	13561842	0	2	50,50	0,103
chrV	13561689	13561847	gesPSI:0.27015882	950	+	13561689	13561847	0	2	50,50	0,108
chrII	13587666	13588658	gesPSI:0.91763664	950	+	13587666	13588658	0	2	50,50	0,942
chrII	13587666	13588635	gesPSI:0.08236336	950	+	13587666	13588635	0	2	50,50	0,919
chrIII	13624716	13625830	gesPSI:0.91842043	950	+	13624716	13625830	0	2	50,50	0,1064
chrIII	13624716	13625823	gesPSI:0.08157957	950	+	13624716	13625823	0	2	50,50	0,1057
chrX	13625685	13625837	gesPSI:0.46250000	950	-	13625685	13625837	0	2	50,50	0,102
chrX	13625694	13625837	gesPSI:0.53750000	950	-	13625694	13625837	0	2	50,50	0,93
chrV	13663676	13663921	gesPSI:0.27703847	950	+	13663676	13663921	0	2	50,50	0,195
chrV	13663718	13663921	gesPSI:0.72296153	950	+	13663718	13663921	0	2	50,50	0,153
chrI	13683863	13684011	gesPSI:0.91599094	950	+	13683863	13684011	0	2	50,50	0,98
chrI	13683863	13684026	gesPSI:0.08400906	950	+	13683863	13684026	0	2	50,50	0,113
chrIII	13691065	13691665	gesPSI:0.70011905	950	+	13691065	13691665	0	2	50,50	0,550
chrIII	13691065	13691659	gesPSI:0.29988095	950	+	13691065	13691659	0	2	50,50	0,544
chrIII	13728897	13729073	gesPSI:0.69286210	950	-	13728897	13729073	0	2	50,50	0,126
chrIII	13728885	13729073	gesPSI:0.30713790	950	-	13728885	13729073	0	2	50,50	0,138
chrX	13749848	13750098	gesPSI:0.15614035	950	+	13749848	13750098	0	2	50,50	0,200
chrX	13749848	13750107	gesPSI:0.84385965	950	+	13749848	13750107	0	2	50,50	0,209
chrIII	13759191	13759340	gesPSI:0.86429739	950	+	13759191	13759340	0	2	50,50	0,99
chrIII	13759191	13759334	gesPSI:0.13570261	950	+	13759191	13759334	0	2	50,50	0,93
chrIII	13780525	13780672	gesPSI:0.38842872	950	+	13780525	13780672	0	2	50,50	0,97
chrIII	13780513	13780672	gesPSI:0.61157128	950	+	13780513	13780672	0	2	50,50	0,109
chrV	13785572	13785712	gesPSI:0.17530672	950	-	13785572	13785712	0	2	50,50	0,90
chrV	13785563	13785712	gesPSI:0.82469328	950	-	13785563	13785712	0	2	50,50	0,99
chrX	13867246	13868081	gesPSI:0.44114707	950	-	13867246	13868081	0	2	50,50	0,785
chrX	13867246	13867955	gesPSI:0.55885293	950	-	13867246	13867955	0	2	50,50	0,659
chrII	13971012	13971372	gesPSI:0.60242015	950	-	13971012	13971372	0	2	50,50	0,310
chrII	13970743	13971372	gesPSI:0.39757985	950	-	13970743	13971372	0	2	50,50	0,579
chrX	14004270	14004415	gesPSI:0.40382483	950	-	14004270	14004415	0	2	50,50	0,95
chrX	14004273	14004415	gesPSI:0.59617517	950	-	14004273	14004415	0	2	50,50	0,92
chrV	14035938	14036094	gesPSI:0.72096438	950	-	14035938	14036094	0	2	50,50	0,106
chrV	14035947	14036094	gesPSI:0.27903562	950	-	14035947	14036094	0	2	50,50	0,97
chrV	14101802	14101959	gesPSI:0.31030398	950	+	14101802	14101959	0	2	50,50	0,107
chrV	14101811	14101959	gesPSI:0.68969602	950	+	14101811	14101959	0	2	50,50	0,98
chrV	14190071	14190223	gesPSI:0.57523479	950	+	14190071	14190223	0	2	50,50	0,102
chrV	14190071	14190211	gesPSI:0.42476521	950	+	14190071	14190211	0	2	50,50	0,90
chrV	14196236	14196382	gesPSI:0.36805556	950	+	14196236	14196382	0	2	50,50	0,96
chrV	14196236	14196388	gesPSI:0.63194444	950	+	14196236	14196388	0	2	50,50	0,102
chrII	14343781	14344330	gesPSI:0.14508274	950	-	14343781	14344330	0	2	50,50	0,499
chrII	14343784	14344330	gesPSI:0.85491726	950	-	14343784	14344330	0	2	50,50	0,496
chrII	14400701	14400841	gesPSI:0.18282630	950	+	14400701	14400841	0	2	50,50	0,90
chrII	14400701	14400847	gesPSI:0.81717370	950	+	14400701	14400847	0	2	50,50	0,96
chrII	14403104	14403575	gesPSI:0.32933437	950	+	14403104	14403575	0	2	50,50	0,421
chrII	14403104	14403584	gesPSI:0.67066563	950	+	14403104	14403584	0	2	50,50	0,430
chrI	14437179	14438396	gesPSI:0.80749806	950	-	14437179	14438396	0	2	50,50	0,1167
chrI	14437179	14438560	gesPSI:0.19250194	950	-	14437179	14438560	0	2	50,50	0,1331
chrV	14459367	14459515	gesPSI:0.74600163	950	+	14459367	14459515	0	2	50,50	0,98
chrV	14459373	14459515	gesPSI:0.25399837	950	+	14459373	14459515	0	2	50,50	0,92
chrI	14498002	14498144	gesPSI:0.36564682	950	-	14498002	14498144	0	2	50,50	0,92
chrI	14497994	14498144	gesPSI:0.63435318	950	-	14497994	14498144	0	2	50,50	0,100
chrIV	14657140	14657307	gesPSI:0.58561231	950	+	14657140	14657307	0	2	50,50	0,117
chrIV	14657140	14657295	gesPSI:0.41438769	950	+	14657140	14657295	0	2	50,50	0,105
chrX	14704290	14704716	gesPSI:0.05547172	950	-	14704290	14704716	0	2	50,50	0,376
chrX	14704290	14704726	gesPSI:0.94452828	950	-	14704290	14704726	0	2	50,50	0,386
chrV	14731668	14731824	gesPSI:0.83299967	950	-	14731668	14731824	0	2	50,50	0,106
chrV	14731680	14731824	gesPSI:0.16700033	950	-	14731680	14731824	0	2	50,50	0,94
chrIV	14783489	14783673	gesPSI:0.10903237	950	-	14783489	14783673	0	2	50,50	0,134
chrIV	14783489	14783692	gesPSI:0.89096763	950	-	14783489	14783692	0	2	50,50	0,153
chrI	14814710	14814864	gesPSI:0.77608534	950	+	14814710	14814864	0	2	50,50	0,104
chrI	14814710	14814858	gesPSI:0.22391466	950	+	14814710	14814858	0	2	50,50	0,98
chrII	14816666	14816812	gesPSI:0.18359375	950	-	14816666	14816812	0	2	50,50	0,96
chrII	14816666	14816821	gesPSI:0.81640625	950	-	14816666	14816821	0	2	50,50	0,105
chrX	14817575	14817724	gesPSI:0.39630581	950	-	14817575	14817724	0	2	50,50	0,99
chrX	14817569	14817724	gesPSI:0.60369419	950	-	14817569	14817724	0	2	50,50	0,105
chrX	14848381	14848536	gesPSI:0.27860931	950	+	14848381	14848536	0	2	50,50	0,105
chrX	14848381	14848529	gesPSI:0.72139069	950	+	14848381	14848529	0	2	50,50	0,98
chrX	14855032	14855622	gesPSI:0.53253968	950	+	14855032	14855622	0	2	50,50	0,540
chrX	14855032	14855616	gesPSI:0.46746032	950	+	14855032	14855616	0	2	50,50	0,534
chrV	14937114	14937856	gesPSI:0.40340909	950	+	14937114	14937856	0	2	50,50	0,692
chrV	14937114	14937862	gesPSI:0.59659091	950	+	14937114	14937862	0	2	50,50	0,698
chrV	14951961	14952395	gesPSI:0.34192440	950	+	14951961	14952395	0	2	50,50	0,384
chrV	14951949	14952395	gesPSI:0.65807560	950	+	14951949	14952395	0	2	50,50	0,396
chrX	14973414	14974182	gesPSI:0.11359513	950	+	14973414	14974182	0	2	50,50	0,718
chrX	14973414	14974188	gesPSI:0.88640487	950	+	14973414	14974188	0	2	50,50	0,724
chrI	15037957	15038102	gesPSI:0.46366970	950	+	15037957	15038102	0	2	50,50	0,95
chrI	15037957	15038111	gesPSI:0.53633030	950	+	15037957	15038111	0	2	50,50	0,104
chrV	15081571	15081791	gesPSI:0.66711526	950	-	15081571	15081791	0	2	50,50	0,170
chrV	15081571	15081796	gesPSI:0.33288474	950	-	15081571	15081796	0	2	50,50	0,175
chrV	15165075	15165222	gesPSI:0.84858622	950	-	15165075	15165222	0	2	50,50	0,97
chrV	15165075	15165218	gesPSI:0.15141378	950	-	15165075	15165218	0	2	50,50	0,93
chrX	15409475	15409617	gesPSI:0.39820201	950	-	15409475	15409617	0	2	50,50	0,92
chrX	15409466	15409617	gesPSI:0.60179799	950	-	15409466	15409617	0	2	50,50	0,101
chrX	15522368	15522981	gesPSI:0.83791458	950	+	15522368	15522981	0	2	50,50	0,563
chrX	15522368	15522975	gesPSI:0.16208542	950	+	15522368	15522975	0	2	50,50	0,557
chrV	15575024	15575388	gesPSI:0.32868262	950	-	15575024	15575388	0	2	50,50	0,314
chrV	15575018	15575388	gesPSI:0.67131738	950	-	15575018	15575388	0	2	50,50	0,320
chrV	15578107	15578269	gesPSI:0.57778058	950	-	15578107	15578269	0	2	50,50	0,112
chrV	15578118	15578269	gesPSI:0.42221942	950	-	15578118	15578269	0	2	50,50	0,101
chrX	16084778	16085084	gesPSI:0.64407468	950	+	16084778	16085084	0	2	50,50	0,256
chrX	16084838	16085084	gesPSI:0.35592532	950	+	16084838	16085084	0	2	50,50	0,196
chrIV	16157548	16157883	gesPSI:0.73735274	950	-	16157548	16157883	0	2	50,50	0,285
chrIV	16157548	16157872	gesPSI:0.26264726	950	-	16157548	16157872	0	2	50,50	0,274
chrX	16635183	16635347	gesPSI:0.38926941	950	+	16635183	16635347	0	2	50,50	0,114
chrX	16635183	16635353	gesPSI:0.61073059	950	+	16635183	16635353	0	2	50,50	0,120
chrX	16665882	16666027	gesPSI:0.76646379	950	-	16665882	16666027	0	2	50,50	0,95
chrX	16665876	16666027	gesPSI:0.23353621	950	-	16665876	16666027	0	2	50,50	0,101
chrIV	16670625	16670776	gesPSI:0.65108658	950	+	16670625	16670776	0	2	50,50	0,101
chrIV	16670625	16670767	gesPSI:0.34891342	950	+	16670625	16670767	0	2	50,50	0,92
chrV	16818317	16818463	gesPSI:0.20976687	950	+	16818317	16818463	0	2	50,50	0,96
chrV	16818311	16818463	gesPSI:0.79023313	950	+	16818311	16818463	0	2	50,50	0,102
chrV	16928838	16928991	gesPSI:0.46453798	950	+	16928838	16928991	0	2	50,50	0,103
chrV	16928838	16928985	gesPSI:0.53546202	950	+	16928838	16928985	0	2	50,50	0,97
chrX	17065192	17066061	gesPSI:0.10983459	950	-	17065192	17066061	0	2	50,50	0,819
chrX	17065231	17066061	gesPSI:0.89016541	950	-	17065231	17066061	0	2	50,50	0,780
chrIV	17374448	17374634	gesPSI:0.60583557	950	+	17374448	17374634	0	2	50,50	0,136
chrIV	17374448	17374625	gesPSI:0.39416443	950	+	17374448	17374625	0	2	50,50	0,127
chrX	17522431	17523539	gesPSI:0.75973831	950	+	17522431	17523539	0	2	50,50	0,1058
chrX	17522431	17523524	gesPSI:0.24026169	950	+	17522431	17523524	0	2	50,50	0,1043
chrX	17679619	17679971	gesPSI:0.54068654	950	+	17679619	17679971	0	2	50,50	0,302
chrX	17679269	17679971	gesPSI:0.45931346	950	+	17679269	17679971	0	2	50,50	0,652
chrV	18090291	18091424	gesPSI:0.53492063	950	+	18090291	18091424	0	2	50,50	0,1083
chrV	18090291	18091379	gesPSI:0.46507937	950	+	18090291	18091379	0	2	50,50	0,1038
chrV	18462892	18463521	gesPSI:0.14127837	950	+	18462892	18463521	0	2	50,50	0,579
chrV	18462921	18463521	gesPSI:0.85872163	950	+	18462921	18463521	0	2	50,50	0,550
chrV	18660930	18661137	gesPSI:0.74464306	950	-	18660930	18661137	0	2	50,50	0,157
chrV	18660915	18661137	gesPSI:0.25535694	950	-	18660915	18661137	0	2	50,50	0,172
chrV	18721038	18722253	gesPSI:0.06777269	950	-	18721038	18722253	0	2	50,50	0,1165
chrV	18721041	18722253	gesPSI:0.93222731	950	-	18721041	18722253	0	2	50,50	0,1162
chrV	19121884	19122033	gesPSI:0.38279478	950	-	19121884	19122033	0	2	50,50	0,99
chrV	19121878	19122033	gesPSI:0.61720522	950	-	19121878	19122033	0	2	50,50	0,105
chrV	19378535	19379329	gesPSI:0.65612421	950	+	19378535	19379329	0	2	50,50	0,744
chrV	19378502	19379329	gesPSI:0.34387579	950	+	19378502	19379329	0	2	50,50	0,777
chrV	19406080	19406229	gesPSI:0.91536246	950	+	19406080	19406229	0	2	50,50	0,99
chrV	19406080	19406222	gesPSI:0.08463754	950	+	19406080	19406222	0	2	50,50	0,92
chrV	19452959	19453226	gesPSI:0.28933190	950	-	19452959	19453226	0	2	50,50	0,217
chrV	19453038	19453226	gesPSI:0.71066810	950	-	19453038	19453226	0	2	50,50	0,138
chrV	19917991	19919514	gesPSI:0.06555429	950	+	19917991	19919514	0	2	50,50	0,1473
chrV	19918072	19919514	gesPSI:0.93444571	950	+	19918072	19919514	0	2	50,50	0,1392
chrV	20239966	20241309	gesPSI:0.11483848	950	-	20239966	20241309	0	2	50,50	0,1293
chrV	20239957	20241309	gesPSI:0.88516152	950	-	20239957	20241309	0	2	50,50	0,1302
chrV	20784015	20784185	gesPSI:0.23736130	950	+	20784015	20784185	0	2	50,50	0,120
chrV	20784015	20784191	gesPSI:0.76263870	950	+	20784015	20784191	0	2	50,50	0,126
chrV	20791307	20791455	gesPSI:0.90581386	950	-	20791307	20791455	0	2	50,50	0,98
chrV	20791298	20791455	gesPSI:0.09418614	950	-	20791298	20791455	0	2	50,50	0,107
chrV	20792250	20792393	gesPSI:0.50275696	950	-	20792250	20792393	0	2	50,50	0,93
chrV	20792247	20792393	gesPSI:0.49724304	950	-	20792247	20792393	0	2	50,50	0,96
Alt Start/Terminal
track name=ges_AltST description='ges_AltST'
chrX	751554	753147	gesPSI:0.47753086	950	-	751554	753147	0	2	50,50	0,1543
chrX	752908	753147	gesPSI:0.52246914	950	-	752908	753147	0	2	50,50	0,189
chrI	2615887	2616052	gesPSI:0.06981559	950	+	2615887	2616052	0	2	50,50	0,115
chrI	2615887	2617140	gesPSI:0.93018441	950	+	2615887	2617140	0	2	50,50	0,1203
chrII	4763662	4763981	gesPSI:0.87098428	950	+	4763662	4763981	0	2	50,50	0,269
chrII	4763808	4763981	gesPSI:0.12901572	950	+	4763808	4763981	0	2	50,50	0,123
chrIV	4828061	4828800	gesPSI:0.59736251	950	-	4828061	4828800	0	2	50,50	0,689
chrIV	4828594	4828800	gesPSI:0.40263749	950	-	4828594	4828800	0	2	50,50	0,156
chrI	5290468	5291543	gesPSI:0.39632353	950	-	5290468	5291543	0	2	50,50	0,1025
chrI	5290468	5290667	gesPSI:0.60367647	950	-	5290468	5290667	0	2	50,50	0,149
chrIII	5344066	5344211	gesPSI:0.07306402	950	+	5344066	5344211	0	2	50,50	0,95
chrIII	5344066	5344224	gesPSI:0.92693598	950	+	5344066	5344224	0	2	50,50	0,108
chrII	5768950	5769148	gesPSI:0.37300380	950	+	5768950	5769148	0	2	50,50	0,148
chrII	5765724	5769148	gesPSI:0.62699620	950	+	5765724	5769148	0	2	50,50	0,3374
chrX	5893844	5894310	gesPSI:0.86217410	950	+	5893844	5894310	0	2	50,50	0,416
chrX	5893844	5894298	gesPSI:0.13782590	950	+	5893844	5894298	0	2	50,50	0,404
chrI	6060626	6060936	gesPSI:0.77449823	950	-	6060626	6060936	0	2	50,50	0,260
chrI	6060626	6060805	gesPSI:0.22550177	950	-	6060626	6060805	0	2	50,50	0,129
chrII	6486740	6486900	gesPSI:0.86855483	950	+	6486740	6486900	0	2	50,50	0,110
chrII	6485741	6486900	gesPSI:0.13144517	950	+	6485741	6486900	0	2	50,50	0,1109
chrIII	7716921	7717099	gesPSI:0.07407407	950	+	7716921	7717099	0	2	50,50	0,128
chrIII	7716921	7717194	gesPSI:0.92592593	950	+	7716921	7717194	0	2	50,50	0,223
chrX	7724068	7725086	gesPSI:0.44223263	950	+	7724068	7725086	0	2	50,50	0,968
chrX	7724579	7725086	gesPSI:0.55776737	950	+	7724579	7725086	0	2	50,50	0,457
chrII	7776246	7777716	gesPSI:0.60918134	950	-	7776246	7777716	0	2	50,50	0,1420
chrII	7776246	7776400	gesPSI:0.39081866	950	-	7776246	7776400	0	2	50,50	0,104
chrV	7845693	7846144	gesPSI:0.49889311	950	-	7845693	7846144	0	2	50,50	0,401
chrV	7845693	7847043	gesPSI:0.50110689	950	-	7845693	7847043	0	2	50,50	0,1300
chrI	8670170	8670938	gesPSI:0.43229665	950	-	8670170	8670938	0	2	50,50	0,718
chrI	8670170	8673570	gesPSI:0.56770335	950	-	8670170	8673570	0	2	50,50	0,3350
chrIII	8827608	8827829	gesPSI:0.12745112	950	-	8827608	8827829	0	2	50,50	0,171
chrIII	8827608	8828094	gesPSI:0.87254888	950	-	8827608	8828094	0	2	50,50	0,436
chrII	9132962	9133684	gesPSI:0.54242424	950	+	9132962	9133684	0	2	50,50	0,672
chrII	9132215	9133684	gesPSI:0.45757576	950	+	9132215	9133684	0	2	50,50	0,1419
chrI	9614159	9615024	gesPSI:0.11236045	950	-	9614159	9615024	0	2	50,50	0,815
chrI	9614764	9615024	gesPSI:0.88763955	950	-	9614764	9615024	0	2	50,50	0,210
chrV	9732187	9732564	gesPSI:0.57555781	950	+	9732187	9732564	0	2	50,50	0,327
chrV	9730116	9732564	gesPSI:0.42444219	950	+	9730116	9732564	0	2	50,50	0,2398
chrX	9866722	9867177	gesPSI:0.59363799	950	+	9866722	9867177	0	2	50,50	0,405
chrX	9867026	9867177	gesPSI:0.40636201	950	+	9867026	9867177	0	2	50,50	0,101
chrX	9867476	9869162	gesPSI:0.45151515	950	+	9867476	9869162	0	2	50,50	0,1636
chrX	9867476	9867827	gesPSI:0.54848485	950	+	9867476	9867827	0	2	50,50	0,301
chrI	9933647	9933911	gesPSI:0.29867902	950	-	9933647	9933911	0	2	50,50	0,214
chrI	9933647	9934202	gesPSI:0.70132098	950	-	9933647	9934202	0	2	50,50	0,505
chrIV	9996741	9997608	gesPSI:0.50800356	950	-	9996741	9997608	0	2	50,50	0,817
chrIV	9996741	9998883	gesPSI:0.49199644	950	-	9996741	9998883	0	2	50,50	0,2092
chrX	11998041	11998549	gesPSI:0.19437043	950	-	11998041	11998549	0	2	50,50	0,458
chrX	11998357	11998549	gesPSI:0.80562957	950	-	11998357	11998549	0	2	50,50	0,142
chrII	14470581	14470783	gesPSI:0.83630787	950	-	14470581	14470783	0	2	50,50	0,152
chrII	14470581	14471708	gesPSI:0.16369213	950	-	14470581	14471708	0	2	50,50	0,1077
chrV	14627327	14627857	gesPSI:0.23132428	950	+	14627327	14627857	0	2	50,50	0,480
chrV	14621304	14627857	gesPSI:0.76867572	950	+	14621304	14627857	0	2	50,50	0,6503
chrV	14653878	14654952	gesPSI:0.31951220	950	-	14653878	14654952	0	2	50,50	0,1024
chrV	14654400	14654952	gesPSI:0.68048780	950	-	14654400	14654952	0	2	50,50	0,502
chrV	14779237	14779617	gesPSI:0.85481635	950	-	14779237	14779617	0	2	50,50	0,330
chrV	14779237	14779385	gesPSI:0.14518365	950	-	14779237	14779385	0	2	50,50	0,98
chrII	14952401	14953002	gesPSI:0.28404040	950	+	14952401	14953002	0	2	50,50	0,551
chrII	14952401	14952659	gesPSI:0.71595960	950	+	14952401	14952659	0	2	50,50	0,208
chrV	15476211	15476591	gesPSI:0.19399586	950	-	15476211	15476591	0	2	50,50	0,330
chrV	15476372	15476515	gesPSI:0.80600414	950	-	15476372	15476515	0	2	50,50	0,93
chrV	16394513	16394908	gesPSI:0.59510204	950	-	16394513	16394908	0	2	50,50	0,345
chrV	16394513	16394848	gesPSI:0.40489796	950	-	16394513	16394848	0	2	50,50	0,285
chrIV	16434217	16436370	gesPSI:0.13323414	950	+	16434217	16436370	0	2	50,50	0,2103
chrIV	16432238	16436370	gesPSI:0.86676586	950	+	16432238	16436370	0	2	50,50	0,4082
chrV	16602029	16608705	gesPSI:0.34722222	950	-	16602029	16608705	0	2	50,50	0,6626
chrV	16602029	16602555	gesPSI:0.65277778	950	-	16602029	16602555	0	2	50,50	0,476
chrX	16809548	16813585	gesPSI:0.71267097	950	-	16809548	16813585	0	2	50,50	0,3987
chrX	16809548	16809748	gesPSI:0.28732903	950	-	16809548	16809748	0	2	50,50	0,150
chrX	17335792	17335933	gesPSI:0.20957270	950	+	17335792	17335933	0	2	50,50	0,91
chrX	17335792	17335945	gesPSI:0.79042730	950	+	17335792	17335945	0	2	50,50	0,103
ME
track name=ges_ME description='ges_ME'
chrIII	4325305	4325468	gesPSI:0.2951895	950	-	4325305	4325468	0	2	50,50	0,113
chrIII	4325305	4325584	gesPSI:0.7048105	950	-	4325305	4325584	0	2	50,50	0,229
chrIII	4325473	4325795	gesPSI:0.4016925	950	-	4325473	4325795	0	2	50,50	0,272
chrIII	4325592	4325795	gesPSI:0.5983075	950	-	4325592	4325795	0	2	50,50	0,153
chrV	4505466	4505878	gesPSI:0.5587941	950	+	4505466	4505878	0	2	50,50	0,362
chrV	4505070	4505878	gesPSI:0.4412059	950	+	4505070	4505878	0	2	50,50	0,758
chrI	7301376	7301956	gesPSI:0.8428792	950	-	7301376	7301956	0	2	50,50	0,530
chrI	7301376	7301712	gesPSI:0.1571208	950	-	7301376	7301712	0	2	50,50	0,286
chrI	7301724	7302121	gesPSI:0.1594462	950	-	7301724	7302121	0	2	50,50	0,347
chrI	7301977	7302121	gesPSI:0.8405538	950	-	7301977	7302121	0	2	50,50	0,94
chrI	7837669	7838659	gesPSI:0.6551418	950	+	7837669	7838659	0	2	50,50	0,940
chrI	7837669	7837893	gesPSI:0.3448582	950	+	7837669	7837893	0	2	50,50	0,174
chrI	7838642	7838821	gesPSI:0.7066548	950	+	7838642	7838821	0	2	50,50	0,129
chrI	7837876	7838821	gesPSI:0.2933452	950	+	7837876	7838821	0	2	50,50	0,895
chrV	8788628	8789511	gesPSI:0.1982688	950	+	8788628	8789511	0	2	50,50	0,833
chrV	8788628	8789064	gesPSI:0.8017312	950	+	8788628	8789064	0	2	50,50	0,386
chrV	8789057	8789890	gesPSI:0.8143659	950	+	8789057	8789890	0	2	50,50	0,783
chrV	8789519	8789890	gesPSI:0.1856341	950	+	8789519	8789890	0	2	50,50	0,321
chrIII	8909061	8909282	gesPSI:0.1801430	950	+	8909061	8909282	0	2	50,50	0,171
chrIII	8909061	8910130	gesPSI:0.8198570	950	+	8909061	8910130	0	2	50,50	0,1019
chrIII	8910171	8910383	gesPSI:0.7557465	950	+	8910171	8910383	0	2	50,50	0,162
chrIII	8909305	8910383	gesPSI:0.2442535	950	+	8909305	8910383	0	2	50,50	0,1028
chrV	10250626	10250890	gesPSI:0.7273148	950	+	10250626	10250890	0	2	50,50	0,214
chrV	10250626	10251376	gesPSI:0.2726852	950	+	10250626	10251376	0	2	50,50	0,700
chrV	10250982	10251726	gesPSI:0.6876430	950	+	10250982	10251726	0	2	50,50	0,694
chrV	10251483	10251726	gesPSI:0.3123570	950	+	10251483	10251726	0	2	50,50	0,193
chrIV	17478258	17478449	gesPSI:0.3240741	950	+	17478258	17478449	0	2	50,50	0,141
chrIV	17478258	17478904	gesPSI:0.6759259	950	+	17478258	17478904	0	2	50,50	0,596
chrIV	17479052	17479193	gesPSI:0.5592178	950	+	17479052	17479193	0	2	50,50	0,91
chrIV	17478597	17479193	gesPSI:0.4407822	950	+	17478597	17479193	0	2	50,50	0,546
IR
track name=ges_IR description='ges_IR'
chrIV	430558	430700	gesPSI:0.77610015	950	-	430558	430700	0	2	50,50	0,92
chrIV	430558	430658	gesPSI:0.22389985	950	-	430558	430658	0	2	50,50	0,50
chrI	559655	559755	gesPSI:0.11047980	950	+	559655	559755	0	2	50,50	0,50
chrI	559613	559755	gesPSI:0.88952020	950	+	559613	559755	0	2	50,50	0,92
chrIV	1603221	1603321	gesPSI:0.90980392	950	+	1603221	1603321	0	2	50,50	0,50
chrIV	1603169	1603321	gesPSI:0.09019608	950	+	1603169	1603321	0	2	50,50	0,102
chrV	2326739	2326881	gesPSI:0.15868701	950	+	2326739	2326881	0	2	50,50	0,92
chrV	2326781	2326881	gesPSI:0.84131299	950	+	2326781	2326881	0	2	50,50	0,50
chrII	2623885	2624033	gesPSI:0.60538847	950	+	2623885	2624033	0	2	50,50	0,98
chrII	2623933	2624033	gesPSI:0.39461153	950	+	2623933	2624033	0	2	50,50	0,50
chrX	2696254	2696405	gesPSI:0.41688833	950	+	2696254	2696405	0	2	50,50	0,101
chrX	2696305	2696405	gesPSI:0.58311167	950	+	2696305	2696405	0	2	50,50	0,50
chrIII	4165174	4165274	gesPSI:0.77747296	950	-	4165174	4165274	0	2	50,50	0,50
chrIII	4165174	4165325	gesPSI:0.22252704	950	-	4165174	4165325	0	2	50,50	0,101
chrIII	4194502	4194625	gesPSI:0.13953017	950	+	4194502	4194625	0	2	50,50	0,73
chrIII	4194525	4194625	gesPSI:0.86046983	950	+	4194525	4194625	0	2	50,50	0,50
chrIV	4448423	4448689	gesPSI:0.90075222	950	+	4448423	4448689	0	2	50,50	0,216
chrIV	4448589	4448689	gesPSI:0.09924778	950	+	4448589	4448689	0	2	50,50	0,50
chrI	4555966	4556066	gesPSI:0.28921569	950	-	4555966	4556066	0	2	50,50	0,50
chrI	4555965	4556112	gesPSI:0.71078431	950	-	4555965	4556112	0	2	50,50	0,97
chrV	4582149	4582310	gesPSI:0.66776316	950	+	4582149	4582310	0	2	50,50	0,111
chrV	4582210	4582310	gesPSI:0.33223684	950	+	4582210	4582310	0	2	50,50	0,50
chrIV	5185722	5185874	gesPSI:0.34079067	950	-	5185722	5185874	0	2	50,50	0,102
chrIV	5185722	5185822	gesPSI:0.65920933	950	-	5185722	5185822	0	2	50,50	0,50
chrII	6366298	6366443	gesPSI:0.86203390	950	+	6366298	6366443	0	2	50,50	0,95
chrII	6366343	6366443	gesPSI:0.13796610	950	+	6366343	6366443	0	2	50,50	0,50
chrIII	6546786	6546941	gesPSI:0.92415210	950	-	6546786	6546941	0	2	50,50	0,105
chrIII	6546786	6546886	gesPSI:0.07584790	950	-	6546786	6546886	0	2	50,50	0,50
chrX	7436860	7436960	gesPSI:0.06842532	950	-	7436860	7436960	0	2	50,50	0,50
chrX	7436860	7437019	gesPSI:0.93157468	950	-	7436860	7437019	0	2	50,50	0,109
chrIV	7572669	7572829	gesPSI:0.50124138	950	+	7572669	7572829	0	2	50,50	0,110
chrIV	7572723	7572823	gesPSI:0.49875862	950	+	7572723	7572823	0	2	50,50	0,50
chrI	7736950	7737050	gesPSI:0.33607663	950	+	7736950	7737050	0	2	50,50	0,50
chrI	7736894	7737050	gesPSI:0.66392337	950	+	7736894	7737050	0	2	50,50	0,106
chrII	8104764	8104864	gesPSI:0.19972222	950	-	8104764	8104864	0	2	50,50	0,50
chrII	8104764	8104957	gesPSI:0.80027778	950	-	8104764	8104957	0	2	50,50	0,143
chrV	8513052	8513226	gesPSI:0.87360894	950	-	8513052	8513226	0	2	50,50	0,124
chrV	8513059	8513159	gesPSI:0.12639106	950	-	8513059	8513159	0	2	50,50	0,50
chrX	8913867	8913967	gesPSI:0.89723082	950	+	8913867	8913967	0	2	50,50	0,50
chrX	8913792	8913967	gesPSI:0.10276918	950	+	8913792	8913967	0	2	50,50	0,125
chrI	9392360	9392512	gesPSI:0.08202949	950	-	9392360	9392512	0	2	50,50	0,102
chrI	9392360	9392460	gesPSI:0.91797051	950	-	9392360	9392460	0	2	50,50	0,50
chrIII	9462144	9462295	gesPSI:0.25883512	950	+	9462144	9462295	0	2	50,50	0,101
chrIII	9462195	9462295	gesPSI:0.74116488	950	+	9462195	9462295	0	2	50,50	0,50
chrIV	9864375	9864537	gesPSI:0.56215233	950	+	9864375	9864537	0	2	50,50	0,112
chrIV	9864437	9864537	gesPSI:0.43784767	950	+	9864437	9864537	0	2	50,50	0,50
chrI	10120131	10120277	gesPSI:0.15710872	950	-	10120131	10120277	0	2	50,50	0,96
chrI	10120131	10120231	gesPSI:0.84289128	950	-	10120131	10120231	0	2	50,50	0,50
chrIV	11030332	11030477	gesPSI:0.90154188	950	-	11030332	11030477	0	2	50,50	0,95
chrIV	11030332	11030432	gesPSI:0.09845812	950	-	11030332	11030432	0	2	50,50	0,50
chrV	11626309	11626468	gesPSI:0.15597942	950	-	11626309	11626468	0	2	50,50	0,109
chrV	11626309	11626409	gesPSI:0.84402058	950	-	11626309	11626409	0	2	50,50	0,50
chrIV	11820730	11820874	gesPSI:0.63485533	950	-	11820730	11820874	0	2	50,50	0,94
chrIV	11820736	11820836	gesPSI:0.36514467	950	-	11820736	11820836	0	2	50,50	0,50
chrV	12064430	12064530	gesPSI:0.35907551	950	-	12064430	12064530	0	2	50,50	0,50
chrV	12064430	12064912	gesPSI:0.64092449	950	-	12064430	12064912	0	2	50,50	0,432
chrIV	13607941	13608041	gesPSI:0.09890088	950	-	13607941	13608041	0	2	50,50	0,50
chrIV	13607941	13608087	gesPSI:0.90109912	950	-	13607941	13608087	0	2	50,50	0,96
chrV	14082981	14083081	gesPSI:0.21290297	950	+	14082981	14083081	0	2	50,50	0,50
chrV	14082945	14083096	gesPSI:0.78709703	950	+	14082945	14083096	0	2	50,50	0,101
chrI	14665248	14665453	gesPSI:0.69893641	950	+	14665248	14665453	0	2	50,50	0,155
chrI	14665353	14665453	gesPSI:0.30106359	950	+	14665353	14665453	0	2	50,50	0,50
chrV	17091231	17091331	gesPSI:0.19535017	950	+	17091231	17091331	0	2	50,50	0,50
chrV	17091184	17091331	gesPSI:0.80464983	950	+	17091184	17091331	0	2	50,50	0,97
chrV	19436786	19436886	gesPSI:0.92336997	950	+	19436786	19436886	0	2	50,50	0,50
chrV	19436726	19436886	gesPSI:0.07663003	950	+	19436726	19436886	0	2	50,50	0,110
Complex
track name=ges_Complex description='ges_Complex'
chrIII	120725	123223	gesPSI:0.07354214	950	+	120725	123223	0	2	50,50	0,2448
chrIII	120725	122730	gesPSI:0.06394194	950	+	120725	122730	0	2	50,50	0,1955
chrIII	120725	121206	gesPSI:0.86251592	950	+	120725	121206	0	2	50,50	0,431
chrII	168343	168592	gesPSI:0.13340850	950	+	168343	168592	0	2	50,50	0,199
chrII	168343	168598	gesPSI:0.08332261	950	+	168343	168598	0	2	50,50	0,205
chrII	167997	168592	gesPSI:0.11035069	950	+	167997	168592	0	2	50,50	0,545
chrII	167997	168598	gesPSI:0.67291819	950	+	167997	168598	0	2	50,50	0,551
chrI	173675	173824	gesPSI:0.87500000	950	+	173675	173824	0	2	50,50	0,99
chrI	173724	173824	gesPSI:0.12500000	950	+	173724	173824	0	2	50,50	0,50
chrI	718314	718706	gesPSI:0.91644652	950	-	718314	718706	0	2	50,50	0,342
chrI	718361	718461	gesPSI:0.08355348	950	-	718361	718461	0	2	50,50	0,50
chrIII	941033	941185	gesPSI:0.07736915	950	-	941033	941185	0	2	50,50	0,102
chrIII	941044	941185	gesPSI:0.75668697	950	-	941044	941185	0	2	50,50	0,91
chrIII	941044	943395	gesPSI:0.16594387	950	-	941044	943395	0	2	50,50	0,2301
chrX	1551290	1558504	gesPSI:0.49685353	950	+	1551290	1558504	0	2	50,50	0,7164
chrX	1552037	1558504	gesPSI:0.20931284	950	+	1552037	1558504	0	2	50,50	0,6417
chrX	1550528	1558504	gesPSI:0.29383363	950	+	1550528	1558504	0	2	50,50	0,7926
chrI	1051975	1052618	gesPSI:0.14173556	950	-	1051975	1052618	0	2	50,50	0,593
chrI	1051975	1052123	gesPSI:0.07615387	950	-	1051975	1052123	0	2	50,50	0,98
chrI	1051975	1052141	gesPSI:0.78211057	950	-	1051975	1052141	0	2	50,50	0,116
chrIII	1283281	1284111	gesPSI:0.39601140	950	-	1283281	1284111	0	2	50,50	0,780
chrIII	1282593	1284111	gesPSI:0.27635328	950	-	1282593	1284111	0	2	50,50	0,1468
chrIII	1282687	1284111	gesPSI:0.32763533	950	-	1282687	1284111	0	2	50,50	0,1374
chrIV	1406558	1406709	gesPSI:0.10467980	950	+	1406558	1406709	0	2	50,50	0,101
chrIV	1406609	1406709	gesPSI:0.89532020	950	+	1406609	1406709	0	2	50,50	0,50
chrX	2509811	2509976	gesPSI:0.55528571	950	-	2509811	2509976	0	2	50,50	0,115
chrX	2509820	2509976	gesPSI:0.25542857	950	-	2509820	2509976	0	2	50,50	0,106
chrX	2509811	2510026	gesPSI:0.18928571	950	-	2509811	2510026	0	2	50,50	0,165
chrX	1555094	1558504	gesPSI:0.18733954	950	+	1555094	1558504	0	2	50,50	0,3360
chrX	1552859	1558504	gesPSI:0.12310884	950	+	1552859	1558504	0	2	50,50	0,5595
chrX	1552583	1558504	gesPSI:0.11975060	950	+	1552583	1558504	0	2	50,50	0,5871
chrIV	3144791	3146468	gesPSI:0.55337079	950	+	3144791	3146468	0	2	50,50	0,1627
chrIV	3145138	3146468	gesPSI:0.20326864	950	+	3145138	3146468	0	2	50,50	0,1280
chrIV	3145220	3146468	gesPSI:0.24336057	950	+	3145220	3146468	0	2	50,50	0,1198
chrI	3340546	3340697	gesPSI:0.05862994	950	-	3340546	3340697	0	2	50,50	0,101
chrI	3340549	3340697	gesPSI:0.63814629	950	-	3340549	3340697	0	2	50,50	0,98
chrI	3340555	3340697	gesPSI:0.30322377	950	-	3340555	3340697	0	2	50,50	0,92
chrIII	2422550	2423003	gesPSI:0.92316735	950	+	2422550	2423003	0	2	50,50	0,403
chrIII	2422875	2422975	gesPSI:0.07683265	950	+	2422875	2422975	0	2	50,50	0,50
chrIII	2508951	2509099	gesPSI:0.23237179	950	+	2508951	2509099	0	2	50,50	0,98
chrIII	2508951	2509051	gesPSI:0.76762821	950	+	2508951	2509051	0	2	50,50	0,50
chrII	3969395	3970078	gesPSI:0.30146520	950	+	3969395	3970078	0	2	50,50	0,633
chrII	3969372	3970078	gesPSI:0.27087912	950	+	3969372	3970078	0	2	50,50	0,656
chrII	3969413	3970078	gesPSI:0.42765568	950	+	3969413	3970078	0	2	50,50	0,615
chrIV	2670147	2670523	gesPSI:0.05138062	950	+	2670147	2670523	0	2	50,50	0,326
chrIV	2670147	2670247	gesPSI:0.94861938	950	+	2670147	2670247	0	2	50,50	0,50
chrI	2081926	2082863	gesPSI:0.07474105	950	+	2081926	2082863	0	2	50,50	0,887
chrI	2082025	2082863	gesPSI:0.13918284	950	+	2082025	2082863	0	2	50,50	0,788
chrI	2081259	2082863	gesPSI:0.78607611	950	+	2081259	2082863	0	2	50,50	0,1554
chrI	2866561	2867293	gesPSI:0.69295652	950	+	2866561	2867293	0	2	50,50	0,682
chrI	2866555	2867293	gesPSI:0.18333333	950	+	2866555	2867293	0	2	50,50	0,688
chrI	2866561	2867475	gesPSI:0.12371014	950	+	2866561	2867475	0	2	50,50	0,864
chrIV	2901047	2901193	gesPSI:0.33469945	950	+	2901047	2901193	0	2	50,50	0,96
chrIV	2901051	2901151	gesPSI:0.66530055	950	+	2901051	2901151	0	2	50,50	0,50
chrIV	4564258	4564586	gesPSI:0.78232121	950	+	4564258	4564586	0	2	50,50	0,278
chrIV	4564276	4564586	gesPSI:0.15494190	950	+	4564276	4564586	0	2	50,50	0,260
chrIV	4564258	4564577	gesPSI:0.06273689	950	+	4564258	4564577	0	2	50,50	0,269
chrIV	4564660	4564807	gesPSI:0.05169949	950	+	4564660	4564807	0	2	50,50	0,97
chrIV	4564660	4564814	gesPSI:0.83260773	950	+	4564660	4564814	0	2	50,50	0,104
chrIV	4564664	4564814	gesPSI:0.11569278	950	+	4564664	4564814	0	2	50,50	0,100
chrI	3072922	3076613	gesPSI:0.47283412	950	-	3072922	3076613	0	2	50,50	0,3641
chrI	3075217	3076613	gesPSI:0.46199052	950	-	3075217	3076613	0	2	50,50	0,1346
chrI	3075202	3076613	gesPSI:0.06517536	950	-	3075202	3076613	0	2	50,50	0,1361
chrIII	5000774	5000925	gesPSI:0.08457072	950	+	5000774	5000925	0	2	50,50	0,101
chrIII	5000774	5000912	gesPSI:0.81482486	950	+	5000774	5000912	0	2	50,50	0,88
chrIII	5000774	5000915	gesPSI:0.10060442	950	+	5000774	5000915	0	2	50,50	0,91
chrX	3504047	3504315	gesPSI:0.37477902	950	+	3504047	3504315	0	2	50,50	0,218
chrX	3504215	3504315	gesPSI:0.62522098	950	+	3504215	3504315	0	2	50,50	0,50
chrIV	3605010	3605152	gesPSI:0.07644165	950	-	3605010	3605152	0	2	50,50	0,92
chrIV	3605052	3605152	gesPSI:0.92355835	950	-	3605052	3605152	0	2	50,50	0,50
chrI	3667275	3667884	gesPSI:0.31153228	950	-	3667275	3667884	0	2	50,50	0,559
chrI	3667275	3667775	gesPSI:0.38535641	950	-	3667275	3667775	0	2	50,50	0,450
chrI	3667275	3667745	gesPSI:0.30311131	950	-	3667275	3667745	0	2	50,50	0,420
chrX	3668221	3668372	gesPSI:0.73631285	950	-	3668221	3668372	0	2	50,50	0,101
chrX	3668221	3668321	gesPSI:0.26368715	950	-	3668221	3668321	0	2	50,50	0,50
chrX	5716094	5716947	gesPSI:0.08483956	950	+	5716094	5716947	0	2	50,50	0,803
chrX	5716096	5716842	gesPSI:0.07383853	950	+	5716096	5716842	0	2	50,50	0,696
chrX	5716094	5716842	gesPSI:0.84132191	950	+	5716094	5716842	0	2	50,50	0,698
chrI	3828391	3828950	gesPSI:0.09811213	950	+	3828391	3828950	0	2	50,50	0,509
chrI	3828391	3828540	gesPSI:0.76618993	950	+	3828391	3828540	0	2	50,50	0,99
chrI	3828440	3828950	gesPSI:0.13569794	950	+	3828440	3828950	0	2	50,50	0,460
chrI	3860533	3862009	gesPSI:0.37685877	950	-	3860533	3862009	0	2	50,50	0,1426
chrI	3860533	3860691	gesPSI:0.45410160	950	-	3860533	3860691	0	2	50,50	0,108
chrI	3860533	3862547	gesPSI:0.16903963	950	-	3860533	3862547	0	2	50,50	0,1964
chrV	5854923	5855254	gesPSI:0.24169857	950	-	5854923	5855254	0	2	50,50	0,281
chrV	5854923	5855239	gesPSI:0.37205012	950	-	5854923	5855239	0	2	50,50	0,266
chrV	5854929	5855239	gesPSI:0.38625131	950	-	5854929	5855239	0	2	50,50	0,260
chrV	3968318	3968469	gesPSI:0.10120192	950	-	3968318	3968469	0	2	50,50	0,101
chrV	3968318	3968418	gesPSI:0.89879808	950	-	3968318	3968418	0	2	50,50	0,50
chrI	4001452	4002392	gesPSI:0.06254551	950	-	4001452	4002392	0	2	50,50	0,890
chrI	4002047	4002147	gesPSI:0.93745449	950	-	4002047	4002147	0	2	50,50	0,50
chrIV	3110001	3116671	gesPSI:0.26187948	950	-	3110001	3116671	0	2	50,50	0,6620
chrIV	3105254	3116671	gesPSI:0.41373105	950	-	3105254	3116671	0	2	50,50	0,11367
chrIV	3112465	3116671	gesPSI:0.32438947	950	-	3112465	3116671	0	2	50,50	0,4156
chrI	4164360	4164758	gesPSI:0.12451756	950	+	4164360	4164758	0	2	50,50	0,348
chrI	4164374	4164758	gesPSI:0.80215583	950	+	4164374	4164758	0	2	50,50	0,334
chrI	4164259	4164758	gesPSI:0.07332661	950	+	4164259	4164758	0	2	50,50	0,449
chrX	4266900	4267042	gesPSI:0.53000000	950	+	4266900	4267042	0	2	50,50	0,92
chrX	4266900	4267000	gesPSI:0.47000000	950	+	4266900	4267000	0	2	50,50	0,50
chrI	3423305	3423929	gesPSI:0.52725866	950	+	3423305	3423929	0	2	50,50	0,574
chrI	3422383	3423929	gesPSI:0.11568939	950	+	3422383	3423929	0	2	50,50	0,1496
chrI	3421191	3423929	gesPSI:0.35705196	950	+	3421191	3423929	0	2	50,50	0,2688
chrX	4687999	4688152	gesPSI:0.44139137	950	-	4687999	4688152	0	2	50,50	0,103
chrX	4687999	4688099	gesPSI:0.55860863	950	-	4687999	4688099	0	2	50,50	0,50
chrII	4952481	4952696	gesPSI:0.26417506	950	+	4952481	4952696	0	2	50,50	0,165
chrII	4952481	4952889	gesPSI:0.40968567	950	+	4952481	4952889	0	2	50,50	0,358
chrII	4952481	4953210	gesPSI:0.32613927	950	+	4952481	4953210	0	2	50,50	0,679
chrIV	3737867	3738759	gesPSI:0.28716127	950	-	3737867	3738759	0	2	50,50	0,842
chrIV	3737867	3738012	gesPSI:0.27023590	950	-	3737867	3738012	0	2	50,50	0,95
chrIV	3737867	3738832	gesPSI:0.44260282	950	-	3737867	3738832	0	2	50,50	0,915
chrIII	5019485	5019888	gesPSI:0.18341503	950	+	5019485	5019888	0	2	50,50	0,353
chrIII	5019485	5019894	gesPSI:0.73934356	950	+	5019485	5019894	0	2	50,50	0,359
chrIII	5019485	5020243	gesPSI:0.07724140	950	+	5019485	5020243	0	2	50,50	0,708
chrI	3800229	3803060	gesPSI:0.39792579	950	-	3800229	3803060	0	2	50,50	0,2781
chrI	3800229	3801884	gesPSI:0.39750984	950	-	3800229	3801884	0	2	50,50	0,1605
chrI	3800229	3800858	gesPSI:0.20456436	950	-	3800229	3800858	0	2	50,50	0,579
chrI	5139509	5139665	gesPSI:0.68888889	950	-	5139509	5139665	0	2	50,50	0,106
chrI	5139565	5139665	gesPSI:0.31111111	950	-	5139565	5139665	0	2	50,50	0,50
chrX	3905828	3906863	gesPSI:0.66719745	950	+	3905828	3906863	0	2	50,50	0,985
chrX	3906134	3906863	gesPSI:0.18347488	950	+	3906134	3906863	0	2	50,50	0,679
chrX	3905570	3906863	gesPSI:0.14932767	950	+	3905570	3906863	0	2	50,50	0,1243
chrII	3921753	3924510	gesPSI:0.06805888	950	-	3921753	3924510	0	2	50,50	0,2707
chrII	3922013	3924510	gesPSI:0.50151508	950	-	3922013	3924510	0	2	50,50	0,2447
chrII	3920902	3924510	gesPSI:0.06175533	950	-	3920902	3924510	0	2	50,50	0,3558
chrII	3920336	3924510	gesPSI:0.36867072	950	-	3920336	3924510	0	2	50,50	0,4124
chrI	5429573	5429796	gesPSI:0.38595266	950	-	5429573	5429796	0	2	50,50	0,173
chrI	5429573	5429876	gesPSI:0.40107692	950	-	5429573	5429876	0	2	50,50	0,253
chrI	5429573	5429877	gesPSI:0.21297041	950	-	5429573	5429877	0	2	50,50	0,254
chrII	5492865	5493008	gesPSI:0.15495495	950	+	5492865	5493008	0	2	50,50	0,93
chrII	5492865	5492965	gesPSI:0.84504505	950	+	5492865	5492965	0	2	50,50	0,50
chrIII	5971730	5972558	gesPSI:0.43217266	950	-	5971730	5972558	0	2	50,50	0,778
chrIII	5971730	5972946	gesPSI:0.05968919	950	-	5971730	5972946	0	2	50,50	0,1166
chrIII	5971730	5972611	gesPSI:0.46320990	950	-	5971730	5972611	0	2	50,50	0,831
chrIII	6208140	6208462	gesPSI:0.80549729	950	+	6208140	6208462	0	2	50,50	0,272
chrIII	6208140	6208240	gesPSI:0.19450271	950	+	6208140	6208240	0	2	50,50	0,50
chrII	6350307	6350511	gesPSI:0.19923893	950	-	6350307	6350511	0	2	50,50	0,154
chrII	6350361	6350511	gesPSI:0.29977523	950	-	6350361	6350511	0	2	50,50	0,100
chrII	6350307	6350478	gesPSI:0.50098584	950	-	6350307	6350478	0	2	50,50	0,121
chrI	9537148	9538249	gesPSI:0.17019704	950	-	9537148	9538249	0	2	50,50	0,1051
chrI	9537148	9538241	gesPSI:0.40418719	950	-	9537148	9538241	0	2	50,50	0,1043
chrI	9537148	9538254	gesPSI:0.42561576	950	-	9537148	9538254	0	2	50,50	0,1056
chrIII	6412424	6412818	gesPSI:0.06796900	950	-	6412424	6412818	0	2	50,50	0,344
chrIII	6412424	6412524	gesPSI:0.93203100	950	-	6412424	6412524	0	2	50,50	0,50
chrX	4855005	4855369	gesPSI:0.09676944	950	-	4855005	4855369	0	2	50,50	0,314
chrX	4854823	4855369	gesPSI:0.09873331	950	-	4854823	4855369	0	2	50,50	0,496
chrX	4855161	4855369	gesPSI:0.80449725	950	-	4855161	4855369	0	2	50,50	0,158
chrII	6490832	6491036	gesPSI:0.86973617	950	+	6490832	6491036	0	2	50,50	0,154
chrII	6490891	6490991	gesPSI:0.13026383	950	+	6490891	6490991	0	2	50,50	0,50
chrV	9780372	9780671	gesPSI:0.21531303	950	-	9780372	9780671	0	2	50,50	0,249
chrV	9780366	9780671	gesPSI:0.51885787	950	-	9780366	9780671	0	2	50,50	0,255
chrV	9780219	9780671	gesPSI:0.26582910	950	-	9780219	9780671	0	2	50,50	0,402
chrII	4952342	4952696	gesPSI:0.17231315	950	+	4952342	4952696	0	2	50,50	0,304
chrII	4952342	4952889	gesPSI:0.49967633	950	+	4952342	4952889	0	2	50,50	0,497
chrII	4952342	4952539	gesPSI:0.11878520	950	+	4952342	4952539	0	2	50,50	0,147
chrII	6664461	6664607	gesPSI:0.75893939	950	+	6664461	6664607	0	2	50,50	0,96
chrII	6664507	6664607	gesPSI:0.24106061	950	+	6664507	6664607	0	2	50,50	0,50
chrV	10082635	10082794	gesPSI:0.35165692	950	-	10082635	10082794	0	2	50,50	0,109
chrV	10082626	10082794	gesPSI:0.25575049	950	-	10082626	10082794	0	2	50,50	0,118
chrV	10082644	10082794	gesPSI:0.39259259	950	-	10082644	10082794	0	2	50,50	0,100
chrIII	6937424	6938456	gesPSI:0.05238346	950	+	6937424	6938456	0	2	50,50	0,982
chrIII	6937424	6938461	gesPSI:0.70995022	950	+	6937424	6938461	0	2	50,50	0,987
chrIII	6937424	6937649	gesPSI:0.23766632	950	+	6937424	6937649	0	2	50,50	0,175
chrIV	10555199	10555343	gesPSI:0.58936877	950	+	10555199	10555343	0	2	50,50	0,94
chrIV	10555210	10555352	gesPSI:0.13803987	950	+	10555210	10555352	0	2	50,50	0,92
chrIV	10555199	10555352	gesPSI:0.27259136	950	+	10555199	10555352	0	2	50,50	0,103
chrIII	7091760	7092064	gesPSI:0.85743243	950	+	7091760	7092064	0	2	50,50	0,254
chrIII	7091964	7092064	gesPSI:0.14256757	950	+	7091964	7092064	0	2	50,50	0,50
chrIV	7110786	7110932	gesPSI:0.93767999	950	-	7110786	7110932	0	2	50,50	0,96
chrIV	7110795	7110895	gesPSI:0.06232001	950	-	7110795	7110895	0	2	50,50	0,50
chrII	7159562	7160443	gesPSI:0.25385565	950	+	7159562	7160443	0	2	50,50	0,831
chrII	7159583	7159683	gesPSI:0.74614435	950	+	7159583	7159683	0	2	50,50	0,50
chrV	11117486	11117651	gesPSI:0.08569427	950	+	11117486	11117651	0	2	50,50	0,115
chrV	11117486	11117648	gesPSI:0.49078157	950	+	11117486	11117648	0	2	50,50	0,112
chrV	11117495	11117648	gesPSI:0.42352417	950	+	11117495	11117648	0	2	50,50	0,103
chrI	5634185	5635691	gesPSI:0.06206257	950	+	5634185	5635691	0	2	50,50	0,1456
chrI	5634185	5636766	gesPSI:0.08977821	950	+	5634185	5636766	0	2	50,50	0,2531
chrI	5634185	5634452	gesPSI:0.84815922	950	+	5634185	5634452	0	2	50,50	0,217
chrI	5635642	5636766	gesPSI:0.10466922	950	+	5635642	5636766	0	2	50,50	0,1074
chrI	5635349	5636766	gesPSI:0.83152445	950	+	5635349	5636766	0	2	50,50	0,1367
chrIII	7518602	7518747	gesPSI:0.87764771	950	-	7518602	7518747	0	2	50,50	0,95
chrIII	7518647	7518747	gesPSI:0.12235229	950	-	7518647	7518747	0	2	50,50	0,50
chrX	7564280	7564465	gesPSI:0.21568105	950	+	7564280	7564465	0	2	50,50	0,135
chrX	7564358	7564458	gesPSI:0.78431895	950	+	7564358	7564458	0	2	50,50	0,50
chrIV	7792059	7792203	gesPSI:0.91680212	950	-	7792059	7792203	0	2	50,50	0,94
chrIV	7792059	7792159	gesPSI:0.08319788	950	-	7792059	7792159	0	2	50,50	0,50
chrII	5865463	5866362	gesPSI:0.07289318	950	+	5865463	5866362	0	2	50,50	0,849
chrII	5864921	5866362	gesPSI:0.45739466	950	+	5864921	5866362	0	2	50,50	0,1391
chrII	5866176	5866362	gesPSI:0.46971216	950	+	5866176	5866362	0	2	50,50	0,136
chrIII	5950159	5952090	gesPSI:0.36799620	950	+	5950159	5952090	0	2	50,50	0,1881
chrIII	5948941	5952090	gesPSI:0.46482669	950	+	5948941	5952090	0	2	50,50	0,3099
chrIII	5950447	5952090	gesPSI:0.16717711	950	+	5950447	5952090	0	2	50,50	0,1593
chrIV	5984930	5986568	gesPSI:0.06602639	950	+	5984930	5986568	0	2	50,50	0,1588
chrIV	5986305	5986568	gesPSI:0.64701399	950	+	5986305	5986568	0	2	50,50	0,213
chrIV	5985120	5986568	gesPSI:0.28695963	950	+	5985120	5986568	0	2	50,50	0,1398
chrX	8229529	8229869	gesPSI:0.13366504	950	-	8229529	8229869	0	2	50,50	0,290
chrX	8229671	8229771	gesPSI:0.86633496	950	-	8229671	8229771	0	2	50,50	0,50
chrII	12556407	12556552	gesPSI:0.79143051	950	+	12556407	12556552	0	2	50,50	0,95
chrII	12556407	12556547	gesPSI:0.07895477	950	+	12556407	12556547	0	2	50,50	0,90
chrII	12556407	12556559	gesPSI:0.12961471	950	+	12556407	12556559	0	2	50,50	0,102
chrIII	8774150	8774361	gesPSI:0.06711196	950	+	8774150	8774361	0	2	50,50	0,161
chrIII	8774150	8774250	gesPSI:0.93288804	950	+	8774150	8774250	0	2	50,50	0,50
chrX	8802338	8802712	gesPSI:0.08861237	950	-	8802338	8802712	0	2	50,50	0,324
chrX	8802588	8802688	gesPSI:0.91138763	950	-	8802588	8802688	0	2	50,50	0,50
chrIII	8847359	8848216	gesPSI:0.42562057	950	-	8847359	8848216	0	2	50,50	0,807
chrIII	8847353	8848216	gesPSI:0.40200355	950	-	8847353	8848216	0	2	50,50	0,813
chrIII	8847359	8847582	gesPSI:0.17237589	950	-	8847359	8847582	0	2	50,50	0,173
chrIV	8857395	8860595	gesPSI:0.49759797	950	+	8857395	8860595	0	2	50,50	0,3150
chrIV	8860148	8860595	gesPSI:0.15257139	950	+	8860148	8860595	0	2	50,50	0,397
chrIV	8857395	8860406	gesPSI:0.34983064	950	+	8857395	8860406	0	2	50,50	0,2961
chrIV	8863447	8863898	gesPSI:0.20665863	950	-	8863447	8863898	0	2	50,50	0,401
chrIV	8862435	8863898	gesPSI:0.58868953	950	-	8862435	8863898	0	2	50,50	0,1413
chrIV	8862451	8863898	gesPSI:0.20465184	950	-	8862451	8863898	0	2	50,50	0,1397
chrV	13407596	13407787	gesPSI:0.29957806	950	-	13407596	13407787	0	2	50,50	0,141
chrV	13407639	13407787	gesPSI:0.33916014	950	-	13407639	13407787	0	2	50,50	0,98
chrV	13407596	13407802	gesPSI:0.36126180	950	-	13407596	13407802	0	2	50,50	0,156
chrIV	13478059	13478207	gesPSI:0.64159061	950	-	13478059	13478207	0	2	50,50	0,98
chrIV	13478065	13478210	gesPSI:0.05382008	950	-	13478065	13478210	0	2	50,50	0,95
chrIV	13478065	13478207	gesPSI:0.30458931	950	-	13478065	13478207	0	2	50,50	0,92
chrV	9371821	9371972	gesPSI:0.88309589	950	-	9371821	9371972	0	2	50,50	0,101
chrV	9371872	9371972	gesPSI:0.11690411	950	-	9371872	9371972	0	2	50,50	0,50
chrV	14247620	14247827	gesPSI:0.79264091	950	-	14247620	14247827	0	2	50,50	0,157
chrV	14247620	14247944	gesPSI:0.07896874	950	-	14247620	14247944	0	2	50,50	0,274
chrV	14247620	14247917	gesPSI:0.12839035	950	-	14247620	14247917	0	2	50,50	0,247
chrIV	9651554	9651726	gesPSI:0.15643699	950	+	9651554	9651726	0	2	50,50	0,122
chrIV	9651626	9651726	gesPSI:0.84356301	950	+	9651626	9651726	0	2	50,50	0,50
chrX	7266880	7267055	gesPSI:0.65946421	950	+	7266880	7267055	0	2	50,50	0,125
chrX	7266880	7266980	gesPSI:0.34053579	950	+	7266880	7266980	0	2	50,50	0,50
chrIV	7443061	7443569	gesPSI:0.39539112	950	+	7443061	7443569	0	2	50,50	0,458
chrIV	7443177	7443569	gesPSI:0.31033805	950	+	7443177	7443569	0	2	50,50	0,342
chrIV	7442847	7443569	gesPSI:0.29427083	950	+	7442847	7443569	0	2	50,50	0,672
chrX	10094958	10095151	gesPSI:0.93824982	950	-	10094958	10095151	0	2	50,50	0,143
chrX	10094969	10095069	gesPSI:0.06175018	950	-	10094969	10095069	0	2	50,50	0,50
chrIV	10329145	10330720	gesPSI:0.22487570	950	-	10329145	10330720	0	2	50,50	0,1525
chrIV	10329151	10334176	gesPSI:0.43011619	950	-	10329151	10334176	0	2	50,50	0,4975
chrIV	10329145	10334176	gesPSI:0.11540241	950	-	10329145	10334176	0	2	50,50	0,4981
chrIV	10329151	10330720	gesPSI:0.22960570	950	-	10329151	10330720	0	2	50,50	0,1519
chrII	10570955	10571870	gesPSI:0.61946575	950	+	10570955	10571870	0	2	50,50	0,865
chrII	10570955	10571881	gesPSI:0.10336613	950	+	10570955	10571881	0	2	50,50	0,876
chrII	10570955	10571455	gesPSI:0.27716811	950	+	10570955	10571455	0	2	50,50	0,450
chrX	10580471	10580649	gesPSI:0.08851904	950	+	10580471	10580649	0	2	50,50	0,128
chrX	10580390	10580649	gesPSI:0.41131769	950	+	10580390	10580649	0	2	50,50	0,209
chrX	10580187	10580649	gesPSI:0.50016327	950	+	10580187	10580649	0	2	50,50	0,412
chrV	10786020	10786229	gesPSI:0.14490346	950	-	10786020	10786229	0	2	50,50	0,159
chrV	10786020	10786494	gesPSI:0.62141817	950	-	10786020	10786494	0	2	50,50	0,424
chrV	10786020	10786479	gesPSI:0.23367836	950	-	10786020	10786479	0	2	50,50	0,409
chrV	10787156	10787337	gesPSI:0.81602787	950	-	10787156	10787337	0	2	50,50	0,131
chrV	10787237	10787337	gesPSI:0.18397213	950	-	10787237	10787337	0	2	50,50	0,50
chrV	10888070	10888799	gesPSI:0.09623243	950	-	10888070	10888799	0	2	50,50	0,679
chrV	10888360	10888799	gesPSI:0.75183884	950	-	10888360	10888799	0	2	50,50	0,389
chrV	10888353	10888799	gesPSI:0.15192873	950	-	10888353	10888799	0	2	50,50	0,396
chrV	10956728	10956872	gesPSI:0.83493577	950	+	10956728	10956872	0	2	50,50	0,94
chrV	10956728	10956828	gesPSI:0.16506423	950	+	10956728	10956828	0	2	50,50	0,50
chrX	11021799	11021953	gesPSI:0.37697412	950	+	11021799	11021953	0	2	50,50	0,104
chrX	11021853	11021953	gesPSI:0.62302588	950	+	11021853	11021953	0	2	50,50	0,50
chrX	11022018	11022429	gesPSI:0.15870730	950	+	11022018	11022429	0	2	50,50	0,361
chrX	11021893	11022429	gesPSI:0.65014150	950	+	11021893	11022429	0	2	50,50	0,486
chrX	11022155	11022429	gesPSI:0.19115120	950	+	11022155	11022429	0	2	50,50	0,224
chrIV	11181654	11181806	gesPSI:0.08538819	950	+	11181654	11181806	0	2	50,50	0,102
chrIV	11181700	11181800	gesPSI:0.91461181	950	+	11181700	11181800	0	2	50,50	0,50
chrIV	11312008	11312209	gesPSI:0.08195194	950	+	11312008	11312209	0	2	50,50	0,151
chrIV	11312008	11312108	gesPSI:0.91804806	950	+	11312008	11312108	0	2	50,50	0,50
chrIV	11342986	11343366	gesPSI:0.09826133	950	-	11342986	11343366	0	2	50,50	0,330
chrIV	11342986	11345933	gesPSI:0.55984700	950	-	11342986	11345933	0	2	50,50	0,2897
chrIV	11342986	11343441	gesPSI:0.34189167	950	-	11342986	11343441	0	2	50,50	0,405
chrII	11454463	11454691	gesPSI:0.11869275	950	+	11454463	11454691	0	2	50,50	0,178
chrII	11454591	11454691	gesPSI:0.88130725	950	+	11454591	11454691	0	2	50,50	0,50
chrV	11632411	11632761	gesPSI:0.27537393	950	-	11632411	11632761	0	2	50,50	0,300
chrV	11632617	11632761	gesPSI:0.16266026	950	-	11632617	11632761	0	2	50,50	0,94
chrV	11632614	11632761	gesPSI:0.56196581	950	-	11632614	11632761	0	2	50,50	0,97
chrX	11708090	11708316	gesPSI:0.64882824	950	-	11708090	11708316	0	2	50,50	0,176
chrX	11708216	11708316	gesPSI:0.35117176	950	-	11708216	11708316	0	2	50,50	0,50
chrIV	11769604	11769888	gesPSI:0.12715893	950	-	11769604	11769888	0	2	50,50	0,234
chrIV	11769604	11769897	gesPSI:0.08662150	950	-	11769604	11769897	0	2	50,50	0,243
chrIV	11769604	11770079	gesPSI:0.78621957	950	-	11769604	11770079	0	2	50,50	0,425
chrV	11837490	11837685	gesPSI:0.08825249	950	+	11837490	11837685	0	2	50,50	0,145
chrV	11837494	11837800	gesPSI:0.64695871	950	+	11837494	11837800	0	2	50,50	0,256
chrV	11837523	11837685	gesPSI:0.26478880	950	+	11837523	11837685	0	2	50,50	0,112
chrX	11967356	11967623	gesPSI:0.12677804	950	+	11967356	11967623	0	2	50,50	0,217
chrX	11967360	11967460	gesPSI:0.87322196	950	+	11967360	11967460	0	2	50,50	0,50
chrII	12025963	12026314	gesPSI:0.14309376	950	-	12025963	12026314	0	2	50,50	0,301
chrII	12025963	12026571	gesPSI:0.11783527	950	-	12025963	12026571	0	2	50,50	0,558
chrII	12025963	12026181	gesPSI:0.73907097	950	-	12025963	12026181	0	2	50,50	0,168
chrIV	12059586	12059836	gesPSI:0.36011000	950	+	12059586	12059836	0	2	50,50	0,200
chrIV	12059736	12059836	gesPSI:0.63989000	950	+	12059736	12059836	0	2	50,50	0,50
chrII	9064224	9065233	gesPSI:0.65634263	950	-	9064224	9065233	0	2	50,50	0,959
chrII	9064224	9066105	gesPSI:0.13131222	950	-	9064224	9066105	0	2	50,50	0,1831
chrII	9064224	9065695	gesPSI:0.21234515	950	-	9064224	9065695	0	2	50,50	0,1421
chrII	9123286	9130997	gesPSI:0.60790216	950	+	9123286	9130997	0	2	50,50	0,7661
chrII	9127577	9130997	gesPSI:0.34149670	950	+	9127577	9130997	0	2	50,50	0,3370
chrII	9130839	9130997	gesPSI:0.05060114	950	+	9130839	9130997	0	2	50,50	0,108
chrV	9343746	9343995	gesPSI:0.24169756	950	-	9343746	9343995	0	2	50,50	0,199
chrV	9343895	9343995	gesPSI:0.75830244	950	-	9343895	9343995	0	2	50,50	0,50
chrX	12505261	12505868	gesPSI:0.15617821	950	-	12505261	12505868	0	2	50,50	0,557
chrX	12505222	12505656	gesPSI:0.38621650	950	-	12505222	12505656	0	2	50,50	0,384
chrX	12505261	12505656	gesPSI:0.45760529	950	-	12505261	12505656	0	2	50,50	0,345
chrV	9553475	9553675	gesPSI:0.44072855	950	+	9553475	9553675	0	2	50,50	0,150
chrV	9553475	9553831	gesPSI:0.36577427	950	+	9553475	9553831	0	2	50,50	0,306
chrV	9553475	9553984	gesPSI:0.19349718	950	+	9553475	9553984	0	2	50,50	0,459
chrV	9584412	9586233	gesPSI:0.32809765	950	+	9584412	9586233	0	2	50,50	0,1771
chrV	9583643	9586233	gesPSI:0.51530070	950	+	9583643	9586233	0	2	50,50	0,2540
chrV	9585106	9586233	gesPSI:0.15660165	950	+	9585106	9586233	0	2	50,50	0,1077
chrIII	13089299	13090844	gesPSI:0.09962255	950	-	13089299	13090844	0	2	50,50	0,1495
chrIII	13090727	13090827	gesPSI:0.90037745	950	-	13090727	13090827	0	2	50,50	0,50
chrIV	9922476	9924296	gesPSI:0.13374322	950	-	9922476	9924296	0	2	50,50	0,1770
chrIV	9922476	9923297	gesPSI:0.13120445	950	-	9922476	9923297	0	2	50,50	0,771
chrIV	9922476	9922625	gesPSI:0.73505233	950	-	9922476	9922625	0	2	50,50	0,99
chrI	13277283	13277487	gesPSI:0.76869501	950	-	13277283	13277487	0	2	50,50	0,154
chrI	13277387	13277487	gesPSI:0.23130499	950	-	13277387	13277487	0	2	50,50	0,50
chrI	10051554	10052254	gesPSI:0.23882483	950	-	10051554	10052254	0	2	50,50	0,650
chrI	10051554	10052457	gesPSI:0.15609059	950	-	10051554	10052457	0	2	50,50	0,853
chrI	10051554	10052045	gesPSI:0.60508458	950	-	10051554	10052045	0	2	50,50	0,441
chrV	13416760	13416908	gesPSI:0.08791866	950	-	13416760	13416908	0	2	50,50	0,98
chrV	13416760	13416860	gesPSI:0.91208134	950	-	13416760	13416860	0	2	50,50	0,50
chrV	13727870	13728749	gesPSI:0.23415745	950	-	13727870	13728749	0	2	50,50	0,829
chrV	13727870	13728521	gesPSI:0.21959754	950	-	13727870	13728521	0	2	50,50	0,601
chrV	13727870	13728641	gesPSI:0.54624501	950	-	13727870	13728641	0	2	50,50	0,721
chrV	13964771	13964987	gesPSI:0.21495144	950	+	13964771	13964987	0	2	50,50	0,166
chrV	13964548	13964987	gesPSI:0.24878893	950	+	13964548	13964987	0	2	50,50	0,389
chrV	13964548	13964981	gesPSI:0.53625963	950	+	13964548	13964981	0	2	50,50	0,383
chrV	11194009	11194623	gesPSI:0.47297057	950	-	11194009	11194623	0	2	50,50	0,564
chrV	11194009	11194256	gesPSI:0.10298338	950	-	11194009	11194256	0	2	50,50	0,197
chrV	11194009	11194252	gesPSI:0.11199516	950	-	11194009	11194252	0	2	50,50	0,193
chrV	11194009	11194823	gesPSI:0.31205089	950	-	11194009	11194823	0	2	50,50	0,764
chrI	15001338	15001624	gesPSI:0.59354008	950	+	15001338	15001624	0	2	50,50	0,236
chrI	15001524	15001624	gesPSI:0.40645992	950	+	15001524	15001624	0	2	50,50	0,50
chrX	11512749	11512895	gesPSI:0.17939475	950	-	11512749	11512895	0	2	50,50	0,96
chrX	11512749	11514740	gesPSI:0.33831138	950	-	11512749	11514740	0	2	50,50	0,1941
chrX	11512749	11516786	gesPSI:0.48229388	950	-	11512749	11516786	0	2	50,50	0,3987
chrV	15476211	15476360	gesPSI:0.65191740	950	-	15476211	15476360	0	2	50,50	0,99
chrV	15476242	15476342	gesPSI:0.34808260	950	-	15476242	15476342	0	2	50,50	0,50
chrX	16930258	16930506	gesPSI:0.21048566	950	+	16930258	16930506	0	2	50,50	0,198
chrX	16930406	16930506	gesPSI:0.78951434	950	+	16930406	16930506	0	2	50,50	0,50
chrIII	13050195	13050639	gesPSI:0.80994502	950	-	13050195	13050639	0	2	50,50	0,394
chrIII	13050302	13050639	gesPSI:0.19005498	950	-	13050302	13050639	0	2	50,50	0,287
chrX	13155428	13161387	gesPSI:0.16321448	950	-	13155428	13161387	0	2	50,50	0,5909
chrX	13155428	13169726	gesPSI:0.10762771	950	-	13155428	13169726	0	2	50,50	0,14248
chrX	13155428	13155630	gesPSI:0.72915781	950	-	13155428	13155630	0	2	50,50	0,152
chrV	19438580	19438726	gesPSI:0.47848700	950	-	19438580	19438726	0	2	50,50	0,96
chrV	19438626	19438726	gesPSI:0.52151300	950	-	19438626	19438726	0	2	50,50	0,50
chrI	14621546	14622353	gesPSI:0.08615001	950	-	14621546	14622353	0	2	50,50	0,757
chrI	14621546	14622707	gesPSI:0.06572533	950	-	14621546	14622707	0	2	50,50	0,1111
chrI	14621546	14622877	gesPSI:0.84812466	950	-	14621546	14622877	0	2	50,50	0,1281
chrV	19535105	19537484	gesPSI:0.23062996	950	-	19535105	19537484	0	2	50,50	0,2329
chrV	19535105	19535817	gesPSI:0.13269570	950	-	19535105	19535817	0	2	50,50	0,662
chrV	19535105	19535932	gesPSI:0.63667435	950	-	19535105	19535932	0	2	50,50	0,777
chrI	14878943	14881101	gesPSI:0.61235103	950	-	14878943	14881101	0	2	50,50	0,2108
chrI	14878943	14880064	gesPSI:0.23441696	950	-	14878943	14880064	0	2	50,50	0,1071
chrI	14878943	14880659	gesPSI:0.15323201	950	-	14878943	14880659	0	2	50,50	0,1666
chrX	15270698	15271276	gesPSI:0.33547145	950	-	15270698	15271276	0	2	50,50	0,528
chrX	15269676	15271276	gesPSI:0.58455925	950	-	15269676	15271276	0	2	50,50	0,1550
chrX	15271073	15271276	gesPSI:0.07996930	950	-	15271073	15271276	0	2	50,50	0,153
chrIII	13765976	13766149	gesPSI:0.18302899	950	-	13765976	13766149	0	2	50,50	0,123
chrIII	13765976	13768074	gesPSI:0.43586561	950	-	13765976	13768074	0	2	50,50	0,2048
chrIII	13765976	13767785	gesPSI:0.14246299	950	-	13765976	13767785	0	2	50,50	0,1759
chrIII	13765976	13766945	gesPSI:0.23864241	950	-	13765976	13766945	0	2	50,50	0,919
chrX	17677194	17678979	gesPSI:0.07830305	950	+	17677194	17678979	0	2	50,50	0,1735
chrX	17677194	17679971	gesPSI:0.13148286	950	+	17677194	17679971	0	2	50,50	0,2727
chrX	17677194	17678720	gesPSI:0.79021409	950	+	17677194	17678720	0	2	50,50	0,1476
chrX	17679619	17679971	gesPSI:0.31936159	950	+	17679619	17679971	0	2	50,50	0,302
chrX	17678722	17679971	gesPSI:0.35862653	950	+	17678722	17679971	0	2	50,50	0,1199
chrX	17679269	17679971	gesPSI:0.26858898	950	+	17679269	17679971	0	2	50,50	0,652
chrV	18661127	18662408	gesPSI:0.65622554	950	-	18661127	18662408	0	2	50,50	0,1231
chrV	18661661	18662408	gesPSI:0.11767650	950	-	18661661	18662408	0	2	50,50	0,697
chrV	18662263	18662408	gesPSI:0.22609796	950	-	18662263	18662408	0	2	50,50	0,95
chrV	18661127	18662168	gesPSI:0.10739818	950	-	18661127	18662168	0	2	50,50	0,991
chrV	18661127	18661671	gesPSI:0.33239620	950	-	18661127	18661671	0	2	50,50	0,494
chrV	18661127	18662666	gesPSI:0.12425860	950	-	18661127	18662666	0	2	50,50	0,1489

## Sheet: Neuron_AltSplicing
Neuron: alternative splicing events
Cassette
track name=neuro_cassette description='neuro_cassette'
chrV	38219	40503	neuroPSI:0.77690075	950	+	38219	40503	0	2	50,50	0,2234
chrV	38219	39040	neuroPSI:0.22309925	950	+	38219	39040	0	2	50,50	0,771
chrV	38976	40503	neuroPSI:0.24094664	950	+	38976	40503	0	2	50,50	0,1477
chrI	77749	78202	neuroPSI:0.06242516	950	+	77749	78202	0	2	50,50	0,403
chrI	77749	79362	neuroPSI:0.93757484	950	+	77749	79362	0	2	50,50	0,1563
chrI	78120	79362	neuroPSI:0.07418682	950	+	78120	79362	0	2	50,50	0,1192
chrII	96757	97108	neuroPSI:0.73709998	950	-	96757	97108	0	2	50,50	0,301
chrII	96959	97108	neuroPSI:0.26290002	950	-	96959	97108	0	2	50,50	0,99
chrII	96757	96930	neuroPSI:0.19880906	950	-	96757	96930	0	2	50,50	0,123
chrII	167028	167223	neuroPSI:0.52393638	950	+	167028	167223	0	2	50,50	0,145
chrII	167028	167953	neuroPSI:0.47606362	950	+	167028	167953	0	2	50,50	0,875
chrII	167336	167953	neuroPSI:0.66324536	950	+	167336	167953	0	2	50,50	0,567
chrII	223747	227985	neuroPSI:0.79614359	950	-	223747	227985	0	2	50,50	0,4188
chrII	226724	227985	neuroPSI:0.20385641	950	-	226724	227985	0	2	50,50	0,1211
chrII	223747	226663	neuroPSI:0.27874251	950	-	223747	226663	0	2	50,50	0,2866
chrIII	232394	234762	neuroPSI:0.89950180	950	+	232394	234762	0	2	50,50	0,2318
chrIII	232394	234968	neuroPSI:0.10049820	950	+	232394	234968	0	2	50,50	0,2524
chrIII	234724	234968	neuroPSI:0.88757379	950	+	234724	234968	0	2	50,50	0,194
chrV	277319	278224	neuroPSI:0.08406765	950	-	277319	278224	0	2	50,50	0,855
chrV	277990	278224	neuroPSI:0.91593235	950	-	277990	278224	0	2	50,50	0,184
chrV	277319	278016	neuroPSI:0.90434270	950	-	277319	278016	0	2	50,50	0,647
chrI	286947	287558	neuroPSI:0.52855657	950	-	286947	287558	0	2	50,50	0,561
chrI	286370	287558	neuroPSI:0.47144343	950	-	286370	287558	0	2	50,50	0,1138
chrI	286370	286923	neuroPSI:0.50241435	950	-	286370	286923	0	2	50,50	0,503
chrIII	338006	338345	neuroPSI:0.23966318	950	-	338006	338345	0	2	50,50	0,289
chrIII	336961	338345	neuroPSI:0.76033682	950	-	336961	338345	0	2	50,50	0,1334
chrIII	336961	338004	neuroPSI:0.26879579	950	-	336961	338004	0	2	50,50	0,993
chrIII	345808	346338	neuroPSI:0.71786234	950	-	345808	346338	0	2	50,50	0,480
chrIII	346059	346338	neuroPSI:0.28213766	950	-	346059	346338	0	2	50,50	0,229
chrIII	345808	346072	neuroPSI:0.27818704	950	-	345808	346072	0	2	50,50	0,214
chrIII	347859	348094	neuroPSI:0.16720430	950	-	347859	348094	0	2	50,50	0,185
chrIII	347387	348094	neuroPSI:0.83279570	950	-	347387	348094	0	2	50,50	0,657
chrIII	347387	347890	neuroPSI:0.15948883	950	-	347387	347890	0	2	50,50	0,453
chrIII	410356	410597	neuroPSI:0.77071429	950	-	410356	410597	0	2	50,50	0,191
chrIII	409946	410597	neuroPSI:0.22928571	950	-	409946	410597	0	2	50,50	0,601
chrIII	409946	410396	neuroPSI:0.81905968	950	-	409946	410396	0	2	50,50	0,400
chrV	532626	533023	neuroPSI:0.84191994	950	+	532626	533023	0	2	50,50	0,347
chrV	532626	533353	neuroPSI:0.15808006	950	+	532626	533353	0	2	50,50	0,677
chrV	533198	533353	neuroPSI:0.92077130	950	+	533198	533353	0	2	50,50	0,105
chrIV	550604	550816	neuroPSI:0.35883528	950	+	550604	550816	0	2	50,50	0,162
chrIV	550604	551984	neuroPSI:0.64116472	950	+	550604	551984	0	2	50,50	0,1330
chrIV	550836	551984	neuroPSI:0.34201056	950	+	550836	551984	0	2	50,50	0,1098
chrX	612334	612757	neuroPSI:0.21196352	950	-	612334	612757	0	2	50,50	0,373
chrX	611565	612757	neuroPSI:0.78803648	950	-	611565	612757	0	2	50,50	0,1142
chrX	611565	612404	neuroPSI:0.20982413	950	-	611565	612404	0	2	50,50	0,789
chrX	722228	722385	neuroPSI:0.73559552	950	-	722228	722385	0	2	50,50	0,107
chrX	720873	722385	neuroPSI:0.26440448	950	-	720873	722385	0	2	50,50	0,1462
chrX	720873	722202	neuroPSI:0.73414945	950	-	720873	722202	0	2	50,50	0,1279
chrX	725541	725756	neuroPSI:0.35528828	950	-	725541	725756	0	2	50,50	0,165
chrX	725217	725756	neuroPSI:0.64471172	950	-	725217	725756	0	2	50,50	0,489
chrX	725217	725590	neuroPSI:0.43116265	950	-	725217	725590	0	2	50,50	0,323
chrIII	729408	729629	neuroPSI:0.48773940	950	-	729408	729629	0	2	50,50	0,171
chrIII	729143	729629	neuroPSI:0.51226060	950	-	729143	729629	0	2	50,50	0,436
chrIII	729143	729367	neuroPSI:0.51452670	950	-	729143	729367	0	2	50,50	0,174
chrIII	781005	781673	neuroPSI:0.56000115	950	-	781005	781673	0	2	50,50	0,618
chrIII	780808	781673	neuroPSI:0.43999885	950	-	780808	781673	0	2	50,50	0,815
chrIII	780808	781027	neuroPSI:0.54540622	950	-	780808	781027	0	2	50,50	0,169
chrIII	818566	818719	neuroPSI:0.91259058	950	+	818566	818719	0	2	50,50	0,103
chrIII	818566	819027	neuroPSI:0.08740942	950	+	818566	819027	0	2	50,50	0,411
chrIII	818721	819027	neuroPSI:0.91221876	950	+	818721	819027	0	2	50,50	0,256
chrIII	882162	883640	neuroPSI:0.49333948	950	-	882162	883640	0	2	50,50	0,1428
chrIII	882008	883640	neuroPSI:0.50666052	950	-	882008	883640	0	2	50,50	0,1582
chrIII	882008	882155	neuroPSI:0.49194635	950	-	882008	882155	0	2	50,50	0,97
chrIII	1008791	1008940	neuroPSI:0.75573593	950	+	1008791	1008940	0	2	50,50	0,99
chrIII	1008791	1009548	neuroPSI:0.24426407	950	+	1008791	1009548	0	2	50,50	0,707
chrIII	1008982	1009548	neuroPSI:0.71426799	950	+	1008982	1009548	0	2	50,50	0,516
chrIV	1012907	1013124	neuroPSI:0.08483575	950	+	1012907	1013124	0	2	50,50	0,167
chrIV	1012907	1013381	neuroPSI:0.91516425	950	+	1012907	1013381	0	2	50,50	0,424
chrIV	1013090	1013381	neuroPSI:0.08286344	950	+	1013090	1013381	0	2	50,50	0,241
chrX	1174557	1174935	neuroPSI:0.58890051	950	+	1174557	1174935	0	2	50,50	0,328
chrX	1174557	1175218	neuroPSI:0.41109949	950	+	1174557	1175218	0	2	50,50	0,611
chrX	1175003	1175218	neuroPSI:0.61720838	950	+	1175003	1175218	0	2	50,50	0,165
chrIII	1217759	1219436	neuroPSI:0.23721313	950	-	1217759	1219436	0	2	50,50	0,1627
chrIII	1218742	1219436	neuroPSI:0.76278687	950	-	1218742	1219436	0	2	50,50	0,644
chrIII	1217759	1218766	neuroPSI:0.73652807	950	-	1217759	1218766	0	2	50,50	0,957
chrIV	1568405	1569520	neuroPSI:0.86053587	950	-	1568405	1569520	0	2	50,50	0,1065
chrIV	1569008	1569520	neuroPSI:0.13946413	950	-	1569008	1569520	0	2	50,50	0,462
chrIV	1568405	1569087	neuroPSI:0.17101074	950	-	1568405	1569087	0	2	50,50	0,632
chrX	1611819	1612555	neuroPSI:0.62096243	950	+	1611819	1612555	0	2	50,50	0,686
chrX	1611819	1613220	neuroPSI:0.37903757	950	+	1611819	1613220	0	2	50,50	0,1351
chrX	1612512	1613220	neuroPSI:0.60294118	950	+	1612512	1613220	0	2	50,50	0,658
chrIII	1830557	1830715	neuroPSI:0.22777778	950	+	1830557	1830715	0	2	50,50	0,108
chrIII	1830557	1830836	neuroPSI:0.77222222	950	+	1830557	1830836	0	2	50,50	0,229
chrIII	1830682	1830836	neuroPSI:0.15788370	950	+	1830682	1830836	0	2	50,50	0,104
chrIII	1841860	1842919	neuroPSI:0.75414431	950	+	1841860	1842919	0	2	50,50	0,1009
chrIII	1841860	1844422	neuroPSI:0.24585569	950	+	1841860	1844422	0	2	50,50	0,2512
chrIII	1843053	1844422	neuroPSI:0.81177819	950	+	1843053	1844422	0	2	50,50	0,1319
chrIII	1932324	1933247	neuroPSI:0.75767196	950	+	1932324	1933247	0	2	50,50	0,873
chrIII	1932324	1934233	neuroPSI:0.24232804	950	+	1932324	1934233	0	2	50,50	0,1859
chrIII	1933252	1934233	neuroPSI:0.81587886	950	+	1933252	1934233	0	2	50,50	0,931
chrX	2029391	2029640	neuroPSI:0.28431373	950	+	2029391	2029640	0	2	50,50	0,199
chrX	2029391	2029534	neuroPSI:0.71568627	950	+	2029391	2029534	0	2	50,50	0,93
chrX	2029491	2029640	neuroPSI:0.71906117	950	+	2029491	2029640	0	2	50,50	0,99
chrX	2068702	2069739	neuroPSI:0.44516908	950	-	2068702	2069739	0	2	50,50	0,987
chrX	2069538	2069739	neuroPSI:0.55483092	950	-	2069538	2069739	0	2	50,50	0,151
chrX	2068702	2069575	neuroPSI:0.60037879	950	-	2068702	2069575	0	2	50,50	0,823
chrI	2370120	2371146	neuroPSI:0.87603306	950	+	2370120	2371146	0	2	50,50	0,976
chrI	2370120	2370509	neuroPSI:0.12396694	950	+	2370120	2370509	0	2	50,50	0,339
chrI	2370590	2371146	neuroPSI:0.14866434	950	+	2370590	2371146	0	2	50,50	0,506
chrIII	2398535	2400730	neuroPSI:0.90197181	950	-	2398535	2400730	0	2	50,50	0,2145
chrIII	2395918	2400730	neuroPSI:0.09802819	950	-	2395918	2400730	0	2	50,50	0,4762
chrIII	2395918	2398440	neuroPSI:0.92591965	950	-	2395918	2398440	0	2	50,50	0,2472
chrX	2446933	2448811	neuroPSI:0.17326656	950	-	2446933	2448811	0	2	50,50	0,1828
chrX	2447488	2448811	neuroPSI:0.82673344	950	-	2447488	2448811	0	2	50,50	0,1273
chrX	2446933	2447392	neuroPSI:0.88022446	950	-	2446933	2447392	0	2	50,50	0,409
chrIII	2556628	2557672	neuroPSI:0.71955226	950	+	2556628	2557672	0	2	50,50	0,994
chrIII	2556628	2556986	neuroPSI:0.28044774	950	+	2556628	2556986	0	2	50,50	0,308
chrIII	2556949	2557672	neuroPSI:0.31614270	950	+	2556949	2557672	0	2	50,50	0,673
chrIV	2596212	2596506	neuroPSI:0.44741935	950	+	2596212	2596506	0	2	50,50	0,244
chrIV	2596212	2596364	neuroPSI:0.55258065	950	+	2596212	2596364	0	2	50,50	0,102
chrIV	2596316	2596506	neuroPSI:0.73698445	950	+	2596316	2596506	0	2	50,50	0,140
chrI	2614439	2614846	neuroPSI:0.27500466	950	+	2614439	2614846	0	2	50,50	0,357
chrI	2614439	2615126	neuroPSI:0.72499534	950	+	2614439	2615126	0	2	50,50	0,637
chrI	2614769	2615126	neuroPSI:0.26386897	950	+	2614769	2615126	0	2	50,50	0,307
chrIV	2712604	2712944	neuroPSI:0.86579690	950	-	2712604	2712944	0	2	50,50	0,290
chrIV	2712125	2712944	neuroPSI:0.13420310	950	-	2712125	2712944	0	2	50,50	0,769
chrIV	2712125	2712640	neuroPSI:0.88034822	950	-	2712125	2712640	0	2	50,50	0,465
chrIII	2749060	2750064	neuroPSI:0.41676867	950	-	2749060	2750064	0	2	50,50	0,954
chrIII	2749271	2750064	neuroPSI:0.58323133	950	-	2749271	2750064	0	2	50,50	0,743
chrIII	2749060	2749209	neuroPSI:0.67562523	950	-	2749060	2749209	0	2	50,50	0,99
chrX	2810850	2811585	neuroPSI:0.92373209	950	-	2810850	2811585	0	2	50,50	0,685
chrX	2811235	2811585	neuroPSI:0.07626791	950	-	2811235	2811585	0	2	50,50	0,300
chrX	2810850	2811205	neuroPSI:0.08894118	950	-	2810850	2811205	0	2	50,50	0,305
chrIV	2962559	2962786	neuroPSI:0.35161833	950	+	2962559	2962786	0	2	50,50	0,177
chrIV	2962559	2963861	neuroPSI:0.64838167	950	+	2962559	2963861	0	2	50,50	0,1252
chrIV	2962731	2963861	neuroPSI:0.35399941	950	+	2962731	2963861	0	2	50,50	0,1080
chrX	3037313	3037498	neuroPSI:0.23909043	950	-	3037313	3037498	0	2	50,50	0,135
chrX	3037013	3037498	neuroPSI:0.76090957	950	-	3037013	3037498	0	2	50,50	0,435
chrX	3037013	3037357	neuroPSI:0.22142966	950	-	3037013	3037357	0	2	50,50	0,294
chrX	3109831	3109991	neuroPSI:0.88951581	950	-	3109831	3109991	0	2	50,50	0,110
chrX	3109638	3109991	neuroPSI:0.11048419	950	-	3109638	3109991	0	2	50,50	0,303
chrX	3109638	3109853	neuroPSI:0.90522716	950	-	3109638	3109853	0	2	50,50	0,165
chrIII	3115583	3116199	neuroPSI:0.88587849	950	-	3115583	3116199	0	2	50,50	0,566
chrIII	3114952	3116199	neuroPSI:0.11412151	950	-	3114952	3116199	0	2	50,50	0,1197
chrIII	3114952	3115592	neuroPSI:0.91257193	950	-	3114952	3115592	0	2	50,50	0,590
chrX	3162200	3163862	neuroPSI:0.91631233	950	+	3162200	3163862	0	2	50,50	0,1612
chrX	3162200	3162854	neuroPSI:0.08368767	950	+	3162200	3162854	0	2	50,50	0,604
chrX	3163027	3163862	neuroPSI:0.08531353	950	+	3163027	3163862	0	2	50,50	0,785
chrIV	3240399	3241606	neuroPSI:0.23027645	950	+	3240399	3241606	0	2	50,50	0,1157
chrIV	3240399	3243504	neuroPSI:0.76972355	950	+	3240399	3243504	0	2	50,50	0,3055
chrIV	3241566	3243504	neuroPSI:0.23065986	950	+	3241566	3243504	0	2	50,50	0,1888
chrIII	3293757	3294180	neuroPSI:0.11603448	950	-	3293757	3294180	0	2	50,50	0,373
chrIII	3294011	3294180	neuroPSI:0.88396552	950	-	3294011	3294180	0	2	50,50	0,119
chrIII	3293757	3293945	neuroPSI:0.87092253	950	-	3293757	3293945	0	2	50,50	0,138
chrIII	3420394	3421945	neuroPSI:0.54151404	950	+	3420394	3421945	0	2	50,50	0,1501
chrIII	3420394	3421174	neuroPSI:0.45848596	950	+	3420394	3421174	0	2	50,50	0,730
chrIII	3421158	3421945	neuroPSI:0.45995671	950	+	3421158	3421945	0	2	50,50	0,737
chrI	3506190	3507139	neuroPSI:0.44974745	950	+	3506190	3507139	0	2	50,50	0,899
chrI	3506190	3508271	neuroPSI:0.55025255	950	+	3506190	3508271	0	2	50,50	0,2031
chrI	3507114	3508271	neuroPSI:0.38181000	950	+	3507114	3508271	0	2	50,50	0,1107
chrX	3578257	3578706	neuroPSI:0.88392219	950	+	3578257	3578706	0	2	50,50	0,399
chrX	3578257	3578595	neuroPSI:0.11607781	950	+	3578257	3578595	0	2	50,50	0,288
chrX	3578553	3578706	neuroPSI:0.11034689	950	+	3578553	3578706	0	2	50,50	0,103
chrIV	3804037	3804537	neuroPSI:0.14668130	950	+	3804037	3804537	0	2	50,50	0,450
chrIV	3804037	3804181	neuroPSI:0.85331870	950	+	3804037	3804181	0	2	50,50	0,94
chrIV	3804254	3804537	neuroPSI:0.87256018	950	+	3804254	3804537	0	2	50,50	0,233
chrI	3828391	3828540	neuroPSI:0.61378096	950	+	3828391	3828540	0	2	50,50	0,99
chrI	3828440	3828950	neuroPSI:0.38621904	950	+	3828440	3828950	0	2	50,50	0,460
chrI	3828639	3828950	neuroPSI:0.64687923	950	+	3828639	3828950	0	2	50,50	0,261
chrIII	3846294	3847048	neuroPSI:0.33780568	950	+	3846294	3847048	0	2	50,50	0,704
chrIII	3846294	3846548	neuroPSI:0.66219432	950	+	3846294	3846548	0	2	50,50	0,204
chrIII	3846832	3847048	neuroPSI:0.79086362	950	+	3846832	3847048	0	2	50,50	0,166
chrII	3934511	3934664	neuroPSI:0.12193896	950	+	3934511	3934664	0	2	50,50	0,103
chrII	3934511	3934809	neuroPSI:0.87806104	950	+	3934511	3934809	0	2	50,50	0,248
chrII	3934663	3934809	neuroPSI:0.15382072	950	+	3934663	3934809	0	2	50,50	0,96
chrII	4014382	4015299	neuroPSI:0.07499523	950	+	4014382	4015299	0	2	50,50	0,867
chrII	4014382	4014991	neuroPSI:0.92500477	950	+	4014382	4014991	0	2	50,50	0,559
chrII	4015033	4015299	neuroPSI:0.93165947	950	+	4015033	4015299	0	2	50,50	0,216
chrX	4058211	4059173	neuroPSI:0.54598365	950	-	4058211	4059173	0	2	50,50	0,912
chrX	4058783	4059173	neuroPSI:0.45401635	950	-	4058783	4059173	0	2	50,50	0,340
chrX	4058211	4058861	neuroPSI:0.47244936	950	-	4058211	4058861	0	2	50,50	0,600
chrII	4085311	4085983	neuroPSI:0.65231900	950	+	4085311	4085983	0	2	50,50	0,622
chrII	4085311	4085496	neuroPSI:0.34768100	950	+	4085311	4085496	0	2	50,50	0,135
chrII	4085477	4085983	neuroPSI:0.45902867	950	+	4085477	4085983	0	2	50,50	0,456
chrIII	4143135	4143991	neuroPSI:0.66644062	950	+	4143135	4143991	0	2	50,50	0,806
chrIII	4143135	4144628	neuroPSI:0.33355938	950	+	4143135	4144628	0	2	50,50	0,1443
chrIII	4144122	4144628	neuroPSI:0.74149438	950	+	4144122	4144628	0	2	50,50	0,456
chrIV	4178506	4178785	neuroPSI:0.67552320	950	+	4178506	4178785	0	2	50,50	0,229
chrIV	4178506	4179312	neuroPSI:0.32447680	950	+	4178506	4179312	0	2	50,50	0,756
chrIV	4178959	4179312	neuroPSI:0.79357468	950	+	4178959	4179312	0	2	50,50	0,303
chrI	4206413	4206587	neuroPSI:0.13988527	950	+	4206413	4206587	0	2	50,50	0,124
chrI	4206413	4207004	neuroPSI:0.86011473	950	+	4206413	4207004	0	2	50,50	0,541
chrI	4206580	4207004	neuroPSI:0.09899974	950	+	4206580	4207004	0	2	50,50	0,374
chrIV	4214947	4216113	neuroPSI:0.07687767	950	+	4214947	4216113	0	2	50,50	0,1116
chrIV	4214947	4216611	neuroPSI:0.92312233	950	+	4214947	4216611	0	2	50,50	0,1614
chrIV	4216327	4216611	neuroPSI:0.07786358	950	+	4216327	4216611	0	2	50,50	0,234
chrI	4231175	4232545	neuroPSI:0.73983918	950	+	4231175	4232545	0	2	50,50	0,1320
chrI	4231175	4231623	neuroPSI:0.26016082	950	+	4231175	4231623	0	2	50,50	0,398
chrI	4231712	4232545	neuroPSI:0.34579146	950	+	4231712	4232545	0	2	50,50	0,783
chrX	4273020	4273199	neuroPSI:0.92757986	950	-	4273020	4273199	0	2	50,50	0,129
chrX	4272944	4273199	neuroPSI:0.07242014	950	-	4272944	4273199	0	2	50,50	0,205
chrX	4272944	4273084	neuroPSI:0.92718783	950	-	4272944	4273084	0	2	50,50	0,90
chrIII	4313930	4314855	neuroPSI:0.84722728	950	+	4313930	4314855	0	2	50,50	0,875
chrIII	4313930	4315371	neuroPSI:0.15277272	950	+	4313930	4315371	0	2	50,50	0,1391
chrIII	4314914	4315371	neuroPSI:0.91169827	950	+	4314914	4315371	0	2	50,50	0,407
chrX	4330465	4330624	neuroPSI:0.79970760	950	-	4330465	4330624	0	2	50,50	0,109
chrX	4330272	4330624	neuroPSI:0.20029240	950	-	4330272	4330624	0	2	50,50	0,302
chrX	4330272	4330534	neuroPSI:0.81073858	950	-	4330272	4330534	0	2	50,50	0,212
chrX	4390039	4390881	neuroPSI:0.83378322	950	+	4390039	4390881	0	2	50,50	0,792
chrX	4390039	4391088	neuroPSI:0.16621678	950	+	4390039	4391088	0	2	50,50	0,999
chrX	4390799	4391088	neuroPSI:0.84172920	950	+	4390799	4391088	0	2	50,50	0,239
chrX	4413402	4413967	neuroPSI:0.58380198	950	-	4413402	4413967	0	2	50,50	0,515
chrX	4412406	4413967	neuroPSI:0.41619802	950	-	4412406	4413967	0	2	50,50	0,1511
chrX	4412406	4413328	neuroPSI:0.70882536	950	-	4412406	4413328	0	2	50,50	0,872
chrII	4468433	4469501	neuroPSI:0.43487395	950	+	4468433	4469501	0	2	50,50	0,1018
chrII	4468433	4469133	neuroPSI:0.56512605	950	+	4468433	4469133	0	2	50,50	0,650
chrII	4469224	4469501	neuroPSI:0.64512338	950	+	4469224	4469501	0	2	50,50	0,227
chrII	4491729	4492254	neuroPSI:0.14763556	950	-	4491729	4492254	0	2	50,50	0,475
chrII	4492070	4492254	neuroPSI:0.85236444	950	-	4492070	4492254	0	2	50,50	0,134
chrII	4491729	4492136	neuroPSI:0.85814767	950	-	4491729	4492136	0	2	50,50	0,357
chrX	4519403	4519570	neuroPSI:0.14987669	950	-	4519403	4519570	0	2	50,50	0,117
chrX	4518635	4519570	neuroPSI:0.85012331	950	-	4518635	4519570	0	2	50,50	0,885
chrX	4518635	4519401	neuroPSI:0.16415881	950	-	4518635	4519401	0	2	50,50	0,716
chrII	4587198	4589058	neuroPSI:0.35175754	950	+	4587198	4589058	0	2	50,50	0,1810
chrII	4587198	4588188	neuroPSI:0.64824246	950	+	4587198	4588188	0	2	50,50	0,940
chrII	4588187	4589058	neuroPSI:0.65004105	950	+	4588187	4589058	0	2	50,50	0,821
chrV	4643995	4645401	neuroPSI:0.82494947	950	+	4643995	4645401	0	2	50,50	0,1356
chrV	4643995	4644658	neuroPSI:0.17505053	950	+	4643995	4644658	0	2	50,50	0,613
chrV	4644834	4645401	neuroPSI:0.28989362	950	+	4644834	4645401	0	2	50,50	0,517
chrV	4804389	4805488	neuroPSI:0.40168003	950	-	4804389	4805488	0	2	50,50	0,1049
chrV	4805166	4805488	neuroPSI:0.59831997	950	-	4805166	4805488	0	2	50,50	0,272
chrV	4804389	4805200	neuroPSI:0.62192513	950	-	4804389	4805200	0	2	50,50	0,761
chrIII	5010939	5011522	neuroPSI:0.66426928	950	-	5010939	5011522	0	2	50,50	0,533
chrIII	5011266	5011522	neuroPSI:0.33573072	950	-	5011266	5011522	0	2	50,50	0,206
chrIII	5010939	5011189	neuroPSI:0.39782731	950	-	5010939	5011189	0	2	50,50	0,200
chrV	5059499	5059962	neuroPSI:0.21429636	950	-	5059499	5059962	0	2	50,50	0,413
chrV	5059813	5059962	neuroPSI:0.78570364	950	-	5059813	5059962	0	2	50,50	0,99
chrV	5059499	5059856	neuroPSI:0.79374138	950	-	5059499	5059856	0	2	50,50	0,307
chrIII	5256708	5256907	neuroPSI:0.68686869	950	+	5256708	5256907	0	2	50,50	0,149
chrIII	5256708	5257054	neuroPSI:0.31313131	950	+	5256708	5257054	0	2	50,50	0,296
chrIII	5256867	5257054	neuroPSI:0.70268942	950	+	5256867	5257054	0	2	50,50	0,137
chrII	5338306	5338789	neuroPSI:0.86361246	950	+	5338306	5338789	0	2	50,50	0,433
chrII	5338306	5339124	neuroPSI:0.13638754	950	+	5338306	5339124	0	2	50,50	0,768
chrII	5338964	5339124	neuroPSI:0.90494435	950	+	5338964	5339124	0	2	50,50	0,110
chrII	5387899	5388476	neuroPSI:0.93716934	950	-	5387899	5388476	0	2	50,50	0,527
chrII	5388285	5388476	neuroPSI:0.06283066	950	-	5388285	5388476	0	2	50,50	0,141
chrII	5387899	5388199	neuroPSI:0.06213847	950	-	5387899	5388199	0	2	50,50	0,250
chrI	5407153	5407622	neuroPSI:0.62889166	950	-	5407153	5407622	0	2	50,50	0,419
chrI	5407453	5407622	neuroPSI:0.37110834	950	-	5407453	5407622	0	2	50,50	0,119
chrI	5407153	5407529	neuroPSI:0.42954990	950	-	5407153	5407529	0	2	50,50	0,326
chrV	5551632	5551822	neuroPSI:0.52508292	950	-	5551632	5551822	0	2	50,50	0,140
chrV	5550830	5551822	neuroPSI:0.47491708	950	-	5550830	5551822	0	2	50,50	0,942
chrV	5550830	5551660	neuroPSI:0.54989868	950	-	5550830	5551660	0	2	50,50	0,780
chrI	5569518	5569754	neuroPSI:0.17110479	950	-	5569518	5569754	0	2	50,50	0,186
chrI	5569149	5569754	neuroPSI:0.82889521	950	-	5569149	5569754	0	2	50,50	0,555
chrI	5569149	5569594	neuroPSI:0.14969010	950	-	5569149	5569594	0	2	50,50	0,395
chrIII	5612968	5613194	neuroPSI:0.52369338	950	+	5612968	5613194	0	2	50,50	0,176
chrIII	5612968	5613433	neuroPSI:0.47630662	950	+	5612968	5613433	0	2	50,50	0,415
chrIII	5613121	5613433	neuroPSI:0.50882807	950	+	5613121	5613433	0	2	50,50	0,262
chrIII	5673330	5674066	neuroPSI:0.11433824	950	+	5673330	5674066	0	2	50,50	0,686
chrIII	5673330	5674770	neuroPSI:0.88566176	950	+	5673330	5674770	0	2	50,50	0,1390
chrIII	5674139	5674770	neuroPSI:0.12571715	950	+	5674139	5674770	0	2	50,50	0,581
chrX	5795346	5795978	neuroPSI:0.73256696	950	+	5795346	5795978	0	2	50,50	0,582
chrX	5795346	5795536	neuroPSI:0.26743304	950	+	5795346	5795536	0	2	50,50	0,140
chrX	5795490	5795978	neuroPSI:0.28664952	950	+	5795490	5795978	0	2	50,50	0,438
chrV	5803272	5803916	neuroPSI:0.28346682	950	+	5803272	5803916	0	2	50,50	0,594
chrV	5803272	5803491	neuroPSI:0.71653318	950	+	5803272	5803491	0	2	50,50	0,169
chrV	5803565	5803916	neuroPSI:0.80399606	950	+	5803565	5803916	0	2	50,50	0,301
chrIII	5880428	5880597	neuroPSI:0.50858536	950	+	5880428	5880597	0	2	50,50	0,119
chrIII	5879983	5881102	neuroPSI:0.49141464	950	+	5879983	5881102	0	2	50,50	0,1069
chrIII	5880879	5881102	neuroPSI:0.64242424	950	+	5880879	5881102	0	2	50,50	0,173
chrI	5892582	5893473	neuroPSI:0.49358974	950	+	5892582	5893473	0	2	50,50	0,841
chrI	5892582	5893212	neuroPSI:0.50641026	950	+	5892582	5893212	0	2	50,50	0,580
chrI	5893184	5893473	neuroPSI:0.52448980	950	+	5893184	5893473	0	2	50,50	0,239
chrIII	5905297	5905446	neuroPSI:0.60378576	950	-	5905297	5905446	0	2	50,50	0,99
chrIII	5904402	5905446	neuroPSI:0.39621424	950	-	5904402	5905446	0	2	50,50	0,994
chrIII	5904402	5905294	neuroPSI:0.62825061	950	-	5904402	5905294	0	2	50,50	0,842
chrV	5962694	5963132	neuroPSI:0.14274534	950	-	5962694	5963132	0	2	50,50	0,388
chrV	5962852	5963132	neuroPSI:0.85725466	950	-	5962852	5963132	0	2	50,50	0,230
chrV	5962694	5962847	neuroPSI:0.89739919	950	-	5962694	5962847	0	2	50,50	0,103
chrIV	5981372	5982332	neuroPSI:0.82685426	950	+	5981372	5982332	0	2	50,50	0,910
chrIV	5981372	5982484	neuroPSI:0.17314574	950	+	5981372	5982484	0	2	50,50	0,1062
chrIV	5982250	5982484	neuroPSI:0.80126096	950	+	5982250	5982484	0	2	50,50	0,184
chrIII	6004591	6005300	neuroPSI:0.74754051	950	+	6004591	6005300	0	2	50,50	0,659
chrIII	6004591	6004854	neuroPSI:0.25245949	950	+	6004591	6004854	0	2	50,50	0,213
chrIII	6004898	6005300	neuroPSI:0.25601533	950	+	6004898	6005300	0	2	50,50	0,352
chrIII	6127871	6129391	neuroPSI:0.79137039	950	-	6127871	6129391	0	2	50,50	0,1470
chrIII	6128334	6129391	neuroPSI:0.20862961	950	-	6128334	6129391	0	2	50,50	0,1007
chrIII	6127871	6128371	neuroPSI:0.23834028	950	-	6127871	6128371	0	2	50,50	0,450
chrIII	6130000	6130830	neuroPSI:0.75601206	950	-	6130000	6130830	0	2	50,50	0,780
chrIII	6130440	6130830	neuroPSI:0.24398794	950	-	6130440	6130830	0	2	50,50	0,340
chrIII	6130000	6130261	neuroPSI:0.29779604	950	-	6130000	6130261	0	2	50,50	0,211
chrIV	6157659	6158370	neuroPSI:0.39574312	950	-	6157659	6158370	0	2	50,50	0,661
chrIV	6157864	6158370	neuroPSI:0.60425688	950	-	6157864	6158370	0	2	50,50	0,456
chrIV	6157659	6157877	neuroPSI:0.58267879	950	-	6157659	6157877	0	2	50,50	0,168
chrIII	6166414	6166568	neuroPSI:0.68686757	950	-	6166414	6166568	0	2	50,50	0,104
chrIII	6166245	6166568	neuroPSI:0.31313243	950	-	6166245	6166568	0	2	50,50	0,273
chrIII	6166245	6166490	neuroPSI:0.68892037	950	-	6166245	6166490	0	2	50,50	0,195
chrII	6197669	6197855	neuroPSI:0.49844829	950	+	6197669	6197855	0	2	50,50	0,136
chrII	6197669	6198076	neuroPSI:0.50155171	950	+	6197669	6198076	0	2	50,50	0,357
chrII	6197918	6198076	neuroPSI:0.47501925	950	+	6197918	6198076	0	2	50,50	0,108
chrV	6216368	6216529	neuroPSI:0.13622733	950	+	6216368	6216529	0	2	50,50	0,111
chrV	6216368	6216838	neuroPSI:0.86377267	950	+	6216368	6216838	0	2	50,50	0,420
chrV	6216444	6216838	neuroPSI:0.14033926	950	+	6216444	6216838	0	2	50,50	0,344
chrIII	6340737	6340882	neuroPSI:0.06040523	950	-	6340737	6340882	0	2	50,50	0,95
chrIII	6340410	6340882	neuroPSI:0.93959477	950	-	6340410	6340882	0	2	50,50	0,422
chrIII	6340410	6340741	neuroPSI:0.05817942	950	-	6340410	6340741	0	2	50,50	0,281
chrX	6482847	6483144	neuroPSI:0.31379310	950	-	6482847	6483144	0	2	50,50	0,247
chrX	6482389	6483144	neuroPSI:0.68620690	950	-	6482389	6483144	0	2	50,50	0,705
chrX	6482389	6482854	neuroPSI:0.35786016	950	-	6482389	6482854	0	2	50,50	0,415
chrII	6586120	6586314	neuroPSI:0.78115959	950	-	6586120	6586314	0	2	50,50	0,144
chrII	6586062	6586314	neuroPSI:0.21884041	950	-	6586062	6586314	0	2	50,50	0,202
chrII	6586062	6586211	neuroPSI:0.80654466	950	-	6586062	6586211	0	2	50,50	0,99
chrIII	6698860	6699126	neuroPSI:0.53734077	950	+	6698860	6699126	0	2	50,50	0,216
chrIII	6698860	6699293	neuroPSI:0.46265923	950	+	6698860	6699293	0	2	50,50	0,383
chrIII	6699080	6699293	neuroPSI:0.53998114	950	+	6699080	6699293	0	2	50,50	0,163
chrIII	6700536	6702220	neuroPSI:0.44348404	950	+	6700536	6702220	0	2	50,50	0,1634
chrIII	6700536	6701148	neuroPSI:0.55651596	950	+	6700536	6701148	0	2	50,50	0,562
chrIII	6701300	6702220	neuroPSI:0.68649409	950	+	6701300	6702220	0	2	50,50	0,870
chrV	6706105	6706247	neuroPSI:0.59744685	950	-	6706105	6706247	0	2	50,50	0,92
chrV	6705242	6706247	neuroPSI:0.40255315	950	-	6705242	6706247	0	2	50,50	0,955
chrV	6705242	6706097	neuroPSI:0.64634343	950	-	6705242	6706097	0	2	50,50	0,805
chrV	6872287	6872436	neuroPSI:0.28083228	950	+	6872287	6872436	0	2	50,50	0,99
chrV	6872287	6872675	neuroPSI:0.71916772	950	+	6872287	6872675	0	2	50,50	0,338
chrV	6872373	6872675	neuroPSI:0.32045726	950	+	6872373	6872675	0	2	50,50	0,252
chrIV	6914185	6914859	neuroPSI:0.89957291	950	+	6914185	6914859	0	2	50,50	0,624
chrIV	6914185	6915127	neuroPSI:0.10042709	950	+	6914185	6915127	0	2	50,50	0,892
chrIV	6914795	6915127	neuroPSI:0.88961004	950	+	6914795	6915127	0	2	50,50	0,282
chrIV	6916125	6916622	neuroPSI:0.17520643	950	+	6916125	6916622	0	2	50,50	0,447
chrIV	6916125	6916901	neuroPSI:0.82479357	950	+	6916125	6916901	0	2	50,50	0,726
chrIV	6916572	6916901	neuroPSI:0.15549221	950	+	6916572	6916901	0	2	50,50	0,279
chrIII	6924993	6925405	neuroPSI:0.29798061	950	-	6924993	6925405	0	2	50,50	0,362
chrIII	6924829	6925405	neuroPSI:0.70201939	950	-	6924829	6925405	0	2	50,50	0,526
chrIII	6924829	6925057	neuroPSI:0.33911315	950	-	6924829	6925057	0	2	50,50	0,178
chrI	6927708	6928045	neuroPSI:0.85989950	950	+	6927708	6928045	0	2	50,50	0,287
chrI	6927708	6928532	neuroPSI:0.14010050	950	+	6927708	6928532	0	2	50,50	0,774
chrI	6928081	6928532	neuroPSI:0.89751275	950	+	6928081	6928532	0	2	50,50	0,401
chrII	6953979	6954428	neuroPSI:0.31718613	950	+	6953979	6954428	0	2	50,50	0,399
chrII	6953979	6954212	neuroPSI:0.68281387	950	+	6953979	6954212	0	2	50,50	0,183
chrII	6954199	6954428	neuroPSI:0.71957293	950	+	6954199	6954428	0	2	50,50	0,179
chrII	7004740	7006025	neuroPSI:0.67353828	950	+	7004740	7006025	0	2	50,50	0,1235
chrII	7004740	7006519	neuroPSI:0.32646172	950	+	7004740	7006519	0	2	50,50	0,1729
chrII	7006066	7006519	neuroPSI:0.72214964	950	+	7006066	7006519	0	2	50,50	0,403
chrIII	7016823	7017406	neuroPSI:0.65436366	950	+	7016823	7017406	0	2	50,50	0,533
chrIII	7016823	7016987	neuroPSI:0.34563634	950	+	7016823	7016987	0	2	50,50	0,114
chrIII	7016944	7017406	neuroPSI:0.33042506	950	+	7016944	7017406	0	2	50,50	0,412
chrIII	7035463	7036720	neuroPSI:0.09931751	950	-	7035463	7036720	0	2	50,50	0,1207
chrIII	7036314	7036720	neuroPSI:0.90068249	950	-	7036314	7036720	0	2	50,50	0,356
chrIII	7035463	7036257	neuroPSI:0.91143415	950	-	7035463	7036257	0	2	50,50	0,744
chrIII	7075260	7075723	neuroPSI:0.61904762	950	-	7075260	7075723	0	2	50,50	0,413
chrIII	7074779	7075723	neuroPSI:0.38095238	950	-	7074779	7075723	0	2	50,50	0,894
chrIII	7074779	7075182	neuroPSI:0.76879845	950	-	7074779	7075182	0	2	50,50	0,353
chrIV	7086049	7086232	neuroPSI:0.53675345	950	-	7086049	7086232	0	2	50,50	0,133
chrIV	7085807	7086232	neuroPSI:0.46324655	950	-	7085807	7086232	0	2	50,50	0,375
chrIV	7085807	7086116	neuroPSI:0.50931358	950	-	7085807	7086116	0	2	50,50	0,259
chrI	7228016	7228400	neuroPSI:0.54322169	950	+	7228016	7228400	0	2	50,50	0,334
chrI	7228016	7228878	neuroPSI:0.45677831	950	+	7228016	7228878	0	2	50,50	0,812
chrI	7228498	7228878	neuroPSI:0.66612111	950	+	7228498	7228878	0	2	50,50	0,330
chrX	7239792	7240136	neuroPSI:0.09113769	950	-	7239792	7240136	0	2	50,50	0,294
chrX	7239535	7240136	neuroPSI:0.90886231	950	-	7239535	7240136	0	2	50,50	0,551
chrX	7239535	7239874	neuroPSI:0.09835094	950	-	7239535	7239874	0	2	50,50	0,289
chrX	7273605	7274367	neuroPSI:0.26531583	950	-	7273605	7274367	0	2	50,50	0,712
chrX	7274094	7274367	neuroPSI:0.73468417	950	-	7274094	7274367	0	2	50,50	0,223
chrX	7273605	7273879	neuroPSI:0.82204536	950	-	7273605	7273879	0	2	50,50	0,224
chrIV	7349759	7349944	neuroPSI:0.26227715	950	-	7349759	7349944	0	2	50,50	0,135
chrIV	7349426	7349944	neuroPSI:0.73772285	950	-	7349426	7349944	0	2	50,50	0,468
chrIV	7349426	7349805	neuroPSI:0.24660790	950	-	7349426	7349805	0	2	50,50	0,329
chrIV	7437809	7438237	neuroPSI:0.22792398	950	+	7437809	7438237	0	2	50,50	0,378
chrIV	7437809	7437987	neuroPSI:0.77207602	950	+	7437809	7437987	0	2	50,50	0,128
chrIV	7438004	7438237	neuroPSI:0.77200729	950	+	7438004	7438237	0	2	50,50	0,183
chrIV	7438548	7439105	neuroPSI:0.72136223	950	+	7438548	7439105	0	2	50,50	0,507
chrIV	7438548	7438801	neuroPSI:0.27863777	950	+	7438548	7438801	0	2	50,50	0,203
chrIV	7438848	7439105	neuroPSI:0.34234234	950	+	7438848	7439105	0	2	50,50	0,207
chrIV	7440776	7440929	neuroPSI:0.61627907	950	+	7440776	7440929	0	2	50,50	0,103
chrIV	7440776	7442083	neuroPSI:0.38372093	950	+	7440776	7442083	0	2	50,50	0,1257
chrIV	7440866	7442083	neuroPSI:0.61789693	950	+	7440866	7442083	0	2	50,50	0,1167
chrI	7463888	7464525	neuroPSI:0.17386185	950	-	7463888	7464525	0	2	50,50	0,587
chrI	7463184	7464525	neuroPSI:0.82613815	950	-	7463184	7464525	0	2	50,50	0,1291
chrI	7463184	7463574	neuroPSI:0.28242483	950	-	7463184	7463574	0	2	50,50	0,340
chrII	7508114	7508276	neuroPSI:0.11451416	950	-	7508114	7508276	0	2	50,50	0,112
chrII	7507516	7508276	neuroPSI:0.88548584	950	-	7507516	7508276	0	2	50,50	0,710
chrII	7507516	7508178	neuroPSI:0.11797647	950	-	7507516	7508178	0	2	50,50	0,612
chrIII	7569971	7570122	neuroPSI:0.56666667	950	-	7569971	7570122	0	2	50,50	0,101
chrIII	7569274	7570122	neuroPSI:0.43333333	950	-	7569274	7570122	0	2	50,50	0,798
chrIII	7569274	7570026	neuroPSI:0.64318182	950	-	7569274	7570026	0	2	50,50	0,702
chrII	7683477	7683725	neuroPSI:0.50585049	950	+	7683477	7683725	0	2	50,50	0,198
chrII	7683477	7684015	neuroPSI:0.49414951	950	+	7683477	7684015	0	2	50,50	0,488
chrII	7683717	7684015	neuroPSI:0.56102230	950	+	7683717	7684015	0	2	50,50	0,248
chrX	7693529	7693727	neuroPSI:0.37876773	950	-	7693529	7693727	0	2	50,50	0,148
chrX	7693072	7693727	neuroPSI:0.62123227	950	-	7693072	7693727	0	2	50,50	0,605
chrX	7693072	7693602	neuroPSI:0.38365617	950	-	7693072	7693602	0	2	50,50	0,480
chrIV	7715333	7715518	neuroPSI:0.25688878	950	-	7715333	7715518	0	2	50,50	0,135
chrIV	7715097	7715518	neuroPSI:0.74311122	950	-	7715097	7715518	0	2	50,50	0,371
chrIV	7715097	7715361	neuroPSI:0.36892713	950	-	7715097	7715361	0	2	50,50	0,214
chrIV	7768566	7769796	neuroPSI:0.08693923	950	-	7768566	7769796	0	2	50,50	0,1180
chrIV	7768940	7769796	neuroPSI:0.91306077	950	-	7768940	7769796	0	2	50,50	0,806
chrIV	7768566	7768953	neuroPSI:0.91091144	950	-	7768566	7768953	0	2	50,50	0,337
chrII	7786382	7786648	neuroPSI:0.62758832	950	-	7786382	7786648	0	2	50,50	0,216
chrII	7785456	7786648	neuroPSI:0.37241168	950	-	7785456	7786648	0	2	50,50	0,1142
chrII	7785456	7786440	neuroPSI:0.63009737	950	-	7785456	7786440	0	2	50,50	0,934
chrIV	7815261	7815628	neuroPSI:0.24184394	950	-	7815261	7815628	0	2	50,50	0,317
chrIV	7815450	7815628	neuroPSI:0.75815606	950	-	7815450	7815628	0	2	50,50	0,128
chrIV	7815261	7815520	neuroPSI:0.73291492	950	-	7815261	7815520	0	2	50,50	0,209
chrI	7837876	7838659	neuroPSI:0.08976961	950	+	7837876	7838659	0	2	50,50	0,733
chrI	7837876	7838821	neuroPSI:0.91023039	950	+	7837876	7838821	0	2	50,50	0,895
chrI	7838642	7838821	neuroPSI:0.70790134	950	+	7838642	7838821	0	2	50,50	0,129
chrIV	7893749	7894329	neuroPSI:0.83104276	950	+	7893749	7894329	0	2	50,50	0,530
chrIV	7893749	7894027	neuroPSI:0.16895724	950	+	7893749	7894027	0	2	50,50	0,228
chrIV	7893978	7894329	neuroPSI:0.19492610	950	+	7893978	7894329	0	2	50,50	0,301
chrIV	7905878	7906084	neuroPSI:0.36735439	950	+	7905878	7906084	0	2	50,50	0,156
chrIV	7905878	7906832	neuroPSI:0.63264561	950	+	7905878	7906832	0	2	50,50	0,904
chrIV	7906146	7906832	neuroPSI:0.41465827	950	+	7906146	7906832	0	2	50,50	0,636
chrX	7940574	7940933	neuroPSI:0.52364418	950	-	7940574	7940933	0	2	50,50	0,309
chrX	7940774	7940933	neuroPSI:0.47635582	950	-	7940774	7940933	0	2	50,50	0,109
chrX	7940574	7940846	neuroPSI:0.47646404	950	-	7940574	7940846	0	2	50,50	0,222
chrIII	7985125	7985714	neuroPSI:0.29694613	950	+	7985125	7985714	0	2	50,50	0,539
chrIII	7985125	7985392	neuroPSI:0.70305387	950	+	7985125	7985392	0	2	50,50	0,217
chrIII	7985301	7985714	neuroPSI:0.70393506	950	+	7985301	7985714	0	2	50,50	0,363
chrII	8024547	8025242	neuroPSI:0.58061975	950	-	8024547	8025242	0	2	50,50	0,645
chrII	8025054	8025242	neuroPSI:0.41938025	950	-	8025054	8025242	0	2	50,50	0,138
chrII	8024547	8025025	neuroPSI:0.49929209	950	-	8024547	8025025	0	2	50,50	0,428
chrI	8092231	8092441	neuroPSI:0.59614001	950	+	8092231	8092441	0	2	50,50	0,160
chrI	8092231	8093386	neuroPSI:0.40385999	950	+	8092231	8093386	0	2	50,50	0,1105
chrI	8092365	8093386	neuroPSI:0.62489686	950	+	8092365	8093386	0	2	50,50	0,971
chrIII	8332390	8332635	neuroPSI:0.11551823	950	+	8332390	8332635	0	2	50,50	0,195
chrIII	8332390	8332822	neuroPSI:0.88448177	950	+	8332390	8332822	0	2	50,50	0,382
chrIII	8332594	8332822	neuroPSI:0.07875650	950	+	8332594	8332822	0	2	50,50	0,178
chrIII	8384182	8384426	neuroPSI:0.71177945	950	+	8384182	8384426	0	2	50,50	0,194
chrIII	8384182	8385349	neuroPSI:0.28822055	950	+	8384182	8385349	0	2	50,50	0,1117
chrIII	8384500	8385349	neuroPSI:0.39285714	950	+	8384500	8385349	0	2	50,50	0,799
chrIV	8561551	8561785	neuroPSI:0.57065732	950	+	8561551	8561785	0	2	50,50	0,184
chrIV	8561551	8562725	neuroPSI:0.42934268	950	+	8561551	8562725	0	2	50,50	0,1124
chrIV	8561749	8562725	neuroPSI:0.53067916	950	+	8561749	8562725	0	2	50,50	0,926
chrX	8618874	8619786	neuroPSI:0.18133558	950	+	8618874	8619786	0	2	50,50	0,862
chrX	8618874	8619220	neuroPSI:0.81866442	950	+	8618874	8619220	0	2	50,50	0,296
chrX	8619218	8619786	neuroPSI:0.81052341	950	+	8619218	8619786	0	2	50,50	0,518
chrIII	8632740	8633295	neuroPSI:0.68948475	950	+	8632740	8633295	0	2	50,50	0,505
chrIII	8632740	8633111	neuroPSI:0.31051525	950	+	8632740	8633111	0	2	50,50	0,321
chrIII	8633126	8633295	neuroPSI:0.30073609	950	+	8633126	8633295	0	2	50,50	0,119
chrX	8701951	8702746	neuroPSI:0.64201357	950	+	8701951	8702746	0	2	50,50	0,745
chrX	8701951	8702206	neuroPSI:0.35798643	950	+	8701951	8702206	0	2	50,50	0,205
chrX	8702142	8702746	neuroPSI:0.32725785	950	+	8702142	8702746	0	2	50,50	0,554
chrI	8709353	8709974	neuroPSI:0.78542140	950	-	8709353	8709974	0	2	50,50	0,571
chrI	8709781	8709974	neuroPSI:0.21457860	950	-	8709781	8709974	0	2	50,50	0,143
chrI	8709353	8709812	neuroPSI:0.25285192	950	-	8709353	8709812	0	2	50,50	0,409
chrIII	8724694	8724850	neuroPSI:0.13022983	950	+	8724694	8724850	0	2	50,50	0,106
chrIII	8724694	8725037	neuroPSI:0.86977017	950	+	8724694	8725037	0	2	50,50	0,293
chrIII	8724797	8725037	neuroPSI:0.11381181	950	+	8724797	8725037	0	2	50,50	0,190
chrI	8817199	8817657	neuroPSI:0.69632840	950	+	8817199	8817657	0	2	50,50	0,408
chrI	8817199	8817370	neuroPSI:0.30367160	950	+	8817199	8817370	0	2	50,50	0,121
chrI	8817351	8817657	neuroPSI:0.23973430	950	+	8817351	8817657	0	2	50,50	0,256
chrI	8820327	8820663	neuroPSI:0.28147660	950	+	8820327	8820663	0	2	50,50	0,286
chrI	8820327	8820493	neuroPSI:0.71852340	950	+	8820327	8820493	0	2	50,50	0,116
chrI	8820504	8820663	neuroPSI:0.79946153	950	+	8820504	8820663	0	2	50,50	0,109
chrI	8909097	8909634	neuroPSI:0.38939308	950	-	8909097	8909634	0	2	50,50	0,487
chrI	8909303	8909634	neuroPSI:0.61060692	950	-	8909303	8909634	0	2	50,50	0,281
chrI	8909097	8909322	neuroPSI:0.66253694	950	-	8909097	8909322	0	2	50,50	0,175
chrV	8910089	8910951	neuroPSI:0.71895324	950	-	8910089	8910951	0	2	50,50	0,812
chrV	8910722	8910951	neuroPSI:0.28104676	950	-	8910722	8910951	0	2	50,50	0,179
chrV	8910089	8910780	neuroPSI:0.31880726	950	-	8910089	8910780	0	2	50,50	0,641
chrIV	8929203	8929865	neuroPSI:0.74233461	950	+	8929203	8929865	0	2	50,50	0,612
chrIV	8929203	8930265	neuroPSI:0.25766539	950	+	8929203	8930265	0	2	50,50	0,1012
chrIV	8929998	8930265	neuroPSI:0.50622051	950	+	8929998	8930265	0	2	50,50	0,217
chrI	8940227	8940873	neuroPSI:0.70091185	950	-	8940227	8940873	0	2	50,50	0,596
chrI	8940517	8940873	neuroPSI:0.29908815	950	-	8940517	8940873	0	2	50,50	0,306
chrI	8940227	8940611	neuroPSI:0.28092591	950	-	8940227	8940611	0	2	50,50	0,334
chrIV	8985058	8985592	neuroPSI:0.49939232	950	+	8985058	8985592	0	2	50,50	0,484
chrIV	8985058	8985449	neuroPSI:0.50060768	950	+	8985058	8985449	0	2	50,50	0,341
chrIV	8985452	8985592	neuroPSI:0.49797184	950	+	8985452	8985592	0	2	50,50	0,90
chrII	8998257	8998470	neuroPSI:0.84251135	950	+	8998257	8998470	0	2	50,50	0,163
chrII	8998257	8998798	neuroPSI:0.15748865	950	+	8998257	8998798	0	2	50,50	0,491
chrII	8998609	8998798	neuroPSI:0.89211587	950	+	8998609	8998798	0	2	50,50	0,139
chrIV	9095129	9095392	neuroPSI:0.67951252	950	-	9095129	9095392	0	2	50,50	0,213
chrIV	9095248	9095392	neuroPSI:0.32048748	950	-	9095248	9095392	0	2	50,50	0,94
chrIV	9095129	9095288	neuroPSI:0.34075630	950	-	9095129	9095288	0	2	50,50	0,109
chrX	9109210	9109967	neuroPSI:0.51529412	950	+	9109210	9109967	0	2	50,50	0,707
chrX	9109210	9109723	neuroPSI:0.48470588	950	+	9109210	9109723	0	2	50,50	0,463
chrX	9109746	9109967	neuroPSI:0.48956661	950	+	9109746	9109967	0	2	50,50	0,171
chrIV	9127947	9129337	neuroPSI:0.15945926	950	+	9127947	9129337	0	2	50,50	0,1340
chrIV	9127947	9128534	neuroPSI:0.84054074	950	+	9127947	9128534	0	2	50,50	0,537
chrIV	9128638	9129337	neuroPSI:0.88927286	950	+	9128638	9129337	0	2	50,50	0,649
chrV	9205151	9205692	neuroPSI:0.36643050	950	-	9205151	9205692	0	2	50,50	0,491
chrV	9205417	9205692	neuroPSI:0.63356950	950	-	9205417	9205692	0	2	50,50	0,225
chrV	9205151	9205452	neuroPSI:0.63959239	950	-	9205151	9205452	0	2	50,50	0,251
chrIV	9208466	9209143	neuroPSI:0.72025879	950	+	9208466	9209143	0	2	50,50	0,627
chrIV	9208466	9210413	neuroPSI:0.27974121	950	+	9208466	9210413	0	2	50,50	0,1897
chrIV	9209526	9210413	neuroPSI:0.79978400	950	+	9209526	9210413	0	2	50,50	0,837
chrX	9253574	9253758	neuroPSI:0.32671958	950	+	9253574	9253758	0	2	50,50	0,134
chrX	9253574	9254195	neuroPSI:0.67328042	950	+	9253574	9254195	0	2	50,50	0,571
chrX	9253793	9254195	neuroPSI:0.34027778	950	+	9253793	9254195	0	2	50,50	0,352
chrII	9259567	9259720	neuroPSI:0.68541164	950	-	9259567	9259720	0	2	50,50	0,103
chrII	9259334	9259720	neuroPSI:0.31458836	950	-	9259334	9259720	0	2	50,50	0,336
chrII	9259334	9259639	neuroPSI:0.71874334	950	-	9259334	9259639	0	2	50,50	0,255
chrV	9343517	9343725	neuroPSI:0.79424048	950	-	9343517	9343725	0	2	50,50	0,158
chrV	9343366	9343725	neuroPSI:0.20575952	950	-	9343366	9343725	0	2	50,50	0,309
chrV	9343366	9343550	neuroPSI:0.74755915	950	-	9343366	9343550	0	2	50,50	0,134
chrV	9358431	9358585	neuroPSI:0.91098518	950	-	9358431	9358585	0	2	50,50	0,104
chrV	9358256	9358585	neuroPSI:0.08901482	950	-	9358256	9358585	0	2	50,50	0,279
chrV	9358256	9358402	neuroPSI:0.92680690	950	-	9358256	9358402	0	2	50,50	0,96
chrII	9361816	9362093	neuroPSI:0.83008568	950	+	9361816	9362093	0	2	50,50	0,227
chrII	9361816	9363017	neuroPSI:0.16991432	950	+	9361816	9363017	0	2	50,50	0,1151
chrII	9362323	9363017	neuroPSI:0.84449598	950	+	9362323	9363017	0	2	50,50	0,644
chrI	9441468	9443086	neuroPSI:0.47888992	950	-	9441468	9443086	0	2	50,50	0,1568
chrI	9442229	9443086	neuroPSI:0.52111008	950	-	9442229	9443086	0	2	50,50	0,807
chrI	9441468	9441990	neuroPSI:0.68516101	950	-	9441468	9441990	0	2	50,50	0,472
chrV	9459425	9459643	neuroPSI:0.79822972	950	+	9459425	9459643	0	2	50,50	0,168
chrV	9459425	9460101	neuroPSI:0.20177028	950	+	9459425	9460101	0	2	50,50	0,626
chrV	9459620	9460101	neuroPSI:0.80750835	950	+	9459620	9460101	0	2	50,50	0,431
chrIII	9460173	9460567	neuroPSI:0.53562940	950	+	9460173	9460567	0	2	50,50	0,344
chrIII	9460173	9461115	neuroPSI:0.46437060	950	+	9460173	9461115	0	2	50,50	0,892
chrIII	9460644	9461115	neuroPSI:0.56248082	950	+	9460644	9461115	0	2	50,50	0,421
chrIII	9553673	9554147	neuroPSI:0.82090613	950	+	9553673	9554147	0	2	50,50	0,424
chrIII	9553673	9554492	neuroPSI:0.17909387	950	+	9553673	9554492	0	2	50,50	0,769
chrIII	9554131	9554492	neuroPSI:0.82883203	950	+	9554131	9554492	0	2	50,50	0,311
chrX	9554108	9554348	neuroPSI:0.68756356	950	+	9554108	9554348	0	2	50,50	0,190
chrX	9554108	9554741	neuroPSI:0.31243644	950	+	9554108	9554741	0	2	50,50	0,583
chrX	9554497	9554741	neuroPSI:0.78335187	950	+	9554497	9554741	0	2	50,50	0,194
chrX	9562224	9562975	neuroPSI:0.15962589	950	-	9562224	9562975	0	2	50,50	0,701
chrX	9562349	9562975	neuroPSI:0.84037411	950	-	9562349	9562975	0	2	50,50	0,576
chrX	9562224	9562377	neuroPSI:0.82039091	950	-	9562224	9562377	0	2	50,50	0,103
chrI	9566093	9566743	neuroPSI:0.46526599	950	-	9566093	9566743	0	2	50,50	0,600
chrI	9566402	9566743	neuroPSI:0.53473401	950	-	9566402	9566743	0	2	50,50	0,291
chrI	9566093	9566424	neuroPSI:0.51824067	950	-	9566093	9566424	0	2	50,50	0,281
chrII	9578416	9579849	neuroPSI:0.42850123	950	+	9578416	9579849	0	2	50,50	0,1383
chrII	9578416	9579242	neuroPSI:0.57149877	950	+	9578416	9579242	0	2	50,50	0,776
chrII	9579246	9579849	neuroPSI:0.60417360	950	+	9579246	9579849	0	2	50,50	0,553
chrV	9611314	9612015	neuroPSI:0.59964389	950	+	9611314	9612015	0	2	50,50	0,651
chrV	9611314	9612781	neuroPSI:0.40035611	950	+	9611314	9612781	0	2	50,50	0,1417
chrV	9612347	9612781	neuroPSI:0.49080882	950	+	9612347	9612781	0	2	50,50	0,384
chrX	9614048	9614570	neuroPSI:0.72601584	950	+	9614048	9614570	0	2	50,50	0,472
chrX	9614048	9614811	neuroPSI:0.27398416	950	+	9614048	9614811	0	2	50,50	0,713
chrX	9614641	9614811	neuroPSI:0.80412751	950	+	9614641	9614811	0	2	50,50	0,120
chrV	9706968	9707582	neuroPSI:0.65385615	950	+	9706968	9707582	0	2	50,50	0,564
chrV	9706968	9707137	neuroPSI:0.34614385	950	+	9706968	9707137	0	2	50,50	0,119
chrV	9707106	9707582	neuroPSI:0.33119383	950	+	9707106	9707582	0	2	50,50	0,426
chrIII	9855533	9856140	neuroPSI:0.86643201	950	-	9855533	9856140	0	2	50,50	0,557
chrIII	9855913	9856140	neuroPSI:0.13356799	950	-	9855913	9856140	0	2	50,50	0,177
chrIII	9855533	9855986	neuroPSI:0.13468565	950	-	9855533	9855986	0	2	50,50	0,403
chrIV	9858876	9860155	neuroPSI:0.68554217	950	+	9858876	9860155	0	2	50,50	0,1229
chrIV	9858876	9859647	neuroPSI:0.31445783	950	+	9858876	9859647	0	2	50,50	0,721
chrIV	9859817	9860155	neuroPSI:0.44906445	950	+	9859817	9860155	0	2	50,50	0,288
chrIII	9863764	9864883	neuroPSI:0.50112527	950	-	9863764	9864883	0	2	50,50	0,1069
chrIII	9864509	9864883	neuroPSI:0.49887473	950	-	9864509	9864883	0	2	50,50	0,324
chrIII	9863764	9864355	neuroPSI:0.56836268	950	-	9863764	9864355	0	2	50,50	0,541
chrI	9933947	9934202	neuroPSI:0.31405176	950	-	9933947	9934202	0	2	50,50	0,205
chrI	9933647	9934202	neuroPSI:0.68594824	950	-	9933647	9934202	0	2	50,50	0,505
chrI	9933647	9933911	neuroPSI:0.38946348	950	-	9933647	9933911	0	2	50,50	0,214
chrI	10071570	10071833	neuroPSI:0.16201837	950	-	10071570	10071833	0	2	50,50	0,213
chrI	10071685	10071833	neuroPSI:0.83798163	950	-	10071685	10071833	0	2	50,50	0,98
chrI	10071570	10071716	neuroPSI:0.87785875	950	-	10071570	10071716	0	2	50,50	0,96
chrX	10101544	10101892	neuroPSI:0.74476812	950	+	10101544	10101892	0	2	50,50	0,298
chrX	10101544	10101709	neuroPSI:0.25523188	950	+	10101544	10101709	0	2	50,50	0,115
chrX	10101636	10101892	neuroPSI:0.31186237	950	+	10101636	10101892	0	2	50,50	0,206
chrX	10106248	10106877	neuroPSI:0.76401337	950	-	10106248	10106877	0	2	50,50	0,579
chrX	10106671	10106877	neuroPSI:0.23598663	950	-	10106671	10106877	0	2	50,50	0,156
chrX	10106248	10106732	neuroPSI:0.19505341	950	-	10106248	10106732	0	2	50,50	0,434
chrX	10311517	10311702	neuroPSI:0.07381403	950	+	10311517	10311702	0	2	50,50	0,135
chrX	10311517	10312065	neuroPSI:0.92618597	950	+	10311517	10312065	0	2	50,50	0,498
chrX	10311693	10312065	neuroPSI:0.05919349	950	+	10311693	10312065	0	2	50,50	0,322
chrIV	10334119	10337681	neuroPSI:0.76144257	950	-	10334119	10337681	0	2	50,50	0,3512
chrIV	10336214	10337681	neuroPSI:0.23855743	950	-	10336214	10337681	0	2	50,50	0,1417
chrIV	10334119	10336161	neuroPSI:0.24388044	950	-	10334119	10336161	0	2	50,50	0,1992
chrX	10375134	10375319	neuroPSI:0.17817568	950	-	10375134	10375319	0	2	50,50	0,135
chrX	10374965	10375319	neuroPSI:0.82182432	950	-	10374965	10375319	0	2	50,50	0,304
chrX	10374965	10375192	neuroPSI:0.21200593	950	-	10374965	10375192	0	2	50,50	0,177
chrI	10412896	10413411	neuroPSI:0.70396825	950	+	10412896	10413411	0	2	50,50	0,465
chrI	10412896	10413542	neuroPSI:0.29603175	950	+	10412896	10413542	0	2	50,50	0,596
chrI	10413359	10413542	neuroPSI:0.72999312	950	+	10413359	10413542	0	2	50,50	0,133
chrII	10460477	10460690	neuroPSI:0.74637350	950	+	10460477	10460690	0	2	50,50	0,163
chrII	10460477	10460918	neuroPSI:0.25362650	950	+	10460477	10460918	0	2	50,50	0,391
chrII	10460617	10460918	neuroPSI:0.73293139	950	+	10460617	10460918	0	2	50,50	0,251
chrIII	10466137	10467087	neuroPSI:0.42206365	950	+	10466137	10467087	0	2	50,50	0,900
chrIII	10466137	10466344	neuroPSI:0.57793635	950	+	10466137	10466344	0	2	50,50	0,157
chrIII	10466532	10467087	neuroPSI:0.60922659	950	+	10466532	10467087	0	2	50,50	0,505
chrV	10475507	10476328	neuroPSI:0.28324286	950	+	10475507	10476328	0	2	50,50	0,771
chrV	10475507	10475691	neuroPSI:0.71675714	950	+	10475507	10475691	0	2	50,50	0,134
chrV	10475654	10476328	neuroPSI:0.73434173	950	+	10475654	10476328	0	2	50,50	0,624
chrV	10510913	10511469	neuroPSI:0.85568102	950	-	10510913	10511469	0	2	50,50	0,506
chrV	10511127	10511469	neuroPSI:0.14431898	950	-	10511127	10511469	0	2	50,50	0,292
chrV	10510913	10511200	neuroPSI:0.14873089	950	-	10510913	10511200	0	2	50,50	0,237
chrI	10639823	10639968	neuroPSI:0.38567355	950	-	10639823	10639968	0	2	50,50	0,95
chrI	10639701	10639968	neuroPSI:0.61432645	950	-	10639701	10639968	0	2	50,50	0,217
chrI	10639701	10639890	neuroPSI:0.39411326	950	-	10639701	10639890	0	2	50,50	0,139
chrX	10669933	10670297	neuroPSI:0.86932939	950	-	10669933	10670297	0	2	50,50	0,314
chrX	10670081	10670297	neuroPSI:0.13067061	950	-	10670081	10670297	0	2	50,50	0,166
chrX	10669933	10670124	neuroPSI:0.13021763	950	-	10669933	10670124	0	2	50,50	0,141
chrIV	10677552	10677982	neuroPSI:0.35270270	950	+	10677552	10677982	0	2	50,50	0,380
chrIV	10677552	10677723	neuroPSI:0.64729730	950	+	10677552	10677723	0	2	50,50	0,121
chrIV	10677719	10677982	neuroPSI:0.56714761	950	+	10677719	10677982	0	2	50,50	0,213
chrII	10687990	10688526	neuroPSI:0.73602935	950	+	10687990	10688526	0	2	50,50	0,486
chrII	10687990	10688807	neuroPSI:0.26397065	950	+	10687990	10688807	0	2	50,50	0,767
chrII	10688460	10688807	neuroPSI:0.74624866	950	+	10688460	10688807	0	2	50,50	0,297
chrX	10741501	10741709	neuroPSI:0.84000344	950	+	10741501	10741709	0	2	50,50	0,158
chrX	10741501	10741837	neuroPSI:0.15999656	950	+	10741501	10741837	0	2	50,50	0,286
chrX	10741688	10741837	neuroPSI:0.86117308	950	+	10741688	10741837	0	2	50,50	0,99
chrX	10778813	10779110	neuroPSI:0.22837838	950	+	10778813	10779110	0	2	50,50	0,247
chrX	10778813	10778959	neuroPSI:0.77162162	950	+	10778813	10778959	0	2	50,50	0,96
chrX	10778957	10779110	neuroPSI:0.77024040	950	+	10778957	10779110	0	2	50,50	0,103
chrX	10800790	10801204	neuroPSI:0.85774002	950	-	10800790	10801204	0	2	50,50	0,364
chrX	10801038	10801204	neuroPSI:0.14225998	950	-	10801038	10801204	0	2	50,50	0,116
chrX	10800790	10801111	neuroPSI:0.15822949	950	-	10800790	10801111	0	2	50,50	0,271
chrIV	10930372	10930681	neuroPSI:0.40482399	950	-	10930372	10930681	0	2	50,50	0,259
chrIV	10930187	10930681	neuroPSI:0.59517601	950	-	10930187	10930681	0	2	50,50	0,444
chrIV	10930187	10930445	neuroPSI:0.45183361	950	-	10930187	10930445	0	2	50,50	0,208
chrV	10992938	10993404	neuroPSI:0.54286137	950	+	10992938	10993404	0	2	50,50	0,416
chrV	10992938	10993235	neuroPSI:0.45713863	950	+	10992938	10993235	0	2	50,50	0,247
chrV	10993162	10993404	neuroPSI:0.43234536	950	+	10993162	10993404	0	2	50,50	0,192
chrIV	11046029	11046236	neuroPSI:0.18034346	950	+	11046029	11046236	0	2	50,50	0,157
chrIV	11046029	11046523	neuroPSI:0.81965654	950	+	11046029	11046523	0	2	50,50	0,444
chrIV	11046193	11046523	neuroPSI:0.19328260	950	+	11046193	11046523	0	2	50,50	0,280
chrII	11051247	11051387	neuroPSI:0.57608696	950	+	11051247	11051387	0	2	50,50	0,90
chrII	11051247	11051548	neuroPSI:0.42391304	950	+	11051247	11051548	0	2	50,50	0,251
chrII	11051394	11051548	neuroPSI:0.65835580	950	+	11051394	11051548	0	2	50,50	0,104
chrII	11060014	11060312	neuroPSI:0.20393552	950	-	11060014	11060312	0	2	50,50	0,248
chrII	11060167	11060312	neuroPSI:0.79606448	950	-	11060167	11060312	0	2	50,50	0,95
chrII	11060014	11060246	neuroPSI:0.80084654	950	-	11060014	11060246	0	2	50,50	0,182
chrX	11074577	11074748	neuroPSI:0.12220751	950	+	11074577	11074748	0	2	50,50	0,121
chrX	11074577	11075088	neuroPSI:0.87779249	950	+	11074577	11075088	0	2	50,50	0,461
chrX	11074651	11075088	neuroPSI:0.11804917	950	+	11074651	11075088	0	2	50,50	0,387
chrI	11323531	11325796	neuroPSI:0.25444444	950	+	11323531	11325796	0	2	50,50	0,2215
chrI	11323531	11324921	neuroPSI:0.74555556	950	+	11323531	11324921	0	2	50,50	0,1340
chrI	11324869	11325796	neuroPSI:0.77418952	950	+	11324869	11325796	0	2	50,50	0,877
chrV	11345753	11346467	neuroPSI:0.17768957	950	-	11345753	11346467	0	2	50,50	0,664
chrV	11346175	11346467	neuroPSI:0.82231043	950	-	11346175	11346467	0	2	50,50	0,242
chrV	11345753	11346218	neuroPSI:0.83911303	950	-	11345753	11346218	0	2	50,50	0,415
chrI	11364505	11365180	neuroPSI:0.11075321	950	-	11364505	11365180	0	2	50,50	0,625
chrI	11365020	11365180	neuroPSI:0.88924679	950	-	11365020	11365180	0	2	50,50	0,110
chrI	11364505	11364970	neuroPSI:0.90764142	950	-	11364505	11364970	0	2	50,50	0,415
chrX	11373105	11374006	neuroPSI:0.20879802	950	+	11373105	11374006	0	2	50,50	0,851
chrX	11373105	11373323	neuroPSI:0.79120198	950	+	11373105	11373323	0	2	50,50	0,168
chrX	11373325	11374006	neuroPSI:0.82500538	950	+	11373325	11374006	0	2	50,50	0,631
chrII	11385104	11386118	neuroPSI:0.14624272	950	-	11385104	11386118	0	2	50,50	0,964
chrII	11385881	11386118	neuroPSI:0.85375728	950	-	11385881	11386118	0	2	50,50	0,187
chrII	11385104	11385827	neuroPSI:0.84610814	950	-	11385104	11385827	0	2	50,50	0,673
chrII	11388052	11388659	neuroPSI:0.64847104	950	-	11388052	11388659	0	2	50,50	0,557
chrII	11388302	11388659	neuroPSI:0.35152896	950	-	11388302	11388659	0	2	50,50	0,307
chrII	11388052	11388312	neuroPSI:0.38695652	950	-	11388052	11388312	0	2	50,50	0,210
chrX	11394946	11395316	neuroPSI:0.84309089	950	-	11394946	11395316	0	2	50,50	0,320
chrX	11395170	11395316	neuroPSI:0.15690911	950	-	11395170	11395316	0	2	50,50	0,96
chrX	11394946	11395234	neuroPSI:0.18752593	950	-	11394946	11395234	0	2	50,50	0,238
chrV	11415719	11416857	neuroPSI:0.91363431	950	-	11415719	11416857	0	2	50,50	0,1088
chrV	11416555	11416857	neuroPSI:0.08636569	950	-	11416555	11416857	0	2	50,50	0,252
chrV	11415719	11416622	neuroPSI:0.25352120	950	-	11415719	11416622	0	2	50,50	0,853
chrIV	11445520	11445689	neuroPSI:0.92505718	950	+	11445520	11445689	0	2	50,50	0,119
chrIV	11445520	11446376	neuroPSI:0.07494282	950	+	11445520	11446376	0	2	50,50	0,806
chrIV	11445858	11446376	neuroPSI:0.93430013	950	+	11445858	11446376	0	2	50,50	0,468
chrX	11670390	11670787	neuroPSI:0.53051032	950	+	11670390	11670787	0	2	50,50	0,347
chrX	11670390	11670536	neuroPSI:0.46948968	950	+	11670390	11670536	0	2	50,50	0,96
chrX	11670450	11670787	neuroPSI:0.37993080	950	+	11670450	11670787	0	2	50,50	0,287
chrI	11689063	11689394	neuroPSI:0.86838130	950	-	11689063	11689394	0	2	50,50	0,281
chrI	11688938	11689394	neuroPSI:0.13161870	950	-	11688938	11689394	0	2	50,50	0,406
chrI	11688938	11689084	neuroPSI:0.82523789	950	-	11688938	11689084	0	2	50,50	0,96
chrI	11748807	11749324	neuroPSI:0.73143475	950	-	11748807	11749324	0	2	50,50	0,467
chrI	11749111	11749324	neuroPSI:0.26856525	950	-	11749111	11749324	0	2	50,50	0,163
chrI	11748807	11749178	neuroPSI:0.25833951	950	-	11748807	11749178	0	2	50,50	0,321
chrX	11832770	11833286	neuroPSI:0.25273973	950	+	11832770	11833286	0	2	50,50	0,466
chrX	11832770	11832931	neuroPSI:0.74726027	950	+	11832770	11832931	0	2	50,50	0,111
chrX	11832948	11833286	neuroPSI:0.71544209	950	+	11832948	11833286	0	2	50,50	0,288
chrIII	11839825	11841897	neuroPSI:0.62780132	950	-	11839825	11841897	0	2	50,50	0,2022
chrIII	11838070	11841897	neuroPSI:0.37219868	950	-	11838070	11841897	0	2	50,50	0,3777
chrIII	11838070	11839799	neuroPSI:0.72480698	950	-	11838070	11839799	0	2	50,50	0,1679
chrII	11978872	11979332	neuroPSI:0.52988196	950	-	11978872	11979332	0	2	50,50	0,410
chrII	11979054	11979332	neuroPSI:0.47011804	950	-	11979054	11979332	0	2	50,50	0,228
chrII	11978872	11979097	neuroPSI:0.49567952	950	-	11978872	11979097	0	2	50,50	0,175
chrV	11992608	11992967	neuroPSI:0.37107384	950	-	11992608	11992967	0	2	50,50	0,309
chrV	11992098	11992967	neuroPSI:0.62892616	950	-	11992098	11992967	0	2	50,50	0,819
chrV	11992098	11992657	neuroPSI:0.37770333	950	-	11992098	11992657	0	2	50,50	0,509
chrX	11998357	11998549	neuroPSI:0.78203616	950	-	11998357	11998549	0	2	50,50	0,142
chrX	11998041	11998549	neuroPSI:0.21796384	950	-	11998041	11998549	0	2	50,50	0,458
chrX	11998041	11998360	neuroPSI:0.83804479	950	-	11998041	11998360	0	2	50,50	0,269
chrI	12062846	12063497	neuroPSI:0.10562066	950	-	12062846	12063497	0	2	50,50	0,601
chrI	12063196	12063497	neuroPSI:0.89437934	950	-	12063196	12063497	0	2	50,50	0,251
chrI	12062846	12063160	neuroPSI:0.91400999	950	-	12062846	12063160	0	2	50,50	0,264
chrIV	12136104	12136252	neuroPSI:0.16837412	950	-	12136104	12136252	0	2	50,50	0,98
chrIV	12135521	12136252	neuroPSI:0.83162588	950	-	12135521	12136252	0	2	50,50	0,681
chrIV	12135521	12136127	neuroPSI:0.27140287	950	-	12135521	12136127	0	2	50,50	0,556
chrV	12323453	12324517	neuroPSI:0.92679043	950	-	12323453	12324517	0	2	50,50	0,1014
chrV	12324167	12324517	neuroPSI:0.07320957	950	-	12324167	12324517	0	2	50,50	0,300
chrV	12323453	12324217	neuroPSI:0.08571429	950	-	12323453	12324217	0	2	50,50	0,714
chrIV	12352261	12353193	neuroPSI:0.85940203	950	+	12352261	12353193	0	2	50,50	0,882
chrIV	12352261	12353063	neuroPSI:0.14059797	950	+	12352261	12353063	0	2	50,50	0,752
chrIV	12353005	12353193	neuroPSI:0.17461322	950	+	12353005	12353193	0	2	50,50	0,138
chrIII	12447308	12448154	neuroPSI:0.82113188	950	-	12447308	12448154	0	2	50,50	0,796
chrIII	12447975	12448154	neuroPSI:0.17886812	950	-	12447975	12448154	0	2	50,50	0,129
chrIII	12447308	12447937	neuroPSI:0.29458785	950	-	12447308	12447937	0	2	50,50	0,579
chrIII	12481626	12481777	neuroPSI:0.90225899	950	+	12481626	12481777	0	2	50,50	0,101
chrIII	12481626	12482839	neuroPSI:0.09774101	950	+	12481626	12482839	0	2	50,50	0,1163
chrIII	12481704	12482839	neuroPSI:0.90909049	950	+	12481704	12482839	0	2	50,50	0,1085
chrV	12699218	12699898	neuroPSI:0.57161049	950	+	12699218	12699898	0	2	50,50	0,630
chrV	12699218	12699456	neuroPSI:0.42838951	950	+	12699218	12699456	0	2	50,50	0,188
chrV	12699395	12699898	neuroPSI:0.41877025	950	+	12699395	12699898	0	2	50,50	0,453
chrI	12710504	12711163	neuroPSI:0.11385203	950	-	12710504	12711163	0	2	50,50	0,609
chrI	12710612	12711163	neuroPSI:0.88614797	950	-	12710612	12711163	0	2	50,50	0,501
chrI	12710504	12710649	neuroPSI:0.87400689	950	-	12710504	12710649	0	2	50,50	0,95
chrIV	12783776	12784112	neuroPSI:0.45613004	950	+	12783776	12784112	0	2	50,50	0,286
chrIV	12783776	12784734	neuroPSI:0.54386996	950	+	12783776	12784734	0	2	50,50	0,908
chrIV	12784024	12784734	neuroPSI:0.40889610	950	+	12784024	12784734	0	2	50,50	0,660
chrII	12785075	12785368	neuroPSI:0.40609606	950	-	12785075	12785368	0	2	50,50	0,243
chrII	12784388	12785368	neuroPSI:0.59390394	950	-	12784388	12785368	0	2	50,50	0,930
chrII	12784388	12785121	neuroPSI:0.44570136	950	-	12784388	12785121	0	2	50,50	0,683
chrIV	13033880	13034502	neuroPSI:0.11845952	950	+	13033880	13034502	0	2	50,50	0,572
chrIV	13033880	13034873	neuroPSI:0.88154048	950	+	13033880	13034873	0	2	50,50	0,943
chrIV	13034478	13034873	neuroPSI:0.12981873	950	+	13034478	13034873	0	2	50,50	0,345
chrX	13043928	13044575	neuroPSI:0.85395568	950	+	13043928	13044575	0	2	50,50	0,597
chrX	13043928	13044720	neuroPSI:0.14604432	950	+	13043928	13044720	0	2	50,50	0,742
chrX	13044575	13044720	neuroPSI:0.88262879	950	+	13044575	13044720	0	2	50,50	0,95
chrIII	13257537	13260640	neuroPSI:0.07730475	950	+	13257537	13260640	0	2	50,50	0,3053
chrIII	13257537	13260788	neuroPSI:0.92269525	950	+	13257537	13260788	0	2	50,50	0,3201
chrIII	13260589	13260788	neuroPSI:0.59310245	950	+	13260589	13260788	0	2	50,50	0,149
chrIV	13266095	13267188	neuroPSI:0.81126651	950	-	13266095	13267188	0	2	50,50	0,1043
chrIV	13265933	13267188	neuroPSI:0.18873349	950	-	13265933	13267188	0	2	50,50	0,1205
chrIV	13265933	13266177	neuroPSI:0.81568108	950	-	13265933	13266177	0	2	50,50	0,194
chrV	13275635	13275926	neuroPSI:0.73436853	950	-	13275635	13275926	0	2	50,50	0,241
chrV	13275346	13275926	neuroPSI:0.26563147	950	-	13275346	13275926	0	2	50,50	0,530
chrV	13275346	13275618	neuroPSI:0.79411765	950	-	13275346	13275618	0	2	50,50	0,222
chrI	13292974	13293578	neuroPSI:0.26632655	950	+	13292974	13293578	0	2	50,50	0,554
chrI	13292974	13294284	neuroPSI:0.73367345	950	+	13292974	13294284	0	2	50,50	0,1260
chrI	13293694	13294284	neuroPSI:0.23306905	950	+	13293694	13294284	0	2	50,50	0,540
chrIII	13304671	13304842	neuroPSI:0.09862990	950	-	13304671	13304842	0	2	50,50	0,121
chrIII	13304421	13304842	neuroPSI:0.90137010	950	-	13304421	13304842	0	2	50,50	0,371
chrIII	13304421	13304621	neuroPSI:0.09188886	950	-	13304421	13304621	0	2	50,50	0,150
chrV	13370586	13370997	neuroPSI:0.51366397	950	-	13370586	13370997	0	2	50,50	0,361
chrV	13370802	13370997	neuroPSI:0.48633603	950	-	13370802	13370997	0	2	50,50	0,145
chrV	13370586	13370821	neuroPSI:0.54189602	950	-	13370586	13370821	0	2	50,50	0,185
chrI	13410459	13411048	neuroPSI:0.65952381	950	-	13410459	13411048	0	2	50,50	0,539
chrI	13410689	13411048	neuroPSI:0.34047619	950	-	13410689	13411048	0	2	50,50	0,309
chrI	13410459	13410614	neuroPSI:0.40529695	950	-	13410459	13410614	0	2	50,50	0,105
chrV	13467902	13468041	neuroPSI:0.91235535	950	-	13467902	13468041	0	2	50,50	0,89
chrV	13467486	13468041	neuroPSI:0.08764465	950	-	13467486	13468041	0	2	50,50	0,505
chrV	13467486	13467875	neuroPSI:0.93477004	950	-	13467486	13467875	0	2	50,50	0,339
chrX	13489416	13489671	neuroPSI:0.52813318	950	-	13489416	13489671	0	2	50,50	0,205
chrX	13488919	13489671	neuroPSI:0.47186682	950	-	13488919	13489671	0	2	50,50	0,702
chrX	13488919	13489483	neuroPSI:0.53537088	950	-	13488919	13489483	0	2	50,50	0,514
chrIII	13516023	13516577	neuroPSI:0.17201629	950	-	13516023	13516577	0	2	50,50	0,504
chrIII	13515467	13516754	neuroPSI:0.82798371	950	-	13515467	13516754	0	2	50,50	0,1237
chrIII	13515467	13516075	neuroPSI:0.15908059	950	-	13515467	13516075	0	2	50,50	0,558
chrV	13579446	13579696	neuroPSI:0.50725371	950	+	13579446	13579696	0	2	50,50	0,200
chrV	13579446	13580442	neuroPSI:0.49274629	950	+	13579446	13580442	0	2	50,50	0,946
chrV	13579728	13580442	neuroPSI:0.58080410	950	+	13579728	13580442	0	2	50,50	0,664
chrX	13626711	13626965	neuroPSI:0.50307918	950	-	13626711	13626965	0	2	50,50	0,204
chrX	13625847	13626965	neuroPSI:0.49692082	950	-	13625847	13626965	0	2	50,50	0,1068
chrX	13625847	13626679	neuroPSI:0.50325333	950	-	13625847	13626679	0	2	50,50	0,782
chrX	13755919	13757091	neuroPSI:0.10658996	950	+	13755919	13757091	0	2	50,50	0,1122
chrX	13755919	13756893	neuroPSI:0.89341004	950	+	13755919	13756893	0	2	50,50	0,924
chrX	13756861	13757091	neuroPSI:0.90386847	950	+	13756861	13757091	0	2	50,50	0,180
chrIII	13772263	13772779	neuroPSI:0.11684918	950	+	13772263	13772779	0	2	50,50	0,466
chrIII	13772263	13772409	neuroPSI:0.88315082	950	+	13772263	13772409	0	2	50,50	0,96
chrIII	13772400	13772779	neuroPSI:0.90170131	950	+	13772400	13772779	0	2	50,50	0,329
chrII	13938258	13938759	neuroPSI:0.25528309	950	-	13938258	13938759	0	2	50,50	0,451
chrII	13938049	13938759	neuroPSI:0.74471691	950	-	13938049	13938759	0	2	50,50	0,660
chrII	13938049	13938310	neuroPSI:0.21739011	950	-	13938049	13938310	0	2	50,50	0,211
chrIV	14073593	14074674	neuroPSI:0.35446366	950	+	14073593	14074674	0	2	50,50	0,1031
chrIV	14073593	14073977	neuroPSI:0.64553634	950	+	14073593	14073977	0	2	50,50	0,334
chrIV	14074217	14074674	neuroPSI:0.73832160	950	+	14074217	14074674	0	2	50,50	0,407
chrI	14398807	14399672	neuroPSI:0.75338319	950	+	14398807	14399672	0	2	50,50	0,815
chrI	14398807	14399467	neuroPSI:0.24661681	950	+	14398807	14399467	0	2	50,50	0,610
chrI	14399486	14399672	neuroPSI:0.26287426	950	+	14399486	14399672	0	2	50,50	0,136
chrI	14541757	14543389	neuroPSI:0.89428883	950	+	14541757	14543389	0	2	50,50	0,1582
chrI	14541757	14542313	neuroPSI:0.10571117	950	+	14541757	14542313	0	2	50,50	0,506
chrI	14542330	14543389	neuroPSI:0.14076353	950	+	14542330	14543389	0	2	50,50	0,1009
chrI	14567447	14570102	neuroPSI:0.67624673	950	-	14567447	14570102	0	2	50,50	0,2605
chrI	14569890	14570102	neuroPSI:0.32375327	950	-	14569890	14570102	0	2	50,50	0,162
chrI	14567447	14569966	neuroPSI:0.33796376	950	-	14567447	14569966	0	2	50,50	0,2469
chrX	14622423	14622620	neuroPSI:0.77655070	950	+	14622423	14622620	0	2	50,50	0,147
chrX	14622423	14622807	neuroPSI:0.22344930	950	+	14622423	14622807	0	2	50,50	0,334
chrX	14622565	14622807	neuroPSI:0.76340353	950	+	14622565	14622807	0	2	50,50	0,192
chrIV	14789464	14789899	neuroPSI:0.69036656	950	+	14789464	14789899	0	2	50,50	0,385
chrIV	14789464	14790197	neuroPSI:0.30963344	950	+	14789464	14790197	0	2	50,50	0,683
chrIV	14790015	14790197	neuroPSI:0.85952635	950	+	14790015	14790197	0	2	50,50	0,132
chrI	14832082	14834747	neuroPSI:0.78775543	950	-	14832082	14834747	0	2	50,50	0,2615
chrI	14832817	14834747	neuroPSI:0.21224457	950	-	14832817	14834747	0	2	50,50	0,1880
chrI	14832082	14832890	neuroPSI:0.29249228	950	-	14832082	14832890	0	2	50,50	0,758
chrII	15021682	15022459	neuroPSI:0.58960573	950	+	15021682	15022459	0	2	50,50	0,727
chrII	15021682	15021981	neuroPSI:0.41039427	950	+	15021682	15021981	0	2	50,50	0,249
chrII	15022004	15022459	neuroPSI:0.42082755	950	+	15022004	15022459	0	2	50,50	0,405
chrIV	15022442	15023451	neuroPSI:0.40532500	950	+	15022442	15023451	0	2	50,50	0,959
chrIV	15022442	15024178	neuroPSI:0.59467500	950	+	15022442	15024178	0	2	50,50	0,1686
chrIV	15023390	15024178	neuroPSI:0.34685767	950	+	15023390	15024178	0	2	50,50	0,738
chrV	15077042	15078401	neuroPSI:0.78855417	950	+	15077042	15078401	0	2	50,50	0,1309
chrV	15077042	15077624	neuroPSI:0.21144583	950	+	15077042	15077624	0	2	50,50	0,532
chrV	15077554	15078401	neuroPSI:0.22066997	950	+	15077554	15078401	0	2	50,50	0,797
chrX	15190490	15191163	neuroPSI:0.08726204	950	+	15190490	15191163	0	2	50,50	0,623
chrX	15190490	15190646	neuroPSI:0.91273796	950	+	15190490	15190646	0	2	50,50	0,106
chrX	15190613	15191163	neuroPSI:0.92796398	950	+	15190613	15191163	0	2	50,50	0,500
chrX	15469274	15469922	neuroPSI:0.56452588	950	+	15469274	15469922	0	2	50,50	0,598
chrX	15469274	15469530	neuroPSI:0.43547412	950	+	15469274	15469530	0	2	50,50	0,206
chrX	15469470	15469922	neuroPSI:0.41450194	950	+	15469470	15469922	0	2	50,50	0,402
chrX	15572290	15572926	neuroPSI:0.10475480	950	+	15572290	15572926	0	2	50,50	0,586
chrX	15572290	15572563	neuroPSI:0.89524520	950	+	15572290	15572563	0	2	50,50	0,223
chrX	15572545	15572926	neuroPSI:0.89433761	950	+	15572545	15572926	0	2	50,50	0,331
chrX	15845385	15846382	neuroPSI:0.69784946	950	-	15845385	15846382	0	2	50,50	0,947
chrX	15845084	15846382	neuroPSI:0.30215054	950	-	15845084	15846382	0	2	50,50	0,1248
chrX	15845084	15845341	neuroPSI:0.73575557	950	-	15845084	15845341	0	2	50,50	0,207
chrX	15960168	15960450	neuroPSI:0.34372754	950	+	15960168	15960450	0	2	50,50	0,232
chrX	15960168	15961942	neuroPSI:0.65627246	950	+	15960168	15961942	0	2	50,50	0,1724
chrX	15960446	15961942	neuroPSI:0.39103035	950	+	15960446	15961942	0	2	50,50	0,1446
chrV	16025551	16026523	neuroPSI:0.72252797	950	+	16025551	16026523	0	2	50,50	0,922
chrV	16025551	16026212	neuroPSI:0.27747203	950	+	16025551	16026212	0	2	50,50	0,611
chrV	16026139	16026523	neuroPSI:0.32968042	950	+	16026139	16026523	0	2	50,50	0,334
chrX	16077236	16077554	neuroPSI:0.39362519	950	-	16077236	16077554	0	2	50,50	0,268
chrX	16077375	16077554	neuroPSI:0.60637481	950	-	16077375	16077554	0	2	50,50	0,129
chrX	16077236	16077385	neuroPSI:0.54183453	950	-	16077236	16077385	0	2	50,50	0,99
chrV	16767820	16768448	neuroPSI:0.85437744	950	+	16767820	16768448	0	2	50,50	0,578
chrV	16767820	16768055	neuroPSI:0.14562256	950	+	16767820	16768055	0	2	50,50	0,185
chrV	16768030	16768448	neuroPSI:0.18206600	950	+	16768030	16768448	0	2	50,50	0,368
chrX	17059174	17059367	neuroPSI:0.28519417	950	-	17059174	17059367	0	2	50,50	0,143
chrX	17058196	17059367	neuroPSI:0.71480583	950	-	17058196	17059367	0	2	50,50	0,1121
chrX	17058196	17059247	neuroPSI:0.25000000	950	-	17058196	17059247	0	2	50,50	0,1001
chrIV	17107984	17108833	neuroPSI:0.28452381	950	-	17107984	17108833	0	2	50,50	0,799
chrIV	17108502	17108833	neuroPSI:0.71547619	950	-	17108502	17108833	0	2	50,50	0,281
chrIV	17107984	17108529	neuroPSI:0.64774477	950	-	17107984	17108529	0	2	50,50	0,495
chrIV	17271022	17271318	neuroPSI:0.82258712	950	+	17271022	17271318	0	2	50,50	0,246
chrIV	17271022	17271163	neuroPSI:0.17741288	950	+	17271022	17271163	0	2	50,50	0,91
chrIV	17271084	17271318	neuroPSI:0.20761006	950	+	17271084	17271318	0	2	50,50	0,184
chrX	17624153	17624405	neuroPSI:0.10905128	950	-	17624153	17624405	0	2	50,50	0,202
chrX	17623868	17624405	neuroPSI:0.89094872	950	-	17623868	17624405	0	2	50,50	0,487
chrX	17623868	17624195	neuroPSI:0.12520254	950	-	17623868	17624195	0	2	50,50	0,277
chrV	17774718	17775424	neuroPSI:0.23979592	950	-	17774718	17775424	0	2	50,50	0,656
chrV	17775246	17775424	neuroPSI:0.76020408	950	-	17775246	17775424	0	2	50,50	0,128
chrV	17774718	17775176	neuroPSI:0.78564845	950	-	17774718	17775176	0	2	50,50	0,408
chrV	17922064	17923094	neuroPSI:0.87266455	950	+	17922064	17923094	0	2	50,50	0,980
chrV	17922064	17924033	neuroPSI:0.12733545	950	+	17922064	17924033	0	2	50,50	0,1919
chrV	17923167	17924033	neuroPSI:0.81857045	950	+	17923167	17924033	0	2	50,50	0,816
chrV	17988747	17990586	neuroPSI:0.60383065	950	+	17988747	17990586	0	2	50,50	0,1789
chrV	17988747	17989310	neuroPSI:0.39616935	950	+	17988747	17989310	0	2	50,50	0,513
chrV	17989348	17990586	neuroPSI:0.53781513	950	+	17989348	17990586	0	2	50,50	0,1188
chrV	18502845	18503150	neuroPSI:0.65814863	950	+	18502845	18503150	0	2	50,50	0,255
chrV	18502845	18504196	neuroPSI:0.34185137	950	+	18502845	18504196	0	2	50,50	0,1301
chrV	18503116	18504196	neuroPSI:0.66250000	950	+	18503116	18504196	0	2	50,50	0,1030
chrV	18737420	18737749	neuroPSI:0.89374679	950	-	18737420	18737749	0	2	50,50	0,279
chrV	18736882	18737749	neuroPSI:0.10625321	950	-	18736882	18737749	0	2	50,50	0,817
chrV	18736882	18737409	neuroPSI:0.86642264	950	-	18736882	18737409	0	2	50,50	0,477
chrV	18844024	18844304	neuroPSI:0.56649245	950	+	18844024	18844304	0	2	50,50	0,230
chrV	18844024	18845230	neuroPSI:0.43350755	950	+	18844024	18845230	0	2	50,50	0,1156
chrV	18844312	18845230	neuroPSI:0.56784351	950	+	18844312	18845230	0	2	50,50	0,868
chrV	19208553	19209151	neuroPSI:0.22032086	950	-	19208553	19209151	0	2	50,50	0,548
chrV	19208858	19209151	neuroPSI:0.77967914	950	-	19208858	19209151	0	2	50,50	0,243
chrV	19208553	19208893	neuroPSI:0.78952626	950	-	19208553	19208893	0	2	50,50	0,290
chrV	20058651	20059534	neuroPSI:0.59433498	950	-	20058651	20059534	0	2	50,50	0,833
chrV	20057308	20059534	neuroPSI:0.40566502	950	-	20057308	20059534	0	2	50,50	0,2176
chrV	20057308	20058592	neuroPSI:0.54411765	950	-	20057308	20058592	0	2	50,50	0,1234
chrV	20425718	20427421	neuroPSI:0.16978716	950	+	20425718	20427421	0	2	50,50	0,1653
chrV	20425718	20425978	neuroPSI:0.83021284	950	+	20425718	20425978	0	2	50,50	0,210
chrV	20426023	20427421	neuroPSI:0.85526454	950	+	20426023	20427421	0	2	50,50	0,1348
Alt3'/5' SS
track name=neuro_AltSS description='neuro_AltSS'
chrV	7343	7482	neuroPSI:0.18632853	950	-	7343	7482	0	2	50,50	0,89
chrV	7334	7482	neuroPSI:0.81367147	950	-	7334	7482	0	2	50,50	0,98
chrX	59987	60227	neuroPSI:0.65181945	950	+	59987	60227	0	2	50,50	0,190
chrX	60072	60227	neuroPSI:0.34818055	950	+	60072	60227	0	2	50,50	0,105
chrII	70230	70558	neuroPSI:0.15429047	950	+	70230	70558	0	2	50,50	0,278
chrII	70230	70555	neuroPSI:0.84570953	950	+	70230	70555	0	2	50,50	0,275
chrII	85167	85440	neuroPSI:0.60871217	950	+	85167	85440	0	2	50,50	0,223
chrII	85167	85413	neuroPSI:0.39128783	950	+	85167	85413	0	2	50,50	0,196
chrI	100288	100444	neuroPSI:0.28218419	950	-	100288	100444	0	2	50,50	0,106
chrI	100273	100444	neuroPSI:0.71781581	950	-	100273	100444	0	2	50,50	0,121
chrV	116739	117413	neuroPSI:0.46892988	950	+	116739	117413	0	2	50,50	0,624
chrV	116739	117407	neuroPSI:0.53107012	950	+	116739	117407	0	2	50,50	0,618
chrIII	125068	125618	neuroPSI:0.18035714	950	+	125068	125618	0	2	50,50	0,500
chrIII	125011	125671	neuroPSI:0.81964286	950	+	125011	125671	0	2	50,50	0,610
chrV	127788	127944	neuroPSI:0.87189254	950	-	127788	127944	0	2	50,50	0,106
chrV	127802	127944	neuroPSI:0.12810746	950	-	127802	127944	0	2	50,50	0,92
chrV	172881	173028	neuroPSI:0.91177295	950	+	172881	173028	0	2	50,50	0,97
chrV	172881	173019	neuroPSI:0.08822705	950	+	172881	173019	0	2	50,50	0,88
chrX	181884	182092	neuroPSI:0.53845499	950	-	181884	182092	0	2	50,50	0,158
chrX	181884	182044	neuroPSI:0.46154501	950	-	181884	182044	0	2	50,50	0,110
chrI	182576	182721	neuroPSI:0.16819904	950	-	182576	182721	0	2	50,50	0,95
chrI	182566	182721	neuroPSI:0.83180096	950	-	182566	182721	0	2	50,50	0,105
chrIV	193266	193943	neuroPSI:0.80882335	950	+	193266	193943	0	2	50,50	0,627
chrIV	193105	193943	neuroPSI:0.19117665	950	+	193105	193943	0	2	50,50	0,788
chrIV	215255	216920	neuroPSI:0.90103853	950	+	215255	216920	0	2	50,50	0,1615
chrIV	215264	216920	neuroPSI:0.09896147	950	+	215264	216920	0	2	50,50	0,1606
chrII	219885	220115	neuroPSI:0.67412906	950	-	219885	220115	0	2	50,50	0,180
chrII	219885	220100	neuroPSI:0.32587094	950	-	219885	220100	0	2	50,50	0,165
chrV	255899	256046	neuroPSI:0.59591837	950	-	255899	256046	0	2	50,50	0,97
chrV	255899	256049	neuroPSI:0.40408163	950	-	255899	256049	0	2	50,50	0,100
chrII	260588	260908	neuroPSI:0.91283265	950	+	260588	260908	0	2	50,50	0,270
chrII	260580	260908	neuroPSI:0.08716735	950	+	260580	260908	0	2	50,50	0,278
chrIII	345032	345515	neuroPSI:0.46707325	950	-	345032	345515	0	2	50,50	0,433
chrIII	345023	345515	neuroPSI:0.53292675	950	-	345023	345515	0	2	50,50	0,442
chrII	346395	347139	neuroPSI:0.90227487	950	-	346395	347139	0	2	50,50	0,694
chrII	346395	347160	neuroPSI:0.09772513	950	-	346395	347160	0	2	50,50	0,715
chrIII	346818	347088	neuroPSI:0.90604331	950	-	346818	347088	0	2	50,50	0,220
chrIII	346833	347088	neuroPSI:0.09395669	950	-	346833	347088	0	2	50,50	0,205
chrIV	363829	364025	neuroPSI:0.53019324	950	-	363829	364025	0	2	50,50	0,146
chrIV	363823	364025	neuroPSI:0.46980676	950	-	363823	364025	0	2	50,50	0,152
chrIV	389453	389602	neuroPSI:0.05491828	950	-	389453	389602	0	2	50,50	0,99
chrIV	389453	389610	neuroPSI:0.94508172	950	-	389453	389610	0	2	50,50	0,107
chrIV	420946	421411	neuroPSI:0.41964305	950	-	420946	421411	0	2	50,50	0,415
chrIV	420946	421613	neuroPSI:0.58035695	950	-	420946	421613	0	2	50,50	0,617
chrX	427940	428589	neuroPSI:0.53667504	950	-	427940	428589	0	2	50,50	0,599
chrX	427949	428589	neuroPSI:0.46332496	950	-	427949	428589	0	2	50,50	0,590
chrIII	454341	455139	neuroPSI:0.66020232	950	-	454341	455139	0	2	50,50	0,748
chrIII	454341	455094	neuroPSI:0.33979768	950	-	454341	455094	0	2	50,50	0,703
chrIII	473932	474496	neuroPSI:0.49398627	950	+	473932	474496	0	2	50,50	0,514
chrIII	473932	474490	neuroPSI:0.50601373	950	+	473932	474490	0	2	50,50	0,508
chrIV	514135	514580	neuroPSI:0.21573077	950	-	514135	514580	0	2	50,50	0,395
chrIV	514126	514580	neuroPSI:0.78426923	950	-	514126	514580	0	2	50,50	0,404
chrI	536256	536399	neuroPSI:0.14502677	950	+	536256	536399	0	2	50,50	0,93
chrI	536256	536405	neuroPSI:0.85497323	950	+	536256	536405	0	2	50,50	0,99
chrI	683103	683276	neuroPSI:0.83654460	950	+	683103	683276	0	2	50,50	0,123
chrI	683039	683276	neuroPSI:0.16345540	950	+	683039	683276	0	2	50,50	0,187
chrX	704047	704374	neuroPSI:0.55446609	950	-	704047	704374	0	2	50,50	0,277
chrX	704047	704365	neuroPSI:0.44553391	950	-	704047	704365	0	2	50,50	0,268
chrI	845711	845979	neuroPSI:0.82454415	950	-	845711	845979	0	2	50,50	0,218
chrI	845711	845870	neuroPSI:0.17545585	950	-	845711	845870	0	2	50,50	0,109
chrIV	847993	848305	neuroPSI:0.16818179	950	+	847993	848305	0	2	50,50	0,262
chrIV	847993	848296	neuroPSI:0.83181821	950	+	847993	848296	0	2	50,50	0,253
chrI	861869	864447	neuroPSI:0.19293478	950	+	861869	864447	0	2	50,50	0,2528
chrI	861869	864453	neuroPSI:0.80706522	950	+	861869	864453	0	2	50,50	0,2534
chrIV	885371	886491	neuroPSI:0.53592703	950	+	885371	886491	0	2	50,50	0,1070
chrIV	885371	886545	neuroPSI:0.46407297	950	+	885371	886545	0	2	50,50	0,1124
chrIII	897121	897416	neuroPSI:0.59814208	950	+	897121	897416	0	2	50,50	0,245
chrIII	897121	897456	neuroPSI:0.40185792	950	+	897121	897456	0	2	50,50	0,285
chrX	914100	914644	neuroPSI:0.14209434	950	+	914100	914644	0	2	50,50	0,494
chrX	914059	914644	neuroPSI:0.85790566	950	+	914059	914644	0	2	50,50	0,535
chrI	950917	951068	neuroPSI:0.13445231	950	-	950917	951068	0	2	50,50	0,101
chrI	950905	951068	neuroPSI:0.86554769	950	-	950905	951068	0	2	50,50	0,113
chrIII	950902	951244	neuroPSI:0.70577468	950	+	950902	951244	0	2	50,50	0,292
chrIII	950915	951244	neuroPSI:0.29422532	950	+	950915	951244	0	2	50,50	0,279
chrIV	980762	981609	neuroPSI:0.49835559	950	+	980762	981609	0	2	50,50	0,797
chrIV	980729	981609	neuroPSI:0.50164441	950	+	980729	981609	0	2	50,50	0,830
chrIV	984772	985717	neuroPSI:0.42330918	950	-	984772	985717	0	2	50,50	0,895
chrIV	984762	985717	neuroPSI:0.57669082	950	-	984762	985717	0	2	50,50	0,905
chrX	989001	989536	neuroPSI:0.59506742	950	-	989001	989536	0	2	50,50	0,485
chrX	989001	989530	neuroPSI:0.40493258	950	-	989001	989530	0	2	50,50	0,479
chrI	1039122	1039273	neuroPSI:0.75652825	950	+	1039122	1039273	0	2	50,50	0,101
chrI	1039122	1039264	neuroPSI:0.24347175	950	+	1039122	1039264	0	2	50,50	0,92
chrX	1096200	1096886	neuroPSI:0.09974843	950	-	1096200	1096886	0	2	50,50	0,636
chrX	1096262	1096886	neuroPSI:0.90025157	950	-	1096262	1096886	0	2	50,50	0,574
chrII	1121752	1122717	neuroPSI:0.38961979	950	-	1121752	1122717	0	2	50,50	0,915
chrII	1121755	1122717	neuroPSI:0.61038021	950	-	1121755	1122717	0	2	50,50	0,912
chrII	1125306	1125756	neuroPSI:0.10560070	950	+	1125306	1125756	0	2	50,50	0,400
chrII	1125334	1125756	neuroPSI:0.89439930	950	+	1125334	1125756	0	2	50,50	0,372
chrII	1164287	1164481	neuroPSI:0.25670078	950	+	1164287	1164481	0	2	50,50	0,144
chrII	1164287	1164490	neuroPSI:0.74329922	950	+	1164287	1164490	0	2	50,50	0,153
chrV	1260519	1261869	neuroPSI:0.73181812	950	+	1260519	1261869	0	2	50,50	0,1300
chrV	1260519	1261863	neuroPSI:0.26818188	950	+	1260519	1261863	0	2	50,50	0,1294
chrIII	1295716	1296675	neuroPSI:0.52176080	950	+	1295716	1296675	0	2	50,50	0,909
chrIII	1295716	1296208	neuroPSI:0.47823920	950	+	1295716	1296208	0	2	50,50	0,442
chrV	1316851	1317013	neuroPSI:0.81392840	950	-	1316851	1317013	0	2	50,50	0,112
chrV	1316869	1317013	neuroPSI:0.18607160	950	-	1316869	1317013	0	2	50,50	0,94
chrI	1336108	1336258	neuroPSI:0.47305508	950	+	1336108	1336258	0	2	50,50	0,100
chrI	1336066	1336258	neuroPSI:0.52694492	950	+	1336066	1336258	0	2	50,50	0,142
chrII	1346286	1347363	neuroPSI:0.63175770	950	+	1346286	1347363	0	2	50,50	0,1027
chrII	1346286	1347378	neuroPSI:0.36824230	950	+	1346286	1347378	0	2	50,50	0,1042
chrII	1464271	1464611	neuroPSI:0.85807536	950	-	1464271	1464611	0	2	50,50	0,290
chrII	1464418	1464611	neuroPSI:0.14192464	950	-	1464418	1464611	0	2	50,50	0,143
chrI	1491439	1492435	neuroPSI:0.22795238	950	-	1491439	1492435	0	2	50,50	0,946
chrI	1491430	1492435	neuroPSI:0.77204762	950	-	1491430	1492435	0	2	50,50	0,955
chrX	1500808	1501639	neuroPSI:0.22111299	950	-	1500808	1501639	0	2	50,50	0,781
chrX	1500808	1501823	neuroPSI:0.77888701	950	-	1500808	1501823	0	2	50,50	0,965
chrIV	1527392	1527604	neuroPSI:0.21015264	950	-	1527392	1527604	0	2	50,50	0,162
chrIV	1527384	1527604	neuroPSI:0.78984736	950	-	1527384	1527604	0	2	50,50	0,170
chrIII	1534072	1534352	neuroPSI:0.74146451	950	+	1534072	1534352	0	2	50,50	0,230
chrIII	1534174	1534352	neuroPSI:0.25853549	950	+	1534174	1534352	0	2	50,50	0,128
chrV	1629251	1629400	neuroPSI:0.62348178	950	-	1629251	1629400	0	2	50,50	0,99
chrV	1629251	1629404	neuroPSI:0.37651822	950	-	1629251	1629404	0	2	50,50	0,103
chrIV	1641862	1642018	neuroPSI:0.31992797	950	-	1641862	1642018	0	2	50,50	0,106
chrIV	1641840	1641996	neuroPSI:0.68007203	950	-	1641840	1641996	0	2	50,50	0,106
chrII	1656387	1656531	neuroPSI:0.05129974	950	-	1656387	1656531	0	2	50,50	0,94
chrII	1656387	1656535	neuroPSI:0.94870026	950	-	1656387	1656535	0	2	50,50	0,98
chrIII	1666972	1667199	neuroPSI:0.87004464	950	-	1666972	1667199	0	2	50,50	0,177
chrIII	1666981	1667199	neuroPSI:0.12995536	950	-	1666981	1667199	0	2	50,50	0,168
chrI	1710946	1712759	neuroPSI:0.10228983	950	+	1710946	1712759	0	2	50,50	0,1763
chrI	1710946	1712765	neuroPSI:0.89771017	950	+	1710946	1712765	0	2	50,50	0,1769
chrIV	1741382	1741535	neuroPSI:0.78220952	950	-	1741382	1741535	0	2	50,50	0,103
chrIV	1741382	1741529	neuroPSI:0.21779048	950	-	1741382	1741529	0	2	50,50	0,97
chrII	1777062	1777217	neuroPSI:0.50944302	950	+	1777062	1777217	0	2	50,50	0,105
chrII	1777067	1777217	neuroPSI:0.49055698	950	+	1777067	1777217	0	2	50,50	0,100
chrX	1777498	1777775	neuroPSI:0.93606639	950	-	1777498	1777775	0	2	50,50	0,227
chrX	1777498	1777854	neuroPSI:0.06393361	950	-	1777498	1777854	0	2	50,50	0,306
chrIII	1798786	1799749	neuroPSI:0.12236079	950	+	1798786	1799749	0	2	50,50	0,913
chrIII	1798786	1799557	neuroPSI:0.87763921	950	+	1798786	1799557	0	2	50,50	0,721
chrIII	1813052	1814446	neuroPSI:0.93659009	950	-	1813052	1814446	0	2	50,50	0,1344
chrIII	1813061	1814446	neuroPSI:0.06340991	950	-	1813061	1814446	0	2	50,50	0,1335
chrIII	1879521	1880234	neuroPSI:0.66903833	950	+	1879521	1880234	0	2	50,50	0,663
chrIII	1879497	1880234	neuroPSI:0.33096167	950	+	1879497	1880234	0	2	50,50	0,687
chrI	1953574	1955319	neuroPSI:0.66231506	950	-	1953574	1955319	0	2	50,50	0,1695
chrI	1953499	1955319	neuroPSI:0.33768494	950	-	1953499	1955319	0	2	50,50	0,1770
chrV	1991777	1992769	neuroPSI:0.82995161	950	-	1991777	1992769	0	2	50,50	0,942
chrV	1991777	1992685	neuroPSI:0.17004839	950	-	1991777	1992685	0	2	50,50	0,858
chrIII	2012775	2013750	neuroPSI:0.56081349	950	-	2012775	2013750	0	2	50,50	0,925
chrIII	2012775	2013459	neuroPSI:0.43918651	950	-	2012775	2013459	0	2	50,50	0,634
chrX	2017263	2017680	neuroPSI:0.25738699	950	+	2017263	2017680	0	2	50,50	0,367
chrX	2017228	2017680	neuroPSI:0.74261301	950	+	2017228	2017680	0	2	50,50	0,402
chrI	2061832	2061986	neuroPSI:0.89778325	950	-	2061832	2061986	0	2	50,50	0,104
chrI	2061832	2061977	neuroPSI:0.10221675	950	-	2061832	2061977	0	2	50,50	0,95
chrV	2062467	2063380	neuroPSI:0.57352494	950	-	2062467	2063380	0	2	50,50	0,863
chrV	2062458	2063380	neuroPSI:0.42647506	950	-	2062458	2063380	0	2	50,50	0,872
chrI	2068095	2068294	neuroPSI:0.87194496	950	+	2068095	2068294	0	2	50,50	0,149
chrI	2068095	2068306	neuroPSI:0.12805504	950	+	2068095	2068306	0	2	50,50	0,161
chrI	2068777	2068918	neuroPSI:0.44982735	950	+	2068777	2068918	0	2	50,50	0,91
chrI	2068777	2068927	neuroPSI:0.55017265	950	+	2068777	2068927	0	2	50,50	0,100
chrI	2203814	2205262	neuroPSI:0.24023845	950	+	2203814	2205262	0	2	50,50	0,1398
chrI	2203814	2204974	neuroPSI:0.75976155	950	+	2203814	2204974	0	2	50,50	0,1110
chrV	2211672	2211819	neuroPSI:0.16812810	950	-	2211672	2211819	0	2	50,50	0,97
chrV	2211672	2211823	neuroPSI:0.83187190	950	-	2211672	2211823	0	2	50,50	0,101
chrII	2230492	2230724	neuroPSI:0.72619048	950	-	2230492	2230724	0	2	50,50	0,182
chrII	2230492	2230637	neuroPSI:0.27380952	950	-	2230492	2230637	0	2	50,50	0,95
chrIV	2312859	2313840	neuroPSI:0.92591022	950	-	2312859	2313840	0	2	50,50	0,931
chrIV	2312857	2313840	neuroPSI:0.07408978	950	-	2312857	2313840	0	2	50,50	0,933
chrI	2316339	2316489	neuroPSI:0.58744939	950	+	2316339	2316489	0	2	50,50	0,100
chrI	2316339	2316495	neuroPSI:0.41255061	950	+	2316339	2316495	0	2	50,50	0,106
chrIII	2376373	2376555	neuroPSI:0.18844649	950	+	2376373	2376555	0	2	50,50	0,132
chrIII	2376373	2376564	neuroPSI:0.81155351	950	+	2376373	2376564	0	2	50,50	0,141
chrIV	2386632	2386778	neuroPSI:0.54940148	950	+	2386632	2386778	0	2	50,50	0,96
chrIV	2386605	2386772	neuroPSI:0.45059852	950	+	2386605	2386772	0	2	50,50	0,117
chrI	2415229	2415891	neuroPSI:0.92817529	950	+	2415229	2415891	0	2	50,50	0,612
chrI	2415321	2415891	neuroPSI:0.07182471	950	+	2415321	2415891	0	2	50,50	0,520
chrIII	2449815	2449962	neuroPSI:0.59711779	950	-	2449815	2449962	0	2	50,50	0,97
chrIII	2449809	2449962	neuroPSI:0.40288221	950	-	2449809	2449962	0	2	50,50	0,103
chrX	2477326	2478503	neuroPSI:0.31779065	950	-	2477326	2478503	0	2	50,50	0,1127
chrX	2477392	2478503	neuroPSI:0.68220935	950	-	2477392	2478503	0	2	50,50	0,1061
chrX	2509820	2509976	neuroPSI:0.91040647	950	-	2509820	2509976	0	2	50,50	0,106
chrX	2509811	2509976	neuroPSI:0.08959353	950	-	2509811	2509976	0	2	50,50	0,115
chrIII	2541403	2541788	neuroPSI:0.90149505	950	+	2541403	2541788	0	2	50,50	0,335
chrIII	2541403	2541782	neuroPSI:0.09850495	950	+	2541403	2541782	0	2	50,50	0,329
chrIII	2544595	2544890	neuroPSI:0.38330792	950	+	2544595	2544890	0	2	50,50	0,245
chrIII	2544595	2544884	neuroPSI:0.61669208	950	+	2544595	2544884	0	2	50,50	0,239
chrIII	2559421	2560373	neuroPSI:0.40868233	950	+	2559421	2560373	0	2	50,50	0,902
chrIII	2559426	2560373	neuroPSI:0.59131767	950	+	2559426	2560373	0	2	50,50	0,897
chrII	2572590	2573578	neuroPSI:0.06645113	950	+	2572590	2573578	0	2	50,50	0,938
chrII	2572590	2573485	neuroPSI:0.93354887	950	+	2572590	2573485	0	2	50,50	0,845
chrI	2601818	2602021	neuroPSI:0.34246874	950	+	2601818	2602021	0	2	50,50	0,153
chrI	2601733	2602021	neuroPSI:0.65753126	950	+	2601733	2602021	0	2	50,50	0,238
chrI	2669161	2669680	neuroPSI:0.68346899	950	+	2669161	2669680	0	2	50,50	0,469
chrI	2669161	2669683	neuroPSI:0.31653101	950	+	2669161	2669683	0	2	50,50	0,472
chrI	2670148	2670296	neuroPSI:0.74103716	950	+	2670148	2670296	0	2	50,50	0,98
chrI	2670148	2670302	neuroPSI:0.25896284	950	+	2670148	2670302	0	2	50,50	0,104
chrIII	2709676	2710727	neuroPSI:0.90335794	950	-	2709676	2710727	0	2	50,50	0,1001
chrIII	2709667	2710727	neuroPSI:0.09664206	950	-	2709667	2710727	0	2	50,50	0,1010
chrX	2712483	2712631	neuroPSI:0.31901245	950	-	2712483	2712631	0	2	50,50	0,98
chrX	2712489	2712631	neuroPSI:0.68098755	950	-	2712489	2712631	0	2	50,50	0,92
chrI	2765627	2765787	neuroPSI:0.85191441	950	-	2765627	2765787	0	2	50,50	0,110
chrI	2765645	2765787	neuroPSI:0.14808559	950	-	2765645	2765787	0	2	50,50	0,92
chrIII	2782901	2783963	neuroPSI:0.53808491	950	-	2782901	2783963	0	2	50,50	0,1012
chrIII	2782901	2783984	neuroPSI:0.46191509	950	-	2782901	2783984	0	2	50,50	0,1033
chrX	2812785	2812931	neuroPSI:0.87354418	950	-	2812785	2812931	0	2	50,50	0,96
chrX	2812762	2812931	neuroPSI:0.12645582	950	-	2812762	2812931	0	2	50,50	0,119
chrIII	2824613	2825745	neuroPSI:0.46474582	950	+	2824613	2825745	0	2	50,50	0,1082
chrIII	2824620	2825745	neuroPSI:0.53525418	950	+	2824620	2825745	0	2	50,50	0,1075
chrI	2845920	2846764	neuroPSI:0.51437632	950	+	2845920	2846764	0	2	50,50	0,794
chrI	2846103	2846764	neuroPSI:0.48562368	950	+	2846103	2846764	0	2	50,50	0,611
chrII	2848259	2848400	neuroPSI:0.37092391	950	-	2848259	2848400	0	2	50,50	0,91
chrII	2848250	2848400	neuroPSI:0.62907609	950	-	2848250	2848400	0	2	50,50	0,100
chrI	2849297	2849728	neuroPSI:0.24528216	950	+	2849297	2849728	0	2	50,50	0,381
chrI	2849336	2849728	neuroPSI:0.75471784	950	+	2849336	2849728	0	2	50,50	0,342
chrI	2866555	2867293	neuroPSI:0.13909774	950	+	2866555	2867293	0	2	50,50	0,688
chrI	2866561	2867293	neuroPSI:0.86090226	950	+	2866561	2867293	0	2	50,50	0,682
chrI	2872703	2873164	neuroPSI:0.87367974	950	-	2872703	2873164	0	2	50,50	0,411
chrI	2872712	2873164	neuroPSI:0.12632026	950	-	2872712	2873164	0	2	50,50	0,402
chrIV	2875291	2879311	neuroPSI:0.21918678	950	-	2875291	2879311	0	2	50,50	0,3970
chrIV	2875333	2879311	neuroPSI:0.78081322	950	-	2875333	2879311	0	2	50,50	0,3928
chrIV	2910149	2910294	neuroPSI:0.26510989	950	-	2910149	2910294	0	2	50,50	0,95
chrIV	2910149	2910303	neuroPSI:0.73489011	950	-	2910149	2910303	0	2	50,50	0,104
chrI	2942970	2943120	neuroPSI:0.18779080	950	+	2942970	2943120	0	2	50,50	0,100
chrI	2942970	2943126	neuroPSI:0.81220920	950	+	2942970	2943126	0	2	50,50	0,106
chrIII	2957404	2958276	neuroPSI:0.13453537	950	+	2957404	2958276	0	2	50,50	0,822
chrIII	2957404	2958282	neuroPSI:0.86546463	950	+	2957404	2958282	0	2	50,50	0,828
chrIV	3013877	3014028	neuroPSI:0.07575181	950	+	3013877	3014028	0	2	50,50	0,101
chrIV	3013877	3014022	neuroPSI:0.92424819	950	+	3013877	3014022	0	2	50,50	0,95
chrIV	3034938	3035080	neuroPSI:0.13417478	950	-	3034938	3035080	0	2	50,50	0,92
chrIV	3034929	3035080	neuroPSI:0.86582522	950	-	3034929	3035080	0	2	50,50	0,101
chrX	3042427	3043173	neuroPSI:0.49741316	950	-	3042427	3043173	0	2	50,50	0,696
chrX	3042427	3043143	neuroPSI:0.50258684	950	-	3042427	3043143	0	2	50,50	0,666
chrV	3051767	3051926	neuroPSI:0.18539952	950	+	3051767	3051926	0	2	50,50	0,109
chrV	3051783	3051926	neuroPSI:0.81460048	950	+	3051783	3051926	0	2	50,50	0,93
chrII	3074579	3075771	neuroPSI:0.92461122	950	-	3074579	3075771	0	2	50,50	0,1142
chrII	3074579	3075776	neuroPSI:0.07538878	950	-	3074579	3075776	0	2	50,50	0,1147
chrX	3100559	3101130	neuroPSI:0.92799501	950	-	3100559	3101130	0	2	50,50	0,521
chrX	3100504	3101130	neuroPSI:0.07200499	950	-	3100504	3101130	0	2	50,50	0,576
chrI	3160057	3160204	neuroPSI:0.86440847	950	-	3160057	3160204	0	2	50,50	0,97
chrI	3160063	3160204	neuroPSI:0.13559153	950	-	3160063	3160204	0	2	50,50	0,91
chrIV	3214184	3214556	neuroPSI:0.36220790	950	+	3214184	3214556	0	2	50,50	0,322
chrIV	3214184	3214562	neuroPSI:0.63779210	950	+	3214184	3214562	0	2	50,50	0,328
chrI	3220755	3220990	neuroPSI:0.41473949	950	-	3220755	3220990	0	2	50,50	0,185
chrI	3220779	3220990	neuroPSI:0.58526051	950	-	3220779	3220990	0	2	50,50	0,161
chrII	3263006	3264248	neuroPSI:0.29469676	950	+	3263006	3264248	0	2	50,50	0,1192
chrII	3263024	3264248	neuroPSI:0.70530324	950	+	3263024	3264248	0	2	50,50	0,1174
chrI	3264427	3264574	neuroPSI:0.19275942	950	-	3264427	3264574	0	2	50,50	0,97
chrI	3264427	3264579	neuroPSI:0.80724058	950	-	3264427	3264579	0	2	50,50	0,102
chrII	3303459	3303693	neuroPSI:0.10974175	950	-	3303459	3303693	0	2	50,50	0,184
chrII	3303449	3303693	neuroPSI:0.89025825	950	-	3303449	3303693	0	2	50,50	0,194
chrII	3306448	3306686	neuroPSI:0.37864820	950	-	3306448	3306686	0	2	50,50	0,188
chrII	3306453	3306686	neuroPSI:0.62135180	950	-	3306453	3306686	0	2	50,50	0,183
chrIV	3337460	3337612	neuroPSI:0.67563153	950	-	3337460	3337612	0	2	50,50	0,102
chrIV	3337460	3337609	neuroPSI:0.32436847	950	-	3337460	3337609	0	2	50,50	0,99
chrI	3340549	3340697	neuroPSI:0.80238601	950	-	3340549	3340697	0	2	50,50	0,98
chrI	3340555	3340697	neuroPSI:0.19761399	950	-	3340555	3340697	0	2	50,50	0,92
chrIII	3402927	3403131	neuroPSI:0.06401650	950	-	3402927	3403131	0	2	50,50	0,154
chrIII	3402927	3403203	neuroPSI:0.93598350	950	-	3402927	3403203	0	2	50,50	0,226
chrII	3424710	3424860	neuroPSI:0.67857143	950	-	3424710	3424860	0	2	50,50	0,100
chrII	3424701	3424860	neuroPSI:0.32142857	950	-	3424701	3424860	0	2	50,50	0,109
chrX	3453066	3453294	neuroPSI:0.32069251	950	-	3453066	3453294	0	2	50,50	0,178
chrX	3453066	3453279	neuroPSI:0.67930749	950	-	3453066	3453279	0	2	50,50	0,163
chrX	3482369	3482536	neuroPSI:0.52421053	950	+	3482369	3482536	0	2	50,50	0,117
chrX	3482369	3482530	neuroPSI:0.47578947	950	+	3482369	3482530	0	2	50,50	0,111
chrIII	3502017	3502184	neuroPSI:0.71292569	950	-	3502017	3502184	0	2	50,50	0,117
chrIII	3502010	3502184	neuroPSI:0.28707431	950	-	3502010	3502184	0	2	50,50	0,124
chrII	3507559	3508525	neuroPSI:0.74708779	950	+	3507559	3508525	0	2	50,50	0,916
chrII	3507559	3508519	neuroPSI:0.25291221	950	+	3507559	3508519	0	2	50,50	0,910
chrIII	3523642	3523875	neuroPSI:0.90104551	950	-	3523642	3523875	0	2	50,50	0,183
chrIII	3523642	3523917	neuroPSI:0.09895449	950	-	3523642	3523917	0	2	50,50	0,225
chrI	3526557	3526714	neuroPSI:0.81103803	950	-	3526557	3526714	0	2	50,50	0,107
chrI	3526557	3526705	neuroPSI:0.18896197	950	-	3526557	3526705	0	2	50,50	0,98
chrX	3530612	3530972	neuroPSI:0.20228935	950	+	3530612	3530972	0	2	50,50	0,310
chrX	3530594	3530972	neuroPSI:0.79771065	950	+	3530594	3530972	0	2	50,50	0,328
chrIV	3617191	3617774	neuroPSI:0.59026688	950	-	3617191	3617774	0	2	50,50	0,533
chrIV	3617191	3617338	neuroPSI:0.40973312	950	-	3617191	3617338	0	2	50,50	0,97
chrIII	3726295	3726436	neuroPSI:0.73918726	950	-	3726295	3726436	0	2	50,50	0,91
chrIII	3726284	3726436	neuroPSI:0.26081274	950	-	3726284	3726436	0	2	50,50	0,102
chrIII	3728214	3728356	neuroPSI:0.09880383	950	-	3728214	3728356	0	2	50,50	0,92
chrIII	3728207	3728356	neuroPSI:0.90119617	950	-	3728207	3728356	0	2	50,50	0,99
chrIV	3732533	3733684	neuroPSI:0.08878090	950	+	3732533	3733684	0	2	50,50	0,1101
chrIV	3732686	3733684	neuroPSI:0.91121910	950	+	3732686	3733684	0	2	50,50	0,948
chrII	3760721	3760860	neuroPSI:0.89144317	950	-	3760721	3760860	0	2	50,50	0,89
chrII	3760703	3760860	neuroPSI:0.10855683	950	-	3760703	3760860	0	2	50,50	0,107
chrIV	3803587	3803755	neuroPSI:0.44118047	950	+	3803587	3803755	0	2	50,50	0,118
chrIV	3803583	3803755	neuroPSI:0.55881953	950	+	3803583	3803755	0	2	50,50	0,122
chrIII	3830878	3831113	neuroPSI:0.25431655	950	-	3830878	3831113	0	2	50,50	0,185
chrIII	3830878	3831058	neuroPSI:0.74568345	950	-	3830878	3831058	0	2	50,50	0,130
chrIII	3858995	3859142	neuroPSI:0.59606481	950	-	3858995	3859142	0	2	50,50	0,97
chrIII	3858995	3859145	neuroPSI:0.40393519	950	-	3858995	3859145	0	2	50,50	0,100
chrIII	3870227	3870375	neuroPSI:0.57295650	950	-	3870227	3870375	0	2	50,50	0,98
chrIII	3870218	3870375	neuroPSI:0.42704350	950	-	3870218	3870375	0	2	50,50	0,107
chrII	3926035	3926966	neuroPSI:0.24178514	950	-	3926035	3926966	0	2	50,50	0,881
chrII	3926029	3926966	neuroPSI:0.75821486	950	-	3926029	3926966	0	2	50,50	0,887
chrIII	3965827	3966416	neuroPSI:0.86742306	950	-	3965827	3966416	0	2	50,50	0,539
chrIII	3965836	3966416	neuroPSI:0.13257694	950	-	3965836	3966416	0	2	50,50	0,530
chrI	4002458	4002601	neuroPSI:0.21109529	950	-	4002458	4002601	0	2	50,50	0,93
chrI	4002458	4002646	neuroPSI:0.78890471	950	-	4002458	4002646	0	2	50,50	0,138
chrIV	4005921	4006639	neuroPSI:0.91509468	950	-	4005921	4006639	0	2	50,50	0,668
chrIV	4005850	4006639	neuroPSI:0.08490532	950	-	4005850	4006639	0	2	50,50	0,739
chrV	4039184	4039335	neuroPSI:0.08030163	950	+	4039184	4039335	0	2	50,50	0,101
chrV	4039186	4039335	neuroPSI:0.91969837	950	+	4039186	4039335	0	2	50,50	0,99
chrI	4117181	4117325	neuroPSI:0.69137466	950	+	4117181	4117325	0	2	50,50	0,94
chrI	4117181	4117333	neuroPSI:0.30862534	950	+	4117181	4117333	0	2	50,50	0,102
chrI	4136468	4136819	neuroPSI:0.17548387	950	-	4136468	4136819	0	2	50,50	0,301
chrI	4136468	4136944	neuroPSI:0.82451613	950	-	4136468	4136944	0	2	50,50	0,426
chrIII	4139962	4140749	neuroPSI:0.53857281	950	+	4139962	4140749	0	2	50,50	0,737
chrIII	4139962	4140758	neuroPSI:0.46142719	950	+	4139962	4140758	0	2	50,50	0,746
chrIII	4144972	4146342	neuroPSI:0.36835260	950	+	4144972	4146342	0	2	50,50	0,1320
chrIII	4144917	4146342	neuroPSI:0.63164740	950	+	4144917	4146342	0	2	50,50	0,1375
chrX	4150210	4150357	neuroPSI:0.64293205	950	-	4150210	4150357	0	2	50,50	0,97
chrX	4150216	4150357	neuroPSI:0.35706795	950	-	4150216	4150357	0	2	50,50	0,91
chrIII	4179515	4180207	neuroPSI:0.09587347	950	-	4179515	4180207	0	2	50,50	0,642
chrIII	4179515	4180223	neuroPSI:0.90412653	950	-	4179515	4180223	0	2	50,50	0,658
chrV	4188482	4188663	neuroPSI:0.53323193	950	+	4188482	4188663	0	2	50,50	0,131
chrV	4188482	4188658	neuroPSI:0.46676807	950	+	4188482	4188658	0	2	50,50	0,126
chrX	4211900	4212057	neuroPSI:0.92279916	950	-	4211900	4212057	0	2	50,50	0,107
chrX	4211900	4212052	neuroPSI:0.07720084	950	-	4211900	4212052	0	2	50,50	0,102
chrX	4246794	4246937	neuroPSI:0.65223249	950	-	4246794	4246937	0	2	50,50	0,93
chrX	4246786	4246937	neuroPSI:0.34776751	950	-	4246786	4246937	0	2	50,50	0,101
chrIII	4250954	4251420	neuroPSI:0.65123457	950	-	4250954	4251420	0	2	50,50	0,416
chrIII	4250960	4251420	neuroPSI:0.34876543	950	-	4250960	4251420	0	2	50,50	0,410
chrIII	4277321	4277854	neuroPSI:0.24558940	950	-	4277321	4277854	0	2	50,50	0,483
chrIII	4277330	4277854	neuroPSI:0.75441060	950	-	4277330	4277854	0	2	50,50	0,474
chrIII	4278742	4278905	neuroPSI:0.25089859	950	-	4278742	4278905	0	2	50,50	0,113
chrIII	4278742	4278983	neuroPSI:0.74910141	950	-	4278742	4278983	0	2	50,50	0,191
chrIV	4296756	4296907	neuroPSI:0.44200345	950	-	4296756	4296907	0	2	50,50	0,101
chrIV	4296756	4296904	neuroPSI:0.55799655	950	-	4296756	4296904	0	2	50,50	0,98
chrI	4304302	4305508	neuroPSI:0.35286751	950	+	4304302	4305508	0	2	50,50	0,1156
chrI	4303996	4305508	neuroPSI:0.64713249	950	+	4303996	4305508	0	2	50,50	0,1462
chrII	4336220	4337122	neuroPSI:0.49978605	950	+	4336220	4337122	0	2	50,50	0,852
chrII	4336220	4337113	neuroPSI:0.50021395	950	+	4336220	4337113	0	2	50,50	0,843
chrV	4372843	4373001	neuroPSI:0.79627156	950	+	4372843	4373001	0	2	50,50	0,108
chrV	4372843	4372986	neuroPSI:0.20372844	950	+	4372843	4372986	0	2	50,50	0,93
chrX	4411679	4411831	neuroPSI:0.29707439	950	-	4411679	4411831	0	2	50,50	0,102
chrX	4411688	4411831	neuroPSI:0.70292561	950	-	4411688	4411831	0	2	50,50	0,93
chrIV	4445374	4445513	neuroPSI:0.17161017	950	-	4445374	4445513	0	2	50,50	0,89
chrIV	4445368	4445513	neuroPSI:0.82838983	950	-	4445368	4445513	0	2	50,50	0,95
chrIII	4447551	4449021	neuroPSI:0.11811167	950	-	4447551	4449021	0	2	50,50	0,1420
chrIII	4447524	4449021	neuroPSI:0.88188833	950	-	4447524	4449021	0	2	50,50	0,1447
chrII	4458495	4458642	neuroPSI:0.69192972	950	-	4458495	4458642	0	2	50,50	0,97
chrII	4458495	4458645	neuroPSI:0.30807028	950	-	4458495	4458645	0	2	50,50	0,100
chrX	4496080	4496305	neuroPSI:0.05807328	950	-	4496080	4496305	0	2	50,50	0,175
chrX	4496098	4496305	neuroPSI:0.94192672	950	-	4496098	4496305	0	2	50,50	0,157
chrI	4500541	4500696	neuroPSI:0.42181467	950	+	4500541	4500696	0	2	50,50	0,105
chrI	4500541	4500699	neuroPSI:0.57818533	950	+	4500541	4500699	0	2	50,50	0,108
chrIV	4515425	4515731	neuroPSI:0.10160439	950	-	4515425	4515731	0	2	50,50	0,256
chrIV	4515425	4515596	neuroPSI:0.89839561	950	-	4515425	4515596	0	2	50,50	0,121
chrII	4521646	4522024	neuroPSI:0.64630682	950	+	4521646	4522024	0	2	50,50	0,328
chrII	4521668	4522024	neuroPSI:0.35369318	950	+	4521668	4522024	0	2	50,50	0,306
chrI	4526653	4527791	neuroPSI:0.84661472	950	-	4526653	4527791	0	2	50,50	0,1088
chrI	4526662	4527791	neuroPSI:0.15338528	950	-	4526662	4527791	0	2	50,50	0,1079
chrIII	4556461	4556896	neuroPSI:0.17447917	950	+	4556461	4556896	0	2	50,50	0,385
chrIII	4556461	4556902	neuroPSI:0.82552083	950	+	4556461	4556902	0	2	50,50	0,391
chrIII	4559532	4559687	neuroPSI:0.70881552	950	+	4559532	4559687	0	2	50,50	0,105
chrIII	4559532	4559680	neuroPSI:0.29118448	950	+	4559532	4559680	0	2	50,50	0,98
chrIV	4585072	4585357	neuroPSI:0.09820393	950	+	4585072	4585357	0	2	50,50	0,235
chrIV	4585072	4585366	neuroPSI:0.90179607	950	+	4585072	4585366	0	2	50,50	0,244
chrIII	4594229	4594373	neuroPSI:0.94460007	950	-	4594229	4594373	0	2	50,50	0,94
chrIII	4594223	4594373	neuroPSI:0.05539993	950	-	4594223	4594373	0	2	50,50	0,100
chrV	4606092	4606815	neuroPSI:0.93708466	950	-	4606092	4606815	0	2	50,50	0,673
chrV	4606098	4606815	neuroPSI:0.06291534	950	-	4606098	4606815	0	2	50,50	0,667
chrI	4612972	4613328	neuroPSI:0.16186989	950	-	4612972	4613328	0	2	50,50	0,306
chrI	4612966	4613328	neuroPSI:0.83813011	950	-	4612966	4613328	0	2	50,50	0,312
chrII	4634527	4635381	neuroPSI:0.72430073	950	-	4634527	4635381	0	2	50,50	0,804
chrII	4634527	4635330	neuroPSI:0.27569927	950	-	4634527	4635330	0	2	50,50	0,753
chrII	4652600	4653102	neuroPSI:0.39170040	950	+	4652600	4653102	0	2	50,50	0,452
chrII	4652600	4653111	neuroPSI:0.60829960	950	+	4652600	4653111	0	2	50,50	0,461
chrI	4656730	4657261	neuroPSI:0.94180162	950	+	4656730	4657261	0	2	50,50	0,481
chrI	4656730	4657255	neuroPSI:0.05819838	950	+	4656730	4657255	0	2	50,50	0,475
chrIII	4660878	4661027	neuroPSI:0.55010191	950	+	4660878	4661027	0	2	50,50	0,99
chrIII	4660878	4661057	neuroPSI:0.44989809	950	+	4660878	4661057	0	2	50,50	0,129
chrV	4687138	4687289	neuroPSI:0.77541604	950	+	4687138	4687289	0	2	50,50	0,101
chrV	4687138	4687280	neuroPSI:0.22458396	950	+	4687138	4687280	0	2	50,50	0,92
chrV	4696534	4696688	neuroPSI:0.69759570	950	-	4696534	4696688	0	2	50,50	0,104
chrV	4696525	4696688	neuroPSI:0.30240430	950	-	4696525	4696688	0	2	50,50	0,113
chrII	4702845	4703014	neuroPSI:0.79566517	950	+	4702845	4703014	0	2	50,50	0,119
chrII	4702845	4703034	neuroPSI:0.20433483	950	+	4702845	4703034	0	2	50,50	0,139
chrX	4710212	4710360	neuroPSI:0.58238710	950	-	4710212	4710360	0	2	50,50	0,98
chrX	4710212	4710366	neuroPSI:0.41761290	950	-	4710212	4710366	0	2	50,50	0,104
chrIV	4712343	4712504	neuroPSI:0.36399514	950	-	4712343	4712504	0	2	50,50	0,111
chrIV	4712343	4712490	neuroPSI:0.63600486	950	-	4712343	4712490	0	2	50,50	0,97
chrIII	4713048	4713240	neuroPSI:0.68932630	950	-	4713048	4713240	0	2	50,50	0,142
chrIII	4713054	4713240	neuroPSI:0.31067370	950	-	4713054	4713240	0	2	50,50	0,136
chrIV	4750621	4750764	neuroPSI:0.06990847	950	+	4750621	4750764	0	2	50,50	0,93
chrIV	4750621	4750769	neuroPSI:0.93009153	950	+	4750621	4750769	0	2	50,50	0,98
chrI	4771439	4771653	neuroPSI:0.42264511	950	-	4771439	4771653	0	2	50,50	0,164
chrI	4771439	4771670	neuroPSI:0.57735489	950	-	4771439	4771670	0	2	50,50	0,181
chrI	4803222	4804040	neuroPSI:0.37525482	950	+	4803222	4804040	0	2	50,50	0,768
chrI	4803222	4804020	neuroPSI:0.62474518	950	+	4803222	4804020	0	2	50,50	0,748
chrIII	4807098	4807733	neuroPSI:0.38800578	950	-	4807098	4807733	0	2	50,50	0,585
chrIII	4807092	4807733	neuroPSI:0.61199422	950	-	4807092	4807733	0	2	50,50	0,591
chrI	4849340	4849596	neuroPSI:0.68018180	950	+	4849340	4849596	0	2	50,50	0,206
chrI	4849310	4849596	neuroPSI:0.31981820	950	+	4849310	4849596	0	2	50,50	0,236
chrI	4853777	4853938	neuroPSI:0.76556172	950	-	4853777	4853938	0	2	50,50	0,111
chrI	4853789	4853938	neuroPSI:0.23443828	950	-	4853789	4853938	0	2	50,50	0,99
chrX	4855365	4855765	neuroPSI:0.10580008	950	-	4855365	4855765	0	2	50,50	0,350
chrX	4855371	4855765	neuroPSI:0.89419992	950	-	4855371	4855765	0	2	50,50	0,344
chrIII	4901421	4902098	neuroPSI:0.20783784	950	+	4901421	4902098	0	2	50,50	0,627
chrIII	4901421	4902104	neuroPSI:0.79216216	950	+	4901421	4902104	0	2	50,50	0,633
chrX	4908320	4908479	neuroPSI:0.05906938	950	+	4908320	4908479	0	2	50,50	0,109
chrX	4908320	4908473	neuroPSI:0.94093062	950	+	4908320	4908473	0	2	50,50	0,103
chrIII	4912117	4912263	neuroPSI:0.16599702	950	-	4912117	4912263	0	2	50,50	0,96
chrIII	4912117	4912258	neuroPSI:0.83400298	950	-	4912117	4912258	0	2	50,50	0,91
chrI	4921400	4922047	neuroPSI:0.25783384	950	-	4921400	4922047	0	2	50,50	0,597
chrI	4921394	4922047	neuroPSI:0.74216616	950	-	4921394	4922047	0	2	50,50	0,603
chrIII	4933270	4933425	neuroPSI:0.20643501	950	+	4933270	4933425	0	2	50,50	0,105
chrIII	4933270	4933431	neuroPSI:0.79356499	950	+	4933270	4933431	0	2	50,50	0,111
chrII	4951497	4951641	neuroPSI:0.23667166	950	+	4951497	4951641	0	2	50,50	0,94
chrII	4951497	4951650	neuroPSI:0.76332834	950	+	4951497	4951650	0	2	50,50	0,103
chrII	4952644	4953210	neuroPSI:0.18100526	950	+	4952644	4953210	0	2	50,50	0,516
chrII	4952644	4952889	neuroPSI:0.81899474	950	+	4952644	4952889	0	2	50,50	0,195
chrII	4996873	4997024	neuroPSI:0.39027825	950	+	4996873	4997024	0	2	50,50	0,101
chrII	4996873	4997043	neuroPSI:0.60972175	950	+	4996873	4997043	0	2	50,50	0,120
chrX	5019400	5019560	neuroPSI:0.10533810	950	+	5019400	5019560	0	2	50,50	0,110
chrX	5019346	5019560	neuroPSI:0.89466190	950	+	5019346	5019560	0	2	50,50	0,164
chrII	5027189	5027613	neuroPSI:0.31112917	950	+	5027189	5027613	0	2	50,50	0,374
chrII	5027189	5027604	neuroPSI:0.68887083	950	+	5027189	5027604	0	2	50,50	0,365
chrIII	5069678	5069819	neuroPSI:0.89326342	950	+	5069678	5069819	0	2	50,50	0,91
chrIII	5069678	5069823	neuroPSI:0.10673658	950	+	5069678	5069823	0	2	50,50	0,95
chrII	5070616	5070857	neuroPSI:0.71286232	950	-	5070616	5070857	0	2	50,50	0,191
chrII	5070616	5070812	neuroPSI:0.28713768	950	-	5070616	5070812	0	2	50,50	0,146
chrI	5106338	5106489	neuroPSI:0.89453861	950	+	5106338	5106489	0	2	50,50	0,101
chrI	5106342	5106489	neuroPSI:0.10546139	950	+	5106342	5106489	0	2	50,50	0,97
chrI	5137638	5137780	neuroPSI:0.06313314	950	+	5137638	5137780	0	2	50,50	0,92
chrI	5137638	5137789	neuroPSI:0.93686686	950	+	5137638	5137789	0	2	50,50	0,101
chrX	5153033	5153942	neuroPSI:0.59088996	950	-	5153033	5153942	0	2	50,50	0,859
chrX	5153033	5153650	neuroPSI:0.40911004	950	-	5153033	5153650	0	2	50,50	0,567
chrI	5179802	5179955	neuroPSI:0.87241602	950	+	5179802	5179955	0	2	50,50	0,103
chrI	5179802	5179946	neuroPSI:0.12758398	950	+	5179802	5179946	0	2	50,50	0,94
chrI	5184716	5184867	neuroPSI:0.11197548	950	+	5184716	5184867	0	2	50,50	0,101
chrI	5184716	5184876	neuroPSI:0.88802452	950	+	5184716	5184876	0	2	50,50	0,110
chrIV	5189132	5189275	neuroPSI:0.88316804	950	-	5189132	5189275	0	2	50,50	0,93
chrIV	5189126	5189275	neuroPSI:0.11683196	950	-	5189126	5189275	0	2	50,50	0,99
chrI	5234085	5234272	neuroPSI:0.34949713	950	+	5234085	5234272	0	2	50,50	0,137
chrI	5234124	5234272	neuroPSI:0.65050287	950	+	5234124	5234272	0	2	50,50	0,98
chrI	5260329	5260473	neuroPSI:0.06623679	950	+	5260329	5260473	0	2	50,50	0,94
chrI	5260329	5260485	neuroPSI:0.93376321	950	+	5260329	5260485	0	2	50,50	0,106
chrX	5272275	5272447	neuroPSI:0.12462184	950	-	5272275	5272447	0	2	50,50	0,122
chrX	5272289	5272447	neuroPSI:0.87537816	950	-	5272289	5272447	0	2	50,50	0,108
chrIII	5294780	5294934	neuroPSI:0.91374027	950	+	5294780	5294934	0	2	50,50	0,104
chrIII	5294780	5294928	neuroPSI:0.08625973	950	+	5294780	5294928	0	2	50,50	0,98
chrI	5300156	5300300	neuroPSI:0.16749351	950	-	5300156	5300300	0	2	50,50	0,94
chrI	5300149	5300300	neuroPSI:0.83250649	950	-	5300149	5300300	0	2	50,50	0,101
chrIII	5308715	5308868	neuroPSI:0.10527591	950	+	5308715	5308868	0	2	50,50	0,103
chrIII	5308715	5308875	neuroPSI:0.89472409	950	+	5308715	5308875	0	2	50,50	0,110
chrIII	5347070	5347549	neuroPSI:0.69152139	950	-	5347070	5347549	0	2	50,50	0,429
chrIII	5347076	5347549	neuroPSI:0.30847861	950	-	5347076	5347549	0	2	50,50	0,423
chrI	5347226	5347377	neuroPSI:0.72022802	950	+	5347226	5347377	0	2	50,50	0,101
chrI	5347226	5347368	neuroPSI:0.27977198	950	+	5347226	5347368	0	2	50,50	0,92
chrI	5349273	5349421	neuroPSI:0.08180003	950	+	5349273	5349421	0	2	50,50	0,98
chrI	5349278	5349421	neuroPSI:0.91819997	950	+	5349278	5349421	0	2	50,50	0,93
chrIV	5351533	5351848	neuroPSI:0.67946106	950	-	5351533	5351848	0	2	50,50	0,265
chrIV	5351533	5351856	neuroPSI:0.32053894	950	-	5351533	5351856	0	2	50,50	0,273
chrV	5356256	5356400	neuroPSI:0.13651965	950	-	5356256	5356400	0	2	50,50	0,94
chrV	5356256	5356405	neuroPSI:0.86348035	950	-	5356256	5356405	0	2	50,50	0,99
chrI	5364070	5364720	neuroPSI:0.43253146	950	+	5364070	5364720	0	2	50,50	0,600
chrI	5364158	5364720	neuroPSI:0.56746854	950	+	5364158	5364720	0	2	50,50	0,512
chrIV	5372517	5372735	neuroPSI:0.86857911	950	+	5372517	5372735	0	2	50,50	0,168
chrIV	5372517	5372723	neuroPSI:0.13142089	950	+	5372517	5372723	0	2	50,50	0,156
chrI	5417165	5417988	neuroPSI:0.09007168	950	-	5417165	5417988	0	2	50,50	0,773
chrI	5417156	5417988	neuroPSI:0.90992832	950	-	5417156	5417988	0	2	50,50	0,782
chrI	5430655	5430810	neuroPSI:0.13880919	950	+	5430655	5430810	0	2	50,50	0,105
chrI	5430655	5430822	neuroPSI:0.86119081	950	+	5430655	5430822	0	2	50,50	0,117
chrV	5433929	5434074	neuroPSI:0.79597523	950	+	5433929	5434074	0	2	50,50	0,95
chrV	5433929	5434078	neuroPSI:0.20402477	950	+	5433929	5434078	0	2	50,50	0,99
chrI	5436724	5436864	neuroPSI:0.41313825	950	-	5436724	5436864	0	2	50,50	0,90
chrI	5436715	5436864	neuroPSI:0.58686175	950	-	5436715	5436864	0	2	50,50	0,99
chrX	5445187	5445403	neuroPSI:0.59170702	950	+	5445187	5445403	0	2	50,50	0,166
chrX	5445187	5445400	neuroPSI:0.40829298	950	+	5445187	5445400	0	2	50,50	0,163
chrIII	5448062	5448214	neuroPSI:0.41644205	950	-	5448062	5448214	0	2	50,50	0,102
chrIII	5448071	5448214	neuroPSI:0.58355795	950	-	5448071	5448214	0	2	50,50	0,93
chrIV	5448223	5448410	neuroPSI:0.25238432	950	+	5448223	5448410	0	2	50,50	0,137
chrIV	5448223	5448416	neuroPSI:0.74761568	950	+	5448223	5448416	0	2	50,50	0,143
chrIII	5476446	5477603	neuroPSI:0.13349690	950	+	5476446	5477603	0	2	50,50	0,1107
chrIII	5476479	5477603	neuroPSI:0.86650310	950	+	5476479	5477603	0	2	50,50	0,1074
chrI	5482605	5482746	neuroPSI:0.16127583	950	-	5482605	5482746	0	2	50,50	0,91
chrI	5482599	5482746	neuroPSI:0.83872417	950	-	5482599	5482746	0	2	50,50	0,97
chrIV	5540142	5540379	neuroPSI:0.14718832	950	+	5540142	5540379	0	2	50,50	0,187
chrIV	5540163	5540379	neuroPSI:0.85281168	950	+	5540163	5540379	0	2	50,50	0,166
chrX	5586361	5586524	neuroPSI:0.56139785	950	+	5586361	5586524	0	2	50,50	0,113
chrX	5586348	5586524	neuroPSI:0.43860215	950	+	5586348	5586524	0	2	50,50	0,126
chrX	5609736	5609894	neuroPSI:0.39718615	950	-	5609736	5609894	0	2	50,50	0,108
chrX	5609736	5609888	neuroPSI:0.60281385	950	-	5609736	5609888	0	2	50,50	0,102
chrII	5621037	5621180	neuroPSI:0.08481460	950	-	5621037	5621180	0	2	50,50	0,93
chrII	5621028	5621180	neuroPSI:0.91518540	950	-	5621028	5621180	0	2	50,50	0,102
chrII	5624441	5624612	neuroPSI:0.08967509	950	+	5624441	5624612	0	2	50,50	0,121
chrII	5624441	5624618	neuroPSI:0.91032491	950	+	5624441	5624618	0	2	50,50	0,127
chrIII	5625232	5625412	neuroPSI:0.68928571	950	+	5625232	5625412	0	2	50,50	0,130
chrIII	5625232	5625469	neuroPSI:0.31071429	950	+	5625232	5625469	0	2	50,50	0,187
chrII	5630209	5630920	neuroPSI:0.38401048	950	-	5630209	5630920	0	2	50,50	0,661
chrII	5630203	5630920	neuroPSI:0.61598952	950	-	5630203	5630920	0	2	50,50	0,667
chrII	5632903	5633099	neuroPSI:0.84955918	950	+	5632903	5633099	0	2	50,50	0,146
chrII	5632903	5633093	neuroPSI:0.15044082	950	+	5632903	5633093	0	2	50,50	0,140
chrII	5649760	5649911	neuroPSI:0.20937500	950	+	5649760	5649911	0	2	50,50	0,101
chrII	5649756	5649911	neuroPSI:0.79062500	950	+	5649756	5649911	0	2	50,50	0,105
chrX	5681098	5681258	neuroPSI:0.91398527	950	-	5681098	5681258	0	2	50,50	0,110
chrX	5681098	5681321	neuroPSI:0.08601473	950	-	5681098	5681321	0	2	50,50	0,173
chrIII	5693164	5693304	neuroPSI:0.41305077	950	+	5693164	5693304	0	2	50,50	0,90
chrIII	5693164	5693313	neuroPSI:0.58694923	950	+	5693164	5693313	0	2	50,50	0,99
chrIII	5703065	5703206	neuroPSI:0.13017174	950	-	5703065	5703206	0	2	50,50	0,91
chrIII	5703059	5703206	neuroPSI:0.86982826	950	-	5703059	5703206	0	2	50,50	0,97
chrIII	5712491	5712663	neuroPSI:0.89657156	950	+	5712491	5712663	0	2	50,50	0,122
chrIII	5712491	5712657	neuroPSI:0.10342844	950	+	5712491	5712657	0	2	50,50	0,116
chrX	5716094	5716842	neuroPSI:0.68965517	950	+	5716094	5716842	0	2	50,50	0,698
chrX	5716096	5716842	neuroPSI:0.31034483	950	+	5716096	5716842	0	2	50,50	0,696
chrX	5721353	5722352	neuroPSI:0.33456111	950	-	5721353	5722352	0	2	50,50	0,949
chrX	5721353	5722310	neuroPSI:0.66543889	950	-	5721353	5722310	0	2	50,50	0,907
chrX	5726236	5726510	neuroPSI:0.80080771	950	-	5726236	5726510	0	2	50,50	0,224
chrX	5726236	5726381	neuroPSI:0.19919229	950	-	5726236	5726381	0	2	50,50	0,95
chrX	5739651	5740072	neuroPSI:0.83542496	950	-	5739651	5740072	0	2	50,50	0,371
chrX	5739651	5740009	neuroPSI:0.16457504	950	-	5739651	5740009	0	2	50,50	0,308
chrX	5740240	5740432	neuroPSI:0.50203956	950	-	5740240	5740432	0	2	50,50	0,142
chrX	5740240	5740423	neuroPSI:0.49796044	950	-	5740240	5740423	0	2	50,50	0,133
chrII	5772364	5772512	neuroPSI:0.66771562	950	-	5772364	5772512	0	2	50,50	0,98
chrII	5772355	5772512	neuroPSI:0.33228438	950	-	5772355	5772512	0	2	50,50	0,107
chrV	5774232	5774601	neuroPSI:0.30187670	950	-	5774232	5774601	0	2	50,50	0,319
chrV	5774232	5774649	neuroPSI:0.69812330	950	-	5774232	5774649	0	2	50,50	0,367
chrX	5796005	5796156	neuroPSI:0.05168250	950	+	5796005	5796156	0	2	50,50	0,101
chrX	5796011	5796156	neuroPSI:0.94831750	950	+	5796011	5796156	0	2	50,50	0,95
chrIV	5828819	5829762	neuroPSI:0.79801650	950	+	5828819	5829762	0	2	50,50	0,893
chrIV	5828804	5829762	neuroPSI:0.20198350	950	+	5828804	5829762	0	2	50,50	0,908
chrIII	5832734	5832884	neuroPSI:0.51428571	950	-	5832734	5832884	0	2	50,50	0,100
chrIII	5832725	5832884	neuroPSI:0.48571429	950	-	5832725	5832884	0	2	50,50	0,109
chrII	5838006	5838157	neuroPSI:0.87774867	950	-	5838006	5838157	0	2	50,50	0,101
chrII	5838012	5838157	neuroPSI:0.12225133	950	-	5838012	5838157	0	2	50,50	0,95
chrI	5840579	5840773	neuroPSI:0.93085218	950	+	5840579	5840773	0	2	50,50	0,144
chrI	5840579	5840779	neuroPSI:0.06914782	950	+	5840579	5840779	0	2	50,50	0,150
chrII	5907017	5907168	neuroPSI:0.50617351	950	+	5907017	5907168	0	2	50,50	0,101
chrII	5907017	5907159	neuroPSI:0.49382649	950	+	5907017	5907159	0	2	50,50	0,92
chrII	5938635	5938787	neuroPSI:0.59216102	950	+	5938635	5938787	0	2	50,50	0,102
chrII	5938614	5938787	neuroPSI:0.40783898	950	+	5938614	5938787	0	2	50,50	0,123
chrV	5941199	5941644	neuroPSI:0.79690016	950	+	5941199	5941644	0	2	50,50	0,395
chrV	5941199	5941635	neuroPSI:0.20309984	950	+	5941199	5941635	0	2	50,50	0,386
chrI	5945763	5945908	neuroPSI:0.29240491	950	-	5945763	5945908	0	2	50,50	0,95
chrI	5945755	5945908	neuroPSI:0.70759509	950	-	5945755	5945908	0	2	50,50	0,103
chrIII	5946643	5946793	neuroPSI:0.85756452	950	-	5946643	5946793	0	2	50,50	0,100
chrIII	5946649	5946793	neuroPSI:0.14243548	950	-	5946649	5946793	0	2	50,50	0,94
chrIII	5947617	5947805	neuroPSI:0.07612156	950	-	5947617	5947805	0	2	50,50	0,138
chrIII	5947617	5947768	neuroPSI:0.92387844	950	-	5947617	5947768	0	2	50,50	0,101
chrV	5954191	5954414	neuroPSI:0.91810829	950	-	5954191	5954414	0	2	50,50	0,173
chrV	5954185	5954414	neuroPSI:0.08189171	950	-	5954185	5954414	0	2	50,50	0,179
chrIII	5960426	5960580	neuroPSI:0.66902834	950	+	5960426	5960580	0	2	50,50	0,104
chrIII	5960426	5960574	neuroPSI:0.33097166	950	+	5960426	5960574	0	2	50,50	0,98
chrI	5982427	5982583	neuroPSI:0.89025549	950	-	5982427	5982583	0	2	50,50	0,106
chrI	5982427	5982578	neuroPSI:0.10974451	950	-	5982427	5982578	0	2	50,50	0,101
chrI	5988711	5988871	neuroPSI:0.31182493	950	+	5988711	5988871	0	2	50,50	0,110
chrI	5988711	5988880	neuroPSI:0.68817507	950	+	5988711	5988880	0	2	50,50	0,119
chrI	5998605	5998759	neuroPSI:0.55200216	950	-	5998605	5998759	0	2	50,50	0,104
chrI	5998614	5998759	neuroPSI:0.44799784	950	-	5998614	5998759	0	2	50,50	0,95
chrII	6023752	6024043	neuroPSI:0.54105048	950	-	6023752	6024043	0	2	50,50	0,241
chrII	6023752	6024058	neuroPSI:0.45894952	950	-	6023752	6024058	0	2	50,50	0,256
chrX	6032861	6033015	neuroPSI:0.91483433	950	+	6032861	6033015	0	2	50,50	0,104
chrX	6032861	6033018	neuroPSI:0.08516567	950	+	6032861	6033018	0	2	50,50	0,107
chrX	6047330	6047478	neuroPSI:0.42154024	950	-	6047330	6047478	0	2	50,50	0,98
chrX	6047321	6047478	neuroPSI:0.57845976	950	-	6047321	6047478	0	2	50,50	0,107
chrV	6052759	6053161	neuroPSI:0.90208668	950	-	6052759	6053161	0	2	50,50	0,352
chrV	6052759	6053245	neuroPSI:0.09791332	950	-	6052759	6053245	0	2	50,50	0,436
chrIII	6057989	6058139	neuroPSI:0.25997799	950	+	6057989	6058139	0	2	50,50	0,100
chrIII	6057381	6058139	neuroPSI:0.74002201	950	+	6057381	6058139	0	2	50,50	0,708
chrI	6071430	6071774	neuroPSI:0.51863866	950	-	6071430	6071774	0	2	50,50	0,294
chrI	6071430	6071828	neuroPSI:0.48136134	950	-	6071430	6071828	0	2	50,50	0,348
chrX	6080469	6080940	neuroPSI:0.21099366	950	+	6080469	6080940	0	2	50,50	0,421
chrX	6080508	6080940	neuroPSI:0.78900634	950	+	6080508	6080940	0	2	50,50	0,382
chrI	6108778	6108936	neuroPSI:0.42571839	950	-	6108778	6108936	0	2	50,50	0,108
chrI	6108778	6108923	neuroPSI:0.57428161	950	-	6108778	6108923	0	2	50,50	0,95
chrI	6112451	6112600	neuroPSI:0.81731885	950	+	6112451	6112600	0	2	50,50	0,99
chrI	6112451	6112594	neuroPSI:0.18268115	950	+	6112451	6112594	0	2	50,50	0,93
chrI	6125543	6125700	neuroPSI:0.78891282	950	+	6125543	6125700	0	2	50,50	0,107
chrI	6125543	6125694	neuroPSI:0.21108718	950	+	6125543	6125694	0	2	50,50	0,101
chrII	6159968	6160116	neuroPSI:0.34590517	950	-	6159968	6160116	0	2	50,50	0,98
chrII	6159968	6160161	neuroPSI:0.65409483	950	-	6159968	6160161	0	2	50,50	0,143
chrX	6172444	6172687	neuroPSI:0.37747909	950	+	6172444	6172687	0	2	50,50	0,193
chrX	6172513	6172687	neuroPSI:0.62252091	950	+	6172513	6172687	0	2	50,50	0,124
chrX	6173373	6173561	neuroPSI:0.86687948	950	+	6173373	6173561	0	2	50,50	0,138
chrX	6173378	6173561	neuroPSI:0.13312052	950	+	6173378	6173561	0	2	50,50	0,133
chrIII	6196302	6196512	neuroPSI:0.72619419	950	-	6196302	6196512	0	2	50,50	0,160
chrIII	6196302	6196485	neuroPSI:0.27380581	950	-	6196302	6196485	0	2	50,50	0,133
chrII	6197436	6197585	neuroPSI:0.44086659	950	+	6197436	6197585	0	2	50,50	0,99
chrII	6197442	6197585	neuroPSI:0.55913341	950	+	6197442	6197585	0	2	50,50	0,93
chrIII	6221030	6223772	neuroPSI:0.90254619	950	+	6221030	6223772	0	2	50,50	0,2692
chrIII	6221021	6223772	neuroPSI:0.09745381	950	+	6221021	6223772	0	2	50,50	0,2701
chrIII	6226205	6226891	neuroPSI:0.54831017	950	-	6226205	6226891	0	2	50,50	0,636
chrIII	6226517	6226891	neuroPSI:0.45168983	950	-	6226517	6226891	0	2	50,50	0,324
chrIII	6247252	6247406	neuroPSI:0.79414636	950	-	6247252	6247406	0	2	50,50	0,104
chrIII	6247261	6247406	neuroPSI:0.20585364	950	-	6247261	6247406	0	2	50,50	0,95
chrIV	6255425	6256324	neuroPSI:0.59353865	950	-	6255425	6256324	0	2	50,50	0,849
chrIV	6255425	6256320	neuroPSI:0.40646135	950	-	6255425	6256320	0	2	50,50	0,845
chrIV	6278649	6278941	neuroPSI:0.90413780	950	-	6278649	6278941	0	2	50,50	0,242
chrIV	6278728	6278874	neuroPSI:0.09586220	950	-	6278728	6278874	0	2	50,50	0,96
chrI	6319292	6319491	neuroPSI:0.14930791	950	+	6319292	6319491	0	2	50,50	0,149
chrI	6319292	6319500	neuroPSI:0.85069209	950	+	6319292	6319500	0	2	50,50	0,158
chrIV	6325183	6325360	neuroPSI:0.24885244	950	+	6325183	6325360	0	2	50,50	0,127
chrIV	6325183	6325369	neuroPSI:0.75114756	950	+	6325183	6325369	0	2	50,50	0,136
chrIII	6357532	6357704	neuroPSI:0.68157790	950	+	6357532	6357704	0	2	50,50	0,122
chrIII	6357514	6357704	neuroPSI:0.31842210	950	+	6357514	6357704	0	2	50,50	0,140
chrI	6358698	6358841	neuroPSI:0.32113837	950	+	6358698	6358841	0	2	50,50	0,93
chrI	6358698	6358847	neuroPSI:0.67886163	950	+	6358698	6358847	0	2	50,50	0,99
chrIII	6416439	6416717	neuroPSI:0.16596051	950	-	6416439	6416717	0	2	50,50	0,228
chrIII	6416439	6416721	neuroPSI:0.83403949	950	-	6416439	6416721	0	2	50,50	0,232
chrV	6427621	6428095	neuroPSI:0.74482950	950	-	6427621	6428095	0	2	50,50	0,424
chrV	6427283	6428095	neuroPSI:0.25517050	950	-	6427283	6428095	0	2	50,50	0,762
chrI	6442375	6442676	neuroPSI:0.88254855	950	-	6442375	6442676	0	2	50,50	0,251
chrI	6442375	6442708	neuroPSI:0.11745145	950	-	6442375	6442708	0	2	50,50	0,283
chrIII	6443728	6443872	neuroPSI:0.93449198	950	-	6443728	6443872	0	2	50,50	0,94
chrIII	6443728	6443879	neuroPSI:0.06550802	950	-	6443728	6443879	0	2	50,50	0,101
chrIII	6449684	6449861	neuroPSI:0.21755289	950	-	6449684	6449861	0	2	50,50	0,127
chrIII	6449678	6449861	neuroPSI:0.78244711	950	-	6449678	6449861	0	2	50,50	0,133
chrI	6462879	6463121	neuroPSI:0.24662026	950	+	6462879	6463121	0	2	50,50	0,192
chrI	6462879	6463118	neuroPSI:0.75337974	950	+	6462879	6463118	0	2	50,50	0,189
chrIII	6470871	6471026	neuroPSI:0.83159722	950	+	6470871	6471026	0	2	50,50	0,105
chrIII	6470871	6471020	neuroPSI:0.16840278	950	+	6470871	6471020	0	2	50,50	0,99
chrI	6484842	6485363	neuroPSI:0.62360991	950	+	6484842	6485363	0	2	50,50	0,471
chrI	6484842	6485351	neuroPSI:0.37639009	950	+	6484842	6485351	0	2	50,50	0,459
chrX	6497285	6497987	neuroPSI:0.08717105	950	-	6497285	6497987	0	2	50,50	0,652
chrX	6497204	6497987	neuroPSI:0.91282895	950	-	6497204	6497987	0	2	50,50	0,733
chrIV	6566298	6567111	neuroPSI:0.74758646	950	-	6566298	6567111	0	2	50,50	0,763
chrIV	6566298	6567150	neuroPSI:0.25241354	950	-	6566298	6567150	0	2	50,50	0,802
chrX	6566422	6567711	neuroPSI:0.61250000	950	-	6566422	6567711	0	2	50,50	0,1239
chrX	6566428	6567711	neuroPSI:0.38750000	950	-	6566428	6567711	0	2	50,50	0,1233
chrI	6567626	6567875	neuroPSI:0.18333333	950	+	6567626	6567875	0	2	50,50	0,199
chrI	6567626	6567881	neuroPSI:0.81666667	950	+	6567626	6567881	0	2	50,50	0,205
chrI	6584105	6584318	neuroPSI:0.33070475	950	+	6584105	6584318	0	2	50,50	0,163
chrI	6584105	6584324	neuroPSI:0.66929525	950	+	6584105	6584324	0	2	50,50	0,169
chrIV	6585080	6585257	neuroPSI:0.71245421	950	-	6585080	6585257	0	2	50,50	0,127
chrIV	6585086	6585257	neuroPSI:0.28754579	950	-	6585086	6585257	0	2	50,50	0,121
chrI	6598599	6598777	neuroPSI:0.89659268	950	+	6598599	6598777	0	2	50,50	0,128
chrI	6598599	6598771	neuroPSI:0.10340732	950	+	6598599	6598771	0	2	50,50	0,122
chrV	6606855	6607554	neuroPSI:0.22698675	950	-	6606855	6607554	0	2	50,50	0,649
chrV	6606855	6607520	neuroPSI:0.72292181	950	-	6606855	6607520	0	2	50,50	0,615
chrX	6637247	6637390	neuroPSI:0.50676047	950	-	6637247	6637390	0	2	50,50	0,93
chrX	6637238	6637390	neuroPSI:0.49323953	950	-	6637238	6637390	0	2	50,50	0,102
chrIII	6698042	6698631	neuroPSI:0.83546309	950	+	6698042	6698631	0	2	50,50	0,539
chrIII	6698039	6698631	neuroPSI:0.16453691	950	+	6698039	6698631	0	2	50,50	0,542
chrIII	6699902	6700077	neuroPSI:0.24732710	950	+	6699902	6700077	0	2	50,50	0,125
chrIII	6699887	6700077	neuroPSI:0.75267290	950	+	6699887	6700077	0	2	50,50	0,140
chrV	6706390	6706550	neuroPSI:0.89481838	950	-	6706390	6706550	0	2	50,50	0,110
chrV	6706390	6706531	neuroPSI:0.10518162	950	-	6706390	6706531	0	2	50,50	0,91
chrIII	6726396	6726535	neuroPSI:0.18805473	950	+	6726396	6726535	0	2	50,50	0,89
chrIII	6726396	6726544	neuroPSI:0.81194527	950	+	6726396	6726544	0	2	50,50	0,98
chrV	6728997	6729151	neuroPSI:0.38923933	950	+	6728997	6729151	0	2	50,50	0,104
chrV	6728997	6729145	neuroPSI:0.61076067	950	+	6728997	6729145	0	2	50,50	0,98
chrIII	6733080	6733234	neuroPSI:0.90386373	950	+	6733080	6733234	0	2	50,50	0,104
chrIII	6733080	6733228	neuroPSI:0.09613627	950	+	6733080	6733228	0	2	50,50	0,98
chrV	6763006	6763339	neuroPSI:0.89656659	950	-	6763006	6763339	0	2	50,50	0,283
chrV	6763006	6763303	neuroPSI:0.10343341	950	-	6763006	6763303	0	2	50,50	0,247
chrII	6780892	6781126	neuroPSI:0.34064839	950	+	6780892	6781126	0	2	50,50	0,184
chrII	6780892	6781135	neuroPSI:0.65935161	950	+	6780892	6781135	0	2	50,50	0,193
chrV	6785545	6785810	neuroPSI:0.85049505	950	+	6785545	6785810	0	2	50,50	0,215
chrV	6785545	6785817	neuroPSI:0.14950495	950	+	6785545	6785817	0	2	50,50	0,222
chrI	6795856	6796057	neuroPSI:0.31928916	950	+	6795856	6796057	0	2	50,50	0,151
chrI	6795856	6796072	neuroPSI:0.68071084	950	+	6795856	6796072	0	2	50,50	0,166
chrI	6796716	6796916	neuroPSI:0.60065455	950	+	6796716	6796916	0	2	50,50	0,150
chrI	6796716	6796922	neuroPSI:0.39934545	950	+	6796716	6796922	0	2	50,50	0,156
chrII	6804368	6804522	neuroPSI:0.29668803	950	+	6804368	6804522	0	2	50,50	0,104
chrII	6804377	6804522	neuroPSI:0.70331197	950	+	6804377	6804522	0	2	50,50	0,95
chrI	6813230	6813435	neuroPSI:0.16857888	950	+	6813230	6813435	0	2	50,50	0,155
chrI	6813230	6813444	neuroPSI:0.83142112	950	+	6813230	6813444	0	2	50,50	0,164
chrII	6846437	6846580	neuroPSI:0.18213644	950	+	6846437	6846580	0	2	50,50	0,93
chrII	6846437	6846586	neuroPSI:0.81786356	950	+	6846437	6846586	0	2	50,50	0,99
chrII	6854093	6854243	neuroPSI:0.83626536	950	-	6854093	6854243	0	2	50,50	0,100
chrII	6854099	6854243	neuroPSI:0.16373464	950	-	6854099	6854243	0	2	50,50	0,94
chrII	6857599	6857751	neuroPSI:0.46041667	950	-	6857599	6857751	0	2	50,50	0,102
chrII	6857602	6857751	neuroPSI:0.53958333	950	-	6857602	6857751	0	2	50,50	0,99
chrIII	6866642	6866800	neuroPSI:0.38069779	950	-	6866642	6866800	0	2	50,50	0,108
chrIII	6866642	6866815	neuroPSI:0.61930221	950	-	6866642	6866815	0	2	50,50	0,123
chrIII	6904272	6904427	neuroPSI:0.83429644	950	+	6904272	6904427	0	2	50,50	0,105
chrIII	6904272	6904418	neuroPSI:0.16570356	950	+	6904272	6904418	0	2	50,50	0,96
chrX	6925936	6926099	neuroPSI:0.57272727	950	-	6925936	6926099	0	2	50,50	0,113
chrX	6925945	6926099	neuroPSI:0.42727273	950	-	6925945	6926099	0	2	50,50	0,104
chrX	6944823	6945921	neuroPSI:0.76602260	950	-	6944823	6945921	0	2	50,50	0,1048
chrX	6944950	6945921	neuroPSI:0.23397740	950	-	6944950	6945921	0	2	50,50	0,921
chrII	6952414	6952562	neuroPSI:0.42232181	950	+	6952414	6952562	0	2	50,50	0,98
chrII	6952414	6952571	neuroPSI:0.57767819	950	+	6952414	6952571	0	2	50,50	0,107
chrII	6953009	6953258	neuroPSI:0.13455835	950	+	6953009	6953258	0	2	50,50	0,199
chrII	6953009	6953231	neuroPSI:0.86544165	950	+	6953009	6953231	0	2	50,50	0,172
chrI	6990690	6990836	neuroPSI:0.35255019	950	+	6990690	6990836	0	2	50,50	0,96
chrI	6990690	6990845	neuroPSI:0.64744981	950	+	6990690	6990845	0	2	50,50	0,105
chrII	7008344	7008674	neuroPSI:0.59281381	950	+	7008344	7008674	0	2	50,50	0,280
chrII	7008353	7008674	neuroPSI:0.40718619	950	+	7008353	7008674	0	2	50,50	0,271
chrIII	7022280	7022449	neuroPSI:0.90420411	950	+	7022280	7022449	0	2	50,50	0,119
chrIII	7022272	7022449	neuroPSI:0.09579589	950	+	7022272	7022449	0	2	50,50	0,127
chrII	7027133	7027276	neuroPSI:0.25425411	950	+	7027133	7027276	0	2	50,50	0,93
chrII	7027133	7027282	neuroPSI:0.74574589	950	+	7027133	7027282	0	2	50,50	0,99
chrX	7029199	7029382	neuroPSI:0.85813290	950	+	7029199	7029382	0	2	50,50	0,133
chrX	7029199	7029373	neuroPSI:0.14186710	950	+	7029199	7029373	0	2	50,50	0,124
chrI	7047837	7047994	neuroPSI:0.40469371	950	+	7047837	7047994	0	2	50,50	0,107
chrI	7047837	7047985	neuroPSI:0.59530629	950	+	7047837	7047985	0	2	50,50	0,98
chrIV	7051599	7051777	neuroPSI:0.61557025	950	+	7051599	7051777	0	2	50,50	0,128
chrIV	7051599	7051825	neuroPSI:0.38442975	950	+	7051599	7051825	0	2	50,50	0,176
chrII	7055834	7055975	neuroPSI:0.17137080	950	+	7055834	7055975	0	2	50,50	0,91
chrII	7055834	7055982	neuroPSI:0.82862920	950	+	7055834	7055982	0	2	50,50	0,98
chrV	7062008	7062238	neuroPSI:0.72173508	950	+	7062008	7062238	0	2	50,50	0,180
chrV	7062026	7062238	neuroPSI:0.27826492	950	+	7062026	7062238	0	2	50,50	0,162
chrIII	7084387	7084588	neuroPSI:0.92343035	950	-	7084387	7084588	0	2	50,50	0,151
chrIII	7084387	7084590	neuroPSI:0.07656965	950	-	7084387	7084590	0	2	50,50	0,153
chrIII	7092524	7092711	neuroPSI:0.92175342	950	+	7092524	7092711	0	2	50,50	0,137
chrIII	7092417	7092711	neuroPSI:0.07824658	950	+	7092417	7092711	0	2	50,50	0,244
chrI	7098645	7098789	neuroPSI:0.89009726	950	+	7098645	7098789	0	2	50,50	0,94
chrI	7098645	7098793	neuroPSI:0.10990274	950	+	7098645	7098793	0	2	50,50	0,98
chrII	7101017	7101164	neuroPSI:0.26225419	950	-	7101017	7101164	0	2	50,50	0,97
chrII	7101017	7101160	neuroPSI:0.73774581	950	-	7101017	7101160	0	2	50,50	0,93
chrIV	7102920	7103076	neuroPSI:0.07703209	950	-	7102920	7103076	0	2	50,50	0,106
chrIV	7102920	7103072	neuroPSI:0.92296791	950	-	7102920	7103072	0	2	50,50	0,102
chrIV	7104376	7104557	neuroPSI:0.17128099	950	+	7104376	7104557	0	2	50,50	0,131
chrIV	7104394	7104557	neuroPSI:0.82871901	950	+	7104394	7104557	0	2	50,50	0,113
chrII	7123734	7123962	neuroPSI:0.09842721	950	+	7123734	7123962	0	2	50,50	0,178
chrII	7123734	7123959	neuroPSI:0.90157279	950	+	7123734	7123959	0	2	50,50	0,175
chrIII	7136068	7136323	neuroPSI:0.15815014	950	+	7136068	7136323	0	2	50,50	0,205
chrIII	7134958	7136323	neuroPSI:0.84184986	950	+	7134958	7136323	0	2	50,50	0,1315
chrI	7141955	7142109	neuroPSI:0.75998594	950	-	7141955	7142109	0	2	50,50	0,104
chrI	7141964	7142109	neuroPSI:0.24001406	950	-	7141964	7142109	0	2	50,50	0,95
chrIV	7150739	7150929	neuroPSI:0.28810484	950	-	7150739	7150929	0	2	50,50	0,140
chrIV	7150751	7150929	neuroPSI:0.71189516	950	-	7150751	7150929	0	2	50,50	0,128
chrII	7152960	7153188	neuroPSI:0.06984502	950	+	7152960	7153188	0	2	50,50	0,178
chrII	7152960	7153185	neuroPSI:0.93015498	950	+	7152960	7153185	0	2	50,50	0,175
chrIII	7183567	7183710	neuroPSI:0.16661338	950	+	7183567	7183710	0	2	50,50	0,93
chrIII	7183567	7183716	neuroPSI:0.83338662	950	+	7183567	7183716	0	2	50,50	0,99
chrII	7201007	7201176	neuroPSI:0.68205128	950	+	7201007	7201176	0	2	50,50	0,119
chrII	7201007	7201169	neuroPSI:0.31794872	950	+	7201007	7201169	0	2	50,50	0,112
chrX	7225582	7225816	neuroPSI:0.89946463	950	+	7225582	7225816	0	2	50,50	0,184
chrX	7225538	7225816	neuroPSI:0.10053537	950	+	7225538	7225816	0	2	50,50	0,228
chrI	7258368	7258518	neuroPSI:0.46193072	950	+	7258368	7258518	0	2	50,50	0,100
chrI	7258368	7258526	neuroPSI:0.53806928	950	+	7258368	7258526	0	2	50,50	0,108
chrX	7273137	7273286	neuroPSI:0.54920138	950	-	7273137	7273286	0	2	50,50	0,99
chrX	7273126	7273271	neuroPSI:0.45079862	950	-	7273126	7273271	0	2	50,50	0,95
chrI	7281917	7282159	neuroPSI:0.47814311	950	-	7281917	7282159	0	2	50,50	0,192
chrI	7281917	7282135	neuroPSI:0.52185689	950	-	7281917	7282135	0	2	50,50	0,168
chrII	7292341	7292491	neuroPSI:0.50083990	950	-	7292341	7292491	0	2	50,50	0,100
chrII	7292350	7292491	neuroPSI:0.49916010	950	-	7292350	7292491	0	2	50,50	0,91
chrX	7295194	7295381	neuroPSI:0.08710625	950	+	7295194	7295381	0	2	50,50	0,137
chrX	7295194	7295375	neuroPSI:0.91289375	950	+	7295194	7295375	0	2	50,50	0,131
chrI	7304146	7304297	neuroPSI:0.46831413	950	-	7304146	7304297	0	2	50,50	0,101
chrI	7304146	7304293	neuroPSI:0.53168587	950	-	7304146	7304293	0	2	50,50	0,97
chrII	7306953	7307092	neuroPSI:0.29435107	950	+	7306953	7307092	0	2	50,50	0,89
chrII	7306953	7307107	neuroPSI:0.70564893	950	+	7306953	7307107	0	2	50,50	0,104
chrIII	7310188	7310407	neuroPSI:0.62668799	950	-	7310188	7310407	0	2	50,50	0,169
chrIII	7310227	7310407	neuroPSI:0.37331201	950	-	7310227	7310407	0	2	50,50	0,130
chrIII	7340546	7340699	neuroPSI:0.14038567	950	+	7340546	7340699	0	2	50,50	0,103
chrIII	7340537	7340699	neuroPSI:0.85961433	950	+	7340537	7340699	0	2	50,50	0,112
chrII	7348223	7348373	neuroPSI:0.62644444	950	+	7348223	7348373	0	2	50,50	0,100
chrII	7348223	7348367	neuroPSI:0.37355556	950	+	7348223	7348367	0	2	50,50	0,94
chrI	7350550	7350700	neuroPSI:0.57809354	950	-	7350550	7350700	0	2	50,50	0,100
chrI	7350556	7350700	neuroPSI:0.42190646	950	-	7350556	7350700	0	2	50,50	0,94
chrIII	7356609	7356764	neuroPSI:0.10817688	950	-	7356609	7356764	0	2	50,50	0,105
chrIII	7356609	7356755	neuroPSI:0.89182312	950	-	7356609	7356755	0	2	50,50	0,96
chrII	7396230	7396387	neuroPSI:0.07298478	950	+	7396230	7396387	0	2	50,50	0,107
chrII	7396230	7396394	neuroPSI:0.92701522	950	+	7396230	7396394	0	2	50,50	0,114
chrV	7434552	7434889	neuroPSI:0.18817045	950	-	7434552	7434889	0	2	50,50	0,287
chrV	7434552	7434894	neuroPSI:0.81182955	950	-	7434552	7434894	0	2	50,50	0,292
chrV	7439166	7439447	neuroPSI:0.71480129	950	+	7439166	7439447	0	2	50,50	0,231
chrV	7439233	7439447	neuroPSI:0.28519871	950	+	7439233	7439447	0	2	50,50	0,164
chrII	7457114	7457259	neuroPSI:0.87302768	950	-	7457114	7457259	0	2	50,50	0,95
chrII	7457114	7457293	neuroPSI:0.12697232	950	-	7457114	7457293	0	2	50,50	0,129
chrIII	7481284	7481537	neuroPSI:0.15100993	950	-	7481284	7481537	0	2	50,50	0,203
chrIII	7481269	7481537	neuroPSI:0.84899007	950	-	7481269	7481537	0	2	50,50	0,218
chrX	7529818	7529965	neuroPSI:0.50189467	950	-	7529818	7529965	0	2	50,50	0,97
chrX	7529806	7529965	neuroPSI:0.49810533	950	-	7529806	7529965	0	2	50,50	0,109
chrX	7538391	7538530	neuroPSI:0.06233801	950	-	7538391	7538530	0	2	50,50	0,89
chrX	7538385	7538530	neuroPSI:0.93766199	950	-	7538385	7538530	0	2	50,50	0,95
chrI	7539209	7539352	neuroPSI:0.17894756	950	-	7539209	7539352	0	2	50,50	0,93
chrI	7539200	7539352	neuroPSI:0.82105244	950	-	7539200	7539352	0	2	50,50	0,102
chrII	7541928	7542208	neuroPSI:0.90776496	950	+	7541928	7542208	0	2	50,50	0,230
chrII	7541928	7542199	neuroPSI:0.09223504	950	+	7541928	7542199	0	2	50,50	0,221
chrIV	7550977	7551418	neuroPSI:0.44812642	950	+	7550977	7551418	0	2	50,50	0,391
chrIV	7550977	7551424	neuroPSI:0.55187358	950	+	7550977	7551424	0	2	50,50	0,397
chrIV	7556017	7556167	neuroPSI:0.22187262	950	-	7556017	7556167	0	2	50,50	0,100
chrIV	7556017	7556163	neuroPSI:0.77812738	950	-	7556017	7556163	0	2	50,50	0,96
chrII	7586112	7586753	neuroPSI:0.69899712	950	-	7586112	7586753	0	2	50,50	0,591
chrII	7586112	7586757	neuroPSI:0.30100288	950	-	7586112	7586757	0	2	50,50	0,595
chrII	7597963	7598130	neuroPSI:0.14279893	950	-	7597963	7598130	0	2	50,50	0,117
chrII	7597966	7598130	neuroPSI:0.85720107	950	-	7597966	7598130	0	2	50,50	0,114
chrI	7600283	7600460	neuroPSI:0.83401498	950	+	7600283	7600460	0	2	50,50	0,127
chrI	7600283	7600484	neuroPSI:0.16598502	950	+	7600283	7600484	0	2	50,50	0,151
chrII	7669753	7669895	neuroPSI:0.36870262	950	+	7669753	7669895	0	2	50,50	0,92
chrII	7669327	7669895	neuroPSI:0.63129738	950	+	7669327	7669895	0	2	50,50	0,518
chrI	7696603	7696751	neuroPSI:0.72894953	950	+	7696603	7696751	0	2	50,50	0,98
chrI	7696603	7696742	neuroPSI:0.27105047	950	+	7696603	7696742	0	2	50,50	0,89
chrII	7708255	7708428	neuroPSI:0.06043384	950	-	7708255	7708428	0	2	50,50	0,123
chrII	7708255	7708424	neuroPSI:0.93956616	950	-	7708255	7708424	0	2	50,50	0,119
chrIII	7794308	7794678	neuroPSI:0.10020681	950	-	7794308	7794678	0	2	50,50	0,320
chrIII	7794293	7794678	neuroPSI:0.89979319	950	-	7794293	7794678	0	2	50,50	0,335
chrIV	7795067	7795254	neuroPSI:0.31413169	950	-	7795067	7795254	0	2	50,50	0,137
chrIV	7795061	7795254	neuroPSI:0.68586831	950	-	7795061	7795254	0	2	50,50	0,143
chrII	7816732	7816874	neuroPSI:0.25090151	950	+	7816732	7816874	0	2	50,50	0,92
chrII	7816732	7816877	neuroPSI:0.74909849	950	+	7816732	7816877	0	2	50,50	0,95
chrIV	7822125	7822539	neuroPSI:0.15883743	950	-	7822125	7822539	0	2	50,50	0,364
chrIV	7822125	7822554	neuroPSI:0.84116257	950	-	7822125	7822554	0	2	50,50	0,379
chrIII	7842780	7842964	neuroPSI:0.94759093	950	-	7842780	7842964	0	2	50,50	0,134
chrIII	7842731	7842964	neuroPSI:0.05240907	950	-	7842731	7842964	0	2	50,50	0,183
chrI	7847343	7847494	neuroPSI:0.78700225	950	-	7847343	7847494	0	2	50,50	0,101
chrI	7847343	7847498	neuroPSI:0.21299775	950	-	7847343	7847498	0	2	50,50	0,105
chrIV	7852967	7853129	neuroPSI:0.43173701	950	+	7852967	7853129	0	2	50,50	0,112
chrIV	7852967	7853120	neuroPSI:0.56826299	950	+	7852967	7853120	0	2	50,50	0,103
chrI	7854935	7855455	neuroPSI:0.63745704	950	+	7854935	7855455	0	2	50,50	0,470
chrI	7854905	7855455	neuroPSI:0.36254296	950	+	7854905	7855455	0	2	50,50	0,500
chrIII	7857056	7857200	neuroPSI:0.88160985	950	-	7857056	7857200	0	2	50,50	0,94
chrIII	7857050	7857200	neuroPSI:0.11839015	950	-	7857050	7857200	0	2	50,50	0,100
chrI	7858243	7858602	neuroPSI:0.18162285	950	-	7858243	7858602	0	2	50,50	0,309
chrI	7858236	7858602	neuroPSI:0.81837715	950	-	7858236	7858602	0	2	50,50	0,316
chrV	7875886	7876489	neuroPSI:0.22989091	950	+	7875886	7876489	0	2	50,50	0,553
chrV	7875868	7876489	neuroPSI:0.77010909	950	+	7875868	7876489	0	2	50,50	0,571
chrX	7880165	7880322	neuroPSI:0.52575251	950	-	7880165	7880322	0	2	50,50	0,107
chrX	7880171	7880322	neuroPSI:0.47424749	950	-	7880171	7880322	0	2	50,50	0,101
chrIII	7885552	7885847	neuroPSI:0.78626649	950	-	7885552	7885847	0	2	50,50	0,245
chrIII	7885596	7885847	neuroPSI:0.21373351	950	-	7885596	7885847	0	2	50,50	0,201
chrIII	7886219	7886473	neuroPSI:0.22202844	950	-	7886219	7886473	0	2	50,50	0,204
chrIII	7886213	7886473	neuroPSI:0.77797156	950	-	7886213	7886473	0	2	50,50	0,210
chrIV	7912777	7912924	neuroPSI:0.85254211	950	+	7912777	7912924	0	2	50,50	0,97
chrIV	7912777	7912918	neuroPSI:0.14745789	950	+	7912777	7912918	0	2	50,50	0,91
chrIII	7928038	7928214	neuroPSI:0.39249466	950	-	7928038	7928214	0	2	50,50	0,126
chrIII	7928034	7928214	neuroPSI:0.60750534	950	-	7928034	7928214	0	2	50,50	0,130
chrIII	7931301	7931445	neuroPSI:0.43261470	950	+	7931301	7931445	0	2	50,50	0,94
chrIII	7931301	7931451	neuroPSI:0.56738530	950	+	7931301	7931451	0	2	50,50	0,100
chrIII	7937081	7937230	neuroPSI:0.10900635	950	+	7937081	7937230	0	2	50,50	0,99
chrIII	7937081	7937239	neuroPSI:0.89099365	950	+	7937081	7937239	0	2	50,50	0,108
chrII	7945752	7946027	neuroPSI:0.86147020	950	-	7945752	7946027	0	2	50,50	0,225
chrII	7945744	7946027	neuroPSI:0.13852980	950	-	7945744	7946027	0	2	50,50	0,233
chrX	7954520	7954802	neuroPSI:0.55373414	950	+	7954520	7954802	0	2	50,50	0,232
chrX	7954520	7954811	neuroPSI:0.44626586	950	+	7954520	7954811	0	2	50,50	0,241
chrV	7961618	7961780	neuroPSI:0.63064667	950	-	7961618	7961780	0	2	50,50	0,112
chrV	7961630	7961780	neuroPSI:0.36935333	950	-	7961630	7961780	0	2	50,50	0,100
chrV	7975014	7975461	neuroPSI:0.13657617	950	-	7975014	7975461	0	2	50,50	0,397
chrV	7975014	7975482	neuroPSI:0.86342383	950	-	7975014	7975482	0	2	50,50	0,418
chrIII	7977262	7977416	neuroPSI:0.87348485	950	-	7977262	7977416	0	2	50,50	0,104
chrIII	7977274	7977416	neuroPSI:0.12651515	950	-	7977274	7977416	0	2	50,50	0,92
chrI	7991090	7991237	neuroPSI:0.72126437	950	+	7991090	7991237	0	2	50,50	0,97
chrI	7991090	7991231	neuroPSI:0.27873563	950	+	7991090	7991231	0	2	50,50	0,91
chrI	7992384	7992573	neuroPSI:0.81977671	950	+	7992384	7992573	0	2	50,50	0,139
chrI	7992384	7992580	neuroPSI:0.18022329	950	+	7992384	7992580	0	2	50,50	0,146
chrI	7996388	7996538	neuroPSI:0.91004429	950	+	7996388	7996538	0	2	50,50	0,100
chrI	7996388	7996532	neuroPSI:0.08995571	950	+	7996388	7996532	0	2	50,50	0,94
chrV	8012695	8012899	neuroPSI:0.09897215	950	-	8012695	8012899	0	2	50,50	0,154
chrV	8012689	8012899	neuroPSI:0.90102785	950	-	8012689	8012899	0	2	50,50	0,160
chrIII	8012971	8013169	neuroPSI:0.07748656	950	+	8012971	8013169	0	2	50,50	0,148
chrIII	8012971	8013175	neuroPSI:0.92251344	950	+	8012971	8013175	0	2	50,50	0,154
chrI	8017205	8017833	neuroPSI:0.58702481	950	+	8017205	8017833	0	2	50,50	0,578
chrI	8017181	8017833	neuroPSI:0.41297519	950	+	8017181	8017833	0	2	50,50	0,602
chrX	8021331	8022823	neuroPSI:0.38257576	950	+	8021331	8022823	0	2	50,50	0,1442
chrX	8021331	8022817	neuroPSI:0.61742424	950	+	8021331	8022817	0	2	50,50	0,1436
chrIII	8026524	8026776	neuroPSI:0.10663097	950	-	8026524	8026776	0	2	50,50	0,202
chrIII	8026527	8026776	neuroPSI:0.89336903	950	-	8026527	8026776	0	2	50,50	0,199
chrIII	8027472	8027906	neuroPSI:0.28772032	950	-	8027472	8027906	0	2	50,50	0,384
chrIII	8027463	8027906	neuroPSI:0.71227968	950	-	8027463	8027906	0	2	50,50	0,393
chrIII	8082035	8082185	neuroPSI:0.52707483	950	+	8082035	8082185	0	2	50,50	0,100
chrIII	8082035	8082176	neuroPSI:0.47292517	950	+	8082035	8082176	0	2	50,50	0,91
chrIV	8085228	8085802	neuroPSI:0.84090761	950	-	8085228	8085802	0	2	50,50	0,524
chrIV	8085183	8085802	neuroPSI:0.15909239	950	-	8085183	8085802	0	2	50,50	0,569
chrI	8108208	8108782	neuroPSI:0.92738488	950	+	8108208	8108782	0	2	50,50	0,524
chrI	8108208	8108776	neuroPSI:0.07261512	950	+	8108208	8108776	0	2	50,50	0,518
chrIV	8140536	8141030	neuroPSI:0.11344905	950	+	8140536	8141030	0	2	50,50	0,444
chrIV	8140447	8141030	neuroPSI:0.88655095	950	+	8140447	8141030	0	2	50,50	0,533
chrIII	8160457	8160606	neuroPSI:0.87384483	950	-	8160457	8160606	0	2	50,50	0,99
chrIII	8160464	8160606	neuroPSI:0.12615517	950	-	8160464	8160606	0	2	50,50	0,92
chrII	8169917	8170291	neuroPSI:0.64169813	950	-	8169917	8170291	0	2	50,50	0,324
chrII	8169917	8170366	neuroPSI:0.35830187	950	-	8169917	8170366	0	2	50,50	0,399
chrII	8228143	8228294	neuroPSI:0.82564804	950	+	8228143	8228294	0	2	50,50	0,101
chrII	8228143	8228288	neuroPSI:0.17435196	950	+	8228143	8228288	0	2	50,50	0,95
chrII	8276789	8276938	neuroPSI:0.92484911	950	+	8276789	8276938	0	2	50,50	0,99
chrII	8276789	8276930	neuroPSI:0.07515089	950	+	8276789	8276930	0	2	50,50	0,91
chrI	8290379	8290532	neuroPSI:0.47409781	950	-	8290379	8290532	0	2	50,50	0,103
chrI	8290382	8290532	neuroPSI:0.52590219	950	-	8290382	8290532	0	2	50,50	0,100
chrIII	8332226	8332369	neuroPSI:0.87076719	950	+	8332226	8332369	0	2	50,50	0,93
chrIII	8332226	8332372	neuroPSI:0.12923281	950	+	8332226	8332372	0	2	50,50	0,96
chrV	8385507	8385917	neuroPSI:0.32971364	950	-	8385507	8385917	0	2	50,50	0,360
chrV	8385504	8385917	neuroPSI:0.67028636	950	-	8385504	8385917	0	2	50,50	0,363
chrIII	8406056	8406421	neuroPSI:0.55167720	950	+	8406056	8406421	0	2	50,50	0,315
chrIII	8406056	8406415	neuroPSI:0.44832280	950	+	8406056	8406415	0	2	50,50	0,309
chrI	8408446	8409183	neuroPSI:0.90857747	950	-	8408446	8409183	0	2	50,50	0,687
chrI	8408453	8409183	neuroPSI:0.09142253	950	-	8408453	8409183	0	2	50,50	0,680
chrI	8422757	8422909	neuroPSI:0.74420317	950	+	8422757	8422909	0	2	50,50	0,102
chrI	8422757	8422903	neuroPSI:0.25579683	950	+	8422757	8422903	0	2	50,50	0,96
chrII	8425565	8426087	neuroPSI:0.24165103	950	-	8425565	8426087	0	2	50,50	0,472
chrII	8425565	8426081	neuroPSI:0.75834897	950	-	8425565	8426081	0	2	50,50	0,466
chrIII	8429902	8430050	neuroPSI:0.76344262	950	+	8429902	8430050	0	2	50,50	0,98
chrIII	8429898	8430050	neuroPSI:0.23655738	950	+	8429898	8430050	0	2	50,50	0,102
chrII	8442750	8442896	neuroPSI:0.86440633	950	+	8442750	8442896	0	2	50,50	0,96
chrII	8442750	8442890	neuroPSI:0.13559367	950	+	8442750	8442890	0	2	50,50	0,90
chrII	8453916	8454064	neuroPSI:0.35551410	950	-	8453916	8454064	0	2	50,50	0,98
chrII	8453908	8454064	neuroPSI:0.64448590	950	-	8453908	8454064	0	2	50,50	0,106
chrX	8474265	8474411	neuroPSI:0.38611501	950	-	8474265	8474411	0	2	50,50	0,96
chrX	8474257	8474411	neuroPSI:0.61388499	950	-	8474257	8474411	0	2	50,50	0,104
chrIII	8479286	8479445	neuroPSI:0.91772134	950	-	8479286	8479445	0	2	50,50	0,109
chrIII	8479293	8479445	neuroPSI:0.08227866	950	-	8479293	8479445	0	2	50,50	0,102
chrIII	8487470	8487749	neuroPSI:0.75483815	950	+	8487470	8487749	0	2	50,50	0,229
chrIII	8487470	8487797	neuroPSI:0.24516185	950	+	8487470	8487797	0	2	50,50	0,277
chrIII	8488763	8488990	neuroPSI:0.79099917	950	-	8488763	8488990	0	2	50,50	0,177
chrIII	8488769	8488990	neuroPSI:0.20900083	950	-	8488769	8488990	0	2	50,50	0,171
chrIV	8501760	8501910	neuroPSI:0.61637260	950	+	8501760	8501910	0	2	50,50	0,100
chrIV	8501760	8501907	neuroPSI:0.38362740	950	+	8501760	8501907	0	2	50,50	0,97
chrIV	8503921	8504106	neuroPSI:0.90650935	950	-	8503921	8504106	0	2	50,50	0,135
chrIV	8503927	8504106	neuroPSI:0.09349065	950	-	8503927	8504106	0	2	50,50	0,129
chrV	8514812	8514961	neuroPSI:0.64069239	950	-	8514812	8514961	0	2	50,50	0,99
chrV	8514821	8514961	neuroPSI:0.35930761	950	-	8514821	8514961	0	2	50,50	0,90
chrV	8519503	8519658	neuroPSI:0.88037010	950	-	8519503	8519658	0	2	50,50	0,105
chrV	8519503	8519650	neuroPSI:0.11962990	950	-	8519503	8519650	0	2	50,50	0,97
chrIV	8536657	8536954	neuroPSI:0.92928510	950	+	8536657	8536954	0	2	50,50	0,247
chrIV	8536729	8536954	neuroPSI:0.07071490	950	+	8536729	8536954	0	2	50,50	0,175
chrIII	8541901	8542115	neuroPSI:0.46016129	950	+	8541901	8542115	0	2	50,50	0,164
chrIII	8541889	8542115	neuroPSI:0.53983871	950	+	8541889	8542115	0	2	50,50	0,176
chrIII	8592070	8592212	neuroPSI:0.41452991	950	-	8592070	8592212	0	2	50,50	0,92
chrIII	8592064	8592212	neuroPSI:0.58547009	950	-	8592064	8592212	0	2	50,50	0,98
chrI	8593599	8594086	neuroPSI:0.21603917	950	+	8593599	8594086	0	2	50,50	0,437
chrI	8593599	8594092	neuroPSI:0.78396083	950	+	8593599	8594092	0	2	50,50	0,443
chrIV	8598042	8598418	neuroPSI:0.94120849	950	+	8598042	8598418	0	2	50,50	0,326
chrIV	8598042	8598465	neuroPSI:0.05879151	950	+	8598042	8598465	0	2	50,50	0,373
chrIV	8609259	8609475	neuroPSI:0.90460844	950	+	8609259	8609475	0	2	50,50	0,166
chrIV	8609243	8609475	neuroPSI:0.09539156	950	+	8609243	8609475	0	2	50,50	0,182
chrV	8629738	8629892	neuroPSI:0.64575547	950	-	8629738	8629892	0	2	50,50	0,104
chrV	8629749	8629892	neuroPSI:0.35424453	950	-	8629749	8629892	0	2	50,50	0,93
chrX	8700726	8701158	neuroPSI:0.67218842	950	+	8700726	8701158	0	2	50,50	0,382
chrX	8700726	8701146	neuroPSI:0.32781158	950	+	8700726	8701146	0	2	50,50	0,370
chrI	8701381	8701576	neuroPSI:0.17166107	950	-	8701381	8701576	0	2	50,50	0,145
chrI	8701372	8701576	neuroPSI:0.82833893	950	-	8701372	8701576	0	2	50,50	0,154
chrX	8701818	8701966	neuroPSI:0.36161616	950	+	8701818	8701966	0	2	50,50	0,98
chrX	8701806	8701966	neuroPSI:0.63838384	950	+	8701806	8701966	0	2	50,50	0,110
chrI	8707509	8707846	neuroPSI:0.34023715	950	-	8707509	8707846	0	2	50,50	0,287
chrI	8707509	8708134	neuroPSI:0.65976285	950	-	8707509	8708134	0	2	50,50	0,575
chrII	8715525	8715670	neuroPSI:0.09251671	950	+	8715525	8715670	0	2	50,50	0,95
chrII	8715521	8715670	neuroPSI:0.90748329	950	+	8715521	8715670	0	2	50,50	0,99
chrIV	8718704	8718857	neuroPSI:0.22863176	950	+	8718704	8718857	0	2	50,50	0,103
chrIV	8718704	8718846	neuroPSI:0.77136824	950	+	8718704	8718846	0	2	50,50	0,92
chrI	8741074	8741238	neuroPSI:0.40190860	950	+	8741074	8741238	0	2	50,50	0,114
chrI	8741074	8741247	neuroPSI:0.59809140	950	+	8741074	8741247	0	2	50,50	0,123
chrIV	8778867	8779428	neuroPSI:0.55902778	950	-	8778867	8779428	0	2	50,50	0,511
chrIV	8778863	8779428	neuroPSI:0.44097222	950	-	8778863	8779428	0	2	50,50	0,515
chrII	8784998	8785187	neuroPSI:0.42720584	950	+	8784998	8785187	0	2	50,50	0,139
chrII	8784998	8785194	neuroPSI:0.57279416	950	+	8784998	8785194	0	2	50,50	0,146
chrV	8788005	8788243	neuroPSI:0.28680556	950	+	8788005	8788243	0	2	50,50	0,188
chrV	8788005	8788249	neuroPSI:0.71319444	950	+	8788005	8788249	0	2	50,50	0,194
chrIV	8792392	8792607	neuroPSI:0.40024286	950	-	8792392	8792607	0	2	50,50	0,165
chrIV	8792392	8792616	neuroPSI:0.59975714	950	-	8792392	8792616	0	2	50,50	0,174
chrX	8802338	8802609	neuroPSI:0.62698413	950	-	8802338	8802609	0	2	50,50	0,221
chrX	8802338	8802573	neuroPSI:0.37301587	950	-	8802338	8802573	0	2	50,50	0,185
chrI	8806149	8806289	neuroPSI:0.10261081	950	-	8806149	8806289	0	2	50,50	0,90
chrI	8806143	8806289	neuroPSI:0.89738919	950	-	8806143	8806289	0	2	50,50	0,96
chrIII	8829062	8829209	neuroPSI:0.91901331	950	-	8829062	8829209	0	2	50,50	0,97
chrIII	8829068	8829209	neuroPSI:0.08098669	950	-	8829068	8829209	0	2	50,50	0,91
chrIII	8829754	8829897	neuroPSI:0.09119224	950	-	8829754	8829897	0	2	50,50	0,93
chrIII	8829742	8829897	neuroPSI:0.90880776	950	-	8829742	8829897	0	2	50,50	0,105
chrIV	8859831	8860057	neuroPSI:0.84082007	950	+	8859831	8860057	0	2	50,50	0,176
chrIV	8859831	8860131	neuroPSI:0.15917993	950	+	8859831	8860131	0	2	50,50	0,250
chrII	8878732	8879448	neuroPSI:0.23903243	950	-	8878732	8879448	0	2	50,50	0,666
chrII	8878852	8879448	neuroPSI:0.76096757	950	-	8878852	8879448	0	2	50,50	0,546
chrIV	8891922	8892095	neuroPSI:0.64722359	950	+	8891922	8892095	0	2	50,50	0,123
chrIV	8891922	8892098	neuroPSI:0.35277641	950	+	8891922	8892098	0	2	50,50	0,126
chrV	8900659	8900997	neuroPSI:0.18914807	950	+	8900659	8900997	0	2	50,50	0,288
chrV	8900659	8901005	neuroPSI:0.81085193	950	+	8900659	8901005	0	2	50,50	0,296
chrIII	8903568	8903708	neuroPSI:0.30124069	950	-	8903568	8903708	0	2	50,50	0,90
chrIII	8903562	8903708	neuroPSI:0.69875931	950	-	8903562	8903708	0	2	50,50	0,96
chrI	8922771	8922916	neuroPSI:0.09852151	950	+	8922771	8922916	0	2	50,50	0,95
chrI	8922771	8922912	neuroPSI:0.90147849	950	+	8922771	8922912	0	2	50,50	0,91
chrIV	8926375	8926521	neuroPSI:0.27271054	950	+	8926375	8926521	0	2	50,50	0,96
chrIV	8926375	8926527	neuroPSI:0.72728946	950	+	8926375	8926527	0	2	50,50	0,102
chrIV	8927821	8927973	neuroPSI:0.76226636	950	+	8927821	8927973	0	2	50,50	0,102
chrIV	8927821	8927967	neuroPSI:0.23773364	950	+	8927821	8927967	0	2	50,50	0,96
chrIII	8934818	8934966	neuroPSI:0.92969869	950	+	8934818	8934966	0	2	50,50	0,98
chrIII	8934818	8934970	neuroPSI:0.07030131	950	+	8934818	8934970	0	2	50,50	0,102
chrV	8969824	8969976	neuroPSI:0.67410714	950	-	8969824	8969976	0	2	50,50	0,102
chrV	8969758	8969976	neuroPSI:0.32589286	950	-	8969758	8969976	0	2	50,50	0,168
chrV	8991133	8991382	neuroPSI:0.59412651	950	+	8991133	8991382	0	2	50,50	0,199
chrV	8991133	8991439	neuroPSI:0.40587349	950	+	8991133	8991439	0	2	50,50	0,256
chrII	8998839	8998982	neuroPSI:0.29130064	950	+	8998839	8998982	0	2	50,50	0,93
chrII	8998839	8998991	neuroPSI:0.70869936	950	+	8998839	8998991	0	2	50,50	0,102
chrII	9003494	9003639	neuroPSI:0.91212831	950	-	9003494	9003639	0	2	50,50	0,95
chrII	9003480	9003639	neuroPSI:0.08787169	950	-	9003480	9003639	0	2	50,50	0,109
chrI	9009896	9010116	neuroPSI:0.28897277	950	-	9009896	9010116	0	2	50,50	0,170
chrI	9009887	9010116	neuroPSI:0.71102723	950	-	9009887	9010116	0	2	50,50	0,179
chrIII	9052321	9052471	neuroPSI:0.75688524	950	-	9052321	9052471	0	2	50,50	0,100
chrIII	9052327	9052471	neuroPSI:0.24311476	950	-	9052327	9052471	0	2	50,50	0,94
chrIII	9058171	9058313	neuroPSI:0.25999164	950	+	9058171	9058313	0	2	50,50	0,92
chrIII	9058171	9058322	neuroPSI:0.74000836	950	+	9058171	9058322	0	2	50,50	0,101
chrIV	9070195	9070728	neuroPSI:0.39000000	950	+	9070195	9070728	0	2	50,50	0,483
chrIV	9070195	9070737	neuroPSI:0.61000000	950	+	9070195	9070737	0	2	50,50	0,492
chrIV	9085611	9085761	neuroPSI:0.85350877	950	+	9085611	9085761	0	2	50,50	0,100
chrIV	9085611	9085791	neuroPSI:0.14649123	950	+	9085611	9085791	0	2	50,50	0,130
chrIV	9086618	9087370	neuroPSI:0.25826954	950	+	9086618	9087370	0	2	50,50	0,702
chrIV	9086618	9087328	neuroPSI:0.74173046	950	+	9086618	9087328	0	2	50,50	0,660
chrI	9102847	9103048	neuroPSI:0.63300254	950	-	9102847	9103048	0	2	50,50	0,151
chrI	9102847	9103096	neuroPSI:0.36699746	950	-	9102847	9103096	0	2	50,50	0,199
chrIV	9102985	9103132	neuroPSI:0.94753086	950	-	9102985	9103132	0	2	50,50	0,97
chrIV	9102980	9103132	neuroPSI:0.05246914	950	-	9102980	9103132	0	2	50,50	0,102
chrI	9104974	9105909	neuroPSI:0.72129187	950	-	9104974	9105909	0	2	50,50	0,885
chrI	9104974	9105744	neuroPSI:0.27870813	950	-	9104974	9105744	0	2	50,50	0,720
chrII	9109811	9109972	neuroPSI:0.94027418	950	+	9109811	9109972	0	2	50,50	0,111
chrII	9109811	9109966	neuroPSI:0.05972582	950	+	9109811	9109966	0	2	50,50	0,105
chrX	9115966	9116172	neuroPSI:0.13426501	950	+	9115966	9116172	0	2	50,50	0,156
chrX	9115966	9116114	neuroPSI:0.86573499	950	+	9115966	9116114	0	2	50,50	0,98
chrI	9121140	9121783	neuroPSI:0.23717949	950	+	9121140	9121783	0	2	50,50	0,593
chrI	9121140	9121790	neuroPSI:0.76282051	950	+	9121140	9121790	0	2	50,50	0,600
chrI	9134388	9135036	neuroPSI:0.86841354	950	+	9134388	9135036	0	2	50,50	0,598
chrI	9134388	9135024	neuroPSI:0.13158646	950	+	9134388	9135024	0	2	50,50	0,586
chrX	9143309	9144125	neuroPSI:0.63647061	950	+	9143309	9144125	0	2	50,50	0,766
chrX	9143333	9144125	neuroPSI:0.36352939	950	+	9143333	9144125	0	2	50,50	0,742
chrIV	9145385	9145570	neuroPSI:0.58893819	950	+	9145385	9145570	0	2	50,50	0,135
chrIV	9145385	9145537	neuroPSI:0.41106181	950	+	9145385	9145537	0	2	50,50	0,102
chrIII	9167858	9168009	neuroPSI:0.77082395	950	+	9167858	9168009	0	2	50,50	0,101
chrIII	9167858	9168015	neuroPSI:0.22917605	950	+	9167858	9168015	0	2	50,50	0,107
chrV	9193962	9194694	neuroPSI:0.57860143	950	+	9193962	9194694	0	2	50,50	0,682
chrV	9193941	9194694	neuroPSI:0.42139857	950	+	9193941	9194694	0	2	50,50	0,703
chrI	9223030	9223489	neuroPSI:0.82575684	950	-	9223030	9223489	0	2	50,50	0,409
chrI	9223036	9223489	neuroPSI:0.17424316	950	-	9223036	9223489	0	2	50,50	0,403
chrIV	9262552	9262707	neuroPSI:0.25357143	950	-	9262552	9262707	0	2	50,50	0,105
chrIV	9262561	9262707	neuroPSI:0.74642857	950	-	9262561	9262707	0	2	50,50	0,96
chrI	9310950	9311424	neuroPSI:0.10623816	950	+	9310950	9311424	0	2	50,50	0,424
chrI	9311064	9311424	neuroPSI:0.89376184	950	+	9311064	9311424	0	2	50,50	0,310
chrX	9315722	9315868	neuroPSI:0.22645446	950	-	9315722	9315868	0	2	50,50	0,96
chrX	9315710	9315868	neuroPSI:0.77354554	950	-	9315710	9315868	0	2	50,50	0,108
chrIII	9323086	9323233	neuroPSI:0.57267442	950	+	9323086	9323233	0	2	50,50	0,97
chrIII	9323086	9323226	neuroPSI:0.42732558	950	+	9323086	9323226	0	2	50,50	0,90
chrV	9332875	9333027	neuroPSI:0.78876862	950	-	9332875	9333027	0	2	50,50	0,102
chrV	9332881	9333027	neuroPSI:0.21123138	950	-	9332881	9333027	0	2	50,50	0,96
chrIV	9340953	9341403	neuroPSI:0.74037703	950	-	9340953	9341403	0	2	50,50	0,400
chrIV	9340959	9341403	neuroPSI:0.25962297	950	-	9340959	9341403	0	2	50,50	0,394
chrX	9344256	9344415	neuroPSI:0.69722602	950	-	9344256	9344415	0	2	50,50	0,109
chrX	9344256	9344409	neuroPSI:0.30277398	950	-	9344256	9344409	0	2	50,50	0,103
chrV	9346733	9346889	neuroPSI:0.46203830	950	-	9346733	9346889	0	2	50,50	0,106
chrV	9346733	9346887	neuroPSI:0.53796170	950	-	9346733	9346887	0	2	50,50	0,104
chrV	9357020	9357781	neuroPSI:0.64222715	950	-	9357020	9357781	0	2	50,50	0,711
chrV	9357020	9357795	neuroPSI:0.35777285	950	-	9357020	9357795	0	2	50,50	0,725
chrI	9362787	9363869	neuroPSI:0.79551966	950	+	9362787	9363869	0	2	50,50	0,1032
chrI	9362770	9363869	neuroPSI:0.20448034	950	+	9362770	9363869	0	2	50,50	0,1049
chrIII	9384305	9384456	neuroPSI:0.47101449	950	-	9384305	9384456	0	2	50,50	0,101
chrIII	9384314	9384456	neuroPSI:0.52898551	950	-	9384314	9384456	0	2	50,50	0,92
chrII	9410881	9411186	neuroPSI:0.33048058	950	-	9410881	9411186	0	2	50,50	0,255
chrII	9410846	9411186	neuroPSI:0.66951942	950	-	9410846	9411186	0	2	50,50	0,290
chrIV	9464967	9465120	neuroPSI:0.86846604	950	-	9464967	9465120	0	2	50,50	0,103
chrIV	9464973	9465120	neuroPSI:0.13153396	950	-	9464973	9465120	0	2	50,50	0,97
chrIII	9491679	9492189	neuroPSI:0.10672366	950	+	9491679	9492189	0	2	50,50	0,460
chrIII	9491679	9491940	neuroPSI:0.89327634	950	+	9491679	9491940	0	2	50,50	0,211
chrI	9509371	9509512	neuroPSI:0.18517508	950	+	9509371	9509512	0	2	50,50	0,91
chrI	9509371	9509518	neuroPSI:0.81482492	950	+	9509371	9509518	0	2	50,50	0,97
chrX	9515279	9515429	neuroPSI:0.16828979	950	+	9515279	9515429	0	2	50,50	0,100
chrX	9515279	9515423	neuroPSI:0.83171021	950	+	9515279	9515423	0	2	50,50	0,94
chrV	9557668	9558042	neuroPSI:0.58789588	950	-	9557668	9558042	0	2	50,50	0,324
chrV	9557671	9558042	neuroPSI:0.36268355	950	-	9557671	9558042	0	2	50,50	0,321
chrIII	9562632	9562784	neuroPSI:0.17861730	950	-	9562632	9562784	0	2	50,50	0,102
chrIII	9562632	9562780	neuroPSI:0.82138270	950	-	9562632	9562780	0	2	50,50	0,98
chrX	9571056	9572129	neuroPSI:0.08840053	950	+	9571056	9572129	0	2	50,50	0,1023
chrX	9571086	9572129	neuroPSI:0.91159947	950	+	9571086	9572129	0	2	50,50	0,993
chrX	9574205	9574353	neuroPSI:0.45641672	950	-	9574205	9574353	0	2	50,50	0,98
chrX	9574205	9574359	neuroPSI:0.54358328	950	-	9574205	9574359	0	2	50,50	0,104
chrV	9613731	9613891	neuroPSI:0.17938206	950	+	9613731	9613891	0	2	50,50	0,110
chrV	9613746	9613891	neuroPSI:0.82061794	950	+	9613746	9613891	0	2	50,50	0,95
chrIII	9614656	9614805	neuroPSI:0.84756426	950	+	9614656	9614805	0	2	50,50	0,99
chrIII	9614656	9614799	neuroPSI:0.15243574	950	+	9614656	9614799	0	2	50,50	0,93
chrIII	9623726	9623885	neuroPSI:0.13791121	950	+	9623726	9623885	0	2	50,50	0,109
chrIII	9623726	9623879	neuroPSI:0.86208879	950	+	9623726	9623879	0	2	50,50	0,103
chrII	9641154	9641338	neuroPSI:0.87055556	950	-	9641154	9641338	0	2	50,50	0,134
chrII	9641160	9641338	neuroPSI:0.12944444	950	-	9641160	9641338	0	2	50,50	0,128
chrIV	9651934	9652208	neuroPSI:0.89271430	950	+	9651934	9652208	0	2	50,50	0,224
chrIV	9651976	9652208	neuroPSI:0.10728570	950	+	9651976	9652208	0	2	50,50	0,182
chrV	9668924	9669766	neuroPSI:0.34037008	950	+	9668924	9669766	0	2	50,50	0,792
chrV	9668936	9669766	neuroPSI:0.65962992	950	+	9668936	9669766	0	2	50,50	0,780
chrII	9670996	9671299	neuroPSI:0.21932306	950	+	9670996	9671299	0	2	50,50	0,253
chrII	9670996	9671305	neuroPSI:0.78067694	950	+	9670996	9671305	0	2	50,50	0,259
chrI	9674267	9674715	neuroPSI:0.75393592	950	-	9674267	9674715	0	2	50,50	0,398
chrI	9674273	9674715	neuroPSI:0.24606408	950	-	9674273	9674715	0	2	50,50	0,392
chrX	9674538	9674683	neuroPSI:0.16381102	950	-	9674538	9674683	0	2	50,50	0,95
chrX	9674541	9674683	neuroPSI:0.83618898	950	-	9674541	9674683	0	2	50,50	0,92
chrIII	9691315	9691713	neuroPSI:0.06098987	950	-	9691315	9691713	0	2	50,50	0,348
chrIII	9691315	9691751	neuroPSI:0.93901013	950	-	9691315	9691751	0	2	50,50	0,386
chrV	9693548	9693699	neuroPSI:0.16770833	950	+	9693548	9693699	0	2	50,50	0,101
chrV	9693548	9693704	neuroPSI:0.83229167	950	+	9693548	9693704	0	2	50,50	0,106
chrIII	9707148	9707307	neuroPSI:0.79938080	950	+	9707148	9707307	0	2	50,50	0,109
chrIII	9707148	9707298	neuroPSI:0.20061920	950	+	9707148	9707298	0	2	50,50	0,100
chrI	9724902	9725048	neuroPSI:0.93219470	950	+	9724902	9725048	0	2	50,50	0,96
chrI	9724864	9725016	neuroPSI:0.06780530	950	+	9724864	9725016	0	2	50,50	0,102
chrIV	9732850	9732996	neuroPSI:0.30237203	950	-	9732850	9732996	0	2	50,50	0,96
chrIV	9732841	9732996	neuroPSI:0.69762797	950	-	9732841	9732996	0	2	50,50	0,105
chrI	9743059	9743442	neuroPSI:0.20469045	950	+	9743059	9743442	0	2	50,50	0,333
chrI	9743059	9743436	neuroPSI:0.79530955	950	+	9743059	9743436	0	2	50,50	0,327
chrII	9748276	9748474	neuroPSI:0.29450796	950	+	9748276	9748474	0	2	50,50	0,148
chrII	9748276	9748483	neuroPSI:0.70549204	950	+	9748276	9748483	0	2	50,50	0,157
chrII	9749753	9749898	neuroPSI:0.31480032	950	+	9749753	9749898	0	2	50,50	0,95
chrII	9749753	9749905	neuroPSI:0.68519968	950	+	9749753	9749905	0	2	50,50	0,102
chrX	9751489	9751864	neuroPSI:0.80014430	950	+	9751489	9751864	0	2	50,50	0,325
chrX	9751489	9751795	neuroPSI:0.19985570	950	+	9751489	9751795	0	2	50,50	0,256
chrV	9766937	9767492	neuroPSI:0.76778442	950	-	9766937	9767492	0	2	50,50	0,505
chrV	9766982	9767492	neuroPSI:0.23221558	950	-	9766982	9767492	0	2	50,50	0,460
chrX	9772977	9773126	neuroPSI:0.05393333	950	-	9772977	9773126	0	2	50,50	0,99
chrX	9772977	9773123	neuroPSI:0.94606667	950	-	9772977	9773123	0	2	50,50	0,96
chrIII	9773108	9773467	neuroPSI:0.58178837	950	+	9773108	9773467	0	2	50,50	0,309
chrIII	9773108	9773380	neuroPSI:0.41821163	950	+	9773108	9773380	0	2	50,50	0,222
chrV	9776274	9776712	neuroPSI:0.23129114	950	-	9776274	9776712	0	2	50,50	0,388
chrV	9776267	9776712	neuroPSI:0.76870886	950	-	9776267	9776712	0	2	50,50	0,395
chrV	9779360	9779509	neuroPSI:0.46358543	950	-	9779360	9779509	0	2	50,50	0,99
chrV	9779360	9779505	neuroPSI:0.53641457	950	-	9779360	9779505	0	2	50,50	0,95
chrV	9781150	9781473	neuroPSI:0.44642857	950	-	9781150	9781473	0	2	50,50	0,273
chrV	9781276	9781473	neuroPSI:0.55357143	950	-	9781276	9781473	0	2	50,50	0,147
chrI	9781468	9781613	neuroPSI:0.49329033	950	-	9781468	9781613	0	2	50,50	0,95
chrI	9781459	9781613	neuroPSI:0.50670967	950	-	9781459	9781613	0	2	50,50	0,104
chrI	9782778	9783285	neuroPSI:0.38471673	950	-	9782778	9783285	0	2	50,50	0,457
chrI	9782772	9783285	neuroPSI:0.61528327	950	-	9782772	9783285	0	2	50,50	0,463
chrIII	9784838	9784992	neuroPSI:0.92599883	950	+	9784838	9784992	0	2	50,50	0,104
chrIII	9784838	9784984	neuroPSI:0.07400117	950	+	9784838	9784984	0	2	50,50	0,96
chrX	9798930	9799743	neuroPSI:0.05732943	950	+	9798930	9799743	0	2	50,50	0,763
chrX	9798930	9799728	neuroPSI:0.94267057	950	+	9798930	9799728	0	2	50,50	0,748
chrI	9844184	9844338	neuroPSI:0.75522267	950	+	9844184	9844338	0	2	50,50	0,104
chrI	9844184	9844347	neuroPSI:0.24477733	950	+	9844184	9844347	0	2	50,50	0,113
chrV	9850337	9850479	neuroPSI:0.27265038	950	-	9850337	9850479	0	2	50,50	0,92
chrV	9850330	9850479	neuroPSI:0.72734962	950	-	9850330	9850479	0	2	50,50	0,99
chrI	9861413	9861562	neuroPSI:0.83970162	950	+	9861413	9861562	0	2	50,50	0,99
chrI	9861415	9861562	neuroPSI:0.16029838	950	+	9861415	9861562	0	2	50,50	0,97
chrI	9872999	9873148	neuroPSI:0.69908419	950	+	9872999	9873148	0	2	50,50	0,99
chrI	9872996	9873148	neuroPSI:0.30091581	950	+	9872996	9873148	0	2	50,50	0,102
chrI	9880165	9880311	neuroPSI:0.35558421	950	-	9880165	9880311	0	2	50,50	0,96
chrI	9880156	9880311	neuroPSI:0.64441579	950	-	9880156	9880311	0	2	50,50	0,105
chrV	9893834	9893992	neuroPSI:0.29725117	950	+	9893834	9893992	0	2	50,50	0,108
chrV	9893825	9893992	neuroPSI:0.70274883	950	+	9893825	9893992	0	2	50,50	0,117
chrI	9901756	9902050	neuroPSI:0.18623323	950	+	9901756	9902050	0	2	50,50	0,244
chrI	9901714	9902050	neuroPSI:0.81376677	950	+	9901714	9902050	0	2	50,50	0,286
chrX	9926964	9927118	neuroPSI:0.62390199	950	-	9926964	9927118	0	2	50,50	0,104
chrX	9926974	9927118	neuroPSI:0.37609801	950	-	9926974	9927118	0	2	50,50	0,94
chrII	9930281	9930497	neuroPSI:0.50520159	950	+	9930281	9930497	0	2	50,50	0,166
chrII	9930281	9930503	neuroPSI:0.49479841	950	+	9930281	9930503	0	2	50,50	0,172
chrII	9941269	9941416	neuroPSI:0.46250000	950	+	9941269	9941416	0	2	50,50	0,97
chrII	9941269	9941422	neuroPSI:0.53750000	950	+	9941269	9941422	0	2	50,50	0,103
chrIII	9951529	9951742	neuroPSI:0.82841760	950	-	9951529	9951742	0	2	50,50	0,163
chrIII	9951529	9951800	neuroPSI:0.17158240	950	-	9951529	9951800	0	2	50,50	0,221
chrV	9989602	9989742	neuroPSI:0.87021751	950	-	9989602	9989742	0	2	50,50	0,90
chrV	9989598	9989742	neuroPSI:0.12978249	950	-	9989598	9989742	0	2	50,50	0,94
chrX	9997780	9997932	neuroPSI:0.87266227	950	-	9997780	9997932	0	2	50,50	0,102
chrX	9997771	9997932	neuroPSI:0.12733773	950	-	9997771	9997932	0	2	50,50	0,111
chrV	10001517	10002416	neuroPSI:0.77300049	950	+	10001517	10002416	0	2	50,50	0,849
chrV	10001509	10002416	neuroPSI:0.22699951	950	+	10001509	10002416	0	2	50,50	0,857
chrI	10020373	10020522	neuroPSI:0.63917604	950	+	10020373	10020522	0	2	50,50	0,99
chrI	10020373	10020515	neuroPSI:0.36082396	950	+	10020373	10020515	0	2	50,50	0,92
chrX	10036946	10037416	neuroPSI:0.66566265	950	-	10036946	10037416	0	2	50,50	0,420
chrX	10036456	10037416	neuroPSI:0.33433735	950	-	10036456	10037416	0	2	50,50	0,910
chrI	10083103	10083247	neuroPSI:0.48135714	950	+	10083103	10083247	0	2	50,50	0,94
chrI	10083103	10083253	neuroPSI:0.51864286	950	+	10083103	10083253	0	2	50,50	0,100
chrIII	10114316	10114457	neuroPSI:0.71977584	950	-	10114316	10114457	0	2	50,50	0,91
chrIII	10114316	10114462	neuroPSI:0.28022416	950	-	10114316	10114462	0	2	50,50	0,96
chrIII	10115883	10116033	neuroPSI:0.85551416	950	+	10115883	10116033	0	2	50,50	0,100
chrIII	10115883	10116025	neuroPSI:0.14448584	950	+	10115883	10116025	0	2	50,50	0,92
chrI	10120747	10120894	neuroPSI:0.75925926	950	-	10120747	10120894	0	2	50,50	0,97
chrI	10120747	10120890	neuroPSI:0.24074074	950	-	10120747	10120890	0	2	50,50	0,93
chrV	10160598	10160931	neuroPSI:0.46546554	950	-	10160598	10160931	0	2	50,50	0,283
chrV	10160598	10160926	neuroPSI:0.53453446	950	-	10160598	10160926	0	2	50,50	0,278
chrI	10162435	10162590	neuroPSI:0.05833365	950	+	10162435	10162590	0	2	50,50	0,105
chrI	10162435	10162581	neuroPSI:0.94166635	950	+	10162435	10162581	0	2	50,50	0,96
chrV	10182252	10182454	neuroPSI:0.93990491	950	+	10182252	10182454	0	2	50,50	0,152
chrV	10182293	10182454	neuroPSI:0.06009509	950	+	10182293	10182454	0	2	50,50	0,111
chrI	10187167	10187309	neuroPSI:0.52873383	950	+	10187167	10187309	0	2	50,50	0,92
chrI	10187167	10187321	neuroPSI:0.47126617	950	+	10187167	10187321	0	2	50,50	0,104
chrX	10199552	10199855	neuroPSI:0.54679792	950	+	10199552	10199855	0	2	50,50	0,253
chrX	10199552	10199813	neuroPSI:0.45320208	950	+	10199552	10199813	0	2	50,50	0,211
chrIV	10220551	10220699	neuroPSI:0.82762111	950	-	10220551	10220699	0	2	50,50	0,98
chrIV	10220557	10220699	neuroPSI:0.17237889	950	-	10220557	10220699	0	2	50,50	0,92
chrIV	10223220	10223374	neuroPSI:0.90070590	950	+	10223220	10223374	0	2	50,50	0,104
chrIV	10223220	10223364	neuroPSI:0.09929410	950	+	10223220	10223364	0	2	50,50	0,94
chrV	10253867	10254133	neuroPSI:0.07248246	950	-	10253867	10254133	0	2	50,50	0,216
chrV	10253867	10254065	neuroPSI:0.92751754	950	-	10253867	10254065	0	2	50,50	0,148
chrIII	10253620	10254486	neuroPSI:0.48197767	950	+	10253620	10254486	0	2	50,50	0,816
chrIII	10253614	10254486	neuroPSI:0.51802233	950	+	10253614	10254486	0	2	50,50	0,822
chrII	10266136	10266702	neuroPSI:0.77194767	950	+	10266136	10266702	0	2	50,50	0,516
chrII	10266136	10266696	neuroPSI:0.22805233	950	+	10266136	10266696	0	2	50,50	0,510
chrIII	10287716	10288252	neuroPSI:0.06107139	950	+	10287716	10288252	0	2	50,50	0,486
chrIII	10287716	10288246	neuroPSI:0.93892861	950	+	10287716	10288246	0	2	50,50	0,480
chrIII	10354215	10354362	neuroPSI:0.89445523	950	+	10354215	10354362	0	2	50,50	0,97
chrIII	10354215	10354356	neuroPSI:0.10554477	950	+	10354215	10354356	0	2	50,50	0,91
chrV	10363046	10363202	neuroPSI:0.77398102	950	+	10363046	10363202	0	2	50,50	0,106
chrV	10363046	10363193	neuroPSI:0.22601898	950	+	10363046	10363193	0	2	50,50	0,97
chrI	10371296	10371550	neuroPSI:0.42872680	950	+	10371296	10371550	0	2	50,50	0,204
chrI	10371240	10371550	neuroPSI:0.57127320	950	+	10371240	10371550	0	2	50,50	0,260
chrII	10386649	10386793	neuroPSI:0.85183235	950	+	10386649	10386793	0	2	50,50	0,94
chrII	10386649	10386805	neuroPSI:0.14816765	950	+	10386649	10386805	0	2	50,50	0,106
chrII	10397784	10398172	neuroPSI:0.30227743	950	+	10397784	10398172	0	2	50,50	0,338
chrII	10397730	10398172	neuroPSI:0.69772257	950	+	10397730	10398172	0	2	50,50	0,392
chrX	10400210	10400526	neuroPSI:0.30459184	950	+	10400210	10400526	0	2	50,50	0,266
chrX	10400192	10400526	neuroPSI:0.69540816	950	+	10400192	10400526	0	2	50,50	0,284
chrIII	10418257	10418850	neuroPSI:0.38480145	950	+	10418257	10418850	0	2	50,50	0,543
[truncated: 1,454 more rows]

## Sheet: Dopaminergic_AltSplicing
Dopaminergic neurons: alternative splicing events
Cassette
track name=dat_cassette description='dat_cassette'
chrV	38219	39040	datPSI:0.48285411	950	+	38219	39040	0	2	50,50	0,771
chrV	38219	40503	datPSI:0.51714589	950	+	38219	40503	0	2	50,50	0,2234
chrV	38976	40503	datPSI:0.48077180	950	+	38976	40503	0	2	50,50	0,1477
chrII	96959	97108	datPSI:0.28982562	950	-	96959	97108	0	2	50,50	0,99
chrII	96757	97108	datPSI:0.71017438	950	-	96757	97108	0	2	50,50	0,301
chrII	96757	96930	datPSI:0.26562155	950	-	96757	96930	0	2	50,50	0,123
chrII	167028	167953	datPSI:0.61042844	950	+	167028	167953	0	2	50,50	0,875
chrII	167028	167223	datPSI:0.38957156	950	+	167028	167223	0	2	50,50	0,145
chrII	167336	167953	datPSI:0.57119325	950	+	167336	167953	0	2	50,50	0,567
chrII	226724	227985	datPSI:0.21136264	950	-	226724	227985	0	2	50,50	0,1211
chrII	223747	227985	datPSI:0.78863736	950	-	223747	227985	0	2	50,50	0,4188
chrII	223747	226663	datPSI:0.32775133	950	-	223747	226663	0	2	50,50	0,2866
chrI	286947	287558	datPSI:0.38854527	950	-	286947	287558	0	2	50,50	0,561
chrI	286370	287558	datPSI:0.61145473	950	-	286370	287558	0	2	50,50	0,1138
chrI	286370	286923	datPSI:0.42947559	950	-	286370	286923	0	2	50,50	0,503
chrIII	338006	338345	datPSI:0.27804836	950	-	338006	338345	0	2	50,50	0,289
chrIII	336961	338345	datPSI:0.72195164	950	-	336961	338345	0	2	50,50	0,1334
chrIII	336961	338004	datPSI:0.27514691	950	-	336961	338004	0	2	50,50	0,993
chrIII	345808	346338	datPSI:0.74651296	950	-	345808	346338	0	2	50,50	0,480
chrIII	346059	346338	datPSI:0.25348704	950	-	346059	346338	0	2	50,50	0,229
chrIII	345808	346072	datPSI:0.25000000	950	-	345808	346072	0	2	50,50	0,214
chrIII	409946	410597	datPSI:0.46867056	950	-	409946	410597	0	2	50,50	0,601
chrIII	410356	410597	datPSI:0.53132944	950	-	410356	410597	0	2	50,50	0,191
chrIII	409946	410396	datPSI:0.61730769	950	-	409946	410396	0	2	50,50	0,400
chrX	612334	612757	datPSI:0.33524767	950	-	612334	612757	0	2	50,50	0,373
chrX	611565	612757	datPSI:0.66475233	950	-	611565	612757	0	2	50,50	0,1142
chrX	611565	612404	datPSI:0.25445736	950	-	611565	612404	0	2	50,50	0,789
chrX	720873	722385	datPSI:0.33841912	950	-	720873	722385	0	2	50,50	0,1462
chrX	722228	722385	datPSI:0.66158088	950	-	722228	722385	0	2	50,50	0,107
chrX	720873	722202	datPSI:0.70375738	950	-	720873	722202	0	2	50,50	0,1279
chrIII	729143	729629	datPSI:0.53285287	950	-	729143	729629	0	2	50,50	0,436
chrIII	729408	729629	datPSI:0.46714713	950	-	729408	729629	0	2	50,50	0,171
chrIII	729143	729367	datPSI:0.48683567	950	-	729143	729367	0	2	50,50	0,174
chrIII	780808	781673	datPSI:0.47985348	950	-	780808	781673	0	2	50,50	0,815
chrIII	781005	781673	datPSI:0.52014652	950	-	781005	781673	0	2	50,50	0,618
chrIII	780808	781027	datPSI:0.50876099	950	-	780808	781027	0	2	50,50	0,169
chrII	791242	791514	datPSI:0.68594029	950	-	791242	791514	0	2	50,50	0,222
chrII	791359	791514	datPSI:0.31405971	950	-	791359	791514	0	2	50,50	0,105
chrII	791242	791387	datPSI:0.31132146	950	-	791242	791387	0	2	50,50	0,95
chrIII	882008	883640	datPSI:0.57337056	950	-	882008	883640	0	2	50,50	0,1582
chrIII	882162	883640	datPSI:0.42662944	950	-	882162	883640	0	2	50,50	0,1428
chrIII	882008	882155	datPSI:0.50618168	950	-	882008	882155	0	2	50,50	0,97
chrIV	1007365	1007586	datPSI:0.88785999	950	-	1007365	1007586	0	2	50,50	0,171
chrIV	1006514	1007586	datPSI:0.11214001	950	-	1006514	1007586	0	2	50,50	0,1022
chrIV	1006514	1007343	datPSI:0.90055261	950	-	1006514	1007343	0	2	50,50	0,779
chrIII	1068201	1070472	datPSI:0.15033659	950	-	1068201	1070472	0	2	50,50	0,2221
chrIII	1067902	1070472	datPSI:0.84966341	950	-	1067902	1070472	0	2	50,50	0,2520
chrIII	1067902	1068085	datPSI:0.17244635	950	-	1067902	1068085	0	2	50,50	0,133
chrIII	1217759	1219436	datPSI:0.27585098	950	-	1217759	1219436	0	2	50,50	0,1627
chrIII	1218742	1219436	datPSI:0.72414902	950	-	1218742	1219436	0	2	50,50	0,644
chrIII	1217759	1218766	datPSI:0.68453751	950	-	1217759	1218766	0	2	50,50	0,957
chrIII	1534849	1536518	datPSI:0.14611614	950	+	1534849	1536518	0	2	50,50	0,1619
chrIII	1534849	1535394	datPSI:0.85388386	950	+	1534849	1535394	0	2	50,50	0,495
chrIII	1535466	1536518	datPSI:0.85894076	950	+	1535466	1536518	0	2	50,50	0,1002
chrIV	1551722	1552423	datPSI:0.35338346	950	+	1551722	1552423	0	2	50,50	0,651
chrIV	1551722	1551953	datPSI:0.64661654	950	+	1551722	1551953	0	2	50,50	0,181
chrIV	1552076	1552423	datPSI:0.63072256	950	+	1552076	1552423	0	2	50,50	0,297
chrIV	1568405	1569520	datPSI:0.92514794	950	-	1568405	1569520	0	2	50,50	0,1065
chrIV	1569008	1569520	datPSI:0.07485206	950	-	1569008	1569520	0	2	50,50	0,462
chrIV	1568405	1569087	datPSI:0.08760075	950	-	1568405	1569087	0	2	50,50	0,632
chrIII	1830557	1830715	datPSI:0.19367301	950	+	1830557	1830715	0	2	50,50	0,108
chrIII	1830557	1830836	datPSI:0.80632699	950	+	1830557	1830836	0	2	50,50	0,229
chrIII	1830682	1830836	datPSI:0.21941992	950	+	1830682	1830836	0	2	50,50	0,104
chrIII	1841860	1842919	datPSI:0.61114222	950	+	1841860	1842919	0	2	50,50	0,1009
chrIII	1841860	1844422	datPSI:0.38885778	950	+	1841860	1844422	0	2	50,50	0,2512
chrIII	1843053	1844422	datPSI:0.72117272	950	+	1843053	1844422	0	2	50,50	0,1319
chrIII	2035084	2036056	datPSI:0.38867925	950	-	2035084	2036056	0	2	50,50	0,922
chrIII	2035623	2036056	datPSI:0.61132075	950	-	2035623	2036056	0	2	50,50	0,383
chrIII	2035084	2035705	datPSI:0.49696970	950	-	2035084	2035705	0	2	50,50	0,571
chrX	2285476	2285892	datPSI:0.60806766	950	-	2285476	2285892	0	2	50,50	0,366
chrX	2285601	2285892	datPSI:0.39193234	950	-	2285601	2285892	0	2	50,50	0,241
chrX	2285476	2285619	datPSI:0.31119529	950	-	2285476	2285619	0	2	50,50	0,93
chrIII	2479989	2481947	datPSI:0.58588957	950	+	2479989	2481947	0	2	50,50	0,1908
chrIII	2479989	2480796	datPSI:0.41411043	950	+	2479989	2480796	0	2	50,50	0,757
chrIII	2480762	2481947	datPSI:0.52161765	950	+	2480762	2481947	0	2	50,50	0,1135
chrIV	2712125	2712944	datPSI:0.13134556	950	-	2712125	2712944	0	2	50,50	0,769
chrIV	2712604	2712944	datPSI:0.86865444	950	-	2712604	2712944	0	2	50,50	0,290
chrIV	2712125	2712640	datPSI:0.91962272	950	-	2712125	2712640	0	2	50,50	0,465
chrIII	2749271	2750064	datPSI:0.62474516	950	-	2749271	2750064	0	2	50,50	0,743
chrIII	2749060	2750064	datPSI:0.37525484	950	-	2749060	2750064	0	2	50,50	0,954
chrIII	2749060	2749209	datPSI:0.62912332	950	-	2749060	2749209	0	2	50,50	0,99
chrX	3345081	3345334	datPSI:0.89379252	950	+	3345081	3345334	0	2	50,50	0,203
chrX	3345081	3345442	datPSI:0.10620748	950	+	3345081	3345442	0	2	50,50	0,311
chrX	3345297	3345442	datPSI:0.90989305	950	+	3345297	3345442	0	2	50,50	0,95
chrI	3506190	3507139	datPSI:0.22327593	950	+	3506190	3507139	0	2	50,50	0,899
[truncated: 2,310 more rows]

## Sheet: Serotonergic_AltSplicing
Serotonergic neurons: alternative splicing events
Cassette
[truncated: 1,316 more rows]

## Sheet: Musc._vs_Intest._TissDiffSplic
Muscle vs. Intestine: tissue differential splicing events
[truncated: 226 more rows]

[truncated: 5 more sheets: Neuro._vs_Musc._TissDiffSplic, Neuro._vs_Intest._TissDiffSplic, Neuro._vs_Dopa._TissDiffSplic, Neuro._vs_Sero._TissDiffSplic, Dopa._vs_Sero._TissDiffSplic]
