# Supplementary material for: Global regulatory features of alternative splicing across tissues and within the nervous system of C. elegans
Source: Genome Res. 2020 Dec;30(12):1766–80. doi: 10.1101/gr.267328.120 (PMC7706725; doi:10.1101/gr.267328.120)
Supplement: Supplemental Material [file supp_gr.267328.120_Supplemental_Table_S4.xlsx]

## Sheet: Legend
Supplemental Table S4: Spreadsheet with tissue-regulated alternative splice junction information. Each worksheet is presented in BED format as described for Additional file 2.

## Sheet: neuron_vs_muscle_tissue_dif
track name=neuron_vs_muscle description='neuron_vs_muscle_tissue_differential'
chrV	38219	39040	neuron_readCounts:445;muscle_readCounts:75;neuron_PSI:0.223;muscle_PSI:0.573	950	+	38219	39040	0	2	50,50	0,771
chrV	38219	40503	neuron_readCounts:1554;muscle_readCounts:63;neuron_PSI:0.777;muscle_PSI:0.427	950	+	38219	40503	0	2	50,50	0,2234
chrV	38976	40503	neuron_readCounts:492;muscle_readCounts:80;neuron_PSI:0.241;muscle_PSI:0.588	950	+	38976	40503	0	2	50,50	0,1477
chrII	167028	167223	neuron_readCounts:237;muscle_readCounts:367;neuron_PSI:0.524;muscle_PSI:0.853	950	+	167028	167223	0	2	50,50	0,145
chrII	167028	167953	neuron_readCounts:215;muscle_readCounts:59;neuron_PSI:0.476;muscle_PSI:0.147	950	+	167028	167953	0	2	50,50	0,875
chrII	167336	167953	neuron_readCounts:423;muscle_readCounts:626;neuron_PSI:0.663;muscle_PSI:0.914	950	+	167336	167953	0	2	50,50	0,567
chrV	171306	176728	neuron_readCounts:990;muscle_readCounts:178;neuron_PSI:0.745;muscle_PSI:0.93	950	+	171306	176728	0	2	50,50	0,5372
chrV	171306	172915	neuron_readCounts:293;muscle_readCounts:17;neuron_PSI:0.255;muscle_PSI:0.07	950	+	171306	172915	0	2	50,50	0,1559
chrIV	139446	140592	neuron_readCounts:23;muscle_readCounts:2;neuron_PSI:0.096;muscle_PSI:0.036	950	-	139446	140592	0	2	50,50	0,1096
chrIV	139545	140592	neuron_readCounts:21;muscle_readCounts:2;neuron_PSI:0.1;muscle_PSI:0.036	950	-	139545	140592	0	2	50,50	0,997
chrIV	140250	140592	neuron_readCounts:33;muscle_readCounts:56;neuron_PSI:0.281;muscle_PSI:0.892	950	-	140250	140592	0	2	50,50	0,292
chrIV	140400	140592	neuron_readCounts:92;muscle_readCounts:2;neuron_PSI:0.523;muscle_PSI:0.036	950	-	140400	140592	0	2	50,50	0,142
chrIII	347387	348094	neuron_readCounts:765;muscle_readCounts:5;neuron_PSI:0.833;muscle_PSI:0.045	950	-	347387	348094	0	2	50,50	0,657
chrIII	347859	348094	neuron_readCounts:144;muscle_readCounts:113;neuron_PSI:0.167;muscle_PSI:0.955	950	-	347859	348094	0	2	50,50	0,185
chrIII	347387	347890	neuron_readCounts:145;muscle_readCounts:108;neuron_PSI:0.16;muscle_PSI:0.952	950	-	347387	347890	0	2	50,50	0,453
chrIV	410945	414290	neuron_readCounts:110;muscle_readCounts:77;neuron_PSI:0.395;muscle_PSI:0.689	950	+	410945	414290	0	2	50,50	0,3295
chrIV	413840	414290	neuron_readCounts:187;muscle_readCounts:38;neuron_PSI:0.605;muscle_PSI:0.311	950	+	413840	414290	0	2	50,50	0,400
chrIV	885371	886491	neuron_readCounts:119;muscle_readCounts:11;neuron_PSI:0.536;muscle_PSI:0.06	950	+	885371	886491	0	2	50,50	0,1070
chrIV	885371	886545	neuron_readCounts:90;muscle_readCounts:163;neuron_PSI:0.464;muscle_PSI:0.94	950	+	885371	886545	0	2	50,50	0,1124
chrIII	593545	593976	neuron_readCounts:655;muscle_readCounts:64;neuron_PSI:0.903;muscle_PSI:0.29	950	-	593545	593976	0	2	50,50	0,381
chrIII	592093	593976	neuron_readCounts:63;muscle_readCounts:115;neuron_PSI:0.097;muscle_PSI:0.71	950	-	592093	593976	0	2	50,50	0,1833
chrIII	592093	593420	neuron_readCounts:612;muscle_readCounts:55;neuron_PSI:0.908;muscle_PSI:0.282	950	-	592093	593420	0	2	50,50	0,1277
chrIII	594073	595298	neuron_readCounts:162;muscle_readCounts:126;neuron_PSI:0.461;muscle_PSI:0.982	950	-	594073	595298	0	2	50,50	0,1175
chrIII	594073	596695	neuron_readCounts:190;muscle_readCounts:2;neuron_PSI:0.539;muscle_PSI:0.018	950	-	594073	596695	0	2	50,50	0,2572
chrX	611565	612757	neuron_readCounts:515;muscle_readCounts:3919;neuron_PSI:0.788;muscle_PSI:0.992	950	-	611565	612757	0	2	50,50	0,1142
chrX	612334	612757	neuron_readCounts:151;muscle_readCounts:44;neuron_PSI:0.212;muscle_PSI:0.008	950	-	612334	612757	0	2	50,50	0,373
chrX	611565	612404	neuron_readCounts:144;muscle_readCounts:40;neuron_PSI:0.21;muscle_PSI:0.008	950	-	611565	612404	0	2	50,50	0,789
chrII	650212	650368	neuron_readCounts:126;muscle_readCounts:39;neuron_PSI:0.859;muscle_PSI:0.598	950	-	650212	650368	0	2	50,50	0,106
chrII	650134	650368	neuron_readCounts:21;muscle_readCounts:30;neuron_PSI:0.141;muscle_PSI:0.402	950	-	650134	650368	0	2	50,50	0,184
chrII	650134	650279	neuron_readCounts:130;muscle_readCounts:41;neuron_PSI:0.863;muscle_PSI:0.608	950	-	650134	650279	0	2	50,50	0,95
chrX	722228	722385	neuron_readCounts:906;muscle_readCounts:164;neuron_PSI:0.736;muscle_PSI:0.424	950	-	722228	722385	0	2	50,50	0,107
chrX	720873	722385	neuron_readCounts:335;muscle_readCounts:216;neuron_PSI:0.264;muscle_PSI:0.576	950	-	720873	722385	0	2	50,50	0,1462
chrX	720873	722202	neuron_readCounts:873;muscle_readCounts:130;neuron_PSI:0.734;muscle_PSI:0.365	950	-	720873	722202	0	2	50,50	0,1279
chrIV	749921	750249	neuron_readCounts:285;muscle_readCounts:3;neuron_PSI:0.886;muscle_PSI:0.017	950	+	749921	750249	0	2	50,50	0,278
chrIV	749921	750086	neuron_readCounts:32;muscle_readCounts:167;neuron_PSI:0.114;muscle_PSI:0.983	950	+	749921	750086	0	2	50,50	0,115
chrIV	750010	750249	neuron_readCounts:32;muscle_readCounts:174;neuron_PSI:0.104;muscle_PSI:0.983	950	+	750010	750249	0	2	50,50	0,189
chrIV	751238	751632	neuron_readCounts:645;muscle_readCounts:199;neuron_PSI:0.943;muscle_PSI:0.671	950	+	751238	751632	0	2	50,50	0,344
chrIV	751238	751430	neuron_readCounts:36;muscle_readCounts:114;neuron_PSI:0.057;muscle_PSI:0.329	950	+	751238	751430	0	2	50,50	0,142
chrIV	751384	751632	neuron_readCounts:62;muscle_readCounts:117;neuron_PSI:0.087;muscle_PSI:0.352	950	+	751384	751632	0	2	50,50	0,198
chrIII	1216766	1217663	neuron_readCounts:1118;muscle_readCounts:124;neuron_PSI:0.981;muscle_PSI:0.698	950	-	1216766	1217663	0	2	50,50	0,847
chrIII	1216199	1217663	neuron_readCounts:23;muscle_readCounts:67;neuron_PSI:0.019;muscle_PSI:0.302	950	-	1216199	1217663	0	2	50,50	0,1414
chrI	1051975	1052141	neuron_readCounts:76;muscle_readCounts:37;neuron_PSI:0.056;muscle_PSI:0.639	950	-	1051975	1052141	0	2	50,50	0,116
chrI	1051975	1052618	neuron_readCounts:2044;muscle_readCounts:19;neuron_PSI:0.944;muscle_PSI:0.361	950	-	1051975	1052618	0	2	50,50	0,593
chrV	1226833	1227007	neuron_readCounts:637;muscle_readCounts:7;neuron_PSI:0.651;muscle_PSI:0.009	950	-	1226833	1227007	0	2	50,50	0,124
chrV	1226057	1227007	neuron_readCounts:280;muscle_readCounts:773;neuron_PSI:0.288;muscle_PSI:0.986	950	-	1226057	1227007	0	2	50,50	0,900
chrV	1226830	1227007	neuron_readCounts:56;muscle_readCounts:4;neuron_PSI:0.06;muscle_PSI:0.005	950	-	1226830	1227007	0	2	50,50	0,127
chrV	1226057	1226891	neuron_readCounts:859;muscle_readCounts:5;neuron_PSI:0.752;muscle_PSI:0.007	950	-	1226057	1226891	0	2	50,50	0,784
chrII	1236339	1237873	neuron_readCounts:262;muscle_readCounts:744;neuron_PSI:0.326;muscle_PSI:0.868	950	-	1236339	1237873	0	2	50,50	0,1484
chrII	1236339	1236496	neuron_readCounts:80;muscle_readCounts:25;neuron_PSI:0.141;muscle_PSI:0.045	950	-	1236339	1236496	0	2	50,50	0,107
chrII	1236339	1239998	neuron_readCounts:554;muscle_readCounts:132;neuron_PSI:0.533;muscle_PSI:0.086	950	-	1236339	1239998	0	2	50,50	0,3609
chrI	2203814	2205262	neuron_readCounts:108;muscle_readCounts:234;neuron_PSI:0.24;muscle_PSI:0.765	950	+	2203814	2205262	0	2	50,50	0,1398
chrI	2203814	2204974	neuron_readCounts:350;muscle_readCounts:66;neuron_PSI:0.76;muscle_PSI:0.235	950	+	2203814	2204974	0	2	50,50	0,1110
chrV	1475091	1475361	neuron_readCounts:6973;muscle_readCounts:1155;neuron_PSI:0.751;muscle_PSI:0.034	950	+	1475091	1475361	0	2	50,50	0,220
chrV	1475091	1476931	neuron_readCounts:2395;muscle_readCounts:40497;neuron_PSI:0.249;muscle_PSI:0.966	950	+	1475091	1476931	0	2	50,50	0,1790
chrX	2477566	2478503	neuron_readCounts:32;muscle_readCounts:6;neuron_PSI:0.035;muscle_PSI:0.086	950	-	2477566	2478503	0	2	50,50	0,887
chrX	2477392	2478503	neuron_readCounts:463;muscle_readCounts:13;neuron_PSI:0.656;muscle_PSI:0.115	950	-	2477392	2478503	0	2	50,50	0,1061
chrX	2477326	2478503	neuron_readCounts:257;muscle_readCounts:62;neuron_PSI:0.305;muscle_PSI:0.732	950	-	2477326	2478503	0	2	50,50	0,1127
chrX	2477312	2478503	neuron_readCounts:2;muscle_readCounts:7;neuron_PSI:0.005;muscle_PSI:0.068	950	-	2477312	2478503	0	2	50,50	0,1141
chrX	2509811	2509976	neuron_readCounts:123;muscle_readCounts:66;neuron_PSI:0.086;muscle_PSI:0.657	950	-	2509811	2509976	0	2	50,50	0,115
chrX	2509811	2510026	neuron_readCounts:29;muscle_readCounts:11;neuron_PSI:0.032;muscle_PSI:0.132	950	-	2509811	2510026	0	2	50,50	0,165
chrX	2509820	2510026	neuron_readCounts:10;muscle_readCounts:8;neuron_PSI:0.008;muscle_PSI:0.067	950	-	2509820	2510026	0	2	50,50	0,156
chrX	2509820	2509976	neuron_readCounts:1459;muscle_readCounts:15;neuron_PSI:0.874;muscle_PSI:0.143	950	-	2509820	2509976	0	2	50,50	0,106
chrIV	2875333	2879311	neuron_readCounts:1291;muscle_readCounts:275;neuron_PSI:0.781;muscle_PSI:0.981	950	-	2875333	2879311	0	2	50,50	0,3928
chrIV	2875291	2879311	neuron_readCounts:364;muscle_readCounts:4;neuron_PSI:0.219;muscle_PSI:0.019	950	-	2875291	2879311	0	2	50,50	0,3970
chrIII	1932324	1934233	neuron_readCounts:103;muscle_readCounts:40;neuron_PSI:0.184;muscle_PSI:0.528	950	+	1932324	1934233	0	2	50,50	0,1859
chrIII	1933252	1934233	neuron_readCounts:454;muscle_readCounts:37;neuron_PSI:0.816;muscle_PSI:0.472	950	+	1933252	1934233	0	2	50,50	0,931
chrX	3712604	3712855	neuron_readCounts:50;muscle_readCounts:148;neuron_PSI:0.035;muscle_PSI:0.892	950	+	3712604	3712855	0	2	50,50	0,201
chrX	3712339	3712855	neuron_readCounts:1348;muscle_readCounts:14;neuron_PSI:0.965;muscle_PSI:0.108	950	+	3712339	3712855	0	2	50,50	0,466
chrI	3733653	3734389	neuron_readCounts:911;muscle_readCounts:644;neuron_PSI:0.398;muscle_PSI:0.974	950	-	3733653	3734389	0	2	50,50	0,686
chrI	3733653	3734482	neuron_readCounts:1374;muscle_readCounts:18;neuron_PSI:0.602;muscle_PSI:0.026	950	-	3733653	3734482	0	2	50,50	0,779
chrI	2614439	2614846	neuron_readCounts:990;muscle_readCounts:3;neuron_PSI:0.275;muscle_PSI:0.005	950	+	2614439	2614846	0	2	50,50	0,357
chrI	2614439	2615126	neuron_readCounts:2635;muscle_readCounts:732;neuron_PSI:0.725;muscle_PSI:0.995	950	+	2614439	2615126	0	2	50,50	0,637
chrI	2614769	2615126	neuron_readCounts:931;muscle_readCounts:3;neuron_PSI:0.264;muscle_PSI:0.005	950	+	2614769	2615126	0	2	50,50	0,307
chrIII	3990785	3992135	neuron_readCounts:1334;muscle_readCounts:79;neuron_PSI:0.829;muscle_PSI:0.232	950	-	3990785	3992135	0	2	50,50	0,1300
chrIII	3990776	3992135	neuron_readCounts:274;muscle_readCounts:272;neuron_PSI:0.171;muscle_PSI:0.768	950	-	3990776	3992135	0	2	50,50	0,1309
chrIII	2749271	2750064	neuron_readCounts:70;muscle_readCounts:610;neuron_PSI:0.583;muscle_PSI:0.96	950	-	2749271	2750064	0	2	50,50	0,743
chrIII	2749060	2750064	neuron_readCounts:54;muscle_readCounts:27;neuron_PSI:0.417;muscle_PSI:0.04	950	-	2749060	2750064	0	2	50,50	0,954
chrIII	2749060	2749209	neuron_readCounts:107;muscle_readCounts:724;neuron_PSI:0.676;muscle_PSI:0.966	950	-	2749060	2749209	0	2	50,50	0,99
chrX	4342233	4342381	neuron_readCounts:340;muscle_readCounts:48;neuron_PSI:0.884;muscle_PSI:0.636	950	+	4342233	4342381	0	2	50,50	0,98
chrX	4342233	4342375	neuron_readCounts:39;muscle_readCounts:28;neuron_PSI:0.116;muscle_PSI:0.364	950	+	4342233	4342375	0	2	50,50	0,92
chrIII	3062835	3064010	neuron_readCounts:794;muscle_readCounts:12;neuron_PSI:0.91;muscle_PSI:0.118	950	-	3062835	3064010	0	2	50,50	0,1125
chrIII	3063059	3064010	neuron_readCounts:85;muscle_readCounts:91;neuron_PSI:0.09;muscle_PSI:0.882	950	-	3063059	3064010	0	2	50,50	0,901
chrIII	3062835	3063057	neuron_readCounts:60;muscle_readCounts:80;neuron_PSI:0.088;muscle_PSI:0.87	950	-	3062835	3063057	0	2	50,50	0,172
chrIV	4613213	4617279	neuron_readCounts:825;muscle_readCounts:146;neuron_PSI:0.573;muscle_PSI:0.965	950	-	4613213	4617279	0	2	50,50	0,4016
chrIV	4613213	4613443	neuron_readCounts:620;muscle_readCounts:6;neuron_PSI:0.427;muscle_PSI:0.035	950	-	4613213	4613443	0	2	50,50	0,180
chrX	3172536	3173119	neuron_readCounts:1504;muscle_readCounts:40;neuron_PSI:0.321;muscle_PSI:0.087	950	-	3172536	3173119	0	2	50,50	0,533
chrX	3172140	3173119	neuron_readCounts:3271;muscle_readCounts:418;neuron_PSI:0.679;muscle_PSI:0.913	950	-	3172140	3173119	0	2	50,50	0,929
chrX	3172140	3172591	neuron_readCounts:1541;muscle_readCounts:41;neuron_PSI:0.323;muscle_PSI:0.078	950	-	3172140	3172591	0	2	50,50	0,401
chrIV	3240399	3243504	neuron_readCounts:430;muscle_readCounts:38;neuron_PSI:0.77;muscle_PSI:0.257	950	+	3240399	3243504	0	2	50,50	0,3055
chrIV	3240399	3241606	neuron_readCounts:132;muscle_readCounts:130;neuron_PSI:0.23;muscle_PSI:0.743	950	+	3240399	3241606	0	2	50,50	0,1157
chrIV	3241566	3243504	neuron_readCounts:129;muscle_readCounts:121;neuron_PSI:0.231;muscle_PSI:0.749	950	+	3241566	3243504	0	2	50,50	0,1888
chrI	3421191	3422333	neuron_readCounts:979;muscle_readCounts:187;neuron_PSI:0.622;muscle_PSI:0.029	950	+	3421191	3422333	0	2	50,50	0,1092
chrI	3421191	3423929	neuron_readCounts:601;muscle_readCounts:9987;neuron_PSI:0.378;muscle_PSI:0.971	950	+	3421191	3423929	0	2	50,50	0,2688
chrI	3506190	3508271	neuron_readCounts:932;muscle_readCounts:91;neuron_PSI:0.55;muscle_PSI:0.818	950	+	3506190	3508271	0	2	50,50	0,2031
chrI	3506190	3507139	neuron_readCounts:865;muscle_readCounts:17;neuron_PSI:0.45;muscle_PSI:0.182	950	+	3506190	3507139	0	2	50,50	0,899
chrI	3507114	3508271	neuron_readCounts:763;muscle_readCounts:17;neuron_PSI:0.382;muscle_PSI:0.172	950	+	3507114	3508271	0	2	50,50	0,1107
chrX	3539292	3539945	neuron_readCounts:1408;muscle_readCounts:20;neuron_PSI:0.559;muscle_PSI:0.001	950	+	3539292	3539945	0	2	50,50	0,603
chrX	3539292	3540552	neuron_readCounts:927;muscle_readCounts:15797;neuron_PSI:0.441;muscle_PSI:0.999	950	+	3539292	3540552	0	2	50,50	0,1210
chrX	3539902	3540552	neuron_readCounts:2033;muscle_readCounts:36;neuron_PSI:0.633;muscle_PSI:0.002	950	+	3539902	3540552	0	2	50,50	0,600
chrI	5364070	5364720	neuron_readCounts:3351;muscle_readCounts:117;neuron_PSI:0.432;muscle_PSI:0.247	950	+	5364070	5364720	0	2	50,50	0,600
chrI	5364158	5364720	neuron_readCounts:4261;muscle_readCounts:395;neuron_PSI:0.568;muscle_PSI:0.753	950	+	5364158	5364720	0	2	50,50	0,512
chrIV	3579650	3580227	neuron_readCounts:4;muscle_readCounts:10;neuron_PSI:0.01;muscle_PSI:0.09	950	+	3579650	3580227	0	2	50,50	0,527
chrIV	3580063	3580227	neuron_readCounts:378;muscle_readCounts:33;neuron_PSI:0.659;muscle_PSI:0.275	950	+	3580063	3580227	0	2	50,50	0,114
chrIV	3579650	3580790	neuron_readCounts:203;muscle_readCounts:75;neuron_PSI:0.33;muscle_PSI:0.635	950	+	3579650	3580790	0	2	50,50	0,1090
chrIV	3580348	3580790	neuron_readCounts:494;muscle_readCounts:46;neuron_PSI:0.707;muscle_PSI:0.34	950	+	3580348	3580790	0	2	50,50	0,392
chrI	5430655	5430810	neuron_readCounts:596;muscle_readCounts:123;neuron_PSI:0.139;muscle_PSI:0.422	950	+	5430655	5430810	0	2	50,50	0,105
chrI	5430655	5430822	neuron_readCounts:4891;muscle_readCounts:159;neuron_PSI:0.861;muscle_PSI:0.578	950	+	5430655	5430822	0	2	50,50	0,117
chrI	3667275	3667884	neuron_readCounts:278;muscle_readCounts:107;neuron_PSI:0.553;muscle_PSI:0.933	950	-	3667275	3667884	0	2	50,50	0,559
chrI	3667729	3667884	neuron_readCounts:231;muscle_readCounts:8;neuron_PSI:0.447;muscle_PSI:0.067	950	-	3667729	3667884	0	2	50,50	0,105
chrI	3667275	3667745	neuron_readCounts:108;muscle_readCounts:12;neuron_PSI:0.189;muscle_PSI:0.087	950	-	3667275	3667745	0	2	50,50	0,420
chrI	3667275	3667775	neuron_readCounts:245;muscle_readCounts:15;neuron_PSI:0.351;muscle_PSI:0.111	950	-	3667275	3667775	0	2	50,50	0,450
chrV	3710068	3710747	neuron_readCounts:72;muscle_readCounts:194;neuron_PSI:0.024;muscle_PSI:0.649	950	+	3710068	3710747	0	2	50,50	0,629
chrV	3710068	3712402	neuron_readCounts:3311;muscle_readCounts:144;neuron_PSI:0.976;muscle_PSI:0.351	950	+	3710068	3712402	0	2	50,50	0,2284
chrV	3710958	3712402	neuron_readCounts:147;muscle_readCounts:357;neuron_PSI:0.041;muscle_PSI:0.763	950	+	3710958	3712402	0	2	50,50	0,1394
chrX	5587748	5590526	neuron_readCounts:412;muscle_readCounts:2;neuron_PSI:0.316;muscle_PSI:0.024	950	+	5587748	5590526	0	2	50,50	0,2728
chrX	5590277	5590526	neuron_readCounts:690;muscle_readCounts:166;neuron_PSI:0.684;muscle_PSI:0.976	950	+	5590277	5590526	0	2	50,50	0,199
chrIII	5625232	5625469	neuron_readCounts:36;muscle_readCounts:2;neuron_PSI:0.311;muscle_PSI:0.034	950	+	5625232	5625469	0	2	50,50	0,187
chrIII	5625232	5625412	neuron_readCounts:80;muscle_readCounts:72;neuron_PSI:0.689;muscle_PSI:0.966	950	+	5625232	5625412	0	2	50,50	0,130
chrI	3800920	3801884	neuron_readCounts:904;muscle_readCounts:6;neuron_PSI:0.9;muscle_PSI:0.08	950	-	3800920	3801884	0	2	50,50	0,914
chrI	3800229	3801884	neuron_readCounts:103;muscle_readCounts:77;neuron_PSI:0.1;muscle_PSI:0.92	950	-	3800229	3801884	0	2	50,50	0,1605
chrX	3800641	3801414	neuron_readCounts:9461;muscle_readCounts:124;neuron_PSI:0.852;muscle_PSI:0.273	950	-	3800641	3801414	0	2	50,50	0,723
chrX	3801184	3801414	neuron_readCounts:1827;muscle_readCounts:394;neuron_PSI:0.148;muscle_PSI:0.727	950	-	3801184	3801414	0	2	50,50	0,180
chrX	3801557	3801914	neuron_readCounts:101;muscle_readCounts:232;neuron_PSI:0.02;muscle_PSI:0.751	950	-	3801557	3801914	0	2	50,50	0,307
chrX	3801736	3801914	neuron_readCounts:4935;muscle_readCounts:78;neuron_PSI:0.98;muscle_PSI:0.249	950	-	3801736	3801914	0	2	50,50	0,128
chrX	3801557	3801797	neuron_readCounts:5129;muscle_readCounts:77;neuron_PSI:0.981;muscle_PSI:0.241	950	-	3801557	3801797	0	2	50,50	0,190
chrIII	3846294	3847048	neuron_readCounts:118;muscle_readCounts:4;neuron_PSI:0.338;muscle_PSI:0.035	950	+	3846294	3847048	0	2	50,50	0,704
chrIII	3846294	3846548	neuron_readCounts:230;muscle_readCounts:109;neuron_PSI:0.662;muscle_PSI:0.965	950	+	3846294	3846548	0	2	50,50	0,204
chrV	5774232	5774649	neuron_readCounts:630;muscle_readCounts:312;neuron_PSI:0.698;muscle_PSI:0.896	950	-	5774232	5774649	0	2	50,50	0,367
chrV	5774232	5774601	neuron_readCounts:273;muscle_readCounts:34;neuron_PSI:0.302;muscle_PSI:0.104	950	-	5774232	5774601	0	2	50,50	0,319
chrIV	3896008	3897066	neuron_readCounts:302;muscle_readCounts:223;neuron_PSI:0.894;muscle_PSI:0.663	950	+	3896008	3897066	0	2	50,50	0,1008
chrIV	3896528	3897066	neuron_readCounts:37;muscle_readCounts:125;neuron_PSI:0.106;muscle_PSI:0.337	950	+	3896528	3897066	0	2	50,50	0,488
chrIII	3967074	3967284	neuron_readCounts:241;muscle_readCounts:3;neuron_PSI:0.206;muscle_PSI:0.013	950	-	3967074	3967284	0	2	50,50	0,160
chrIII	3967074	3971541	neuron_readCounts:247;muscle_readCounts:22;neuron_PSI:0.2;muscle_PSI:0.095	950	-	3967074	3971541	0	2	50,50	0,4417
chrIII	3967074	3971658	neuron_readCounts:741;muscle_readCounts:206;neuron_PSI:0.594;muscle_PSI:0.893	950	-	3967074	3971658	0	2	50,50	0,4534
chrIII	5971730	5972632	neuron_readCounts:201;muscle_readCounts:142;neuron_PSI:0.054;muscle_PSI:0.005	950	-	5971730	5972632	0	2	50,50	0,852
chrIII	5971730	5972558	neuron_readCounts:1465;muscle_readCounts:25405;neuron_PSI:0.473;muscle_PSI:0.916	950	-	5971730	5972558	0	2	50,50	0,778
chrIII	5971730	5972611	neuron_readCounts:1631;muscle_readCounts:2275;neuron_PSI:0.473;muscle_PSI:0.079	950	-	5971730	5972611	0	2	50,50	0,831
chrIV	4018111	4018306	neuron_readCounts:617;muscle_readCounts:65;neuron_PSI:0.93;muscle_PSI:0.728	950	-	4018111	4018306	0	2	50,50	0,145
chrIV	4018111	4018536	neuron_readCounts:52;muscle_readCounts:24;neuron_PSI:0.07;muscle_PSI:0.272	950	-	4018111	4018536	0	2	50,50	0,375
chrIV	4027013	4034807	neuron_readCounts:227;muscle_readCounts:2;neuron_PSI:0.839;muscle_PSI:0.031	950	-	4027013	4034807	0	2	50,50	0,7744
chrIV	4027013	4027956	neuron_readCounts:44;muscle_readCounts:63;neuron_PSI:0.161;muscle_PSI:0.969	950	-	4027013	4027956	0	2	50,50	0,893
chrIII	6057989	6058139	neuron_readCounts:137;muscle_readCounts:2;neuron_PSI:0.26;muscle_PSI:0.03	950	+	6057989	6058139	0	2	50,50	0,100
chrIII	6057381	6058139	neuron_readCounts:490;muscle_readCounts:84;neuron_PSI:0.74;muscle_PSI:0.97	950	+	6057381	6058139	0	2	50,50	0,708
chrIII	4143135	4143991	neuron_readCounts:851;muscle_readCounts:16;neuron_PSI:0.666;muscle_PSI:0.296	950	+	4143135	4143991	0	2	50,50	0,806
chrIII	4143135	4144628	neuron_readCounts:434;muscle_readCounts:38;neuron_PSI:0.334;muscle_PSI:0.704	950	+	4143135	4144628	0	2	50,50	0,1443
chrIII	6221030	6223772	neuron_readCounts:6142;muscle_readCounts:28;neuron_PSI:0.902;muscle_PSI:0.59	950	+	6221030	6223772	0	2	50,50	0,2692
chrIII	6221021	6223772	neuron_readCounts:640;muscle_readCounts:20;neuron_PSI:0.098;muscle_PSI:0.41	950	+	6221021	6223772	0	2	50,50	0,2701
chrII	4188916	4204880	neuron_readCounts:37;muscle_readCounts:74;neuron_PSI:0.152;muscle_PSI:0.944	950	+	4188916	4204880	0	2	50,50	0,15914
chrII	4188916	4192057	neuron_readCounts:580;muscle_readCounts:4;neuron_PSI:0.848;muscle_PSI:0.056	950	+	4188916	4192057	0	2	50,50	0,3091
chrV	4206693	4209034	neuron_readCounts:282;muscle_readCounts:288;neuron_PSI:0.512;muscle_PSI:0.766	950	+	4206693	4209034	0	2	50,50	0,2291
chrV	4206693	4208213	neuron_readCounts:261;muscle_readCounts:87;neuron_PSI:0.488;muscle_PSI:0.234	950	+	4206693	4208213	0	2	50,50	0,1470
chrX	4390039	4390881	neuron_readCounts:762;muscle_readCounts:8;neuron_PSI:0.834;muscle_PSI:0.074	950	+	4390039	4390881	0	2	50,50	0,792
chrX	4390039	4391088	neuron_readCounts:150;muscle_readCounts:110;neuron_PSI:0.166;muscle_PSI:0.926	950	+	4390039	4391088	0	2	50,50	0,999
chrX	4390799	4391088	neuron_readCounts:796;muscle_readCounts:8;neuron_PSI:0.842;muscle_PSI:0.074	950	+	4390799	4391088	0	2	50,50	0,239
chrIV	4451615	4457708	neuron_readCounts:40;muscle_readCounts:9;neuron_PSI:0.509;muscle_PSI:0.137	950	+	4451615	4457708	0	2	50,50	0,6043
chrIV	4454698	4457708	neuron_readCounts:43;muscle_readCounts:70;neuron_PSI:0.491;muscle_PSI:0.863	950	+	4454698	4457708	0	2	50,50	0,2960
chrII	4469224	4469501	neuron_readCounts:92;muscle_readCounts:18;neuron_PSI:0.645;muscle_PSI:0.342	950	+	4469224	4469501	0	2	50,50	0,227
chrII	4468433	4469501	neuron_readCounts:51;muscle_readCounts:35;neuron_PSI:0.355;muscle_PSI:0.658	950	+	4468433	4469501	0	2	50,50	0,1018
chrII	4492070	4492254	neuron_readCounts:2558;muscle_readCounts:21;neuron_PSI:0.852;muscle_PSI:0.018	950	-	4492070	4492254	0	2	50,50	0,134
chrII	4491729	4492254	neuron_readCounts:405;muscle_readCounts:1214;neuron_PSI:0.148;muscle_PSI:0.982	950	-	4491729	4492254	0	2	50,50	0,475
chrII	4491729	4492136	neuron_readCounts:2714;muscle_readCounts:28;neuron_PSI:0.858;muscle_PSI:0.02	950	-	4491729	4492136	0	2	50,50	0,357
chrII	4492775	4500147	neuron_readCounts:1459;muscle_readCounts:111;neuron_PSI:0.94;muscle_PSI:0.247	950	-	4492775	4500147	0	2	50,50	0,7322
chrII	4492775	4493357	neuron_readCounts:91;muscle_readCounts:335;neuron_PSI:0.06;muscle_PSI:0.753	950	-	4492775	4493357	0	2	50,50	0,532
chrX	4519403	4519570	neuron_readCounts:415;muscle_readCounts:110;neuron_PSI:0.15;muscle_PSI:0.825	950	-	4519403	4519570	0	2	50,50	0,117
chrX	4518635	4519570	neuron_readCounts:2362;muscle_readCounts:27;neuron_PSI:0.85;muscle_PSI:0.175	950	-	4518635	4519570	0	2	50,50	0,885
chrX	4518635	4519401	neuron_readCounts:456;muscle_readCounts:145;neuron_PSI:0.164;muscle_PSI:0.85	950	-	4518635	4519401	0	2	50,50	0,716
chrI	3422383	3423929	neuron_readCounts:468;muscle_readCounts:44;neuron_PSI:0.263;muscle_PSI:0.016	950	+	3422383	3423929	0	2	50,50	0,1496
chrI	3423305	3423929	neuron_readCounts:693;muscle_readCounts:176;neuron_PSI:0.37;muscle_PSI:0.021	950	+	3423305	3423929	0	2	50,50	0,574
chrII	7101017	7101160	neuron_readCounts:354;muscle_readCounts:205;neuron_PSI:0.738;muscle_PSI:0.945	950	-	7101017	7101160	0	2	50,50	0,93
chrII	7101017	7101164	neuron_readCounts:120;muscle_readCounts:14;neuron_PSI:0.262;muscle_PSI:0.055	950	-	7101017	7101164	0	2	50,50	0,97
chrV	4804389	4805488	neuron_readCounts:112;muscle_readCounts:8;neuron_PSI:0.402;muscle_PSI:0.144	950	-	4804389	4805488	0	2	50,50	0,1049
chrV	4805166	4805488	neuron_readCounts:174;muscle_readCounts:48;neuron_PSI:0.598;muscle_PSI:0.856	950	-	4805166	4805488	0	2	50,50	0,272
chrII	4952481	4952889	neuron_readCounts:252;muscle_readCounts:69;neuron_PSI:0.448;muscle_PSI:0.788	950	+	4952481	4952889	0	2	50,50	0,358
chrII	4952481	4953210	neuron_readCounts:151;muscle_readCounts:13;neuron_PSI:0.262;muscle_PSI:0.152	950	+	4952481	4953210	0	2	50,50	0,679
chrII	4952481	4952696	neuron_readCounts:162;muscle_readCounts:6;neuron_PSI:0.291;muscle_PSI:0.06	950	+	4952481	4952696	0	2	50,50	0,165
chrIII	5010939	5011522	neuron_readCounts:553;muscle_readCounts:59;neuron_PSI:0.664;muscle_PSI:0.328	950	-	5010939	5011522	0	2	50,50	0,533
chrIII	5011266	5011522	neuron_readCounts:282;muscle_readCounts:105;neuron_PSI:0.336;muscle_PSI:0.672	950	-	5011266	5011522	0	2	50,50	0,206
chrIII	5010939	5011189	neuron_readCounts:379;muscle_readCounts:144;neuron_PSI:0.398;muscle_PSI:0.746	950	-	5010939	5011189	0	2	50,50	0,200
chrI	3800229	3803060	neuron_readCounts:150;muscle_readCounts:19;neuron_PSI:0.08;muscle_PSI:0.136	950	-	3800229	3803060	0	2	50,50	0,2781
chrI	3800229	3800858	neuron_readCounts:1677;muscle_readCounts:37;neuron_PSI:0.869;muscle_PSI:0.29	950	-	3800229	3800858	0	2	50,50	0,579
chrV	5111901	5113057	neuron_readCounts:2;muscle_readCounts:84;neuron_PSI:0.002;muscle_PSI:0.976	950	-	5111901	5113057	0	2	50,50	0,1106
chrV	5112577	5113057	neuron_readCounts:1084;muscle_readCounts:2;neuron_PSI:0.998;muscle_PSI:0.024	950	-	5112577	5113057	0	2	50,50	0,430
chrV	5111901	5112589	neuron_readCounts:989;muscle_readCounts:2;neuron_PSI:0.998;muscle_PSI:0.024	950	-	5111901	5112589	0	2	50,50	0,638
chrII	7669327	7669895	neuron_readCounts:281;muscle_readCounts:86;neuron_PSI:0.631;muscle_PSI:0.886	950	+	7669327	7669895	0	2	50,50	0,518
chrII	7669753	7669895	neuron_readCounts:168;muscle_readCounts:11;neuron_PSI:0.369;muscle_PSI:0.114	950	+	7669753	7669895	0	2	50,50	0,92
chrIV	5132186	5144764	neuron_readCounts:101;muscle_readCounts:5;neuron_PSI:0.328;muscle_PSI:0.044	950	-	5132186	5144764	0	2	50,50	0,12528
chrIV	5132186	5133637	neuron_readCounts:204;muscle_readCounts:113;neuron_PSI:0.672;muscle_PSI:0.956	950	-	5132186	5133637	0	2	50,50	0,1401
chrI	5290468	5290667	neuron_readCounts:97;muscle_readCounts:22;neuron_PSI:0.543;muscle_PSI:0.208	950	-	5290468	5290667	0	2	50,50	0,149
chrI	5290468	5291543	neuron_readCounts:72;muscle_readCounts:77;neuron_PSI:0.457;muscle_PSI:0.792	950	-	5290468	5291543	0	2	50,50	0,1025
chrIV	5357759	5357925	neuron_readCounts:935;muscle_readCounts:170;neuron_PSI:0.712;muscle_PSI:0.441	950	-	5357759	5357925	0	2	50,50	0,116
chrIV	5357372	5357925	neuron_readCounts:353;muscle_readCounts:169;neuron_PSI:0.288;muscle_PSI:0.559	950	-	5357372	5357925	0	2	50,50	0,503
chrI	4016921	4021278	neuron_readCounts:197;muscle_readCounts:45;neuron_PSI:0.702;muscle_PSI:0.411	950	-	4016921	4021278	0	2	50,50	0,4307
chrI	4016921	4017373	neuron_readCounts:71;muscle_readCounts:8;neuron_PSI:0.251;muscle_PSI:0.072	950	-	4016921	4017373	0	2	50,50	0,402
chrI	4016921	4020308	neuron_readCounts:14;muscle_readCounts:57;neuron_PSI:0.047;muscle_PSI:0.517	950	-	4016921	4020308	0	2	50,50	0,3337
chrI	5360747	5362117	neuron_readCounts:1432;muscle_readCounts:21;neuron_PSI:0.606;muscle_PSI:0.1	950	+	5360747	5362117	0	2	50,50	0,1320
chrI	5360747	5363065	neuron_readCounts:927;muscle_readCounts:186;neuron_PSI:0.394;muscle_PSI:0.9	950	+	5360747	5363065	0	2	50,50	0,2268
chrI	5362068	5363065	neuron_readCounts:1441;muscle_readCounts:23;neuron_PSI:0.61;muscle_PSI:0.097	950	+	5362068	5363065	0	2	50,50	0,947
chrI	5376291	5377352	neuron_readCounts:319;muscle_readCounts:12;neuron_PSI:0.689;muscle_PSI:0.149	950	-	5376291	5377352	0	2	50,50	0,1011
chrI	5376291	5384471	neuron_readCounts:140;muscle_readCounts:70;neuron_PSI:0.311;muscle_PSI:0.851	950	-	5376291	5384471	0	2	50,50	0,8130
chrIV	8085228	8085802	neuron_readCounts:933;muscle_readCounts:20;neuron_PSI:0.841;muscle_PSI:0.262	950	-	8085228	8085802	0	2	50,50	0,524
chrIV	8085183	8085802	neuron_readCounts:177;muscle_readCounts:57;neuron_PSI:0.159;muscle_PSI:0.738	950	-	8085183	8085802	0	2	50,50	0,569
chrI	8112323	8113768	neuron_readCounts:270;muscle_readCounts:6;neuron_PSI:0.309;muscle_PSI:0.043	950	-	8112323	8113768	0	2	50,50	0,1395
chrI	8112344	8113768	neuron_readCounts:589;muscle_readCounts:127;neuron_PSI:0.691;muscle_PSI:0.957	950	-	8112344	8113768	0	2	50,50	0,1374
chrI	5560025	5560359	neuron_readCounts:3569;muscle_readCounts:83;neuron_PSI:0.984;muscle_PSI:0.756	950	+	5560025	5560359	0	2	50,50	0,284
chrI	5560166	5560359	neuron_readCounts:50;muscle_readCounts:27;neuron_PSI:0.016;muscle_PSI:0.244	950	+	5560166	5560359	0	2	50,50	0,143
chrI	5569518	5569754	neuron_readCounts:443;muscle_readCounts:1727;neuron_PSI:0.171;muscle_PSI:0.816	950	-	5569518	5569754	0	2	50,50	0,186
chrI	5569149	5569754	neuron_readCounts:2622;muscle_readCounts:404;neuron_PSI:0.829;muscle_PSI:0.184	950	-	5569149	5569754	0	2	50,50	0,555
chrI	5569149	5569594	neuron_readCounts:388;muscle_readCounts:1577;neuron_PSI:0.15;muscle_PSI:0.802	950	-	5569149	5569594	0	2	50,50	0,395
chrV	5577211	5577937	neuron_readCounts:2233;muscle_readCounts:548;neuron_PSI:0.217;muscle_PSI:0.84	950	-	5577211	5577937	0	2	50,50	0,676
chrV	5576644	5577937	neuron_readCounts:9782;muscle_readCounts:121;neuron_PSI:0.783;muscle_PSI:0.16	950	-	5576644	5577937	0	2	50,50	0,1243
chrI	5587878	5591600	neuron_readCounts:594;muscle_readCounts:502;neuron_PSI:0.909;muscle_PSI:0.448	950	-	5587878	5591600	0	2	50,50	0,3672
chrI	5590578	5591600	neuron_readCounts:59;muscle_readCounts:659;neuron_PSI:0.091;muscle_PSI:0.552	950	-	5590578	5591600	0	2	50,50	0,972
chrII	5590561	5590842	neuron_readCounts:530;muscle_readCounts:457;neuron_PSI:0.281;muscle_PSI:0.565	950	-	5590561	5590842	0	2	50,50	0,231
chrII	5589877	5590842	neuron_readCounts:1257;muscle_readCounts:296;neuron_PSI:0.719;muscle_PSI:0.435	950	-	5589877	5590842	0	2	50,50	0,915
chrV	5607317	5607785	neuron_readCounts:733;muscle_readCounts:196;neuron_PSI:0.716;muscle_PSI:0.989	950	+	5607317	5607785	0	2	50,50	0,418
chrV	5607625	5607785	neuron_readCounts:269;muscle_readCounts:2;neuron_PSI:0.284;muscle_PSI:0.011	950	+	5607625	5607785	0	2	50,50	0,110
chrI	5634185	5634452	neuron_readCounts:1059;muscle_readCounts:76;neuron_PSI:0.986;muscle_PSI:0.489	950	+	5634185	5634452	0	2	50,50	0,217
chrI	5634185	5635691	neuron_readCounts:15;muscle_readCounts:73;neuron_PSI:0.014;muscle_PSI:0.511	950	+	5634185	5635691	0	2	50,50	0,1456
chrI	5635349	5636766	neuron_readCounts:634;muscle_readCounts:72;neuron_PSI:0.384;muscle_PSI:0.941	950	+	5635349	5636766	0	2	50,50	0,1367
chrI	5635349	5635691	neuron_readCounts:1015;muscle_readCounts:3;neuron_PSI:0.616;muscle_PSI:0.059	950	+	5635349	5635691	0	2	50,50	0,292
chrIII	5890627	5891294	neuron_readCounts:561;muscle_readCounts:27;neuron_PSI:0.735;muscle_PSI:0.222	950	-	5890627	5891294	0	2	50,50	0,617
chrIII	5894080	5895295	neuron_readCounts:177;muscle_readCounts:29;neuron_PSI:0.581;muscle_PSI:0.013	950	-	5894080	5895295	0	2	50,50	0,1165
chrIII	5894080	5895599	neuron_readCounts:124;muscle_readCounts:2129;neuron_PSI:0.474;muscle_PSI:0.991	950	-	5894080	5895599	0	2	50,50	0,1469
chrIII	5895424	5895599	neuron_readCounts:136;muscle_readCounts:20;neuron_PSI:0.526;muscle_PSI:0.009	950	-	5895424	5895599	0	2	50,50	0,125
chrIII	5895629	5896010	neuron_readCounts:105;muscle_readCounts:1878;neuron_PSI:0.424;muscle_PSI:0.938	950	-	5895629	5896010	0	2	50,50	0,331
chrIII	5895629	5899855	neuron_readCounts:139;muscle_readCounts:124;neuron_PSI:0.576;muscle_PSI:0.062	950	-	5895629	5899855	0	2	50,50	0,4176
chrII	5947265	5948672	neuron_readCounts:1501;muscle_readCounts:73;neuron_PSI:0.282;muscle_PSI:0.682	950	-	5947265	5948672	0	2	50,50	0,1357
chrII	5947265	5951470	neuron_readCounts:9489;muscle_readCounts:30;neuron_PSI:0.718;muscle_PSI:0.318	950	-	5947265	5951470	0	2	50,50	0,4155
chrII	8931044	8932155	neuron_readCounts:143;muscle_readCounts:70;neuron_PSI:0.888;muscle_PSI:0.573	950	+	8931044	8932155	0	2	50,50	0,1061
chrII	8931140	8932155	neuron_readCounts:18;muscle_readCounts:52;neuron_PSI:0.112;muscle_PSI:0.427	950	+	8931140	8932155	0	2	50,50	0,965
chrIII	5971730	5972946	neuron_readCounts:246;muscle_readCounts:65;neuron_PSI:0.075;muscle_PSI:0.003	950	-	5971730	5972946	0	2	50,50	0,1166
chrIII	5972926	5973597	neuron_readCounts:4;muscle_readCounts:37;neuron_PSI:0.014;muscle_PSI:0.359	950	-	5972926	5973597	0	2	50,50	0,621
chrIII	5972926	5973356	neuron_readCounts:292;muscle_readCounts:59;neuron_PSI:0.986;muscle_PSI:0.641	950	-	5972926	5973356	0	2	50,50	0,380
chrIV	5986305	5986568	neuron_readCounts:1542;muscle_readCounts:24195;neuron_PSI:0.397;muscle_PSI:0.975	950	+	5986305	5986568	0	2	50,50	0,213
chrIV	5985120	5986568	neuron_readCounts:3021;muscle_readCounts:665;neuron_PSI:0.603;muscle_PSI:0.025	950	+	5985120	5986568	0	2	50,50	0,1398
chrI	5998753	5999144	neuron_readCounts:79;muscle_readCounts:11;neuron_PSI:0.554;muscle_PSI:0.066	950	-	5998753	5999144	0	2	50,50	0,341
chrI	5998753	6000804	neuron_readCounts:61;muscle_readCounts:159;neuron_PSI:0.446;muscle_PSI:0.934	950	-	5998753	6000804	0	2	50,50	0,2001
chrIII	6004591	6005300	neuron_readCounts:3352;muscle_readCounts:53;neuron_PSI:0.748;muscle_PSI:0.407	950	+	6004591	6005300	0	2	50,50	0,659
chrIII	6004591	6004854	neuron_readCounts:1083;muscle_readCounts:88;neuron_PSI:0.252;muscle_PSI:0.593	950	+	6004591	6004854	0	2	50,50	0,213
chrIII	6004898	6005300	neuron_readCounts:1106;muscle_readCounts:77;neuron_PSI:0.256;muscle_PSI:0.533	950	+	6004898	6005300	0	2	50,50	0,352
chrIII	6125596	6127087	neuron_readCounts:1540;muscle_readCounts:57;neuron_PSI:0.26;muscle_PSI:0.05	950	-	6125596	6127087	0	2	50,50	0,1441
chrIII	6126754	6127087	neuron_readCounts:4365;muscle_readCounts:1095;neuron_PSI:0.74;muscle_PSI:0.95	950	-	6126754	6127087	0	2	50,50	0,283
chrIII	6163143	6164342	neuron_readCounts:270;muscle_readCounts:66;neuron_PSI:0.879;muscle_PSI:0.135	950	+	6163143	6164342	0	2	50,50	0,1149
chrIII	6163143	6163448	neuron_readCounts:26;muscle_readCounts:318;neuron_PSI:0.121;muscle_PSI:0.865	950	+	6163143	6163448	0	2	50,50	0,255
chrIII	6163569	6164342	neuron_readCounts:43;muscle_readCounts:489;neuron_PSI:0.185;muscle_PSI:0.904	950	+	6163569	6164342	0	2	50,50	0,723
chrII	6197669	6197855	neuron_readCounts:2615;muscle_readCounts:558;neuron_PSI:0.498;muscle_PSI:0.752	950	+	6197669	6197855	0	2	50,50	0,136
chrII	6197669	6198076	neuron_readCounts:2981;muscle_readCounts:169;neuron_PSI:0.502;muscle_PSI:0.248	950	+	6197669	6198076	0	2	50,50	0,357
chrII	6197918	6198076	neuron_readCounts:2499;muscle_readCounts:521;neuron_PSI:0.475;muscle_PSI:0.727	950	+	6197918	6198076	0	2	50,50	0,108
chrI	9621233	9621375	neuron_readCounts:213;muscle_readCounts:62;neuron_PSI:0.211;muscle_PSI:0.554	950	+	9621233	9621375	0	2	50,50	0,92
chrI	9621233	9621384	neuron_readCounts:701;muscle_readCounts:44;neuron_PSI:0.789;muscle_PSI:0.446	950	+	9621233	9621384	0	2	50,50	0,101
chrI	9621408	9621548	neuron_readCounts:380;muscle_readCounts:115;neuron_PSI:0.283;muscle_PSI:0.56	950	+	9621408	9621548	0	2	50,50	0,90
chrI	9621408	9621557	neuron_readCounts:1095;muscle_readCounts:63;neuron_PSI:0.717;muscle_PSI:0.44	950	+	9621408	9621557	0	2	50,50	0,99
chrII	6490832	6491036	neuron_readCounts:1613;muscle_readCounts:223;neuron_PSI:0.246;muscle_PSI:0.068	950	+	6490832	6491036	0	2	50,50	0,154
chrII	6490609	6491036	neuron_readCounts:4732;muscle_readCounts:3124;neuron_PSI:0.754;muscle_PSI:0.932	950	+	6490609	6491036	0	2	50,50	0,377
chrV	10050669	10051489	neuron_readCounts:1054;muscle_readCounts:85;neuron_PSI:0.72;muscle_PSI:0.266	950	-	10050669	10051489	0	2	50,50	0,770
chrV	10050423	10051489	neuron_readCounts:393;muscle_readCounts:226;neuron_PSI:0.28;muscle_PSI:0.734	950	-	10050423	10051489	0	2	50,50	0,1016
chrIV	6914185	6914859	neuron_readCounts:606;muscle_readCounts:128;neuron_PSI:0.9;muscle_PSI:0.608	950	+	6914185	6914859	0	2	50,50	0,624
chrIV	6914185	6915127	neuron_readCounts:66;muscle_readCounts:85;neuron_PSI:0.1;muscle_PSI:0.392	950	+	6914185	6915127	0	2	50,50	0,892
chrIV	6914795	6915127	neuron_readCounts:564;muscle_readCounts:157;neuron_PSI:0.89;muscle_PSI:0.667	950	+	6914795	6915127	0	2	50,50	0,282
chrIII	6924993	6925405	neuron_readCounts:304;muscle_readCounts:3;neuron_PSI:0.298;muscle_PSI:0.006	950	-	6924993	6925405	0	2	50,50	0,362
chrIII	6924829	6925405	neuron_readCounts:727;muscle_readCounts:478;neuron_PSI:0.702;muscle_PSI:0.994	950	-	6924829	6925405	0	2	50,50	0,526
chrIII	6924829	6925057	neuron_readCounts:368;muscle_readCounts:5;neuron_PSI:0.339;muscle_PSI:0.01	950	-	6924829	6925057	0	2	50,50	0,178
chrIII	6927775	6928609	neuron_readCounts:270;muscle_readCounts:26;neuron_PSI:0.907;muscle_PSI:0.276	950	-	6927775	6928609	0	2	50,50	0,784
chrIII	6927666	6928609	neuron_readCounts:24;muscle_readCounts:117;neuron_PSI:0.093;muscle_PSI:0.724	950	-	6927666	6928609	0	2	50,50	0,893
chrIII	6927666	6927815	neuron_readCounts:253;muscle_readCounts:14;neuron_PSI:0.912;muscle_PSI:0.181	950	-	6927666	6927815	0	2	50,50	0,99
chrII	5204941	5205493	neuron_readCounts:17;muscle_readCounts:4;neuron_PSI:0.055;muscle_PSI:0.038	950	+	5204941	5205493	0	2	50,50	0,502
chrII	5204941	5205089	neuron_readCounts:97;muscle_readCounts:3;neuron_PSI:0.341;muscle_PSI:0.032	950	+	5204941	5205089	0	2	50,50	0,98
chrII	5204941	5206627	neuron_readCounts:174;muscle_readCounts:98;neuron_PSI:0.604;muscle_PSI:0.93	950	+	5204941	5206627	0	2	50,50	0,1636
chrII	5205582	5206627	neuron_readCounts:24;muscle_readCounts:3;neuron_PSI:0.089;muscle_PSI:0.032	950	+	5205582	5206627	0	2	50,50	0,995
chrII	5205025	5206627	neuron_readCounts:95;muscle_readCounts:2;neuron_PSI:0.318;muscle_PSI:0.026	950	+	5205025	5206627	0	2	50,50	0,1552
chrII	5206934	5207704	neuron_readCounts:40;muscle_readCounts:3;neuron_PSI:0.147;muscle_PSI:0.026	950	+	5206934	5207704	0	2	50,50	0,720
chrII	5206934	5207085	neuron_readCounts:107;muscle_readCounts:2;neuron_PSI:0.184;muscle_PSI:0.021	950	+	5206934	5207085	0	2	50,50	0,101
chrII	5206934	5207362	neuron_readCounts:5;muscle_readCounts:71;neuron_PSI:0.013;muscle_PSI:0.544	950	+	5206934	5207362	0	2	50,50	0,378
chrII	5206934	5207716	neuron_readCounts:276;muscle_readCounts:53;neuron_PSI:0.656;muscle_PSI:0.409	950	+	5206934	5207716	0	2	50,50	0,732
chrII	5207304	5207716	neuron_readCounts:6;muscle_readCounts:77;neuron_PSI:0.012;muscle_PSI:0.588	950	+	5207304	5207716	0	2	50,50	0,362
chrII	5206997	5207716	neuron_readCounts:107;muscle_readCounts:2;neuron_PSI:0.183;muscle_PSI:0.018	950	+	5206997	5207716	0	2	50,50	0,669
chrX	10607365	10608480	neuron_readCounts:621;muscle_readCounts:44;neuron_PSI:0.751;muscle_PSI:0.467	950	-	10607365	10608480	0	2	50,50	0,1065
chrX	10607365	10608492	neuron_readCounts:206;muscle_readCounts:53;neuron_PSI:0.249;muscle_PSI:0.533	950	-	10607365	10608492	0	2	50,50	0,1077
chrIV	7086049	7086232	neuron_readCounts:1041;muscle_readCounts:9762;neuron_PSI:0.537;muscle_PSI:0.995	950	-	7086049	7086232	0	2	50,50	0,133
chrIV	7085807	7086232	neuron_readCounts:918;muscle_readCounts:50;neuron_PSI:0.463;muscle_PSI:0.005	950	-	7085807	7086232	0	2	50,50	0,375
chrIV	7085807	7086116	neuron_readCounts:916;muscle_readCounts:8944;neuron_PSI:0.509;muscle_PSI:0.994	950	-	7085807	7086116	0	2	50,50	0,259
chrIV	7227567	7227745	neuron_readCounts:3881;muscle_readCounts:15;neuron_PSI:0.823;muscle_PSI:0.061	950	-	7227567	7227745	0	2	50,50	0,128
chrIV	7227457	7227745	neuron_readCounts:576;muscle_readCounts:329;neuron_PSI:0.177;muscle_PSI:0.939	950	-	7227457	7227745	0	2	50,50	0,238
chrIV	7227457	7227635	neuron_readCounts:2783;muscle_readCounts:8;neuron_PSI:0.634;muscle_PSI:0.032	950	-	7227457	7227635	0	2	50,50	0,128
chrIV	7227457	7227601	neuron_readCounts:711;muscle_readCounts:2;neuron_PSI:0.166;muscle_PSI:0.013	950	-	7227457	7227601	0	2	50,50	0,94
chrX	7239535	7240136	neuron_readCounts:1621;muscle_readCounts:616;neuron_PSI:0.909;muscle_PSI:0.322	950	-	7239535	7240136	0	2	50,50	0,551
chrX	7239792	7240136	neuron_readCounts:148;muscle_readCounts:1282;neuron_PSI:0.091;muscle_PSI:0.678	950	-	7239792	7240136	0	2	50,50	0,294
chrX	7239535	7239874	neuron_readCounts:158;muscle_readCounts:1267;neuron_PSI:0.098;muscle_PSI:0.675	950	-	7239535	7239874	0	2	50,50	0,289
chrI	7313849	7314006	neuron_readCounts:553;muscle_readCounts:7550;neuron_PSI:0.067;muscle_PSI:0.72	950	-	7313849	7314006	0	2	50,50	0,107
chrI	7313849	7314258	neuron_readCounts:8338;muscle_readCounts:3353;neuron_PSI:0.933;muscle_PSI:0.28	950	-	7313849	7314258	0	2	50,50	0,359
chrII	11127824	11128430	neuron_readCounts:13;muscle_readCounts:11;neuron_PSI:0.027;muscle_PSI:0.103	950	+	11127824	11128430	0	2	50,50	0,556
chrII	11127921	11128430	neuron_readCounts:263;muscle_readCounts:6;neuron_PSI:0.5;muscle_PSI:0.053	950	+	11127921	11128430	0	2	50,50	0,459
chrII	11127826	11128430	neuron_readCounts:224;muscle_readCounts:91;neuron_PSI:0.473;muscle_PSI:0.844	950	+	11127826	11128430	0	2	50,50	0,554
chrIV	7437809	7438237	neuron_readCounts:39;muscle_readCounts:216;neuron_PSI:0.228;muscle_PSI:0.82	950	+	7437809	7438237	0	2	50,50	0,378
chrIV	7437809	7437987	neuron_readCounts:127;muscle_readCounts:48;neuron_PSI:0.772;muscle_PSI:0.18	950	+	7437809	7437987	0	2	50,50	0,128
chrIV	7438004	7438237	neuron_readCounts:130;muscle_readCounts:61;neuron_PSI:0.772;muscle_PSI:0.214	950	+	7438004	7438237	0	2	50,50	0,183
chrIV	7438548	7438801	neuron_readCounts:45;muscle_readCounts:17;neuron_PSI:0.279;muscle_PSI:0.059	950	+	7438548	7438801	0	2	50,50	0,203
chrIV	7438548	7439105	neuron_readCounts:114;muscle_readCounts:273;neuron_PSI:0.721;muscle_PSI:0.941	950	+	7438548	7439105	0	2	50,50	0,507
chrIV	7440776	7440929	neuron_readCounts:212;muscle_readCounts:2;neuron_PSI:0.616;muscle_PSI:0.004	950	+	7440776	7440929	0	2	50,50	0,103
chrIV	7440776	7442083	neuron_readCounts:132;muscle_readCounts:549;neuron_PSI:0.384;muscle_PSI:0.996	950	+	7440776	7442083	0	2	50,50	0,1257
chrIV	7440866	7442083	neuron_readCounts:216;muscle_readCounts:2;neuron_PSI:0.618;muscle_PSI:0.004	950	+	7440866	7442083	0	2	50,50	0,1167
chrIV	7443061	7443569	neuron_readCounts:478;muscle_readCounts:529;neuron_PSI:0.814;muscle_PSI:0.414	950	+	7443061	7443569	0	2	50,50	0,458
chrIV	7443061	7443247	neuron_readCounts:103;muscle_readCounts:696;neuron_PSI:0.186;muscle_PSI:0.586	950	+	7443061	7443247	0	2	50,50	0,136
chrII	7495685	7496085	neuron_readCounts:297;muscle_readCounts:2150;neuron_PSI:0.604;muscle_PSI:0.976	950	+	7495685	7496085	0	2	50,50	0,350
chrII	7495909	7496085	neuron_readCounts:198;muscle_readCounts:57;neuron_PSI:0.396;muscle_PSI:0.024	950	+	7495909	7496085	0	2	50,50	0,126
chrI	5634544	5635691	neuron_readCounts:9;muscle_readCounts:8;neuron_PSI:0.007;muscle_PSI:0.082	950	+	5634544	5635691	0	2	50,50	0,1097
chrX	7600416	7601010	neuron_readCounts:335;muscle_readCounts:67;neuron_PSI:0.184;muscle_PSI:0.567	950	-	7600416	7601010	0	2	50,50	0,544
chrX	7600666	7600995	neuron_readCounts:671;muscle_readCounts:4;neuron_PSI:0.395;muscle_PSI:0.031	950	-	7600666	7600995	0	2	50,50	0,279
chrX	7600416	7600995	neuron_readCounts:726;muscle_readCounts:54;neuron_PSI:0.421;muscle_PSI:0.403	950	-	7600416	7600995	0	2	50,50	0,529
chrX	7600416	7600739	neuron_readCounts:764;muscle_readCounts:4;neuron_PSI:0.409;muscle_PSI:0.031	950	-	7600416	7600739	0	2	50,50	0,273
chrI	7685971	7686207	neuron_readCounts:613;muscle_readCounts:244;neuron_PSI:0.631;muscle_PSI:0.938	950	-	7685971	7686207	0	2	50,50	0,186
chrI	7685971	7686640	neuron_readCounts:435;muscle_readCounts:13;neuron_PSI:0.369;muscle_PSI:0.062	950	-	7685971	7686640	0	2	50,50	0,619
chrX	7790598	7790806	neuron_readCounts:2748;muscle_readCounts:25;neuron_PSI:0.539;muscle_PSI:0.084	950	-	7790598	7790806	0	2	50,50	0,158
chrX	7790598	7792758	neuron_readCounts:1775;muscle_readCounts:271;neuron_PSI:0.461;muscle_PSI:0.916	950	-	7790598	7792758	0	2	50,50	0,2110
chrIII	5889824	5891373	neuron_readCounts:447;muscle_readCounts:6953;neuron_PSI:0.321;muscle_PSI:0.977	950	-	5889824	5891373	0	2	50,50	0,1499
chrIII	5890627	5891373	neuron_readCounts:199;muscle_readCounts:85;neuron_PSI:0.158;muscle_PSI:0.015	950	-	5890627	5891373	0	2	50,50	0,696
chrIII	5891218	5891373	neuron_readCounts:687;muscle_readCounts:62;neuron_PSI:0.521;muscle_PSI:0.008	950	-	5891218	5891373	0	2	50,50	0,105
chrIV	11787748	11788978	neuron_readCounts:1092;muscle_readCounts:26;neuron_PSI:0.577;muscle_PSI:0.31	950	-	11787748	11788978	0	2	50,50	0,1180
chrIV	11787655	11788978	neuron_readCounts:778;muscle_readCounts:58;neuron_PSI:0.423;muscle_PSI:0.69	950	-	11787655	11788978	0	2	50,50	0,1273
chrIV	7905878	7906084	neuron_readCounts:263;muscle_readCounts:234;neuron_PSI:0.367;muscle_PSI:0.913	950	+	7905878	7906084	0	2	50,50	0,156
chrIV	7905878	7906832	neuron_readCounts:435;muscle_readCounts:28;neuron_PSI:0.633;muscle_PSI:0.087	950	+	7905878	7906832	0	2	50,50	0,904
chrIV	7906146	7906832	neuron_readCounts:345;muscle_readCounts:305;neuron_PSI:0.415;muscle_PSI:0.918	950	+	7906146	7906832	0	2	50,50	0,636
chrX	7940226	7940373	neuron_readCounts:332;muscle_readCounts:1123;neuron_PSI:0.482;muscle_PSI:0.937	950	-	7940226	7940373	0	2	50,50	0,97
chrX	7940126	7940373	neuron_readCounts:381;muscle_readCounts:76;neuron_PSI:0.518;muscle_PSI:0.063	950	-	7940126	7940373	0	2	50,50	0,197
chrX	7940574	7940933	neuron_readCounts:407;muscle_readCounts:140;neuron_PSI:0.524;muscle_PSI:0.099	950	-	7940574	7940933	0	2	50,50	0,309
chrX	7940774	7940933	neuron_readCounts:361;muscle_readCounts:1065;neuron_PSI:0.476;muscle_PSI:0.901	950	-	7940774	7940933	0	2	50,50	0,109
chrX	7940574	7940846	neuron_readCounts:361;muscle_readCounts:1047;neuron_PSI:0.476;muscle_PSI:0.899	950	-	7940574	7940846	0	2	50,50	0,222
chrX	7941640	7941980	neuron_readCounts:270;muscle_readCounts:803;neuron_PSI:0.556;muscle_PSI:0.958	950	-	7941640	7941980	0	2	50,50	0,290
chrX	7941640	7944569	neuron_readCounts:231;muscle_readCounts:35;neuron_PSI:0.444;muscle_PSI:0.042	950	-	7941640	7944569	0	2	50,50	0,2879
chrIII	7985125	7985714	neuron_readCounts:4440;muscle_readCounts:173;neuron_PSI:0.297;muscle_PSI:0.043	950	+	7985125	7985714	0	2	50,50	0,539
chrIII	7985125	7985392	neuron_readCounts:10703;muscle_readCounts:3849;neuron_PSI:0.703;muscle_PSI:0.957	950	+	7985125	7985392	0	2	50,50	0,217
chrIII	7985301	7985714	neuron_readCounts:10819;muscle_readCounts:3901;neuron_PSI:0.704;muscle_PSI:0.957	950	+	7985301	7985714	0	2	50,50	0,363
chrI	12207606	12208491	neuron_readCounts:99;muscle_readCounts:38;neuron_PSI:0.435;muscle_PSI:0.767	950	+	12207606	12208491	0	2	50,50	0,835
chrI	12207585	12208491	neuron_readCounts:128;muscle_readCounts:12;neuron_PSI:0.565;muscle_PSI:0.233	950	+	12207585	12208491	0	2	50,50	0,856
chrIV	8185335	8185674	neuron_readCounts:823;muscle_readCounts:13;neuron_PSI:0.691;muscle_PSI:0.249	950	+	8185335	8185674	0	2	50,50	0,289
chrIV	8178631	8185674	neuron_readCounts:364;muscle_readCounts:41;neuron_PSI:0.309;muscle_PSI:0.751	950	+	8178631	8185674	0	2	50,50	0,6993
chrII	8309410	8309775	neuron_readCounts:1017;muscle_readCounts:53;neuron_PSI:0.887;muscle_PSI:0.465	950	-	8309410	8309775	0	2	50,50	0,315
chrII	8307395	8309775	neuron_readCounts:144;muscle_readCounts:61;neuron_PSI:0.113;muscle_PSI:0.535	950	-	8307395	8309775	0	2	50,50	0,2330
chrX	12506964	12507120	neuron_readCounts:106;muscle_readCounts:53;neuron_PSI:0.273;muscle_PSI:0.868	950	-	12506964	12507120	0	2	50,50	0,106
chrX	12506916	12507120	neuron_readCounts:268;muscle_readCounts:8;neuron_PSI:0.727;muscle_PSI:0.132	950	-	12506916	12507120	0	2	50,50	0,154
chrIII	8486691	8487749	neuron_readCounts:449;muscle_readCounts:7;neuron_PSI:0.557;muscle_PSI:0.004	950	+	8486691	8487749	0	2	50,50	0,1008
chrIII	8486691	8487456	neuron_readCounts:366;muscle_readCounts:2002;neuron_PSI:0.443;muscle_PSI:0.996	950	+	8486691	8487456	0	2	50,50	0,715
chrIII	8487470	8487749	neuron_readCounts:284;muscle_readCounts:1331;neuron_PSI:0.343;muscle_PSI:0.582	950	+	8487470	8487749	0	2	50,50	0,229
chrIII	8487470	8487797	neuron_readCounts:90;muscle_readCounts:947;neuron_PSI:0.11;muscle_PSI:0.415	950	+	8487470	8487797	0	2	50,50	0,277
chrIV	8609871	8611425	neuron_readCounts:801;muscle_readCounts:520;neuron_PSI:0.472;muscle_PSI:0.981	950	+	8609871	8611425	0	2	50,50	0,1504
chrIV	8609871	8610433	neuron_readCounts:674;muscle_readCounts:4;neuron_PSI:0.295;muscle_PSI:0.01	950	+	8609871	8610433	0	2	50,50	0,512
chrIV	8609871	8610388	neuron_readCounts:502;muscle_readCounts:3;neuron_PSI:0.233;muscle_PSI:0.009	950	+	8609871	8610388	0	2	50,50	0,467
chrIV	8610399	8611425	neuron_readCounts:1485;muscle_readCounts:7;neuron_PSI:0.564;muscle_PSI:0.021	950	+	8610399	8611425	0	2	50,50	0,976
chrV	8789519	8789890	neuron_readCounts:68;muscle_readCounts:19;neuron_PSI:0.353;muscle_PSI:0.092	950	+	8789519	8789890	0	2	50,50	0,321
chrV	8789057	8789890	neuron_readCounts:126;muscle_readCounts:159;neuron_PSI:0.647;muscle_PSI:0.908	950	+	8789057	8789890	0	2	50,50	0,783
chrIV	8857395	8860140	neuron_readCounts:2;muscle_readCounts:11;neuron_PSI:0.008;muscle_PSI:0.04	950	+	8857395	8860140	0	2	50,50	0,2695
chrIV	8859831	8860131	neuron_readCounts:40;muscle_readCounts:2;neuron_PSI:0.133;muscle_PSI:0.01	950	+	8859831	8860131	0	2	50,50	0,250
chrIV	8857395	8860131	neuron_readCounts:42;muscle_readCounts:219;neuron_PSI:0.157;muscle_PSI:0.86	950	+	8857395	8860131	0	2	50,50	0,2686
chrIV	8859831	8860057	neuron_readCounts:200;muscle_readCounts:13;neuron_PSI:0.701;muscle_PSI:0.089	950	+	8859831	8860057	0	2	50,50	0,176
chrIII	8909061	8909282	neuron_readCounts:4909;muscle_readCounts:89;neuron_PSI:0.882;muscle_PSI:0.427	950	+	8909061	8909282	0	2	50,50	0,171
chrIII	8909061	8910130	neuron_readCounts:486;muscle_readCounts:112;neuron_PSI:0.118;muscle_PSI:0.573	950	+	8909061	8910130	0	2	50,50	0,1019
chrIII	8910171	8910383	neuron_readCounts:909;muscle_readCounts:211;neuron_PSI:0.097;muscle_PSI:0.64	950	+	8910171	8910383	0	2	50,50	0,162
chrIII	8909305	8910383	neuron_readCounts:10708;muscle_readCounts:129;neuron_PSI:0.903;muscle_PSI:0.36	950	+	8909305	8910383	0	2	50,50	0,1028
chrII	8968385	8968565	neuron_readCounts:50;muscle_readCounts:6;neuron_PSI:0.369;muscle_PSI:0.09	950	-	8968385	8968565	0	2	50,50	0,130
chrII	8967956	8968565	neuron_readCounts:5;muscle_readCounts:37;neuron_PSI:0.037;muscle_PSI:0.657	950	-	8967956	8968565	0	2	50,50	0,559
chrII	8968379	8968565	neuron_readCounts:80;muscle_readCounts:16;neuron_PSI:0.594;muscle_PSI:0.253	950	-	8968379	8968565	0	2	50,50	0,136
chrII	8967956	8968176	neuron_readCounts:230;muscle_readCounts:26;neuron_PSI:0.776;muscle_PSI:0.33	950	-	8967956	8968176	0	2	50,50	0,170
chrII	8967962	8968176	neuron_readCounts:64;muscle_readCounts:15;neuron_PSI:0.207;muscle_PSI:0.196	950	-	8967962	8968176	0	2	50,50	0,164
chrII	13502547	13503687	neuron_readCounts:183;muscle_readCounts:6;neuron_PSI:0.183;muscle_PSI:0.052	950	+	13502547	13503687	0	2	50,50	0,1090
chrII	13502625	13503687	neuron_readCounts:101;muscle_readCounts:27;neuron_PSI:0.1;muscle_PSI:0.174	950	+	13502625	13503687	0	2	50,50	0,1012
chrII	13502612	13503687	neuron_readCounts:230;muscle_readCounts:110;neuron_PSI:0.203;muscle_PSI:0.531	950	+	13502612	13503687	0	2	50,50	0,1025
chrII	13502621	13503687	neuron_readCounts:149;muscle_readCounts:39;neuron_PSI:0.139;muscle_PSI:0.148	950	+	13502621	13503687	0	2	50,50	0,1016
chrII	13502536	13503687	neuron_readCounts:391;muscle_readCounts:21;neuron_PSI:0.374;muscle_PSI:0.095	950	+	13502536	13503687	0	2	50,50	0,1101
chrI	9018708	9019540	neuron_readCounts:101;muscle_readCounts:30;neuron_PSI:0.67;muscle_PSI:0.052	950	+	9018708	9019540	0	2	50,50	0,782
chrI	9019265	9019540	neuron_readCounts:48;muscle_readCounts:608;neuron_PSI:0.33;muscle_PSI:0.948	950	+	9019265	9019540	0	2	50,50	0,225
chrII	9065355	9067096	neuron_readCounts:54;muscle_readCounts:22;neuron_PSI:0.353;muscle_PSI:0.087	950	-	9065355	9067096	0	2	50,50	0,1691
chrII	9066575	9067096	neuron_readCounts:103;muscle_readCounts:189;neuron_PSI:0.647;muscle_PSI:0.913	950	-	9066575	9067096	0	2	50,50	0,471
chrI	9174289	9175044	neuron_readCounts:958;muscle_readCounts:62;neuron_PSI:0.516;muscle_PSI:0.124	950	+	9174289	9175044	0	2	50,50	0,705
chrI	9171542	9175044	neuron_readCounts:888;muscle_readCounts:776;neuron_PSI:0.484;muscle_PSI:0.876	950	+	9171542	9175044	0	2	50,50	0,3452
chrI	6881462	6888195	neuron_readCounts:10;muscle_readCounts:10;neuron_PSI:0.122;muscle_PSI:0.148	950	-	6881462	6888195	0	2	50,50	0,6683
chrI	6881462	6881800	neuron_readCounts:10;muscle_readCounts:91;neuron_PSI:0.103;muscle_PSI:0.78	950	-	6881462	6881800	0	2	50,50	0,288
chrI	6881462	6882981	neuron_readCounts:63;muscle_readCounts:10;neuron_PSI:0.775;muscle_PSI:0.072	950	-	6881462	6882981	0	2	50,50	0,1469
chrI	13801112	13801873	neuron_readCounts:114;muscle_readCounts:16;neuron_PSI:0.374;muscle_PSI:0.145	950	-	13801112	13801873	0	2	50,50	0,711
chrI	13801119	13801873	neuron_readCounts:190;muscle_readCounts:95;neuron_PSI:0.626;muscle_PSI:0.855	950	-	13801119	13801873	0	2	50,50	0,704
chrX	13867246	13868081	neuron_readCounts:413;muscle_readCounts:7;neuron_PSI:0.874;muscle_PSI:0.017	950	-	13867246	13868081	0	2	50,50	0,785
chrX	13867246	13867955	neuron_readCounts:63;muscle_readCounts:521;neuron_PSI:0.126;muscle_PSI:0.983	950	-	13867246	13867955	0	2	50,50	0,659
chrII	9259334	9259720	neuron_readCounts:2943;muscle_readCounts:241;neuron_PSI:0.315;muscle_PSI:0.584	950	-	9259334	9259720	0	2	50,50	0,336
chrII	9259567	9259720	neuron_readCounts:9616;muscle_readCounts:172;neuron_PSI:0.685;muscle_PSI:0.416	950	-	9259567	9259720	0	2	50,50	0,103
chrII	9259334	9259639	neuron_readCounts:10478;muscle_readCounts:189;neuron_PSI:0.719;muscle_PSI:0.444	950	-	9259334	9259639	0	2	50,50	0,255
chrI	9273518	9278567	neuron_readCounts:391;muscle_readCounts:22;neuron_PSI:0.734;muscle_PSI:0.402	950	-	9273518	9278567	0	2	50,50	0,4999
chrI	9273518	9273716	neuron_readCounts:152;muscle_readCounts:33;neuron_PSI:0.266;muscle_PSI:0.598	950	-	9273518	9273716	0	2	50,50	0,148
chrII	14011561	14012444	neuron_readCounts:174;muscle_readCounts:4;neuron_PSI:0.498;muscle_PSI:0.034	950	+	14011561	14012444	0	2	50,50	0,833
chrII	14010742	14012444	neuron_readCounts:141;muscle_readCounts:86;neuron_PSI:0.402;muscle_PSI:0.786	950	+	14010742	14012444	0	2	50,50	0,1652
chrII	14011295	14012444	neuron_readCounts:35;muscle_readCounts:20;neuron_PSI:0.1;muscle_PSI:0.18	950	+	14011295	14012444	0	2	50,50	0,1099
chrII	7016329	7016723	neuron_readCounts:44;muscle_readCounts:58;neuron_PSI:0.096;muscle_PSI:0.662	950	-	7016329	7016723	0	2	50,50	0,344
chrII	7016329	7017362	neuron_readCounts:169;muscle_readCounts:11;neuron_PSI:0.384;muscle_PSI:0.098	950	-	7016329	7017362	0	2	50,50	0,983
chrII	7016329	7017506	neuron_readCounts:236;muscle_readCounts:25;neuron_PSI:0.52;muscle_PSI:0.24	950	-	7016329	7017506	0	2	50,50	0,1127
chrII	9365729	9367518	neuron_readCounts:894;muscle_readCounts:41;neuron_PSI:0.796;muscle_PSI:0.201	950	+	9365729	9367518	0	2	50,50	0,1739
chrII	9365729	9366022	neuron_readCounts:240;muscle_readCounts:185;neuron_PSI:0.204;muscle_PSI:0.799	950	+	9365729	9366022	0	2	50,50	0,243
chrV	9394160	9396796	neuron_readCounts:216;muscle_readCounts:128;neuron_PSI:0.617;muscle_PSI:0.92	950	+	9394160	9396796	0	2	50,50	0,2586
chrV	9396630	9396796	neuron_readCounts:133;muscle_readCounts:4;neuron_PSI:0.383;muscle_PSI:0.08	950	+	9396630	9396796	0	2	50,50	0,116
chrI	9442229	9443086	neuron_readCounts:953;muscle_readCounts:187;neuron_PSI:0.521;muscle_PSI:0.906	950	-	9442229	9443086	0	2	50,50	0,807
chrI	9441468	9443086	neuron_readCounts:889;muscle_readCounts:20;neuron_PSI:0.479;muscle_PSI:0.094	950	-	9441468	9443086	0	2	50,50	0,1568
chrI	9441468	9441990	neuron_readCounts:2138;muscle_readCounts:405;neuron_PSI:0.685;muscle_PSI:0.944	950	-	9441468	9441990	0	2	50,50	0,472
chrIII	9460173	9461115	neuron_readCounts:568;muscle_readCounts:300;neuron_PSI:0.464;muscle_PSI:0.816	950	+	9460173	9461115	0	2	50,50	0,892
chrIII	9460173	9460567	neuron_readCounts:641;muscle_readCounts:73;neuron_PSI:0.536;muscle_PSI:0.184	950	+	9460173	9460567	0	2	50,50	0,344
chrIII	9460644	9461115	neuron_readCounts:724;muscle_readCounts:99;neuron_PSI:0.562;muscle_PSI:0.247	950	+	9460644	9461115	0	2	50,50	0,421
chrV	7107151	7112931	neuron_readCounts:2216;muscle_readCounts:24;neuron_PSI:0.648;muscle_PSI:0.27	950	+	7107151	7112931	0	2	50,50	0,5730
chrV	7103794	7112931	neuron_readCounts:553;muscle_readCounts:5;neuron_PSI:0.155;muscle_PSI:0.055	950	+	7103794	7112931	0	2	50,50	0,9087
chrV	7109550	7112931	neuron_readCounts:619;muscle_readCounts:58;neuron_PSI:0.196;muscle_PSI:0.675	950	+	7109550	7112931	0	2	50,50	0,3331
chrIII	9550333	9550770	neuron_readCounts:178;muscle_readCounts:5;neuron_PSI:0.48;muscle_PSI:0.089	950	+	9550333	9550770	0	2	50,50	0,387
chrIII	9553673	9554147	neuron_readCounts:768;muscle_readCounts:12;neuron_PSI:0.821;muscle_PSI:0.213	950	+	9553673	9554147	0	2	50,50	0,424
chrIII	9553673	9554492	neuron_readCounts:167;muscle_readCounts:41;neuron_PSI:0.179;muscle_PSI:0.787	950	+	9553673	9554492	0	2	50,50	0,769
chrIII	9554131	9554492	neuron_readCounts:809;muscle_readCounts:13;neuron_PSI:0.829;muscle_PSI:0.238	950	+	9554131	9554492	0	2	50,50	0,311
chrV	9553946	9554668	neuron_readCounts:905;muscle_readCounts:267;neuron_PSI:0.424;muscle_PSI:0.684	950	+	9553946	9554668	0	2	50,50	0,672
chrV	9553946	9554902	neuron_readCounts:1178;muscle_readCounts:125;neuron_PSI:0.576;muscle_PSI:0.316	950	+	9553946	9554902	0	2	50,50	0,906
chrV	9554688	9554902	neuron_readCounts:951;muscle_readCounts:289;neuron_PSI:0.437;muscle_PSI:0.698	950	+	9554688	9554902	0	2	50,50	0,164
chrX	9556784	9557267	neuron_readCounts:508;muscle_readCounts:71;neuron_PSI:0.945;muscle_PSI:0.615	950	+	9556784	9557267	0	2	50,50	0,433
chrX	9556784	9557007	neuron_readCounts:26;muscle_readCounts:43;neuron_PSI:0.055;muscle_PSI:0.385	950	+	9556784	9557007	0	2	50,50	0,173
chrX	9557000	9557267	neuron_readCounts:34;muscle_readCounts:89;neuron_PSI:0.07;muscle_PSI:0.537	950	+	9557000	9557267	0	2	50,50	0,217
chrII	9578416	9579242	neuron_readCounts:198;muscle_readCounts:65;neuron_PSI:0.572;muscle_PSI:0.868	950	+	9578416	9579242	0	2	50,50	0,776
chrII	9578416	9579849	neuron_readCounts:152;muscle_readCounts:10;neuron_PSI:0.428;muscle_PSI:0.132	950	+	9578416	9579849	0	2	50,50	0,1383
chrII	9579246	9579849	neuron_readCounts:228;muscle_readCounts:71;neuron_PSI:0.604;muscle_PSI:0.876	950	+	9579246	9579849	0	2	50,50	0,553
chrV	9584412	9586233	neuron_readCounts:75;muscle_readCounts:17;neuron_PSI:0.486;muscle_PSI:0.061	950	+	9584412	9586233	0	2	50,50	0,1771
chrV	9583643	9586233	neuron_readCounts:83;muscle_readCounts:264;neuron_PSI:0.514;muscle_PSI:0.939	950	+	9583643	9586233	0	2	50,50	0,2540
chrII	9760848	9762000	neuron_readCounts:170;muscle_readCounts:25;neuron_PSI:0.944;muscle_PSI:0.48	950	+	9760848	9762000	0	2	50,50	0,1102
chrII	9758328	9762000	neuron_readCounts:10;muscle_readCounts:27;neuron_PSI:0.056;muscle_PSI:0.52	950	+	9758328	9762000	0	2	50,50	0,3622
chrIII	9855533	9856140	neuron_readCounts:1259;muscle_readCounts:355;neuron_PSI:0.866;muscle_PSI:0.409	950	-	9855533	9856140	0	2	50,50	0,557
chrIII	9855913	9856140	neuron_readCounts:198;muscle_readCounts:527;neuron_PSI:0.134;muscle_PSI:0.591	950	-	9855913	9856140	0	2	50,50	0,177
chrIII	9855533	9855986	neuron_readCounts:202;muscle_readCounts:548;neuron_PSI:0.135;muscle_PSI:0.6	950	-	9855533	9855986	0	2	50,50	0,403
chrIV	7438848	7439105	neuron_readCounts:60;muscle_readCounts:31;neuron_PSI:0.327;muscle_PSI:0.093	950	+	7438848	7439105	0	2	50,50	0,207
chrIV	7438273	7439105	neuron_readCounts:10;muscle_readCounts:31;neuron_PSI:0.045;muscle_PSI:0.092	950	+	7438273	7439105	0	2	50,50	0,782
chrIV	9923989	9924296	neuron_readCounts:78;muscle_readCounts:46;neuron_PSI:0.835;muscle_PSI:0.564	950	-	9923989	9924296	0	2	50,50	0,257
chrIV	9922476	9924296	neuron_readCounts:16;muscle_readCounts:43;neuron_PSI:0.165;muscle_PSI:0.436	950	-	9922476	9924296	0	2	50,50	0,1770
chrIV	7443177	7443569	neuron_readCounts:121;muscle_readCounts:703;neuron_PSI:0.18;muscle_PSI:0.521	950	+	7443177	7443569	0	2	50,50	0,342
chrIV	7442847	7443569	neuron_readCounts:87;muscle_readCounts:121;neuron_PSI:0.131;muscle_PSI:0.12	950	+	7442847	7443569	0	2	50,50	0,672
chrV	9985345	9985859	neuron_readCounts:170;muscle_readCounts:54;neuron_PSI:0.744;muscle_PSI:0.372	950	-	9985345	9985859	0	2	50,50	0,464
chrV	9985345	9985545	neuron_readCounts:78;muscle_readCounts:91;neuron_PSI:0.256;muscle_PSI:0.628	950	-	9985345	9985545	0	2	50,50	0,150
chrX	9993171	9993680	neuron_readCounts:562;muscle_readCounts:78;neuron_PSI:0.307;muscle_PSI:0.62	950	-	9993171	9993680	0	2	50,50	0,459
chrX	9993239	9993680	neuron_readCounts:420;muscle_readCounts:40;neuron_PSI:0.23;muscle_PSI:0.31	950	-	9993239	9993680	0	2	50,50	0,391
chrX	9992104	9993680	neuron_readCounts:846;muscle_readCounts:9;neuron_PSI:0.462;muscle_PSI:0.07	950	-	9992104	9993680	0	2	50,50	0,1526
chrX	9992104	9993006	neuron_readCounts:1511;muscle_readCounts:170;neuron_PSI:0.637;muscle_PSI:0.946	950	-	9992104	9993006	0	2	50,50	0,852
chrII	9991379	9994325	neuron_readCounts:1035;muscle_readCounts:731;neuron_PSI:0.671;muscle_PSI:0.919	950	+	9991379	9994325	0	2	50,50	0,2896
chrII	9993916	9994325	neuron_readCounts:512;muscle_readCounts:58;neuron_PSI:0.329;muscle_PSI:0.081	950	+	9993916	9994325	0	2	50,50	0,359
chrV	10022998	10023608	neuron_readCounts:184;muscle_readCounts:44;neuron_PSI:0.73;muscle_PSI:0.278	950	+	10022998	10023608	0	2	50,50	0,560
chrV	10022484	10023608	neuron_readCounts:71;muscle_readCounts:155;neuron_PSI:0.27;muscle_PSI:0.722	950	+	10022484	10023608	0	2	50,50	0,1074
chrI	10088445	10089911	neuron_readCounts:731;muscle_readCounts:289;neuron_PSI:0.953;muscle_PSI:0.452	950	-	10088445	10089911	0	2	50,50	0,1416
chrI	10088445	10088649	neuron_readCounts:35;muscle_readCounts:348;neuron_PSI:0.047;muscle_PSI:0.548	950	-	10088445	10088649	0	2	50,50	0,154
chrI	10093727	10093914	neuron_readCounts:273;muscle_readCounts:54;neuron_PSI:0.62;muscle_PSI:0.273	950	-	10093727	10093914	0	2	50,50	0,137
chrI	10093733	10100713	neuron_readCounts:24;muscle_readCounts:7;neuron_PSI:0.055;muscle_PSI:0.037	950	-	10093733	10100713	0	2	50,50	0,6930
chrI	10093727	10100713	neuron_readCounts:143;muscle_readCounts:130;neuron_PSI:0.325;muscle_PSI:0.69	950	-	10093727	10100713	0	2	50,50	0,6936
chrX	10101544	10101892	neuron_readCounts:387;muscle_readCounts:162;neuron_PSI:0.745;muscle_PSI:0.98	950	+	10101544	10101892	0	2	50,50	0,298
chrX	10101544	10101709	neuron_readCounts:124;muscle_readCounts:2;neuron_PSI:0.255;muscle_PSI:0.02	950	+	10101544	10101709	0	2	50,50	0,115
chrX	10101636	10101892	neuron_readCounts:160;muscle_readCounts:2;neuron_PSI:0.312;muscle_PSI:0.02	950	+	10101636	10101892	0	2	50,50	0,206
chrV	10250626	10250890	neuron_readCounts:218;muscle_readCounts:101;neuron_PSI:0.245;muscle_PSI:0.637	950	+	10250626	10250890	0	2	50,50	0,214
chrV	10250626	10251376	neuron_readCounts:671;muscle_readCounts:58;neuron_PSI:0.755;muscle_PSI:0.363	950	+	10250626	10251376	0	2	50,50	0,700
chrV	10250982	10251726	neuron_readCounts:310;muscle_readCounts:161;neuron_PSI:0.211;muscle_PSI:0.663	950	+	10250982	10251726	0	2	50,50	0,694
chrV	10251483	10251726	neuron_readCounts:1141;muscle_readCounts:82;neuron_PSI:0.789;muscle_PSI:0.337	950	+	10251483	10251726	0	2	50,50	0,193
chrIV	10326594	10329146	neuron_readCounts:3487;muscle_readCounts:191;neuron_PSI:0.464;muscle_PSI:0.149	950	-	10326594	10329146	0	2	50,50	0,2502
chrIV	10327665	10329146	neuron_readCounts:4022;muscle_readCounts:1082;neuron_PSI:0.536;muscle_PSI:0.851	950	-	10327665	10329146	0	2	50,50	0,1431
chrIV	10326594	10327651	neuron_readCounts:5619;muscle_readCounts:1296;neuron_PSI:0.616;muscle_PSI:0.872	950	-	10326594	10327651	0	2	50,50	0,1007
chrX	15498842	15498997	neuron_readCounts:74;muscle_readCounts:51;neuron_PSI:0.596;muscle_PSI:0.879	950	+	15498842	15498997	0	2	50,50	0,105
chrX	15498580	15498997	neuron_readCounts:51;muscle_readCounts:7;neuron_PSI:0.404;muscle_PSI:0.121	950	+	15498580	15498997	0	2	50,50	0,367
chrIV	10338247	10338535	neuron_readCounts:2541;muscle_readCounts:184;neuron_PSI:0.99;muscle_PSI:0.515	950	-	10338247	10338535	0	2	50,50	0,238
chrIV	10338247	10338753	neuron_readCounts:26;muscle_readCounts:178;neuron_PSI:0.01;muscle_PSI:0.485	950	-	10338247	10338753	0	2	50,50	0,456
chrIV	10338508	10338906	neuron_readCounts:2233;muscle_readCounts:134;neuron_PSI:0.99;muscle_PSI:0.492	950	-	10338508	10338906	0	2	50,50	0,348
chrIV	10338726	10338906	neuron_readCounts:23;muscle_readCounts:141;neuron_PSI:0.01;muscle_PSI:0.508	950	-	10338726	10338906	0	2	50,50	0,130
chrX	10423761	10424281	neuron_readCounts:171;muscle_readCounts:79;neuron_PSI:0.459;muscle_PSI:0.738	950	-	10423761	10424281	0	2	50,50	0,470
chrX	10423761	10424171	neuron_readCounts:196;muscle_readCounts:28;neuron_PSI:0.541;muscle_PSI:0.262	950	-	10423761	10424171	0	2	50,50	0,360
chrIII	10466137	10467087	neuron_readCounts:274;muscle_readCounts:9;neuron_PSI:0.422;muscle_PSI:0.076	950	+	10466137	10467087	0	2	50,50	0,900
chrIII	10466137	10466344	neuron_readCounts:381;muscle_readCounts:124;neuron_PSI:0.578;muscle_PSI:0.924	950	+	10466137	10466344	0	2	50,50	0,157
chrIII	10466532	10467087	neuron_readCounts:399;muscle_readCounts:202;neuron_PSI:0.609;muscle_PSI:0.961	950	+	10466532	10467087	0	2	50,50	0,505
chrI	10475118	10475267	neuron_readCounts:432;muscle_readCounts:62;neuron_PSI:0.932;muscle_PSI:0.717	950	+	10475118	10475267	0	2	50,50	0,99
chrI	10475118	10475400	neuron_readCounts:24;muscle_readCounts:24;neuron_PSI:0.068;muscle_PSI:0.283	950	+	10475118	10475400	0	2	50,50	0,232
chrIV	10494002	10494558	neuron_readCounts:94;muscle_readCounts:430;neuron_PSI:0.014;muscle_PSI:0.645	950	-	10494002	10494558	0	2	50,50	0,506
chrIV	10494002	10494880	neuron_readCounts:6856;muscle_readCounts:236;neuron_PSI:0.986;muscle_PSI:0.355	950	-	10494002	10494880	0	2	50,50	0,828
chrIV	10494577	10495231	neuron_readCounts:59;muscle_readCounts:425;neuron_PSI:0.014;muscle_PSI:0.631	950	-	10494577	10495231	0	2	50,50	0,604
chrIV	10494878	10495231	neuron_readCounts:4633;muscle_readCounts:239;neuron_PSI:0.986;muscle_PSI:0.369	950	-	10494878	10495231	0	2	50,50	0,303
chrIV	10495216	10498017	neuron_readCounts:2486;muscle_readCounts:658;neuron_PSI:0.607;muscle_PSI:0.965	950	-	10495216	10498017	0	2	50,50	0,2751
chrIV	10496486	10498017	neuron_readCounts:273;muscle_readCounts:2;neuron_PSI:0.072;muscle_PSI:0.003	950	-	10496486	10498017	0	2	50,50	0,1481
chrIV	10496492	10498017	neuron_readCounts:1311;muscle_readCounts:21;neuron_PSI:0.322;muscle_PSI:0.032	950	-	10496492	10498017	0	2	50,50	0,1475
chrIII	10528918	10529387	neuron_readCounts:183;muscle_readCounts:4;neuron_PSI:0.498;muscle_PSI:0.047	950	+	10528918	10529387	0	2	50,50	0,419
chrIII	10528786	10529387	neuron_readCounts:166;muscle_readCounts:77;neuron_PSI:0.502;muscle_PSI:0.953	950	+	10528786	10529387	0	2	50,50	0,551
chrII	7912913	7913224	neuron_readCounts:1285;muscle_readCounts:43;neuron_PSI:0.69;muscle_PSI:0.472	950	-	7912913	7913224	0	2	50,50	0,261
chrII	7912913	7913785	neuron_readCounts:305;muscle_readCounts:2;neuron_PSI:0.158;muscle_PSI:0.025	950	-	7912913	7913785	0	2	50,50	0,822
chrII	7912913	7914047	neuron_readCounts:282;muscle_readCounts:47;neuron_PSI:0.151;muscle_PSI:0.503	950	-	7912913	7914047	0	2	50,50	0,1084
chrI	10639823	10639968	neuron_readCounts:436;muscle_readCounts:17;neuron_PSI:0.386;muscle_PSI:0.042	950	-	10639823	10639968	0	2	50,50	0,95
chrI	10639701	10639968	neuron_readCounts:783;muscle_readCounts:387;neuron_PSI:0.614;muscle_PSI:0.958	950	-	10639701	10639968	0	2	50,50	0,217
chrI	10639701	10639890	neuron_readCounts:449;muscle_readCounts:14;neuron_PSI:0.394;muscle_PSI:0.039	950	-	10639701	10639890	0	2	50,50	0,139
chrI	8179968	8183334	neuron_readCounts:28;muscle_readCounts:42;neuron_PSI:0.273;muscle_PSI:0.727	950	+	8179968	8183334	0	2	50,50	0,3316
chrI	8180981	8183334	neuron_readCounts:14;muscle_readCounts:3;neuron_PSI:0.16;muscle_PSI:0.058	950	+	8180981	8183334	0	2	50,50	0,2303
chrI	8183081	8183334	neuron_readCounts:7;muscle_readCounts:2;neuron_PSI:0.08;muscle_PSI:0.036	950	+	8183081	8183334	0	2	50,50	0,203
chrI	8176818	8183334	neuron_readCounts:45;muscle_readCounts:11;neuron_PSI:0.486;muscle_PSI:0.18	950	+	8176818	8183334	0	2	50,50	0,6466
chrV	16370720	16370886	neuron_readCounts:198;muscle_readCounts:51;neuron_PSI:0.184;muscle_PSI:0.478	950	+	16370720	16370886	0	2	50,50	0,116
chrV	16370720	16370892	neuron_readCounts:827;muscle_readCounts:55;neuron_PSI:0.816;muscle_PSI:0.522	950	+	16370720	16370892	0	2	50,50	0,122
chrII	11060014	11060312	neuron_readCounts:137;muscle_readCounts:74;neuron_PSI:0.204;muscle_PSI:0.962	950	-	11060014	11060312	0	2	50,50	0,248
chrII	11060167	11060312	neuron_readCounts:509;muscle_readCounts:3;neuron_PSI:0.796;muscle_PSI:0.038	950	-	11060167	11060312	0	2	50,50	0,95
chrII	11060014	11060246	neuron_readCounts:527;muscle_readCounts:4;neuron_PSI:0.801;muscle_PSI:0.048	950	-	11060014	11060246	0	2	50,50	0,182
chrX	16818321	16818818	neuron_readCounts:82;muscle_readCounts:3;neuron_PSI:0.257;muscle_PSI:0.029	950	-	16818321	16818818	0	2	50,50	0,447
chrX	16818321	16819044	neuron_readCounts:228;muscle_readCounts:97;neuron_PSI:0.743;muscle_PSI:0.971	950	-	16818321	16819044	0	2	50,50	0,673
chrIII	11340772	11341824	neuron_readCounts:557;muscle_readCounts:59;neuron_PSI:0.098;muscle_PSI:0.401	950	+	11340772	11341824	0	2	50,50	0,1002
chrIII	11340772	11340989	neuron_readCounts:6011;muscle_readCounts:80;neuron_PSI:0.902;muscle_PSI:0.599	950	+	11340772	11340989	0	2	50,50	0,167
chrV	11377167	11377385	neuron_readCounts:39874;muscle_readCounts:2578;neuron_PSI:0.992;muscle_PSI:0.423	950	+	11377167	11377385	0	2	50,50	0,168
chrV	11377167	11377891	neuron_readCounts:299;muscle_readCounts:3639;neuron_PSI:0.008;muscle_PSI:0.577	950	+	11377167	11377891	0	2	50,50	0,674
chrX	11394946	11395316	neuron_readCounts:3341;muscle_readCounts:21;neuron_PSI:0.843;muscle_PSI:0.333	950	-	11394946	11395316	0	2	50,50	0,320
chrX	11395170	11395316	neuron_readCounts:665;muscle_readCounts:51;neuron_PSI:0.157;muscle_PSI:0.667	950	-	11395170	11395316	0	2	50,50	0,96
chrX	11394946	11395234	neuron_readCounts:776;muscle_readCounts:56;neuron_PSI:0.188;muscle_PSI:0.684	950	-	11394946	11395234	0	2	50,50	0,238
chrX	11670390	11670787	neuron_readCounts:347;muscle_readCounts:84;neuron_PSI:0.53;muscle_PSI:0.977	950	+	11670390	11670787	0	2	50,50	0,347
chrX	11670390	11670536	neuron_readCounts:308;muscle_readCounts:2;neuron_PSI:0.47;muscle_PSI:0.023	950	+	11670390	11670536	0	2	50,50	0,96
chrX	11670450	11670787	neuron_readCounts:212;muscle_readCounts:3;neuron_PSI:0.38;muscle_PSI:0.034	950	+	11670450	11670787	0	2	50,50	0,287
chrI	11688938	11689394	neuron_readCounts:533;muscle_readCounts:115;neuron_PSI:0.129;muscle_PSI:0.608	950	-	11688938	11689394	0	2	50,50	0,406
chrI	11689063	11689394	neuron_readCounts:3599;muscle_readCounts:43;neuron_PSI:0.853;muscle_PSI:0.202	950	-	11689063	11689394	0	2	50,50	0,281
chrI	11688913	11689394	neuron_readCounts:70;muscle_readCounts:39;neuron_PSI:0.018;muscle_PSI:0.189	950	-	11688913	11689394	0	2	50,50	0,431
chrI	11688938	11689084	neuron_readCounts:2617;muscle_readCounts:38;neuron_PSI:0.806;muscle_PSI:0.164	950	-	11688938	11689084	0	2	50,50	0,96
chrV	8788628	8789511	neuron_readCounts:306;muscle_readCounts:11;neuron_PSI:0.765;muscle_PSI:0.088	950	+	8788628	8789511	0	2	50,50	0,833
chrV	8788628	8789064	neuron_readCounts:90;muscle_readCounts:102;neuron_PSI:0.23;muscle_PSI:0.84	950	+	8788628	8789064	0	2	50,50	0,386
chrV	8788628	8790977	neuron_readCounts:2;muscle_readCounts:10;neuron_PSI:0.005;muscle_PSI:0.072	950	+	8788628	8790977	0	2	50,50	0,2299
chrI	11749111	11749324	neuron_readCounts:85;muscle_readCounts:7;neuron_PSI:0.269;muscle_PSI:0.03	950	-	11749111	11749324	0	2	50,50	0,163
chrI	11748807	11749324	neuron_readCounts:232;muscle_readCounts:245;neuron_PSI:0.731;muscle_PSI:0.97	950	-	11748807	11749324	0	2	50,50	0,467
chrI	11748807	11749178	neuron_readCounts:81;muscle_readCounts:8;neuron_PSI:0.258;muscle_PSI:0.032	950	-	11748807	11749178	0	2	50,50	0,321
chrV	11777804	11781306	neuron_readCounts:52;muscle_readCounts:13;neuron_PSI:0.782;muscle_PSI:0.068	950	+	11777804	11781306	0	2	50,50	0,3452
chrV	11781132	11781306	neuron_readCounts:12;muscle_readCounts:137;neuron_PSI:0.218;muscle_PSI:0.932	950	+	11781132	11781306	0	2	50,50	0,124
chrX	17679269	17679971	neuron_readCounts:319;muscle_readCounts:58;neuron_PSI:0.377;muscle_PSI:0.034	950	+	17679269	17679971	0	2	50,50	0,652
chrX	17679619	17679971	neuron_readCounts:537;muscle_readCounts:3014;neuron_PSI:0.623;muscle_PSI:0.966	950	+	17679619	17679971	0	2	50,50	0,302
chrX	11832770	11833286	neuron_readCounts:39;muscle_readCounts:118;neuron_PSI:0.253;muscle_PSI:0.966	950	+	11832770	11833286	0	2	50,50	0,466
chrX	11832770	11832931	neuron_readCounts:114;muscle_readCounts:4;neuron_PSI:0.747;muscle_PSI:0.034	950	+	11832770	11832931	0	2	50,50	0,111
chrX	11832948	11833286	neuron_readCounts:100;muscle_readCounts:2;neuron_PSI:0.715;muscle_PSI:0.017	950	+	11832948	11833286	0	2	50,50	0,288
chrIII	11839825	11841897	neuron_readCounts:527;muscle_readCounts:7;neuron_PSI:0.628;muscle_PSI:0.053	950	-	11839825	11841897	0	2	50,50	0,2022
chrIII	11838070	11841897	neuron_readCounts:305;muscle_readCounts:119;neuron_PSI:0.372;muscle_PSI:0.947	950	-	11838070	11841897	0	2	50,50	0,3777
chrIII	11838070	11839799	neuron_readCounts:807;muscle_readCounts:14;neuron_PSI:0.725;muscle_PSI:0.096	950	-	11838070	11839799	0	2	50,50	0,1679
chrIII	11939131	11941214	neuron_readCounts:160;muscle_readCounts:1168;neuron_PSI:0.125;muscle_PSI:0.657	950	-	11939131	11941214	0	2	50,50	0,2033
chrIII	11934130	11941214	neuron_readCounts:1364;muscle_readCounts:796;neuron_PSI:0.875;muscle_PSI:0.343	950	-	11934130	11941214	0	2	50,50	0,7034
chrII	11978872	11979097	neuron_readCounts:2683;muscle_readCounts:1186;neuron_PSI:0.496;muscle_PSI:0.7	950	-	11978872	11979097	0	2	50,50	0,175
chrII	11978872	11979332	neuron_readCounts:2733;muscle_readCounts:516;neuron_PSI:0.504;muscle_PSI:0.3	950	-	11978872	11979332	0	2	50,50	0,410
chrX	11998357	11998549	neuron_readCounts:459;muscle_readCounts:54;neuron_PSI:0.782;muscle_PSI:0.382	950	-	11998357	11998549	0	2	50,50	0,142
chrX	11998041	11998549	neuron_readCounts:109;muscle_readCounts:70;neuron_PSI:0.218;muscle_PSI:0.618	950	-	11998041	11998549	0	2	50,50	0,458
chrX	11998041	11998360	neuron_readCounts:628;muscle_readCounts:53;neuron_PSI:0.838;muscle_PSI:0.387	950	-	11998041	11998360	0	2	50,50	0,269
chrIII	12052664	12053635	neuron_readCounts:6343;muscle_readCounts:882;neuron_PSI:0.969;muscle_PSI:0.226	950	-	12052664	12053635	0	2	50,50	0,921
chrIII	12053456	12053635	neuron_readCounts:168;muscle_readCounts:2254;neuron_PSI:0.031;muscle_PSI:0.774	950	-	12053456	12053635	0	2	50,50	0,129
chrIII	12052664	12053535	neuron_readCounts:160;muscle_readCounts:2225;neuron_PSI:0.028;muscle_PSI:0.768	950	-	12052664	12053535	0	2	50,50	0,821
chrII	9064224	9065233	neuron_readCounts:166;muscle_readCounts:53;neuron_PSI:0.6;muscle_PSI:0.096	950	-	9064224	9065233	0	2	50,50	0,959
chrII	9064224	9066105	neuron_readCounts:29;muscle_readCounts:15;neuron_PSI:0.088;muscle_PSI:0.022	950	-	9064224	9066105	0	2	50,50	0,1831
chrII	9064224	9065695	neuron_readCounts:95;muscle_readCounts:450;neuron_PSI:0.311;muscle_PSI:0.882	950	-	9064224	9065695	0	2	50,50	0,1421
chrIV	12135521	12136127	neuron_readCounts:837;muscle_readCounts:8;neuron_PSI:0.271;muscle_PSI:0.009	950	-	12135521	12136127	0	2	50,50	0,556
chrIV	12135521	12136252	neuron_readCounts:2096;muscle_readCounts:1163;neuron_PSI:0.729;muscle_PSI:0.991	950	-	12135521	12136252	0	2	50,50	0,681
chrII	9123286	9130997	neuron_readCounts:3326;muscle_readCounts:718;neuron_PSI:0.612;muscle_PSI:0.836	950	+	9123286	9130997	0	2	50,50	0,7661
chrII	9127577	9130997	neuron_readCounts:632;muscle_readCounts:88;neuron_PSI:0.125;muscle_PSI:0.123	950	+	9127577	9130997	0	2	50,50	0,3370
chrII	9130839	9130997	neuron_readCounts:1599;muscle_readCounts:32;neuron_PSI:0.263;muscle_PSI:0.04	950	+	9130839	9130997	0	2	50,50	0,108
chrIV	12413189	12413903	neuron_readCounts:212;muscle_readCounts:198;neuron_PSI:0.038;muscle_PSI:0.716	950	-	12413189	12413903	0	2	50,50	0,664
chrIV	12413751	12413903	neuron_readCounts:5936;muscle_readCounts:86;neuron_PSI:0.962;muscle_PSI:0.284	950	-	12413751	12413903	0	2	50,50	0,102
chrIV	12413189	12413794	neuron_readCounts:7515;muscle_readCounts:117;neuron_PSI:0.968;muscle_PSI:0.346	950	-	12413189	12413794	0	2	50,50	0,555
chrV	12480838	12481333	neuron_readCounts:53;muscle_readCounts:891;neuron_PSI:0.59;muscle_PSI:0.971	950	+	12480838	12481333	0	2	50,50	0,445
chrV	12481146	12481333	neuron_readCounts:37;muscle_readCounts:21;neuron_PSI:0.41;muscle_PSI:0.029	950	+	12481146	12481333	0	2	50,50	0,137
chrII	9365026	9367518	neuron_readCounts:170;muscle_readCounts:14;neuron_PSI:0.121;muscle_PSI:0.054	950	+	9365026	9367518	0	2	50,50	0,2442
chrII	9367299	9367518	neuron_readCounts:4;muscle_readCounts:28;neuron_PSI:0.003;muscle_PSI:0.081	950	+	9367299	9367518	0	2	50,50	0,169
chrII	9366123	9367518	neuron_readCounts:361;muscle_readCounts:222;neuron_PSI:0.244;muscle_PSI:0.72	950	+	9366123	9367518	0	2	50,50	0,1345
chrX	12505859	12506200	neuron_readCounts:370;muscle_readCounts:73;neuron_PSI:0.607;muscle_PSI:0.973	950	-	12505859	12506200	0	2	50,50	0,291
chrX	12505979	12506200	neuron_readCounts:242;muscle_readCounts:2;neuron_PSI:0.393;muscle_PSI:0.027	950	-	12505979	12506200	0	2	50,50	0,171
chrX	12505859	12506058	neuron_readCounts:251;muscle_readCounts:2;neuron_PSI:0.399;muscle_PSI:0.027	950	-	12505859	12506058	0	2	50,50	0,149
chrV	12699218	12699456	neuron_readCounts:1217;muscle_readCounts:157;neuron_PSI:0.428;muscle_PSI:0.193	950	+	12699218	12699456	0	2	50,50	0,188
chrV	12699218	12699898	neuron_readCounts:1699;muscle_readCounts:700;neuron_PSI:0.572;muscle_PSI:0.807	950	+	12699218	12699898	0	2	50,50	0,630
chrV	12699395	12699898	neuron_readCounts:1180;muscle_readCounts:147;neuron_PSI:0.419;muscle_PSI:0.184	950	+	12699395	12699898	0	2	50,50	0,453
chrV	12700050	12703770	neuron_readCounts:5910;muscle_readCounts:1705;neuron_PSI:0.468;muscle_PSI:0.954	950	+	12700050	12703770	0	2	50,50	0,3670
chrV	12703593	12703770	neuron_readCounts:6590;muscle_readCounts:70;neuron_PSI:0.532;muscle_PSI:0.046	950	+	12703593	12703770	0	2	50,50	0,127
chrIII	9549407	9550415	neuron_readCounts:38;muscle_readCounts:5;neuron_PSI:0.113;muscle_PSI:0.08	950	+	9549407	9550415	0	2	50,50	0,958
chrIII	9549407	9549696	neuron_readCounts:140;muscle_readCounts:4;neuron_PSI:0.409;muscle_PSI:0.064	950	+	9549407	9549696	0	2	50,50	0,239
chrIII	9549407	9550770	neuron_readCounts:16;muscle_readCounts:20;neuron_PSI:0.047;muscle_PSI:0.308	950	+	9549407	9550770	0	2	50,50	0,1313
chrX	9555275	9556677	neuron_readCounts:54;muscle_readCounts:44;neuron_PSI:0.127;muscle_PSI:0.465	950	+	9555275	9556677	0	2	50,50	0,1352
chrX	9555275	9555465	neuron_readCounts:381;muscle_readCounts:46;neuron_PSI:0.868;muscle_PSI:0.465	950	+	9555275	9555465	0	2	50,50	0,140
chrX	9555275	9555848	neuron_readCounts:2;muscle_readCounts:7;neuron_PSI:0.006;muscle_PSI:0.07	950	+	9555275	9555848	0	2	50,50	0,523
chrIV	13033880	13034873	neuron_readCounts:3391;muscle_readCounts:258;neuron_PSI:0.882;muscle_PSI:0.543	950	+	13033880	13034873	0	2	50,50	0,943
chrIV	13033880	13034502	neuron_readCounts:460;muscle_readCounts:189;neuron_PSI:0.118;muscle_PSI:0.457	950	+	13033880	13034502	0	2	50,50	0,572
chrIV	13034478	13034873	neuron_readCounts:510;muscle_readCounts:267;neuron_PSI:0.13;muscle_PSI:0.537	950	+	13034478	13034873	0	2	50,50	0,345
chrI	13036864	13043025	neuron_readCounts:185;muscle_readCounts:875;neuron_PSI:0.107;muscle_PSI:0.737	950	+	13036864	13043025	0	2	50,50	0,6111
chrI	13035596	13043025	neuron_readCounts:1509;muscle_readCounts:364;neuron_PSI:0.893;muscle_PSI:0.263	950	+	13035596	13043025	0	2	50,50	0,7379
chrI	13043057	13043863	neuron_readCounts:2831;muscle_readCounts:2032;neuron_PSI:0.736;muscle_PSI:0.987	950	+	13043057	13043863	0	2	50,50	0,756
chrI	13043057	13043584	neuron_readCounts:1014;muscle_readCounts:23;neuron_PSI:0.264;muscle_PSI:0.013	950	+	13043057	13043584	0	2	50,50	0,477
chrI	13043505	13043863	neuron_readCounts:1151;muscle_readCounts:19;neuron_PSI:0.289;muscle_PSI:0.01	950	+	13043505	13043863	0	2	50,50	0,308
chrV	13275635	13275926	neuron_readCounts:204;muscle_readCounts:13;neuron_PSI:0.734;muscle_PSI:0.099	950	-	13275635	13275926	0	2	50,50	0,241
chrV	13275346	13275926	neuron_readCounts:74;muscle_readCounts:209;neuron_PSI:0.266;muscle_PSI:0.901	950	-	13275346	13275926	0	2	50,50	0,530
chrV	13275346	13275618	neuron_readCounts:289;muscle_readCounts:34;neuron_PSI:0.794;muscle_PSI:0.22	950	-	13275346	13275618	0	2	50,50	0,222
chrIII	9960736	9961597	neuron_readCounts:432;muscle_readCounts:61;neuron_PSI:0.154;muscle_PSI:0.096	950	+	9960736	9961597	0	2	50,50	0,811
chrIII	9960736	9961433	neuron_readCounts:539;muscle_readCounts:408;neuron_PSI:0.2;muscle_PSI:0.762	950	+	9960736	9961433	0	2	50,50	0,647
chrIII	9960736	9961284	neuron_readCounts:1806;muscle_readCounts:66;neuron_PSI:0.646;muscle_PSI:0.142	950	+	9960736	9961284	0	2	50,50	0,498
chrIII	13280607	13282273	neuron_readCounts:869;muscle_readCounts:16;neuron_PSI:0.767;muscle_PSI:0.15	950	+	13280607	13282273	0	2	50,50	0,1616
chrIII	13280607	13283836	neuron_readCounts:298;muscle_readCounts:180;neuron_PSI:0.233;muscle_PSI:0.85	950	+	13280607	13283836	0	2	50,50	0,3179
chrV	13554936	13555149	neuron_readCounts:186;muscle_readCounts:154;neuron_PSI:0.593;muscle_PSI:0.923	950	-	13554936	13555149	0	2	50,50	0,163
chrV	13554471	13555149	neuron_readCounts:128;muscle_readCounts:12;neuron_PSI:0.407;muscle_PSI:0.077	950	-	13554471	13555149	0	2	50,50	0,628
chrX	13625847	13626965	neuron_readCounts:441;muscle_readCounts:84;neuron_PSI:0.497;muscle_PSI:0.915	950	-	13625847	13626965	0	2	50,50	0,1068
chrX	13626711	13626965	neuron_readCounts:533;muscle_readCounts:10;neuron_PSI:0.503;muscle_PSI:0.085	950	-	13626711	13626965	0	2	50,50	0,204
chrIV	13761867	13765866	neuron_readCounts:41;muscle_readCounts:158;neuron_PSI:0.433;muscle_PSI:0.987	950	+	13761867	13765866	0	2	50,50	0,3949
chrIV	13765691	13765866	neuron_readCounts:52;muscle_readCounts:2;neuron_PSI:0.567;muscle_PSI:0.013	950	+	13765691	13765866	0	2	50,50	0,125
chrII	14102387	14102697	neuron_readCounts:3539;muscle_readCounts:1272;neuron_PSI:0.625;muscle_PSI:0.978	950	+	14102387	14102697	0	2	50,50	0,260
chrII	14101449	14102697	neuron_readCounts:2272;muscle_readCounts:22;neuron_PSI:0.375;muscle_PSI:0.022	950	+	14101449	14102697	0	2	50,50	0,1198
chrV	14116630	14117552	neuron_readCounts:1827;muscle_readCounts:179;neuron_PSI:0.913;muscle_PSI:0.592	950	-	14116630	14117552	0	2	50,50	0,872
chrV	14115532	14117552	neuron_readCounts:177;muscle_readCounts:123;neuron_PSI:0.087;muscle_PSI:0.408	950	-	14115532	14117552	0	2	50,50	0,1970
chrV	14115532	14116496	neuron_readCounts:2280;muscle_readCounts:269;neuron_PSI:0.928;muscle_PSI:0.683	950	-	14115532	14116496	0	2	50,50	0,914
chrV	14121462	14122257	neuron_readCounts:206;muscle_readCounts:18;neuron_PSI:0.69;muscle_PSI:0.188	950	-	14121462	14122257	0	2	50,50	0,745
chrV	14120968	14122257	neuron_readCounts:94;muscle_readCounts:70;neuron_PSI:0.31;muscle_PSI:0.812	950	-	14120968	14122257	0	2	50,50	0,1239
chrV	14120968	14121394	neuron_readCounts:43;muscle_readCounts:5;neuron_PSI:0.102;muscle_PSI:0.045	950	-	14120968	14121394	0	2	50,50	0,376
chrV	14120968	14121418	neuron_readCounts:287;muscle_readCounts:28;neuron_PSI:0.678;muscle_PSI:0.289	950	-	14120968	14121418	0	2	50,50	0,400
chrX	14289250	14293656	neuron_readCounts:152;muscle_readCounts:27;neuron_PSI:0.863;muscle_PSI:0.087	950	-	14289250	14293656	0	2	50,50	0,4356
chrX	14289250	14289454	neuron_readCounts:23;muscle_readCounts:280;neuron_PSI:0.137;muscle_PSI:0.913	950	-	14289250	14289454	0	2	50,50	0,154
chrI	14342063	14342234	neuron_readCounts:1159;muscle_readCounts:5;neuron_PSI:0.95;muscle_PSI:0.031	950	-	14342063	14342234	0	2	50,50	0,121
chrI	14341891	14342234	neuron_readCounts:61;muscle_readCounts:148;neuron_PSI:0.05;muscle_PSI:0.969	950	-	14341891	14342234	0	2	50,50	0,293
chrI	14341891	14342093	neuron_readCounts:1468;muscle_readCounts:19;neuron_PSI:0.96;muscle_PSI:0.114	950	-	14341891	14342093	0	2	50,50	0,152
chrIV	14361279	14363607	neuron_readCounts:514;muscle_readCounts:39;neuron_PSI:0.88;muscle_PSI:0.229	950	+	14361279	14363607	0	2	50,50	0,2278
chrIV	14362238	14363607	neuron_readCounts:69;muscle_readCounts:106;neuron_PSI:0.12;muscle_PSI:0.771	950	+	14362238	14363607	0	2	50,50	0,1319
chrI	14541757	14543389	neuron_readCounts:1086;muscle_readCounts:31;neuron_PSI:0.894;muscle_PSI:0.134	950	+	14541757	14543389	0	2	50,50	0,1582
chrI	14541757	14542313	neuron_readCounts:125;muscle_readCounts:274;neuron_PSI:0.106;muscle_PSI:0.866	950	+	14541757	14542313	0	2	50,50	0,506
chrI	14542330	14543389	neuron_readCounts:176;muscle_readCounts:439;neuron_PSI:0.141;muscle_PSI:0.938	950	+	14542330	14543389	0	2	50,50	0,1009
chrI	14569890	14570102	neuron_readCounts:221;muscle_readCounts:198;neuron_PSI:0.324;muscle_PSI:0.747	950	-	14569890	14570102	0	2	50,50	0,162
chrI	14567447	14570102	neuron_readCounts:464;muscle_readCounts:76;neuron_PSI:0.676;muscle_PSI:0.253	950	-	14567447	14570102	0	2	50,50	0,2605
chrI	14567447	14569966	neuron_readCounts:236;muscle_readCounts:176;neuron_PSI:0.338;muscle_PSI:0.725	950	-	14567447	14569966	0	2	50,50	0,2469
chrX	14622423	14622807	neuron_readCounts:241;muscle_readCounts:65;neuron_PSI:0.223;muscle_PSI:0.932	950	+	14622423	14622807	0	2	50,50	0,334
chrX	14622423	14622620	neuron_readCounts:843;muscle_readCounts:4;neuron_PSI:0.777;muscle_PSI:0.068	950	+	14622423	14622620	0	2	50,50	0,147
chrX	14622565	14622807	neuron_readCounts:784;muscle_readCounts:3;neuron_PSI:0.763;muscle_PSI:0.05	950	+	14622565	14622807	0	2	50,50	0,192
chrI	14624611	14625005	neuron_readCounts:1478;muscle_readCounts:542;neuron_PSI:0.285;muscle_PSI:0.59	950	-	14624611	14625005	0	2	50,50	0,344
chrI	14624370	14625005	neuron_readCounts:3768;muscle_readCounts:355;neuron_PSI:0.715;muscle_PSI:0.41	950	-	14624370	14625005	0	2	50,50	0,585
chrIV	14797023	14797434	neuron_readCounts:2000;muscle_readCounts:20296;neuron_PSI:0.172;muscle_PSI:0.781	950	-	14797023	14797434	0	2	50,50	0,361
chrIV	14797132	14797434	neuron_readCounts:9810;muscle_readCounts:5719;neuron_PSI:0.828;muscle_PSI:0.219	950	-	14797132	14797434	0	2	50,50	0,252
chrIV	14797023	14797183	neuron_readCounts:9706;muscle_readCounts:5342;neuron_PSI:0.824;muscle_PSI:0.207	950	-	14797023	14797183	0	2	50,50	0,110
chrI	14847875	14848618	neuron_readCounts:462;muscle_readCounts:26;neuron_PSI:0.632;muscle_PSI:0.072	950	+	14847875	14848618	0	2	50,50	0,693
chrI	14847875	14848120	neuron_readCounts:324;muscle_readCounts:627;neuron_PSI:0.368;muscle_PSI:0.928	950	+	14847875	14848120	0	2	50,50	0,195
chrI	14878943	14880064	neuron_readCounts:2226;muscle_readCounts:107;neuron_PSI:0.621;muscle_PSI:0.195	950	-	14878943	14880064	0	2	50,50	0,1071
chrII	14952401	14953002	neuron_readCounts:1289;muscle_readCounts:21;neuron_PSI:0.337;muscle_PSI:0.116	950	+	14952401	14953002	0	2	50,50	0,551
chrII	14952401	14952659	neuron_readCounts:2435;muscle_readCounts:134;neuron_PSI:0.663;muscle_PSI:0.884	950	+	14952401	14952659	0	2	50,50	0,208
chrIV	15022442	15023451	neuron_readCounts:2833;muscle_readCounts:23;neuron_PSI:0.405;muscle_PSI:0.046	950	+	15022442	15023451	0	2	50,50	0,959
chrIV	15022442	15024178	neuron_readCounts:4151;muscle_readCounts:460;neuron_PSI:0.595;muscle_PSI:0.954	950	+	15022442	15024178	0	2	50,50	0,1686
chrIV	15023390	15024178	neuron_readCounts:2208;muscle_readCounts:41;neuron_PSI:0.347;muscle_PSI:0.068	950	+	15023390	15024178	0	2	50,50	0,738
chrIV	9119911	9127244	neuron_readCounts:178;muscle_readCounts:30;neuron_PSI:0.548;muscle_PSI:0.332	950	+	9119911	9127244	0	2	50,50	0,7283
chrIV	9126295	9127244	neuron_readCounts:23;muscle_readCounts:2;neuron_PSI:0.078;muscle_PSI:0.023	950	+	9126295	9127244	0	2	50,50	0,899
chrIV	9120216	9127244	neuron_readCounts:53;muscle_readCounts:18;neuron_PSI:0.164;muscle_PSI:0.188	950	+	9120216	9127244	0	2	50,50	0,6978
chrIV	9122210	9127244	neuron_readCounts:67;muscle_readCounts:41;neuron_PSI:0.209;muscle_PSI:0.457	950	+	9122210	9127244	0	2	50,50	0,4984
chrX	15269676	15270709	neuron_readCounts:581;muscle_readCounts:41;neuron_PSI:0.708;muscle_PSI:0.21	950	-	15269676	15270709	0	2	50,50	0,983
chrX	15572290	15572563	neuron_readCounts:4147;muscle_readCounts:54;neuron_PSI:0.895;muscle_PSI:0.167	950	+	15572290	15572563	0	2	50,50	0,223
chrX	15572290	15572926	neuron_readCounts:434;muscle_readCounts:266;neuron_PSI:0.105;muscle_PSI:0.833	950	+	15572290	15572926	0	2	50,50	0,586
chrX	15572545	15572926	neuron_readCounts:4789;muscle_readCounts:47;neuron_PSI:0.894;muscle_PSI:0.156	950	+	15572545	15572926	0	2	50,50	0,331
chrIII	11934130	11939021	neuron_readCounts:95;muscle_readCounts:284;neuron_PSI:0.041;muscle_PSI:0.129	950	-	11934130	11939021	0	2	50,50	0,4841
chrIII	11934130	11936963	neuron_readCounts:536;muscle_readCounts:885;neuron_PSI:0.253;muscle_PSI:0.486	950	-	11934130	11936963	0	2	50,50	0,2783
chrX	9554773	9556677	neuron_readCounts:8;muscle_readCounts:10;neuron_PSI:0.017;muscle_PSI:0.075	950	+	9554773	9556677	0	2	50,50	0,1854
chrX	9556303	9556677	neuron_readCounts:114;muscle_readCounts:52;neuron_PSI:0.248;muscle_PSI:0.478	950	+	9556303	9556677	0	2	50,50	0,324
chrX	9555623	9556677	neuron_readCounts:321;muscle_readCounts:7;neuron_PSI:0.628;muscle_PSI:0.059	950	+	9555623	9556677	0	2	50,50	0,1004
chrX	16401919	16406436	neuron_readCounts:105;muscle_readCounts:21;neuron_PSI:0.589;muscle_PSI:0.19	950	-	16401919	16406436	0	2	50,50	0,4467
chrX	16401919	16403187	neuron_readCounts:84;muscle_readCounts:131;neuron_PSI:0.411;muscle_PSI:0.81	950	-	16401919	16403187	0	2	50,50	0,1218
chrX	16809548	16809748	neuron_readCounts:107;muscle_readCounts:607;neuron_PSI:0.199;muscle_PSI:0.58	950	-	16809548	16809748	0	2	50,50	0,150
chrX	16809548	16813585	neuron_readCounts:414;muscle_readCounts:516;neuron_PSI:0.801;muscle_PSI:0.42	950	-	16809548	16813585	0	2	50,50	0,3987
chrII	8497585	8499711	neuron_readCounts:10;muscle_readCounts:2;neuron_PSI:0.087;muscle_PSI:0.016	950	-	8497585	8499711	0	2	50,50	0,2076
chrII	8497585	8506535	neuron_readCounts:22;muscle_readCounts:36;neuron_PSI:0.171;muscle_PSI:0.304	950	-	8497585	8506535	0	2	50,50	0,8900
chrII	8497585	8498610	neuron_readCounts:10;muscle_readCounts:81;neuron_PSI:0.071;muscle_PSI:0.64	950	-	8497585	8498610	0	2	50,50	0,975
chrII	8497585	8505310	neuron_readCounts:6;muscle_readCounts:3;neuron_PSI:0.054;muscle_PSI:0.024	950	-	8497585	8505310	0	2	50,50	0,7675
chrII	8497585	8501415	neuron_readCounts:76;muscle_readCounts:2;neuron_PSI:0.617;muscle_PSI:0.016	950	-	8497585	8501415	0	2	50,50	0,3780
chrX	17005656	17008249	neuron_readCounts:1131;muscle_readCounts:46;neuron_PSI:0.909;muscle_PSI:0.538	950	+	17005656	17008249	0	2	50,50	0,2543
chrX	17007147	17008249	neuron_readCounts:110;muscle_readCounts:38;neuron_PSI:0.091;muscle_PSI:0.462	950	+	17007147	17008249	0	2	50,50	0,1052
chrII	12810552	12810710	neuron_readCounts:191;muscle_readCounts:342;neuron_PSI:0.1;muscle_PSI:0.341	950	+	12810552	12810710	0	2	50,50	0,108
chrII	12809781	12810710	neuron_readCounts:818;muscle_readCounts:228;neuron_PSI:0.499;muscle_PSI:0.186	950	+	12809781	12810710	0	2	50,50	0,879
chrII	12809371	12810710	neuron_readCounts:716;muscle_readCounts:579;neuron_PSI:0.401;muscle_PSI:0.473	950	+	12809371	12810710	0	2	50,50	0,1289
chrX	17434528	17434966	neuron_readCounts:45;muscle_readCounts:16;neuron_PSI:0.637;muscle_PSI:0.37	950	+	17434528	17434966	0	2	50,50	0,388
chrX	17434528	17435463	neuron_readCounts:27;muscle_readCounts:29;neuron_PSI:0.363;muscle_PSI:0.63	950	+	17434528	17435463	0	2	50,50	0,885
chrX	13155428	13155630	neuron_readCounts:301;muscle_readCounts:183;neuron_PSI:0.372;muscle_PSI:0.751	950	-	13155428	13155630	0	2	50,50	0,152
chrX	13155428	13169726	neuron_readCounts:438;muscle_readCounts:10;neuron_PSI:0.539;muscle_PSI:0.04	950	-	13155428	13169726	0	2	50,50	0,14248
chrX	13155428	13161387	neuron_readCounts:74;muscle_readCounts:51;neuron_PSI:0.089;muscle_PSI:0.209	950	-	13155428	13161387	0	2	50,50	0,5909
chrX	13625847	13627232	neuron_readCounts:149;muscle_readCounts:2;neuron_PSI:0.134;muscle_PSI:0.029	950	-	13625847	13627232	0	2	50,50	0,1335
chrX	13625847	13626679	neuron_readCounts:589;muscle_readCounts:5;neuron_PSI:0.436;muscle_PSI:0.051	950	-	13625847	13626679	0	2	50,50	0,782
chrX	13870482	13871761	neuron_readCounts:11;muscle_readCounts:181;neuron_PSI:0.081;muscle_PSI:0.798	950	-	13870482	13871761	0	2	50,50	0,1229
chrX	13870482	13870697	neuron_readCounts:56;muscle_readCounts:7;neuron_PSI:0.558;muscle_PSI:0.139	950	-	13870482	13870697	0	2	50,50	0,165
chrX	13870482	13876566	neuron_readCounts:41;muscle_readCounts:8;neuron_PSI:0.36;muscle_PSI:0.063	950	-	13870482	13876566	0	2	50,50	0,6034
chrI	14623848	14624079	neuron_readCounts:13048;muscle_readCounts:267555;neuron_PSI:0.718;muscle_PSI:0.997	950	-	14623848	14624079	0	2	50,50	0,181
chrI	14623848	14624352	neuron_readCounts:3060;muscle_readCounts:249;neuron_PSI:0.178;muscle_PSI:0.001	950	-	14623848	14624352	0	2	50,50	0,454
chrI	14623848	14624593	neuron_readCounts:1599;muscle_readCounts:556;neuron_PSI:0.104;muscle_PSI:0.002	950	-	14623848	14624593	0	2	50,50	0,695
chrV	19535105	19535932	neuron_readCounts:548;muscle_readCounts:8428;neuron_PSI:0.416;muscle_PSI:0.843	950	-	19535105	19535932	0	2	50,50	0,777
chrV	19535105	19535817	neuron_readCounts:757;muscle_readCounts:596;neuron_PSI:0.49;muscle_PSI:0.068	950	-	19535105	19535817	0	2	50,50	0,662
chrV	19535105	19537484	neuron_readCounts:137;muscle_readCounts:732;neuron_PSI:0.095;muscle_PSI:0.089	950	-	19535105	19537484	0	2	50,50	0,2329
chrV	19539292	19539463	neuron_readCounts:269;muscle_readCounts:1141;neuron_PSI:0.558;muscle_PSI:0.338	950	-	19539292	19539463	0	2	50,50	0,121
chrV	19539292	19543309	neuron_readCounts:216;muscle_readCounts:2254;neuron_PSI:0.442;muscle_PSI:0.662	950	-	19539292	19543309	0	2	50,50	0,3967
chrI	14847612	14847798	neuron_readCounts:536;muscle_readCounts:465;neuron_PSI:0.393;muscle_PSI:0.953	950	+	14847612	14847798	0	2	50,50	0,136
chrI	14847612	14848618	neuron_readCounts:190;muscle_readCounts:3;neuron_PSI:0.168;muscle_PSI:0.009	950	+	14847612	14848618	0	2	50,50	0,956
chrI	14847612	14848120	neuron_readCounts:582;muscle_readCounts:15;neuron_PSI:0.439;muscle_PSI:0.039	950	+	14847612	14848120	0	2	50,50	0,458
chrI	14878943	14881101	neuron_readCounts:1321;muscle_readCounts:453;neuron_PSI:0.49;muscle_PSI:0.812	950	-	14878943	14881101	0	2	50,50	0,2108
chrI	14880081	14881101	neuron_readCounts:148;muscle_readCounts:9;neuron_PSI:0.055;muscle_PSI:0.022	950	-	14880081	14881101	0	2	50,50	0,970
chrI	14880796	14881101	neuron_readCounts:1234;muscle_readCounts:95;neuron_PSI:0.455;muscle_PSI:0.166	950	-	14880796	14881101	0	2	50,50	0,255
chrV	20012137	20014933	neuron_readCounts:2915;muscle_readCounts:72;neuron_PSI:0.794;muscle_PSI:0.041	950	+	20012137	20014933	0	2	50,50	0,2746
chrV	20012137	20013332	neuron_readCounts:659;muscle_readCounts:1109;neuron_PSI:0.206;muscle_PSI:0.959	950	+	20012137	20013332	0	2	50,50	0,1145
chrX	15269676	15271276	neuron_readCounts:239;muscle_readCounts:138;neuron_PSI:0.244;muscle_PSI:0.81	950	-	15269676	15271276	0	2	50,50	0,1550
chrX	15271073	15271276	neuron_readCounts:572;muscle_readCounts:8;neuron_PSI:0.584;muscle_PSI:0.046	950	-	15271073	15271276	0	2	50,50	0,153
chrX	15270698	15271276	neuron_readCounts:167;muscle_readCounts:25;neuron_PSI:0.172;muscle_PSI:0.143	950	-	15270698	15271276	0	2	50,50	0,528
chrX	17678722	17678979	neuron_readCounts:257;muscle_readCounts:1465;neuron_PSI:0.419;muscle_PSI:0.772	950	+	17678722	17678979	0	2	50,50	0,207
chrX	17677194	17678979	neuron_readCounts:87;muscle_readCounts:442;neuron_PSI:0.143;muscle_PSI:0.193	950	+	17677194	17678979	0	2	50,50	0,1735
chrX	17677939	17678979	neuron_readCounts:268;muscle_readCounts:60;neuron_PSI:0.438;muscle_PSI:0.035	950	+	17677939	17678979	0	2	50,50	0,990
chrX	17678722	17679971	neuron_readCounts:521;muscle_readCounts:7215;neuron_PSI:0.368;muscle_PSI:0.672	950	+	17678722	17679971	0	2	50,50	0,1199
chrX	17677194	17679971	neuron_readCounts:90;muscle_readCounts:1019;neuron_PSI:0.061;muscle_PSI:0.07	950	+	17677194	17679971	0	2	50,50	0,2727
chrX	16642245	16643348	neuron_readCounts:36;muscle_readCounts:12;neuron_PSI:0.193;muscle_PSI:0.095	950	-	16642245	16643348	0	2	50,50	0,1053
chrX	16642245	16652169	neuron_readCounts:73;muscle_readCounts:81;neuron_PSI:0.431;muscle_PSI:0.735	950	-	16642245	16652169	0	2	50,50	0,9874
chrX	16642245	16642805	neuron_readCounts:7;muscle_readCounts:17;neuron_PSI:0.036;muscle_PSI:0.151	950	-	16642245	16642805	0	2	50,50	0,510
chrX	16642245	16661275	neuron_readCounts:59;muscle_readCounts:2;neuron_PSI:0.34;muscle_PSI:0.018	950	-	16642245	16661275	0	2	50,50	0,18980
chrI	14937096	14940950	neuron_readCounts:28;muscle_readCounts:92;neuron_PSI:0.01;muscle_PSI:0.163	950	+	14937096	14940950	0	2	50,50	0,3804
chrI	14933923	14940950	neuron_readCounts:1520;muscle_readCounts:116;neuron_PSI:0.534;muscle_PSI:0.228	950	+	14933923	14940950	0	2	50,50	0,6977
chrI	14934885	14940950	neuron_readCounts:272;muscle_readCounts:3;neuron_PSI:0.104;muscle_PSI:0.006	950	+	14934885	14940950	0	2	50,50	0,6015
chrI	14940334	14940950	neuron_readCounts:682;muscle_readCounts:8;neuron_PSI:0.232;muscle_PSI:0.015	950	+	14940334	14940950	0	2	50,50	0,566
chrI	14938642	14940950	neuron_readCounts:155;muscle_readCounts:2;neuron_PSI:0.056;muscle_PSI:0.004	950	+	14938642	14940950	0	2	50,50	0,2258
chrI	14919620	14940950	neuron_readCounts:191;muscle_readCounts:311;neuron_PSI:0.064;muscle_PSI:0.584	950	+	14919620	14940950	0	2	50,50	0,21280

## Sheet: neuron_vs_intestine
track name=neuron_vs_intestine description='neuron_vs_intestine_tissue_differential'
chrV	31532	35064	neuron_readCounts:66;intestine_readCounts:36;neuron_PSI:0.261;intestine_PSI:0.648	950	+	31532	35064	0	2	50,50	0,3482
chrV	30247	35064	neuron_readCounts:177;intestine_readCounts:20;neuron_PSI:0.739;intestine_PSI:0.352	950	+	30247	35064	0	2	50,50	0,4767
chrII	72562	74339	neuron_readCounts:264;intestine_readCounts:559;neuron_PSI:0.466;intestine_PSI:0.986	950	-	72562	74339	0	2	50,50	0,1727
chrII	72562	72761	neuron_readCounts:521;intestine_readCounts:10;neuron_PSI:0.534;intestine_PSI:0.014	950	-	72562	72761	0	2	50,50	0,149
chrIV	140931	141117	neuron_readCounts:36;intestine_readCounts:114;neuron_PSI:0.229;intestine_PSI:0.822	950	-	140931	141117	0	2	50,50	0,136
chrIV	140648	141117	neuron_readCounts:185;intestine_readCounts:22;neuron_PSI:0.771;intestine_PSI:0.178	950	-	140648	141117	0	2	50,50	0,419
chrIV	140648	140854	neuron_readCounts:29;intestine_readCounts:121;neuron_PSI:0.212;intestine_PSI:0.858	950	-	140648	140854	0	2	50,50	0,156
chrII	167028	167944	neuron_readCounts:21;intestine_readCounts:33;neuron_PSI:0.046;intestine_PSI:0.044	950	+	167028	167944	0	2	50,50	0,866
chrII	167028	167223	neuron_readCounts:237;intestine_readCounts:134;neuron_PSI:0.5;intestine_PSI:0.225	950	+	167028	167223	0	2	50,50	0,145
chrII	167028	167953	neuron_readCounts:215;intestine_readCounts:393;neuron_PSI:0.454;intestine_PSI:0.731	950	+	167028	167953	0	2	50,50	0,875
chrII	167336	167953	neuron_readCounts:423;intestine_readCounts:238;neuron_PSI:0.663;intestine_PSI:0.314	950	+	167336	167953	0	2	50,50	0,567
chrV	171306	176728	neuron_readCounts:990;intestine_readCounts:1139;neuron_PSI:0.745;intestine_PSI:0.972	950	+	171306	176728	0	2	50,50	0,5372
chrV	171306	172915	neuron_readCounts:293;intestine_readCounts:29;neuron_PSI:0.255;intestine_PSI:0.028	950	+	171306	172915	0	2	50,50	0,1559
chrI	180415	180649	neuron_readCounts:88;intestine_readCounts:64;neuron_PSI:0.702;intestine_PSI:0.276	950	+	180415	180649	0	2	50,50	0,184
chrI	178570	180649	neuron_readCounts:28;intestine_readCounts:93;neuron_PSI:0.298;intestine_PSI:0.724	950	+	178570	180649	0	2	50,50	0,2029
chrIV	139446	139600	neuron_readCounts:200;intestine_readCounts:72;neuron_PSI:0.758;intestine_PSI:0.443	950	-	139446	139600	0	2	50,50	0,104
chrIV	139446	139779	neuron_readCounts:21;intestine_readCounts:68;neuron_PSI:0.173;intestine_PSI:0.541	950	-	139446	139779	0	2	50,50	0,283
chrIV	139545	140428	neuron_readCounts:63;intestine_readCounts:4;neuron_PSI:0.342;intestine_PSI:0.039	950	-	139545	140428	0	2	50,50	0,833
chrIV	139545	139779	neuron_readCounts:97;intestine_readCounts:90;neuron_PSI:0.551;intestine_PSI:0.939	950	-	139545	139779	0	2	50,50	0,184
chrIV	186381	189535	neuron_readCounts:444;intestine_readCounts:52;neuron_PSI:0.851;intestine_PSI:0.403	950	+	186381	189535	0	2	50,50	0,3104
chrIV	184659	189535	neuron_readCounts:61;intestine_readCounts:94;neuron_PSI:0.149;intestine_PSI:0.597	950	+	184659	189535	0	2	50,50	0,4826
chrIV	142245	143806	neuron_readCounts:39;intestine_readCounts:4;neuron_PSI:0.46;intestine_PSI:0.061	950	-	142245	143806	0	2	50,50	0,1511
chrIV	142608	143806	neuron_readCounts:11;intestine_readCounts:59;neuron_PSI:0.151;intestine_PSI:0.908	950	-	142608	143806	0	2	50,50	0,1148
chrIV	143268	143806	neuron_readCounts:33;intestine_readCounts:2;neuron_PSI:0.389;intestine_PSI:0.031	950	-	143268	143806	0	2	50,50	0,488
chrV	208102	208503	neuron_readCounts:935;intestine_readCounts:3150;neuron_PSI:0.28;intestine_PSI:0.856	950	+	208102	208503	0	2	50,50	0,351
chrV	208102	208252	neuron_readCounts:2658;intestine_readCounts:454;neuron_PSI:0.72;intestine_PSI:0.144	950	+	208102	208252	0	2	50,50	0,100
chrIV	140400	140592	neuron_readCounts:92;intestine_readCounts:22;neuron_PSI:0.523;intestine_PSI:0.166	950	-	140400	140592	0	2	50,50	0,142
chrIV	139446	140592	neuron_readCounts:23;intestine_readCounts:2;neuron_PSI:0.096;intestine_PSI:0.015	950	-	139446	140592	0	2	50,50	0,1096
chrIV	139545	140592	neuron_readCounts:21;intestine_readCounts:2;neuron_PSI:0.1;intestine_PSI:0.015	950	-	139545	140592	0	2	50,50	0,997
chrIV	140250	140592	neuron_readCounts:33;intestine_readCounts:108;neuron_PSI:0.281;intestine_PSI:0.804	950	-	140250	140592	0	2	50,50	0,292
chrI	286370	287558	neuron_readCounts:297;intestine_readCounts:281;neuron_PSI:0.471;intestine_PSI:0.686	950	-	286370	287558	0	2	50,50	0,1138
chrI	286947	287558	neuron_readCounts:311;intestine_readCounts:128;neuron_PSI:0.529;intestine_PSI:0.314	950	-	286947	287558	0	2	50,50	0,561
chrIII	347859	348094	neuron_readCounts:144;intestine_readCounts:228;neuron_PSI:0.167;intestine_PSI:0.86	950	-	347859	348094	0	2	50,50	0,185
chrIII	347387	348094	neuron_readCounts:765;intestine_readCounts:27;neuron_PSI:0.833;intestine_PSI:0.14	950	-	347387	348094	0	2	50,50	0,657
chrIII	347387	347890	neuron_readCounts:145;intestine_readCounts:275;neuron_PSI:0.16;intestine_PSI:0.897	950	-	347387	347890	0	2	50,50	0,453
chrX	704047	704374	neuron_readCounts:199;intestine_readCounts:41;neuron_PSI:0.554;intestine_PSI:0.838	950	-	704047	704374	0	2	50,50	0,277
chrX	704047	704365	neuron_readCounts:252;intestine_readCounts:8;neuron_PSI:0.446;intestine_PSI:0.162	950	-	704047	704365	0	2	50,50	0,268
chrIV	885371	886491	neuron_readCounts:119;intestine_readCounts:15;neuron_PSI:0.536;intestine_PSI:0.099	950	+	885371	886491	0	2	50,50	0,1070
chrIV	885371	886545	neuron_readCounts:90;intestine_readCounts:101;neuron_PSI:0.464;intestine_PSI:0.901	950	+	885371	886545	0	2	50,50	0,1124
chrIII	592093	593976	neuron_readCounts:63;intestine_readCounts:128;neuron_PSI:0.097;intestine_PSI:0.547	950	-	592093	593976	0	2	50,50	0,1833
chrIII	593545	593976	neuron_readCounts:655;intestine_readCounts:98;neuron_PSI:0.903;intestine_PSI:0.453	950	-	593545	593976	0	2	50,50	0,381
chrIII	592093	593420	neuron_readCounts:612;intestine_readCounts:102;neuron_PSI:0.908;intestine_PSI:0.444	950	-	592093	593420	0	2	50,50	0,1277
chrIII	594073	595298	neuron_readCounts:162;intestine_readCounts:134;neuron_PSI:0.461;intestine_PSI:0.962	950	-	594073	595298	0	2	50,50	0,1175
chrIII	594073	596695	neuron_readCounts:190;intestine_readCounts:5;neuron_PSI:0.539;intestine_PSI:0.038	950	-	594073	596695	0	2	50,50	0,2572
chrIII	649490	653303	neuron_readCounts:330;intestine_readCounts:181;neuron_PSI:0.765;intestine_PSI:0.273	950	+	649490	653303	0	2	50,50	0,3763
chrIII	653133	653303	neuron_readCounts:106;intestine_readCounts:574;neuron_PSI:0.235;intestine_PSI:0.727	950	+	653133	653303	0	2	50,50	0,120
chrIV	751238	751632	neuron_readCounts:645;intestine_readCounts:68;neuron_PSI:0.943;intestine_PSI:0.433	950	+	751238	751632	0	2	50,50	0,344
chrIV	751238	751430	neuron_readCounts:36;intestine_readCounts:73;neuron_PSI:0.057;intestine_PSI:0.567	950	+	751238	751430	0	2	50,50	0,142
chrIV	751384	751632	neuron_readCounts:62;intestine_readCounts:97;neuron_PSI:0.087;intestine_PSI:0.634	950	+	751384	751632	0	2	50,50	0,198
chrX	751554	753147	neuron_readCounts:4101;intestine_readCounts:88;neuron_PSI:0.973;intestine_PSI:0.478	950	-	751554	753147	0	2	50,50	0,1543
chrX	752908	753147	neuron_readCounts:98;intestine_readCounts:93;neuron_PSI:0.027;intestine_PSI:0.522	950	-	752908	753147	0	2	50,50	0,189
chrIII	770460	770644	neuron_readCounts:3764;intestine_readCounts:374;neuron_PSI:0.559;intestine_PSI:0.923	950	+	770460	770644	0	2	50,50	0,134
chrIII	770460	771034	neuron_readCounts:1741;intestine_readCounts:17;neuron_PSI:0.275;intestine_PSI:0.04	950	+	770460	771034	0	2	50,50	0,524
chrIII	770460	771045	neuron_readCounts:1102;intestine_readCounts:15;neuron_PSI:0.165;intestine_PSI:0.037	950	+	770460	771045	0	2	50,50	0,535
chrX	579337	580938	neuron_readCounts:33;intestine_readCounts:34;neuron_PSI:0.084;intestine_PSI:0.09	950	-	579337	580938	0	2	50,50	0,1551
chrX	579337	580347	neuron_readCounts:296;intestine_readCounts:30;neuron_PSI:0.711;intestine_PSI:0.08	950	-	579337	580347	0	2	50,50	0,960
chrX	579337	579547	neuron_readCounts:5;intestine_readCounts:22;neuron_PSI:0.029;intestine_PSI:0.061	950	-	579337	579547	0	2	50,50	0,160
chrX	579337	580037	neuron_readCounts:57;intestine_readCounts:171;neuron_PSI:0.175;intestine_PSI:0.77	950	-	579337	580037	0	2	50,50	0,650
chrX	580093	581679	neuron_readCounts:45;intestine_readCounts:125;neuron_PSI:0.195;intestine_PSI:0.753	950	-	580093	581679	0	2	50,50	0,1536
chrX	579337	581679	neuron_readCounts:14;intestine_readCounts:12;neuron_PSI:0.06;intestine_PSI:0.053	950	-	579337	581679	0	2	50,50	0,2292
chrX	580403	581679	neuron_readCounts:177;intestine_readCounts:33;neuron_PSI:0.656;intestine_PSI:0.117	950	-	580403	581679	0	2	50,50	0,1226
chrX	580994	581679	neuron_readCounts:23;intestine_readCounts:20;neuron_PSI:0.089;intestine_PSI:0.077	950	-	580994	581679	0	2	50,50	0,635
chrX	969329	970088	neuron_readCounts:125;intestine_readCounts:230;neuron_PSI:0.671;intestine_PSI:0.984	950	-	969329	970088	0	2	50,50	0,709
chrX	969329	971014	neuron_readCounts:39;intestine_readCounts:4;neuron_PSI:0.329;intestine_PSI:0.016	950	-	969329	971014	0	2	50,50	0,1635
chrI	1051975	1052123	neuron_readCounts:12;intestine_readCounts:43;neuron_PSI:0.005;intestine_PSI:0.076	950	-	1051975	1052123	0	2	50,50	0,98
chrI	1051975	1052618	neuron_readCounts:2044;intestine_readCounts:65;neuron_PSI:0.939;intestine_PSI:0.142	950	-	1051975	1052618	0	2	50,50	0,593
chrI	1051975	1052141	neuron_readCounts:76;intestine_readCounts:455;neuron_PSI:0.056;intestine_PSI:0.782	950	-	1051975	1052141	0	2	50,50	0,116
chrV	1116473	1122094	neuron_readCounts:112;intestine_readCounts:5;neuron_PSI:0.45;intestine_PSI:0.052	950	+	1116473	1122094	0	2	50,50	0,5571
chrV	1113091	1122094	neuron_readCounts:147;intestine_readCounts:87;neuron_PSI:0.55;intestine_PSI:0.948	950	+	1113091	1122094	0	2	50,50	0,8953
chrIII	1704870	1705453	neuron_readCounts:128;intestine_readCounts:91;neuron_PSI:0.698;intestine_PSI:0.977	950	-	1704870	1705453	0	2	50,50	0,533
chrIII	1704490	1705453	neuron_readCounts:59;intestine_readCounts:2;neuron_PSI:0.302;intestine_PSI:0.023	950	-	1704490	1705453	0	2	50,50	0,913
chrX	1174557	1175218	neuron_readCounts:433;intestine_readCounts:61;neuron_PSI:0.411;intestine_PSI:0.887	950	+	1174557	1175218	0	2	50,50	0,611
chrX	1174557	1174935	neuron_readCounts:692;intestine_readCounts:10;neuron_PSI:0.589;intestine_PSI:0.113	950	+	1174557	1174935	0	2	50,50	0,328
chrX	1175003	1175218	neuron_readCounts:754;intestine_readCounts:17;neuron_PSI:0.617;intestine_PSI:0.163	950	+	1175003	1175218	0	2	50,50	0,165
chrV	1226057	1227007	neuron_readCounts:280;intestine_readCounts:166;neuron_PSI:0.288;intestine_PSI:0.911	950	-	1226057	1227007	0	2	50,50	0,900
chrV	1226830	1227007	neuron_readCounts:56;intestine_readCounts:2;neuron_PSI:0.06;intestine_PSI:0.024	950	-	1226830	1227007	0	2	50,50	0,127
chrV	1226833	1227007	neuron_readCounts:637;intestine_readCounts:15;neuron_PSI:0.651;intestine_PSI:0.065	950	-	1226833	1227007	0	2	50,50	0,124
chrV	1226057	1226891	neuron_readCounts:859;intestine_readCounts:16;neuron_PSI:0.752;intestine_PSI:0.069	950	-	1226057	1226891	0	2	50,50	0,784
chrV	1475091	1476931	neuron_readCounts:2395;intestine_readCounts:3890;neuron_PSI:0.249;intestine_PSI:0.636	950	+	1475091	1476931	0	2	50,50	0,1790
chrV	1475091	1475361	neuron_readCounts:6973;intestine_readCounts:2519;neuron_PSI:0.751;intestine_PSI:0.364	950	+	1475091	1475361	0	2	50,50	0,220
chrI	1586289	1588686	neuron_readCounts:189;intestine_readCounts:59;neuron_PSI:0.899;intestine_PSI:0.439	950	+	1586289	1588686	0	2	50,50	0,2347
chrI	1588401	1588686	neuron_readCounts:20;intestine_readCounts:88;neuron_PSI:0.101;intestine_PSI:0.561	950	+	1588401	1588686	0	2	50,50	0,235
chrX	2509811	2509976	neuron_readCounts:123;intestine_readCounts:111;neuron_PSI:0.086;intestine_PSI:0.555	950	-	2509811	2509976	0	2	50,50	0,115
chrX	2509820	2509976	neuron_readCounts:1459;intestine_readCounts:58;neuron_PSI:0.881;intestine_PSI:0.255	950	-	2509820	2509976	0	2	50,50	0,106
chrX	2509811	2510026	neuron_readCounts:29;intestine_readCounts:40;neuron_PSI:0.032;intestine_PSI:0.189	950	-	2509811	2510026	0	2	50,50	0,165
chrIV	2875291	2879311	neuron_readCounts:364;intestine_readCounts:5;neuron_PSI:0.219;intestine_PSI:0.008	950	-	2875291	2879311	0	2	50,50	0,3970
chrIV	2875333	2879311	neuron_readCounts:1291;intestine_readCounts:539;neuron_PSI:0.781;intestine_PSI:0.992	950	-	2875333	2879311	0	2	50,50	0,3928
chrIII	1932324	1933247	neuron_readCounts:323;intestine_readCounts:11;neuron_PSI:0.758;intestine_PSI:0.084	950	+	1932324	1933247	0	2	50,50	0,873
chrIII	1932324	1934233	neuron_readCounts:103;intestine_readCounts:94;neuron_PSI:0.242;intestine_PSI:0.916	950	+	1932324	1934233	0	2	50,50	0,1859
chrIII	1933252	1934233	neuron_readCounts:454;intestine_readCounts:28;neuron_PSI:0.816;intestine_PSI:0.211	950	+	1933252	1934233	0	2	50,50	0,931
chrIII	2011061	2011310	neuron_readCounts:827;intestine_readCounts:18;neuron_PSI:0.709;intestine_PSI:0.21	950	-	2011061	2011310	0	2	50,50	0,199
chrIII	2010693	2011310	neuron_readCounts:388;intestine_readCounts:51;neuron_PSI:0.291;intestine_PSI:0.79	950	-	2010693	2011310	0	2	50,50	0,567
chrX	2068702	2069739	neuron_readCounts:51;intestine_readCounts:6;neuron_PSI:0.445;intestine_PSI:0.025	950	-	2068702	2069739	0	2	50,50	0,987
chrX	2069538	2069739	neuron_readCounts:62;intestine_readCounts:203;neuron_PSI:0.555;intestine_PSI:0.975	950	-	2069538	2069739	0	2	50,50	0,151
chrX	2068702	2069575	neuron_readCounts:67;intestine_readCounts:199;neuron_PSI:0.6;intestine_PSI:0.969	950	-	2068702	2069575	0	2	50,50	0,823
chrIII	3226796	3227047	neuron_readCounts:55;intestine_readCounts:50;neuron_PSI:0.802;intestine_PSI:0.533	950	+	3226796	3227047	0	2	50,50	0,201
chrIII	3226753	3227047	neuron_readCounts:2;intestine_readCounts:12;neuron_PSI:0.035;intestine_PSI:0.09	950	+	3226753	3227047	0	2	50,50	0,244
chrIII	3226775	3227047	neuron_readCounts:9;intestine_readCounts:44;neuron_PSI:0.164;intestine_PSI:0.376	950	+	3226775	3227047	0	2	50,50	0,222
chrII	3507559	3508519	neuron_readCounts:70;intestine_readCounts:120;neuron_PSI:0.253;intestine_PSI:0.548	950	+	3507559	3508519	0	2	50,50	0,910
chrII	3507559	3508525	neuron_readCounts:205;intestine_readCounts:105;neuron_PSI:0.747;intestine_PSI:0.452	950	+	3507559	3508525	0	2	50,50	0,916
chrI	3733653	3734482	neuron_readCounts:1374;intestine_readCounts:53;neuron_PSI:0.602;intestine_PSI:0.023	950	-	3733653	3734482	0	2	50,50	0,779
chrI	3733653	3734389	neuron_readCounts:911;intestine_readCounts:2209;neuron_PSI:0.398;intestine_PSI:0.977	950	-	3733653	3734389	0	2	50,50	0,686
chrIII	2556628	2556986	neuron_readCounts:251;intestine_readCounts:110;neuron_PSI:0.28;intestine_PSI:0.671	950	+	2556628	2556986	0	2	50,50	0,308
chrIII	2556628	2557672	neuron_readCounts:665;intestine_readCounts:50;neuron_PSI:0.72;intestine_PSI:0.329	950	+	2556628	2557672	0	2	50,50	0,994
chrIII	2556949	2557672	neuron_readCounts:300;intestine_readCounts:123;neuron_PSI:0.316;intestine_PSI:0.685	950	+	2556949	2557672	0	2	50,50	0,673
chrX	2594059	2600855	neuron_readCounts:122;intestine_readCounts:64;neuron_PSI:0.325;intestine_PSI:0.724	950	+	2594059	2600855	0	2	50,50	0,6746
chrX	2599439	2600855	neuron_readCounts:270;intestine_readCounts:25;neuron_PSI:0.675;intestine_PSI:0.276	950	+	2599439	2600855	0	2	50,50	0,1366
chrIII	3990776	3992135	neuron_readCounts:274;intestine_readCounts:83;neuron_PSI:0.171;intestine_PSI:0.8	950	-	3990776	3992135	0	2	50,50	0,1309
chrIII	3990785	3992135	neuron_readCounts:1334;intestine_readCounts:33;neuron_PSI:0.829;intestine_PSI:0.2	950	-	3990785	3992135	0	2	50,50	0,1300
chrIII	2010693	2011093	neuron_readCounts:968;intestine_readCounts:28;neuron_PSI:0.655;intestine_PSI:0.34	950	-	2010693	2011093	0	2	50,50	0,350
chrIII	2010693	2010968	neuron_readCounts:106;intestine_readCounts:4;neuron_PSI:0.077;intestine_PSI:0.047	950	-	2010693	2010968	0	2	50,50	0,225
chrII	4336220	4337122	neuron_readCounts:117;intestine_readCounts:121;neuron_PSI:0.5;intestine_PSI:0.236	950	+	4336220	4337122	0	2	50,50	0,852
chrII	4336220	4337113	neuron_readCounts:104;intestine_readCounts:364;neuron_PSI:0.5;intestine_PSI:0.764	950	+	4336220	4337113	0	2	50,50	0,843
chrIII	4339569	4340067	neuron_readCounts:73;intestine_readCounts:45;neuron_PSI:0.085;intestine_PSI:0.093	950	+	4339569	4340067	0	2	50,50	0,448
chrIII	4339569	4340064	neuron_readCounts:735;intestine_readCounts:277;neuron_PSI:0.794;intestine_PSI:0.557	950	+	4339569	4340064	0	2	50,50	0,445
chrIII	4339569	4340055	neuron_readCounts:120;intestine_readCounts:189;neuron_PSI:0.121;intestine_PSI:0.349	950	+	4339569	4340055	0	2	50,50	0,436
chrI	4468149	4469191	neuron_readCounts:2818;intestine_readCounts:63;neuron_PSI:0.982;intestine_PSI:0.511	950	+	4468149	4469191	0	2	50,50	0,992
chrII	3017057	3017397	neuron_readCounts:65;intestine_readCounts:56;neuron_PSI:0.607;intestine_PSI:0.184	950	+	3017057	3017397	0	2	50,50	0,290
chrII	3017057	3017234	neuron_readCounts:47;intestine_readCounts:338;neuron_PSI:0.393;intestine_PSI:0.816	950	+	3017057	3017234	0	2	50,50	0,127
chrII	3017153	3017397	neuron_readCounts:46;intestine_readCounts:304;neuron_PSI:0.441;intestine_PSI:0.805	950	+	3017153	3017397	0	2	50,50	0,194
chrI	4529091	4529921	neuron_readCounts:162;intestine_readCounts:162;neuron_PSI:0.122;intestine_PSI:0.372	950	-	4529091	4529921	0	2	50,50	0,780
chrI	4529085	4529921	neuron_readCounts:1124;intestine_readCounts:233;neuron_PSI:0.878;intestine_PSI:0.628	950	-	4529085	4529921	0	2	50,50	0,786
chrI	4529959	4530109	neuron_readCounts:205;intestine_readCounts:178;neuron_PSI:0.216;intestine_PSI:0.595	950	-	4529959	4530109	0	2	50,50	0,100
chrI	4529953	4530109	neuron_readCounts:733;intestine_readCounts:135;neuron_PSI:0.784;intestine_PSI:0.405	950	-	4529953	4530109	0	2	50,50	0,106
chrX	3038975	3042036	neuron_readCounts:269;intestine_readCounts:138;neuron_PSI:0.505;intestine_PSI:0.89	950	-	3038975	3042036	0	2	50,50	0,3011
chrX	3038975	3040460	neuron_readCounts:190;intestine_readCounts:17;neuron_PSI:0.495;intestine_PSI:0.11	950	-	3038975	3040460	0	2	50,50	0,1435
chrIII	4580735	4580880	neuron_readCounts:96;intestine_readCounts:86;neuron_PSI:0.138;intestine_PSI:0.355	950	+	4580735	4580880	0	2	50,50	0,95
chrIII	4580735	4580889	neuron_readCounts:511;intestine_readCounts:140;neuron_PSI:0.862;intestine_PSI:0.645	950	+	4580735	4580889	0	2	50,50	0,104
chrIII	3063059	3064010	neuron_readCounts:85;intestine_readCounts:824;neuron_PSI:0.09;intestine_PSI:0.742	950	-	3063059	3064010	0	2	50,50	0,901
chrIII	3062835	3064010	neuron_readCounts:794;intestine_readCounts:278;neuron_PSI:0.91;intestine_PSI:0.258	950	-	3062835	3064010	0	2	50,50	0,1125
chrIII	3062835	3063057	neuron_readCounts:60;intestine_readCounts:685;neuron_PSI:0.088;intestine_PSI:0.706	950	-	3062835	3063057	0	2	50,50	0,172
chrI	3075202	3076613	neuron_readCounts:76;intestine_readCounts:30;neuron_PSI:0.061;intestine_PSI:0.065	950	-	3075202	3076613	0	2	50,50	0,1361
chrI	3072922	3076613	neuron_readCounts:326;intestine_readCounts:222;neuron_PSI:0.235;intestine_PSI:0.473	950	-	3072922	3076613	0	2	50,50	0,3641
chrI	3075217	3076613	neuron_readCounts:935;intestine_readCounts:209;neuron_PSI:0.704;intestine_PSI:0.462	950	-	3075217	3076613	0	2	50,50	0,1346
chrX	3109638	3109991	neuron_readCounts:36;intestine_readCounts:70;neuron_PSI:0.11;intestine_PSI:0.902	950	-	3109638	3109991	0	2	50,50	0,303
chrX	3109831	3109991	neuron_readCounts:281;intestine_readCounts:7;neuron_PSI:0.89;intestine_PSI:0.098	950	-	3109831	3109991	0	2	50,50	0,110
chrX	3109638	3109853	neuron_readCounts:372;intestine_readCounts:10;neuron_PSI:0.905;intestine_PSI:0.13	950	-	3109638	3109853	0	2	50,50	0,165
chrIV	3105254	3110032	neuron_readCounts:4490;intestine_readCounts:854;neuron_PSI:0.784;intestine_PSI:0.467	950	-	3105254	3110032	0	2	50,50	0,4728
chrIV	3105254	3116671	neuron_readCounts:977;intestine_readCounts:1031;neuron_PSI:0.216;intestine_PSI:0.533	950	-	3105254	3116671	0	2	50,50	0,11367
chrI	4676596	4677719	neuron_readCounts:358;intestine_readCounts:241;neuron_PSI:0.08;intestine_PSI:0.371	950	+	4676596	4677719	0	2	50,50	0,1073
chrI	4676596	4677725	neuron_readCounts:3913;intestine_readCounts:343;neuron_PSI:0.92;intestine_PSI:0.629	950	+	4676596	4677725	0	2	50,50	0,1079
chrI	4677674	4678617	neuron_readCounts:460;intestine_readCounts:234;neuron_PSI:0.095;intestine_PSI:0.312	950	+	4677674	4678617	0	2	50,50	0,893
chrI	4677674	4678623	neuron_readCounts:4164;intestine_readCounts:432;neuron_PSI:0.905;intestine_PSI:0.688	950	+	4677674	4678623	0	2	50,50	0,899
chrIII	4775064	4775235	neuron_readCounts:67;intestine_readCounts:5;neuron_PSI:0.29;intestine_PSI:0.01	950	+	4775064	4775235	0	2	50,50	0,121
chrIII	4774167	4775235	neuron_readCounts:147;intestine_readCounts:444;neuron_PSI:0.71;intestine_PSI:0.99	950	+	4774167	4775235	0	2	50,50	0,1018
chrX	3539773	3539945	neuron_readCounts:211;intestine_readCounts:172;neuron_PSI:0.131;intestine_PSI:0.92	950	+	3539773	3539945	0	2	50,50	0,122
chrX	3539902	3540552	neuron_readCounts:2033;intestine_readCounts:190;neuron_PSI:0.633;intestine_PSI:0.194	950	+	3539902	3540552	0	2	50,50	0,600
chrIV	5372517	5372735	neuron_readCounts:361;intestine_readCounts:54;neuron_PSI:0.869;intestine_PSI:0.455	950	+	5372517	5372735	0	2	50,50	0,168
chrIV	5372517	5372723	neuron_readCounts:59;intestine_readCounts:50;neuron_PSI:0.131;intestine_PSI:0.545	950	+	5372517	5372723	0	2	50,50	0,156
chrV	3692008	3696020	neuron_readCounts:110;intestine_readCounts:7;neuron_PSI:0.31;intestine_PSI:0.065	950	+	3692008	3696020	0	2	50,50	0,3962
chrV	3692008	3697501	neuron_readCounts:248;intestine_readCounts:87;neuron_PSI:0.69;intestine_PSI:0.935	950	+	3692008	3697501	0	2	50,50	0,5443
chrV	3710958	3712402	neuron_readCounts:147;intestine_readCounts:319;neuron_PSI:0.041;intestine_PSI:0.286	950	+	3710958	3712402	0	2	50,50	0,1394
chrV	3710068	3712402	neuron_readCounts:3311;intestine_readCounts:732;neuron_PSI:0.959;intestine_PSI:0.714	950	+	3710068	3712402	0	2	50,50	0,2284
chrX	5587748	5590526	neuron_readCounts:412;intestine_readCounts:8;neuron_PSI:0.316;intestine_PSI:0.09	950	+	5587748	5590526	0	2	50,50	0,2728
chrX	5590277	5590526	neuron_readCounts:690;intestine_readCounts:78;neuron_PSI:0.684;intestine_PSI:0.91	950	+	5590277	5590526	0	2	50,50	0,199
chrX	3801184	3801414	neuron_readCounts:1827;intestine_readCounts:467;neuron_PSI:0.148;intestine_PSI:0.767	950	-	3801184	3801414	0	2	50,50	0,180
chrX	3800641	3801414	neuron_readCounts:9461;intestine_readCounts:117;neuron_PSI:0.852;intestine_PSI:0.233	950	-	3800641	3801414	0	2	50,50	0,723
chrX	3801557	3801914	neuron_readCounts:101;intestine_readCounts:154;neuron_PSI:0.02;intestine_PSI:0.756	950	-	3801557	3801914	0	2	50,50	0,307
chrX	3801736	3801914	neuron_readCounts:4935;intestine_readCounts:69;neuron_PSI:0.98;intestine_PSI:0.244	950	-	3801736	3801914	0	2	50,50	0,128
chrX	3801557	3801797	neuron_readCounts:5129;intestine_readCounts:82;neuron_PSI:0.981;intestine_PSI:0.36	950	-	3801557	3801797	0	2	50,50	0,190
chrIII	3871584	3873024	neuron_readCounts:21;intestine_readCounts:55;neuron_PSI:0.082;intestine_PSI:0.711	950	-	3871584	3873024	0	2	50,50	0,1390
chrIII	3871584	3880165	neuron_readCounts:235;intestine_readCounts:36;neuron_PSI:0.918;intestine_PSI:0.289	950	-	3871584	3880165	0	2	50,50	0,8531
chrV	5918564	5918775	neuron_readCounts:78;intestine_readCounts:25;neuron_PSI:0.686;intestine_PSI:0.192	950	-	5918564	5918775	0	2	50,50	0,161
chrV	5918564	5918838	neuron_readCounts:35;intestine_readCounts:102;neuron_PSI:0.314;intestine_PSI:0.808	950	-	5918564	5918838	0	2	50,50	0,224
chrV	5919468	5919634	neuron_readCounts:29;intestine_readCounts:69;neuron_PSI:0.414;intestine_PSI:0.897	950	-	5919468	5919634	0	2	50,50	0,116
chrV	5919495	5919646	neuron_readCounts:44;intestine_readCounts:10;neuron_PSI:0.586;intestine_PSI:0.103	950	-	5919495	5919646	0	2	50,50	0,101
chrI	4015726	4015990	neuron_readCounts:117;intestine_readCounts:90;neuron_PSI:0.302;intestine_PSI:0.812	950	-	4015726	4015990	0	2	50,50	0,214
chrI	4010802	4015990	neuron_readCounts:244;intestine_readCounts:21;neuron_PSI:0.698;intestine_PSI:0.188	950	-	4010802	4015990	0	2	50,50	0,5138
chrII	6023752	6024043	neuron_readCounts:339;intestine_readCounts:2720;neuron_PSI:0.541;intestine_PSI:0.979	950	-	6023752	6024043	0	2	50,50	0,241
chrII	6023752	6024058	neuron_readCounts:380;intestine_readCounts:25;neuron_PSI:0.459;intestine_PSI:0.021	950	-	6023752	6024058	0	2	50,50	0,256
chrI	4016921	4021278	neuron_readCounts:197;intestine_readCounts:127;neuron_PSI:0.736;intestine_PSI:0.949	950	-	4016921	4021278	0	2	50,50	0,4307
chrI	4016921	4017373	neuron_readCounts:71;intestine_readCounts:6;neuron_PSI:0.264;intestine_PSI:0.051	950	-	4016921	4017373	0	2	50,50	0,402
chrIV	4027013	4027956	neuron_readCounts:44;intestine_readCounts:119;neuron_PSI:0.161;intestine_PSI:0.868	950	-	4027013	4027956	0	2	50,50	0,893
chrIV	4027013	4034807	neuron_readCounts:227;intestine_readCounts:18;neuron_PSI:0.839;intestine_PSI:0.132	950	-	4027013	4034807	0	2	50,50	0,7744
chrIII	6057989	6058139	neuron_readCounts:137;intestine_readCounts:4;neuron_PSI:0.26;intestine_PSI:0.003	950	+	6057989	6058139	0	2	50,50	0,100
chrIII	6057381	6058139	neuron_readCounts:490;intestine_readCounts:1192;neuron_PSI:0.74;intestine_PSI:0.997	950	+	6057381	6058139	0	2	50,50	0,708
chrIII	6226517	6226891	neuron_readCounts:307;intestine_readCounts:56;neuron_PSI:0.452;intestine_PSI:0.126	950	-	6226517	6226891	0	2	50,50	0,324
chrIII	6226205	6226891	neuron_readCounts:315;intestine_readCounts:367;neuron_PSI:0.548;intestine_PSI:0.874	950	-	6226205	6226891	0	2	50,50	0,636
chrI	6358698	6358841	neuron_readCounts:219;intestine_readCounts:197;neuron_PSI:0.321;intestine_PSI:0.522	950	+	6358698	6358841	0	2	50,50	0,93
chrI	6358698	6358847	neuron_readCounts:364;intestine_readCounts:115;neuron_PSI:0.679;intestine_PSI:0.478	950	+	6358698	6358847	0	2	50,50	0,99
chrX	4330629	4331196	neuron_readCounts:95;intestine_readCounts:7;neuron_PSI:0.656;intestine_PSI:0.034	950	-	4330629	4331196	0	2	50,50	0,517
chrX	4331050	4331196	neuron_readCounts:83;intestine_readCounts:166;neuron_PSI:0.344;intestine_PSI:0.966	950	-	4331050	4331196	0	2	50,50	0,96
chrII	4492070	4492254	neuron_readCounts:2558;intestine_readCounts:98;neuron_PSI:0.852;intestine_PSI:0.084	950	-	4492070	4492254	0	2	50,50	0,134
chrII	4491729	4492254	neuron_readCounts:405;intestine_readCounts:1077;neuron_PSI:0.148;intestine_PSI:0.916	950	-	4491729	4492254	0	2	50,50	0,475
chrII	4491729	4492136	neuron_readCounts:2714;intestine_readCounts:72;neuron_PSI:0.858;intestine_PSI:0.065	950	-	4491729	4492136	0	2	50,50	0,357
chrII	4492775	4493357	neuron_readCounts:91;intestine_readCounts:188;neuron_PSI:0.06;intestine_PSI:0.538	950	-	4492775	4493357	0	2	50,50	0,532
chrII	4492775	4500147	neuron_readCounts:1459;intestine_readCounts:182;neuron_PSI:0.94;intestine_PSI:0.462	950	-	4492775	4500147	0	2	50,50	0,7322
chrV	4497539	4501268	neuron_readCounts:69;intestine_readCounts:51;neuron_PSI:0.208;intestine_PSI:0.593	950	+	4497539	4501268	0	2	50,50	0,3679
chrV	4499757	4501268	neuron_readCounts:269;intestine_readCounts:34;neuron_PSI:0.792;intestine_PSI:0.407	950	+	4499757	4501268	0	2	50,50	0,1461
chrV	4505070	4505878	neuron_readCounts:233;intestine_readCounts:348;neuron_PSI:0.131;intestine_PSI:0.441	950	+	4505070	4505878	0	2	50,50	0,758
chrV	4505466	4505878	neuron_readCounts:1582;intestine_readCounts:434;neuron_PSI:0.869;intestine_PSI:0.559	950	+	4505466	4505878	0	2	50,50	0,362
chrX	4518635	4519570	neuron_readCounts:2362;intestine_readCounts:24;neuron_PSI:0.85;intestine_PSI:0.041	950	-	4518635	4519570	0	2	50,50	0,885
chrX	4519403	4519570	neuron_readCounts:415;intestine_readCounts:414;neuron_PSI:0.15;intestine_PSI:0.959	950	-	4519403	4519570	0	2	50,50	0,117
chrX	4518635	4519401	neuron_readCounts:456;intestine_readCounts:410;neuron_PSI:0.164;intestine_PSI:0.958	950	-	4518635	4519401	0	2	50,50	0,716
chrII	6846437	6846586	neuron_readCounts:795;intestine_readCounts:285;neuron_PSI:0.818;intestine_PSI:0.528	950	+	6846437	6846586	0	2	50,50	0,99
chrII	6846437	6846580	neuron_readCounts:179;intestine_readCounts:232;neuron_PSI:0.182;intestine_PSI:0.472	950	+	6846437	6846580	0	2	50,50	0,93
chrV	4578013	4582755	neuron_readCounts:463;intestine_readCounts:287;neuron_PSI:0.323;intestine_PSI:0.618	950	+	4578013	4582755	0	2	50,50	0,4692
chrV	4578013	4578262	neuron_readCounts:975;intestine_readCounts:177;neuron_PSI:0.677;intestine_PSI:0.382	950	+	4578013	4578262	0	2	50,50	0,199
chrII	4587198	4589058	neuron_readCounts:114;intestine_readCounts:9;neuron_PSI:0.35;intestine_PSI:0.061	950	+	4587198	4589058	0	2	50,50	0,1810
chrII	4588187	4589058	neuron_readCounts:223;intestine_readCounts:135;neuron_PSI:0.65;intestine_PSI:0.939	950	+	4588187	4589058	0	2	50,50	0,821
chrI	4636329	4637588	neuron_readCounts:11;intestine_readCounts:8;neuron_PSI:0.151;intestine_PSI:0.154	950	-	4636329	4637588	0	2	50,50	0,1209
chrI	4636329	4636486	neuron_readCounts:5;intestine_readCounts:36;neuron_PSI:0.086;intestine_PSI:0.549	950	-	4636329	4636486	0	2	50,50	0,107
chrI	4636329	4636777	neuron_readCounts:2;intestine_readCounts:8;neuron_PSI:0.03;intestine_PSI:0.123	950	-	4636329	4636777	0	2	50,50	0,398
chrI	4636329	4637334	neuron_readCounts:51;intestine_readCounts:9;neuron_PSI:0.733;intestine_PSI:0.174	950	-	4636329	4637334	0	2	50,50	0,955
chrV	4644834	4645401	neuron_readCounts:47;intestine_readCounts:6;neuron_PSI:0.29;intestine_PSI:0.022	950	+	4644834	4645401	0	2	50,50	0,517
chrV	4643995	4645401	neuron_readCounts:111;intestine_readCounts:245;neuron_PSI:0.71;intestine_PSI:0.978	950	+	4643995	4645401	0	2	50,50	0,1356
chrX	3539292	3540552	neuron_readCounts:927;intestine_readCounts:863;neuron_PSI:0.423;intestine_PSI:0.918	950	+	3539292	3540552	0	2	50,50	0,1210
chrX	3539292	3539945	neuron_readCounts:1408;intestine_readCounts:16;neuron_PSI:0.539;intestine_PSI:0.013	950	+	3539292	3539945	0	2	50,50	0,603
chrX	3539292	3539495	neuron_readCounts:78;intestine_readCounts:70;neuron_PSI:0.038;intestine_PSI:0.069	950	+	3539292	3539495	0	2	50,50	0,153
chrX	3556288	3556489	neuron_readCounts:48;intestine_readCounts:148;neuron_PSI:0.133;intestine_PSI:0.525	950	+	3556288	3556489	0	2	50,50	0,151
chrX	3554977	3556489	neuron_readCounts:91;intestine_readCounts:3;neuron_PSI:0.256;intestine_PSI:0.011	950	+	3554977	3556489	0	2	50,50	0,1462
chrX	3552876	3556489	neuron_readCounts:173;intestine_readCounts:124;neuron_PSI:0.488;intestine_PSI:0.438	950	+	3552876	3556489	0	2	50,50	0,3563
chrX	3556055	3556489	neuron_readCounts:43;intestine_readCounts:7;neuron_PSI:0.123;intestine_PSI:0.025	950	+	3556055	3556489	0	2	50,50	0,384
chrIV	4828594	4828800	neuron_readCounts:27;intestine_readCounts:165;neuron_PSI:0.104;intestine_PSI:0.403	950	-	4828594	4828800	0	2	50,50	0,156
chrIV	4828061	4828800	neuron_readCounts:282;intestine_readCounts:294;neuron_PSI:0.896;intestine_PSI:0.597	950	-	4828061	4828800	0	2	50,50	0,689
chrX	4854823	4855201	neuron_readCounts:794;intestine_readCounts:11;neuron_PSI:0.448;intestine_PSI:0.045	950	-	4854823	4855201	0	2	50,50	0,328
chrX	4855005	4855201	neuron_readCounts:992;intestine_readCounts:398;neuron_PSI:0.552;intestine_PSI:0.955	950	-	4855005	4855201	0	2	50,50	0,146
chrX	4922791	4922979	neuron_readCounts:1486;intestine_readCounts:85;neuron_PSI:0.729;intestine_PSI:0.043	950	-	4922791	4922979	0	2	50,50	0,138
chrX	4922038	4922979	neuron_readCounts:574;intestine_readCounts:2176;neuron_PSI:0.271;intestine_PSI:0.957	950	-	4922038	4922979	0	2	50,50	0,891
chrX	4922038	4922756	neuron_readCounts:2670;intestine_readCounts:109;neuron_PSI:0.807;intestine_PSI:0.054	950	-	4922038	4922756	0	2	50,50	0,668
chrII	4952481	4952696	neuron_readCounts:162;intestine_readCounts:45;neuron_PSI:0.564;intestine_PSI:0.179	950	+	4952481	4952696	0	2	50,50	0,165
chrII	4952342	4952696	neuron_readCounts:139;intestine_readCounts:222;neuron_PSI:0.436;intestine_PSI:0.821	950	+	4952342	4952696	0	2	50,50	0,304
chrIII	5010939	5011522	neuron_readCounts:553;intestine_readCounts:29;neuron_PSI:0.602;intestine_PSI:0.04	950	-	5010939	5011522	0	2	50,50	0,533
chrIII	5010939	5011189	neuron_readCounts:379;intestine_readCounts:500;neuron_PSI:0.398;intestine_PSI:0.96	950	-	5010939	5011189	0	2	50,50	0,200
chrIII	5019485	5019888	neuron_readCounts:79;intestine_readCounts:97;neuron_PSI:0.147;intestine_PSI:0.183	950	+	5019485	5019888	0	2	50,50	0,353
chrIII	5019485	5020243	neuron_readCounts:180;intestine_readCounts:36;neuron_PSI:0.346;intestine_PSI:0.077	950	+	5019485	5020243	0	2	50,50	0,708
chrIII	5019485	5019894	neuron_readCounts:264;intestine_readCounts:357;neuron_PSI:0.506;intestine_PSI:0.739	950	+	5019485	5019894	0	2	50,50	0,359
chrIII	5019884	5020243	neuron_readCounts:361;intestine_readCounts:479;neuron_PSI:0.66;intestine_PSI:0.93	950	+	5019884	5020243	0	2	50,50	0,309
chrV	5060154	5061011	neuron_readCounts:214;intestine_readCounts:19;neuron_PSI:0.939;intestine_PSI:0.298	950	-	5060154	5061011	0	2	50,50	0,807
chrV	5060506	5061011	neuron_readCounts:14;intestine_readCounts:44;neuron_PSI:0.061;intestine_PSI:0.702	950	-	5060506	5061011	0	2	50,50	0,455
chrV	5060154	5060363	neuron_readCounts:22;intestine_readCounts:75;neuron_PSI:0.093;intestine_PSI:0.763	950	-	5060154	5060363	0	2	50,50	0,159
chrI	3800920	3803060	neuron_readCounts:12;intestine_readCounts:19;neuron_PSI:0.012;intestine_PSI:0.1	950	-	3800920	3803060	0	2	50,50	0,2090
chrI	3800229	3803060	neuron_readCounts:150;intestine_readCounts:106;neuron_PSI:0.145;intestine_PSI:0.48	950	-	3800229	3803060	0	2	50,50	0,2781
chrI	3801904	3803060	neuron_readCounts:871;intestine_readCounts:149;neuron_PSI:0.843;intestine_PSI:0.42	950	-	3801904	3803060	0	2	50,50	0,1106
chrI	3800229	3800858	neuron_readCounts:1677;intestine_readCounts:51;neuron_PSI:0.869;intestine_PSI:0.205	950	-	3800229	3800858	0	2	50,50	0,579
chrI	3800229	3801884	neuron_readCounts:103;intestine_readCounts:163;neuron_PSI:0.051;intestine_PSI:0.398	950	-	3800229	3801884	0	2	50,50	0,1605
chrIV	5132186	5144764	neuron_readCounts:101;intestine_readCounts:5;neuron_PSI:0.328;intestine_PSI:0.041	950	-	5132186	5144764	0	2	50,50	0,12528
chrIV	5132186	5133637	neuron_readCounts:204;intestine_readCounts:107;neuron_PSI:0.672;intestine_PSI:0.959	950	-	5132186	5133637	0	2	50,50	0,1401
chrI	3860533	3862009	neuron_readCounts:123;intestine_readCounts:298;neuron_PSI:0.076;intestine_PSI:0.3	950	-	3860533	3862009	0	2	50,50	0,1426
chrI	3860533	3861811	neuron_readCounts:352;intestine_readCounts:201;neuron_PSI:0.222;intestine_PSI:0.208	950	-	3860533	3861811	0	2	50,50	0,1228
chrI	3860533	3862547	neuron_readCounts:693;intestine_readCounts:137;neuron_PSI:0.436;intestine_PSI:0.136	950	-	3860533	3862547	0	2	50,50	0,1964
chrI	3860533	3860691	neuron_readCounts:407;intestine_readCounts:346;neuron_PSI:0.266;intestine_PSI:0.356	950	-	3860533	3860691	0	2	50,50	0,108
chrX	5176960	5177342	neuron_readCounts:497;intestine_readCounts:47;neuron_PSI:0.23;intestine_PSI:0.67	950	+	5176960	5177342	0	2	50,50	0,332
chrX	5176960	5177121	neuron_readCounts:1808;intestine_readCounts:19;neuron_PSI:0.77;intestine_PSI:0.33	950	+	5176960	5177121	0	2	50,50	0,111
chrII	5180569	5180863	neuron_readCounts:802;intestine_readCounts:421;neuron_PSI:0.688;intestine_PSI:0.401	950	-	5180569	5180863	0	2	50,50	0,244
chrII	5180569	5183737	neuron_readCounts:364;intestine_readCounts:630;neuron_PSI:0.312;intestine_PSI:0.599	950	-	5180569	5183737	0	2	50,50	0,3118
chrII	3922013	3924510	neuron_readCounts:635;intestine_readCounts:1672;neuron_PSI:0.18;intestine_PSI:0.501	950	-	3922013	3924510	0	2	50,50	0,2447
chrII	3920336	3924510	neuron_readCounts:2953;intestine_readCounts:1075;neuron_PSI:0.758;intestine_PSI:0.369	950	-	3920336	3924510	0	2	50,50	0,4124
chrII	3920902	3924510	neuron_readCounts:65;intestine_readCounts:202;neuron_PSI:0.013;intestine_PSI:0.062	950	-	3920902	3924510	0	2	50,50	0,3558
chrII	3921753	3924510	neuron_readCounts:251;intestine_readCounts:223;neuron_PSI:0.049;intestine_PSI:0.068	950	-	3921753	3924510	0	2	50,50	0,2707
chrII	5251191	5253485	neuron_readCounts:189;intestine_readCounts:79;neuron_PSI:0.468;intestine_PSI:0.867	950	-	5251191	5253485	0	2	50,50	0,2244
chrII	5253270	5253485	neuron_readCounts:204;intestine_readCounts:7;neuron_PSI:0.532;intestine_PSI:0.133	950	-	5253270	5253485	0	2	50,50	0,165
chrII	5251191	5253313	neuron_readCounts:329;intestine_readCounts:10;neuron_PSI:0.604;intestine_PSI:0.175	950	-	5251191	5253313	0	2	50,50	0,2072
chrV	7975014	7975461	neuron_readCounts:79;intestine_readCounts:111;neuron_PSI:0.137;intestine_PSI:0.337	950	-	7975014	7975461	0	2	50,50	0,397
chrV	7975014	7975482	neuron_readCounts:532;intestine_readCounts:212;neuron_PSI:0.863;intestine_PSI:0.663	950	-	7975014	7975482	0	2	50,50	0,418
chrI	5360747	5363065	neuron_readCounts:927;intestine_readCounts:552;neuron_PSI:0.394;intestine_PSI:0.957	950	+	5360747	5363065	0	2	50,50	0,2268
chrI	5360747	5362117	neuron_readCounts:1432;intestine_readCounts:27;neuron_PSI:0.606;intestine_PSI:0.043	950	+	5360747	5362117	0	2	50,50	0,1320
chrI	5362068	5363065	neuron_readCounts:1441;intestine_readCounts:32;neuron_PSI:0.61;intestine_PSI:0.041	950	+	5362068	5363065	0	2	50,50	0,947
chrI	5376291	5377352	neuron_readCounts:319;intestine_readCounts:82;neuron_PSI:0.689;intestine_PSI:0.166	950	-	5376291	5377352	0	2	50,50	0,1011
chrI	5376291	5384471	neuron_readCounts:140;intestine_readCounts:235;neuron_PSI:0.311;intestine_PSI:0.834	950	-	5376291	5384471	0	2	50,50	0,8130
chrII	8081995	8082147	neuron_readCounts:389;intestine_readCounts:410;neuron_PSI:0.312;intestine_PSI:0.581	950	-	8081995	8082147	0	2	50,50	0,102
chrII	8081989	8082147	neuron_readCounts:679;intestine_readCounts:228;neuron_PSI:0.688;intestine_PSI:0.419	950	-	8081989	8082147	0	2	50,50	0,108
chrIV	8085183	8085802	neuron_readCounts:177;intestine_readCounts:163;neuron_PSI:0.159;intestine_PSI:0.397	950	-	8085183	8085802	0	2	50,50	0,569
chrIV	8085228	8085802	neuron_readCounts:933;intestine_readCounts:249;neuron_PSI:0.841;intestine_PSI:0.603	950	-	8085228	8085802	0	2	50,50	0,524
chrI	5404305	5404570	neuron_readCounts:197;intestine_readCounts:343;neuron_PSI:0.249;intestine_PSI:0.806	950	-	5404305	5404570	0	2	50,50	0,215
chrI	5403915	5404570	neuron_readCounts:578;intestine_readCounts:144;neuron_PSI:0.751;intestine_PSI:0.194	950	-	5403915	5404570	0	2	50,50	0,605
chrI	8112344	8113768	neuron_readCounts:589;intestine_readCounts:113;neuron_PSI:0.691;intestine_PSI:0.954	950	-	8112344	8113768	0	2	50,50	0,1374
chrI	8112323	8113768	neuron_readCounts:270;intestine_readCounts:6;neuron_PSI:0.309;intestine_PSI:0.046	950	-	8112323	8113768	0	2	50,50	0,1395
chrII	5426546	5427623	neuron_readCounts:938;intestine_readCounts:1622;neuron_PSI:0.347;intestine_PSI:0.827	950	-	5426546	5427623	0	2	50,50	0,1027
chrII	5427431	5427623	neuron_readCounts:1736;intestine_readCounts:335;neuron_PSI:0.653;intestine_PSI:0.173	950	-	5427431	5427623	0	2	50,50	0,142
chrII	5426546	5427481	neuron_readCounts:1781;intestine_readCounts:416;neuron_PSI:0.659;intestine_PSI:0.206	950	-	5426546	5427481	0	2	50,50	0,885
chrV	5551632	5551822	neuron_readCounts:381;intestine_readCounts:1170;neuron_PSI:0.525;intestine_PSI:0.788	950	-	5551632	5551822	0	2	50,50	0,140
chrV	5550830	5551822	neuron_readCounts:345;intestine_readCounts:284;neuron_PSI:0.475;intestine_PSI:0.212	950	-	5550830	5551822	0	2	50,50	0,942
chrV	5576644	5577937	neuron_readCounts:9782;intestine_readCounts:238;neuron_PSI:0.783;intestine_PSI:0.22	950	-	5576644	5577937	0	2	50,50	0,1243
chrV	5577211	5577937	neuron_readCounts:2233;intestine_readCounts:845;neuron_PSI:0.217;intestine_PSI:0.78	950	-	5577211	5577937	0	2	50,50	0,676
chrI	5590578	5591600	neuron_readCounts:59;intestine_readCounts:139;neuron_PSI:0.091;intestine_PSI:0.428	950	-	5590578	5591600	0	2	50,50	0,972
chrI	5587878	5591600	neuron_readCounts:594;intestine_readCounts:233;neuron_PSI:0.909;intestine_PSI:0.572	950	-	5587878	5591600	0	2	50,50	0,3672
chrII	5589877	5590842	neuron_readCounts:1257;intestine_readCounts:155;neuron_PSI:0.719;intestine_PSI:0.168	950	-	5589877	5590842	0	2	50,50	0,915
chrII	5590561	5590842	neuron_readCounts:530;intestine_readCounts:826;neuron_PSI:0.281;intestine_PSI:0.832	950	-	5590561	5590842	0	2	50,50	0,231
chrIII	8406056	8406421	neuron_readCounts:273;intestine_readCounts:31;neuron_PSI:0.552;intestine_PSI:0.289	950	+	8406056	8406421	0	2	50,50	0,315
chrIII	8406056	8406415	neuron_readCounts:225;intestine_readCounts:68;neuron_PSI:0.448;intestine_PSI:0.711	950	+	8406056	8406415	0	2	50,50	0,309
chrV	5607317	5607785	neuron_readCounts:733;intestine_readCounts:223;neuron_PSI:0.716;intestine_PSI:0.975	950	+	5607317	5607785	0	2	50,50	0,418
chrV	5607625	5607785	neuron_readCounts:269;intestine_readCounts:5;neuron_PSI:0.284;intestine_PSI:0.025	950	+	5607625	5607785	0	2	50,50	0,110
chrIV	5607943	5608361	neuron_readCounts:143;intestine_readCounts:117;neuron_PSI:0.446;intestine_PSI:0.817	950	+	5607943	5608361	0	2	50,50	0,368
chrIV	5607943	5608418	neuron_readCounts:147;intestine_readCounts:35;neuron_PSI:0.443;intestine_PSI:0.162	950	+	5607943	5608418	0	2	50,50	0,425
chrIV	5607943	5608547	neuron_readCounts:40;intestine_readCounts:3;neuron_PSI:0.111;intestine_PSI:0.021	950	+	5607943	5608547	0	2	50,50	0,554
chrIII	5612968	5613433	neuron_readCounts:173;intestine_readCounts:364;neuron_PSI:0.476;intestine_PSI:0.979	950	+	5612968	5613433	0	2	50,50	0,415
chrIII	5612968	5613194	neuron_readCounts:172;intestine_readCounts:9;neuron_PSI:0.524;intestine_PSI:0.021	950	+	5612968	5613194	0	2	50,50	0,176
chrIII	5613121	5613433	neuron_readCounts:162;intestine_readCounts:11;neuron_PSI:0.509;intestine_PSI:0.025	950	+	5613121	5613433	0	2	50,50	0,262
chrI	8422757	8422909	neuron_readCounts:336;intestine_readCounts:85;neuron_PSI:0.744;intestine_PSI:0.209	950	+	8422757	8422909	0	2	50,50	0,102
chrI	8422757	8422903	neuron_readCounts:120;intestine_readCounts:194;neuron_PSI:0.256;intestine_PSI:0.791	950	+	8422757	8422903	0	2	50,50	0,96
chrV	5619151	5619293	neuron_readCounts:125;intestine_readCounts:119;neuron_PSI:0.486;intestine_PSI:0.958	950	-	5619151	5619293	0	2	50,50	0,92
chrV	5619151	5620020	neuron_readCounts:149;intestine_readCounts:5;neuron_PSI:0.514;intestine_PSI:0.042	950	-	5619151	5620020	0	2	50,50	0,819
chrI	5635349	5635691	neuron_readCounts:1015;intestine_readCounts:48;neuron_PSI:0.616;intestine_PSI:0.076	950	+	5635349	5635691	0	2	50,50	0,292
chrI	5635349	5636766	neuron_readCounts:634;intestine_readCounts:536;neuron_PSI:0.384;intestine_PSI:0.924	950	+	5635349	5636766	0	2	50,50	0,1367
chrX	4330629	4331078	neuron_readCounts:109;intestine_readCounts:135;neuron_PSI:0.261;intestine_PSI:0.942	950	-	4330629	4331078	0	2	50,50	0,399
chrX	4330629	4330964	neuron_readCounts:106;intestine_readCounts:2;neuron_PSI:0.265;intestine_PSI:0.014	950	-	4330629	4330964	0	2	50,50	0,285
chrIII	5890627	5891294	neuron_readCounts:561;intestine_readCounts:15;neuron_PSI:0.735;intestine_PSI:0.032	950	-	5890627	5891294	0	2	50,50	0,617
chrIII	5894080	5895295	neuron_readCounts:177;intestine_readCounts:73;neuron_PSI:0.581;intestine_PSI:0.2	950	-	5894080	5895295	0	2	50,50	0,1165
chrIII	5895424	5895599	neuron_readCounts:136;intestine_readCounts:84;neuron_PSI:0.526;intestine_PSI:0.264	950	-	5895424	5895599	0	2	50,50	0,125
chrIII	5894080	5895599	neuron_readCounts:124;intestine_readCounts:277;neuron_PSI:0.474;intestine_PSI:0.736	950	-	5894080	5895599	0	2	50,50	0,1469
chrII	8967956	8968176	neuron_readCounts:230;intestine_readCounts:60;neuron_PSI:0.789;intestine_PSI:0.263	950	-	8967956	8968176	0	2	50,50	0,170
chrII	8967962	8968176	neuron_readCounts:64;intestine_readCounts:87;neuron_PSI:0.211;intestine_PSI:0.737	950	-	8967962	8968176	0	2	50,50	0,164
chrV	8991133	8991382	neuron_readCounts:174;intestine_readCounts:175;neuron_PSI:0.594;intestine_PSI:0.885	950	+	8991133	8991382	0	2	50,50	0,199
chrV	8991133	8991439	neuron_readCounts:99;intestine_readCounts:22;neuron_PSI:0.406;intestine_PSI:0.115	950	+	8991133	8991439	0	2	50,50	0,256
chrIII	6004591	6005300	neuron_readCounts:3352;intestine_readCounts:174;neuron_PSI:0.748;intestine_PSI:0.255	950	+	6004591	6005300	0	2	50,50	0,659
chrIII	6004591	6004854	neuron_readCounts:1083;intestine_readCounts:495;neuron_PSI:0.252;intestine_PSI:0.745	950	+	6004591	6004854	0	2	50,50	0,213
chrIII	6004898	6005300	neuron_readCounts:1106;intestine_readCounts:528;neuron_PSI:0.256;intestine_PSI:0.732	950	+	6004898	6005300	0	2	50,50	0,352
chrV	4504180	4505024	neuron_readCounts:167;intestine_readCounts:396;neuron_PSI:0.136;intestine_PSI:0.668	950	+	4504180	4505024	0	2	50,50	0,794
chrV	4504180	4504361	neuron_readCounts:91;intestine_readCounts:5;neuron_PSI:0.081;intestine_PSI:0.012	950	+	4504180	4504361	0	2	50,50	0,131
chrV	4504180	4505408	neuron_readCounts:947;intestine_readCounts:161;neuron_PSI:0.784;intestine_PSI:0.32	950	+	4504180	4505408	0	2	50,50	0,1178
chrIV	9086618	9087328	neuron_readCounts:162;intestine_readCounts:174;neuron_PSI:0.742;intestine_PSI:0.538	950	+	9086618	9087328	0	2	50,50	0,660
chrIV	9086618	9087370	neuron_readCounts:42;intestine_readCounts:137;neuron_PSI:0.258;intestine_PSI:0.462	950	+	9086618	9087370	0	2	50,50	0,702
chrI	9102847	9103096	neuron_readCounts:639;intestine_readCounts:376;neuron_PSI:0.367;intestine_PSI:0.766	950	-	9102847	9103096	0	2	50,50	0,199
chrI	9102847	9103048	neuron_readCounts:1093;intestine_readCounts:124;neuron_PSI:0.633;intestine_PSI:0.234	950	-	9102847	9103048	0	2	50,50	0,151
chrIII	6126754	6127087	neuron_readCounts:4365;intestine_readCounts:1566;neuron_PSI:0.74;intestine_PSI:0.952	950	-	6126754	6127087	0	2	50,50	0,283
chrIII	6125596	6127087	neuron_readCounts:1540;intestine_readCounts:81;neuron_PSI:0.26;intestine_PSI:0.048	950	-	6125596	6127087	0	2	50,50	0,1441
chrIII	6130000	6130830	neuron_readCounts:1699;intestine_readCounts:79;neuron_PSI:0.756;intestine_PSI:0.143	950	-	6130000	6130830	0	2	50,50	0,780
chrIII	6130440	6130830	neuron_readCounts:554;intestine_readCounts:293;neuron_PSI:0.244;intestine_PSI:0.857	950	-	6130440	6130830	0	2	50,50	0,340
chrIII	6130000	6130261	neuron_readCounts:714;intestine_readCounts:441;neuron_PSI:0.298;intestine_PSI:0.902	950	-	6130000	6130261	0	2	50,50	0,211
chrIII	6131697	6136164	neuron_readCounts:758;intestine_readCounts:86;neuron_PSI:0.883;intestine_PSI:0.635	950	-	6131697	6136164	0	2	50,50	0,4417
chrIII	6131697	6132827	neuron_readCounts:106;intestine_readCounts:50;neuron_PSI:0.117;intestine_PSI:0.365	950	-	6131697	6132827	0	2	50,50	0,1080
chrIV	9210626	9211300	neuron_readCounts:806;intestine_readCounts:539;neuron_PSI:0.824;intestine_PSI:0.59	950	+	9210626	9211300	0	2	50,50	0,624
chrIV	9210626	9211293	neuron_readCounts:183;intestine_readCounts:418;neuron_PSI:0.176;intestine_PSI:0.41	950	+	9210626	9211293	0	2	50,50	0,617
chrIII	6166414	6166568	neuron_readCounts:798;intestine_readCounts:492;neuron_PSI:0.687;intestine_PSI:0.451	950	-	6166414	6166568	0	2	50,50	0,104
chrIII	6166245	6166568	neuron_readCounts:371;intestine_readCounts:655;neuron_PSI:0.313;intestine_PSI:0.549	950	-	6166245	6166568	0	2	50,50	0,273
chrIII	6166245	6166490	neuron_readCounts:808;intestine_readCounts:504;neuron_PSI:0.689;intestine_PSI:0.455	950	-	6166245	6166490	0	2	50,50	0,195
chrII	6197669	6197855	neuron_readCounts:2615;intestine_readCounts:4493;neuron_PSI:0.498;intestine_PSI:0.965	950	+	6197669	6197855	0	2	50,50	0,136
chrII	6197669	6198076	neuron_readCounts:2981;intestine_readCounts:157;neuron_PSI:0.502;intestine_PSI:0.035	950	+	6197669	6198076	0	2	50,50	0,357
chrII	6197918	6198076	neuron_readCounts:2499;intestine_readCounts:4720;neuron_PSI:0.475;intestine_PSI:0.964	950	+	6197918	6198076	0	2	50,50	0,108
chrIII	9400285	9403124	neuron_readCounts:140;intestine_readCounts:201;neuron_PSI:0.134;intestine_PSI:0.354	950	+	9400285	9403124	0	2	50,50	0,2789
chrIII	9400285	9403130	neuron_readCounts:846;intestine_readCounts:331;neuron_PSI:0.866;intestine_PSI:0.646	950	+	9400285	9403130	0	2	50,50	0,2795
chrX	9563434	9564098	neuron_readCounts:11;intestine_readCounts:6;neuron_PSI:0.046;intestine_PSI:0.054	950	-	9563434	9564098	0	2	50,50	0,614
chrX	9563434	9564609	neuron_readCounts:91;intestine_readCounts:74;neuron_PSI:0.371;intestine_PSI:0.751	950	-	9563434	9564609	0	2	50,50	0,1125
chrX	9563434	9563988	neuron_readCounts:148;intestine_readCounts:18;neuron_PSI:0.583;intestine_PSI:0.196	950	-	9563434	9563988	0	2	50,50	0,504
chrII	9670996	9671305	neuron_readCounts:912;intestine_readCounts:529;neuron_PSI:0.781;intestine_PSI:0.516	950	+	9670996	9671305	0	2	50,50	0,259
chrII	9670996	9671299	neuron_readCounts:376;intestine_readCounts:530;neuron_PSI:0.219;intestine_PSI:0.484	950	+	9670996	9671299	0	2	50,50	0,253
chrX	4854823	4855369	neuron_readCounts:798;intestine_readCounts:41;neuron_PSI:0.297;intestine_PSI:0.082	950	-	4854823	4855369	0	2	50,50	0,496
chrX	4854823	4855015	neuron_readCounts:1181;intestine_readCounts:487;neuron_PSI:0.414;intestine_PSI:0.885	950	-	4854823	4855015	0	2	50,50	0,142
chrII	9749753	9749905	neuron_readCounts:3272;intestine_readCounts:1258;neuron_PSI:0.685;intestine_PSI:0.353	950	+	9749753	9749905	0	2	50,50	0,102
chrII	9749753	9749898	neuron_readCounts:1586;intestine_readCounts:2177;neuron_PSI:0.315;intestine_PSI:0.647	950	+	9749753	9749898	0	2	50,50	0,95
chrV	9779360	9779509	neuron_readCounts:76;intestine_readCounts:15;neuron_PSI:0.464;intestine_PSI:0.226	950	-	9779360	9779509	0	2	50,50	0,99
chrV	9779360	9779505	neuron_readCounts:89;intestine_readCounts:59;neuron_PSI:0.536;intestine_PSI:0.774	950	-	9779360	9779505	0	2	50,50	0,95
chrI	6803145	6803671	neuron_readCounts:48;intestine_readCounts:122;neuron_PSI:0.22;intestine_PSI:0.424	950	+	6803145	6803671	0	2	50,50	0,476
chrI	6801464	6803671	neuron_readCounts:152;intestine_readCounts:163;neuron_PSI:0.78;intestine_PSI:0.576	950	+	6801464	6803671	0	2	50,50	0,2157
chrII	6854215	6855017	neuron_readCounts:249;intestine_readCounts:15;neuron_PSI:0.284;intestine_PSI:0.024	950	-	6854215	6855017	0	2	50,50	0,752
chrII	6854797	6855017	neuron_readCounts:590;intestine_readCounts:746;neuron_PSI:0.716;intestine_PSI:0.976	950	-	6854797	6855017	0	2	50,50	0,170
chrV	6889632	6889854	neuron_readCounts:85;intestine_readCounts:87;neuron_PSI:0.032;intestine_PSI:0.3	950	+	6889632	6889854	0	2	50,50	0,172
chrV	6889260	6889854	neuron_readCounts:2538;intestine_readCounts:204;neuron_PSI:0.968;intestine_PSI:0.7	950	+	6889260	6889854	0	2	50,50	0,544
chrIII	6924829	6925405	neuron_readCounts:727;intestine_readCounts:609;neuron_PSI:0.702;intestine_PSI:0.992	950	-	6924829	6925405	0	2	50,50	0,526
chrIII	6924993	6925405	neuron_readCounts:304;intestine_readCounts:5;neuron_PSI:0.298;intestine_PSI:0.008	950	-	6924993	6925405	0	2	50,50	0,362
chrIII	6924829	6925057	neuron_readCounts:368;intestine_readCounts:4;neuron_PSI:0.339;intestine_PSI:0.006	950	-	6924829	6925057	0	2	50,50	0,178
chrX	10400192	10400526	neuron_readCounts:265;intestine_readCounts:82;neuron_PSI:0.695;intestine_PSI:0.405	950	+	10400192	10400526	0	2	50,50	0,284
chrX	10400210	10400526	neuron_readCounts:120;intestine_readCounts:120;neuron_PSI:0.305;intestine_PSI:0.595	950	+	10400210	10400526	0	2	50,50	0,266
chrII	5205582	5206627	neuron_readCounts:24;intestine_readCounts:13;neuron_PSI:0.089;intestine_PSI:0.071	950	+	5205582	5206627	0	2	50,50	0,995
chrII	5204941	5206627	neuron_readCounts:174;intestine_readCounts:130;neuron_PSI:0.592;intestine_PSI:0.886	950	+	5204941	5206627	0	2	50,50	0,1636
chrII	5205025	5206627	neuron_readCounts:95;intestine_readCounts:6;neuron_PSI:0.318;intestine_PSI:0.043	950	+	5205025	5206627	0	2	50,50	0,1552
chrII	6953979	6954212	neuron_readCounts:648;intestine_readCounts:232;neuron_PSI:0.683;intestine_PSI:0.442	950	+	6953979	6954212	0	2	50,50	0,183
chrII	6953979	6954428	neuron_readCounts:293;intestine_readCounts:284;neuron_PSI:0.317;intestine_PSI:0.558	950	+	6953979	6954428	0	2	50,50	0,399
chrII	6954199	6954428	neuron_readCounts:773;intestine_readCounts:290;neuron_PSI:0.72;intestine_PSI:0.506	950	+	6954199	6954428	0	2	50,50	0,179
chrIV	7085807	7086232	neuron_readCounts:918;intestine_readCounts:195;neuron_PSI:0.463;intestine_PSI:0.129	950	-	7085807	7086232	0	2	50,50	0,375
chrIV	7086049	7086232	neuron_readCounts:1041;intestine_readCounts:1537;neuron_PSI:0.537;intestine_PSI:0.871	950	-	7086049	7086232	0	2	50,50	0,133
chrIV	7085807	7086116	neuron_readCounts:916;intestine_readCounts:1360;neuron_PSI:0.509;intestine_PSI:0.864	950	-	7085807	7086116	0	2	50,50	0,259
chrX	10644500	10645887	neuron_readCounts:68;intestine_readCounts:50;neuron_PSI:0.912;intestine_PSI:0.5	950	+	10644500	10645887	0	2	50,50	0,1337
chrX	10645738	10645887	neuron_readCounts:8;intestine_readCounts:53;neuron_PSI:0.088;intestine_PSI:0.5	950	+	10645738	10645887	0	2	50,50	0,99
chrI	10699747	10701616	neuron_readCounts:254;intestine_readCounts:94;neuron_PSI:0.699;intestine_PSI:0.394	950	-	10699747	10701616	0	2	50,50	0,1819
chrI	10699747	10701691	neuron_readCounts:107;intestine_readCounts:137;neuron_PSI:0.301;intestine_PSI:0.606	950	-	10699747	10701691	0	2	50,50	0,1894
chrX	10796605	10797033	neuron_readCounts:1367;intestine_readCounts:260;neuron_PSI:0.555;intestine_PSI:0.858	950	-	10796605	10797033	0	2	50,50	0,378
chrX	10796605	10796988	neuron_readCounts:1135;intestine_readCounts:46;neuron_PSI:0.445;intestine_PSI:0.142	950	-	10796605	10796988	0	2	50,50	0,333
chrIV	7227567	7227745	neuron_readCounts:3881;intestine_readCounts:32;neuron_PSI:0.823;intestine_PSI:0.028	950	-	7227567	7227745	0	2	50,50	0,128
chrIV	7227457	7227745	neuron_readCounts:576;intestine_readCounts:1059;neuron_PSI:0.177;intestine_PSI:0.972	950	-	7227457	7227745	0	2	50,50	0,238
chrIV	7227457	7227635	neuron_readCounts:2783;intestine_readCounts:25;neuron_PSI:0.634;intestine_PSI:0.023	950	-	7227457	7227635	0	2	50,50	0,128
chrIV	7227457	7227601	neuron_readCounts:711;intestine_readCounts:4;neuron_PSI:0.166;intestine_PSI:0.004	950	-	7227457	7227601	0	2	50,50	0,94
chrX	7292426	7292610	neuron_readCounts:62;intestine_readCounts:8;neuron_PSI:0.322;intestine_PSI:0.022	950	+	7292426	7292610	0	2	50,50	0,134
chrX	7292426	7292893	neuron_readCounts:136;intestine_readCounts:291;neuron_PSI:0.678;intestine_PSI:0.978	950	+	7292426	7292893	0	2	50,50	0,417
chrX	7292651	7292893	neuron_readCounts:58;intestine_readCounts:12;neuron_PSI:0.332;intestine_PSI:0.031	950	+	7292651	7292893	0	2	50,50	0,192
chrIV	11018581	11018722	neuron_readCounts:59;intestine_readCounts:39;neuron_PSI:0.502;intestine_PSI:0.198	950	-	11018581	11018722	0	2	50,50	0,91
chrIV	11018572	11018722	neuron_readCounts:52;intestine_readCounts:93;neuron_PSI:0.498;intestine_PSI:0.802	950	-	11018572	11018722	0	2	50,50	0,100
chrIV	7351210	7351457	neuron_readCounts:390;intestine_readCounts:22;neuron_PSI:0.35;intestine_PSI:0.096	950	-	7351210	7351457	0	2	50,50	0,197
chrIV	7350638	7351457	neuron_readCounts:601;intestine_readCounts:182;neuron_PSI:0.65;intestine_PSI:0.904	950	-	7350638	7351457	0	2	50,50	0,769
chrIII	7355084	7356091	neuron_readCounts:1098;intestine_readCounts:484;neuron_PSI:0.887;intestine_PSI:0.564	950	-	7355084	7356091	0	2	50,50	0,957
chrIII	7354392	7356091	neuron_readCounts:158;intestine_readCounts:386;neuron_PSI:0.113;intestine_PSI:0.436	950	-	7354392	7356091	0	2	50,50	0,1649
chrIII	7354392	7354957	neuron_readCounts:1260;intestine_readCounts:818;neuron_PSI:0.897;intestine_PSI:0.674	950	-	7354392	7354957	0	2	50,50	0,515
chrIV	7416906	7417544	neuron_readCounts:186;intestine_readCounts:8;neuron_PSI:0.316;intestine_PSI:0.061	950	+	7416906	7417544	0	2	50,50	0,588
chrIV	7416906	7417709	neuron_readCounts:401;intestine_readCounts:106;neuron_PSI:0.684;intestine_PSI:0.939	950	+	7416906	7417709	0	2	50,50	0,753
chrIV	7417558	7417709	neuron_readCounts:203;intestine_readCounts:11;neuron_PSI:0.331;intestine_PSI:0.075	950	+	7417558	7417709	0	2	50,50	0,101
chrII	11127921	11128430	neuron_readCounts:263;intestine_readCounts:5;neuron_PSI:0.5;intestine_PSI:0.048	950	+	11127921	11128430	0	2	50,50	0,459
chrII	11127826	11128430	neuron_readCounts:224;intestine_readCounts:82;neuron_PSI:0.473;intestine_PSI:0.87	950	+	11127826	11128430	0	2	50,50	0,554
chrII	11127824	11128430	neuron_readCounts:13;intestine_readCounts:9;neuron_PSI:0.027;intestine_PSI:0.082	950	+	11127824	11128430	0	2	50,50	0,556
chrI	4458599	4463506	neuron_readCounts:6;intestine_readCounts:5;neuron_PSI:0.03;intestine_PSI:0.048	950	+	4458599	4463506	0	2	50,50	0,4857
chrI	4458599	4460154	neuron_readCounts:75;intestine_readCounts:8;neuron_PSI:0.382;intestine_PSI:0.066	950	+	4458599	4460154	0	2	50,50	0,1505
chrI	4458599	4469191	neuron_readCounts:39;intestine_readCounts:70;neuron_PSI:0.202;intestine_PSI:0.737	950	+	4458599	4469191	0	2	50,50	0,10542
chrI	4458599	4465787	neuron_readCounts:71;intestine_readCounts:22;neuron_PSI:0.386;intestine_PSI:0.148	950	+	4458599	4465787	0	2	50,50	0,7138
chrIV	7443061	7443247	neuron_readCounts:103;intestine_readCounts:239;neuron_PSI:0.186;intestine_PSI:0.464	950	+	7443061	7443247	0	2	50,50	0,136
chrIV	7443061	7443569	neuron_readCounts:478;intestine_readCounts:306;neuron_PSI:0.814;intestine_PSI:0.536	950	+	7443061	7443569	0	2	50,50	0,458
chrX	11203241	11203852	neuron_readCounts:130;intestine_readCounts:508;neuron_PSI:0.777;intestine_PSI:0.996	950	-	11203241	11203852	0	2	50,50	0,561
chrX	11203241	11203594	neuron_readCounts:45;intestine_readCounts:2;neuron_PSI:0.223;intestine_PSI:0.004	950	-	11203241	11203594	0	2	50,50	0,303
chrI	5634185	5636766	neuron_readCounts:37;intestine_readCounts:41;neuron_PSI:0.022;intestine_PSI:0.064	950	+	5634185	5636766	0	2	50,50	0,2531
chrI	5635642	5636766	neuron_readCounts:869;intestine_readCounts:71;neuron_PSI:0.572;intestine_PSI:0.105	950	+	5635642	5636766	0	2	50,50	0,1074
chrII	7683477	7684015	neuron_readCounts:307;intestine_readCounts:20;neuron_PSI:0.494;intestine_PSI:0.036	950	+	7683477	7684015	0	2	50,50	0,488
chrII	7683477	7683725	neuron_readCounts:308;intestine_readCounts:407;neuron_PSI:0.506;intestine_PSI:0.964	950	+	7683477	7683725	0	2	50,50	0,198
chrII	7683717	7684015	neuron_readCounts:390;intestine_readCounts:618;neuron_PSI:0.561;intestine_PSI:0.978	950	+	7683717	7684015	0	2	50,50	0,248
chrI	7685971	7686207	neuron_readCounts:613;intestine_readCounts:67;neuron_PSI:0.631;intestine_PSI:0.042	950	-	7685971	7686207	0	2	50,50	0,186
chrI	7685971	7686640	neuron_readCounts:435;intestine_readCounts:1457;neuron_PSI:0.369;intestine_PSI:0.958	950	-	7685971	7686640	0	2	50,50	0,619
chrX	7724068	7724296	neuron_readCounts:489;intestine_readCounts:22;neuron_PSI:0.868;intestine_PSI:0.266	950	+	7724068	7724296	0	2	50,50	0,178
chrX	7724068	7725086	neuron_readCounts:88;intestine_readCounts:44;neuron_PSI:0.132;intestine_PSI:0.734	950	+	7724068	7725086	0	2	50,50	0,968
chrX	7724579	7725086	neuron_readCounts:1385;intestine_readCounts:59;neuron_PSI:0.947;intestine_PSI:0.558	950	+	7724579	7725086	0	2	50,50	0,457
chrX	7790598	7792758	neuron_readCounts:1775;intestine_readCounts:397;neuron_PSI:0.461;intestine_PSI:0.888	950	-	7790598	7792758	0	2	50,50	0,2110
chrX	7790598	7790806	neuron_readCounts:2748;intestine_readCounts:45;neuron_PSI:0.539;intestine_PSI:0.112	950	-	7790598	7790806	0	2	50,50	0,158
chrII	5889657	5890536	neuron_readCounts:155;intestine_readCounts:5;neuron_PSI:0.318;intestine_PSI:0.029	950	+	5889657	5890536	0	2	50,50	0,829
chrII	5884613	5890536	neuron_readCounts:284;intestine_readCounts:58;neuron_PSI:0.588;intestine_PSI:0.288	950	+	5884613	5890536	0	2	50,50	0,5873
chrII	5886446	5890536	neuron_readCounts:48;intestine_readCounts:110;neuron_PSI:0.094;intestine_PSI:0.682	950	+	5886446	5890536	0	2	50,50	0,4040
chrIII	5891218	5891373	neuron_readCounts:687;intestine_readCounts:15;neuron_PSI:0.521;intestine_PSI:0.014	950	-	5891218	5891373	0	2	50,50	0,105
chrIII	5890627	5891373	neuron_readCounts:199;intestine_readCounts:344;neuron_PSI:0.158;intestine_PSI:0.422	950	-	5890627	5891373	0	2	50,50	0,696
chrIII	5889824	5891373	neuron_readCounts:447;intestine_readCounts:481;neuron_PSI:0.321;intestine_PSI:0.565	950	-	5889824	5891373	0	2	50,50	0,1499
chrIV	7886826	7891648	neuron_readCounts:334;intestine_readCounts:275;neuron_PSI:0.472;intestine_PSI:0.978	950	+	7886826	7891648	0	2	50,50	0,4772
chrIV	7891440	7891648	neuron_readCounts:302;intestine_readCounts:6;neuron_PSI:0.528;intestine_PSI:0.022	950	+	7891440	7891648	0	2	50,50	0,158
chrIV	7905878	7906084	neuron_readCounts:263;intestine_readCounts:382;neuron_PSI:0.367;intestine_PSI:0.87	950	+	7905878	7906084	0	2	50,50	0,156
chrIV	7905878	7906832	neuron_readCounts:435;intestine_readCounts:57;neuron_PSI:0.633;intestine_PSI:0.13	950	+	7905878	7906832	0	2	50,50	0,904
chrIV	7906146	7906832	neuron_readCounts:345;intestine_readCounts:458;neuron_PSI:0.415;intestine_PSI:0.889	950	+	7906146	7906832	0	2	50,50	0,636
chrIV	7954700	7954852	neuron_readCounts:11;intestine_readCounts:32;neuron_PSI:0.024;intestine_PSI:0.576	950	-	7954700	7954852	0	2	50,50	0,102
chrIV	7954700	7955617	neuron_readCounts:466;intestine_readCounts:25;neuron_PSI:0.976;intestine_PSI:0.424	950	-	7954700	7955617	0	2	50,50	0,867
chrX	11967356	11969704	neuron_readCounts:153;intestine_readCounts:333;neuron_PSI:0.397;intestine_PSI:0.98	950	+	11967356	11969704	0	2	50,50	0,2298
chrX	11969465	11969704	neuron_readCounts:297;intestine_readCounts:4;neuron_PSI:0.603;intestine_PSI:0.02	950	+	11969465	11969704	0	2	50,50	0,189
chrII	8024547	8025242	neuron_readCounts:174;intestine_readCounts:13;neuron_PSI:0.581;intestine_PSI:0.067	950	-	8024547	8025242	0	2	50,50	0,645
chrII	8025054	8025242	neuron_readCounts:152;intestine_readCounts:138;neuron_PSI:0.419;intestine_PSI:0.933	950	-	8025054	8025242	0	2	50,50	0,138
chrII	8024547	8025025	neuron_readCounts:198;intestine_readCounts:154;neuron_PSI:0.499;intestine_PSI:0.935	950	-	8024547	8025025	0	2	50,50	0,428
chrI	8039131	8039744	neuron_readCounts:117;intestine_readCounts:179;neuron_PSI:0.408;intestine_PSI:0.786	950	-	8039131	8039744	0	2	50,50	0,563
chrI	8039131	8039390	neuron_readCounts:176;intestine_readCounts:59;neuron_PSI:0.592;intestine_PSI:0.214	950	-	8039131	8039390	0	2	50,50	0,209
chrX	6039186	6039475	neuron_readCounts:61;intestine_readCounts:126;neuron_PSI:0.179;intestine_PSI:0.894	950	-	6039186	6039475	0	2	50,50	0,239
chrX	6039186	6044113	neuron_readCounts:284;intestine_readCounts:2;neuron_PSI:0.79;intestine_PSI:0.028	950	-	6039186	6044113	0	2	50,50	0,4877
chrX	6039186	6042018	neuron_readCounts:13;intestine_readCounts:14;neuron_PSI:0.031;intestine_PSI:0.078	950	-	6039186	6042018	0	2	50,50	0,2782
chrII	12107476	12107663	neuron_readCounts:82;intestine_readCounts:23;neuron_PSI:0.595;intestine_PSI:0.264	950	-	12107476	12107663	0	2	50,50	0,137
chrII	12107485	12107663	neuron_readCounts:49;intestine_readCounts:65;neuron_PSI:0.405;intestine_PSI:0.736	950	-	12107485	12107663	0	2	50,50	0,128
chrIV	12431259	12431653	neuron_readCounts:81;intestine_readCounts:529;neuron_PSI:0.37;intestine_PSI:0.869	950	+	12431259	12431653	0	2	50,50	0,344
chrIV	12431131	12431653	neuron_readCounts:121;intestine_readCounts:79;neuron_PSI:0.63;intestine_PSI:0.131	950	+	12431131	12431653	0	2	50,50	0,472
chrX	12506916	12507120	neuron_readCounts:268;intestine_readCounts:31;neuron_PSI:0.727;intestine_PSI:0.3	950	-	12506916	12507120	0	2	50,50	0,154
chrX	12506964	12507120	neuron_readCounts:106;intestine_readCounts:116;neuron_PSI:0.273;intestine_PSI:0.7	950	-	12506964	12507120	0	2	50,50	0,106
chrI	12567326	12568255	neuron_readCounts:1755;intestine_readCounts:70;neuron_PSI:0.725;intestine_PSI:0.082	950	-	12567326	12568255	0	2	50,50	0,879
chrI	12567326	12568234	neuron_readCounts:661;intestine_readCounts:971;neuron_PSI:0.275;intestine_PSI:0.918	950	-	12567326	12568234	0	2	50,50	0,858
chrIII	8486691	8487456	neuron_readCounts:366;intestine_readCounts:392;neuron_PSI:0.443;intestine_PSI:0.975	950	+	8486691	8487456	0	2	50,50	0,715
chrIII	8486691	8487749	neuron_readCounts:449;intestine_readCounts:13;neuron_PSI:0.557;intestine_PSI:0.025	950	+	8486691	8487749	0	2	50,50	0,1008
chrIII	8487470	8487797	neuron_readCounts:90;intestine_readCounts:100;neuron_PSI:0.11;intestine_PSI:0.217	950	+	8487470	8487797	0	2	50,50	0,277
chrIII	8487470	8487749	neuron_readCounts:284;intestine_readCounts:296;neuron_PSI:0.343;intestine_PSI:0.758	950	+	8487470	8487749	0	2	50,50	0,229
chrIV	8561551	8562725	neuron_readCounts:140;intestine_readCounts:71;neuron_PSI:0.429;intestine_PSI:0.931	950	+	8561551	8562725	0	2	50,50	0,1124
chrIV	8561551	8561785	neuron_readCounts:252;intestine_readCounts:6;neuron_PSI:0.571;intestine_PSI:0.069	950	+	8561551	8561785	0	2	50,50	0,184
chrIV	8561749	8562725	neuron_readCounts:214;intestine_readCounts:10;neuron_PSI:0.531;intestine_PSI:0.103	950	+	8561749	8562725	0	2	50,50	0,926
chrIV	8609871	8610433	neuron_readCounts:674;intestine_readCounts:29;neuron_PSI:0.295;intestine_PSI:0.034	950	+	8609871	8610433	0	2	50,50	0,512
chrIV	8609871	8611425	neuron_readCounts:801;intestine_readCounts:1028;neuron_PSI:0.472;intestine_PSI:0.955	950	+	8609871	8611425	0	2	50,50	0,1504
chrIV	8609871	8610388	neuron_readCounts:502;intestine_readCounts:15;neuron_PSI:0.233;intestine_PSI:0.012	950	+	8609871	8610388	0	2	50,50	0,467
chrIV	8610399	8611425	neuron_readCounts:1485;intestine_readCounts:48;neuron_PSI:0.564;intestine_PSI:0.049	950	+	8610399	8611425	0	2	50,50	0,976
chrI	8670170	8670938	neuron_readCounts:862;intestine_readCounts:88;neuron_PSI:0.618;intestine_PSI:0.432	950	-	8670170	8670938	0	2	50,50	0,718
chrI	8670170	8673570	neuron_readCounts:430;intestine_readCounts:117;neuron_PSI:0.382;intestine_PSI:0.568	950	-	8670170	8673570	0	2	50,50	0,3350
chrIII	8707264	8707459	neuron_readCounts:10;intestine_readCounts:46;neuron_PSI:0.11;intestine_PSI:0.316	950	-	8707264	8707459	0	2	50,50	0,145
chrIII	8706930	8707459	neuron_readCounts:77;intestine_readCounts:93;neuron_PSI:0.89;intestine_PSI:0.684	950	-	8706930	8707459	0	2	50,50	0,479
chrI	8707509	8708278	neuron_readCounts:142;intestine_readCounts:374;neuron_PSI:0.048;intestine_PSI:0.642	950	-	8707509	8708278	0	2	50,50	0,719
chrI	8708082	8708278	neuron_readCounts:3214;intestine_readCounts:90;neuron_PSI:0.952;intestine_PSI:0.358	950	-	8708082	8708278	0	2	50,50	0,146
chrI	8707509	8707846	neuron_readCounts:1250;intestine_readCounts:20;neuron_PSI:0.326;intestine_PSI:0.037	950	-	8707509	8707846	0	2	50,50	0,287
chrI	8707509	8708134	neuron_readCounts:2462;intestine_readCounts:85;neuron_PSI:0.632;intestine_PSI:0.342	950	-	8707509	8708134	0	2	50,50	0,575
chrIII	8724694	8725037	neuron_readCounts:2576;intestine_readCounts:1052;neuron_PSI:0.87;intestine_PSI:0.526	950	+	8724694	8725037	0	2	50,50	0,293
chrIII	8724694	8724850	neuron_readCounts:385;intestine_readCounts:909;neuron_PSI:0.13;intestine_PSI:0.474	950	+	8724694	8724850	0	2	50,50	0,106
chrV	8788628	8789511	neuron_readCounts:306;intestine_readCounts:52;neuron_PSI:0.769;intestine_PSI:0.198	950	+	8788628	8789511	0	2	50,50	0,833
chrV	8788628	8789064	neuron_readCounts:90;intestine_readCounts:222;neuron_PSI:0.231;intestine_PSI:0.802	950	+	8788628	8789064	0	2	50,50	0,386
chrV	8789057	8789511	neuron_readCounts:7;intestine_readCounts:20;neuron_PSI:0.021;intestine_PSI:0.266	950	+	8789057	8789511	0	2	50,50	0,404
chrI	8817199	8817657	neuron_readCounts:101;intestine_readCounts:123;neuron_PSI:0.696;intestine_PSI:0.944	950	+	8817199	8817657	0	2	50,50	0,408
chrI	8817199	8817370	neuron_readCounts:42;intestine_readCounts:9;neuron_PSI:0.304;intestine_PSI:0.056	950	+	8817199	8817370	0	2	50,50	0,121
chrI	8820327	8820663	neuron_readCounts:164;intestine_readCounts:7;neuron_PSI:0.282;intestine_PSI:0.007	950	+	8820327	8820663	0	2	50,50	0,286
chrI	8820327	8820493	neuron_readCounts:436;intestine_readCounts:928;neuron_PSI:0.718;intestine_PSI:0.993	950	+	8820327	8820493	0	2	50,50	0,116
chrIII	8909061	8910130	neuron_readCounts:486;intestine_readCounts:1222;neuron_PSI:0.118;intestine_PSI:0.82	950	+	8909061	8910130	0	2	50,50	0,1019
chrIII	8909061	8909282	neuron_readCounts:4909;intestine_readCounts:293;neuron_PSI:0.882;intestine_PSI:0.18	950	+	8909061	8909282	0	2	50,50	0,171
chrIII	8910171	8910383	neuron_readCounts:909;intestine_readCounts:2899;neuron_PSI:0.097;intestine_PSI:0.756	950	+	8910171	8910383	0	2	50,50	0,162
chrIII	8909305	8910383	neuron_readCounts:10708;intestine_readCounts:937;neuron_PSI:0.903;intestine_PSI:0.244	950	+	8909305	8910383	0	2	50,50	0,1028
chrII	13387515	13388517	neuron_readCounts:44;intestine_readCounts:32;neuron_PSI:0.099;intestine_PSI:0.443	950	+	13387515	13388517	0	2	50,50	0,952
chrII	13387515	13388528	neuron_readCounts:379;intestine_readCounts:41;neuron_PSI:0.901;intestine_PSI:0.557	950	+	13387515	13388528	0	2	50,50	0,963
chrX	8998230	8998648	neuron_readCounts:60911;intestine_readCounts:2813;neuron_PSI:0.971;intestine_PSI:0.724	950	+	8998230	8998648	0	2	50,50	0,368
chrX	8998106	8998648	neuron_readCounts:1888;intestine_readCounts:1057;neuron_PSI:0.029;intestine_PSI:0.276	950	+	8998106	8998648	0	2	50,50	0,492
chrIV	9044098	9044743	neuron_readCounts:205;intestine_readCounts:716;neuron_PSI:0.809;intestine_PSI:0.997	950	-	9044098	9044743	0	2	50,50	0,595
chrIV	9044098	9044245	neuron_readCounts:57;intestine_readCounts:2;neuron_PSI:0.191;intestine_PSI:0.003	950	-	9044098	9044245	0	2	50,50	0,97
chrI	9101622	9101887	neuron_readCounts:818;intestine_readCounts:881;neuron_PSI:0.203;intestine_PSI:0.587	950	-	9101622	9101887	0	2	50,50	0,215
chrI	9101183	9101887	neuron_readCounts:2950;intestine_readCounts:628;neuron_PSI:0.797;intestine_PSI:0.413	950	-	9101183	9101887	0	2	50,50	0,654
chrX	9109210	9109967	neuron_readCounts:68;intestine_readCounts:113;neuron_PSI:0.515;intestine_PSI:0.761	950	+	9109210	9109967	0	2	50,50	0,707
chrX	9109210	9109723	neuron_readCounts:67;intestine_readCounts:35;neuron_PSI:0.485;intestine_PSI:0.239	950	+	9109210	9109723	0	2	50,50	0,463
chrX	9109746	9109967	neuron_readCounts:70;intestine_readCounts:29;neuron_PSI:0.49;intestine_PSI:0.141	950	+	9109746	9109967	0	2	50,50	0,171
chrII	9116677	9116874	neuron_readCounts:39;intestine_readCounts:188;neuron_PSI:0.083;intestine_PSI:0.826	950	+	9116677	9116874	0	2	50,50	0,147
chrII	9113352	9116874	neuron_readCounts:482;intestine_readCounts:39;neuron_PSI:0.917;intestine_PSI:0.174	950	+	9113352	9116874	0	2	50,50	0,3472
chrV	9205417	9205692	neuron_readCounts:346;intestine_readCounts:11;neuron_PSI:0.634;intestine_PSI:0.045	950	-	9205417	9205692	0	2	50,50	0,225
chrV	9205151	9205692	neuron_readCounts:112;intestine_readCounts:193;neuron_PSI:0.366;intestine_PSI:0.955	950	-	9205151	9205692	0	2	50,50	0,491
chrV	9205151	9205452	neuron_readCounts:373;intestine_readCounts:35;neuron_PSI:0.64;intestine_PSI:0.166	950	-	9205151	9205452	0	2	50,50	0,251
chrX	13867246	13868081	neuron_readCounts:413;intestine_readCounts:87;neuron_PSI:0.874;intestine_PSI:0.441	950	-	13867246	13868081	0	2	50,50	0,785
chrX	13867246	13867955	neuron_readCounts:63;intestine_readCounts:117;neuron_PSI:0.126;intestine_PSI:0.559	950	-	13867246	13867955	0	2	50,50	0,659
chrI	13873148	13875758	neuron_readCounts:69;intestine_readCounts:11;neuron_PSI:0.783;intestine_PSI:0.189	950	+	13873148	13875758	0	2	50,50	0,2560
chrI	13873148	13875752	neuron_readCounts:16;intestine_readCounts:37;neuron_PSI:0.183;intestine_PSI:0.738	950	+	13873148	13875752	0	2	50,50	0,2554
chrI	13873148	13875761	neuron_readCounts:3;intestine_readCounts:4;neuron_PSI:0.034;intestine_PSI:0.073	950	+	13873148	13875761	0	2	50,50	0,2563
chrIII	6937424	6938456	neuron_readCounts:10;intestine_readCounts:34;neuron_PSI:0.013;intestine_PSI:0.049	950	+	6937424	6938456	0	2	50,50	0,982
chrIII	6937424	6938461	neuron_readCounts:266;intestine_readCounts:461;neuron_PSI:0.312;intestine_PSI:0.67	950	+	6937424	6938461	0	2	50,50	0,987
chrIII	6937424	6937649	neuron_readCounts:403;intestine_readCounts:152;neuron_PSI:0.47;intestine_PSI:0.221	950	+	6937424	6937649	0	2	50,50	0,175
chrIII	6937424	6938958	neuron_readCounts:176;intestine_readCounts:41;neuron_PSI:0.205;intestine_PSI:0.06	950	+	6937424	6938958	0	2	50,50	0,1484
chrII	9259334	9259720	neuron_readCounts:2943;intestine_readCounts:1462;neuron_PSI:0.315;intestine_PSI:0.651	950	-	9259334	9259720	0	2	50,50	0,336
chrII	9259567	9259720	neuron_readCounts:9616;intestine_readCounts:862;neuron_PSI:0.685;intestine_PSI:0.349	950	-	9259567	9259720	0	2	50,50	0,103
chrII	9259334	9259639	neuron_readCounts:10478;intestine_readCounts:1091;neuron_PSI:0.719;intestine_PSI:0.403	950	-	9259334	9259639	0	2	50,50	0,255
chrX	6946604	6947827	neuron_readCounts:302;intestine_readCounts:4;neuron_PSI:0.263;intestine_PSI:0.045	950	-	6946604	6947827	0	2	50,50	0,1173
chrX	6947502	6947827	neuron_readCounts:78;intestine_readCounts:5;neuron_PSI:0.09;intestine_PSI:0.054	950	-	6947502	6947827	0	2	50,50	0,275
chrX	6945910	6947827	neuron_readCounts:700;intestine_readCounts:74;neuron_PSI:0.647;intestine_PSI:0.901	950	-	6945910	6947827	0	2	50,50	0,1867
chrI	9273518	9278567	neuron_readCounts:391;intestine_readCounts:36;neuron_PSI:0.734;intestine_PSI:0.096	950	-	9273518	9278567	0	2	50,50	0,4999
chrI	9273518	9273716	neuron_readCounts:152;intestine_readCounts:214;neuron_PSI:0.266;intestine_PSI:0.904	950	-	9273518	9273716	0	2	50,50	0,148
chrIII	6997846	7007598	neuron_readCounts:2;intestine_readCounts:11;neuron_PSI:0.004;intestine_PSI:0.076	950	+	6997846	7007598	0	2	50,50	0,9702
chrIII	6997846	7001545	neuron_readCounts:549;intestine_readCounts:74;neuron_PSI:0.82;intestine_PSI:0.481	950	+	6997846	7001545	0	2	50,50	0,3649
chrIII	6997846	7001946	neuron_readCounts:106;intestine_readCounts:66;neuron_PSI:0.176;intestine_PSI:0.443	950	+	6997846	7001946	0	2	50,50	0,4050
chrII	9365729	9367518	neuron_readCounts:894;intestine_readCounts:98;neuron_PSI:0.796;intestine_PSI:0.31	950	+	9365729	9367518	0	2	50,50	0,1739
chrII	9365729	9366022	neuron_readCounts:240;intestine_readCounts:272;neuron_PSI:0.204;intestine_PSI:0.69	950	+	9365729	9366022	0	2	50,50	0,243
chrX	9383041	9385623	neuron_readCounts:4151;intestine_readCounts:41;neuron_PSI:0.673;intestine_PSI:0.028	950	+	9383041	9385623	0	2	50,50	0,2532
chrX	9383041	9383515	neuron_readCounts:1724;intestine_readCounts:1368;neuron_PSI:0.327;intestine_PSI:0.972	950	+	9383041	9383515	0	2	50,50	0,424
chrIII	9460173	9460567	neuron_readCounts:641;intestine_readCounts:16;neuron_PSI:0.536;intestine_PSI:0.024	950	+	9460173	9460567	0	2	50,50	0,344
chrIII	9460173	9461115	neuron_readCounts:568;intestine_readCounts:483;neuron_PSI:0.464;intestine_PSI:0.976	950	+	9460173	9461115	0	2	50,50	0,892
chrIII	9460644	9461115	neuron_readCounts:724;intestine_readCounts:32;neuron_PSI:0.562;intestine_PSI:0.044	950	+	9460644	9461115	0	2	50,50	0,421
chrIII	9548771	9549221	neuron_readCounts:30;intestine_readCounts:88;neuron_PSI:0.102;intestine_PSI:0.592	950	+	9548771	9549221	0	2	50,50	0,400
chrIII	9548637	9549221	neuron_readCounts:251;intestine_readCounts:88;neuron_PSI:0.898;intestine_PSI:0.408	950	+	9548637	9549221	0	2	50,50	0,534
chrIII	9551502	9551677	neuron_readCounts:119;intestine_readCounts:213;neuron_PSI:0.216;intestine_PSI:0.694	950	+	9551502	9551677	0	2	50,50	0,125
chrIII	9551502	9552631	neuron_readCounts:439;intestine_readCounts:94;neuron_PSI:0.784;intestine_PSI:0.306	950	+	9551502	9552631	0	2	50,50	0,1079
chrV	9553791	9553984	neuron_readCounts:403;intestine_readCounts:568;neuron_PSI:0.206;intestine_PSI:0.823	950	+	9553791	9553984	0	2	50,50	0,143
chrIII	9553673	9554147	neuron_readCounts:768;intestine_readCounts:41;neuron_PSI:0.821;intestine_PSI:0.184	950	+	9553673	9554147	0	2	50,50	0,424
chrIII	9553673	9554492	neuron_readCounts:167;intestine_readCounts:123;neuron_PSI:0.179;intestine_PSI:0.816	950	+	9553673	9554492	0	2	50,50	0,769
chrIII	9554131	9554492	neuron_readCounts:809;intestine_readCounts:55;neuron_PSI:0.829;intestine_PSI:0.306	950	+	9554131	9554492	0	2	50,50	0,311
chrV	9553946	9554902	neuron_readCounts:1178;intestine_readCounts:87;neuron_PSI:0.576;intestine_PSI:0.106	950	+	9553946	9554902	0	2	50,50	0,906
chrV	9553946	9554668	neuron_readCounts:905;intestine_readCounts:784;neuron_PSI:0.424;intestine_PSI:0.894	950	+	9553946	9554668	0	2	50,50	0,672
chrV	9554688	9554902	neuron_readCounts:951;intestine_readCounts:826;neuron_PSI:0.437;intestine_PSI:0.9	950	+	9554688	9554902	0	2	50,50	0,164
chrIV	9936513	9936727	neuron_readCounts:40;intestine_readCounts:2;neuron_PSI:0.293;intestine_PSI:0.016	950	-	9936513	9936727	0	2	50,50	0,164
chrIV	9936513	9937086	neuron_readCounts:80;intestine_readCounts:135;neuron_PSI:0.707;intestine_PSI:0.984	950	-	9936513	9937086	0	2	50,50	0,523
chrX	9993171	9993680	neuron_readCounts:562;intestine_readCounts:114;neuron_PSI:0.307;intestine_PSI:0.554	950	-	9993171	9993680	0	2	50,50	0,459
chrX	9992104	9993680	neuron_readCounts:846;intestine_readCounts:9;neuron_PSI:0.462;intestine_PSI:0.039	950	-	9992104	9993680	0	2	50,50	0,1526
chrX	9993239	9993680	neuron_readCounts:420;intestine_readCounts:87;neuron_PSI:0.23;intestine_PSI:0.407	950	-	9993239	9993680	0	2	50,50	0,391
chrX	9992104	9993006	neuron_readCounts:1511;intestine_readCounts:450;neuron_PSI:0.637;intestine_PSI:0.98	950	-	9992104	9993006	0	2	50,50	0,852
chrII	9993916	9994325	neuron_readCounts:512;intestine_readCounts:22;neuron_PSI:0.329;intestine_PSI:0.03	950	+	9993916	9994325	0	2	50,50	0,359
chrII	9991379	9994325	neuron_readCounts:1035;intestine_readCounts:594;neuron_PSI:0.671;intestine_PSI:0.97	950	+	9991379	9994325	0	2	50,50	0,2896
chrII	9998531	9998743	neuron_readCounts:7417;intestine_readCounts:1966;neuron_PSI:0.909;intestine_PSI:0.689	950	+	9998531	9998743	0	2	50,50	0,162
chrII	9998531	9999251	neuron_readCounts:669;intestine_readCounts:796;neuron_PSI:0.091;intestine_PSI:0.311	950	+	9998531	9999251	0	2	50,50	0,670
chrI	10093733	10100713	neuron_readCounts:24;intestine_readCounts:53;neuron_PSI:0.055;intestine_PSI:0.123	950	-	10093733	10100713	0	2	50,50	0,6930
chrI	10093727	10093914	neuron_readCounts:273;intestine_readCounts:52;neuron_PSI:0.62;intestine_PSI:0.094	950	-	10093727	10093914	0	2	50,50	0,137
chrI	10093727	10100713	neuron_readCounts:143;intestine_readCounts:311;neuron_PSI:0.325;intestine_PSI:0.782	950	-	10093727	10100713	0	2	50,50	0,6936
chrX	10106248	10106877	neuron_readCounts:737;intestine_readCounts:53;neuron_PSI:0.764;intestine_PSI:0.428	950	-	10106248	10106877	0	2	50,50	0,579
chrX	10106671	10106877	neuron_readCounts:242;intestine_readCounts:71;neuron_PSI:0.236;intestine_PSI:0.572	950	-	10106671	10106877	0	2	50,50	0,156
chrIV	10165802	10166014	neuron_readCounts:356;intestine_readCounts:391;neuron_PSI:0.418;intestine_PSI:0.884	950	-	10165802	10166014	0	2	50,50	0,162
chrIV	10165483	10166014	neuron_readCounts:468;intestine_readCounts:44;neuron_PSI:0.582;intestine_PSI:0.116	950	-	10165483	10166014	0	2	50,50	0,481
chrX	10177374	10179541	neuron_readCounts:161;intestine_readCounts:93;neuron_PSI:0.948;intestine_PSI:0.689	950	+	10177374	10179541	0	2	50,50	0,2117
chrX	10179335	10179541	neuron_readCounts:9;intestine_readCounts:40;neuron_PSI:0.052;intestine_PSI:0.311	950	+	10179335	10179541	0	2	50,50	0,156
chrV	10250626	10250890	neuron_readCounts:218;intestine_readCounts:219;neuron_PSI:0.245;intestine_PSI:0.727	950	+	10250626	10250890	0	2	50,50	0,214
chrV	10250626	10251376	neuron_readCounts:671;intestine_readCounts:81;neuron_PSI:0.755;intestine_PSI:0.273	950	+	10250626	10251376	0	2	50,50	0,700
chrV	10251483	10251726	neuron_readCounts:1141;intestine_readCounts:143;neuron_PSI:0.789;intestine_PSI:0.312	950	+	10251483	10251726	0	2	50,50	0,193
chrV	10250982	10251726	neuron_readCounts:310;intestine_readCounts:283;neuron_PSI:0.211;intestine_PSI:0.688	950	+	10250982	10251726	0	2	50,50	0,694
chrV	10322928	10323745	neuron_readCounts:100;intestine_readCounts:8;neuron_PSI:0.118;intestine_PSI:0.016	950	-	10322928	10323745	0	2	50,50	0,767
chrV	10322928	10323697	neuron_readCounts:151;intestine_readCounts:6;neuron_PSI:0.221;intestine_PSI:0.013	950	-	10322928	10323697	0	2	50,50	0,719
chrV	10322928	10323075	neuron_readCounts:546;intestine_readCounts:431;neuron_PSI:0.66;intestine_PSI:0.971	950	-	10322928	10323075	0	2	50,50	0,97
chrX	7766204	7766589	neuron_readCounts:44;intestine_readCounts:59;neuron_PSI:0.469;intestine_PSI:0.902	950	+	7766204	7766589	0	2	50,50	0,335
chrX	7765709	7766589	neuron_readCounts:9;intestine_readCounts:2;neuron_PSI:0.137;intestine_PSI:0.031	950	+	7765709	7766589	0	2	50,50	0,830
chrX	7765950	7766589	neuron_readCounts:34;intestine_readCounts:4;neuron_PSI:0.394;intestine_PSI:0.067	950	+	7765950	7766589	0	2	50,50	0,589
chrI	10384225	10385447	neuron_readCounts:2;intestine_readCounts:5;neuron_PSI:0.006;intestine_PSI:0.056	950	-	10384225	10385447	0	2	50,50	0,1172
chrI	10384225	10385511	neuron_readCounts:202;intestine_readCounts:60;neuron_PSI:0.423;intestine_PSI:0.703	950	-	10384225	10385511	0	2	50,50	0,1236
chrI	10384225	10384653	neuron_readCounts:4;intestine_readCounts:3;neuron_PSI:0.008;intestine_PSI:0.034	950	-	10384225	10384653	0	2	50,50	0,378
chrI	10384225	10385355	neuron_readCounts:291;intestine_readCounts:18;neuron_PSI:0.563;intestine_PSI:0.207	950	-	10384225	10385355	0	2	50,50	0,1080
chrX	10423761	10424281	neuron_readCounts:171;intestine_readCounts:80;neuron_PSI:0.482;intestine_PSI:0.896	950	-	10423761	10424281	0	2	50,50	0,470
chrX	10424098	10424281	neuron_readCounts:182;intestine_readCounts:12;neuron_PSI:0.518;intestine_PSI:0.104	950	-	10424098	10424281	0	2	50,50	0,133
chrX	10423761	10424171	neuron_readCounts:196;intestine_readCounts:11;neuron_PSI:0.541;intestine_PSI:0.097	950	-	10423761	10424171	0	2	50,50	0,360
chrIII	10466137	10466344	neuron_readCounts:381;intestine_readCounts:604;neuron_PSI:0.578;intestine_PSI:0.986	950	+	10466137	10466344	0	2	50,50	0,157
chrIII	10466137	10467087	neuron_readCounts:274;intestine_readCounts:10;neuron_PSI:0.422;intestine_PSI:0.014	950	+	10466137	10467087	0	2	50,50	0,900
chrIII	10466532	10467087	neuron_readCounts:399;intestine_readCounts:829;neuron_PSI:0.609;intestine_PSI:0.99	950	+	10466532	10467087	0	2	50,50	0,505
chrI	10476685	10477015	neuron_readCounts:11;intestine_readCounts:18;neuron_PSI:0.013;intestine_PSI:0.036	950	-	10476685	10477015	0	2	50,50	0,280
chrI	10476679	10476828	neuron_readCounts:653;intestine_readCounts:154;neuron_PSI:0.793;intestine_PSI:0.41	950	-	10476679	10476828	0	2	50,50	0,99
chrI	10476685	10476828	neuron_readCounts:166;intestine_readCounts:192;neuron_PSI:0.194;intestine_PSI:0.554	950	-	10476685	10476828	0	2	50,50	0,93
chrI	10639701	10639968	neuron_readCounts:783;intestine_readCounts:694;neuron_PSI:0.614;intestine_PSI:0.943	950	-	10639701	10639968	0	2	50,50	0,217
chrI	10639823	10639968	neuron_readCounts:436;intestine_readCounts:36;neuron_PSI:0.386;intestine_PSI:0.057	950	-	10639823	10639968	0	2	50,50	0,95
chrI	10639701	10639890	neuron_readCounts:449;intestine_readCounts:28;neuron_PSI:0.394;intestine_PSI:0.042	950	-	10639701	10639890	0	2	50,50	0,139
chrI	10699747	10700596	neuron_readCounts:15;intestine_readCounts:15;neuron_PSI:0.042;intestine_PSI:0.054	950	-	10699747	10700596	0	2	50,50	0,799
chrI	10765233	10773009	neuron_readCounts:396;intestine_readCounts:301;neuron_PSI:0.609;intestine_PSI:0.951	950	+	10765233	10773009	0	2	50,50	0,7726
chrI	10772099	10773009	neuron_readCounts:260;intestine_readCounts:22;neuron_PSI:0.391;intestine_PSI:0.049	950	+	10772099	10773009	0	2	50,50	0,860
chrI	10970588	10972208	neuron_readCounts:101;intestine_readCounts:92;neuron_PSI:0.707;intestine_PSI:0.959	950	+	10970588	10972208	0	2	50,50	0,1570
chrI	10972051	10972208	neuron_readCounts:42;intestine_readCounts:4;neuron_PSI:0.293;intestine_PSI:0.041	950	+	10972051	10972208	0	2	50,50	0,107
chrX	11022018	11022429	neuron_readCounts:23;intestine_readCounts:46;neuron_PSI:0.21;intestine_PSI:0.159	950	+	11022018	11022429	0	2	50,50	0,361
chrX	11022155	11022429	neuron_readCounts:60;intestine_readCounts:46;neuron_PSI:0.436;intestine_PSI:0.191	950	+	11022155	11022429	0	2	50,50	0,224
chrX	11021893	11022429	neuron_readCounts:64;intestine_readCounts:209;neuron_PSI:0.353;intestine_PSI:0.65	950	+	11021893	11022429	0	2	50,50	0,486
chrIII	11023542	11023700	neuron_readCounts:781;intestine_readCounts:14;neuron_PSI:0.993;intestine_PSI:0.312	950	+	11023542	11023700	0	2	50,50	0,108
chrIII	11023542	11023806	neuron_readCounts:3;intestine_readCounts:38;neuron_PSI:0.007;intestine_PSI:0.688	950	+	11023542	11023806	0	2	50,50	0,214
chrIII	11023626	11023806	neuron_readCounts:919;intestine_readCounts:18;neuron_PSI:0.994;intestine_PSI:0.371	950	+	11023626	11023806	0	2	50,50	0,130
chrIV	11042383	11042585	neuron_readCounts:43;intestine_readCounts:13;neuron_PSI:0.658;intestine_PSI:0.214	950	+	11042383	11042585	0	2	50,50	0,152
chrIV	11042383	11042978	neuron_readCounts:21;intestine_readCounts:50;neuron_PSI:0.342;intestine_PSI:0.786	950	+	11042383	11042978	0	2	50,50	0,545
chrIV	11042572	11042978	neuron_readCounts:41;intestine_readCounts:5;neuron_PSI:0.662;intestine_PSI:0.083	950	+	11042572	11042978	0	2	50,50	0,356
chrII	11051247	11051548	neuron_readCounts:69;intestine_readCounts:9;neuron_PSI:0.424;intestine_PSI:0.091	950	+	11051247	11051548	0	2	50,50	0,251
chrII	11051247	11051387	neuron_readCounts:92;intestine_readCounts:105;neuron_PSI:0.576;intestine_PSI:0.909	950	+	11051247	11051387	0	2	50,50	0,90
chrII	11051394	11051548	neuron_readCounts:135;intestine_readCounts:141;neuron_PSI:0.658;intestine_PSI:0.934	950	+	11051394	11051548	0	2	50,50	0,104
chrX	11203241	11204212	neuron_readCounts:42;intestine_readCounts:3;neuron_PSI:0.203;intestine_PSI:0.008	950	-	11203241	11204212	0	2	50,50	0,921
chrV	8417850	8422104	neuron_readCounts:363;intestine_readCounts:226;neuron_PSI:0.14;intestine_PSI:0.354	950	-	8417850	8422104	0	2	50,50	0,4204
chrV	8417850	8418420	neuron_readCounts:869;intestine_readCounts:37;neuron_PSI:0.338;intestine_PSI:0.078	950	-	8417850	8418420	0	2	50,50	0,520
chrV	8417850	8427583	neuron_readCounts:1346;intestine_readCounts:341;neuron_PSI:0.522;intestine_PSI:0.569	950	-	8417850	8427583	0	2	50,50	0,9683
chrIV	11342986	11344414	neuron_readCounts:31;intestine_readCounts:17;neuron_PSI:0.292;intestine_PSI:0.056	950	-	11342986	11344414	0	2	50,50	0,1378
chrIV	11343515	11344414	neuron_readCounts:72;intestine_readCounts:274;neuron_PSI:0.708;intestine_PSI:0.944	950	-	11343515	11344414	0	2	50,50	0,849
chrIV	11342986	11345933	neuron_readCounts:889;intestine_readCounts:600;neuron_PSI:0.868;intestine_PSI:0.56	950	-	11342986	11345933	0	2	50,50	0,2897
chrIV	11342986	11343366	neuron_readCounts:39;intestine_readCounts:92;neuron_PSI:0.044;intestine_PSI:0.098	950	-	11342986	11343366	0	2	50,50	0,330
chrIV	11342986	11343441	neuron_readCounts:85;intestine_readCounts:326;neuron_PSI:0.088;intestine_PSI:0.342	950	-	11342986	11343441	0	2	50,50	0,405
chrII	11385104	11386118	neuron_readCounts:158;intestine_readCounts:118;neuron_PSI:0.146;intestine_PSI:0.409	950	-	11385104	11386118	0	2	50,50	0,964
chrII	11385881	11386118	neuron_readCounts:946;intestine_readCounts:191;neuron_PSI:0.854;intestine_PSI:0.591	950	-	11385881	11386118	0	2	50,50	0,187
chrX	11670390	11670536	neuron_readCounts:308;intestine_readCounts:3;neuron_PSI:0.47;intestine_PSI:0.02	950	+	11670390	11670536	0	2	50,50	0,96
chrX	11670390	11670787	neuron_readCounts:347;intestine_readCounts:187;neuron_PSI:0.53;intestine_PSI:0.98	950	+	11670390	11670787	0	2	50,50	0,347
chrX	11670450	11670787	neuron_readCounts:212;intestine_readCounts:3;neuron_PSI:0.38;intestine_PSI:0.02	950	+	11670450	11670787	0	2	50,50	0,287
chrIII	11676447	11685259	neuron_readCounts:147;intestine_readCounts:43;neuron_PSI:0.509;intestine_PSI:0.35	950	+	11676447	11685259	0	2	50,50	0,8762
chrIII	11685078	11685259	neuron_readCounts:26;intestine_readCounts:109;neuron_PSI:0.091;intestine_PSI:0.621	950	+	11685078	11685259	0	2	50,50	0,131
chrIII	11683378	11685259	neuron_readCounts:115;intestine_readCounts:3;neuron_PSI:0.4;intestine_PSI:0.029	950	+	11683378	11685259	0	2	50,50	0,1831
chrI	11688913	11689394	neuron_readCounts:70;intestine_readCounts:18;neuron_PSI:0.018;intestine_PSI:0.063	950	-	11688913	11689394	0	2	50,50	0,431
chrI	11689063	11689394	neuron_readCounts:3599;intestine_readCounts:120;neuron_PSI:0.853;intestine_PSI:0.428	950	-	11689063	11689394	0	2	50,50	0,281
chrI	11688938	11689394	neuron_readCounts:533;intestine_readCounts:142;neuron_PSI:0.129;intestine_PSI:0.51	950	-	11688938	11689394	0	2	50,50	0,406
chrI	11688938	11689084	neuron_readCounts:2617;intestine_readCounts:104;neuron_PSI:0.806;intestine_PSI:0.393	950	-	11688938	11689084	0	2	50,50	0,96
chrIII	7042305	7047605	neuron_readCounts:71;intestine_readCounts:2;neuron_PSI:0.207;intestine_PSI:0.038	950	-	7042305	7047605	0	2	50,50	0,5250
chrIII	7042305	7044878	neuron_readCounts:72;intestine_readCounts:2;neuron_PSI:0.213;intestine_PSI:0.038	950	-	7042305	7044878	0	2	50,50	0,2523
chrIII	7042305	7050326	neuron_readCounts:51;intestine_readCounts:2;neuron_PSI:0.142;intestine_PSI:0.038	950	-	7042305	7050326	0	2	50,50	0,7971
chrIII	7042305	7055761	neuron_readCounts:14;intestine_readCounts:41;neuron_PSI:0.056;intestine_PSI:0.746	950	-	7042305	7055761	0	2	50,50	0,13406
chrIII	7042305	7051594	neuron_readCounts:126;intestine_readCounts:7;neuron_PSI:0.382;intestine_PSI:0.142	950	-	7042305	7051594	0	2	50,50	0,9239
chrI	11749111	11749324	neuron_readCounts:85;intestine_readCounts:21;neuron_PSI:0.269;intestine_PSI:0.027	950	-	11749111	11749324	0	2	50,50	0,163
chrI	11748807	11749324	neuron_readCounts:232;intestine_readCounts:709;neuron_PSI:0.731;intestine_PSI:0.973	950	-	11748807	11749324	0	2	50,50	0,467
chrI	11748807	11749178	neuron_readCounts:81;intestine_readCounts:26;neuron_PSI:0.258;intestine_PSI:0.032	950	-	11748807	11749178	0	2	50,50	0,321
chrIV	11769604	11770079	neuron_readCounts:70;intestine_readCounts:362;neuron_PSI:0.153;intestine_PSI:0.796	950	-	11769604	11770079	0	2	50,50	0,425
chrIV	11769830	11770079	neuron_readCounts:1101;intestine_readCounts:92;neuron_PSI:0.847;intestine_PSI:0.204	950	-	11769830	11770079	0	2	50,50	0,199
chrIV	11769604	11769888	neuron_readCounts:291;intestine_readCounts:51;neuron_PSI:0.241;intestine_PSI:0.127	950	-	11769604	11769888	0	2	50,50	0,234
chrIV	11769604	11769897	neuron_readCounts:1027;intestine_readCounts:38;neuron_PSI:0.6;intestine_PSI:0.087	950	-	11769604	11769897	0	2	50,50	0,243
chrIII	11838070	11841897	neuron_readCounts:305;intestine_readCounts:427;neuron_PSI:0.372;intestine_PSI:0.98	950	-	11838070	11841897	0	2	50,50	0,3777
chrIII	11839825	11841897	neuron_readCounts:527;intestine_readCounts:11;neuron_PSI:0.628;intestine_PSI:0.02	950	-	11839825	11841897	0	2	50,50	0,2022
chrIII	11838070	11839799	neuron_readCounts:807;intestine_readCounts:19;neuron_PSI:0.725;intestine_PSI:0.031	950	-	11838070	11839799	0	2	50,50	0,1679
chrII	11847976	11848472	neuron_readCounts:132;intestine_readCounts:488;neuron_PSI:0.481;intestine_PSI:0.882	950	-	11847976	11848472	0	2	50,50	0,446
chrII	11848322	11848472	neuron_readCounts:193;intestine_readCounts:53;neuron_PSI:0.519;intestine_PSI:0.118	950	-	11848322	11848472	0	2	50,50	0,100
chrV	11849441	11850830	neuron_readCounts:501;intestine_readCounts:686;neuron_PSI:0.37;intestine_PSI:0.965	950	+	11849441	11850830	0	2	50,50	0,1339
chrV	11849441	11849838	neuron_readCounts:730;intestine_readCounts:38;neuron_PSI:0.63;intestine_PSI:0.035	950	+	11849441	11849838	0	2	50,50	0,347
chrV	11849832	11850830	neuron_readCounts:777;intestine_readCounts:45;neuron_PSI:0.645;intestine_PSI:0.057	950	+	11849832	11850830	0	2	50,50	0,948
chrIII	8906224	8906573	neuron_readCounts:19;intestine_readCounts:35;neuron_PSI:0.09;intestine_PSI:0.346	950	+	8906224	8906573	0	2	50,50	0,299
chrIII	8906224	8907360	neuron_readCounts:12;intestine_readCounts:49;neuron_PSI:0.061;intestine_PSI:0.54	950	+	8906224	8907360	0	2	50,50	0,1086
chrIII	8906224	8907016	neuron_readCounts:178;intestine_readCounts:11;neuron_PSI:0.848;intestine_PSI:0.114	950	+	8906224	8907016	0	2	50,50	0,742
chrIII	11934130	11941214	neuron_readCounts:1364;intestine_readCounts:6042;neuron_PSI:0.736;intestine_PSI:0.934	950	-	11934130	11941214	0	2	50,50	0,7034
chrIII	11934130	11936963	neuron_readCounts:536;intestine_readCounts:317;neuron_PSI:0.264;intestine_PSI:0.066	950	-	11934130	11936963	0	2	50,50	0,2783
chrIV	12135521	12136252	neuron_readCounts:2096;intestine_readCounts:893;neuron_PSI:0.729;intestine_PSI:0.987	950	-	12135521	12136252	0	2	50,50	0,681
chrIV	12135521	12136127	neuron_readCounts:837;intestine_readCounts:13;neuron_PSI:0.271;intestine_PSI:0.013	950	-	12135521	12136127	0	2	50,50	0,556
chrII	9130839	9130997	neuron_readCounts:1599;intestine_readCounts:154;neuron_PSI:0.263;intestine_PSI:0.051	950	+	9130839	9130997	0	2	50,50	0,108
chrII	9123286	9130997	neuron_readCounts:3326;intestine_readCounts:1675;neuron_PSI:0.612;intestine_PSI:0.608	950	+	9123286	9130997	0	2	50,50	0,7661
chrII	9127577	9130997	neuron_readCounts:632;intestine_readCounts:1035;neuron_PSI:0.125;intestine_PSI:0.342	950	+	9127577	9130997	0	2	50,50	0,3370
chrI	9174828	9175044	neuron_readCounts:54;intestine_readCounts:69;neuron_PSI:0.037;intestine_PSI:0.091	950	+	9174828	9175044	0	2	50,50	0,166
chrI	9171542	9175044	neuron_readCounts:888;intestine_readCounts:592;neuron_PSI:0.466;intestine_PSI:0.756	950	+	9171542	9175044	0	2	50,50	0,3452
chrI	9174289	9175044	neuron_readCounts:958;intestine_readCounts:115;neuron_PSI:0.497;intestine_PSI:0.152	950	+	9174289	9175044	0	2	50,50	0,705
chrV	12346324	12348379	neuron_readCounts:23;intestine_readCounts:65;neuron_PSI:0.151;intestine_PSI:0.13	950	+	12346324	12348379	0	2	50,50	0,2005
chrV	12348226	12348379	neuron_readCounts:45;intestine_readCounts:428;neuron_PSI:0.332;intestine_PSI:0.771	950	+	12348226	12348379	0	2	50,50	0,103
chrV	12346026	12348379	neuron_readCounts:61;intestine_readCounts:49;neuron_PSI:0.517;intestine_PSI:0.099	950	+	12346026	12348379	0	2	50,50	0,2303
chrIV	12352261	12353063	neuron_readCounts:82;intestine_readCounts:130;neuron_PSI:0.141;intestine_PSI:0.774	950	+	12352261	12353063	0	2	50,50	0,752
chrIV	12352261	12353193	neuron_readCounts:502;intestine_readCounts:49;neuron_PSI:0.859;intestine_PSI:0.226	950	+	12352261	12353193	0	2	50,50	0,882
chrIV	12353005	12353193	neuron_readCounts:112;intestine_readCounts:144;neuron_PSI:0.175;intestine_PSI:0.787	950	+	12353005	12353193	0	2	50,50	0,138
chrIV	12353754	12353946	neuron_readCounts:1631;intestine_readCounts:75;neuron_PSI:0.752;intestine_PSI:0.14	950	+	12353754	12353946	0	2	50,50	0,142
chrIV	12353754	12354145	neuron_readCounts:388;intestine_readCounts:454;neuron_PSI:0.248;intestine_PSI:0.86	950	+	12353754	12354145	0	2	50,50	0,341
chrIV	12353879	12354145	neuron_readCounts:1640;intestine_readCounts:89;neuron_PSI:0.765;intestine_PSI:0.163	950	+	12353879	12354145	0	2	50,50	0,216
chrIV	12354107	12354556	neuron_readCounts:291;intestine_readCounts:28;neuron_PSI:0.166;intestine_PSI:0.048	950	+	12354107	12354556	0	2	50,50	0,399
chrIV	12354107	12354598	neuron_readCounts:563;intestine_readCounts:53;neuron_PSI:0.315;intestine_PSI:0.092	950	+	12354107	12354598	0	2	50,50	0,441
chrIV	12354107	12355439	neuron_readCounts:1122;intestine_readCounts:498;neuron_PSI:0.519;intestine_PSI:0.86	950	+	12354107	12355439	0	2	50,50	0,1282
chrIV	12354568	12355439	neuron_readCounts:812;intestine_readCounts:73;neuron_PSI:0.462;intestine_PSI:0.128	950	+	12354568	12355439	0	2	50,50	0,821
chrIV	12413189	12413903	neuron_readCounts:212;intestine_readCounts:185;neuron_PSI:0.038;intestine_PSI:0.598	950	-	12413189	12413903	0	2	50,50	0,664
chrIV	12413751	12413903	neuron_readCounts:5936;intestine_readCounts:139;neuron_PSI:0.962;intestine_PSI:0.402	950	-	12413751	12413903	0	2	50,50	0,102
chrIV	12413189	12413794	neuron_readCounts:7515;intestine_readCounts:190;neuron_PSI:0.968;intestine_PSI:0.509	950	-	12413189	12413794	0	2	50,50	0,555
chrIII	12481626	12482839	neuron_readCounts:226;intestine_readCounts:1539;neuron_PSI:0.098;intestine_PSI:0.93	950	+	12481626	12482839	0	2	50,50	0,1163
chrIII	12481626	12481777	neuron_readCounts:2143;intestine_readCounts:73;neuron_PSI:0.902;intestine_PSI:0.07	950	+	12481626	12481777	0	2	50,50	0,101
chrIII	12481704	12482839	neuron_readCounts:2342;intestine_readCounts:81;neuron_PSI:0.909;intestine_PSI:0.076	950	+	12481704	12482839	0	2	50,50	0,1085
chrII	9366123	9367518	neuron_readCounts:361;intestine_readCounts:519;neuron_PSI:0.245;intestine_PSI:0.803	950	+	9366123	9367518	0	2	50,50	0,1345
chrII	9365026	9367518	neuron_readCounts:170;intestine_readCounts:30;neuron_PSI:0.121;intestine_PSI:0.042	950	+	9365026	9367518	0	2	50,50	0,2442
chrV	12499543	12501324	neuron_readCounts:256;intestine_readCounts:256;neuron_PSI:0.583;intestine_PSI:0.822	950	+	12499543	12501324	0	2	50,50	0,1731
chrV	12499543	12499781	neuron_readCounts:166;intestine_readCounts:60;neuron_PSI:0.417;intestine_PSI:0.178	950	+	12499543	12499781	0	2	50,50	0,188
chrX	12505222	12505656	neuron_readCounts:65;intestine_readCounts:92;neuron_PSI:0.085;intestine_PSI:0.354	950	-	12505222	12505656	0	2	50,50	0,384
chrX	12505222	12505868	neuron_readCounts:3;intestine_readCounts:18;neuron_PSI:0.004;intestine_PSI:0.077	950	-	12505222	12505868	0	2	50,50	0,596
chrX	12505261	12505868	neuron_readCounts:61;intestine_readCounts:35;neuron_PSI:0.079;intestine_PSI:0.142	950	-	12505261	12505868	0	2	50,50	0,557
chrX	12505261	12505656	neuron_readCounts:638;intestine_readCounts:127;neuron_PSI:0.833;intestine_PSI:0.427	950	-	12505261	12505656	0	2	50,50	0,345
chrX	12505859	12506200	neuron_readCounts:370;intestine_readCounts:220;neuron_PSI:0.607;intestine_PSI:0.902	950	-	12505859	12506200	0	2	50,50	0,291
chrX	12505979	12506200	neuron_readCounts:242;intestine_readCounts:18;neuron_PSI:0.393;intestine_PSI:0.098	950	-	12505979	12506200	0	2	50,50	0,171
chrX	12505859	12506058	neuron_readCounts:251;intestine_readCounts:17;neuron_PSI:0.399;intestine_PSI:0.095	950	-	12505859	12506058	0	2	50,50	0,149
chrIII	12642264	12643760	neuron_readCounts:28;intestine_readCounts:149;neuron_PSI:0.257;intestine_PSI:0.923	950	+	12642264	12643760	0	2	50,50	0,1446
chrIII	12642264	12644520	neuron_readCounts:84;intestine_readCounts:10;neuron_PSI:0.743;intestine_PSI:0.077	950	+	12642264	12644520	0	2	50,50	0,2206
chrIII	12643750	12644520	neuron_readCounts:10;intestine_readCounts:55;neuron_PSI:0.117;intestine_PSI:0.82	950	+	12643750	12644520	0	2	50,50	0,720
chrIII	12643764	12644520	neuron_readCounts:2;intestine_readCounts:5;neuron_PSI:0.023;intestine_PSI:0.065	950	+	12643764	12644520	0	2	50,50	0,706
chrV	12700050	12703770	neuron_readCounts:5910;intestine_readCounts:3340;neuron_PSI:0.468;intestine_PSI:0.962	950	+	12700050	12703770	0	2	50,50	0,3670
chrV	12703593	12703770	neuron_readCounts:6590;intestine_readCounts:120;neuron_PSI:0.532;intestine_PSI:0.038	950	+	12703593	12703770	0	2	50,50	0,127
chrIII	9550185	9550770	neuron_readCounts:184;intestine_readCounts:252;neuron_PSI:0.477;intestine_PSI:0.918	950	+	9550185	9550770	0	2	50,50	0,535
chrIII	9550333	9550770	neuron_readCounts:178;intestine_readCounts:10;neuron_PSI:0.48;intestine_PSI:0.028	950	+	9550333	9550770	0	2	50,50	0,387
chrV	9553475	9553675	neuron_readCounts:240;intestine_readCounts:302;neuron_PSI:0.126;intestine_PSI:0.441	950	+	9553475	9553675	0	2	50,50	0,150
chrV	9553475	9553831	neuron_readCounts:83;intestine_readCounts:175;neuron_PSI:0.045;intestine_PSI:0.366	950	+	9553475	9553831	0	2	50,50	0,306
chrV	9553475	9553984	neuron_readCounts:1492;intestine_readCounts:119;neuron_PSI:0.829;intestine_PSI:0.194	950	+	9553475	9553984	0	2	50,50	0,459
chrX	9555275	9556677	neuron_readCounts:54;intestine_readCounts:24;neuron_PSI:0.109;intestine_PSI:0.118	950	+	9555275	9556677	0	2	50,50	0,1352
chrX	9556303	9556677	neuron_readCounts:114;intestine_readCounts:66;neuron_PSI:0.252;intestine_PSI:0.492	950	+	9556303	9556677	0	2	50,50	0,324
chrX	9555623	9556677	neuron_readCounts:321;intestine_readCounts:53;neuron_PSI:0.639;intestine_PSI:0.391	950	+	9555623	9556677	0	2	50,50	0,1004
chrII	12808570	12809735	neuron_readCounts:790;intestine_readCounts:3554;neuron_PSI:0.474;intestine_PSI:0.968	950	+	12808570	12809735	0	2	50,50	0,1115
chrII	12808570	12809325	neuron_readCounts:899;intestine_readCounts:70;neuron_PSI:0.526;intestine_PSI:0.032	950	+	12808570	12809325	0	2	50,50	0,705
chrII	12837432	12838116	neuron_readCounts:420;intestine_readCounts:62;neuron_PSI:0.558;intestine_PSI:0.923	950	-	12837432	12838116	0	2	50,50	0,634
chrII	12837432	12837668	neuron_readCounts:446;intestine_readCounts:4;neuron_PSI:0.442;intestine_PSI:0.077	950	-	12837432	12837668	0	2	50,50	0,186
chrV	12915505	12915657	neuron_readCounts:113;intestine_readCounts:17;neuron_PSI:0.797;intestine_PSI:0.239	950	+	12915505	12915657	0	2	50,50	0,102
chrV	12915505	12915865	neuron_readCounts:23;intestine_readCounts:77;neuron_PSI:0.203;intestine_PSI:0.761	950	+	12915505	12915865	0	2	50,50	0,310
chrI	13036864	13043025	neuron_readCounts:185;intestine_readCounts:193;neuron_PSI:0.107;intestine_PSI:0.426	950	+	13036864	13043025	0	2	50,50	0,6111
chrI	13035596	13043025	neuron_readCounts:1509;intestine_readCounts:261;neuron_PSI:0.893;intestine_PSI:0.574	950	+	13035596	13043025	0	2	50,50	0,7379
chrI	13043057	13043584	neuron_readCounts:1014;intestine_readCounts:22;neuron_PSI:0.264;intestine_PSI:0.042	950	+	13043057	13043584	0	2	50,50	0,477
chrI	13043057	13043863	neuron_readCounts:2831;intestine_readCounts:593;neuron_PSI:0.736;intestine_PSI:0.958	950	+	13043057	13043863	0	2	50,50	0,756
chrI	13043505	13043863	neuron_readCounts:1151;intestine_readCounts:22;neuron_PSI:0.289;intestine_PSI:0.042	950	+	13043505	13043863	0	2	50,50	0,308
chrIII	13089299	13090466	neuron_readCounts:481;intestine_readCounts:39;neuron_PSI:0.411;intestine_PSI:0.024	950	-	13089299	13090466	0	2	50,50	0,1117
chrIII	13089299	13090844	neuron_readCounts:495;intestine_readCounts:1541;neuron_PSI:0.589;intestine_PSI:0.976	950	-	13089299	13090844	0	2	50,50	0,1495
chrIII	13257537	13260788	neuron_readCounts:306;intestine_readCounts:1623;neuron_PSI:0.407;intestine_PSI:0.763	950	+	13257537	13260788	0	2	50,50	0,3201
chrIII	13260589	13260788	neuron_readCounts:421;intestine_readCounts:425;neuron_PSI:0.593;intestine_PSI:0.237	950	+	13260589	13260788	0	2	50,50	0,149
chrIII	9960736	9961284	neuron_readCounts:1806;intestine_readCounts:19;neuron_PSI:0.646;intestine_PSI:0.011	950	+	9960736	9961284	0	2	50,50	0,498
chrIII	9960736	9961433	neuron_readCounts:539;intestine_readCounts:941;neuron_PSI:0.2;intestine_PSI:0.752	950	+	9960736	9961433	0	2	50,50	0,647
chrIII	9960736	9961597	neuron_readCounts:432;intestine_readCounts:298;neuron_PSI:0.154;intestine_PSI:0.237	950	+	9960736	9961597	0	2	50,50	0,811
chrIII	13280607	13283836	neuron_readCounts:298;intestine_readCounts:1843;neuron_PSI:0.233;intestine_PSI:0.968	950	+	13280607	13283836	0	2	50,50	0,3179
chrIII	13280607	13282273	neuron_readCounts:869;intestine_readCounts:18;neuron_PSI:0.767;intestine_PSI:0.032	950	+	13280607	13282273	0	2	50,50	0,1616
chrV	10024969	10026510	neuron_readCounts:1634;intestine_readCounts:1316;neuron_PSI:0.413;intestine_PSI:0.63	950	+	10024969	10026510	0	2	50,50	0,1491
chrV	10026163	10026510	neuron_readCounts:311;intestine_readCounts:73;neuron_PSI:0.078;intestine_PSI:0.056	950	+	10026163	10026510	0	2	50,50	0,297
chrV	10025661	10026510	neuron_readCounts:2030;intestine_readCounts:652;neuron_PSI:0.509;intestine_PSI:0.314	950	+	10025661	10026510	0	2	50,50	0,799
chrX	13542579	13543282	neuron_readCounts:1138;intestine_readCounts:2821;neuron_PSI:0.564;intestine_PSI:0.962	950	+	13542579	13543282	0	2	50,50	0,653
chrX	13543126	13543282	neuron_readCounts:830;intestine_readCounts:118;neuron_PSI:0.436;intestine_PSI:0.038	950	+	13543126	13543282	0	2	50,50	0,106
chrX	13625847	13626965	neuron_readCounts:441;intestine_readCounts:170;neuron_PSI:0.497;intestine_PSI:0.867	950	-	13625847	13626965	0	2	50,50	0,1068
chrX	13626711	13626965	neuron_readCounts:533;intestine_readCounts:26;neuron_PSI:0.503;intestine_PSI:0.133	950	-	13626711	13626965	0	2	50,50	0,204
chrIII	13730193	13730422	neuron_readCounts:28;intestine_readCounts:23;neuron_PSI:0.419;intestine_PSI:0.205	950	-	13730193	13730422	0	2	50,50	0,179
chrIII	13729773	13730422	neuron_readCounts:47;intestine_readCounts:87;neuron_PSI:0.581;intestine_PSI:0.795	950	-	13729773	13730422	0	2	50,50	0,599
chrIII	10528786	10529481	neuron_readCounts:50;intestine_readCounts:26;neuron_PSI:0.123;intestine_PSI:0.362	950	+	10528786	10529481	0	2	50,50	0,645
chrIII	10528786	10528961	neuron_readCounts:158;intestine_readCounts:6;neuron_PSI:0.417;intestine_PSI:0.069	950	+	10528786	10528961	0	2	50,50	0,125
chrIII	10528786	10529387	neuron_readCounts:166;intestine_readCounts:44;neuron_PSI:0.46;intestine_PSI:0.569	950	+	10528786	10529387	0	2	50,50	0,551
chrIV	14063377	14064251	neuron_readCounts:333;intestine_readCounts:10;neuron_PSI:0.482;intestine_PSI:0.052	950	-	14063377	14064251	0	2	50,50	0,824
chrIV	14063377	14066857	neuron_readCounts:358;intestine_readCounts:145;neuron_PSI:0.518;intestine_PSI:0.948	950	-	14063377	14066857	0	2	50,50	0,3430
chrIV	14109359	14110684	neuron_readCounts:210;intestine_readCounts:637;neuron_PSI:0.367;intestine_PSI:0.978	950	-	14109359	14110684	0	2	50,50	0,1275
chrIV	14110496	14110684	neuron_readCounts:102;intestine_readCounts:5;neuron_PSI:0.18;intestine_PSI:0.008	950	-	14110496	14110684	0	2	50,50	0,138
chrIV	14110499	14110684	neuron_readCounts:279;intestine_readCounts:12;neuron_PSI:0.453;intestine_PSI:0.014	950	-	14110499	14110684	0	2	50,50	0,135
chrIV	14109359	14110524	neuron_readCounts:395;intestine_readCounts:17;neuron_PSI:0.641;intestine_PSI:0.019	950	-	14109359	14110524	0	2	50,50	0,1115
chrV	14115532	14117552	neuron_readCounts:177;intestine_readCounts:691;neuron_PSI:0.087;intestine_PSI:0.526	950	-	14115532	14117552	0	2	50,50	0,1970
chrV	14116630	14117552	neuron_readCounts:1827;intestine_readCounts:605;neuron_PSI:0.913;intestine_PSI:0.474	950	-	14116630	14117552	0	2	50,50	0,872
chrV	14115532	14116496	neuron_readCounts:2280;intestine_readCounts:957;neuron_PSI:0.928;intestine_PSI:0.582	950	-	14115532	14116496	0	2	50,50	0,914
chrI	14541757	14542313	neuron_readCounts:125;intestine_readCounts:125;neuron_PSI:0.106;intestine_PSI:0.779	950	+	14541757	14542313	0	2	50,50	0,506
chrI	14541757	14543389	neuron_readCounts:1086;intestine_readCounts:33;neuron_PSI:0.894;intestine_PSI:0.221	950	+	14541757	14543389	0	2	50,50	0,1582
chrI	14542330	14543389	neuron_readCounts:176;intestine_readCounts:187;neuron_PSI:0.141;intestine_PSI:0.832	950	+	14542330	14543389	0	2	50,50	0,1009
chrX	14622423	14622807	neuron_readCounts:241;intestine_readCounts:359;neuron_PSI:0.223;intestine_PSI:0.955	950	+	14622423	14622807	0	2	50,50	0,334
chrX	14622423	14622620	neuron_readCounts:843;intestine_readCounts:22;neuron_PSI:0.777;intestine_PSI:0.045	950	+	14622423	14622620	0	2	50,50	0,147
chrX	14622565	14622807	neuron_readCounts:784;intestine_readCounts:20;neuron_PSI:0.763;intestine_PSI:0.041	950	+	14622565	14622807	0	2	50,50	0,192
chrIV	14789464	14789899	neuron_readCounts:1733;intestine_readCounts:537;neuron_PSI:0.69;intestine_PSI:0.43	950	+	14789464	14789899	0	2	50,50	0,385
chrIV	14789464	14790197	neuron_readCounts:869;intestine_readCounts:813;neuron_PSI:0.31;intestine_PSI:0.57	950	+	14789464	14790197	0	2	50,50	0,683
chrI	14847875	14848120	neuron_readCounts:324;intestine_readCounts:345;neuron_PSI:0.368;intestine_PSI:0.94	950	+	14847875	14848120	0	2	50,50	0,195
chrI	14847875	14848618	neuron_readCounts:462;intestine_readCounts:23;neuron_PSI:0.632;intestine_PSI:0.06	950	+	14847875	14848618	0	2	50,50	0,693
chrI	14878943	14880659	neuron_readCounts:169;intestine_readCounts:166;neuron_PSI:0.092;intestine_PSI:0.418	950	-	14878943	14880659	0	2	50,50	0,1666
chrI	14880081	14880659	neuron_readCounts:1679;intestine_readCounts:227;neuron_PSI:0.908;intestine_PSI:0.582	950	-	14880081	14880659	0	2	50,50	0,528
chrI	14881124	14894625	neuron_readCounts:367;intestine_readCounts:586;neuron_PSI:0.177;intestine_PSI:0.594	950	-	14881124	14894625	0	2	50,50	0,13451
chrI	14881124	14882104	neuron_readCounts:1745;intestine_readCounts:410;neuron_PSI:0.823;intestine_PSI:0.406	950	-	14881124	14882104	0	2	50,50	0,930
chrV	14918870	14919785	neuron_readCounts:67;intestine_readCounts:313;neuron_PSI:0.222;intestine_PSI:0.639	950	-	14918870	14919785	0	2	50,50	0,865
chrV	14918870	14919347	neuron_readCounts:148;intestine_readCounts:193;neuron_PSI:0.778;intestine_PSI:0.361	950	-	14918870	14919347	0	2	50,50	0,427
chrV	11194577	11194823	neuron_readCounts:386;intestine_readCounts:296;neuron_PSI:0.297;intestine_PSI:0.416	950	-	11194577	11194823	0	2	50,50	0,196
chrV	11194009	11194823	neuron_readCounts:962;intestine_readCounts:181;neuron_PSI:0.627;intestine_PSI:0.254	950	-	11194009	11194823	0	2	50,50	0,764
chrV	11194292	11194823	neuron_readCounts:30;intestine_readCounts:239;neuron_PSI:0.075;intestine_PSI:0.331	950	-	11194292	11194823	0	2	50,50	0,481
chrV	11194009	11194256	neuron_readCounts:27;intestine_readCounts:60;neuron_PSI:0.024;intestine_PSI:0.103	950	-	11194009	11194256	0	2	50,50	0,197
chrV	11194009	11194252	neuron_readCounts:26;intestine_readCounts:65;neuron_PSI:0.051;intestine_PSI:0.112	950	-	11194009	11194252	0	2	50,50	0,193
chrV	11194009	11194623	neuron_readCounts:363;intestine_readCounts:275;neuron_PSI:0.274;intestine_PSI:0.473	950	-	11194009	11194623	0	2	50,50	0,564
chrI	14950361	14951491	neuron_readCounts:18438;intestine_readCounts:1560;neuron_PSI:0.976;intestine_PSI:0.578	950	+	14950361	14951491	0	2	50,50	0,1080
chrI	14950361	14950945	neuron_readCounts:443;intestine_readCounts:995;neuron_PSI:0.024;intestine_PSI:0.422	950	+	14950361	14950945	0	2	50,50	0,534
chrI	14951107	14951491	neuron_readCounts:260;intestine_readCounts:890;neuron_PSI:0.014;intestine_PSI:0.397	950	+	14951107	14951491	0	2	50,50	0,334
chrIV	15022442	15024178	neuron_readCounts:4151;intestine_readCounts:1341;neuron_PSI:0.595;intestine_PSI:0.936	950	+	15022442	15024178	0	2	50,50	0,1686
chrIV	15022442	15023451	neuron_readCounts:2833;intestine_readCounts:89;neuron_PSI:0.405;intestine_PSI:0.064	950	+	15022442	15023451	0	2	50,50	0,959
chrIV	15023390	15024178	neuron_readCounts:2208;intestine_readCounts:53;neuron_PSI:0.347;intestine_PSI:0.037	950	+	15023390	15024178	0	2	50,50	0,738
chrX	15269676	15270709	neuron_readCounts:581;intestine_readCounts:282;neuron_PSI:0.708;intestine_PSI:0.47	950	-	15269676	15270709	0	2	50,50	0,983
chrX	15270698	15271132	neuron_readCounts:478;intestine_readCounts:19;neuron_PSI:0.74;intestine_PSI:0.072	950	-	15270698	15271132	0	2	50,50	0,384
chrI	11521947	11524121	neuron_readCounts:2;intestine_readCounts:7;neuron_PSI:0.004;intestine_PSI:0.089	950	+	11521947	11524121	0	2	50,50	0,2124
chrI	11521947	11522174	neuron_readCounts:210;intestine_readCounts:18;neuron_PSI:0.378;intestine_PSI:0.223	950	+	11521947	11522174	0	2	50,50	0,177
chrI	11521947	11522180	neuron_readCounts:253;intestine_readCounts:12;neuron_PSI:0.464;intestine_PSI:0.153	950	+	11521947	11522180	0	2	50,50	0,183
chrI	11521947	11523866	neuron_readCounts:77;intestine_readCounts:44;neuron_PSI:0.154;intestine_PSI:0.535	950	+	11521947	11523866	0	2	50,50	0,1869
chrX	15572290	15572926	neuron_readCounts:434;intestine_readCounts:579;neuron_PSI:0.105;intestine_PSI:0.852	950	+	15572290	15572926	0	2	50,50	0,586
chrX	15572290	15572563	neuron_readCounts:4147;intestine_readCounts:94;neuron_PSI:0.895;intestine_PSI:0.148	950	+	15572290	15572563	0	2	50,50	0,223
chrX	15572545	15572926	neuron_readCounts:4789;intestine_readCounts:84;neuron_PSI:0.894;intestine_PSI:0.135	950	+	15572545	15572926	0	2	50,50	0,331
chrIII	9549407	9550415	neuron_readCounts:38;intestine_readCounts:5;neuron_PSI:0.113;intestine_PSI:0.018	950	+	9549407	9550415	0	2	50,50	0,958
chrIII	9549407	9550770	neuron_readCounts:16;intestine_readCounts:21;neuron_PSI:0.047;intestine_PSI:0.058	950	+	9549407	9550770	0	2	50,50	0,1313
chrIII	9549407	9550186	neuron_readCounts:150;intestine_readCounts:213;neuron_PSI:0.432;intestine_PSI:0.836	950	+	9549407	9550186	0	2	50,50	0,729
chrIII	9549407	9549696	neuron_readCounts:140;intestine_readCounts:25;neuron_PSI:0.409;intestine_PSI:0.088	950	+	9549407	9549696	0	2	50,50	0,239
chrV	16025551	16026212	neuron_readCounts:124;intestine_readCounts:45;neuron_PSI:0.278;intestine_PSI:0.068	950	+	16025551	16026212	0	2	50,50	0,611
chrV	16025551	16026523	neuron_readCounts:270;intestine_readCounts:710;neuron_PSI:0.722;intestine_PSI:0.932	950	+	16025551	16026523	0	2	50,50	0,922
chrV	16026139	16026523	neuron_readCounts:133;intestine_readCounts:26;neuron_PSI:0.33;intestine_PSI:0.041	950	+	16026139	16026523	0	2	50,50	0,334
chrX	16689762	16690541	neuron_readCounts:1022;intestine_readCounts:72;neuron_PSI:0.824;intestine_PSI:0.193	950	-	16689762	16690541	0	2	50,50	0,729
chrX	16689762	16690059	neuron_readCounts:221;intestine_readCounts:1126;neuron_PSI:0.176;intestine_PSI:0.807	950	-	16689762	16690059	0	2	50,50	0,247
chrV	16769761	16785434	neuron_readCounts:729;intestine_readCounts:69;neuron_PSI:0.879;intestine_PSI:0.515	950	+	16769761	16785434	0	2	50,50	0,15623
chrV	16785202	16785434	neuron_readCounts:99;intestine_readCounts:48;neuron_PSI:0.121;intestine_PSI:0.485	950	+	16785202	16785434	0	2	50,50	0,182
chrII	12809371	12810710	neuron_readCounts:716;intestine_readCounts:54;neuron_PSI:0.401;intestine_PSI:0.03	950	+	12809371	12810710	0	2	50,50	0,1289
chrII	12809781	12810710	neuron_readCounts:818;intestine_readCounts:4603;neuron_PSI:0.499;intestine_PSI:0.922	950	+	12809781	12810710	0	2	50,50	0,879
chrII	12810552	12810710	neuron_readCounts:191;intestine_readCounts:249;neuron_PSI:0.1;intestine_PSI:0.048	950	+	12810552	12810710	0	2	50,50	0,108
chrV	12915639	12915865	neuron_readCounts:97;intestine_readCounts:6;neuron_PSI:0.419;intestine_PSI:0.009	950	+	12915639	12915865	0	2	50,50	0,176
chrV	12914085	12915865	neuron_readCounts:98;intestine_readCounts:492;neuron_PSI:0.458;intestine_PSI:0.867	950	+	12914085	12915865	0	2	50,50	0,1730
chrX	13155428	13161387	neuron_readCounts:74;intestine_readCounts:89;neuron_PSI:0.089;intestine_PSI:0.163	950	-	13155428	13161387	0	2	50,50	0,5909
chrX	13155428	13169726	neuron_readCounts:438;intestine_readCounts:50;neuron_PSI:0.539;intestine_PSI:0.108	950	-	13155428	13169726	0	2	50,50	0,14248
chrX	13155428	13155630	neuron_readCounts:301;intestine_readCounts:428;neuron_PSI:0.372;intestine_PSI:0.729	950	-	13155428	13155630	0	2	50,50	0,152
chrIII	13197688	13200965	neuron_readCounts:463;intestine_readCounts:542;neuron_PSI:0.608;intestine_PSI:0.157	950	+	13197688	13200965	0	2	50,50	0,3227
chrIII	13197688	13202536	neuron_readCounts:27;intestine_readCounts:153;neuron_PSI:0.042;intestine_PSI:0.046	950	+	13197688	13202536	0	2	50,50	0,4798
chrIII	13197688	13200820	neuron_readCounts:342;intestine_readCounts:2865;neuron_PSI:0.35;intestine_PSI:0.797	950	+	13197688	13200820	0	2	50,50	0,3082
chrIII	13200970	13203915	neuron_readCounts:714;intestine_readCounts:999;neuron_PSI:0.587;intestine_PSI:0.218	950	+	13200970	13203915	0	2	50,50	0,2895
chrIII	13200831	13203915	neuron_readCounts:449;intestine_readCounts:3608;neuron_PSI:0.356;intestine_PSI:0.729	950	+	13200831	13203915	0	2	50,50	0,3034
chrIII	13202538	13203915	neuron_readCounts:32;intestine_readCounts:230;neuron_PSI:0.058;intestine_PSI:0.053	950	+	13202538	13203915	0	2	50,50	0,1327
chrV	13554471	13554937	neuron_readCounts:360;intestine_readCounts:332;neuron_PSI:0.37;intestine_PSI:0.724	950	-	13554471	13554937	0	2	50,50	0,416
chrV	13554471	13555149	neuron_readCounts:128;intestine_readCounts:64;neuron_PSI:0.134;intestine_PSI:0.181	950	-	13554471	13555149	0	2	50,50	0,628
chrV	13554471	13554628	neuron_readCounts:486;intestine_readCounts:49;neuron_PSI:0.496;intestine_PSI:0.095	950	-	13554471	13554628	0	2	50,50	0,107
chrX	13625847	13627232	neuron_readCounts:149;intestine_readCounts:7;neuron_PSI:0.134;intestine_PSI:0.033	950	-	13625847	13627232	0	2	50,50	0,1335
chrX	13625847	13626679	neuron_readCounts:589;intestine_readCounts:21;neuron_PSI:0.436;intestine_PSI:0.105	950	-	13625847	13626679	0	2	50,50	0,782
chrV	19062320	19063270	neuron_readCounts:19;intestine_readCounts:57;neuron_PSI:0.028;intestine_PSI:0.754	950	+	19062320	19063270	0	2	50,50	0,900
chrV	19061821	19063270	neuron_readCounts:543;intestine_readCounts:19;neuron_PSI:0.972;intestine_PSI:0.246	950	+	19061821	19063270	0	2	50,50	0,1399
chrV	19689595	19690791	neuron_readCounts:173;intestine_readCounts:288;neuron_PSI:0.693;intestine_PSI:0.99	950	+	19689595	19690791	0	2	50,50	0,1146
chrV	19689595	19689892	neuron_readCounts:79;intestine_readCounts:3;neuron_PSI:0.307;intestine_PSI:0.01	950	+	19689595	19689892	0	2	50,50	0,247
chrV	14830267	14831468	neuron_readCounts:706;intestine_readCounts:450;neuron_PSI:0.153;intestine_PSI:0.146	950	-	14830267	14831468	0	2	50,50	0,1151
chrV	14830267	14830810	neuron_readCounts:317;intestine_readCounts:1839;neuron_PSI:0.088;intestine_PSI:0.661	950	-	14830267	14830810	0	2	50,50	0,493
chrV	14830267	14833684	neuron_readCounts:2983;intestine_readCounts:856;neuron_PSI:0.759;intestine_PSI:0.193	950	-	14830267	14833684	0	2	50,50	0,3367
chrI	14847612	14848120	neuron_readCounts:582;intestine_readCounts:24;neuron_PSI:0.439;intestine_PSI:0.091	950	+	14847612	14848120	0	2	50,50	0,458
chrI	14847612	14848618	neuron_readCounts:190;intestine_readCounts:9;neuron_PSI:0.168;intestine_PSI:0.027	950	+	14847612	14848618	0	2	50,50	0,956
chrI	14847612	14847798	neuron_readCounts:536;intestine_readCounts:238;neuron_PSI:0.393;intestine_PSI:0.882	950	+	14847612	14847798	0	2	50,50	0,136
chrI	14880796	14881101	neuron_readCounts:1234;intestine_readCounts:256;neuron_PSI:0.455;intestine_PSI:0.209	950	-	14880796	14881101	0	2	50,50	0,255
chrI	14880081	14881101	neuron_readCounts:148;intestine_readCounts:26;neuron_PSI:0.055;intestine_PSI:0.026	950	-	14880081	14881101	0	2	50,50	0,970
chrI	14878943	14881101	neuron_readCounts:1321;intestine_readCounts:885;neuron_PSI:0.49;intestine_PSI:0.766	950	-	14878943	14881101	0	2	50,50	0,2108
chrI	14878943	14880064	neuron_readCounts:2226;intestine_readCounts:316;neuron_PSI:0.593;intestine_PSI:0.234	950	-	14878943	14880064	0	2	50,50	0,1071
chrV	20012137	20013332	neuron_readCounts:659;intestine_readCounts:1658;neuron_PSI:0.206;intestine_PSI:0.95	950	+	20012137	20013332	0	2	50,50	0,1145
chrV	20012137	20014933	neuron_readCounts:2915;intestine_readCounts:85;neuron_PSI:0.794;intestine_PSI:0.05	950	+	20012137	20014933	0	2	50,50	0,2746
chrX	15270698	15271276	neuron_readCounts:167;intestine_readCounts:186;neuron_PSI:0.172;intestine_PSI:0.336	950	-	15270698	15271276	0	2	50,50	0,528
chrX	15271073	15271276	neuron_readCounts:572;intestine_readCounts:42;neuron_PSI:0.584;intestine_PSI:0.08	950	-	15271073	15271276	0	2	50,50	0,153
chrX	15269676	15271276	neuron_readCounts:239;intestine_readCounts:338;neuron_PSI:0.244;intestine_PSI:0.585	950	-	15269676	15271276	0	2	50,50	0,1550
chrV	20783172	20783787	neuron_readCounts:8032;intestine_readCounts:1123;neuron_PSI:0.976;intestine_PSI:0.78	950	+	20783172	20783787	0	2	50,50	0,565
chrV	20783172	20783375	neuron_readCounts:194;intestine_readCounts:312;neuron_PSI:0.024;intestine_PSI:0.22	950	+	20783172	20783375	0	2	50,50	0,153
chrV	20783478	20783787	neuron_readCounts:163;intestine_readCounts:620;neuron_PSI:0.02;intestine_PSI:0.341	950	+	20783478	20783787	0	2	50,50	0,259

## Sheet: muscle_vs_intestine
track name=muscle_vs_intestine description='muscle_vs_intestine_tissue_differential'
chrII	62948	63127	muscle_readCounts:79;intestine_readCounts:202;muscle_PSI:0.889;intestine_PSI:0.393	950	+	62948	63127	0	2	50,50	0,129
chrII	61635	63127	muscle_readCounts:9;intestine_readCounts:249;muscle_PSI:0.111;intestine_PSI:0.607	950	+	61635	63127	0	2	50,50	0,1442
chrII	167028	167223	muscle_readCounts:367;intestine_readCounts:134;muscle_PSI:0.818;intestine_PSI:0.225	950	+	167028	167223	0	2	50,50	0,145
chrII	167028	167953	muscle_readCounts:59;intestine_readCounts:393;muscle_PSI:0.139;intestine_PSI:0.731	950	+	167028	167953	0	2	50,50	0,875
chrII	167028	167944	muscle_readCounts:17;intestine_readCounts:33;muscle_PSI:0.043;intestine_PSI:0.044	950	+	167028	167944	0	2	50,50	0,866
chrII	167336	167953	muscle_readCounts:626;intestine_readCounts:238;muscle_PSI:0.914;intestine_PSI:0.314	950	+	167336	167953	0	2	50,50	0,567
chrV	208102	208252	muscle_readCounts:650;intestine_readCounts:454;muscle_PSI:0.743;intestine_PSI:0.144	950	+	208102	208252	0	2	50,50	0,100
chrV	208102	208503	muscle_readCounts:215;intestine_readCounts:3150;muscle_PSI:0.257;intestine_PSI:0.856	950	+	208102	208503	0	2	50,50	0,351
chrIV	630600	630744	muscle_readCounts:47;intestine_readCounts:15;muscle_PSI:0.327;intestine_PSI:0.088	950	+	630600	630744	0	2	50,50	0,94
chrIV	630591	630744	muscle_readCounts:89;intestine_readCounts:115;muscle_PSI:0.673;intestine_PSI:0.912	950	+	630591	630744	0	2	50,50	0,103
chrX	612334	612757	muscle_readCounts:44;intestine_readCounts:202;muscle_PSI:0.008;intestine_PSI:0.316	950	-	612334	612757	0	2	50,50	0,373
chrX	611565	612757	muscle_readCounts:3919;intestine_readCounts:408;muscle_PSI:0.992;intestine_PSI:0.684	950	-	611565	612757	0	2	50,50	0,1142
chrX	611565	612404	muscle_readCounts:40;intestine_readCounts:181;muscle_PSI:0.008;intestine_PSI:0.293	950	-	611565	612404	0	2	50,50	0,789
chrIII	653133	653303	muscle_readCounts:14;intestine_readCounts:574;muscle_PSI:0.178;intestine_PSI:0.727	950	+	653133	653303	0	2	50,50	0,120
chrIII	649490	653303	muscle_readCounts:69;intestine_readCounts:181;muscle_PSI:0.822;intestine_PSI:0.273	950	+	649490	653303	0	2	50,50	0,3763
chrX	720873	722385	muscle_readCounts:216;intestine_readCounts:89;muscle_PSI:0.576;intestine_PSI:0.258	950	-	720873	722385	0	2	50,50	0,1462
chrX	722228	722385	muscle_readCounts:164;intestine_readCounts:261;muscle_PSI:0.424;intestine_PSI:0.742	950	-	722228	722385	0	2	50,50	0,107
chrX	720873	722202	muscle_readCounts:130;intestine_readCounts:280;muscle_PSI:0.365;intestine_PSI:0.756	950	-	720873	722202	0	2	50,50	0,1279
chrIV	751238	751632	muscle_readCounts:199;intestine_readCounts:68;muscle_PSI:0.648;intestine_PSI:0.366	950	+	751238	751632	0	2	50,50	0,344
chrIV	751384	751632	muscle_readCounts:117;intestine_readCounts:97;muscle_PSI:0.352;intestine_PSI:0.634	950	+	751384	751632	0	2	50,50	0,198
chrX	1500808	1501823	muscle_readCounts:183;intestine_readCounts:295;muscle_PSI:0.682;intestine_PSI:0.923	950	-	1500808	1501823	0	2	50,50	0,965
chrX	1500808	1501639	muscle_readCounts:84;intestine_readCounts:26;muscle_PSI:0.318;intestine_PSI:0.077	950	-	1500808	1501639	0	2	50,50	0,781
chrII	1236339	1239998	muscle_readCounts:132;intestine_readCounts:63;muscle_PSI:0.086;intestine_PSI:0.488	950	-	1236339	1239998	0	2	50,50	0,3609
chrII	1236339	1236496	muscle_readCounts:25;intestine_readCounts:22;muscle_PSI:0.045;intestine_PSI:0.119	950	-	1236339	1236496	0	2	50,50	0,107
chrII	1236339	1237873	muscle_readCounts:744;intestine_readCounts:46;muscle_PSI:0.868;intestine_PSI:0.392	950	-	1236339	1237873	0	2	50,50	0,1484
chrI	2203814	2204974	muscle_readCounts:66;intestine_readCounts:495;muscle_PSI:0.235;intestine_PSI:0.828	950	+	2203814	2204974	0	2	50,50	0,1110
chrI	2203814	2205262	muscle_readCounts:234;intestine_readCounts:108;muscle_PSI:0.765;intestine_PSI:0.172	950	+	2203814	2205262	0	2	50,50	0,1398
chrV	1475091	1475361	muscle_readCounts:1155;intestine_readCounts:2519;muscle_PSI:0.034;intestine_PSI:0.364	950	+	1475091	1475361	0	2	50,50	0,220
chrV	1475091	1476931	muscle_readCounts:40497;intestine_readCounts:3890;muscle_PSI:0.966;intestine_PSI:0.636	950	+	1475091	1476931	0	2	50,50	0,1790
chrIII	1933252	1934233	muscle_readCounts:37;intestine_readCounts:28;muscle_PSI:0.472;intestine_PSI:0.211	950	+	1933252	1934233	0	2	50,50	0,931
chrIII	1932324	1934233	muscle_readCounts:40;intestine_readCounts:94;muscle_PSI:0.528;intestine_PSI:0.789	950	+	1932324	1934233	0	2	50,50	0,1859
chrIII	1940779	1941587	muscle_readCounts:92;intestine_readCounts:116;muscle_PSI:0.588;intestine_PSI:0.892	950	-	1940779	1941587	0	2	50,50	0,758
chrIII	1940779	1943514	muscle_readCounts:67;intestine_readCounts:12;muscle_PSI:0.412;intestine_PSI:0.108	950	-	1940779	1943514	0	2	50,50	0,2685
chrIII	1939604	1940708	muscle_readCounts:106;intestine_readCounts:146;muscle_PSI:0.68;intestine_PSI:0.931	950	-	1939604	1940708	0	2	50,50	0,1054
chrIII	1939604	1943514	muscle_readCounts:37;intestine_readCounts:4;muscle_PSI:0.267;intestine_PSI:0.05	950	-	1939604	1943514	0	2	50,50	0,3860
chrIII	1939604	1941587	muscle_readCounts:10;intestine_readCounts:2;muscle_PSI:0.052;intestine_PSI:0.019	950	-	1939604	1941587	0	2	50,50	0,1933
chrIV	3105254	3110032	muscle_readCounts:110;intestine_readCounts:854;muscle_PSI:0.796;intestine_PSI:0.467	950	-	3105254	3110032	0	2	50,50	0,4728
chrIV	3105254	3116671	muscle_readCounts:33;intestine_readCounts:1031;muscle_PSI:0.204;intestine_PSI:0.533	950	-	3105254	3116671	0	2	50,50	0,11367
chrI	3421191	3422333	muscle_readCounts:187;intestine_readCounts:1299;muscle_PSI:0.029;intestine_PSI:0.569	950	+	3421191	3422333	0	2	50,50	0,1092
chrI	3421191	3423929	muscle_readCounts:9987;intestine_readCounts:714;muscle_PSI:0.971;intestine_PSI:0.431	950	+	3421191	3423929	0	2	50,50	0,2688
chrX	3556288	3556489	muscle_readCounts:8;intestine_readCounts:148;muscle_PSI:0.06;intestine_PSI:0.546	950	+	3556288	3556489	0	2	50,50	0,151
chrX	3552876	3556489	muscle_readCounts:136;intestine_readCounts:124;muscle_PSI:0.94;intestine_PSI:0.454	950	+	3552876	3556489	0	2	50,50	0,3563
chrI	3667729	3667884	muscle_readCounts:8;intestine_readCounts:378;muscle_PSI:0.067;intestine_PSI:0.588	950	-	3667729	3667884	0	2	50,50	0,105
chrI	3667275	3667884	muscle_readCounts:107;intestine_readCounts:271;muscle_PSI:0.933;intestine_PSI:0.412	950	-	3667275	3667884	0	2	50,50	0,559
chrI	3667275	3667775	muscle_readCounts:15;intestine_readCounts:357;muscle_PSI:0.111;intestine_PSI:0.385	950	-	3667275	3667775	0	2	50,50	0,450
chrI	3667275	3667745	muscle_readCounts:12;intestine_readCounts:281;muscle_PSI:0.087;intestine_PSI:0.303	950	-	3667275	3667745	0	2	50,50	0,420
chrV	3710068	3710747	muscle_readCounts:194;intestine_readCounts:68;muscle_PSI:0.649;intestine_PSI:0.087	950	+	3710068	3710747	0	2	50,50	0,629
chrV	3710068	3712402	muscle_readCounts:144;intestine_readCounts:732;muscle_PSI:0.351;intestine_PSI:0.913	950	+	3710068	3712402	0	2	50,50	0,2284
chrV	3710958	3712402	muscle_readCounts:357;intestine_readCounts:319;muscle_PSI:0.763;intestine_PSI:0.286	950	+	3710958	3712402	0	2	50,50	0,1394
chrIV	5848898	5849367	muscle_readCounts:128;intestine_readCounts:388;muscle_PSI:0.524;intestine_PSI:0.917	950	+	5848898	5849367	0	2	50,50	0,419
chrIV	5848898	5849274	muscle_readCounts:60;intestine_readCounts:25;muscle_PSI:0.476;intestine_PSI:0.083	950	+	5848898	5849274	0	2	50,50	0,326
chrIII	5971730	5972611	muscle_readCounts:2275;intestine_readCounts:2517;muscle_PSI:0.079;intestine_PSI:0.493	950	-	5971730	5972611	0	2	50,50	0,831
chrIII	5971730	5972632	muscle_readCounts:142;intestine_readCounts:278;muscle_PSI:0.005;intestine_PSI:0.048	950	-	5971730	5972632	0	2	50,50	0,852
chrIII	5971730	5972558	muscle_readCounts:25405;intestine_readCounts:2006;muscle_PSI:0.916;intestine_PSI:0.46	950	-	5971730	5972558	0	2	50,50	0,778
chrI	4010802	4015990	muscle_readCounts:113;intestine_readCounts:21;muscle_PSI:0.764;intestine_PSI:0.188	950	-	4010802	4015990	0	2	50,50	0,5138
chrI	4015726	4015990	muscle_readCounts:28;intestine_readCounts:90;muscle_PSI:0.236;intestine_PSI:0.812	950	-	4015726	4015990	0	2	50,50	0,214
chrIII	6221030	6223772	muscle_readCounts:28;intestine_readCounts:92;muscle_PSI:0.59;intestine_PSI:0.939	950	+	6221030	6223772	0	2	50,50	0,2692
chrIII	6221021	6223772	muscle_readCounts:20;intestine_readCounts:7;muscle_PSI:0.41;intestine_PSI:0.061	950	+	6221021	6223772	0	2	50,50	0,2701
chrIII	6226517	6226891	muscle_readCounts:27;intestine_readCounts:56;muscle_PSI:0.525;intestine_PSI:0.126	950	-	6226517	6226891	0	2	50,50	0,324
chrIII	6226205	6226891	muscle_readCounts:28;intestine_readCounts:367;muscle_PSI:0.475;intestine_PSI:0.874	950	-	6226205	6226891	0	2	50,50	0,636
chrIV	4451615	4457708	muscle_readCounts:9;intestine_readCounts:53;muscle_PSI:0.137;intestine_PSI:0.62	950	+	4451615	4457708	0	2	50,50	0,6043
chrIV	4454698	4457708	muscle_readCounts:70;intestine_readCounts:32;muscle_PSI:0.863;intestine_PSI:0.38	950	+	4454698	4457708	0	2	50,50	0,2960
chrV	4505070	4505878	muscle_readCounts:54;intestine_readCounts:348;muscle_PSI:0.161;intestine_PSI:0.441	950	+	4505070	4505878	0	2	50,50	0,758
chrV	4505466	4505878	muscle_readCounts:277;intestine_readCounts:434;muscle_PSI:0.839;intestine_PSI:0.559	950	+	4505466	4505878	0	2	50,50	0,362
chrI	3422383	3423929	muscle_readCounts:44;intestine_readCounts:219;muscle_PSI:0.016;intestine_PSI:0.116	950	+	3422383	3423929	0	2	50,50	0,1496
chrI	3423305	3423929	muscle_readCounts:176;intestine_readCounts:1124;muscle_PSI:0.021;intestine_PSI:0.527	950	+	3423305	3423929	0	2	50,50	0,574
chrII	4952481	4952696	muscle_readCounts:6;intestine_readCounts:45;muscle_PSI:0.06;intestine_PSI:0.264	950	+	4952481	4952696	0	2	50,50	0,165
chrII	4952481	4952889	muscle_readCounts:69;intestine_readCounts:72;muscle_PSI:0.788;intestine_PSI:0.41	950	+	4952481	4952889	0	2	50,50	0,358
chrII	4952481	4953210	muscle_readCounts:13;intestine_readCounts:53;muscle_PSI:0.152;intestine_PSI:0.326	950	+	4952481	4953210	0	2	50,50	0,679
chrIII	5010939	5011189	muscle_readCounts:144;intestine_readCounts:500;muscle_PSI:0.746;intestine_PSI:0.96	950	-	5010939	5011189	0	2	50,50	0,200
chrIII	5010939	5011522	muscle_readCounts:59;intestine_readCounts:29;muscle_PSI:0.254;intestine_PSI:0.04	950	-	5010939	5011522	0	2	50,50	0,533
chrIII	5019485	5020243	muscle_readCounts:59;intestine_readCounts:36;muscle_PSI:0.436;intestine_PSI:0.077	950	+	5019485	5020243	0	2	50,50	0,708
chrIII	5019485	5019888	muscle_readCounts:44;intestine_readCounts:97;muscle_PSI:0.24;intestine_PSI:0.183	950	+	5019485	5019888	0	2	50,50	0,353
chrIII	5019485	5019894	muscle_readCounts:57;intestine_readCounts:357;muscle_PSI:0.324;intestine_PSI:0.739	950	+	5019485	5019894	0	2	50,50	0,359
chrV	5112577	5113057	muscle_readCounts:2;intestine_readCounts:1373;muscle_PSI:0.024;intestine_PSI:0.998	950	-	5112577	5113057	0	2	50,50	0,430
chrV	5111901	5113057	muscle_readCounts:84;intestine_readCounts:2;muscle_PSI:0.976;intestine_PSI:0.002	950	-	5111901	5113057	0	2	50,50	0,1106
chrV	5111901	5112589	muscle_readCounts:2;intestine_readCounts:1341;muscle_PSI:0.024;intestine_PSI:0.998	950	-	5111901	5112589	0	2	50,50	0,638
chrII	5206934	5207362	muscle_readCounts:71;intestine_readCounts:4;muscle_PSI:0.571;intestine_PSI:0.02	950	+	5206934	5207362	0	2	50,50	0,378
chrII	5206934	5207716	muscle_readCounts:53;intestine_readCounts:219;muscle_PSI:0.429;intestine_PSI:0.98	950	+	5206934	5207716	0	2	50,50	0,732
chrII	5207304	5207716	muscle_readCounts:77;intestine_readCounts:6;muscle_PSI:0.614;intestine_PSI:0.026	950	+	5207304	5207716	0	2	50,50	0,362
chrI	5290468	5291543	muscle_readCounts:77;intestine_readCounts:117;muscle_PSI:0.792;intestine_PSI:0.396	950	-	5290468	5291543	0	2	50,50	0,1025
chrI	5290468	5290667	muscle_readCounts:22;intestine_readCounts:195;muscle_PSI:0.208;intestine_PSI:0.604	950	-	5290468	5290667	0	2	50,50	0,149
chrIII	8007958	8008111	muscle_readCounts:40;intestine_readCounts:152;muscle_PSI:0.37;intestine_PSI:0.64	950	-	8007958	8008111	0	2	50,50	0,103
chrIII	8007952	8008111	muscle_readCounts:67;intestine_readCounts:97;muscle_PSI:0.63;intestine_PSI:0.36	950	-	8007952	8008111	0	2	50,50	0,109
chrIV	5357372	5357925	muscle_readCounts:169;intestine_readCounts:241;muscle_PSI:0.559;intestine_PSI:0.206	950	-	5357372	5357925	0	2	50,50	0,503
chrIV	5357759	5357925	muscle_readCounts:170;intestine_readCounts:819;muscle_PSI:0.441;intestine_PSI:0.794	950	-	5357759	5357925	0	2	50,50	0,116
chrI	4016921	4020308	muscle_readCounts:57;intestine_readCounts:8;muscle_PSI:0.517;intestine_PSI:0.062	950	-	4016921	4020308	0	2	50,50	0,3337
chrI	4016921	4017373	muscle_readCounts:8;intestine_readCounts:6;muscle_PSI:0.072;intestine_PSI:0.046	950	-	4016921	4017373	0	2	50,50	0,402
chrI	4016921	4021278	muscle_readCounts:45;intestine_readCounts:127;muscle_PSI:0.411;intestine_PSI:0.892	950	-	4016921	4021278	0	2	50,50	0,4307
chrIV	8085228	8085802	muscle_readCounts:20;intestine_readCounts:249;muscle_PSI:0.262;intestine_PSI:0.603	950	-	8085228	8085802	0	2	50,50	0,524
chrIV	8085183	8085802	muscle_readCounts:57;intestine_readCounts:163;muscle_PSI:0.738;intestine_PSI:0.397	950	-	8085183	8085802	0	2	50,50	0,569
chrII	5426546	5427623	muscle_readCounts:380;intestine_readCounts:1622;muscle_PSI:0.409;intestine_PSI:0.827	950	-	5426546	5427623	0	2	50,50	0,1027
chrII	5427431	5427623	muscle_readCounts:564;intestine_readCounts:335;muscle_PSI:0.591;intestine_PSI:0.173	950	-	5427431	5427623	0	2	50,50	0,142
chrII	5426546	5427481	muscle_readCounts:520;intestine_readCounts:416;muscle_PSI:0.567;intestine_PSI:0.206	950	-	5426546	5427481	0	2	50,50	0,885
chrI	5569518	5569754	muscle_readCounts:1727;intestine_readCounts:1594;muscle_PSI:0.816;intestine_PSI:0.217	950	-	5569518	5569754	0	2	50,50	0,186
chrI	5569149	5569754	muscle_readCounts:404;intestine_readCounts:6548;muscle_PSI:0.184;intestine_PSI:0.783	950	-	5569149	5569754	0	2	50,50	0,555
chrI	5569149	5569594	muscle_readCounts:1577;intestine_readCounts:1421;muscle_PSI:0.802;intestine_PSI:0.201	950	-	5569149	5569594	0	2	50,50	0,395
chrII	5590561	5590842	muscle_readCounts:457;intestine_readCounts:826;muscle_PSI:0.565;intestine_PSI:0.832	950	-	5590561	5590842	0	2	50,50	0,231
chrII	5589877	5590842	muscle_readCounts:296;intestine_readCounts:155;muscle_PSI:0.435;intestine_PSI:0.168	950	-	5589877	5590842	0	2	50,50	0,915
chrII	5591435	5591624	muscle_readCounts:224;intestine_readCounts:114;muscle_PSI:0.566;intestine_PSI:0.21	950	-	5591435	5591624	0	2	50,50	0,139
chrII	5590934	5591624	muscle_readCounts:180;intestine_readCounts:448;muscle_PSI:0.434;intestine_PSI:0.79	950	-	5590934	5591624	0	2	50,50	0,640
chrI	8422757	8422903	muscle_readCounts:30;intestine_readCounts:194;muscle_PSI:0.446;intestine_PSI:0.791	950	+	8422757	8422903	0	2	50,50	0,96
chrI	8422757	8422909	muscle_readCounts:29;intestine_readCounts:85;muscle_PSI:0.554;intestine_PSI:0.209	950	+	8422757	8422909	0	2	50,50	0,102
chrIII	5880428	5880597	muscle_readCounts:26;intestine_readCounts:90;muscle_PSI:0.433;intestine_PSI:0.733	950	+	5880428	5880597	0	2	50,50	0,119
chrIII	5879983	5881102	muscle_readCounts:34;intestine_readCounts:35;muscle_PSI:0.567;intestine_PSI:0.267	950	+	5879983	5881102	0	2	50,50	0,1069
chrIII	5890627	5891373	muscle_readCounts:85;intestine_readCounts:344;muscle_PSI:0.015;intestine_PSI:0.427	950	-	5890627	5891373	0	2	50,50	0,696
chrIII	5889824	5891373	muscle_readCounts:6953;intestine_readCounts:481;muscle_PSI:0.985;intestine_PSI:0.573	950	-	5889824	5891373	0	2	50,50	0,1499
chrIII	5895629	5899855	muscle_readCounts:124;intestine_readCounts:109;muscle_PSI:0.062;intestine_PSI:0.365	950	-	5895629	5899855	0	2	50,50	0,4176
chrIII	5895629	5896010	muscle_readCounts:1878;intestine_readCounts:266;muscle_PSI:0.938;intestine_PSI:0.635	950	-	5895629	5896010	0	2	50,50	0,331
chrII	5947265	5951470	muscle_readCounts:30;intestine_readCounts:291;muscle_PSI:0.318;intestine_PSI:0.723	950	-	5947265	5951470	0	2	50,50	0,4155
chrII	5947265	5948672	muscle_readCounts:73;intestine_readCounts:57;muscle_PSI:0.682;intestine_PSI:0.277	950	-	5947265	5948672	0	2	50,50	0,1357
chrII	8931044	8932155	muscle_readCounts:70;intestine_readCounts:139;muscle_PSI:0.573;intestine_PSI:0.942	950	+	8931044	8932155	0	2	50,50	0,1061
chrII	8931140	8932155	muscle_readCounts:52;intestine_readCounts:11;muscle_PSI:0.427;intestine_PSI:0.058	950	+	8931140	8932155	0	2	50,50	0,965
chrIII	5971730	5972946	muscle_readCounts:65;intestine_readCounts:304;muscle_PSI:0.003;intestine_PSI:0.06	950	-	5971730	5972946	0	2	50,50	0,1166
chrIII	5972926	5973356	muscle_readCounts:59;intestine_readCounts:397;muscle_PSI:0.641;intestine_PSI:0.99	950	-	5972926	5973356	0	2	50,50	0,380
chrIII	5972926	5973597	muscle_readCounts:37;intestine_readCounts:3;muscle_PSI:0.359;intestine_PSI:0.01	950	-	5972926	5973597	0	2	50,50	0,621
chrV	4504180	4504361	muscle_readCounts:13;intestine_readCounts:5;muscle_PSI:0.053;intestine_PSI:0.012	950	+	4504180	4504361	0	2	50,50	0,131
chrV	4504180	4505408	muscle_readCounts:193;intestine_readCounts:161;muscle_PSI:0.801;intestine_PSI:0.32	950	+	4504180	4505408	0	2	50,50	0,1178
chrV	4504180	4505024	muscle_readCounts:35;intestine_readCounts:396;muscle_PSI:0.145;intestine_PSI:0.668	950	+	4504180	4505024	0	2	50,50	0,794
chrV	6121586	6121861	muscle_readCounts:535;intestine_readCounts:300;muscle_PSI:0.962;intestine_PSI:0.662	950	-	6121586	6121861	0	2	50,50	0,225
chrV	6121700	6121861	muscle_readCounts:22;intestine_readCounts:115;muscle_PSI:0.038;intestine_PSI:0.338	950	-	6121700	6121861	0	2	50,50	0,111
chrIII	6130440	6130830	muscle_readCounts:90;intestine_readCounts:293;muscle_PSI:0.2;intestine_PSI:0.857	950	-	6130440	6130830	0	2	50,50	0,340
chrIII	6130000	6130830	muscle_readCounts:435;intestine_readCounts:79;muscle_PSI:0.8;intestine_PSI:0.143	950	-	6130000	6130830	0	2	50,50	0,780
chrIII	6130000	6130261	muscle_readCounts:160;intestine_readCounts:441;muscle_PSI:0.338;intestine_PSI:0.902	950	-	6130000	6130261	0	2	50,50	0,211
chrIII	6131697	6136164	muscle_readCounts:202;intestine_readCounts:86;muscle_PSI:0.93;intestine_PSI:0.635	950	-	6131697	6136164	0	2	50,50	0,4417
chrIII	6131697	6132827	muscle_readCounts:22;intestine_readCounts:50;muscle_PSI:0.07;intestine_PSI:0.365	950	-	6131697	6132827	0	2	50,50	0,1080
chrIII	6163143	6164342	muscle_readCounts:66;intestine_readCounts:1103;muscle_PSI:0.135;intestine_PSI:0.917	950	+	6163143	6164342	0	2	50,50	0,1149
chrIII	6163143	6163448	muscle_readCounts:318;intestine_readCounts:89;muscle_PSI:0.865;intestine_PSI:0.083	950	+	6163143	6163448	0	2	50,50	0,255
chrIII	6163569	6164342	muscle_readCounts:489;intestine_readCounts:67;muscle_PSI:0.904;intestine_PSI:0.074	950	+	6163569	6164342	0	2	50,50	0,723
chrIII	6166414	6166568	muscle_readCounts:679;intestine_readCounts:492;muscle_PSI:0.853;intestine_PSI:0.451	950	-	6166414	6166568	0	2	50,50	0,104
chrIII	6166245	6166568	muscle_readCounts:148;intestine_readCounts:655;muscle_PSI:0.147;intestine_PSI:0.549	950	-	6166245	6166568	0	2	50,50	0,273
chrIII	6166245	6166490	muscle_readCounts:697;intestine_readCounts:504;muscle_PSI:0.856;intestine_PSI:0.455	950	-	6166245	6166490	0	2	50,50	0,195
chrII	6197669	6197855	muscle_readCounts:558;intestine_readCounts:4493;muscle_PSI:0.752;intestine_PSI:0.965	950	+	6197669	6197855	0	2	50,50	0,136
chrII	6197669	6198076	muscle_readCounts:169;intestine_readCounts:157;muscle_PSI:0.248;intestine_PSI:0.035	950	+	6197669	6198076	0	2	50,50	0,357
chrII	6197918	6198076	muscle_readCounts:521;intestine_readCounts:4720;muscle_PSI:0.727;intestine_PSI:0.964	950	+	6197918	6198076	0	2	50,50	0,108
chrV	6216368	6216838	muscle_readCounts:2055;intestine_readCounts:3307;muscle_PSI:0.911;intestine_PSI:0.644	950	+	6216368	6216838	0	2	50,50	0,420
chrV	6216368	6216529	muscle_readCounts:227;intestine_readCounts:1543;muscle_PSI:0.089;intestine_PSI:0.356	950	+	6216368	6216529	0	2	50,50	0,111
chrV	6216444	6216838	muscle_readCounts:210;intestine_readCounts:1896;muscle_PSI:0.082;intestine_PSI:0.401	950	+	6216444	6216838	0	2	50,50	0,344
chrI	9621233	9621384	muscle_readCounts:44;intestine_readCounts:1363;muscle_PSI:0.446;intestine_PSI:0.863	950	+	9621233	9621384	0	2	50,50	0,101
chrI	9621233	9621375	muscle_readCounts:62;intestine_readCounts:245;muscle_PSI:0.554;intestine_PSI:0.137	950	+	9621233	9621375	0	2	50,50	0,92
chrI	9621408	9621548	muscle_readCounts:115;intestine_readCounts:325;muscle_PSI:0.56;intestine_PSI:0.15	950	+	9621408	9621548	0	2	50,50	0,90
chrI	9621408	9621557	muscle_readCounts:63;intestine_readCounts:1741;muscle_PSI:0.44;intestine_PSI:0.85	950	+	9621408	9621557	0	2	50,50	0,99
chrIII	6456524	6457173	muscle_readCounts:49;intestine_readCounts:384;muscle_PSI:0.606;intestine_PSI:0.932	950	+	6456524	6457173	0	2	50,50	0,599
chrIII	6456524	6457465	muscle_readCounts:24;intestine_readCounts:28;muscle_PSI:0.394;intestine_PSI:0.068	950	+	6456524	6457465	0	2	50,50	0,891
chrII	6586120	6586314	muscle_readCounts:124;intestine_readCounts:950;muscle_PSI:0.575;intestine_PSI:0.953	950	-	6586120	6586314	0	2	50,50	0,144
chrII	6586062	6586314	muscle_readCounts:87;intestine_readCounts:47;muscle_PSI:0.425;intestine_PSI:0.047	950	-	6586062	6586314	0	2	50,50	0,202
chrII	6586062	6586211	muscle_readCounts:169;intestine_readCounts:1269;muscle_PSI:0.635;intestine_PSI:0.965	950	-	6586062	6586211	0	2	50,50	0,99
chrV	6889260	6889854	muscle_readCounts:379;intestine_readCounts:204;muscle_PSI:0.922;intestine_PSI:0.7	950	+	6889260	6889854	0	2	50,50	0,544
chrV	6889632	6889854	muscle_readCounts:32;intestine_readCounts:87;muscle_PSI:0.078;intestine_PSI:0.3	950	+	6889632	6889854	0	2	50,50	0,172
chrIV	6914185	6914859	muscle_readCounts:128;intestine_readCounts:663;muscle_PSI:0.608;intestine_PSI:0.915	950	+	6914185	6914859	0	2	50,50	0,624
chrIV	6914185	6915127	muscle_readCounts:85;intestine_readCounts:72;muscle_PSI:0.392;intestine_PSI:0.085	950	+	6914185	6915127	0	2	50,50	0,892
chrIII	6927666	6928609	muscle_readCounts:117;intestine_readCounts:45;muscle_PSI:0.724;intestine_PSI:0.159	950	-	6927666	6928609	0	2	50,50	0,893
chrIII	6927775	6928609	muscle_readCounts:26;intestine_readCounts:200;muscle_PSI:0.276;intestine_PSI:0.841	950	-	6927775	6928609	0	2	50,50	0,784
chrIII	6927666	6927815	muscle_readCounts:14;intestine_readCounts:158;muscle_PSI:0.181;intestine_PSI:0.796	950	-	6927666	6927815	0	2	50,50	0,99
chrX	10400192	10400526	muscle_readCounts:148;intestine_readCounts:82;muscle_PSI:0.814;intestine_PSI:0.405	950	+	10400192	10400526	0	2	50,50	0,284
chrX	10400210	10400526	muscle_readCounts:38;intestine_readCounts:120;muscle_PSI:0.186;intestine_PSI:0.595	950	+	10400210	10400526	0	2	50,50	0,266
chrV	7025759	7026164	muscle_readCounts:63;intestine_readCounts:166;muscle_PSI:0.226;intestine_PSI:0.763	950	-	7025759	7026164	0	2	50,50	0,355
chrV	7025759	7026488	muscle_readCounts:205;intestine_readCounts:51;muscle_PSI:0.877;intestine_PSI:0.38	950	-	7025759	7026488	0	2	50,50	0,679
chrV	7026241	7026488	muscle_readCounts:23;intestine_readCounts:83;muscle_PSI:0.123;intestine_PSI:0.62	950	-	7026241	7026488	0	2	50,50	0,197
chrX	10607365	10608492	muscle_readCounts:53;intestine_readCounts:49;muscle_PSI:0.533;intestine_PSI:0.13	950	-	10607365	10608492	0	2	50,50	0,1077
chrX	10607365	10608480	muscle_readCounts:44;intestine_readCounts:297;muscle_PSI:0.467;intestine_PSI:0.87	950	-	10607365	10608480	0	2	50,50	0,1065
chrX	7239535	7240136	muscle_readCounts:616;intestine_readCounts:3572;muscle_PSI:0.322;intestine_PSI:0.926	950	-	7239535	7240136	0	2	50,50	0,551
chrX	7239792	7240136	muscle_readCounts:1282;intestine_readCounts:286;muscle_PSI:0.678;intestine_PSI:0.074	950	-	7239792	7240136	0	2	50,50	0,294
chrX	7239535	7239874	muscle_readCounts:1267;intestine_readCounts:239;muscle_PSI:0.675;intestine_PSI:0.063	950	-	7239535	7239874	0	2	50,50	0,289
chrIII	10943099	10945688	muscle_readCounts:156;intestine_readCounts:628;muscle_PSI:0.449;intestine_PSI:0.734	950	+	10943099	10945688	0	2	50,50	0,2539
chrIII	10943039	10945754	muscle_readCounts:22;intestine_readCounts:23;muscle_PSI:0.064;intestine_PSI:0.023	950	+	10943039	10945754	0	2	50,50	0,2665
chrIII	10943039	10945688	muscle_readCounts:169;intestine_readCounts:218;muscle_PSI:0.487;intestine_PSI:0.242	950	+	10943039	10945688	0	2	50,50	0,2599
chrI	7313849	7314258	muscle_readCounts:3353;intestine_readCounts:33030;muscle_PSI:0.28;intestine_PSI:0.922	950	-	7313849	7314258	0	2	50,50	0,359
chrI	7313849	7314006	muscle_readCounts:7550;intestine_readCounts:1918;muscle_PSI:0.72;intestine_PSI:0.078	950	-	7313849	7314006	0	2	50,50	0,107
chrII	7495685	7496085	muscle_readCounts:2150;intestine_readCounts:455;muscle_PSI:0.976;intestine_PSI:0.403	950	+	7495685	7496085	0	2	50,50	0,350
chrII	7495909	7496085	muscle_readCounts:57;intestine_readCounts:914;muscle_PSI:0.024;intestine_PSI:0.597	950	+	7495909	7496085	0	2	50,50	0,126
chrI	5634185	5634452	muscle_readCounts:76;intestine_readCounts:473;muscle_PSI:0.46;intestine_PSI:0.848	950	+	5634185	5634452	0	2	50,50	0,217
chrI	5634185	5635691	muscle_readCounts:73;intestine_readCounts:29;muscle_PSI:0.478;intestine_PSI:0.062	950	+	5634185	5635691	0	2	50,50	0,1456
chrI	5634185	5636766	muscle_readCounts:9;intestine_readCounts:41;muscle_PSI:0.062;intestine_PSI:0.09	950	+	5634185	5636766	0	2	50,50	0,2531
chrI	5635349	5636766	muscle_readCounts:72;intestine_readCounts:536;muscle_PSI:0.428;intestine_PSI:0.832	950	+	5635349	5636766	0	2	50,50	0,1367
chrI	5635642	5636766	muscle_readCounts:77;intestine_readCounts:71;muscle_PSI:0.51;intestine_PSI:0.105	950	+	5635642	5636766	0	2	50,50	0,1074
chrII	7683477	7683725	muscle_readCounts:101;intestine_readCounts:407;muscle_PSI:0.666;intestine_PSI:0.964	950	+	7683477	7683725	0	2	50,50	0,198
chrII	7683477	7684015	muscle_readCounts:47;intestine_readCounts:20;muscle_PSI:0.334;intestine_PSI:0.036	950	+	7683477	7684015	0	2	50,50	0,488
chrI	7685971	7686640	muscle_readCounts:13;intestine_readCounts:1457;muscle_PSI:0.062;intestine_PSI:0.958	950	-	7685971	7686640	0	2	50,50	0,619
chrI	7685971	7686207	muscle_readCounts:244;intestine_readCounts:67;muscle_PSI:0.938;intestine_PSI:0.042	950	-	7685971	7686207	0	2	50,50	0,186
chrIV	7827412	7827618	muscle_readCounts:301;intestine_readCounts:608;muscle_PSI:0.489;intestine_PSI:0.127	950	-	7827412	7827618	0	2	50,50	0,156
chrIV	7827055	7827618	muscle_readCounts:423;intestine_readCounts:4934;muscle_PSI:0.511;intestine_PSI:0.873	950	-	7827055	7827618	0	2	50,50	0,513
chrIV	7827055	7827470	muscle_readCounts:280;intestine_readCounts:696;muscle_PSI:0.485;intestine_PSI:0.145	950	-	7827055	7827470	0	2	50,50	0,365
chrII	5886446	5890536	muscle_readCounts:16;intestine_readCounts:110;muscle_PSI:0.275;intestine_PSI:0.682	950	+	5886446	5890536	0	2	50,50	0,4040
chrII	5884613	5890536	muscle_readCounts:36;intestine_readCounts:58;muscle_PSI:0.607;intestine_PSI:0.288	950	+	5884613	5890536	0	2	50,50	0,5873
chrII	5889657	5890536	muscle_readCounts:7;intestine_readCounts:5;muscle_PSI:0.118;intestine_PSI:0.029	950	+	5889657	5890536	0	2	50,50	0,829
chrX	7940226	7940373	muscle_readCounts:1123;intestine_readCounts:1093;muscle_PSI:0.937;intestine_PSI:0.644	950	-	7940226	7940373	0	2	50,50	0,97
chrX	7940126	7940373	muscle_readCounts:76;intestine_readCounts:642;muscle_PSI:0.063;intestine_PSI:0.356	950	-	7940126	7940373	0	2	50,50	0,197
chrX	7940774	7940933	muscle_readCounts:1065;intestine_readCounts:1137;muscle_PSI:0.901;intestine_PSI:0.496	950	-	7940774	7940933	0	2	50,50	0,109
chrX	7940574	7940933	muscle_readCounts:140;intestine_readCounts:1104;muscle_PSI:0.099;intestine_PSI:0.504	950	-	7940574	7940933	0	2	50,50	0,309
chrX	7940574	7940846	muscle_readCounts:1047;intestine_readCounts:1126;muscle_PSI:0.899;intestine_PSI:0.495	950	-	7940574	7940846	0	2	50,50	0,222
chrX	7941640	7941980	muscle_readCounts:803;intestine_readCounts:690;muscle_PSI:0.958;intestine_PSI:0.678	950	-	7941640	7941980	0	2	50,50	0,290
chrX	7941640	7944569	muscle_readCounts:35;intestine_readCounts:448;muscle_PSI:0.042;intestine_PSI:0.322	950	-	7941640	7944569	0	2	50,50	0,2879
chrIV	5985120	5986568	muscle_readCounts:665;intestine_readCounts:795;muscle_PSI:0.025;intestine_PSI:0.287	950	+	5985120	5986568	0	2	50,50	0,1398
chrIV	5984930	5986568	muscle_readCounts:73;intestine_readCounts:207;muscle_PSI:0.003;intestine_PSI:0.066	950	+	5984930	5986568	0	2	50,50	0,1588
chrIV	5986305	5986568	muscle_readCounts:24195;intestine_readCounts:1978;muscle_PSI:0.972;intestine_PSI:0.647	950	+	5986305	5986568	0	2	50,50	0,213
chrI	12567326	12568234	muscle_readCounts:75;intestine_readCounts:971;muscle_PSI:0.473;intestine_PSI:0.918	950	-	12567326	12568234	0	2	50,50	0,858
chrI	12567326	12568255	muscle_readCounts:81;intestine_readCounts:70;muscle_PSI:0.527;intestine_PSI:0.082	950	-	12567326	12568255	0	2	50,50	0,879
chrX	8390572	8390999	muscle_readCounts:39;intestine_readCounts:444;muscle_PSI:0.58;intestine_PSI:0.972	950	-	8390572	8390999	0	2	50,50	0,377
chrX	8389692	8390999	muscle_readCounts:23;intestine_readCounts:16;muscle_PSI:0.42;intestine_PSI:0.028	950	-	8389692	8390999	0	2	50,50	0,1257
chrX	8389692	8390648	muscle_readCounts:51;intestine_readCounts:443;muscle_PSI:0.661;intestine_PSI:0.972	950	-	8389692	8390648	0	2	50,50	0,906
chrI	12975270	12975455	muscle_readCounts:97;intestine_readCounts:423;muscle_PSI:0.907;intestine_PSI:0.587	950	+	12975270	12975455	0	2	50,50	0,135
chrI	12975270	12975449	muscle_readCounts:13;intestine_readCounts:266;muscle_PSI:0.093;intestine_PSI:0.413	950	+	12975270	12975449	0	2	50,50	0,129
chrI	8670170	8670938	muscle_readCounts:115;intestine_readCounts:88;muscle_PSI:0.754;intestine_PSI:0.432	950	-	8670170	8670938	0	2	50,50	0,718
chrI	8670170	8673570	muscle_readCounts:52;intestine_readCounts:117;muscle_PSI:0.246;intestine_PSI:0.568	950	-	8670170	8673570	0	2	50,50	0,3350
chrIII	8724694	8724850	muscle_readCounts:23;intestine_readCounts:909;muscle_PSI:0.064;intestine_PSI:0.474	950	+	8724694	8724850	0	2	50,50	0,106
chrIII	8724694	8725037	muscle_readCounts:352;intestine_readCounts:1052;muscle_PSI:0.936;intestine_PSI:0.526	950	+	8724694	8725037	0	2	50,50	0,293
chrIII	8724797	8725037	muscle_readCounts:13;intestine_readCounts:796;muscle_PSI:0.036;intestine_PSI:0.444	950	+	8724797	8725037	0	2	50,50	0,190
chrIII	8909061	8910130	muscle_readCounts:112;intestine_readCounts:1222;muscle_PSI:0.573;intestine_PSI:0.82	950	+	8909061	8910130	0	2	50,50	0,1019
chrIII	8909061	8909282	muscle_readCounts:89;intestine_readCounts:293;muscle_PSI:0.427;intestine_PSI:0.18	950	+	8909061	8909282	0	2	50,50	0,171
chrII	13387515	13388528	muscle_readCounts:75;intestine_readCounts:41;muscle_PSI:0.838;intestine_PSI:0.557	950	+	13387515	13388528	0	2	50,50	0,963
chrII	13387515	13388517	muscle_readCounts:15;intestine_readCounts:32;muscle_PSI:0.162;intestine_PSI:0.443	950	+	13387515	13388517	0	2	50,50	0,952
chrIV	13390925	13392396	muscle_readCounts:456;intestine_readCounts:4537;muscle_PSI:0.701;intestine_PSI:0.906	950	-	13390925	13392396	0	2	50,50	0,1421
chrIV	13390925	13392390	muscle_readCounts:194;intestine_readCounts:438;muscle_PSI:0.299;intestine_PSI:0.094	950	-	13390925	13392390	0	2	50,50	0,1415
chrII	8967962	8968176	muscle_readCounts:15;intestine_readCounts:87;muscle_PSI:0.196;intestine_PSI:0.707	950	-	8967962	8968176	0	2	50,50	0,164
chrII	8967956	8968176	muscle_readCounts:26;intestine_readCounts:60;muscle_PSI:0.33;intestine_PSI:0.251	950	-	8967956	8968176	0	2	50,50	0,170
chrII	8967956	8968565	muscle_readCounts:37;intestine_readCounts:7;muscle_PSI:0.474;intestine_PSI:0.042	950	-	8967956	8968565	0	2	50,50	0,559
chrI	9019265	9019540	muscle_readCounts:608;intestine_readCounts:85;muscle_PSI:0.948;intestine_PSI:0.24	950	+	9019265	9019540	0	2	50,50	0,225
chrI	9018708	9019540	muscle_readCounts:30;intestine_readCounts:200;muscle_PSI:0.052;intestine_PSI:0.76	950	+	9018708	9019540	0	2	50,50	0,782
chrII	9065355	9067096	muscle_readCounts:22;intestine_readCounts:145;muscle_PSI:0.087;intestine_PSI:0.414	950	-	9065355	9067096	0	2	50,50	0,1691
chrII	9066575	9067096	muscle_readCounts:189;intestine_readCounts:244;muscle_PSI:0.913;intestine_PSI:0.586	950	-	9066575	9067096	0	2	50,50	0,471
chrII	9116677	9116874	muscle_readCounts:13;intestine_readCounts:188;muscle_PSI:0.109;intestine_PSI:0.826	950	+	9116677	9116874	0	2	50,50	0,147
chrII	9113352	9116874	muscle_readCounts:111;intestine_readCounts:39;muscle_PSI:0.891;intestine_PSI:0.174	950	+	9113352	9116874	0	2	50,50	0,3472
chrX	13867246	13867955	muscle_readCounts:521;intestine_readCounts:117;muscle_PSI:0.983;intestine_PSI:0.559	950	-	13867246	13867955	0	2	50,50	0,659
chrX	13867246	13868081	muscle_readCounts:7;intestine_readCounts:87;muscle_PSI:0.017;intestine_PSI:0.441	950	-	13867246	13868081	0	2	50,50	0,785
chrIII	6997846	7007598	muscle_readCounts:2;intestine_readCounts:11;muscle_PSI:0.006;intestine_PSI:0.076	950	+	6997846	7007598	0	2	50,50	0,9702
chrIII	6997846	7001545	muscle_readCounts:311;intestine_readCounts:74;muscle_PSI:0.817;intestine_PSI:0.481	950	+	6997846	7001545	0	2	50,50	0,3649
chrIII	6997846	7001946	muscle_readCounts:80;intestine_readCounts:66;muscle_PSI:0.178;intestine_PSI:0.443	950	+	6997846	7001946	0	2	50,50	0,4050
chrX	9383041	9383515	muscle_readCounts:59;intestine_readCounts:1368;muscle_PSI:0.54;intestine_PSI:0.972	950	+	9383041	9383515	0	2	50,50	0,424
chrX	9383041	9385623	muscle_readCounts:54;intestine_readCounts:41;muscle_PSI:0.46;intestine_PSI:0.028	950	+	9383041	9385623	0	2	50,50	0,2532
chrI	7054228	7054776	muscle_readCounts:30;intestine_readCounts:25;muscle_PSI:0.357;intestine_PSI:0.041	950	-	7054228	7054776	0	2	50,50	0,498
chrI	7054228	7054587	muscle_readCounts:57;intestine_readCounts:1374;muscle_PSI:0.599;intestine_PSI:0.955	950	-	7054228	7054587	0	2	50,50	0,309
chrI	7054228	7141657	muscle_readCounts:4;intestine_readCounts:2;muscle_PSI:0.044;intestine_PSI:0.004	950	-	7054228	7141657	0	2	50,50	0,87379
chrI	9442229	9443086	muscle_readCounts:187;intestine_readCounts:249;muscle_PSI:0.906;intestine_PSI:0.641	950	-	9442229	9443086	0	2	50,50	0,807
chrI	9441468	9443086	muscle_readCounts:20;intestine_readCounts:133;muscle_PSI:0.094;intestine_PSI:0.359	950	-	9441468	9443086	0	2	50,50	0,1568
chrIII	9549407	9550770	muscle_readCounts:20;intestine_readCounts:21;muscle_PSI:0.382;intestine_PSI:0.055	950	+	9549407	9550770	0	2	50,50	0,1313
chrIII	9550185	9550770	muscle_readCounts:36;intestine_readCounts:252;muscle_PSI:0.618;intestine_PSI:0.945	950	+	9550185	9550770	0	2	50,50	0,535
chrV	9553475	9553984	muscle_readCounts:238;intestine_readCounts:119;muscle_PSI:0.689;intestine_PSI:0.177	950	+	9553475	9553984	0	2	50,50	0,459
chrV	9553791	9553984	muscle_readCounts:127;intestine_readCounts:568;muscle_PSI:0.311;intestine_PSI:0.823	950	+	9553791	9553984	0	2	50,50	0,143
chrV	9553946	9554668	muscle_readCounts:267;intestine_readCounts:784;muscle_PSI:0.684;intestine_PSI:0.894	950	+	9553946	9554668	0	2	50,50	0,672
chrV	9553946	9554902	muscle_readCounts:125;intestine_readCounts:87;muscle_PSI:0.316;intestine_PSI:0.106	950	+	9553946	9554902	0	2	50,50	0,906
chrV	9554688	9554902	muscle_readCounts:289;intestine_readCounts:826;muscle_PSI:0.698;intestine_PSI:0.9	950	+	9554688	9554902	0	2	50,50	0,164
chrII	9578416	9579849	muscle_readCounts:10;intestine_readCounts:44;muscle_PSI:0.124;intestine_PSI:0.421	950	+	9578416	9579849	0	2	50,50	0,1383
chrII	9579246	9579849	muscle_readCounts:71;intestine_readCounts:71;muscle_PSI:0.876;intestine_PSI:0.579	950	+	9579246	9579849	0	2	50,50	0,553
chrIII	9855533	9856140	muscle_readCounts:355;intestine_readCounts:1355;muscle_PSI:0.409;intestine_PSI:0.933	950	-	9855533	9856140	0	2	50,50	0,557
chrIII	9855913	9856140	muscle_readCounts:527;intestine_readCounts:134;muscle_PSI:0.591;intestine_PSI:0.067	950	-	9855913	9856140	0	2	50,50	0,177
chrIII	9855533	9855986	muscle_readCounts:548;intestine_readCounts:154;muscle_PSI:0.6;intestine_PSI:0.08	950	-	9855533	9855986	0	2	50,50	0,403
chrIV	9925947	9926334	muscle_readCounts:29;intestine_readCounts:65;muscle_PSI:0.406;intestine_PSI:0.916	950	-	9925947	9926334	0	2	50,50	0,337
chrIV	9925947	9927624	muscle_readCounts:42;intestine_readCounts:7;muscle_PSI:0.594;intestine_PSI:0.084	950	-	9925947	9927624	0	2	50,50	0,1627
chrI	10088445	10089911	muscle_readCounts:289;intestine_readCounts:588;muscle_PSI:0.452;intestine_PSI:0.965	950	-	10088445	10089911	0	2	50,50	0,1416
chrI	10088445	10088649	muscle_readCounts:348;intestine_readCounts:30;muscle_PSI:0.548;intestine_PSI:0.035	950	-	10088445	10088649	0	2	50,50	0,154
chrIV	10165483	10166014	muscle_readCounts:102;intestine_readCounts:44;muscle_PSI:0.525;intestine_PSI:0.116	950	-	10165483	10166014	0	2	50,50	0,481
chrIV	10165802	10166014	muscle_readCounts:151;intestine_readCounts:391;muscle_PSI:0.475;intestine_PSI:0.884	950	-	10165802	10166014	0	2	50,50	0,162
chrX	10244242	10245108	muscle_readCounts:111;intestine_readCounts:59;muscle_PSI:0.919;intestine_PSI:0.487	950	-	10244242	10245108	0	2	50,50	0,816
chrX	10244722	10245108	muscle_readCounts:13;intestine_readCounts:101;muscle_PSI:0.081;intestine_PSI:0.513	950	-	10244722	10245108	0	2	50,50	0,336
chrIV	10327665	10329146	muscle_readCounts:1082;intestine_readCounts:917;muscle_PSI:0.851;intestine_PSI:0.384	950	-	10327665	10329146	0	2	50,50	0,1431
chrIV	10326594	10329146	muscle_readCounts:191;intestine_readCounts:1425;muscle_PSI:0.149;intestine_PSI:0.616	950	-	10326594	10329146	0	2	50,50	0,2502
chrIV	10326594	10327651	muscle_readCounts:1296;intestine_readCounts:1330;muscle_PSI:0.872;intestine_PSI:0.48	950	-	10326594	10327651	0	2	50,50	0,1007
chrIV	10338247	10338535	muscle_readCounts:184;intestine_readCounts:307;muscle_PSI:0.515;intestine_PSI:0.928	950	-	10338247	10338535	0	2	50,50	0,238
chrIV	10338247	10338753	muscle_readCounts:178;intestine_readCounts:34;muscle_PSI:0.485;intestine_PSI:0.072	950	-	10338247	10338753	0	2	50,50	0,456
chrIV	10338508	10338906	muscle_readCounts:134;intestine_readCounts:240;muscle_PSI:0.492;intestine_PSI:0.831	950	-	10338508	10338906	0	2	50,50	0,348
chrIV	10338726	10338906	muscle_readCounts:141;intestine_readCounts:42;muscle_PSI:0.508;intestine_PSI:0.169	950	-	10338726	10338906	0	2	50,50	0,130
chrV	15654437	15655230	muscle_readCounts:97;intestine_readCounts:210;muscle_PSI:0.585;intestine_PSI:0.293	950	-	15654437	15655230	0	2	50,50	0,743
chrV	15654437	15655212	muscle_readCounts:89;intestine_readCounts:446;muscle_PSI:0.415;intestine_PSI:0.707	950	-	15654437	15655212	0	2	50,50	0,725
chrIV	10494002	10494558	muscle_readCounts:430;intestine_readCounts:180;muscle_PSI:0.645;intestine_PSI:0.123	950	-	10494002	10494558	0	2	50,50	0,506
chrIV	10494002	10494880	muscle_readCounts:236;intestine_readCounts:1340;muscle_PSI:0.355;intestine_PSI:0.877	950	-	10494002	10494880	0	2	50,50	0,828
chrIV	10494878	10495231	muscle_readCounts:239;intestine_readCounts:754;muscle_PSI:0.369;intestine_PSI:0.862	950	-	10494878	10495231	0	2	50,50	0,303
chrIV	10494577	10495231	muscle_readCounts:425;intestine_readCounts:125;muscle_PSI:0.631;intestine_PSI:0.138	950	-	10494577	10495231	0	2	50,50	0,604
chrI	10751138	10763639	muscle_readCounts:6;intestine_readCounts:89;muscle_PSI:0.114;intestine_PSI:0.546	950	+	10751138	10763639	0	2	50,50	0,12451
chrI	10763297	10763639	muscle_readCounts:48;intestine_readCounts:110;muscle_PSI:0.886;intestine_PSI:0.454	950	+	10763297	10763639	0	2	50,50	0,292
chrX	8229869	8230624	muscle_readCounts:7;intestine_readCounts:13;muscle_PSI:0.046;intestine_PSI:0.057	950	-	8229869	8230624	0	2	50,50	0,705
chrX	8230127	8230624	muscle_readCounts:105;intestine_readCounts:81;muscle_PSI:0.696;intestine_PSI:0.444	950	-	8230127	8230624	0	2	50,50	0,447
chrX	8229529	8230624	muscle_readCounts:39;intestine_readCounts:84;muscle_PSI:0.258;intestine_PSI:0.499	950	-	8229529	8230624	0	2	50,50	0,1045
chrV	11377167	11377385	muscle_readCounts:2578;intestine_readCounts:4862;muscle_PSI:0.423;intestine_PSI:0.91	950	+	11377167	11377385	0	2	50,50	0,168
chrV	11377167	11377891	muscle_readCounts:3639;intestine_readCounts:288;muscle_PSI:0.577;intestine_PSI:0.09	950	+	11377167	11377891	0	2	50,50	0,674
chrX	11394946	11395316	muscle_readCounts:21;intestine_readCounts:365;muscle_PSI:0.333;intestine_PSI:0.726	950	-	11394946	11395316	0	2	50,50	0,320
chrX	11395170	11395316	muscle_readCounts:51;intestine_readCounts:138;muscle_PSI:0.667;intestine_PSI:0.274	950	-	11395170	11395316	0	2	50,50	0,96
chrX	11394946	11395234	muscle_readCounts:56;intestine_readCounts:171;muscle_PSI:0.684;intestine_PSI:0.319	950	-	11394946	11395234	0	2	50,50	0,238
chrX	17679269	17679971	muscle_readCounts:58;intestine_readCounts:579;muscle_PSI:0.034;intestine_PSI:0.459	950	+	17679269	17679971	0	2	50,50	0,652
chrX	17679619	17679971	muscle_readCounts:3014;intestine_readCounts:840;muscle_PSI:0.966;intestine_PSI:0.541	950	+	17679619	17679971	0	2	50,50	0,302
chrV	11849441	11849838	muscle_readCounts:111;intestine_readCounts:38;muscle_PSI:0.571;intestine_PSI:0.035	950	+	11849441	11849838	0	2	50,50	0,347
chrV	11849441	11850830	muscle_readCounts:156;intestine_readCounts:686;muscle_PSI:0.429;intestine_PSI:0.965	950	+	11849441	11850830	0	2	50,50	0,1339
chrV	11849832	11850830	muscle_readCounts:158;intestine_readCounts:45;muscle_PSI:0.635;intestine_PSI:0.057	950	+	11849832	11850830	0	2	50,50	0,948
chrIII	11934130	11941214	muscle_readCounts:796;intestine_readCounts:6042;muscle_PSI:0.343;intestine_PSI:0.942	950	-	11934130	11941214	0	2	50,50	0,7034
chrIII	11939131	11941214	muscle_readCounts:1168;intestine_readCounts:264;muscle_PSI:0.657;intestine_PSI:0.058	950	-	11939131	11941214	0	2	50,50	0,2033
chrX	11998041	11998549	muscle_readCounts:70;intestine_readCounts:200;muscle_PSI:0.618;intestine_PSI:0.194	950	-	11998041	11998549	0	2	50,50	0,458
chrX	11998357	11998549	muscle_readCounts:54;intestine_readCounts:865;muscle_PSI:0.382;intestine_PSI:0.806	950	-	11998357	11998549	0	2	50,50	0,142
chrX	11998041	11998360	muscle_readCounts:53;intestine_readCounts:1503;muscle_PSI:0.387;intestine_PSI:0.861	950	-	11998041	11998360	0	2	50,50	0,269
chrIII	12052664	12053635	muscle_readCounts:882;intestine_readCounts:5669;muscle_PSI:0.226;intestine_PSI:0.952	950	-	12052664	12053635	0	2	50,50	0,921
chrIII	12053456	12053635	muscle_readCounts:2254;intestine_readCounts:193;muscle_PSI:0.774;intestine_PSI:0.048	950	-	12053456	12053635	0	2	50,50	0,129
chrIII	12052664	12053535	muscle_readCounts:2225;intestine_readCounts:193;muscle_PSI:0.768;intestine_PSI:0.048	950	-	12052664	12053535	0	2	50,50	0,821
chrII	9064224	9065695	muscle_readCounts:450;intestine_readCounts:215;muscle_PSI:0.882;intestine_PSI:0.212	950	-	9064224	9065695	0	2	50,50	0,1421
chrII	9064224	9066105	muscle_readCounts:15;intestine_readCounts:118;muscle_PSI:0.022;intestine_PSI:0.131	950	-	9064224	9066105	0	2	50,50	0,1831
chrII	9064224	9065233	muscle_readCounts:53;intestine_readCounts:624;muscle_PSI:0.096;intestine_PSI:0.656	950	-	9064224	9065233	0	2	50,50	0,959
chrIV	9119911	9127244	muscle_readCounts:30;intestine_readCounts:548;muscle_PSI:0.34;intestine_PSI:0.77	950	+	9119911	9127244	0	2	50,50	0,7283
chrIV	9120216	9127244	muscle_readCounts:18;intestine_readCounts:136;muscle_PSI:0.192;intestine_PSI:0.123	950	+	9120216	9127244	0	2	50,50	0,6978
chrIV	9122210	9127244	muscle_readCounts:41;intestine_readCounts:85;muscle_PSI:0.468;intestine_PSI:0.107	950	+	9122210	9127244	0	2	50,50	0,4984
chrIII	12544791	12547387	muscle_readCounts:80;intestine_readCounts:40;muscle_PSI:0.862;intestine_PSI:0.446	950	-	12544791	12547387	0	2	50,50	0,2546
chrIII	12544791	12547284	muscle_readCounts:9;intestine_readCounts:37;muscle_PSI:0.138;intestine_PSI:0.554	950	-	12544791	12547284	0	2	50,50	0,2443
chrII	12808570	12809735	muscle_readCounts:165;intestine_readCounts:3554;muscle_PSI:0.272;intestine_PSI:0.968	950	+	12808570	12809735	0	2	50,50	0,1115
chrII	12808570	12809325	muscle_readCounts:472;intestine_readCounts:70;muscle_PSI:0.728;intestine_PSI:0.032	950	+	12808570	12809325	0	2	50,50	0,705
chrI	13035596	13043025	muscle_readCounts:364;intestine_readCounts:261;muscle_PSI:0.263;intestine_PSI:0.574	950	+	13035596	13043025	0	2	50,50	0,7379
chrI	13036864	13043025	muscle_readCounts:875;intestine_readCounts:193;muscle_PSI:0.737;intestine_PSI:0.426	950	+	13036864	13043025	0	2	50,50	0,6111
chrIII	13260589	13260788	muscle_readCounts:114;intestine_readCounts:425;muscle_PSI:0.538;intestine_PSI:0.237	950	+	13260589	13260788	0	2	50,50	0,149
chrIII	13257537	13260788	muscle_readCounts:97;intestine_readCounts:1623;muscle_PSI:0.462;intestine_PSI:0.763	950	+	13257537	13260788	0	2	50,50	0,3201
chrX	13543126	13543282	muscle_readCounts:515;intestine_readCounts:118;muscle_PSI:0.59;intestine_PSI:0.038	950	+	13543126	13543282	0	2	50,50	0,106
chrX	13542579	13543282	muscle_readCounts:276;intestine_readCounts:2821;muscle_PSI:0.41;intestine_PSI:0.962	950	+	13542579	13543282	0	2	50,50	0,653
chrII	13858748	13862769	muscle_readCounts:62;intestine_readCounts:233;muscle_PSI:0.926;intestine_PSI:0.59	950	-	13858748	13862769	0	2	50,50	0,3971
chrII	13858748	13860717	muscle_readCounts:5;intestine_readCounts:169;muscle_PSI:0.074;intestine_PSI:0.41	950	-	13858748	13860717	0	2	50,50	0,1919
chrV	14120968	14122257	muscle_readCounts:70;intestine_readCounts:62;muscle_PSI:0.812;intestine_PSI:0.263	950	-	14120968	14122257	0	2	50,50	0,1239
chrV	14121462	14122257	muscle_readCounts:18;intestine_readCounts:91;muscle_PSI:0.188;intestine_PSI:0.737	950	-	14121462	14122257	0	2	50,50	0,745
chrV	14120968	14121394	muscle_readCounts:5;intestine_readCounts:13;muscle_PSI:0.045;intestine_PSI:0.077	950	-	14120968	14121394	0	2	50,50	0,376
chrV	14120968	14121418	muscle_readCounts:28;intestine_readCounts:116;muscle_PSI:0.289;intestine_PSI:0.705	950	-	14120968	14121418	0	2	50,50	0,400
chrI	14569890	14570102	muscle_readCounts:198;intestine_readCounts:364;muscle_PSI:0.747;intestine_PSI:0.258	950	-	14569890	14570102	0	2	50,50	0,162
chrI	14567447	14570102	muscle_readCounts:76;intestine_readCounts:975;muscle_PSI:0.253;intestine_PSI:0.742	950	-	14567447	14570102	0	2	50,50	0,2605
chrI	14567447	14569966	muscle_readCounts:176;intestine_readCounts:366;muscle_PSI:0.725;intestine_PSI:0.259	950	-	14567447	14569966	0	2	50,50	0,2469
chrIV	14797023	14797434	muscle_readCounts:20296;intestine_readCounts:2271;muscle_PSI:0.781;intestine_PSI:0.196	950	-	14797023	14797434	0	2	50,50	0,361
chrIV	14797132	14797434	muscle_readCounts:5719;intestine_readCounts:11338;muscle_PSI:0.219;intestine_PSI:0.804	950	-	14797132	14797434	0	2	50,50	0,252
chrIV	14797023	14797183	muscle_readCounts:5342;intestine_readCounts:12269;muscle_PSI:0.207;intestine_PSI:0.818	950	-	14797023	14797183	0	2	50,50	0,110
chrI	14880081	14880659	muscle_readCounts:89;intestine_readCounts:227;muscle_PSI:0.818;intestine_PSI:0.582	950	-	14880081	14880659	0	2	50,50	0,528
chrI	14878943	14880659	muscle_readCounts:20;intestine_readCounts:166;muscle_PSI:0.182;intestine_PSI:0.418	950	-	14878943	14880659	0	2	50,50	0,1666
chrI	14881124	14894625	muscle_readCounts:128;intestine_readCounts:586;muscle_PSI:0.281;intestine_PSI:0.594	950	-	14881124	14894625	0	2	50,50	0,13451
chrI	14881124	14882104	muscle_readCounts:321;intestine_readCounts:410;muscle_PSI:0.719;intestine_PSI:0.406	950	-	14881124	14882104	0	2	50,50	0,930
chrV	14918870	14919785	muscle_readCounts:5;intestine_readCounts:313;muscle_PSI:0.015;intestine_PSI:0.639	950	-	14918870	14919785	0	2	50,50	0,865
chrV	14918870	14919347	muscle_readCounts:302;intestine_readCounts:193;muscle_PSI:0.985;intestine_PSI:0.361	950	-	14918870	14919347	0	2	50,50	0,427
chrI	14950361	14951491	muscle_readCounts:2753;intestine_readCounts:1560;muscle_PSI:0.968;intestine_PSI:0.578	950	+	14950361	14951491	0	2	50,50	0,1080
chrI	14950361	14950945	muscle_readCounts:97;intestine_readCounts:995;muscle_PSI:0.032;intestine_PSI:0.422	950	+	14950361	14950945	0	2	50,50	0,534
chrI	14951107	14951491	muscle_readCounts:84;intestine_readCounts:890;muscle_PSI:0.024;intestine_PSI:0.397	950	+	14951107	14951491	0	2	50,50	0,334
chrX	15269676	15270709	muscle_readCounts:41;intestine_readCounts:282;muscle_PSI:0.21;intestine_PSI:0.47	950	-	15269676	15270709	0	2	50,50	0,983
chrX	15269676	15271276	muscle_readCounts:138;intestine_readCounts:338;muscle_PSI:0.79;intestine_PSI:0.53	950	-	15269676	15271276	0	2	50,50	0,1550
chrIII	11934130	11939021	muscle_readCounts:284;intestine_readCounts:71;muscle_PSI:0.129;intestine_PSI:0.015	950	-	11934130	11939021	0	2	50,50	0,4841
chrIII	11934130	11936963	muscle_readCounts:885;intestine_readCounts:317;muscle_PSI:0.486;intestine_PSI:0.064	950	-	11934130	11936963	0	2	50,50	0,2783
chrX	9554773	9556677	muscle_readCounts:10;intestine_readCounts:5;muscle_PSI:0.075;intestine_PSI:0.035	950	+	9554773	9556677	0	2	50,50	0,1854
chrX	9555275	9556677	muscle_readCounts:44;intestine_readCounts:24;muscle_PSI:0.388;intestine_PSI:0.114	950	+	9555275	9556677	0	2	50,50	0,1352
chrX	9555623	9556677	muscle_readCounts:7;intestine_readCounts:53;muscle_PSI:0.059;intestine_PSI:0.377	950	+	9555623	9556677	0	2	50,50	0,1004
chrX	9556303	9556677	muscle_readCounts:52;intestine_readCounts:66;muscle_PSI:0.478;intestine_PSI:0.474	950	+	9556303	9556677	0	2	50,50	0,324
chrX	16809548	16809748	muscle_readCounts:607;intestine_readCounts:76;muscle_PSI:0.58;intestine_PSI:0.287	950	-	16809548	16809748	0	2	50,50	0,150
chrX	16809548	16813585	muscle_readCounts:516;intestine_readCounts:195;muscle_PSI:0.42;intestine_PSI:0.713	950	-	16809548	16813585	0	2	50,50	0,3987
chrII	12810552	12810710	muscle_readCounts:342;intestine_readCounts:249;muscle_PSI:0.341;intestine_PSI:0.048	950	+	12810552	12810710	0	2	50,50	0,108
chrII	12809781	12810710	muscle_readCounts:228;intestine_readCounts:4603;muscle_PSI:0.186;intestine_PSI:0.922	950	+	12809781	12810710	0	2	50,50	0,879
chrII	12809371	12810710	muscle_readCounts:579;intestine_readCounts:54;muscle_PSI:0.473;intestine_PSI:0.03	950	+	12809371	12810710	0	2	50,50	0,1289
chrV	18202393	18203397	muscle_readCounts:30;intestine_readCounts:12;muscle_PSI:0.281;intestine_PSI:0.178	950	+	18202393	18203397	0	2	50,50	0,954
chrV	18202393	18205421	muscle_readCounts:22;intestine_readCounts:48;muscle_PSI:0.212;intestine_PSI:0.71	950	+	18202393	18205421	0	2	50,50	0,2978
chrV	18202393	18203374	muscle_readCounts:54;intestine_readCounts:6;muscle_PSI:0.507;intestine_PSI:0.112	950	+	18202393	18203374	0	2	50,50	0,931
chrI	14933923	14940950	muscle_readCounts:116;intestine_readCounts:303;muscle_PSI:0.234;intestine_PSI:0.821	950	+	14933923	14940950	0	2	50,50	0,6977
chrI	14919620	14940950	muscle_readCounts:311;intestine_readCounts:86;muscle_PSI:0.599;intestine_PSI:0.145	950	+	14919620	14940950	0	2	50,50	0,21280
chrI	14937096	14940950	muscle_readCounts:92;intestine_readCounts:19;muscle_PSI:0.168;intestine_PSI:0.034	950	+	14937096	14940950	0	2	50,50	0,3804
chrV	20783172	20783787	muscle_readCounts:968;intestine_readCounts:1123;muscle_PSI:0.942;intestine_PSI:0.659	950	+	20783172	20783787	0	2	50,50	0,565
chrV	20783478	20783787	muscle_readCounts:69;intestine_readCounts:620;muscle_PSI:0.058;intestine_PSI:0.341	950	+	20783478	20783787	0	2	50,50	0,259
chrIII	13765976	13766149	muscle_readCounts:53;intestine_readCounts:125;muscle_PSI:0.066;intestine_PSI:0.183	950	-	13765976	13766149	0	2	50,50	0,123
chrIII	13765976	13766945	muscle_readCounts:27;intestine_readCounts:183;muscle_PSI:0.036;intestine_PSI:0.239	950	-	13765976	13766945	0	2	50,50	0,919
chrIII	13765976	13768074	muscle_readCounts:671;intestine_readCounts:507;muscle_PSI:0.879;intestine_PSI:0.436	950	-	13765976	13768074	0	2	50,50	0,2048
chrIII	13765976	13767785	muscle_readCounts:13;intestine_readCounts:79;muscle_PSI:0.019;intestine_PSI:0.142	950	-	13765976	13767785	0	2	50,50	0,1759
chrX	17677194	17678979	muscle_readCounts:442;intestine_readCounts:105;muscle_PSI:0.19;intestine_PSI:0.107	950	+	17677194	17678979	0	2	50,50	0,1735
chrX	17678704	17678979	muscle_readCounts:25;intestine_readCounts:62;muscle_PSI:0.013;intestine_PSI:0.1	950	+	17678704	17678979	0	2	50,50	0,225
chrX	17678722	17678979	muscle_readCounts:1465;intestine_readCounts:233;muscle_PSI:0.762;intestine_PSI:0.231	950	+	17678722	17678979	0	2	50,50	0,207
chrX	17677939	17678979	muscle_readCounts:60;intestine_readCounts:428;muscle_PSI:0.035;intestine_PSI:0.562	950	+	17677939	17678979	0	2	50,50	0,990
chrX	17678722	17679971	muscle_readCounts:7215;intestine_readCounts:851;muscle_PSI:0.672;intestine_PSI:0.359	950	+	17678722	17679971	0	2	50,50	0,1199
chrX	17677194	17679971	muscle_readCounts:1019;intestine_readCounts:130;muscle_PSI:0.07;intestine_PSI:0.053	950	+	17677194	17679971	0	2	50,50	0,2727
chrV	14830267	14831468	muscle_readCounts:51;intestine_readCounts:450;muscle_PSI:0.073;intestine_PSI:0.141	950	-	14830267	14831468	0	2	50,50	0,1151
chrV	14830267	14830810	muscle_readCounts:80;intestine_readCounts:1839;muscle_PSI:0.161;intestine_PSI:0.642	950	-	14830267	14830810	0	2	50,50	0,493
chrV	14830267	14830576	muscle_readCounts:95;intestine_readCounts:99;muscle_PSI:0.18;intestine_PSI:0.029	950	-	14830267	14830576	0	2	50,50	0,259
chrV	14830267	14833684	muscle_readCounts:355;intestine_readCounts:856;muscle_PSI:0.586;intestine_PSI:0.187	950	-	14830267	14833684	0	2	50,50	0,3367

## Sheet: neuron_vs_dopaminergic
track name=neuron_vs_dopaminergic description='neuron_vs_dopaminergic_tissue_differential'
chrV	23244	23842	neuron_readCounts:75;dopaminergic_readCounts:27;neuron_PSI:0.784;dopaminergic_PSI:0.261	950	+	23244	23842	0	2	50,50	0,548
chrV	23595	23842	neuron_readCounts:23;dopaminergic_readCounts:52;neuron_PSI:0.216;dopaminergic_PSI:0.739	950	+	23595	23842	0	2	50,50	0,197
chrV	28649	29385	neuron_readCounts:128;dopaminergic_readCounts:28;neuron_PSI:0.566;dopaminergic_PSI:0.285	950	+	28649	29385	0	2	50,50	0,686
chrV	26330	28431	neuron_readCounts:179;dopaminergic_readCounts:22;neuron_PSI:0.558;dopaminergic_PSI:0.127	950	+	26330	28431	0	2	50,50	0,2051
chrV	26330	30249	neuron_readCounts:45;dopaminergic_readCounts:114;neuron_PSI:0.139;dopaminergic_PSI:0.506	950	+	26330	30249	0	2	50,50	0,3869
chrV	26330	29385	neuron_readCounts:98;dopaminergic_readCounts:73;neuron_PSI:0.303;dopaminergic_PSI:0.367	950	+	26330	29385	0	2	50,50	0,3005
chrV	28649	30249	neuron_readCounts:53;dopaminergic_readCounts:12;neuron_PSI:0.218;dopaminergic_PSI:0.085	950	+	28649	30249	0	2	50,50	0,1550
chrV	29465	30249	neuron_readCounts:136;dopaminergic_readCounts:40;neuron_PSI:0.584;dopaminergic_PSI:0.278	950	+	29465	30249	0	2	50,50	0,734
chrV	38219	39040	neuron_readCounts:445;dopaminergic_readCounts:335;neuron_PSI:0.223;dopaminergic_PSI:0.483	950	+	38219	39040	0	2	50,50	0,771
chrV	38219	40503	neuron_readCounts:1554;dopaminergic_readCounts:365;neuron_PSI:0.777;dopaminergic_PSI:0.517	950	+	38219	40503	0	2	50,50	0,2234
chrV	38976	40503	neuron_readCounts:492;dopaminergic_readCounts:337;neuron_PSI:0.241;dopaminergic_PSI:0.481	950	+	38976	40503	0	2	50,50	0,1477
chrII	72562	74339	neuron_readCounts:264;dopaminergic_readCounts:624;neuron_PSI:0.466;dopaminergic_PSI:0.954	950	-	72562	74339	0	2	50,50	0,1727
chrII	72562	72761	neuron_readCounts:521;dopaminergic_readCounts:4;neuron_PSI:0.534;dopaminergic_PSI:0.046	950	-	72562	72761	0	2	50,50	0,149
chrI	100288	100444	neuron_readCounts:49;dopaminergic_readCounts:211;neuron_PSI:0.282;dopaminergic_PSI:0.611	950	-	100288	100444	0	2	50,50	0,106
chrI	100273	100444	neuron_readCounts:141;dopaminergic_readCounts:186;neuron_PSI:0.718;dopaminergic_PSI:0.389	950	-	100273	100444	0	2	50,50	0,121
chrV	307529	308622	neuron_readCounts:180;dopaminergic_readCounts:193;neuron_PSI:0.309;dopaminergic_PSI:0.783	950	-	307529	308622	0	2	50,50	0,1043
chrV	306405	308622	neuron_readCounts:330;dopaminergic_readCounts:93;neuron_PSI:0.691;dopaminergic_PSI:0.217	950	-	306405	308622	0	2	50,50	0,2167
chrIII	347387	348094	neuron_readCounts:765;dopaminergic_readCounts:26;neuron_PSI:0.833;dopaminergic_PSI:0.042	950	-	347387	348094	0	2	50,50	0,657
chrIII	347859	348094	neuron_readCounts:144;dopaminergic_readCounts:553;neuron_PSI:0.167;dopaminergic_PSI:0.958	950	-	347859	348094	0	2	50,50	0,185
chrIII	347387	347890	neuron_readCounts:145;dopaminergic_readCounts:404;neuron_PSI:0.16;dopaminergic_PSI:0.946	950	-	347387	347890	0	2	50,50	0,453
chrIII	409946	410597	neuron_readCounts:70;dopaminergic_readCounts:164;neuron_PSI:0.229;dopaminergic_PSI:0.469	950	-	409946	410597	0	2	50,50	0,601
chrIII	410356	410597	neuron_readCounts:272;dopaminergic_readCounts:145;neuron_PSI:0.771;dopaminergic_PSI:0.531	950	-	410356	410597	0	2	50,50	0,191
chrIV	885371	886491	neuron_readCounts:119;dopaminergic_readCounts:38;neuron_PSI:0.536;dopaminergic_PSI:0.235	950	+	885371	886491	0	2	50,50	0,1070
chrIV	885371	886545	neuron_readCounts:90;dopaminergic_readCounts:116;neuron_PSI:0.464;dopaminergic_PSI:0.765	950	+	885371	886545	0	2	50,50	0,1124
chrIII	594073	596695	neuron_readCounts:190;dopaminergic_readCounts:6;neuron_PSI:0.833;dopaminergic_PSI:0.116	950	-	594073	596695	0	2	50,50	0,2572
chrIII	595843	596695	neuron_readCounts:38;dopaminergic_readCounts:199;neuron_PSI:0.167;dopaminergic_PSI:0.884	950	-	595843	596695	0	2	50,50	0,802
chrIII	594073	595298	neuron_readCounts:162;dopaminergic_readCounts:305;neuron_PSI:0.461;dopaminergic_PSI:0.931	950	-	594073	595298	0	2	50,50	0,1175
chrX	1060635	1062439	neuron_readCounts:1153;dopaminergic_readCounts:111;neuron_PSI:0.554;dopaminergic_PSI:0.843	950	-	1060635	1062439	0	2	50,50	0,1754
chrX	1060635	1062427	neuron_readCounts:978;dopaminergic_readCounts:20;neuron_PSI:0.446;dopaminergic_PSI:0.157	950	-	1060635	1062427	0	2	50,50	0,1742
chrX	579337	580938	neuron_readCounts:33;dopaminergic_readCounts:9;neuron_PSI:0.087;dopaminergic_PSI:0.044	950	-	579337	580938	0	2	50,50	0,1551
chrX	579337	580037	neuron_readCounts:57;dopaminergic_readCounts:124;neuron_PSI:0.182;dopaminergic_PSI:0.583	950	-	579337	580037	0	2	50,50	0,650
chrX	579337	580347	neuron_readCounts:296;dopaminergic_readCounts:113;neuron_PSI:0.731;dopaminergic_PSI:0.373	950	-	579337	580347	0	2	50,50	0,960
chrX	580093	581679	neuron_readCounts:45;dopaminergic_readCounts:125;neuron_PSI:0.208;dopaminergic_PSI:0.741	950	-	580093	581679	0	2	50,50	0,1536
chrX	580994	581679	neuron_readCounts:23;dopaminergic_readCounts:5;neuron_PSI:0.095;dopaminergic_PSI:0.09	950	-	580994	581679	0	2	50,50	0,635
chrX	580403	581679	neuron_readCounts:177;dopaminergic_readCounts:46;neuron_PSI:0.697;dopaminergic_PSI:0.169	950	-	580403	581679	0	2	50,50	0,1226
chrIII	933747	933888	neuron_readCounts:83;dopaminergic_readCounts:168;neuron_PSI:0.298;dopaminergic_PSI:0.591	950	-	933747	933888	0	2	50,50	0,91
chrIII	933747	936004	neuron_readCounts:214;dopaminergic_readCounts:115;neuron_PSI:0.702;dopaminergic_PSI:0.409	950	-	933747	936004	0	2	50,50	0,2207
chrI	990092	991545	neuron_readCounts:9;dopaminergic_readCounts:21;neuron_PSI:0.031;dopaminergic_PSI:0.291	950	+	990092	991545	0	2	50,50	0,1403
chrI	990092	990570	neuron_readCounts:293;dopaminergic_readCounts:54;neuron_PSI:0.969;dopaminergic_PSI:0.709	950	+	990092	990570	0	2	50,50	0,428
chrI	1491439	1492435	neuron_readCounts:139;dopaminergic_readCounts:251;neuron_PSI:0.228;dopaminergic_PSI:0.493	950	-	1491439	1492435	0	2	50,50	0,946
chrI	1491430	1492435	neuron_readCounts:432;dopaminergic_readCounts:231;neuron_PSI:0.772;dopaminergic_PSI:0.507	950	-	1491430	1492435	0	2	50,50	0,955
chrX	1500808	1501823	neuron_readCounts:10256;dopaminergic_readCounts:2817;neuron_PSI:0.779;dopaminergic_PSI:0.993	950	-	1500808	1501823	0	2	50,50	0,965
chrX	1500808	1501639	neuron_readCounts:2967;dopaminergic_readCounts:16;neuron_PSI:0.221;dopaminergic_PSI:0.007	950	-	1500808	1501639	0	2	50,50	0,781
chrI	1051975	1052618	neuron_readCounts:2044;dopaminergic_readCounts:128;neuron_PSI:0.944;dopaminergic_PSI:0.376	950	-	1051975	1052618	0	2	50,50	0,593
chrI	1051975	1052141	neuron_readCounts:76;dopaminergic_readCounts:202;neuron_PSI:0.056;dopaminergic_PSI:0.624	950	-	1051975	1052141	0	2	50,50	0,116
chrIII	1704870	1705453	neuron_readCounts:128;dopaminergic_readCounts:86;neuron_PSI:0.698;dopaminergic_PSI:0.974	950	-	1704870	1705453	0	2	50,50	0,533
chrIII	1704490	1705453	neuron_readCounts:59;dopaminergic_readCounts:2;neuron_PSI:0.302;dopaminergic_PSI:0.026	950	-	1704490	1705453	0	2	50,50	0,913
chrI	1710946	1712765	neuron_readCounts:1471;dopaminergic_readCounts:400;neuron_PSI:0.898;dopaminergic_PSI:0.419	950	+	1710946	1712765	0	2	50,50	0,1769
chrI	1710946	1712759	neuron_readCounts:193;dopaminergic_readCounts:463;neuron_PSI:0.102;dopaminergic_PSI:0.581	950	+	1710946	1712759	0	2	50,50	0,1763
chrV	1226830	1227007	neuron_readCounts:56;dopaminergic_readCounts:2;neuron_PSI:0.06;dopaminergic_PSI:0.008	950	-	1226830	1227007	0	2	50,50	0,127
chrV	1226833	1227007	neuron_readCounts:637;dopaminergic_readCounts:11;neuron_PSI:0.651;dopaminergic_PSI:0.073	950	-	1226833	1227007	0	2	50,50	0,124
chrV	1226057	1227007	neuron_readCounts:280;dopaminergic_readCounts:870;neuron_PSI:0.288;dopaminergic_PSI:0.919	950	-	1226057	1227007	0	2	50,50	0,900
chrV	1226057	1226891	neuron_readCounts:859;dopaminergic_readCounts:12;neuron_PSI:0.752;dopaminergic_PSI:0.08	950	-	1226057	1226891	0	2	50,50	0,784
chrII	1923496	1923645	neuron_readCounts:164;dopaminergic_readCounts:175;neuron_PSI:0.881;dopaminergic_PSI:0.593	950	+	1923496	1923645	0	2	50,50	0,99
chrII	1923496	1923636	neuron_readCounts:13;dopaminergic_readCounts:98;neuron_PSI:0.119;dopaminergic_PSI:0.407	950	+	1923496	1923636	0	2	50,50	0,90
chrIII	1385182	1385329	neuron_readCounts:8;dopaminergic_readCounts:53;neuron_PSI:0.038;dopaminergic_PSI:0.151	950	+	1385182	1385329	0	2	50,50	0,97
chrIII	1385182	1387504	neuron_readCounts:107;dopaminergic_readCounts:63;neuron_PSI:0.528;dopaminergic_PSI:0.178	950	+	1385182	1387504	0	2	50,50	0,2272
chrIII	1385178	1387504	neuron_readCounts:86;dopaminergic_readCounts:236;neuron_PSI:0.434;dopaminergic_PSI:0.672	950	+	1385178	1387504	0	2	50,50	0,2276
chrIII	1385291	1387504	neuron_readCounts:11;dopaminergic_readCounts:28;neuron_PSI:0.051;dopaminergic_PSI:0.078	950	+	1385291	1387504	0	2	50,50	0,2163
chrIII	2376373	2376555	neuron_readCounts:49;dopaminergic_readCounts:118;neuron_PSI:0.188;dopaminergic_PSI:0.504	950	+	2376373	2376555	0	2	50,50	0,132
chrIII	2376373	2376564	neuron_readCounts:238;dopaminergic_readCounts:115;neuron_PSI:0.812;dopaminergic_PSI:0.496	950	+	2376373	2376564	0	2	50,50	0,141
chrV	1589411	1591714	neuron_readCounts:5;dopaminergic_readCounts:3;neuron_PSI:0.051;dopaminergic_PSI:0.014	950	+	1589411	1591714	0	2	50,50	0,2253
chrV	1589939	1591525	neuron_readCounts:2;dopaminergic_readCounts:24;neuron_PSI:0.032;dopaminergic_PSI:0.111	950	+	1589939	1591525	0	2	50,50	0,1536
chrV	1589411	1591525	neuron_readCounts:33;dopaminergic_readCounts:113;neuron_PSI:0.325;dopaminergic_PSI:0.529	950	+	1589411	1591525	0	2	50,50	0,2064
chrV	1589411	1591448	neuron_readCounts:57;dopaminergic_readCounts:75;neuron_PSI:0.592;dopaminergic_PSI:0.346	950	+	1589411	1591448	0	2	50,50	0,1987
chrX	2477392	2478503	neuron_readCounts:463;dopaminergic_readCounts:23;neuron_PSI:0.682;dopaminergic_PSI:0.345	950	-	2477392	2478503	0	2	50,50	0,1061
chrX	2477326	2478503	neuron_readCounts:257;dopaminergic_readCounts:40;neuron_PSI:0.318;dopaminergic_PSI:0.655	950	-	2477326	2478503	0	2	50,50	0,1127
chrX	2509811	2510026	neuron_readCounts:29;dopaminergic_readCounts:73;neuron_PSI:0.032;dopaminergic_PSI:0.194	950	-	2509811	2510026	0	2	50,50	0,165
chrX	2509820	2509976	neuron_readCounts:1459;dopaminergic_readCounts:130;neuron_PSI:0.881;dopaminergic_PSI:0.397	950	-	2509820	2509976	0	2	50,50	0,106
chrX	2509811	2509976	neuron_readCounts:123;dopaminergic_readCounts:152;neuron_PSI:0.086;dopaminergic_PSI:0.409	950	-	2509811	2509976	0	2	50,50	0,115
chrIV	2680309	2683058	neuron_readCounts:52;dopaminergic_readCounts:79;neuron_PSI:0.583;dopaminergic_PSI:0.889	950	-	2680309	2683058	0	2	50,50	0,2699
chrIV	2680397	2683058	neuron_readCounts:38;dopaminergic_readCounts:11;neuron_PSI:0.417;dopaminergic_PSI:0.111	950	-	2680397	2683058	0	2	50,50	0,2611
chrI	1899376	1902559	neuron_readCounts:18;dopaminergic_readCounts:47;neuron_PSI:0.284;dopaminergic_PSI:0.53	950	+	1899376	1902559	0	2	50,50	0,3133
chrI	1899376	1900067	neuron_readCounts:51;dopaminergic_readCounts:30;neuron_PSI:0.687;dopaminergic_PSI:0.367	950	+	1899376	1900067	0	2	50,50	0,641
chrI	1899809	1900067	neuron_readCounts:2;dopaminergic_readCounts:7;neuron_PSI:0.029;dopaminergic_PSI:0.103	950	+	1899809	1900067	0	2	50,50	0,208
chrI	2872703	2873164	neuron_readCounts:722;dopaminergic_readCounts:320;neuron_PSI:0.874;dopaminergic_PSI:0.596	950	-	2872703	2873164	0	2	50,50	0,411
chrI	2872712	2873164	neuron_readCounts:101;dopaminergic_readCounts:231;neuron_PSI:0.126;dopaminergic_PSI:0.404	950	-	2872712	2873164	0	2	50,50	0,402
chrIV	2875333	2879311	neuron_readCounts:1291;dopaminergic_readCounts:1287;neuron_PSI:0.781;dopaminergic_PSI:0.991	950	-	2875333	2879311	0	2	50,50	0,3928
chrIV	2875291	2879311	neuron_readCounts:364;dopaminergic_readCounts:3;neuron_PSI:0.219;dopaminergic_PSI:0.009	950	-	2875291	2879311	0	2	50,50	0,3970
chrIII	1932324	1933247	neuron_readCounts:323;dopaminergic_readCounts:44;neuron_PSI:0.758;dopaminergic_PSI:0.131	950	+	1932324	1933247	0	2	50,50	0,873
chrIII	1932324	1934233	neuron_readCounts:103;dopaminergic_readCounts:250;neuron_PSI:0.242;dopaminergic_PSI:0.869	950	+	1932324	1934233	0	2	50,50	0,1859
chrIII	1933252	1934233	neuron_readCounts:454;dopaminergic_readCounts:53;neuron_PSI:0.816;dopaminergic_PSI:0.169	950	+	1933252	1934233	0	2	50,50	0,931
chrIV	2910149	2910294	neuron_readCounts:69;dopaminergic_readCounts:2;neuron_PSI:0.265;dopaminergic_PSI:0.021	950	-	2910149	2910294	0	2	50,50	0,95
chrIV	2910149	2910303	neuron_readCounts:165;dopaminergic_readCounts:144;neuron_PSI:0.735;dopaminergic_PSI:0.979	950	-	2910149	2910303	0	2	50,50	0,104
chrIII	2011061	2011310	neuron_readCounts:827;dopaminergic_readCounts:45;neuron_PSI:0.709;dopaminergic_PSI:0.192	950	-	2011061	2011310	0	2	50,50	0,199
chrIII	2010693	2011310	neuron_readCounts:388;dopaminergic_readCounts:162;neuron_PSI:0.291;dopaminergic_PSI:0.808	950	-	2010693	2011310	0	2	50,50	0,567
chrX	2069538	2069739	neuron_readCounts:62;dopaminergic_readCounts:111;neuron_PSI:0.555;dopaminergic_PSI:0.878	950	-	2069538	2069739	0	2	50,50	0,151
chrX	2068702	2069739	neuron_readCounts:51;dopaminergic_readCounts:13;neuron_PSI:0.445;dopaminergic_PSI:0.122	950	-	2068702	2069739	0	2	50,50	0,987
chrX	2068702	2069575	neuron_readCounts:67;dopaminergic_readCounts:178;neuron_PSI:0.6;dopaminergic_PSI:0.916	950	-	2068702	2069575	0	2	50,50	0,823
chrI	2133822	2134836	neuron_readCounts:59;dopaminergic_readCounts:7;neuron_PSI:0.658;dopaminergic_PSI:0.048	950	+	2133822	2134836	0	2	50,50	0,964
chrI	2128723	2134836	neuron_readCounts:45;dopaminergic_readCounts:138;neuron_PSI:0.342;dopaminergic_PSI:0.952	950	+	2128723	2134836	0	2	50,50	0,6063
chrV	2196269	2196716	neuron_readCounts:143;dopaminergic_readCounts:194;neuron_PSI:0.623;dopaminergic_PSI:0.86	950	+	2196269	2196716	0	2	50,50	0,397
chrV	2196269	2196469	neuron_readCounts:102;dopaminergic_readCounts:33;neuron_PSI:0.377;dopaminergic_PSI:0.14	950	+	2196269	2196469	0	2	50,50	0,150
chrI	3340549	3340697	neuron_readCounts:1581;dopaminergic_readCounts:922;neuron_PSI:0.78;dopaminergic_PSI:0.503	950	-	3340549	3340697	0	2	50,50	0,98
chrI	3340555	3340697	neuron_readCounts:391;dopaminergic_readCounts:908;neuron_PSI:0.192;dopaminergic_PSI:0.457	950	-	3340555	3340697	0	2	50,50	0,92
chrI	3340546	3340697	neuron_readCounts:55;dopaminergic_readCounts:97;neuron_PSI:0.028;dopaminergic_PSI:0.039	950	-	3340546	3340697	0	2	50,50	0,101
chrIII	3502017	3502184	neuron_readCounts:340;dopaminergic_readCounts:876;neuron_PSI:0.713;dopaminergic_PSI:0.955	950	-	3502017	3502184	0	2	50,50	0,117
chrIII	3502010	3502184	neuron_readCounts:134;dopaminergic_readCounts:25;neuron_PSI:0.287;dopaminergic_PSI:0.045	950	-	3502010	3502184	0	2	50,50	0,124
chrIII	3507154	3507310	neuron_readCounts:223;dopaminergic_readCounts:91;neuron_PSI:0.831;dopaminergic_PSI:0.381	950	-	3507154	3507310	0	2	50,50	0,106
chrIII	3507160	3507310	neuron_readCounts:52;dopaminergic_readCounts:167;neuron_PSI:0.169;dopaminergic_PSI:0.619	950	-	3507160	3507310	0	2	50,50	0,100
chrX	3712604	3712855	neuron_readCounts:50;dopaminergic_readCounts:135;neuron_PSI:0.035;dopaminergic_PSI:0.567	950	+	3712604	3712855	0	2	50,50	0,201
chrX	3712339	3712855	neuron_readCounts:1348;dopaminergic_readCounts:101;neuron_PSI:0.965;dopaminergic_PSI:0.433	950	+	3712339	3712855	0	2	50,50	0,466
chrIV	3723488	3724115	neuron_readCounts:59;dopaminergic_readCounts:133;neuron_PSI:0.054;dopaminergic_PSI:0.416	950	-	3723488	3724115	0	2	50,50	0,577
chrIV	3723479	3724115	neuron_readCounts:913;dopaminergic_readCounts:196;neuron_PSI:0.946;dopaminergic_PSI:0.584	950	-	3723479	3724115	0	2	50,50	0,586
chrI	3733653	3734389	neuron_readCounts:911;dopaminergic_readCounts:3566;neuron_PSI:0.398;dopaminergic_PSI:0.983	950	-	3733653	3734389	0	2	50,50	0,686
chrI	3733653	3734482	neuron_readCounts:1374;dopaminergic_readCounts:25;neuron_PSI:0.602;dopaminergic_PSI:0.017	950	-	3733653	3734482	0	2	50,50	0,779
chrIII	2556628	2556986	neuron_readCounts:251;dopaminergic_readCounts:121;neuron_PSI:0.28;dopaminergic_PSI:0.67	950	+	2556628	2556986	0	2	50,50	0,308
chrIII	2556628	2557672	neuron_readCounts:665;dopaminergic_readCounts:42;neuron_PSI:0.72;dopaminergic_PSI:0.33	950	+	2556628	2557672	0	2	50,50	0,994
chrIII	2556949	2557672	neuron_readCounts:300;dopaminergic_readCounts:126;neuron_PSI:0.316;dopaminergic_PSI:0.716	950	+	2556949	2557672	0	2	50,50	0,673
chrI	2614439	2615126	neuron_readCounts:2635;dopaminergic_readCounts:1378;neuron_PSI:0.725;dopaminergic_PSI:0.939	950	+	2614439	2615126	0	2	50,50	0,637
chrI	2614439	2614846	neuron_readCounts:990;dopaminergic_readCounts:45;neuron_PSI:0.275;dopaminergic_PSI:0.061	950	+	2614439	2614846	0	2	50,50	0,357
chrIII	2010693	2010968	neuron_readCounts:106;dopaminergic_readCounts:2;neuron_PSI:0.077;dopaminergic_PSI:0.019	950	-	2010693	2010968	0	2	50,50	0,225
chrIII	2010693	2011093	neuron_readCounts:968;dopaminergic_readCounts:29;neuron_PSI:0.655;dopaminergic_PSI:0.129	950	-	2010693	2011093	0	2	50,50	0,350
chrV	4188482	4188658	neuron_readCounts:861;dopaminergic_readCounts:2293;neuron_PSI:0.467;dopaminergic_PSI:0.272	950	+	4188482	4188658	0	2	50,50	0,126
chrV	4188482	4188663	neuron_readCounts:995;dopaminergic_readCounts:7107;neuron_PSI:0.533;dopaminergic_PSI:0.728	950	+	4188482	4188663	0	2	50,50	0,131
chrIII	4339569	4340064	neuron_readCounts:735;dopaminergic_readCounts:335;neuron_PSI:0.794;dopaminergic_PSI:0.48	950	+	4339569	4340064	0	2	50,50	0,445
chrIII	4339569	4340067	neuron_readCounts:73;dopaminergic_readCounts:55;neuron_PSI:0.085;dopaminergic_PSI:0.05	950	+	4339569	4340067	0	2	50,50	0,448
chrIII	4339569	4340055	neuron_readCounts:120;dopaminergic_readCounts:413;neuron_PSI:0.121;dopaminergic_PSI:0.47	950	+	4339569	4340055	0	2	50,50	0,436
chrV	4372843	4373001	neuron_readCounts:1644;dopaminergic_readCounts:1260;neuron_PSI:0.796;dopaminergic_PSI:0.537	950	+	4372843	4373001	0	2	50,50	0,108
chrV	4372843	4372986	neuron_readCounts:391;dopaminergic_readCounts:1285;neuron_PSI:0.204;dopaminergic_PSI:0.463	950	+	4372843	4372986	0	2	50,50	0,93
chrII	3017057	3017234	neuron_readCounts:47;dopaminergic_readCounts:180;neuron_PSI:0.393;dopaminergic_PSI:0.863	950	+	3017057	3017234	0	2	50,50	0,127
chrII	3017057	3017397	neuron_readCounts:65;dopaminergic_readCounts:39;neuron_PSI:0.607;dopaminergic_PSI:0.137	950	+	3017057	3017397	0	2	50,50	0,290
chrII	3017153	3017397	neuron_readCounts:46;dopaminergic_readCounts:139;neuron_PSI:0.441;dopaminergic_PSI:0.827	950	+	3017153	3017397	0	2	50,50	0,194
chrI	4526662	4527791	neuron_readCounts:165;dopaminergic_readCounts:659;neuron_PSI:0.153;dopaminergic_PSI:0.497	950	-	4526662	4527791	0	2	50,50	0,1079
chrI	4526653	4527791	neuron_readCounts:812;dopaminergic_readCounts:760;neuron_PSI:0.847;dopaminergic_PSI:0.503	950	-	4526653	4527791	0	2	50,50	0,1088
chrI	4529091	4529921	neuron_readCounts:162;dopaminergic_readCounts:272;neuron_PSI:0.122;dopaminergic_PSI:0.398	950	-	4529091	4529921	0	2	50,50	0,780
chrI	4529085	4529921	neuron_readCounts:1124;dopaminergic_readCounts:339;neuron_PSI:0.878;dopaminergic_PSI:0.602	950	-	4529085	4529921	0	2	50,50	0,786
chrI	4529959	4530109	neuron_readCounts:205;dopaminergic_readCounts:265;neuron_PSI:0.216;dopaminergic_PSI:0.612	950	-	4529959	4530109	0	2	50,50	0,100
chrI	4529953	4530109	neuron_readCounts:733;dopaminergic_readCounts:126;neuron_PSI:0.784;dopaminergic_PSI:0.388	950	-	4529953	4530109	0	2	50,50	0,106
chrIV	4551187	4552069	neuron_readCounts:181;dopaminergic_readCounts:161;neuron_PSI:0.927;dopaminergic_PSI:0.554	950	+	4551187	4552069	0	2	50,50	0,832
chrIV	4551187	4552057	neuron_readCounts:14;dopaminergic_readCounts:160;neuron_PSI:0.073;dopaminergic_PSI:0.446	950	+	4551187	4552057	0	2	50,50	0,820
chrV	4571907	4572353	neuron_readCounts:706;dopaminergic_readCounts:849;neuron_PSI:0.964;dopaminergic_PSI:0.707	950	+	4571907	4572353	0	2	50,50	0,396
chrV	4571907	4572347	neuron_readCounts:27;dopaminergic_readCounts:382;neuron_PSI:0.036;dopaminergic_PSI:0.293	950	+	4571907	4572347	0	2	50,50	0,390
chrIII	4581312	4581454	neuron_readCounts:252;dopaminergic_readCounts:394;neuron_PSI:0.176;dopaminergic_PSI:0.463	950	+	4581312	4581454	0	2	50,50	0,92
chrIII	4581312	4581463	neuron_readCounts:895;dopaminergic_readCounts:463;neuron_PSI:0.824;dopaminergic_PSI:0.537	950	+	4581312	4581463	0	2	50,50	0,101
chrIII	3063059	3064010	neuron_readCounts:85;dopaminergic_readCounts:283;neuron_PSI:0.09;dopaminergic_PSI:0.574	950	-	3063059	3064010	0	2	50,50	0,901
chrIII	3062835	3064010	neuron_readCounts:794;dopaminergic_readCounts:181;neuron_PSI:0.91;dopaminergic_PSI:0.426	950	-	3062835	3064010	0	2	50,50	0,1125
chrI	3075202	3076613	neuron_readCounts:76;dopaminergic_readCounts:27;neuron_PSI:0.061;dopaminergic_PSI:0.024	950	-	3075202	3076613	0	2	50,50	0,1361
chrI	3072922	3076613	neuron_readCounts:326;dopaminergic_readCounts:683;neuron_PSI:0.235;dopaminergic_PSI:0.554	950	-	3072922	3076613	0	2	50,50	0,3641
chrI	3075217	3076613	neuron_readCounts:935;dopaminergic_readCounts:518;neuron_PSI:0.704;dopaminergic_PSI:0.422	950	-	3075217	3076613	0	2	50,50	0,1346
chrI	3072922	3075185	neuron_readCounts:1039;dopaminergic_readCounts:549;neuron_PSI:0.77;dopaminergic_PSI:0.47	950	-	3072922	3075185	0	2	50,50	0,2213
chrIV	3105254	3110032	neuron_readCounts:4490;dopaminergic_readCounts:2451;neuron_PSI:0.784;dopaminergic_PSI:0.536	950	-	3105254	3110032	0	2	50,50	0,4728
chrIV	3105254	3116671	neuron_readCounts:977;dopaminergic_readCounts:1785;neuron_PSI:0.216;dopaminergic_PSI:0.464	950	-	3105254	3116671	0	2	50,50	0,11367
chrI	4676596	4677725	neuron_readCounts:3913;dopaminergic_readCounts:489;neuron_PSI:0.92;dopaminergic_PSI:0.505	950	+	4676596	4677725	0	2	50,50	0,1079
chrI	4676596	4677719	neuron_readCounts:358;dopaminergic_readCounts:655;neuron_PSI:0.08;dopaminergic_PSI:0.495	950	+	4676596	4677719	0	2	50,50	0,1073
chrI	4677674	4678617	neuron_readCounts:460;dopaminergic_readCounts:624;neuron_PSI:0.095;dopaminergic_PSI:0.382	950	+	4677674	4678617	0	2	50,50	0,893
chrI	4677674	4678623	neuron_readCounts:4164;dopaminergic_readCounts:737;neuron_PSI:0.905;dopaminergic_PSI:0.618	950	+	4677674	4678623	0	2	50,50	0,899
chrV	4687138	4687289	neuron_readCounts:1026;dopaminergic_readCounts:643;neuron_PSI:0.775;dopaminergic_PSI:0.355	950	+	4687138	4687289	0	2	50,50	0,101
chrV	4687138	4687280	neuron_readCounts:342;dopaminergic_readCounts:905;neuron_PSI:0.225;dopaminergic_PSI:0.645	950	+	4687138	4687280	0	2	50,50	0,92
chrX	3172536	3173119	neuron_readCounts:1504;dopaminergic_readCounts:113;neuron_PSI:0.321;dopaminergic_PSI:0.115	950	-	3172536	3173119	0	2	50,50	0,533
chrX	3172140	3173119	neuron_readCounts:3271;dopaminergic_readCounts:1060;neuron_PSI:0.679;dopaminergic_PSI:0.885	950	-	3172140	3173119	0	2	50,50	0,929
chrIII	4774167	4775235	neuron_readCounts:147;dopaminergic_readCounts:722;neuron_PSI:0.71;dopaminergic_PSI:0.991	950	+	4774167	4775235	0	2	50,50	0,1018
chrIII	4775064	4775235	neuron_readCounts:67;dopaminergic_readCounts:2;neuron_PSI:0.29;dopaminergic_PSI:0.009	950	+	4775064	4775235	0	2	50,50	0,121
chrIII	3420394	3421945	neuron_readCounts:123;dopaminergic_readCounts:320;neuron_PSI:0.542;dopaminergic_PSI:0.911	950	+	3420394	3421945	0	2	50,50	0,1501
chrIII	3420394	3421174	neuron_readCounts:103;dopaminergic_readCounts:20;neuron_PSI:0.458;dopaminergic_PSI:0.089	950	+	3420394	3421174	0	2	50,50	0,730
chrIII	3421158	3421945	neuron_readCounts:102;dopaminergic_readCounts:84;neuron_PSI:0.46;dopaminergic_PSI:0.279	950	+	3421158	3421945	0	2	50,50	0,737
chrI	3422383	3423258	neuron_readCounts:567;dopaminergic_readCounts:836;neuron_PSI:0.564;dopaminergic_PSI:0.811	950	+	3422383	3423258	0	2	50,50	0,825
chrI	3422383	3423929	neuron_readCounts:468;dopaminergic_readCounts:185;neuron_PSI:0.436;dopaminergic_PSI:0.189	950	+	3422383	3423929	0	2	50,50	0,1496
chrI	3506190	3508271	neuron_readCounts:932;dopaminergic_readCounts:968;neuron_PSI:0.55;dopaminergic_PSI:0.777	950	+	3506190	3508271	0	2	50,50	0,2031
chrI	3506190	3507139	neuron_readCounts:865;dopaminergic_readCounts:263;neuron_PSI:0.45;dopaminergic_PSI:0.223	950	+	3506190	3507139	0	2	50,50	0,899
chrV	5306160	5306568	neuron_readCounts:59;dopaminergic_readCounts:70;neuron_PSI:0.747;dopaminergic_PSI:0.308	950	+	5306160	5306568	0	2	50,50	0,358
chrV	5306160	5306577	neuron_readCounts:17;dopaminergic_readCounts:97;neuron_PSI:0.253;dopaminergic_PSI:0.692	950	+	5306160	5306577	0	2	50,50	0,367
chrX	3539773	3539945	neuron_readCounts:211;dopaminergic_readCounts:155;neuron_PSI:0.131;dopaminergic_PSI:0.788	950	+	3539773	3539945	0	2	50,50	0,122
chrX	3539292	3539945	neuron_readCounts:1408;dopaminergic_readCounts:40;neuron_PSI:0.559;dopaminergic_PSI:0.054	950	+	3539292	3539945	0	2	50,50	0,603
chrX	3539292	3540552	neuron_readCounts:927;dopaminergic_readCounts:1425;neuron_PSI:0.441;dopaminergic_PSI:0.946	950	+	3539292	3540552	0	2	50,50	0,1210
chrX	3539902	3540552	neuron_readCounts:2033;dopaminergic_readCounts:217;neuron_PSI:0.633;dopaminergic_PSI:0.195	950	+	3539902	3540552	0	2	50,50	0,600
chrI	5430655	5430810	neuron_readCounts:596;dopaminergic_readCounts:936;neuron_PSI:0.139;dopaminergic_PSI:0.409	950	+	5430655	5430810	0	2	50,50	0,105
chrI	5430655	5430822	neuron_readCounts:4891;dopaminergic_readCounts:1297;neuron_PSI:0.861;dopaminergic_PSI:0.591	950	+	5430655	5430822	0	2	50,50	0,117
chrI	3689307	3689565	neuron_readCounts:185;dopaminergic_readCounts:604;neuron_PSI:0.261;dopaminergic_PSI:0.473	950	+	3689307	3689565	0	2	50,50	0,208
chrI	3688525	3689565	neuron_readCounts:570;dopaminergic_readCounts:629;neuron_PSI:0.739;dopaminergic_PSI:0.527	950	+	3688525	3689565	0	2	50,50	0,990
chrX	5590277	5590526	neuron_readCounts:690;dopaminergic_readCounts:196;neuron_PSI:0.684;dopaminergic_PSI:0.975	950	+	5590277	5590526	0	2	50,50	0,199
chrX	5587748	5590526	neuron_readCounts:412;dopaminergic_readCounts:3;neuron_PSI:0.316;dopaminergic_PSI:0.025	950	+	5587748	5590526	0	2	50,50	0,2728
chrI	3731420	3731564	neuron_readCounts:45;dopaminergic_readCounts:233;neuron_PSI:0.558;dopaminergic_PSI:0.882	950	+	3731420	3731564	0	2	50,50	0,94
chrI	3731420	3731789	neuron_readCounts:39;dopaminergic_readCounts:25;neuron_PSI:0.442;dopaminergic_PSI:0.118	950	+	3731420	3731789	0	2	50,50	0,319
chrI	3800229	3801884	neuron_readCounts:103;dopaminergic_readCounts:179;neuron_PSI:0.1;dopaminergic_PSI:0.781	950	-	3800229	3801884	0	2	50,50	0,1605
chrI	3800920	3801884	neuron_readCounts:904;dopaminergic_readCounts:20;neuron_PSI:0.9;dopaminergic_PSI:0.219	950	-	3800920	3801884	0	2	50,50	0,914
chrX	3800641	3801414	neuron_readCounts:9461;dopaminergic_readCounts:119;neuron_PSI:0.852;dopaminergic_PSI:0.381	950	-	3800641	3801414	0	2	50,50	0,723
chrX	3801184	3801414	neuron_readCounts:1827;dopaminergic_readCounts:248;neuron_PSI:0.148;dopaminergic_PSI:0.619	950	-	3801184	3801414	0	2	50,50	0,180
chrX	3801557	3801914	neuron_readCounts:101;dopaminergic_readCounts:99;neuron_PSI:0.02;dopaminergic_PSI:0.657	950	-	3801557	3801914	0	2	50,50	0,307
chrX	3801736	3801914	neuron_readCounts:4935;dopaminergic_readCounts:56;neuron_PSI:0.98;dopaminergic_PSI:0.343	950	-	3801736	3801914	0	2	50,50	0,128
chrX	3801557	3801797	neuron_readCounts:5129;dopaminergic_readCounts:12;neuron_PSI:0.981;dopaminergic_PSI:0.176	950	-	3801557	3801797	0	2	50,50	0,190
chrIII	3846294	3846548	neuron_readCounts:230;dopaminergic_readCounts:597;neuron_PSI:0.662;dopaminergic_PSI:0.946	950	+	3846294	3846548	0	2	50,50	0,204
chrIII	3846294	3847048	neuron_readCounts:118;dopaminergic_readCounts:6;neuron_PSI:0.338;dopaminergic_PSI:0.054	950	+	3846294	3847048	0	2	50,50	0,704
chrIII	5832725	5832884	neuron_readCounts:56;dopaminergic_readCounts:119;neuron_PSI:0.486;dopaminergic_PSI:0.819	950	-	5832725	5832884	0	2	50,50	0,109
chrIII	5832734	5832884	neuron_readCounts:60;dopaminergic_readCounts:31;neuron_PSI:0.514;dopaminergic_PSI:0.181	950	-	5832734	5832884	0	2	50,50	0,100
chrII	3966036	3966435	neuron_readCounts:13;dopaminergic_readCounts:63;neuron_PSI:0.11;dopaminergic_PSI:0.798	950	+	3966036	3966435	0	2	50,50	0,349
chrII	3965504	3966435	neuron_readCounts:96;dopaminergic_readCounts:19;neuron_PSI:0.89;dopaminergic_PSI:0.202	950	+	3965504	3966435	0	2	50,50	0,881
chrIII	6018993	6019135	neuron_readCounts:23;dopaminergic_readCounts:55;neuron_PSI:0.218;dopaminergic_PSI:0.584	950	-	6018993	6019135	0	2	50,50	0,92
chrIII	6018987	6019135	neuron_readCounts:74;dopaminergic_readCounts:37;neuron_PSI:0.782;dopaminergic_PSI:0.416	950	-	6018987	6019135	0	2	50,50	0,98
chrII	6023752	6024043	neuron_readCounts:339;dopaminergic_readCounts:505;neuron_PSI:0.541;dopaminergic_PSI:0.968	950	-	6023752	6024043	0	2	50,50	0,241
chrII	6023752	6024058	neuron_readCounts:380;dopaminergic_readCounts:8;neuron_PSI:0.459;dopaminergic_PSI:0.032	950	-	6023752	6024058	0	2	50,50	0,256
chrIV	4027013	4034807	neuron_readCounts:227;dopaminergic_readCounts:12;neuron_PSI:0.839;dopaminergic_PSI:0.182	950	-	4027013	4034807	0	2	50,50	0,7744
chrIV	4027013	4027956	neuron_readCounts:44;dopaminergic_readCounts:68;neuron_PSI:0.161;dopaminergic_PSI:0.818	950	-	4027013	4027956	0	2	50,50	0,893
chrIII	6057989	6058139	neuron_readCounts:137;dopaminergic_readCounts:4;neuron_PSI:0.26;dopaminergic_PSI:0.004	950	+	6057989	6058139	0	2	50,50	0,100
chrIII	6057381	6058139	neuron_readCounts:490;dopaminergic_readCounts:1570;neuron_PSI:0.74;dopaminergic_PSI:0.996	950	+	6057381	6058139	0	2	50,50	0,708
chrIII	6226205	6226891	neuron_readCounts:315;dopaminergic_readCounts:483;neuron_PSI:0.548;dopaminergic_PSI:0.872	950	-	6226205	6226891	0	2	50,50	0,636
chrIII	6226517	6226891	neuron_readCounts:307;dopaminergic_readCounts:57;neuron_PSI:0.452;dopaminergic_PSI:0.128	950	-	6226517	6226891	0	2	50,50	0,324
chrIV	4178506	4179312	neuron_readCounts:90;dopaminergic_readCounts:30;neuron_PSI:0.324;dopaminergic_PSI:0.098	950	+	4178506	4179312	0	2	50,50	0,756
chrIV	4178506	4178785	neuron_readCounts:172;dopaminergic_readCounts:357;neuron_PSI:0.676;dopaminergic_PSI:0.902	950	+	4178506	4178785	0	2	50,50	0,229
chrII	4188916	4204880	neuron_readCounts:37;dopaminergic_readCounts:198;neuron_PSI:0.152;dopaminergic_PSI:0.827	950	+	4188916	4204880	0	2	50,50	0,15914
chrII	4188916	4192057	neuron_readCounts:580;dopaminergic_readCounts:23;neuron_PSI:0.848;dopaminergic_PSI:0.173	950	+	4188916	4192057	0	2	50,50	0,3091
chrV	4206693	4208213	neuron_readCounts:261;dopaminergic_readCounts:87;neuron_PSI:0.488;dopaminergic_PSI:0.201	950	+	4206693	4208213	0	2	50,50	0,1470
chrV	4206693	4209034	neuron_readCounts:282;dopaminergic_readCounts:336;neuron_PSI:0.512;dopaminergic_PSI:0.799	950	+	4206693	4209034	0	2	50,50	0,2291
chrI	6358698	6358847	neuron_readCounts:364;dopaminergic_readCounts:100;neuron_PSI:0.679;dopaminergic_PSI:0.222	950	+	6358698	6358847	0	2	50,50	0,99
chrI	6358698	6358841	neuron_readCounts:219;dopaminergic_readCounts:399;neuron_PSI:0.321;dopaminergic_PSI:0.778	950	+	6358698	6358841	0	2	50,50	0,93
chrIII	6449684	6449861	neuron_readCounts:54;dopaminergic_readCounts:142;neuron_PSI:0.218;dopaminergic_PSI:0.584	950	-	6449684	6449861	0	2	50,50	0,127
chrIII	6449678	6449861	neuron_readCounts:184;dopaminergic_readCounts:104;neuron_PSI:0.782;dopaminergic_PSI:0.416	950	-	6449678	6449861	0	2	50,50	0,133
chrX	4330629	4331196	neuron_readCounts:95;dopaminergic_readCounts:29;neuron_PSI:0.656;dopaminergic_PSI:0.095	950	-	4330629	4331196	0	2	50,50	0,517
chrX	4331050	4331196	neuron_readCounts:83;dopaminergic_readCounts:318;neuron_PSI:0.344;dopaminergic_PSI:0.905	950	-	4331050	4331196	0	2	50,50	0,96
chrII	6540103	6546771	neuron_readCounts:43;dopaminergic_readCounts:92;neuron_PSI:0.514;dopaminergic_PSI:0.934	950	+	6540103	6546771	0	2	50,50	0,6618
chrII	6540103	6540843	neuron_readCounts:22;dopaminergic_readCounts:2;neuron_PSI:0.271;dopaminergic_PSI:0.022	950	+	6540103	6540843	0	2	50,50	0,690
chrII	6540103	6541172	neuron_readCounts:13;dopaminergic_readCounts:2;neuron_PSI:0.153;dopaminergic_PSI:0.022	950	+	6540103	6541172	0	2	50,50	0,1019
chrII	6540103	6542830	neuron_readCounts:6;dopaminergic_readCounts:2;neuron_PSI:0.062;dopaminergic_PSI:0.022	950	+	6540103	6542830	0	2	50,50	0,2677
chrX	4390039	4390881	neuron_readCounts:762;dopaminergic_readCounts:59;neuron_PSI:0.834;dopaminergic_PSI:0.367	950	+	4390039	4390881	0	2	50,50	0,792
chrX	4390039	4391088	neuron_readCounts:150;dopaminergic_readCounts:177;neuron_PSI:0.166;dopaminergic_PSI:0.633	950	+	4390039	4391088	0	2	50,50	0,999
chrX	4390799	4391088	neuron_readCounts:796;dopaminergic_readCounts:48;neuron_PSI:0.842;dopaminergic_PSI:0.333	950	+	4390799	4391088	0	2	50,50	0,239
chrI	4460309	4469191	neuron_readCounts:4;dopaminergic_readCounts:27;neuron_PSI:0.002;dopaminergic_PSI:0.139	950	+	4460309	4469191	0	2	50,50	0,8832
chrI	4458599	4469191	neuron_readCounts:39;dopaminergic_readCounts:134;neuron_PSI:0.018;dopaminergic_PSI:0.771	950	+	4458599	4469191	0	2	50,50	0,10542
chrI	4468149	4469191	neuron_readCounts:2818;dopaminergic_readCounts:14;neuron_PSI:0.98;dopaminergic_PSI:0.09	950	+	4468149	4469191	0	2	50,50	0,992
chrIII	6733080	6733234	neuron_readCounts:1891;dopaminergic_readCounts:296;neuron_PSI:0.904;dopaminergic_PSI:0.522	950	+	6733080	6733234	0	2	50,50	0,104
chrIII	6733080	6733228	neuron_readCounts:208;dopaminergic_readCounts:228;neuron_PSI:0.096;dopaminergic_PSI:0.478	950	+	6733080	6733228	0	2	50,50	0,98
chrII	4492070	4492254	neuron_readCounts:2558;dopaminergic_readCounts:216;neuron_PSI:0.852;dopaminergic_PSI:0.138	950	-	4492070	4492254	0	2	50,50	0,134
chrII	4491729	4492254	neuron_readCounts:405;dopaminergic_readCounts:1318;neuron_PSI:0.148;dopaminergic_PSI:0.862	950	-	4491729	4492254	0	2	50,50	0,475
chrII	4491729	4492136	neuron_readCounts:2714;dopaminergic_readCounts:224;neuron_PSI:0.858;dopaminergic_PSI:0.145	950	-	4491729	4492136	0	2	50,50	0,357
chrII	4492775	4493357	neuron_readCounts:91;dopaminergic_readCounts:269;neuron_PSI:0.06;dopaminergic_PSI:0.475	950	-	4492775	4493357	0	2	50,50	0,532
chrII	4492775	4500147	neuron_readCounts:1459;dopaminergic_readCounts:273;neuron_PSI:0.94;dopaminergic_PSI:0.525	950	-	4492775	4500147	0	2	50,50	0,7322
chrV	4497539	4501268	neuron_readCounts:69;dopaminergic_readCounts:113;neuron_PSI:0.208;dopaminergic_PSI:0.802	950	+	4497539	4501268	0	2	50,50	0,3679
chrV	4499757	4501268	neuron_readCounts:269;dopaminergic_readCounts:34;neuron_PSI:0.792;dopaminergic_PSI:0.198	950	+	4499757	4501268	0	2	50,50	0,1461
chrV	4505070	4505878	neuron_readCounts:233;dopaminergic_readCounts:279;neuron_PSI:0.131;dopaminergic_PSI:0.498	950	+	4505070	4505878	0	2	50,50	0,758
chrV	4505466	4505878	neuron_readCounts:1582;dopaminergic_readCounts:412;neuron_PSI:0.869;dopaminergic_PSI:0.502	950	+	4505466	4505878	0	2	50,50	0,362
chrX	4518635	4519570	neuron_readCounts:2362;dopaminergic_readCounts:63;neuron_PSI:0.85;dopaminergic_PSI:0.081	950	-	4518635	4519570	0	2	50,50	0,885
chrX	4519403	4519570	neuron_readCounts:415;dopaminergic_readCounts:624;neuron_PSI:0.15;dopaminergic_PSI:0.919	950	-	4519403	4519570	0	2	50,50	0,117
chrX	4518635	4519401	neuron_readCounts:456;dopaminergic_readCounts:510;neuron_PSI:0.164;dopaminergic_PSI:0.908	950	-	4518635	4519401	0	2	50,50	0,716
chrI	6795856	6796072	neuron_readCounts:284;dopaminergic_readCounts:236;neuron_PSI:0.681;dopaminergic_PSI:0.456	950	+	6795856	6796072	0	2	50,50	0,166
chrI	6795856	6796057	neuron_readCounts:133;dopaminergic_readCounts:286;neuron_PSI:0.319;dopaminergic_PSI:0.544	950	+	6795856	6796057	0	2	50,50	0,151
chrII	6854093	6854243	neuron_readCounts:1046;dopaminergic_readCounts:545;neuron_PSI:0.836;dopaminergic_PSI:0.525	950	-	6854093	6854243	0	2	50,50	0,100
chrII	6854099	6854243	neuron_readCounts:240;dopaminergic_readCounts:521;neuron_PSI:0.164;dopaminergic_PSI:0.475	950	-	6854099	6854243	0	2	50,50	0,94
chrV	4578013	4578262	neuron_readCounts:975;dopaminergic_readCounts:331;neuron_PSI:0.677;dopaminergic_PSI:0.198	950	+	4578013	4578262	0	2	50,50	0,199
chrV	4578013	4582755	neuron_readCounts:463;dopaminergic_readCounts:986;neuron_PSI:0.323;dopaminergic_PSI:0.802	950	+	4578013	4582755	0	2	50,50	0,4692
chrII	4587198	4588188	neuron_readCounts:207;dopaminergic_readCounts:140;neuron_PSI:0.648;dopaminergic_PSI:0.931	950	+	4587198	4588188	0	2	50,50	0,940
chrII	4587198	4589058	neuron_readCounts:114;dopaminergic_readCounts:7;neuron_PSI:0.352;dopaminergic_PSI:0.069	950	+	4587198	4589058	0	2	50,50	0,1810
chrII	4588187	4589058	neuron_readCounts:223;dopaminergic_readCounts:163;neuron_PSI:0.65;dopaminergic_PSI:0.945	950	+	4588187	4589058	0	2	50,50	0,821
chrII	4609817	4610093	neuron_readCounts:59;dopaminergic_readCounts:147;neuron_PSI:0.19;dopaminergic_PSI:0.982	950	+	4609817	4610093	0	2	50,50	0,226
chrII	4609817	4609980	neuron_readCounts:225;dopaminergic_readCounts:2;neuron_PSI:0.81;dopaminergic_PSI:0.018	950	+	4609817	4609980	0	2	50,50	0,113
chrII	4609904	4610093	neuron_readCounts:239;dopaminergic_readCounts:2;neuron_PSI:0.812;dopaminergic_PSI:0.018	950	+	4609904	4610093	0	2	50,50	0,139
chrII	6953618	6953838	neuron_readCounts:581;dopaminergic_readCounts:255;neuron_PSI:0.857;dopaminergic_PSI:0.501	950	+	6953618	6953838	0	2	50,50	0,170
chrII	6953618	6953832	neuron_readCounts:110;dopaminergic_readCounts:263;neuron_PSI:0.143;dopaminergic_PSI:0.499	950	+	6953618	6953832	0	2	50,50	0,164
chrV	4644834	4645401	neuron_readCounts:47;dopaminergic_readCounts:2;neuron_PSI:0.29;dopaminergic_PSI:0.015	950	+	4644834	4645401	0	2	50,50	0,517
chrV	4643995	4645401	neuron_readCounts:111;dopaminergic_readCounts:138;neuron_PSI:0.71;dopaminergic_PSI:0.985	950	+	4643995	4645401	0	2	50,50	0,1356
chrII	7027133	7027282	neuron_readCounts:96;dopaminergic_readCounts:23;neuron_PSI:0.746;dopaminergic_PSI:0.38	950	+	7027133	7027282	0	2	50,50	0,99
chrII	7027133	7027276	neuron_readCounts:29;dopaminergic_readCounts:39;neuron_PSI:0.254;dopaminergic_PSI:0.62	950	+	7027133	7027276	0	2	50,50	0,93
chrII	7055834	7055982	neuron_readCounts:1847;dopaminergic_readCounts:1063;neuron_PSI:0.829;dopaminergic_PSI:0.548	950	+	7055834	7055982	0	2	50,50	0,98
chrII	7055834	7055975	neuron_readCounts:423;dopaminergic_readCounts:835;neuron_PSI:0.171;dopaminergic_PSI:0.452	950	+	7055834	7055975	0	2	50,50	0,91
chrX	3554977	3556489	neuron_readCounts:91;dopaminergic_readCounts:2;neuron_PSI:0.256;dopaminergic_PSI:0.011	950	+	3554977	3556489	0	2	50,50	0,1462
chrX	3556288	3556489	neuron_readCounts:48;dopaminergic_readCounts:63;neuron_PSI:0.133;dopaminergic_PSI:0.287	950	+	3556288	3556489	0	2	50,50	0,151
chrX	3552876	3556489	neuron_readCounts:173;dopaminergic_readCounts:143;neuron_PSI:0.488;dopaminergic_PSI:0.691	950	+	3552876	3556489	0	2	50,50	0,3563
chrX	3556055	3556489	neuron_readCounts:43;dopaminergic_readCounts:2;neuron_PSI:0.123;dopaminergic_PSI:0.011	950	+	3556055	3556489	0	2	50,50	0,384
chrIII	7132690	7132935	neuron_readCounts:305;dopaminergic_readCounts:509;neuron_PSI:0.904;dopaminergic_PSI:0.623	950	-	7132690	7132935	0	2	50,50	0,195
chrIII	7132690	7132911	neuron_readCounts:32;dopaminergic_readCounts:255;neuron_PSI:0.096;dopaminergic_PSI:0.377	950	-	7132690	7132911	0	2	50,50	0,171
chrX	4855005	4855201	neuron_readCounts:992;dopaminergic_readCounts:224;neuron_PSI:0.552;dopaminergic_PSI:0.922	950	-	4855005	4855201	0	2	50,50	0,146
chrX	4854823	4855201	neuron_readCounts:794;dopaminergic_readCounts:22;neuron_PSI:0.448;dopaminergic_PSI:0.078	950	-	4854823	4855201	0	2	50,50	0,328
chrX	4857481	4857850	neuron_readCounts:204;dopaminergic_readCounts:2;neuron_PSI:0.384;dopaminergic_PSI:0.038	950	-	4857481	4857850	0	2	50,50	0,319
chrX	4857693	4857850	neuron_readCounts:324;dopaminergic_readCounts:56;neuron_PSI:0.616;dopaminergic_PSI:0.962	950	-	4857693	4857850	0	2	50,50	0,107
chrIII	7333372	7333657	neuron_readCounts:185;dopaminergic_readCounts:79;neuron_PSI:0.791;dopaminergic_PSI:0.519	950	-	7333372	7333657	0	2	50,50	0,235
chrIII	7333381	7333657	neuron_readCounts:67;dopaminergic_readCounts:85;neuron_PSI:0.209;dopaminergic_PSI:0.481	950	-	7333381	7333657	0	2	50,50	0,226
chrX	4922791	4922979	neuron_readCounts:1486;dopaminergic_readCounts:25;neuron_PSI:0.729;dopaminergic_PSI:0.034	950	-	4922791	4922979	0	2	50,50	0,138
chrX	4922038	4922979	neuron_readCounts:574;dopaminergic_readCounts:824;neuron_PSI:0.271;dopaminergic_PSI:0.966	950	-	4922038	4922979	0	2	50,50	0,891
chrX	4922038	4922756	neuron_readCounts:2670;dopaminergic_readCounts:65;neuron_PSI:0.807;dopaminergic_PSI:0.095	950	-	4922038	4922756	0	2	50,50	0,668
chrII	4952481	4952696	neuron_readCounts:162;dopaminergic_readCounts:77;neuron_PSI:0.564;dopaminergic_PSI:0.181	950	+	4952481	4952696	0	2	50,50	0,165
chrII	4952342	4952696	neuron_readCounts:139;dopaminergic_readCounts:666;neuron_PSI:0.436;dopaminergic_PSI:0.819	950	+	4952342	4952696	0	2	50,50	0,304
chrI	4999640	4999839	neuron_readCounts:29;dopaminergic_readCounts:66;neuron_PSI:0.36;dopaminergic_PSI:0.807	950	+	4999640	4999839	0	2	50,50	0,149
chrI	4999640	5000286	neuron_readCounts:53;dopaminergic_readCounts:14;neuron_PSI:0.64;dopaminergic_PSI:0.193	950	+	4999640	5000286	0	2	50,50	0,596
chrIII	5011266	5011522	neuron_readCounts:282;dopaminergic_readCounts:462;neuron_PSI:0.336;dopaminergic_PSI:0.851	950	-	5011266	5011522	0	2	50,50	0,206
chrIII	5010939	5011522	neuron_readCounts:553;dopaminergic_readCounts:63;neuron_PSI:0.664;dopaminergic_PSI:0.149	950	-	5010939	5011522	0	2	50,50	0,533
chrIII	5010939	5011189	neuron_readCounts:379;dopaminergic_readCounts:812;neuron_PSI:0.398;dopaminergic_PSI:0.901	950	-	5010939	5011189	0	2	50,50	0,200
chrIII	5019485	5019888	neuron_readCounts:79;dopaminergic_readCounts:667;neuron_PSI:0.147;dopaminergic_PSI:0.421	950	+	5019485	5019888	0	2	50,50	0,353
chrIII	5019485	5019894	neuron_readCounts:264;dopaminergic_readCounts:715;neuron_PSI:0.506;dopaminergic_PSI:0.54	950	+	5019485	5019894	0	2	50,50	0,359
chrIII	5019485	5020243	neuron_readCounts:180;dopaminergic_readCounts:55;neuron_PSI:0.346;dopaminergic_PSI:0.038	950	+	5019485	5020243	0	2	50,50	0,708
chrIII	5019884	5020243	neuron_readCounts:361;dopaminergic_readCounts:1184;neuron_PSI:0.66;dopaminergic_PSI:0.958	950	+	5019884	5020243	0	2	50,50	0,309
chrIV	7550977	7551418	neuron_readCounts:556;dopaminergic_readCounts:1408;neuron_PSI:0.448;dopaminergic_PSI:0.76	950	+	7550977	7551418	0	2	50,50	0,391
chrIV	7550977	7551424	neuron_readCounts:599;dopaminergic_readCounts:445;neuron_PSI:0.552;dopaminergic_PSI:0.24	950	+	7550977	7551424	0	2	50,50	0,397
chrV	5060506	5061011	neuron_readCounts:14;dopaminergic_readCounts:138;neuron_PSI:0.061;dopaminergic_PSI:0.884	950	-	5060506	5061011	0	2	50,50	0,455
chrV	5060154	5061011	neuron_readCounts:214;dopaminergic_readCounts:20;neuron_PSI:0.939;dopaminergic_PSI:0.116	950	-	5060154	5061011	0	2	50,50	0,807
chrV	5060154	5060363	neuron_readCounts:22;dopaminergic_readCounts:119;neuron_PSI:0.093;dopaminergic_PSI:0.858	950	-	5060154	5060363	0	2	50,50	0,159
chrI	3800229	3800858	neuron_readCounts:1677;dopaminergic_readCounts:61;neuron_PSI:0.869;dopaminergic_PSI:0.211	950	-	3800229	3800858	0	2	50,50	0,579
chrI	3800229	3803060	neuron_readCounts:150;dopaminergic_readCounts:91;neuron_PSI:0.08;dopaminergic_PSI:0.33	950	-	3800229	3803060	0	2	50,50	0,2781
chrII	7606179	7606329	neuron_readCounts:454;dopaminergic_readCounts:788;neuron_PSI:0.627;dopaminergic_PSI:0.38	950	+	7606179	7606329	0	2	50,50	0,100
chrII	7606179	7606320	neuron_readCounts:266;dopaminergic_readCounts:1158;neuron_PSI:0.373;dopaminergic_PSI:0.62	950	+	7606179	7606320	0	2	50,50	0,91
chrX	5140754	5140975	neuron_readCounts:257;dopaminergic_readCounts:11;neuron_PSI:0.873;dopaminergic_PSI:0.083	950	+	5140754	5140975	0	2	50,50	0,171
chrX	5139397	5140975	neuron_readCounts:40;dopaminergic_readCounts:95;neuron_PSI:0.127;dopaminergic_PSI:0.917	950	+	5139397	5140975	0	2	50,50	0,1528
chrI	3860533	3862009	neuron_readCounts:123;dopaminergic_readCounts:95;neuron_PSI:0.076;dopaminergic_PSI:0.142	950	-	3860533	3862009	0	2	50,50	0,1426
chrI	3860533	3861811	neuron_readCounts:352;dopaminergic_readCounts:28;neuron_PSI:0.222;dopaminergic_PSI:0.075	950	-	3860533	3861811	0	2	50,50	0,1228
chrI	3860533	3860691	neuron_readCounts:407;dopaminergic_readCounts:578;neuron_PSI:0.266;dopaminergic_PSI:0.585	950	-	3860533	3860691	0	2	50,50	0,108
chrI	3860533	3862547	neuron_readCounts:693;dopaminergic_readCounts:159;neuron_PSI:0.436;dopaminergic_PSI:0.198	950	-	3860533	3862547	0	2	50,50	0,1964
chrII	5180569	5183737	neuron_readCounts:364;dopaminergic_readCounts:1000;neuron_PSI:0.312;dopaminergic_PSI:0.818	950	-	5180569	5183737	0	2	50,50	0,3118
chrII	5180569	5180863	neuron_readCounts:802;dopaminergic_readCounts:203;neuron_PSI:0.688;dopaminergic_PSI:0.182	950	-	5180569	5180863	0	2	50,50	0,244
chrI	7775102	7775251	neuron_readCounts:161;dopaminergic_readCounts:49;neuron_PSI:0.889;dopaminergic_PSI:0.607	950	+	7775102	7775251	0	2	50,50	0,99
chrI	7775102	7775245	neuron_readCounts:19;dopaminergic_readCounts:31;neuron_PSI:0.111;dopaminergic_PSI:0.393	950	+	7775102	7775245	0	2	50,50	0,93
chrII	5203458	5204719	neuron_readCounts:108;dopaminergic_readCounts:6;neuron_PSI:0.579;dopaminergic_PSI:0.035	950	+	5203458	5204719	0	2	50,50	0,1211
chrII	5203458	5204837	neuron_readCounts:73;dopaminergic_readCounts:224;neuron_PSI:0.421;dopaminergic_PSI:0.965	950	+	5203458	5204837	0	2	50,50	0,1329
chrII	5204513	5204837	neuron_readCounts:9;dopaminergic_readCounts:160;neuron_PSI:0.035;dopaminergic_PSI:0.291	950	+	5204513	5204837	0	2	50,50	0,274
chrII	5204655	5204837	neuron_readCounts:128;dopaminergic_readCounts:21;neuron_PSI:0.595;dopaminergic_PSI:0.074	950	+	5204655	5204837	0	2	50,50	0,132
chrI	7854935	7855455	neuron_readCounts:191;dopaminergic_readCounts:7;neuron_PSI:0.638;dopaminergic_PSI:0.111	950	+	7854935	7855455	0	2	50,50	0,470
chrI	7854905	7855455	neuron_readCounts:104;dopaminergic_readCounts:87;neuron_PSI:0.362;dopaminergic_PSI:0.889	950	+	7854905	7855455	0	2	50,50	0,500
chrI	7858236	7858602	neuron_readCounts:1438;dopaminergic_readCounts:791;neuron_PSI:0.818;dopaminergic_PSI:0.47	950	-	7858236	7858602	0	2	50,50	0,316
chrI	7858243	7858602	neuron_readCounts:351;dopaminergic_readCounts:1254;neuron_PSI:0.182;dopaminergic_PSI:0.53	950	-	7858243	7858602	0	2	50,50	0,309
chrIII	5256708	5257054	neuron_readCounts:68;dopaminergic_readCounts:108;neuron_PSI:0.313;dopaminergic_PSI:0.529	950	+	5256708	5257054	0	2	50,50	0,296
chrIII	5256708	5256907	neuron_readCounts:176;dopaminergic_readCounts:64;neuron_PSI:0.687;dopaminergic_PSI:0.471	950	+	5256708	5256907	0	2	50,50	0,149
chrIII	8007952	8008111	neuron_readCounts:263;dopaminergic_readCounts:180;neuron_PSI:0.615;dopaminergic_PSI:0.299	950	-	8007952	8008111	0	2	50,50	0,109
chrIII	8007958	8008111	neuron_readCounts:161;dopaminergic_readCounts:387;neuron_PSI:0.385;dopaminergic_PSI:0.701	950	-	8007958	8008111	0	2	50,50	0,103
chrV	8012695	8012899	neuron_readCounts:514;dopaminergic_readCounts:1464;neuron_PSI:0.099;dopaminergic_PSI:0.474	950	-	8012695	8012899	0	2	50,50	0,154
chrV	8012689	8012899	neuron_readCounts:4322;dopaminergic_readCounts:1424;neuron_PSI:0.901;dopaminergic_PSI:0.526	950	-	8012689	8012899	0	2	50,50	0,160
chrIII	8019800	8020007	neuron_readCounts:72;dopaminergic_readCounts:60;neuron_PSI:0.774;dopaminergic_PSI:0.341	950	-	8019800	8020007	0	2	50,50	0,157
chrIII	8019806	8020007	neuron_readCounts:21;dopaminergic_readCounts:134;neuron_PSI:0.226;dopaminergic_PSI:0.659	950	-	8019806	8020007	0	2	50,50	0,151
chrI	5360747	5362117	neuron_readCounts:1432;dopaminergic_readCounts:7;neuron_PSI:0.606;dopaminergic_PSI:0.028	950	+	5360747	5362117	0	2	50,50	0,1320
chrI	5360747	5363065	neuron_readCounts:927;dopaminergic_readCounts:729;neuron_PSI:0.394;dopaminergic_PSI:0.972	950	+	5360747	5363065	0	2	50,50	0,2268
chrI	5362068	5363065	neuron_readCounts:1441;dopaminergic_readCounts:9;neuron_PSI:0.61;dopaminergic_PSI:0.037	950	+	5362068	5363065	0	2	50,50	0,947
chrI	5376291	5384471	neuron_readCounts:140;dopaminergic_readCounts:499;neuron_PSI:0.311;dopaminergic_PSI:0.919	950	-	5376291	5384471	0	2	50,50	0,8130
chrI	5376291	5377352	neuron_readCounts:319;dopaminergic_readCounts:38;neuron_PSI:0.689;dopaminergic_PSI:0.081	950	-	5376291	5377352	0	2	50,50	0,1011
chrIV	8104620	8105213	neuron_readCounts:550;dopaminergic_readCounts:378;neuron_PSI:0.885;dopaminergic_PSI:0.484	950	-	8104620	8105213	0	2	50,50	0,543
chrIV	8104626	8105213	neuron_readCounts:93;dopaminergic_readCounts:377;neuron_PSI:0.115;dopaminergic_PSI:0.516	950	-	8104626	8105213	0	2	50,50	0,537
chrI	5403915	5404570	neuron_readCounts:578;dopaminergic_readCounts:335;neuron_PSI:0.751;dopaminergic_PSI:0.389	950	-	5403915	5404570	0	2	50,50	0,605
chrI	5404305	5404570	neuron_readCounts:197;dopaminergic_readCounts:754;neuron_PSI:0.249;dopaminergic_PSI:0.611	950	-	5404305	5404570	0	2	50,50	0,215
chrI	5407153	5407622	neuron_readCounts:64;dopaminergic_readCounts:32;neuron_PSI:0.57;dopaminergic_PSI:0.226	950	-	5407153	5407622	0	2	50,50	0,419
chrI	5407153	5407529	neuron_readCounts:37;dopaminergic_readCounts:104;neuron_PSI:0.43;dopaminergic_PSI:0.774	950	-	5407153	5407529	0	2	50,50	0,326
chrI	8112323	8113768	neuron_readCounts:270;dopaminergic_readCounts:3;neuron_PSI:0.309;dopaminergic_PSI:0.032	950	-	8112323	8113768	0	2	50,50	0,1395
chrI	8112344	8113768	neuron_readCounts:589;dopaminergic_readCounts:157;neuron_PSI:0.691;dopaminergic_PSI:0.968	950	-	8112344	8113768	0	2	50,50	0,1374
chrX	4060985	4063659	neuron_readCounts:107;dopaminergic_readCounts:2;neuron_PSI:0.088;dopaminergic_PSI:0.023	950	-	4060985	4063659	0	2	50,50	0,2624
chrX	4060985	4071446	neuron_readCounts:415;dopaminergic_readCounts:141;neuron_PSI:0.412;dopaminergic_PSI:0.717	950	-	4060985	4071446	0	2	50,50	0,10411
chrX	4060985	4061269	neuron_readCounts:225;dopaminergic_readCounts:2;neuron_PSI:0.222;dopaminergic_PSI:0.023	950	-	4060985	4061269	0	2	50,50	0,234
chrX	4060985	4079388	neuron_readCounts:313;dopaminergic_readCounts:61;neuron_PSI:0.279;dopaminergic_PSI:0.237	950	-	4060985	4079388	0	2	50,50	0,18353
chrII	5427431	5427623	neuron_readCounts:1736;dopaminergic_readCounts:715;neuron_PSI:0.653;dopaminergic_PSI:0.19	950	-	5427431	5427623	0	2	50,50	0,142
chrII	5426546	5427623	neuron_readCounts:938;dopaminergic_readCounts:1976;neuron_PSI:0.347;dopaminergic_PSI:0.81	950	-	5426546	5427623	0	2	50,50	0,1027
chrII	5426546	5427481	neuron_readCounts:1781;dopaminergic_readCounts:759;neuron_PSI:0.659;dopaminergic_PSI:0.204	950	-	5426546	5427481	0	2	50,50	0,885
chrIV	8148081	8148231	neuron_readCounts:1255;dopaminergic_readCounts:124;neuron_PSI:0.464;dopaminergic_PSI:0.737	950	+	8148081	8148231	0	2	50,50	0,100
chrIV	8148066	8148231	neuron_readCounts:1496;dopaminergic_readCounts:35;neuron_PSI:0.536;dopaminergic_PSI:0.263	950	+	8148066	8148231	0	2	50,50	0,115
chrIII	8160457	8160606	neuron_readCounts:337;dopaminergic_readCounts:120;neuron_PSI:0.874;dopaminergic_PSI:0.549	950	-	8160457	8160606	0	2	50,50	0,99
chrIII	8160464	8160606	neuron_readCounts:49;dopaminergic_readCounts:131;neuron_PSI:0.126;dopaminergic_PSI:0.451	950	-	8160464	8160606	0	2	50,50	0,92
chrII	8182589	8182839	neuron_readCounts:249;dopaminergic_readCounts:897;neuron_PSI:0.192;dopaminergic_PSI:0.52	950	-	8182589	8182839	0	2	50,50	0,200
chrII	8182576	8182839	neuron_readCounts:709;dopaminergic_readCounts:837;neuron_PSI:0.808;dopaminergic_PSI:0.48	950	-	8182576	8182839	0	2	50,50	0,213
chrI	5560025	5560359	neuron_readCounts:3569;dopaminergic_readCounts:574;neuron_PSI:0.984;dopaminergic_PSI:0.654	950	+	5560025	5560359	0	2	50,50	0,284
chrI	5560166	5560359	neuron_readCounts:50;dopaminergic_readCounts:255;neuron_PSI:0.016;dopaminergic_PSI:0.346	950	+	5560166	5560359	0	2	50,50	0,143
chrV	5577211	5577937	neuron_readCounts:2233;dopaminergic_readCounts:1149;neuron_PSI:0.217;dopaminergic_PSI:0.634	950	-	5577211	5577937	0	2	50,50	0,676
chrV	5576644	5577937	neuron_readCounts:9782;dopaminergic_readCounts:427;neuron_PSI:0.783;dopaminergic_PSI:0.366	950	-	5576644	5577937	0	2	50,50	0,1243
chrI	5590578	5591600	neuron_readCounts:59;dopaminergic_readCounts:490;neuron_PSI:0.091;dopaminergic_PSI:0.406	950	-	5590578	5591600	0	2	50,50	0,972
chrI	5587878	5591600	neuron_readCounts:594;dopaminergic_readCounts:893;neuron_PSI:0.909;dopaminergic_PSI:0.594	950	-	5587878	5591600	0	2	50,50	0,3672
chrII	5589877	5590842	neuron_readCounts:1257;dopaminergic_readCounts:630;neuron_PSI:0.719;dopaminergic_PSI:0.165	950	-	5589877	5590842	0	2	50,50	0,915
chrII	5590561	5590842	neuron_readCounts:530;dopaminergic_readCounts:2413;neuron_PSI:0.281;dopaminergic_PSI:0.835	950	-	5590561	5590842	0	2	50,50	0,231
chrI	8399152	8399302	neuron_readCounts:687;dopaminergic_readCounts:1020;neuron_PSI:0.38;dopaminergic_PSI:0.599	950	+	8399152	8399302	0	2	50,50	0,100
chrI	8399152	8399308	neuron_readCounts:1086;dopaminergic_readCounts:615;neuron_PSI:0.62;dopaminergic_PSI:0.401	950	+	8399152	8399308	0	2	50,50	0,106
chrV	5607625	5607785	neuron_readCounts:269;dopaminergic_readCounts:4;neuron_PSI:0.284;dopaminergic_PSI:0.041	950	+	5607625	5607785	0	2	50,50	0,110
chrV	5607317	5607785	neuron_readCounts:733;dopaminergic_readCounts:372;neuron_PSI:0.716;dopaminergic_PSI:0.959	950	+	5607317	5607785	0	2	50,50	0,418
chrIV	5607943	5608361	neuron_readCounts:143;dopaminergic_readCounts:209;neuron_PSI:0.446;dopaminergic_PSI:0.823	950	+	5607943	5608361	0	2	50,50	0,368
chrIV	5607943	5608418	neuron_readCounts:147;dopaminergic_readCounts:42;neuron_PSI:0.443;dopaminergic_PSI:0.163	950	+	5607943	5608418	0	2	50,50	0,425
chrIV	5607943	5608547	neuron_readCounts:40;dopaminergic_readCounts:2;neuron_PSI:0.111;dopaminergic_PSI:0.014	950	+	5607943	5608547	0	2	50,50	0,554
chrIII	5612968	5613433	neuron_readCounts:173;dopaminergic_readCounts:163;neuron_PSI:0.491;dopaminergic_PSI:0.751	950	+	5612968	5613433	0	2	50,50	0,415
chrIII	5613121	5613433	neuron_readCounts:162;dopaminergic_readCounts:32;neuron_PSI:0.509;dopaminergic_PSI:0.249	950	+	5613121	5613433	0	2	50,50	0,262
chrI	8422757	8422903	neuron_readCounts:120;dopaminergic_readCounts:316;neuron_PSI:0.256;dopaminergic_PSI:0.719	950	+	8422757	8422903	0	2	50,50	0,96
chrI	8422757	8422909	neuron_readCounts:336;dopaminergic_readCounts:126;neuron_PSI:0.744;dopaminergic_PSI:0.281	950	+	8422757	8422909	0	2	50,50	0,102
chrV	5619151	5620020	neuron_readCounts:149;dopaminergic_readCounts:44;neuron_PSI:0.514;dopaminergic_PSI:0.082	950	-	5619151	5620020	0	2	50,50	0,819
chrV	5619151	5619293	neuron_readCounts:125;dopaminergic_readCounts:306;neuron_PSI:0.486;dopaminergic_PSI:0.918	950	-	5619151	5619293	0	2	50,50	0,92
chrIII	5626822	5628718	neuron_readCounts:11;dopaminergic_readCounts:110;neuron_PSI:0.058;dopaminergic_PSI:0.263	950	+	5626822	5628718	0	2	50,50	0,1846
chrIII	5626822	5628545	neuron_readCounts:193;dopaminergic_readCounts:220;neuron_PSI:0.942;dopaminergic_PSI:0.737	950	+	5626822	5628545	0	2	50,50	0,1673
chrIII	5628508	5628718	neuron_readCounts:210;dopaminergic_readCounts:153;neuron_PSI:0.949;dopaminergic_PSI:0.682	950	+	5628508	5628718	0	2	50,50	0,160
chrI	5635349	5636766	neuron_readCounts:634;dopaminergic_readCounts:870;neuron_PSI:0.384;dopaminergic_PSI:0.886	950	+	5635349	5636766	0	2	50,50	0,1367
chrI	5635349	5635691	neuron_readCounts:1015;dopaminergic_readCounts:158;neuron_PSI:0.616;dopaminergic_PSI:0.114	950	+	5635349	5635691	0	2	50,50	0,292
chrII	8453908	8454064	neuron_readCounts:70;dopaminergic_readCounts:145;neuron_PSI:0.644;dopaminergic_PSI:0.299	950	-	8453908	8454064	0	2	50,50	0,106
chrII	8453916	8454064	neuron_readCounts:33;dopaminergic_readCounts:564;neuron_PSI:0.356;dopaminergic_PSI:0.701	950	-	8453916	8454064	0	2	50,50	0,98
chrX	8474257	8474411	neuron_readCounts:1487;dopaminergic_readCounts:177;neuron_PSI:0.614;dopaminergic_PSI:0.309	950	-	8474257	8474411	0	2	50,50	0,104
chrX	8474265	8474411	neuron_readCounts:968;dopaminergic_readCounts:431;neuron_PSI:0.386;dopaminergic_PSI:0.691	950	-	8474265	8474411	0	2	50,50	0,96
chrIV	5652622	5652916	neuron_readCounts:346;dopaminergic_readCounts:102;neuron_PSI:0.326;dopaminergic_PSI:0.104	950	-	5652622	5652916	0	2	50,50	0,244
chrIV	5652622	5653398	neuron_readCounts:737;dopaminergic_readCounts:889;neuron_PSI:0.674;dopaminergic_PSI:0.896	950	-	5652622	5653398	0	2	50,50	0,726
chrIII	5674139	5674770	neuron_readCounts:42;dopaminergic_readCounts:146;neuron_PSI:0.126;dopaminergic_PSI:0.358	950	+	5674139	5674770	0	2	50,50	0,581
chrIII	5673330	5674770	neuron_readCounts:292;dopaminergic_readCounts:271;neuron_PSI:0.874;dopaminergic_PSI:0.642	950	+	5673330	5674770	0	2	50,50	0,1390
chrI	8530658	8530802	neuron_readCounts:14;dopaminergic_readCounts:170;neuron_PSI:0.07;dopaminergic_PSI:0.306	950	-	8530658	8530802	0	2	50,50	0,94
chrI	8530658	8530806	neuron_readCounts:173;dopaminergic_readCounts:330;neuron_PSI:0.93;dopaminergic_PSI:0.694	950	-	8530658	8530806	0	2	50,50	0,98
chrI	8574289	8574482	neuron_readCounts:4022;dopaminergic_readCounts:686;neuron_PSI:0.942;dopaminergic_PSI:0.504	950	-	8574289	8574482	0	2	50,50	0,143
chrI	8574295	8574482	neuron_readCounts:353;dopaminergic_readCounts:561;neuron_PSI:0.058;dopaminergic_PSI:0.496	950	-	8574295	8574482	0	2	50,50	0,137
chrI	5762076	5762675	neuron_readCounts:81;dopaminergic_readCounts:127;neuron_PSI:0.083;dopaminergic_PSI:0.329	950	-	5762076	5762675	0	2	50,50	0,549
chrI	5762076	5762385	neuron_readCounts:893;dopaminergic_readCounts:241;neuron_PSI:0.917;dopaminergic_PSI:0.671	950	-	5762076	5762385	0	2	50,50	0,259
chrIV	8747368	8747824	neuron_readCounts:7;dopaminergic_readCounts:7;neuron_PSI:0.078;dopaminergic_PSI:0.074	950	+	8747368	8747824	0	2	50,50	0,406
chrIV	8746772	8747490	neuron_readCounts:24;dopaminergic_readCounts:2;neuron_PSI:0.298;dopaminergic_PSI:0.028	950	+	8746772	8747490	0	2	50,50	0,668
chrIV	8747368	8747815	neuron_readCounts:21;dopaminergic_readCounts:2;neuron_PSI:0.247;dopaminergic_PSI:0.028	950	+	8747368	8747815	0	2	50,50	0,397
chrIV	8746772	8747824	neuron_readCounts:10;dopaminergic_readCounts:12;neuron_PSI:0.116;dopaminergic_PSI:0.245	950	+	8746772	8747824	0	2	50,50	0,1002
chrIV	8746772	8747815	neuron_readCounts:22;dopaminergic_readCounts:83;neuron_PSI:0.262;dopaminergic_PSI:0.626	950	+	8746772	8747815	0	2	50,50	0,993
chrIV	8792392	8792607	neuron_readCounts:236;dopaminergic_readCounts:25;neuron_PSI:0.4;dopaminergic_PSI:0.218	950	-	8792392	8792607	0	2	50,50	0,165
chrIV	8792392	8792616	neuron_readCounts:361;dopaminergic_readCounts:91;neuron_PSI:0.6;dopaminergic_PSI:0.782	950	-	8792392	8792616	0	2	50,50	0,174
chrIII	5879983	5881102	neuron_readCounts:151;dopaminergic_readCounts:801;neuron_PSI:0.358;dopaminergic_PSI:0.752	950	+	5879983	5881102	0	2	50,50	0,1069
chrIII	5880879	5881102	neuron_readCounts:267;dopaminergic_readCounts:227;neuron_PSI:0.642;dopaminergic_PSI:0.248	950	+	5880879	5881102	0	2	50,50	0,173
chrIII	8829062	8829209	neuron_readCounts:1411;dopaminergic_readCounts:1812;neuron_PSI:0.919;dopaminergic_PSI:0.71	950	-	8829062	8829209	0	2	50,50	0,97
chrIII	8829068	8829209	neuron_readCounts:136;dopaminergic_readCounts:701;neuron_PSI:0.081;dopaminergic_PSI:0.29	950	-	8829068	8829209	0	2	50,50	0,91
chrIII	8829742	8829897	neuron_readCounts:3210;dopaminergic_readCounts:1173;neuron_PSI:0.909;dopaminergic_PSI:0.632	950	-	8829742	8829897	0	2	50,50	0,105
chrIII	8829754	8829897	neuron_readCounts:301;dopaminergic_readCounts:682;neuron_PSI:0.091;dopaminergic_PSI:0.368	950	-	8829754	8829897	0	2	50,50	0,93
chrIII	5890627	5891294	neuron_readCounts:561;dopaminergic_readCounts:26;neuron_PSI:0.735;dopaminergic_PSI:0.094	950	-	5890627	5891294	0	2	50,50	0,617
chrIII	5954345	5957741	neuron_readCounts:448;dopaminergic_readCounts:529;neuron_PSI:0.277;dopaminergic_PSI:0.572	950	-	5954345	5957741	0	2	50,50	0,3346
chrIII	5956784	5957741	neuron_readCounts:1357;dopaminergic_readCounts:445;neuron_PSI:0.723;dopaminergic_PSI:0.428	950	-	5956784	5957741	0	2	50,50	0,907
chrIV	5981372	5982484	neuron_readCounts:61;dopaminergic_readCounts:114;neuron_PSI:0.173;dopaminergic_PSI:0.806	950	+	5981372	5982484	0	2	50,50	0,1062
chrIV	5981372	5982332	neuron_readCounts:267;dopaminergic_readCounts:25;neuron_PSI:0.827;dopaminergic_PSI:0.194	950	+	5981372	5982332	0	2	50,50	0,910
chrIV	5982250	5982484	neuron_readCounts:226;dopaminergic_readCounts:19;neuron_PSI:0.801;dopaminergic_PSI:0.162	950	+	5982250	5982484	0	2	50,50	0,184
chrIV	8983798	8983997	neuron_readCounts:228;dopaminergic_readCounts:1658;neuron_PSI:0.245;dopaminergic_PSI:0.5	950	+	8983798	8983997	0	2	50,50	0,149
chrIV	8983798	8984004	neuron_readCounts:823;dopaminergic_readCounts:1382;neuron_PSI:0.755;dopaminergic_PSI:0.5	950	+	8983798	8984004	0	2	50,50	0,156
chrV	8991133	8991382	neuron_readCounts:174;dopaminergic_readCounts:176;neuron_PSI:0.594;dopaminergic_PSI:0.907	950	+	8991133	8991382	0	2	50,50	0,199
chrV	8991133	8991439	neuron_readCounts:99;dopaminergic_readCounts:26;neuron_PSI:0.406;dopaminergic_PSI:0.093	950	+	8991133	8991439	0	2	50,50	0,256
chrII	8998839	8998991	neuron_readCounts:1652;dopaminergic_readCounts:675;neuron_PSI:0.709;dopaminergic_PSI:0.283	950	+	8998839	8998991	0	2	50,50	0,102
chrII	8998839	8998982	neuron_readCounts:722;dopaminergic_readCounts:1924;neuron_PSI:0.291;dopaminergic_PSI:0.717	950	+	8998839	8998982	0	2	50,50	0,93
chrIII	6004591	6004854	neuron_readCounts:1083;dopaminergic_readCounts:820;neuron_PSI:0.252;dopaminergic_PSI:0.736	950	+	6004591	6004854	0	2	50,50	0,213
chrIII	6004591	6005300	neuron_readCounts:3352;dopaminergic_readCounts:283;neuron_PSI:0.748;dopaminergic_PSI:0.264	950	+	6004591	6005300	0	2	50,50	0,659
chrIII	6004898	6005300	neuron_readCounts:1106;dopaminergic_readCounts:949;neuron_PSI:0.256;dopaminergic_PSI:0.762	950	+	6004898	6005300	0	2	50,50	0,352
chrIII	9058171	9058322	neuron_readCounts:1600;dopaminergic_readCounts:1013;neuron_PSI:0.74;dopaminergic_PSI:0.398	950	+	9058171	9058322	0	2	50,50	0,101
chrIII	9058171	9058313	neuron_readCounts:556;dopaminergic_readCounts:2004;neuron_PSI:0.26;dopaminergic_PSI:0.602	950	+	9058171	9058313	0	2	50,50	0,92
chrI	9102847	9103096	neuron_readCounts:639;dopaminergic_readCounts:729;neuron_PSI:0.367;dopaminergic_PSI:0.721	950	-	9102847	9103096	0	2	50,50	0,199
chrI	9102847	9103048	neuron_readCounts:1093;dopaminergic_readCounts:303;neuron_PSI:0.633;dopaminergic_PSI:0.279	950	-	9102847	9103048	0	2	50,50	0,151
chrI	9104974	9105744	neuron_readCounts:92;dopaminergic_readCounts:9;neuron_PSI:0.279;dopaminergic_PSI:0.041	950	-	9104974	9105744	0	2	50,50	0,720
chrI	9104974	9105909	neuron_readCounts:249;dopaminergic_readCounts:180;neuron_PSI:0.721;dopaminergic_PSI:0.959	950	-	9104974	9105909	0	2	50,50	0,885
chrI	9121140	9121790	neuron_readCounts:147;dopaminergic_readCounts:278;neuron_PSI:0.763;dopaminergic_PSI:0.573	950	+	9121140	9121790	0	2	50,50	0,600
chrI	9121140	9121783	neuron_readCounts:36;dopaminergic_readCounts:181;neuron_PSI:0.237;dopaminergic_PSI:0.427	950	+	9121140	9121783	0	2	50,50	0,593
chrI	9134388	9135036	neuron_readCounts:1921;dopaminergic_readCounts:652;neuron_PSI:0.868;dopaminergic_PSI:0.558	950	+	9134388	9135036	0	2	50,50	0,598
chrI	9134388	9135024	neuron_readCounts:364;dopaminergic_readCounts:662;neuron_PSI:0.132;dopaminergic_PSI:0.442	950	+	9134388	9135024	0	2	50,50	0,586
chrIII	6126754	6127087	neuron_readCounts:4365;dopaminergic_readCounts:1923;neuron_PSI:0.74;dopaminergic_PSI:0.961	950	-	6126754	6127087	0	2	50,50	0,283
chrIII	6125596	6127087	neuron_readCounts:1540;dopaminergic_readCounts:101;neuron_PSI:0.26;dopaminergic_PSI:0.039	950	-	6125596	6127087	0	2	50,50	0,1441
chrIII	6130000	6130830	neuron_readCounts:1699;dopaminergic_readCounts:221;neuron_PSI:0.756;dopaminergic_PSI:0.384	950	-	6130000	6130830	0	2	50,50	0,780
chrIII	6130440	6130830	neuron_readCounts:554;dopaminergic_readCounts:321;neuron_PSI:0.244;dopaminergic_PSI:0.616	950	-	6130440	6130830	0	2	50,50	0,340
chrIII	6130000	6130261	neuron_readCounts:714;dopaminergic_readCounts:704;neuron_PSI:0.298;dopaminergic_PSI:0.774	950	-	6130000	6130261	0	2	50,50	0,211
chrIII	6131697	6136164	neuron_readCounts:758;dopaminergic_readCounts:307;neuron_PSI:0.897;dopaminergic_PSI:0.67	950	-	6131697	6136164	0	2	50,50	0,4417
chrIII	6133054	6136164	neuron_readCounts:86;dopaminergic_readCounts:193;neuron_PSI:0.103;dopaminergic_PSI:0.33	950	-	6133054	6136164	0	2	50,50	0,3060
chrIV	6154069	6154275	neuron_readCounts:26;dopaminergic_readCounts:126;neuron_PSI:0.087;dopaminergic_PSI:0.632	950	+	6154069	6154275	0	2	50,50	0,156
chrIV	6153764	6154275	neuron_readCounts:315;dopaminergic_readCounts:55;neuron_PSI:0.913;dopaminergic_PSI:0.368	950	+	6153764	6154275	0	2	50,50	0,461
chrII	6197669	6197855	neuron_readCounts:2615;dopaminergic_readCounts:4364;neuron_PSI:0.498;dopaminergic_PSI:0.955	950	+	6197669	6197855	0	2	50,50	0,136
chrII	6197669	6198076	neuron_readCounts:2981;dopaminergic_readCounts:139;neuron_PSI:0.502;dopaminergic_PSI:0.045	950	+	6197669	6198076	0	2	50,50	0,357
chrII	6197918	6198076	neuron_readCounts:2499;dopaminergic_readCounts:3697;neuron_PSI:0.475;dopaminergic_PSI:0.959	950	+	6197918	6198076	0	2	50,50	0,108
chrII	9322331	9322474	neuron_readCounts:88;dopaminergic_readCounts:535;neuron_PSI:0.02;dopaminergic_PSI:0.271	950	-	9322331	9322474	0	2	50,50	0,93
chrII	9322324	9322474	neuron_readCounts:3620;dopaminergic_readCounts:1291;neuron_PSI:0.98;dopaminergic_PSI:0.729	950	-	9322324	9322474	0	2	50,50	0,100
chrIII	6363515	6363735	neuron_readCounts:28;dopaminergic_readCounts:107;neuron_PSI:0.063;dopaminergic_PSI:0.308	950	+	6363515	6363735	0	2	50,50	0,170
chrIII	6358632	6363735	neuron_readCounts:552;dopaminergic_readCounts:188;neuron_PSI:0.937;dopaminergic_PSI:0.692	950	+	6358632	6363735	0	2	50,50	0,5053
chrIII	9593272	9594278	neuron_readCounts:287;dopaminergic_readCounts:57;neuron_PSI:0.936;dopaminergic_PSI:0.398	950	-	9593272	9594278	0	2	50,50	0,956
chrIII	9593272	9594196	neuron_readCounts:6;dopaminergic_readCounts:84;neuron_PSI:0.064;dopaminergic_PSI:0.602	950	-	9593272	9594196	0	2	50,50	0,874
chrII	9670996	9671305	neuron_readCounts:912;dopaminergic_readCounts:644;neuron_PSI:0.781;dopaminergic_PSI:0.438	950	+	9670996	9671305	0	2	50,50	0,259
chrII	9670996	9671299	neuron_readCounts:376;dopaminergic_readCounts:816;neuron_PSI:0.219;dopaminergic_PSI:0.562	950	+	9670996	9671299	0	2	50,50	0,253
chrII	9699358	9699507	neuron_readCounts:57;dopaminergic_readCounts:349;neuron_PSI:0.858;dopaminergic_PSI:0.633	950	-	9699358	9699507	0	2	50,50	0,99
chrII	9699358	9699512	neuron_readCounts:9;dopaminergic_readCounts:196;neuron_PSI:0.142;dopaminergic_PSI:0.367	950	-	9699358	9699512	0	2	50,50	0,104
chrX	4854823	4855369	neuron_readCounts:798;dopaminergic_readCounts:43;neuron_PSI:0.297;dopaminergic_PSI:0.153	950	-	4854823	4855369	0	2	50,50	0,496
chrX	4854823	4855015	neuron_readCounts:1181;dopaminergic_readCounts:201;neuron_PSI:0.414;dopaminergic_PSI:0.777	950	-	4854823	4855015	0	2	50,50	0,142
chrII	9749753	9749898	neuron_readCounts:1586;dopaminergic_readCounts:4631;neuron_PSI:0.315;dopaminergic_PSI:0.714	950	+	9749753	9749898	0	2	50,50	0,95
chrII	9749753	9749905	neuron_readCounts:3272;dopaminergic_readCounts:1591;neuron_PSI:0.685;dopaminergic_PSI:0.286	950	+	9749753	9749905	0	2	50,50	0,102
chrV	9776274	9776712	neuron_readCounts:553;dopaminergic_readCounts:732;neuron_PSI:0.231;dopaminergic_PSI:0.606	950	-	9776274	9776712	0	2	50,50	0,388
chrV	9776267	9776712	neuron_readCounts:1587;dopaminergic_readCounts:490;neuron_PSI:0.769;dopaminergic_PSI:0.394	950	-	9776267	9776712	0	2	50,50	0,395
chrI	9781468	9781613	neuron_readCounts:185;dopaminergic_readCounts:1002;neuron_PSI:0.493;dopaminergic_PSI:0.814	950	-	9781468	9781613	0	2	50,50	0,95
chrI	9781459	9781613	neuron_readCounts:144;dopaminergic_readCounts:241;neuron_PSI:0.507;dopaminergic_PSI:0.186	950	-	9781459	9781613	0	2	50,50	0,104
chrIII	9784838	9784984	neuron_readCounts:49;dopaminergic_readCounts:248;neuron_PSI:0.074;dopaminergic_PSI:0.29	950	+	9784838	9784984	0	2	50,50	0,96
chrIII	9784838	9784992	neuron_readCounts:612;dopaminergic_readCounts:611;neuron_PSI:0.926;dopaminergic_PSI:0.71	950	+	9784838	9784992	0	2	50,50	0,104
chrII	9930281	9930503	neuron_readCounts:613;dopaminergic_readCounts:1115;neuron_PSI:0.495;dopaminergic_PSI:0.256	950	+	9930281	9930503	0	2	50,50	0,172
chrII	9930281	9930497	neuron_readCounts:733;dopaminergic_readCounts:3338;neuron_PSI:0.505;dopaminergic_PSI:0.744	950	+	9930281	9930497	0	2	50,50	0,166
chrIII	6701300	6702220	neuron_readCounts:1104;dopaminergic_readCounts:36;neuron_PSI:0.681;dopaminergic_PSI:0.313	950	+	6701300	6702220	0	2	50,50	0,870
chrIII	6701423	6702220	neuron_readCounts:8;dopaminergic_readCounts:68;neuron_PSI:0.007;dopaminergic_PSI:0.527	950	+	6701423	6702220	0	2	50,50	0,747
chrIII	6700536	6702220	neuron_readCounts:514;dopaminergic_readCounts:25;neuron_PSI:0.311;dopaminergic_PSI:0.16	950	+	6700536	6702220	0	2	50,50	0,1634
chrIII	10115883	10116025	neuron_readCounts:81;dopaminergic_readCounts:107;neuron_PSI:0.144;dopaminergic_PSI:0.408	950	+	10115883	10116025	0	2	50,50	0,92
chrIII	10115883	10116033	neuron_readCounts:472;dopaminergic_readCounts:124;neuron_PSI:0.856;dopaminergic_PSI:0.592	950	+	10115883	10116033	0	2	50,50	0,100
chrI	6753752	6755214	neuron_readCounts:586;dopaminergic_readCounts:1115;neuron_PSI:0.209;dopaminergic_PSI:0.737	950	-	6753752	6755214	0	2	50,50	0,1412
chrI	6754614	6755214	neuron_readCounts:2217;dopaminergic_readCounts:512;neuron_PSI:0.791;dopaminergic_PSI:0.263	950	-	6754614	6755214	0	2	50,50	0,550
chrI	6753752	6754466	neuron_readCounts:3365;dopaminergic_readCounts:877;neuron_PSI:0.854;dopaminergic_PSI:0.4	950	-	6753752	6754466	0	2	50,50	0,664
chrX	10199552	10199813	neuron_readCounts:719;dopaminergic_readCounts:408;neuron_PSI:0.453;dopaminergic_PSI:0.676	950	+	10199552	10199813	0	2	50,50	0,211
chrX	10199552	10199855	neuron_readCounts:908;dopaminergic_readCounts:232;neuron_PSI:0.547;dopaminergic_PSI:0.324	950	+	10199552	10199855	0	2	50,50	0,253
chrII	6854215	6855017	neuron_readCounts:249;dopaminergic_readCounts:14;neuron_PSI:0.284;dopaminergic_PSI:0.011	950	-	6854215	6855017	0	2	50,50	0,752
chrII	6854797	6855017	neuron_readCounts:590;dopaminergic_readCounts:2073;neuron_PSI:0.716;dopaminergic_PSI:0.989	950	-	6854797	6855017	0	2	50,50	0,170
chrIV	10329145	10334176	neuron_readCounts:2599;dopaminergic_readCounts:203;neuron_PSI:0.416;dopaminergic_PSI:0.195	950	-	10329145	10334176	0	2	50,50	0,4981
chrIV	10329151	10334176	neuron_readCounts:3634;dopaminergic_readCounts:874;neuron_PSI:0.584;dopaminergic_PSI:0.805	950	-	10329151	10334176	0	2	50,50	0,4975
chrV	10363046	10363202	neuron_readCounts:197;dopaminergic_readCounts:55;neuron_PSI:0.774;dopaminergic_PSI:0.506	950	+	10363046	10363202	0	2	50,50	0,106
chrV	10363046	10363193	neuron_readCounts:51;dopaminergic_readCounts:54;neuron_PSI:0.226;dopaminergic_PSI:0.494	950	+	10363046	10363193	0	2	50,50	0,97
chrIII	6924829	6925405	neuron_readCounts:727;dopaminergic_readCounts:983;neuron_PSI:0.702;dopaminergic_PSI:0.964	950	-	6924829	6925405	0	2	50,50	0,526
chrIII	6924993	6925405	neuron_readCounts:304;dopaminergic_readCounts:32;neuron_PSI:0.298;dopaminergic_PSI:0.036	950	-	6924993	6925405	0	2	50,50	0,362
chrIII	6924829	6925057	neuron_readCounts:368;dopaminergic_readCounts:27;neuron_PSI:0.339;dopaminergic_PSI:0.019	950	-	6924829	6925057	0	2	50,50	0,178
chrI	6927708	6928532	neuron_readCounts:548;dopaminergic_readCounts:550;neuron_PSI:0.14;dopaminergic_PSI:0.439	950	+	6927708	6928532	0	2	50,50	0,774
chrI	6927708	6928045	neuron_readCounts:3439;dopaminergic_readCounts:931;neuron_PSI:0.86;dopaminergic_PSI:0.561	950	+	6927708	6928045	0	2	50,50	0,287
chrX	10400210	10400526	neuron_readCounts:120;dopaminergic_readCounts:257;neuron_PSI:0.305;dopaminergic_PSI:0.647	950	+	10400210	10400526	0	2	50,50	0,266
chrX	10400192	10400526	neuron_readCounts:265;dopaminergic_readCounts:153;neuron_PSI:0.695;dopaminergic_PSI:0.353	950	+	10400192	10400526	0	2	50,50	0,284
chrIII	10597082	10598096	neuron_readCounts:265;dopaminergic_readCounts:557;neuron_PSI:0.141;dopaminergic_PSI:0.444	950	-	10597082	10598096	0	2	50,50	0,964
chrIII	10597076	10598096	neuron_readCounts:1325;dopaminergic_readCounts:573;neuron_PSI:0.859;dopaminergic_PSI:0.556	950	-	10597076	10598096	0	2	50,50	0,970
chrIII	7074779	7075723	neuron_readCounts:23;dopaminergic_readCounts:400;neuron_PSI:0.381;dopaminergic_PSI:0.757	950	-	7074779	7075723	0	2	50,50	0,894
chrIII	7075260	7075723	neuron_readCounts:38;dopaminergic_readCounts:167;neuron_PSI:0.619;dopaminergic_PSI:0.243	950	-	7075260	7075723	0	2	50,50	0,413
chrIII	7074779	7075182	neuron_readCounts:80;dopaminergic_readCounts:304;neuron_PSI:0.769;dopaminergic_PSI:0.521	950	-	7074779	7075182	0	2	50,50	0,353
chrV	5307836	5308526	neuron_readCounts:31;dopaminergic_readCounts:2;neuron_PSI:0.142;dopaminergic_PSI:0.014	950	+	5307836	5308526	0	2	50,50	0,640
chrV	5307836	5308851	neuron_readCounts:186;dopaminergic_readCounts:86;neuron_PSI:0.673;dopaminergic_PSI:0.231	950	+	5307836	5308851	0	2	50,50	0,965
chrV	5307836	5308128	neuron_readCounts:40;dopaminergic_readCounts:249;neuron_PSI:0.186;dopaminergic_PSI:0.754	950	+	5307836	5308128	0	2	50,50	0,242
chrIV	7085807	7086232	neuron_readCounts:918;dopaminergic_readCounts:371;neuron_PSI:0.463;dopaminergic_PSI:0.155	950	-	7085807	7086232	0	2	50,50	0,375
chrIV	7086049	7086232	neuron_readCounts:1041;dopaminergic_readCounts:4774;neuron_PSI:0.537;dopaminergic_PSI:0.845	950	-	7086049	7086232	0	2	50,50	0,133
chrIV	7085807	7086116	neuron_readCounts:916;dopaminergic_readCounts:3862;neuron_PSI:0.509;dopaminergic_PSI:0.824	950	-	7085807	7086116	0	2	50,50	0,259
chrII	5334751	5338221	neuron_readCounts:176;dopaminergic_readCounts:150;neuron_PSI:0.339;dopaminergic_PSI:0.784	950	+	5334751	5338221	0	2	50,50	0,3420
chrII	5338070	5338221	neuron_readCounts:50;dopaminergic_readCounts:32;neuron_PSI:0.089;dopaminergic_PSI:0.174	950	+	5338070	5338221	0	2	50,50	0,101
chrII	5336512	5338221	neuron_readCounts:297;dopaminergic_readCounts:9;neuron_PSI:0.572;dopaminergic_PSI:0.042	950	+	5336512	5338221	0	2	50,50	0,1659
chrI	10699747	10701691	neuron_readCounts:107;dopaminergic_readCounts:142;neuron_PSI:0.301;dopaminergic_PSI:0.59	950	-	10699747	10701691	0	2	50,50	0,1894
chrI	10699747	10701616	neuron_readCounts:254;dopaminergic_readCounts:117;neuron_PSI:0.699;dopaminergic_PSI:0.41	950	-	10699747	10701616	0	2	50,50	0,1819
chrIV	7138452	7138958	neuron_readCounts:102;dopaminergic_readCounts:158;neuron_PSI:0.686;dopaminergic_PSI:0.987	950	-	7138452	7138958	0	2	50,50	0,456
chrIV	7138452	7138733	neuron_readCounts:47;dopaminergic_readCounts:2;neuron_PSI:0.314;dopaminergic_PSI:0.013	950	-	7138452	7138733	0	2	50,50	0,231
chrIII	10740556	10740694	neuron_readCounts:461;dopaminergic_readCounts:2705;neuron_PSI:0.056;dopaminergic_PSI:0.436	950	-	10740556	10740694	0	2	50,50	0,88
chrIII	10740547	10740694	neuron_readCounts:6754;dopaminergic_readCounts:3437;neuron_PSI:0.944;dopaminergic_PSI:0.564	950	-	10740547	10740694	0	2	50,50	0,97
chrIII	10752504	10753009	neuron_readCounts:179;dopaminergic_readCounts:455;neuron_PSI:0.107;dopaminergic_PSI:0.512	950	-	10752504	10753009	0	2	50,50	0,455
chrIII	10752498	10753009	neuron_readCounts:1503;dopaminergic_readCounts:381;neuron_PSI:0.893;dopaminergic_PSI:0.488	950	-	10752498	10753009	0	2	50,50	0,461
chrII	10796915	10797067	neuron_readCounts:1241;dopaminergic_readCounts:846;neuron_PSI:0.719;dopaminergic_PSI:0.34	950	-	10796915	10797067	0	2	50,50	0,102
chrII	10796924	10797067	neuron_readCounts:579;dopaminergic_readCounts:1689;neuron_PSI:0.281;dopaminergic_PSI:0.66	950	-	10796924	10797067	0	2	50,50	0,93
chrIV	7227457	7227745	neuron_readCounts:576;dopaminergic_readCounts:1622;neuron_PSI:0.177;dopaminergic_PSI:0.99	950	-	7227457	7227745	0	2	50,50	0,238
chrIV	7227567	7227745	neuron_readCounts:3881;dopaminergic_readCounts:12;neuron_PSI:0.823;dopaminergic_PSI:0.01	950	-	7227567	7227745	0	2	50,50	0,128
chrIV	7227457	7227635	neuron_readCounts:2783;dopaminergic_readCounts:9;neuron_PSI:0.634;dopaminergic_PSI:0.007	950	-	7227457	7227635	0	2	50,50	0,128
chrIV	7227457	7227601	neuron_readCounts:711;dopaminergic_readCounts:2;neuron_PSI:0.166;dopaminergic_PSI:0.001	950	-	7227457	7227601	0	2	50,50	0,94
chrX	7292426	7292893	neuron_readCounts:136;dopaminergic_readCounts:221;neuron_PSI:0.678;dopaminergic_PSI:0.98	950	+	7292426	7292893	0	2	50,50	0,417
chrX	7292426	7292610	neuron_readCounts:62;dopaminergic_readCounts:2;neuron_PSI:0.322;dopaminergic_PSI:0.02	950	+	7292426	7292610	0	2	50,50	0,134
chrI	10968670	10968822	neuron_readCounts:381;dopaminergic_readCounts:300;neuron_PSI:0.736;dopaminergic_PSI:0.362	950	-	10968670	10968822	0	2	50,50	0,102
chrI	10968676	10968822	neuron_readCounts:184;dopaminergic_readCounts:501;neuron_PSI:0.264;dopaminergic_PSI:0.638	950	-	10968676	10968822	0	2	50,50	0,96
chrIV	7350638	7351457	neuron_readCounts:601;dopaminergic_readCounts:399;neuron_PSI:0.65;dopaminergic_PSI:0.964	950	-	7350638	7351457	0	2	50,50	0,769
chrIV	7351210	7351457	neuron_readCounts:390;dopaminergic_readCounts:11;neuron_PSI:0.35;dopaminergic_PSI:0.036	950	-	7351210	7351457	0	2	50,50	0,197
chrIV	7350638	7351289	neuron_readCounts:393;dopaminergic_readCounts:10;neuron_PSI:0.344;dopaminergic_PSI:0.033	950	-	7350638	7351289	0	2	50,50	0,601
chrIII	7355084	7356091	neuron_readCounts:1098;dopaminergic_readCounts:536;neuron_PSI:0.887;dopaminergic_PSI:0.502	950	-	7355084	7356091	0	2	50,50	0,957
chrIII	7354392	7356091	neuron_readCounts:158;dopaminergic_readCounts:379;neuron_PSI:0.113;dopaminergic_PSI:0.498	950	-	7354392	7356091	0	2	50,50	0,1649
chrV	11038930	11039077	neuron_readCounts:192;dopaminergic_readCounts:168;neuron_PSI:0.901;dopaminergic_PSI:0.622	950	-	11038930	11039077	0	2	50,50	0,97
chrV	11038936	11039077	neuron_readCounts:23;dopaminergic_readCounts:119;neuron_PSI:0.099;dopaminergic_PSI:0.378	950	-	11038936	11039077	0	2	50,50	0,91
chrIII	11045465	11052864	neuron_readCounts:75;dopaminergic_readCounts:18;neuron_PSI:0.668;dopaminergic_PSI:0.24	950	+	11045465	11052864	0	2	50,50	0,7349
chrIII	11045441	11052864	neuron_readCounts:36;dopaminergic_readCounts:71;neuron_PSI:0.332;dopaminergic_PSI:0.76	950	+	11045441	11052864	0	2	50,50	0,7373
chrIV	7386789	7387175	neuron_readCounts:429;dopaminergic_readCounts:109;neuron_PSI:0.814;dopaminergic_PSI:0.269	950	-	7386789	7387175	0	2	50,50	0,336
chrIV	7386789	7388908	neuron_readCounts:99;dopaminergic_readCounts:345;neuron_PSI:0.186;dopaminergic_PSI:0.731	950	-	7386789	7388908	0	2	50,50	0,2069
chrII	11095447	11095600	neuron_readCounts:577;dopaminergic_readCounts:551;neuron_PSI:0.644;dopaminergic_PSI:0.305	950	-	11095447	11095600	0	2	50,50	0,103
chrII	11095456	11095600	neuron_readCounts:321;dopaminergic_readCounts:1233;neuron_PSI:0.356;dopaminergic_PSI:0.695	950	-	11095456	11095600	0	2	50,50	0,94
chrIV	7416906	7417544	neuron_readCounts:186;dopaminergic_readCounts:13;neuron_PSI:0.316;dopaminergic_PSI:0.033	950	+	7416906	7417544	0	2	50,50	0,588
chrIV	7416906	7417709	neuron_readCounts:401;dopaminergic_readCounts:450;neuron_PSI:0.684;dopaminergic_PSI:0.967	950	+	7416906	7417709	0	2	50,50	0,753
chrIV	7417558	7417709	neuron_readCounts:203;dopaminergic_readCounts:38;neuron_PSI:0.331;dopaminergic_PSI:0.106	950	+	7417558	7417709	0	2	50,50	0,101
chrII	11127826	11128430	neuron_readCounts:224;dopaminergic_readCounts:339;neuron_PSI:0.473;dopaminergic_PSI:0.88	950	+	11127826	11128430	0	2	50,50	0,554
chrII	11127824	11128430	neuron_readCounts:13;dopaminergic_readCounts:30;neuron_PSI:0.027;dopaminergic_PSI:0.061	950	+	11127824	11128430	0	2	50,50	0,556
chrII	11127921	11128430	neuron_readCounts:263;dopaminergic_readCounts:8;neuron_PSI:0.5;dopaminergic_PSI:0.059	950	+	11127921	11128430	0	2	50,50	0,459
chrIV	7440776	7440929	neuron_readCounts:212;dopaminergic_readCounts:3;neuron_PSI:0.616;dopaminergic_PSI:0.044	950	+	7440776	7440929	0	2	50,50	0,103
chrIV	7440776	7442083	neuron_readCounts:132;dopaminergic_readCounts:857;neuron_PSI:0.384;dopaminergic_PSI:0.956	950	+	7440776	7442083	0	2	50,50	0,1257
chrIV	7440866	7442083	neuron_readCounts:216;dopaminergic_readCounts:3;neuron_PSI:0.618;dopaminergic_PSI:0.044	950	+	7440866	7442083	0	2	50,50	0,1167
chrIV	7443061	7443247	neuron_readCounts:103;dopaminergic_readCounts:1039;neuron_PSI:0.186;dopaminergic_PSI:0.484	950	+	7443061	7443247	0	2	50,50	0,136
chrIV	7443061	7443569	neuron_readCounts:478;dopaminergic_readCounts:915;neuron_PSI:0.814;dopaminergic_PSI:0.516	950	+	7443061	7443569	0	2	50,50	0,458
chrI	11168721	11175077	neuron_readCounts:451;dopaminergic_readCounts:779;neuron_PSI:0.432;dopaminergic_PSI:0.859	950	-	11168721	11175077	0	2	50,50	0,6306
chrI	11174698	11175077	neuron_readCounts:776;dopaminergic_readCounts:70;neuron_PSI:0.568;dopaminergic_PSI:0.141	950	-	11174698	11175077	0	2	50,50	0,329
chrX	11203241	11203852	neuron_readCounts:130;dopaminergic_readCounts:147;neuron_PSI:0.777;dopaminergic_PSI:0.986	950	-	11203241	11203852	0	2	50,50	0,561
chrX	11203241	11203594	neuron_readCounts:45;dopaminergic_readCounts:2;neuron_PSI:0.223;dopaminergic_PSI:0.014	950	-	11203241	11203594	0	2	50,50	0,303
chrI	5635642	5636766	neuron_readCounts:869;dopaminergic_readCounts:94;neuron_PSI:0.572;dopaminergic_PSI:0.094	950	+	5635642	5636766	0	2	50,50	0,1074
chrI	5634185	5636766	neuron_readCounts:37;dopaminergic_readCounts:69;neuron_PSI:0.022;dopaminergic_PSI:0.109	950	+	5634185	5636766	0	2	50,50	0,2531
chrX	7600416	7600995	neuron_readCounts:726;dopaminergic_readCounts:95;neuron_PSI:0.421;dopaminergic_PSI:0.46	950	-	7600416	7600995	0	2	50,50	0,529
chrX	7600416	7601010	neuron_readCounts:335;dopaminergic_readCounts:93;neuron_PSI:0.184;dopaminergic_PSI:0.514	950	-	7600416	7601010	0	2	50,50	0,544
chrX	7600666	7600995	neuron_readCounts:671;dopaminergic_readCounts:2;neuron_PSI:0.395;dopaminergic_PSI:0.026	950	-	7600666	7600995	0	2	50,50	0,279
chrX	7600416	7600739	neuron_readCounts:764;dopaminergic_readCounts:2;neuron_PSI:0.409;dopaminergic_PSI:0.026	950	-	7600416	7600739	0	2	50,50	0,273
chrII	11474167	11474324	neuron_readCounts:158;dopaminergic_readCounts:139;neuron_PSI:0.706;dopaminergic_PSI:0.339	950	+	11474167	11474324	0	2	50,50	0,107
chrII	11474167	11474317	neuron_readCounts:87;dopaminergic_readCounts:288;neuron_PSI:0.294;dopaminergic_PSI:0.661	950	+	11474167	11474317	0	2	50,50	0,100
chrII	7683477	7684015	neuron_readCounts:307;dopaminergic_readCounts:40;neuron_PSI:0.494;dopaminergic_PSI:0.081	950	+	7683477	7684015	0	2	50,50	0,488
chrII	7683477	7683725	neuron_readCounts:308;dopaminergic_readCounts:892;neuron_PSI:0.506;dopaminergic_PSI:0.919	950	+	7683477	7683725	0	2	50,50	0,198
chrII	7683717	7684015	neuron_readCounts:390;dopaminergic_readCounts:1294;neuron_PSI:0.561;dopaminergic_PSI:0.954	950	+	7683717	7684015	0	2	50,50	0,248
chrI	7685971	7686640	neuron_readCounts:435;dopaminergic_readCounts:1307;neuron_PSI:0.369;dopaminergic_PSI:0.898	950	-	7685971	7686640	0	2	50,50	0,619
chrI	7685971	7686207	neuron_readCounts:613;dopaminergic_readCounts:59;neuron_PSI:0.631;dopaminergic_PSI:0.102	950	-	7685971	7686207	0	2	50,50	0,186
chrII	11527320	11531493	neuron_readCounts:129;dopaminergic_readCounts:353;neuron_PSI:0.072;dopaminergic_PSI:0.474	950	-	11527320	11531493	0	2	50,50	0,4123
chrII	11527312	11531493	neuron_readCounts:1360;dopaminergic_readCounts:364;neuron_PSI:0.928;dopaminergic_PSI:0.526	950	-	11527312	11531493	0	2	50,50	0,4131
chrIV	7790347	7790548	neuron_readCounts:1128;dopaminergic_readCounts:2102;neuron_PSI:0.064;dopaminergic_PSI:0.327	950	-	7790347	7790548	0	2	50,50	0,151
chrIV	7790347	7790886	neuron_readCounts:18125;dopaminergic_readCounts:3435;neuron_PSI:0.936;dopaminergic_PSI:0.673	950	-	7790347	7790886	0	2	50,50	0,489
chrX	7790598	7790806	neuron_readCounts:2748;dopaminergic_readCounts:19;neuron_PSI:0.539;dopaminergic_PSI:0.074	950	-	7790598	7790806	0	2	50,50	0,158
chrX	7790598	7792758	neuron_readCounts:1775;dopaminergic_readCounts:390;neuron_PSI:0.461;dopaminergic_PSI:0.926	950	-	7790598	7792758	0	2	50,50	0,2110
chrIV	7815261	7815628	neuron_readCounts:127;dopaminergic_readCounts:441;neuron_PSI:0.242;dopaminergic_PSI:0.862	950	-	7815261	7815628	0	2	50,50	0,317
chrIV	7815450	7815628	neuron_readCounts:481;dopaminergic_readCounts:7;neuron_PSI:0.758;dopaminergic_PSI:0.138	950	-	7815450	7815628	0	2	50,50	0,128
chrII	5864921	5866362	neuron_readCounts:113;dopaminergic_readCounts:659;neuron_PSI:0.337;dopaminergic_PSI:0.707	950	+	5864921	5866362	0	2	50,50	0,1391
chrII	5866176	5866362	neuron_readCounts:221;dopaminergic_readCounts:192;neuron_PSI:0.599;dopaminergic_PSI:0.178	950	+	5866176	5866362	0	2	50,50	0,136
chrII	5865463	5866362	neuron_readCounts:22;dopaminergic_readCounts:116;neuron_PSI:0.064;dopaminergic_PSI:0.114	950	+	5865463	5866362	0	2	50,50	0,849
chrI	7829884	7832429	neuron_readCounts:66;dopaminergic_readCounts:75;neuron_PSI:0.322;dopaminergic_PSI:0.933	950	-	7829884	7832429	0	2	50,50	0,2495
chrI	7829884	7830931	neuron_readCounts:29;dopaminergic_readCounts:2;neuron_PSI:0.142;dopaminergic_PSI:0.033	950	-	7829884	7830931	0	2	50,50	0,997
chrI	7829884	7831466	neuron_readCounts:107;dopaminergic_readCounts:2;neuron_PSI:0.536;dopaminergic_PSI:0.033	950	-	7829884	7831466	0	2	50,50	0,1532
chrII	5888489	5890536	neuron_readCounts:3;dopaminergic_readCounts:14;neuron_PSI:0.006;dopaminergic_PSI:0.12	950	+	5888489	5890536	0	2	50,50	0,1997
chrII	5886446	5890536	neuron_readCounts:48;dopaminergic_readCounts:60;neuron_PSI:0.093;dopaminergic_PSI:0.404	950	+	5886446	5890536	0	2	50,50	0,4040
chrII	5884613	5890536	neuron_readCounts:284;dopaminergic_readCounts:63;neuron_PSI:0.585;dopaminergic_PSI:0.453	950	+	5884613	5890536	0	2	50,50	0,5873
chrII	5889657	5890536	neuron_readCounts:155;dopaminergic_readCounts:3;neuron_PSI:0.316;dopaminergic_PSI:0.023	950	+	5889657	5890536	0	2	50,50	0,829
chrIII	5889824	5891373	neuron_readCounts:447;dopaminergic_readCounts:463;neuron_PSI:0.321;dopaminergic_PSI:0.664	950	-	5889824	5891373	0	2	50,50	0,1499
chrIII	5891218	5891373	neuron_readCounts:687;dopaminergic_readCounts:26;neuron_PSI:0.521;dopaminergic_PSI:0.032	950	-	5891218	5891373	0	2	50,50	0,105
chrIII	5890627	5891373	neuron_readCounts:199;dopaminergic_readCounts:211;neuron_PSI:0.158;dopaminergic_PSI:0.305	950	-	5890627	5891373	0	2	50,50	0,696
chrIV	7891440	7891648	neuron_readCounts:302;dopaminergic_readCounts:13;neuron_PSI:0.528;dopaminergic_PSI:0.076	950	+	7891440	7891648	0	2	50,50	0,158
chrIV	7886826	7891648	neuron_readCounts:334;dopaminergic_readCounts:332;neuron_PSI:0.472;dopaminergic_PSI:0.924	950	+	7886826	7891648	0	2	50,50	0,4772
chrV	11850831	11851681	neuron_readCounts:1106;dopaminergic_readCounts:656;neuron_PSI:0.867;dopaminergic_PSI:0.516	950	+	11850831	11851681	0	2	50,50	0,800
chrV	11850831	11851672	neuron_readCounts:227;dopaminergic_readCounts:689;neuron_PSI:0.133;dopaminergic_PSI:0.484	950	+	11850831	11851672	0	2	50,50	0,791
chrIV	11856173	11856316	neuron_readCounts:56;dopaminergic_readCounts:334;neuron_PSI:0.169;dopaminergic_PSI:0.475	950	-	11856173	11856316	0	2	50,50	0,93
chrIV	11856166	11856316	neuron_readCounts:274;dopaminergic_readCounts:206;neuron_PSI:0.831;dopaminergic_PSI:0.525	950	-	11856166	11856316	0	2	50,50	0,100
chrIV	7905878	7906084	neuron_readCounts:263;dopaminergic_readCounts:1188;neuron_PSI:0.367;dopaminergic_PSI:0.809	950	+	7905878	7906084	0	2	50,50	0,156
chrIV	7905878	7906832	neuron_readCounts:435;dopaminergic_readCounts:213;neuron_PSI:0.633;dopaminergic_PSI:0.191	950	+	7905878	7906832	0	2	50,50	0,904
chrIV	7906146	7906832	neuron_readCounts:345;dopaminergic_readCounts:1289;neuron_PSI:0.415;dopaminergic_PSI:0.818	950	+	7906146	7906832	0	2	50,50	0,636
chrX	11967356	11969704	neuron_readCounts:153;dopaminergic_readCounts:105;neuron_PSI:0.397;dopaminergic_PSI:0.942	950	+	11967356	11969704	0	2	50,50	0,2298
chrX	11969465	11969704	neuron_readCounts:297;dopaminergic_readCounts:4;neuron_PSI:0.603;dopaminergic_PSI:0.058	950	+	11969465	11969704	0	2	50,50	0,189
chrII	8024547	8025242	neuron_readCounts:174;dopaminergic_readCounts:19;neuron_PSI:0.581;dopaminergic_PSI:0.136	950	-	8024547	8025242	0	2	50,50	0,645
chrII	8025054	8025242	neuron_readCounts:152;dopaminergic_readCounts:360;neuron_PSI:0.419;dopaminergic_PSI:0.864	950	-	8025054	8025242	0	2	50,50	0,138
chrV	12093366	12093512	neuron_readCounts:46;dopaminergic_readCounts:146;neuron_PSI:0.702;dopaminergic_PSI:0.954	950	+	12093366	12093512	0	2	50,50	0,96
chrV	12093366	12093561	neuron_readCounts:20;dopaminergic_readCounts:8;neuron_PSI:0.298;dopaminergic_PSI:0.046	950	+	12093366	12093561	0	2	50,50	0,145
chrII	12148093	12148533	neuron_readCounts:159;dopaminergic_readCounts:386;neuron_PSI:0.76;dopaminergic_PSI:0.414	950	+	12148093	12148533	0	2	50,50	0,390
chrII	12148070	12148533	neuron_readCounts:18;dopaminergic_readCounts:80;neuron_PSI:0.089;dopaminergic_PSI:0.086	950	+	12148070	12148533	0	2	50,50	0,413
chrII	12148093	12148526	neuron_readCounts:32;dopaminergic_readCounts:317;neuron_PSI:0.151;dopaminergic_PSI:0.499	950	+	12148093	12148526	0	2	50,50	0,383
chrI	12207606	12208491	neuron_readCounts:99;dopaminergic_readCounts:322;neuron_PSI:0.435;dopaminergic_PSI:0.944	950	+	12207606	12208491	0	2	50,50	0,835
chrI	12207585	12208491	neuron_readCounts:128;dopaminergic_readCounts:28;neuron_PSI:0.565;dopaminergic_PSI:0.056	950	+	12207585	12208491	0	2	50,50	0,856
chrIV	8178631	8185674	neuron_readCounts:364;dopaminergic_readCounts:181;neuron_PSI:0.309;dopaminergic_PSI:0.845	950	+	8178631	8185674	0	2	50,50	0,6993
chrIV	8185335	8185674	neuron_readCounts:823;dopaminergic_readCounts:15;neuron_PSI:0.691;dopaminergic_PSI:0.155	950	+	8185335	8185674	0	2	50,50	0,289
chrIV	12431259	12431653	neuron_readCounts:81;dopaminergic_readCounts:352;neuron_PSI:0.37;dopaminergic_PSI:0.779	950	+	12431259	12431653	0	2	50,50	0,344
chrIV	12431131	12431653	neuron_readCounts:121;dopaminergic_readCounts:72;neuron_PSI:0.63;dopaminergic_PSI:0.221	950	+	12431131	12431653	0	2	50,50	0,472
chrX	8290277	8290761	neuron_readCounts:72;dopaminergic_readCounts:17;neuron_PSI:0.94;dopaminergic_PSI:0.363	950	+	8290277	8290761	0	2	50,50	0,434
chrX	8290424	8290761	neuron_readCounts:5;dopaminergic_readCounts:38;neuron_PSI:0.06;dopaminergic_PSI:0.637	950	+	8290424	8290761	0	2	50,50	0,287
chrII	8307395	8309775	neuron_readCounts:144;dopaminergic_readCounts:72;neuron_PSI:0.113;dopaminergic_PSI:0.421	950	-	8307395	8309775	0	2	50,50	0,2330
chrII	8309410	8309775	neuron_readCounts:1017;dopaminergic_readCounts:93;neuron_PSI:0.887;dopaminergic_PSI:0.579	950	-	8309410	8309775	0	2	50,50	0,315
chrX	12506916	12507120	neuron_readCounts:268;dopaminergic_readCounts:5;neuron_PSI:0.727;dopaminergic_PSI:0.031	950	-	12506916	12507120	0	2	50,50	0,154
chrX	12506964	12507120	neuron_readCounts:106;dopaminergic_readCounts:412;neuron_PSI:0.273;dopaminergic_PSI:0.969	950	-	12506964	12507120	0	2	50,50	0,106
chrI	12567326	12568255	neuron_readCounts:1755;dopaminergic_readCounts:114;neuron_PSI:0.725;dopaminergic_PSI:0.141	950	-	12567326	12568255	0	2	50,50	0,879
chrI	12567326	12568234	neuron_readCounts:661;dopaminergic_readCounts:638;neuron_PSI:0.275;dopaminergic_PSI:0.859	950	-	12567326	12568234	0	2	50,50	0,858
chrV	8470402	8471013	neuron_readCounts:1725;dopaminergic_readCounts:146;neuron_PSI:0.973;dopaminergic_PSI:0.727	950	-	8470402	8471013	0	2	50,50	0,561
chrV	8470402	8471165	neuron_readCounts:40;dopaminergic_readCounts:52;neuron_PSI:0.027;dopaminergic_PSI:0.273	950	-	8470402	8471165	0	2	50,50	0,713
chrIII	8486691	8487456	neuron_readCounts:366;dopaminergic_readCounts:561;neuron_PSI:0.443;dopaminergic_PSI:0.885	950	+	8486691	8487456	0	2	50,50	0,715
chrIII	8486691	8487749	neuron_readCounts:449;dopaminergic_readCounts:60;neuron_PSI:0.557;dopaminergic_PSI:0.115	950	+	8486691	8487749	0	2	50,50	0,1008
chrIII	8487470	8487797	neuron_readCounts:90;dopaminergic_readCounts:180;neuron_PSI:0.11;dopaminergic_PSI:0.21	950	+	8487470	8487797	0	2	50,50	0,277
chrIII	8487470	8487749	neuron_readCounts:284;dopaminergic_readCounts:358;neuron_PSI:0.343;dopaminergic_PSI:0.67	950	+	8487470	8487749	0	2	50,50	0,229
chrII	12836943	12837415	neuron_readCounts:75;dopaminergic_readCounts:21;neuron_PSI:0.076;dopaminergic_PSI:0.327	950	-	12836943	12837415	0	2	50,50	0,422
chrII	12836937	12837415	neuron_readCounts:815;dopaminergic_readCounts:43;neuron_PSI:0.924;dopaminergic_PSI:0.673	950	-	12836937	12837415	0	2	50,50	0,428
chrI	8577124	8580052	neuron_readCounts:79;dopaminergic_readCounts:8;neuron_PSI:0.715;dopaminergic_PSI:0.186	950	-	8577124	8580052	0	2	50,50	0,2878
chrI	8578853	8580052	neuron_readCounts:40;dopaminergic_readCounts:56;neuron_PSI:0.285;dopaminergic_PSI:0.814	950	-	8578853	8580052	0	2	50,50	0,1149
chrIV	8609871	8610388	neuron_readCounts:502;dopaminergic_readCounts:47;neuron_PSI:0.233;dopaminergic_PSI:0.012	950	+	8609871	8610388	0	2	50,50	0,467
chrIV	8609871	8610433	neuron_readCounts:674;dopaminergic_readCounts:2;neuron_PSI:0.295;dopaminergic_PSI:0.001	950	+	8609871	8610433	0	2	50,50	0,512
chrIV	8609871	8611425	neuron_readCounts:801;dopaminergic_readCounts:4008;neuron_PSI:0.472;dopaminergic_PSI:0.987	950	+	8609871	8611425	0	2	50,50	0,1504
chrIV	8610399	8611425	neuron_readCounts:1485;dopaminergic_readCounts:31;neuron_PSI:0.564;dopaminergic_PSI:0.01	950	+	8610399	8611425	0	2	50,50	0,976
chrI	8707509	8708278	neuron_readCounts:142;dopaminergic_readCounts:106;neuron_PSI:0.048;dopaminergic_PSI:0.766	950	-	8707509	8708278	0	2	50,50	0,719
chrI	8708082	8708278	neuron_readCounts:3214;dopaminergic_readCounts:42;neuron_PSI:0.952;dopaminergic_PSI:0.234	950	-	8708082	8708278	0	2	50,50	0,146
chrI	8707509	8708134	neuron_readCounts:2462;dopaminergic_readCounts:33;neuron_PSI:0.632;dopaminergic_PSI:0.157	950	-	8707509	8708134	0	2	50,50	0,575
chrI	8707509	8707846	neuron_readCounts:1250;dopaminergic_readCounts:43;neuron_PSI:0.326;dopaminergic_PSI:0.234	950	-	8707509	8707846	0	2	50,50	0,287
chrIV	13097779	13097923	neuron_readCounts:400;dopaminergic_readCounts:648;neuron_PSI:0.129;dopaminergic_PSI:0.438	950	-	13097779	13097923	0	2	50,50	0,94
chrIV	13097773	13097923	neuron_readCounts:2652;dopaminergic_readCounts:1139;neuron_PSI:0.871;dopaminergic_PSI:0.562	950	-	13097773	13097923	0	2	50,50	0,100
chrI	8754781	8755303	neuron_readCounts:1409;dopaminergic_readCounts:623;neuron_PSI:0.595;dopaminergic_PSI:0.273	950	+	8754781	8755303	0	2	50,50	0,472
chrI	8754745	8755303	neuron_readCounts:433;dopaminergic_readCounts:1323;neuron_PSI:0.222;dopaminergic_PSI:0.663	950	+	8754745	8755303	0	2	50,50	0,508
chrI	8754781	8755013	neuron_readCounts:454;dopaminergic_readCounts:128;neuron_PSI:0.182;dopaminergic_PSI:0.064	950	+	8754781	8755013	0	2	50,50	0,182
chrI	8754943	8755303	neuron_readCounts:504;dopaminergic_readCounts:96;neuron_PSI:0.201;dopaminergic_PSI:0.058	950	+	8754943	8755303	0	2	50,50	0,310
chrV	8788628	8789511	neuron_readCounts:306;dopaminergic_readCounts:26;neuron_PSI:0.769;dopaminergic_PSI:0.126	950	+	8788628	8789511	0	2	50,50	0,833
chrV	8788628	8789064	neuron_readCounts:90;dopaminergic_readCounts:216;neuron_PSI:0.231;dopaminergic_PSI:0.874	950	+	8788628	8789064	0	2	50,50	0,386
chrI	8817199	8817370	neuron_readCounts:42;dopaminergic_readCounts:5;neuron_PSI:0.304;dopaminergic_PSI:0.066	950	+	8817199	8817370	0	2	50,50	0,121
chrI	8817199	8817657	neuron_readCounts:101;dopaminergic_readCounts:153;neuron_PSI:0.696;dopaminergic_PSI:0.934	950	+	8817199	8817657	0	2	50,50	0,408
chrI	8820327	8820663	neuron_readCounts:164;dopaminergic_readCounts:25;neuron_PSI:0.282;dopaminergic_PSI:0.045	950	+	8820327	8820663	0	2	50,50	0,286
chrI	8820327	8820493	neuron_readCounts:436;dopaminergic_readCounts:952;neuron_PSI:0.718;dopaminergic_PSI:0.955	950	+	8820327	8820493	0	2	50,50	0,116
chrI	8854594	8855167	neuron_readCounts:667;dopaminergic_readCounts:55;neuron_PSI:0.684;dopaminergic_PSI:0.449	950	-	8854594	8855167	0	2	50,50	0,523
chrI	8854594	8860413	neuron_readCounts:262;dopaminergic_readCounts:83;neuron_PSI:0.316;dopaminergic_PSI:0.551	950	-	8854594	8860413	0	2	50,50	0,5769
chrII	8899934	8903656	neuron_readCounts:21;dopaminergic_readCounts:81;neuron_PSI:0.244;dopaminergic_PSI:0.97	950	+	8899934	8903656	0	2	50,50	0,3672
chrII	8899934	8903437	neuron_readCounts:60;dopaminergic_readCounts:2;neuron_PSI:0.756;dopaminergic_PSI:0.03	950	+	8899934	8903437	0	2	50,50	0,3453
chrIII	8909061	8910130	neuron_readCounts:486;dopaminergic_readCounts:1509;neuron_PSI:0.118;dopaminergic_PSI:0.782	950	+	8909061	8910130	0	2	50,50	0,1019
chrIII	8909061	8909282	neuron_readCounts:4909;dopaminergic_readCounts:353;neuron_PSI:0.882;dopaminergic_PSI:0.218	950	+	8909061	8909282	0	2	50,50	0,171
chrIII	8909305	8910383	neuron_readCounts:10708;dopaminergic_readCounts:1443;neuron_PSI:0.903;dopaminergic_PSI:0.373	950	+	8909305	8910383	0	2	50,50	0,1028
chrIII	8910171	8910383	neuron_readCounts:909;dopaminergic_readCounts:2631;neuron_PSI:0.097;dopaminergic_PSI:0.627	950	+	8910171	8910383	0	2	50,50	0,162
chrV	8925395	8925790	neuron_readCounts:58;dopaminergic_readCounts:13;neuron_PSI:0.414;dopaminergic_PSI:0.061	950	-	8925395	8925790	0	2	50,50	0,345
chrV	8925222	8925790	neuron_readCounts:67;dopaminergic_readCounts:151;neuron_PSI:0.586;dopaminergic_PSI:0.939	950	-	8925222	8925790	0	2	50,50	0,518
chrV	8925222	8925471	neuron_readCounts:59;dopaminergic_readCounts:13;neuron_PSI:0.416;dopaminergic_PSI:0.061	950	-	8925222	8925471	0	2	50,50	0,199
chrX	8998106	8998648	neuron_readCounts:1888;dopaminergic_readCounts:1072;neuron_PSI:0.029;dopaminergic_PSI:0.25	950	+	8998106	8998648	0	2	50,50	0,492
chrX	8998230	8998648	neuron_readCounts:60911;dopaminergic_readCounts:3258;neuron_PSI:0.971;dopaminergic_PSI:0.75	950	+	8998230	8998648	0	2	50,50	0,368
chrIV	9044098	9044743	neuron_readCounts:205;dopaminergic_readCounts:519;neuron_PSI:0.809;dopaminergic_PSI:0.985	950	-	9044098	9044743	0	2	50,50	0,595
chrIV	9044098	9044245	neuron_readCounts:57;dopaminergic_readCounts:6;neuron_PSI:0.191;dopaminergic_PSI:0.015	950	-	9044098	9044245	0	2	50,50	0,97
chrI	9101183	9101887	neuron_readCounts:2950;dopaminergic_readCounts:612;neuron_PSI:0.797;dopaminergic_PSI:0.244	950	-	9101183	9101887	0	2	50,50	0,654
chrI	9101622	9101887	neuron_readCounts:818;dopaminergic_readCounts:1926;neuron_PSI:0.203;dopaminergic_PSI:0.756	950	-	9101622	9101887	0	2	50,50	0,215
chrII	9113352	9116874	neuron_readCounts:482;dopaminergic_readCounts:37;neuron_PSI:0.917;dopaminergic_PSI:0.155	950	+	9113352	9116874	0	2	50,50	0,3472
chrII	9116677	9116874	neuron_readCounts:39;dopaminergic_readCounts:132;neuron_PSI:0.083;dopaminergic_PSI:0.845	950	+	9116677	9116874	0	2	50,50	0,147
chrIII	13702196	13714621	neuron_readCounts:72;dopaminergic_readCounts:78;neuron_PSI:0.64;dopaminergic_PSI:0.917	950	+	13702196	13714621	0	2	50,50	0,12375
chrIII	13702196	13707162	neuron_readCounts:47;dopaminergic_readCounts:4;neuron_PSI:0.36;dopaminergic_PSI:0.083	950	+	13702196	13707162	0	2	50,50	0,4916
chrI	9154412	9154640	neuron_readCounts:260;dopaminergic_readCounts:168;neuron_PSI:0.615;dopaminergic_PSI:0.334	950	-	9154412	9154640	0	2	50,50	0,178
chrI	9154412	9154902	neuron_readCounts:58;dopaminergic_readCounts:236;neuron_PSI:0.385;dopaminergic_PSI:0.666	950	-	9154412	9154902	0	2	50,50	0,440
chrI	9195074	9198858	neuron_readCounts:379;dopaminergic_readCounts:73;neuron_PSI:0.715;dopaminergic_PSI:0.463	950	-	9195074	9198858	0	2	50,50	0,3734
chrI	9195074	9205636	neuron_readCounts:150;dopaminergic_readCounts:102;neuron_PSI:0.285;dopaminergic_PSI:0.537	950	-	9195074	9205636	0	2	50,50	0,10512
chrV	9205151	9205692	neuron_readCounts:112;dopaminergic_readCounts:239;neuron_PSI:0.366;dopaminergic_PSI:0.873	950	-	9205151	9205692	0	2	50,50	0,491
chrV	9205417	9205692	neuron_readCounts:346;dopaminergic_readCounts:60;neuron_PSI:0.634;dopaminergic_PSI:0.127	950	-	9205417	9205692	0	2	50,50	0,225
chrV	9205151	9205452	neuron_readCounts:373;dopaminergic_readCounts:27;neuron_PSI:0.64;dopaminergic_PSI:0.07	950	-	9205151	9205452	0	2	50,50	0,251
chrIII	6938495	6938958	neuron_readCounts:304;dopaminergic_readCounts:550;neuron_PSI:0.332;dopaminergic_PSI:0.581	950	+	6938495	6938958	0	2	50,50	0,413
chrIII	6937683	6938958	neuron_readCounts:473;dopaminergic_readCounts:225;neuron_PSI:0.475;dopaminergic_PSI:0.254	950	+	6937683	6938958	0	2	50,50	0,1225
chrIII	6937424	6938958	neuron_readCounts:176;dopaminergic_readCounts:131;neuron_PSI:0.192;dopaminergic_PSI:0.164	950	+	6937424	6938958	0	2	50,50	0,1484
chrX	9253574	9254195	neuron_readCounts:78;dopaminergic_readCounts:832;neuron_PSI:0.673;dopaminergic_PSI:0.956	950	+	9253574	9254195	0	2	50,50	0,571
chrX	9253574	9253758	neuron_readCounts:39;dopaminergic_readCounts:32;neuron_PSI:0.327;dopaminergic_PSI:0.044	950	+	9253574	9253758	0	2	50,50	0,134
chrII	9259567	9259720	neuron_readCounts:9616;dopaminergic_readCounts:1305;neuron_PSI:0.685;dopaminergic_PSI:0.319	950	-	9259567	9259720	0	2	50,50	0,103
chrII	9259334	9259720	neuron_readCounts:2943;dopaminergic_readCounts:2139;neuron_PSI:0.315;dopaminergic_PSI:0.681	950	-	9259334	9259720	0	2	50,50	0,336
chrII	9259334	9259639	neuron_readCounts:10478;dopaminergic_readCounts:1654;neuron_PSI:0.719;dopaminergic_PSI:0.433	950	-	9259334	9259639	0	2	50,50	0,255
chrI	9273518	9278567	neuron_readCounts:391;dopaminergic_readCounts:128;neuron_PSI:0.734;dopaminergic_PSI:0.114	950	-	9273518	9278567	0	2	50,50	0,4999
chrI	9273518	9273716	neuron_readCounts:152;dopaminergic_readCounts:545;neuron_PSI:0.266;dopaminergic_PSI:0.886	950	-	9273518	9273716	0	2	50,50	0,148
chrV	13962677	13962826	neuron_readCounts:294;dopaminergic_readCounts:616;neuron_PSI:0.682;dopaminergic_PSI:0.33	950	+	13962677	13962826	0	2	50,50	0,99
chrV	13962677	13962820	neuron_readCounts:145;dopaminergic_readCounts:1300;neuron_PSI:0.318;dopaminergic_PSI:0.67	950	+	13962677	13962820	0	2	50,50	0,93
chrII	14011295	14012444	neuron_readCounts:35;dopaminergic_readCounts:78;neuron_PSI:0.1;dopaminergic_PSI:0.228	950	+	14011295	14012444	0	2	50,50	0,1099
chrII	14011561	14012444	neuron_readCounts:174;dopaminergic_readCounts:20;neuron_PSI:0.498;dopaminergic_PSI:0.016	950	+	14011561	14012444	0	2	50,50	0,833
chrII	14010742	14012444	neuron_readCounts:141;dopaminergic_readCounts:888;neuron_PSI:0.402;dopaminergic_PSI:0.756	950	+	14010742	14012444	0	2	50,50	0,1652
chrII	9365729	9366022	neuron_readCounts:240;dopaminergic_readCounts:733;neuron_PSI:0.204;dopaminergic_PSI:0.877	950	+	9365729	9366022	0	2	50,50	0,243
chrII	9365729	9367518	neuron_readCounts:894;dopaminergic_readCounts:109;neuron_PSI:0.796;dopaminergic_PSI:0.123	950	+	9365729	9367518	0	2	50,50	0,1739
chrX	9383041	9383515	neuron_readCounts:1724;dopaminergic_readCounts:960;neuron_PSI:0.327;dopaminergic_PSI:0.938	950	+	9383041	9383515	0	2	50,50	0,424
chrX	9383041	9385623	neuron_readCounts:4151;dopaminergic_readCounts:50;neuron_PSI:0.673;dopaminergic_PSI:0.062	950	+	9383041	9385623	0	2	50,50	0,2532
chrV	9396630	9396796	neuron_readCounts:133;dopaminergic_readCounts:9;neuron_PSI:0.383;dopaminergic_PSI:0.044	950	+	9396630	9396796	0	2	50,50	0,116
chrV	9394160	9396796	neuron_readCounts:216;dopaminergic_readCounts:4839;neuron_PSI:0.617;dopaminergic_PSI:0.956	950	+	9394160	9396796	0	2	50,50	0,2586
chrIII	9460173	9461115	neuron_readCounts:568;dopaminergic_readCounts:1510;neuron_PSI:0.464;dopaminergic_PSI:0.956	950	+	9460173	9461115	0	2	50,50	0,892
chrIII	9460173	9460567	neuron_readCounts:641;dopaminergic_readCounts:87;neuron_PSI:0.536;dopaminergic_PSI:0.044	950	+	9460173	9460567	0	2	50,50	0,344
chrIII	9460644	9461115	neuron_readCounts:724;dopaminergic_readCounts:117;neuron_PSI:0.562;dopaminergic_PSI:0.14	950	+	9460644	9461115	0	2	50,50	0,421
chrIII	9497271	9498498	neuron_readCounts:106;dopaminergic_readCounts:192;neuron_PSI:0.055;dopaminergic_PSI:0.37	950	-	9497271	9498498	0	2	50,50	0,1177
chrIII	9498320	9498498	neuron_readCounts:7521;dopaminergic_readCounts:281;neuron_PSI:0.945;dopaminergic_PSI:0.63	950	-	9498320	9498498	0	2	50,50	0,128
chrIII	9548771	9549221	neuron_readCounts:30;dopaminergic_readCounts:162;neuron_PSI:0.102;dopaminergic_PSI:0.402	950	+	9548771	9549221	0	2	50,50	0,400
chrIII	9548637	9549221	neuron_readCounts:251;dopaminergic_readCounts:222;neuron_PSI:0.898;dopaminergic_PSI:0.598	950	+	9548637	9549221	0	2	50,50	0,534
chrIII	9550333	9550770	neuron_readCounts:178;dopaminergic_readCounts:9;neuron_PSI:0.504;dopaminergic_PSI:0.029	950	+	9550333	9550770	0	2	50,50	0,387
chrIII	9550185	9550770	neuron_readCounts:184;dopaminergic_readCounts:474;neuron_PSI:0.496;dopaminergic_PSI:0.971	950	+	9550185	9550770	0	2	50,50	0,535
chrIII	9551502	9552623	neuron_readCounts:3;dopaminergic_readCounts:40;neuron_PSI:0.005;dopaminergic_PSI:0.04	950	+	9551502	9552623	0	2	50,50	0,1071
chrIII	9551502	9551677	neuron_readCounts:119;dopaminergic_readCounts:536;neuron_PSI:0.215;dopaminergic_PSI:0.72	950	+	9551502	9551677	0	2	50,50	0,125
chrIII	9551502	9552631	neuron_readCounts:439;dopaminergic_readCounts:221;neuron_PSI:0.779;dopaminergic_PSI:0.24	950	+	9551502	9552631	0	2	50,50	0,1079
chrV	9553791	9553984	neuron_readCounts:403;dopaminergic_readCounts:1037;neuron_PSI:0.206;dopaminergic_PSI:0.882	950	+	9553791	9553984	0	2	50,50	0,143
chrIII	9553673	9554492	neuron_readCounts:167;dopaminergic_readCounts:330;neuron_PSI:0.179;dopaminergic_PSI:0.735	950	+	9553673	9554492	0	2	50,50	0,769
chrIII	9553673	9554147	neuron_readCounts:768;dopaminergic_readCounts:74;neuron_PSI:0.821;dopaminergic_PSI:0.265	950	+	9553673	9554147	0	2	50,50	0,424
chrIII	9554131	9554492	neuron_readCounts:809;dopaminergic_readCounts:76;neuron_PSI:0.829;dopaminergic_PSI:0.298	950	+	9554131	9554492	0	2	50,50	0,311
chrV	9553946	9554902	neuron_readCounts:1178;dopaminergic_readCounts:70;neuron_PSI:0.576;dopaminergic_PSI:0.058	950	+	9553946	9554902	0	2	50,50	0,906
chrV	9553946	9554668	neuron_readCounts:905;dopaminergic_readCounts:1436;neuron_PSI:0.424;dopaminergic_PSI:0.942	950	+	9553946	9554668	0	2	50,50	0,672
chrV	9554688	9554902	neuron_readCounts:951;dopaminergic_readCounts:1425;neuron_PSI:0.437;dopaminergic_PSI:0.945	950	+	9554688	9554902	0	2	50,50	0,164
chrX	9614048	9614570	neuron_readCounts:232;dopaminergic_readCounts:86;neuron_PSI:0.726;dopaminergic_PSI:0.943	950	+	9614048	9614570	0	2	50,50	0,472
chrX	9614048	9614811	neuron_readCounts:86;dopaminergic_readCounts:4;neuron_PSI:0.274;dopaminergic_PSI:0.057	950	+	9614048	9614811	0	2	50,50	0,713
chrI	14474881	14476400	neuron_readCounts:1196;dopaminergic_readCounts:375;neuron_PSI:0.823;dopaminergic_PSI:0.301	950	+	14474881	14476400	0	2	50,50	0,1469
chrI	14474881	14476394	neuron_readCounts:309;dopaminergic_readCounts:933;neuron_PSI:0.177;dopaminergic_PSI:0.699	950	+	14474881	14476394	0	2	50,50	0,1463
chrI	14497994	14498144	neuron_readCounts:180;dopaminergic_readCounts:73;neuron_PSI:0.753;dopaminergic_PSI:0.263	950	-	14497994	14498144	0	2	50,50	0,100
chrI	14497976	14498144	neuron_readCounts:21;dopaminergic_readCounts:52;neuron_PSI:0.097;dopaminergic_PSI:0.175	950	-	14497976	14498144	0	2	50,50	0,118
chrI	14498002	14498144	neuron_readCounts:39;dopaminergic_readCounts:162;neuron_PSI:0.15;dopaminergic_PSI:0.562	950	-	14498002	14498144	0	2	50,50	0,92
chrV	9691781	9692076	neuron_readCounts:12;dopaminergic_readCounts:60;neuron_PSI:0.04;dopaminergic_PSI:0.251	950	-	9691781	9692076	0	2	50,50	0,245
chrV	9691927	9692076	neuron_readCounts:281;dopaminergic_readCounts:169;neuron_PSI:0.96;dopaminergic_PSI:0.749	950	-	9691927	9692076	0	2	50,50	0,99
chrIV	14657140	14657307	neuron_readCounts:700;dopaminergic_readCounts:356;neuron_PSI:0.606;dopaminergic_PSI:0.238	950	+	14657140	14657307	0	2	50,50	0,117
chrIV	14657140	14657295	neuron_readCounts:457;dopaminergic_readCounts:1095;neuron_PSI:0.394;dopaminergic_PSI:0.762	950	+	14657140	14657295	0	2	50,50	0,105
chrIV	9858876	9860155	neuron_readCounts:82;dopaminergic_readCounts:145;neuron_PSI:0.686;dopaminergic_PSI:0.974	950	+	9858876	9860155	0	2	50,50	0,1229
chrIV	9858876	9859647	neuron_readCounts:31;dopaminergic_readCounts:2;neuron_PSI:0.314;dopaminergic_PSI:0.026	950	+	9858876	9859647	0	2	50,50	0,721
chrIV	9859817	9860155	neuron_readCounts:59;dopaminergic_readCounts:23;neuron_PSI:0.449;dopaminergic_PSI:0.098	950	+	9859817	9860155	0	2	50,50	0,288
chrX	9866722	9867177	neuron_readCounts:90;dopaminergic_readCounts:75;neuron_PSI:0.761;dopaminergic_PSI:0.464	950	+	9866722	9867177	0	2	50,50	0,405
chrX	9866722	9867030	neuron_readCounts:26;dopaminergic_readCounts:113;neuron_PSI:0.239;dopaminergic_PSI:0.536	950	+	9866722	9867030	0	2	50,50	0,258
chrX	9867026	9867177	neuron_readCounts:32;dopaminergic_readCounts:167;neuron_PSI:0.276;dopaminergic_PSI:0.537	950	+	9867026	9867177	0	2	50,50	0,101
chrX	9867476	9867827	neuron_readCounts:135;dopaminergic_readCounts:84;neuron_PSI:0.663;dopaminergic_PSI:0.401	950	+	9867476	9867827	0	2	50,50	0,301
chrX	9867476	9869162	neuron_readCounts:66;dopaminergic_readCounts:300;neuron_PSI:0.337;dopaminergic_PSI:0.599	950	+	9867476	9869162	0	2	50,50	0,1636
chrIV	9922645	9922985	neuron_readCounts:106;dopaminergic_readCounts:842;neuron_PSI:0.741;dopaminergic_PSI:0.932	950	-	9922645	9922985	0	2	50,50	0,290
chrIV	9922476	9922985	neuron_readCounts:45;dopaminergic_readCounts:14;neuron_PSI:0.259;dopaminergic_PSI:0.068	950	-	9922476	9922985	0	2	50,50	0,459
chrIV	9936513	9937086	neuron_readCounts:80;dopaminergic_readCounts:289;neuron_PSI:0.707;dopaminergic_PSI:0.927	950	-	9936513	9937086	0	2	50,50	0,523
chrIV	9936513	9936727	neuron_readCounts:40;dopaminergic_readCounts:5;neuron_PSI:0.293;dopaminergic_PSI:0.073	950	-	9936513	9936727	0	2	50,50	0,164
chrX	9992104	9993006	neuron_readCounts:1511;dopaminergic_readCounts:851;neuron_PSI:0.637;dopaminergic_PSI:0.97	950	-	9992104	9993006	0	2	50,50	0,852
chrX	9992104	9993680	neuron_readCounts:846;dopaminergic_readCounts:5;neuron_PSI:0.363;dopaminergic_PSI:0.03	950	-	9992104	9993680	0	2	50,50	0,1526
chrII	9993916	9994325	neuron_readCounts:512;dopaminergic_readCounts:55;neuron_PSI:0.329;dopaminergic_PSI:0.053	950	+	9993916	9994325	0	2	50,50	0,359
chrII	9991379	9994325	neuron_readCounts:1035;dopaminergic_readCounts:611;neuron_PSI:0.671;dopaminergic_PSI:0.947	950	+	9991379	9994325	0	2	50,50	0,2896
chrII	9998531	9998743	neuron_readCounts:7417;dopaminergic_readCounts:2036;neuron_PSI:0.909;dopaminergic_PSI:0.635	950	+	9998531	9998743	0	2	50,50	0,162
chrII	9998531	9999251	neuron_readCounts:669;dopaminergic_readCounts:1072;neuron_PSI:0.091;dopaminergic_PSI:0.365	950	+	9998531	9999251	0	2	50,50	0,670
chrI	10051973	10052254	neuron_readCounts:1074;dopaminergic_readCounts:1120;neuron_PSI:0.876;dopaminergic_PSI:0.656	950	-	10051973	10052254	0	2	50,50	0,231
chrI	10051554	10052254	neuron_readCounts:125;dopaminergic_readCounts:636;neuron_PSI:0.124;dopaminergic_PSI:0.344	950	-	10051554	10052254	0	2	50,50	0,650
chrV	15081571	15081796	neuron_readCounts:106;dopaminergic_readCounts:506;neuron_PSI:0.332;dopaminergic_PSI:0.662	950	-	15081571	15081796	0	2	50,50	0,175
chrV	15081571	15081791	neuron_readCounts:216;dopaminergic_readCounts:221;neuron_PSI:0.668;dopaminergic_PSI:0.338	950	-	15081571	15081791	0	2	50,50	0,170
chrI	10093727	10100713	neuron_readCounts:143;dopaminergic_readCounts:341;neuron_PSI:0.325;dopaminergic_PSI:0.683	950	-	10093727	10100713	0	2	50,50	0,6936
chrI	10093733	10100713	neuron_readCounts:24;dopaminergic_readCounts:146;neuron_PSI:0.055;dopaminergic_PSI:0.213	950	-	10093733	10100713	0	2	50,50	0,6930
chrI	10093727	10093914	neuron_readCounts:273;dopaminergic_readCounts:50;neuron_PSI:0.62;dopaminergic_PSI:0.104	950	-	10093727	10093914	0	2	50,50	0,137
chrX	10101544	10101709	neuron_readCounts:124;dopaminergic_readCounts:4;neuron_PSI:0.255;dopaminergic_PSI:0.015	950	+	10101544	10101709	0	2	50,50	0,115
chrX	10101544	10101892	neuron_readCounts:387;dopaminergic_readCounts:366;neuron_PSI:0.745;dopaminergic_PSI:0.985	950	+	10101544	10101892	0	2	50,50	0,298
chrX	10101636	10101892	neuron_readCounts:160;dopaminergic_readCounts:5;neuron_PSI:0.312;dopaminergic_PSI:0.019	950	+	10101636	10101892	0	2	50,50	0,206
chrIV	10116216	10116817	neuron_readCounts:4;dopaminergic_readCounts:85;neuron_PSI:0.051;dopaminergic_PSI:0.295	950	+	10116216	10116817	0	2	50,50	0,551
chrIV	10115512	10116817	neuron_readCounts:69;dopaminergic_readCounts:196;neuron_PSI:0.949;dopaminergic_PSI:0.705	950	+	10115512	10116817	0	2	50,50	0,1255
chrV	10130835	10130980	neuron_readCounts:339;dopaminergic_readCounts:1228;neuron_PSI:0.145;dopaminergic_PSI:0.438	950	-	10130835	10130980	0	2	50,50	0,95
chrV	10130827	10130980	neuron_readCounts:1653;dopaminergic_readCounts:1284;neuron_PSI:0.855;dopaminergic_PSI:0.562	950	-	10130827	10130980	0	2	50,50	0,103
chrIV	10165802	10166014	neuron_readCounts:356;dopaminergic_readCounts:1061;neuron_PSI:0.418;dopaminergic_PSI:0.826	950	-	10165802	10166014	0	2	50,50	0,162
chrIV	10165483	10166014	neuron_readCounts:468;dopaminergic_readCounts:140;neuron_PSI:0.582;dopaminergic_PSI:0.174	950	-	10165483	10166014	0	2	50,50	0,481
chrV	10250626	10250890	neuron_readCounts:218;dopaminergic_readCounts:421;neuron_PSI:0.245;dopaminergic_PSI:0.815	950	+	10250626	10250890	0	2	50,50	0,214
chrV	10250626	10251376	neuron_readCounts:671;dopaminergic_readCounts:88;neuron_PSI:0.755;dopaminergic_PSI:0.185	950	+	10250626	10251376	0	2	50,50	0,700
chrV	10250982	10251726	neuron_readCounts:310;dopaminergic_readCounts:432;neuron_PSI:0.211;dopaminergic_PSI:0.567	950	+	10250982	10251726	0	2	50,50	0,694
chrV	10251483	10251726	neuron_readCounts:1141;dopaminergic_readCounts:203;neuron_PSI:0.789;dopaminergic_PSI:0.433	950	+	10251483	10251726	0	2	50,50	0,193
chrIV	15449158	15449316	neuron_readCounts:125;dopaminergic_readCounts:467;neuron_PSI:0.242;dopaminergic_PSI:0.583	950	-	15449158	15449316	0	2	50,50	0,108
chrIV	15449146	15449316	neuron_readCounts:383;dopaminergic_readCounts:230;neuron_PSI:0.758;dopaminergic_PSI:0.417	950	-	15449146	15449316	0	2	50,50	0,120
chrV	15575018	15575388	neuron_readCounts:1765;dopaminergic_readCounts:1133;neuron_PSI:0.774;dopaminergic_PSI:0.345	950	-	15575018	15575388	0	2	50,50	0,320
chrV	15575024	15575388	neuron_readCounts:544;dopaminergic_readCounts:2090;neuron_PSI:0.226;dopaminergic_PSI:0.655	950	-	15575024	15575388	0	2	50,50	0,314
chrV	15578118	15578269	neuron_readCounts:430;dopaminergic_readCounts:1430;neuron_PSI:0.361;dopaminergic_PSI:0.718	950	-	15578118	15578269	0	2	50,50	0,101
chrV	15578107	15578269	neuron_readCounts:650;dopaminergic_readCounts:613;neuron_PSI:0.639;dopaminergic_PSI:0.282	950	-	15578107	15578269	0	2	50,50	0,112
chrX	10424098	10424281	neuron_readCounts:182;dopaminergic_readCounts:22;neuron_PSI:0.518;dopaminergic_PSI:0.192	950	-	10424098	10424281	0	2	50,50	0,133
chrX	10423761	10424281	neuron_readCounts:171;dopaminergic_readCounts:137;neuron_PSI:0.482;dopaminergic_PSI:0.808	950	-	10423761	10424281	0	2	50,50	0,470
chrX	10423761	10424171	neuron_readCounts:196;dopaminergic_readCounts:14;neuron_PSI:0.541;dopaminergic_PSI:0.146	950	-	10423761	10424171	0	2	50,50	0,360
chrIII	10466137	10467087	neuron_readCounts:274;dopaminergic_readCounts:20;neuron_PSI:0.422;dopaminergic_PSI:0.018	950	+	10466137	10467087	0	2	50,50	0,900
chrIII	10466137	10466344	neuron_readCounts:381;dopaminergic_readCounts:1716;neuron_PSI:0.578;dopaminergic_PSI:0.982	950	+	10466137	10466344	0	2	50,50	0,157
chrIII	10466532	10467087	neuron_readCounts:399;dopaminergic_readCounts:1417;neuron_PSI:0.609;dopaminergic_PSI:0.98	950	+	10466532	10467087	0	2	50,50	0,505
chrV	10473966	10474861	neuron_readCounts:12;dopaminergic_readCounts:58;neuron_PSI:0.038;dopaminergic_PSI:0.305	950	+	10473966	10474861	0	2	50,50	0,845
chrV	10473966	10474142	neuron_readCounts:306;dopaminergic_readCounts:132;neuron_PSI:0.962;dopaminergic_PSI:0.695	950	+	10473966	10474142	0	2	50,50	0,126
chrII	10570955	10571455	neuron_readCounts:7654;dopaminergic_readCounts:172;neuron_PSI:0.355;dopaminergic_PSI:0.109	950	+	10570955	10571455	0	2	50,50	0,450
chrII	10570955	10571870	neuron_readCounts:12931;dopaminergic_readCounts:1208;neuron_PSI:0.573;dopaminergic_PSI:0.796	950	+	10570955	10571870	0	2	50,50	0,865
chrII	10570955	10571881	neuron_readCounts:1501;dopaminergic_readCounts:150;neuron_PSI:0.072;dopaminergic_PSI:0.095	950	+	10570955	10571881	0	2	50,50	0,876
chrI	6345506	6347022	neuron_readCounts:135;dopaminergic_readCounts:177;neuron_PSI:0.098;dopaminergic_PSI:0.06	950	+	6345506	6347022	0	2	50,50	0,1466
chrI	6345506	6348341	neuron_readCounts:317;dopaminergic_readCounts:1598;neuron_PSI:0.286;dopaminergic_PSI:0.59	950	+	6345506	6348341	0	2	50,50	0,2785
chrI	6345506	6354021	neuron_readCounts:575;dopaminergic_readCounts:1083;neuron_PSI:0.599;dopaminergic_PSI:0.268	950	+	6345506	6354021	0	2	50,50	0,8465
chrI	6345506	6353409	neuron_readCounts:17;dopaminergic_readCounts:260;neuron_PSI:0.017;dopaminergic_PSI:0.082	950	+	6345506	6353409	0	2	50,50	0,7853
chrI	10639701	10639968	neuron_readCounts:783;dopaminergic_readCounts:1279;neuron_PSI:0.614;dopaminergic_PSI:0.915	950	-	10639701	10639968	0	2	50,50	0,217
chrI	10639823	10639968	neuron_readCounts:436;dopaminergic_readCounts:128;neuron_PSI:0.386;dopaminergic_PSI:0.085	950	-	10639823	10639968	0	2	50,50	0,95
chrI	10639701	10639890	neuron_readCounts:449;dopaminergic_readCounts:114;neuron_PSI:0.394;dopaminergic_PSI:0.082	950	-	10639701	10639890	0	2	50,50	0,139
chrV	10644748	10645019	neuron_readCounts:235;dopaminergic_readCounts:49;neuron_PSI:0.075;dopaminergic_PSI:0.255	950	+	10644748	10645019	0	2	50,50	0,221
chrV	10644615	10645019	neuron_readCounts:2652;dopaminergic_readCounts:134;neuron_PSI:0.925;dopaminergic_PSI:0.745	950	+	10644615	10645019	0	2	50,50	0,354
chrIV	10677552	10677723	neuron_readCounts:127;dopaminergic_readCounts:332;neuron_PSI:0.647;dopaminergic_PSI:0.38	950	+	10677552	10677723	0	2	50,50	0,121
chrIV	10677552	10677982	neuron_readCounts:60;dopaminergic_readCounts:761;neuron_PSI:0.353;dopaminergic_PSI:0.62	950	+	10677552	10677982	0	2	50,50	0,380
chrI	10751138	10763639	neuron_readCounts:47;dopaminergic_readCounts:108;neuron_PSI:0.22;dopaminergic_PSI:0.538	950	+	10751138	10763639	0	2	50,50	0,12451
chrI	10763297	10763639	neuron_readCounts:169;dopaminergic_readCounts:72;neuron_PSI:0.78;dopaminergic_PSI:0.462	950	+	10763297	10763639	0	2	50,50	0,292
chrX	10778957	10779110	neuron_readCounts:95;dopaminergic_readCounts:60;neuron_PSI:0.77;dopaminergic_PSI:0.965	950	+	10778957	10779110	0	2	50,50	0,103
chrX	10778813	10779110	neuron_readCounts:29;dopaminergic_readCounts:2;neuron_PSI:0.23;dopaminergic_PSI:0.035	950	+	10778813	10779110	0	2	50,50	0,247
chrX	10795095	10796559	neuron_readCounts:135;dopaminergic_readCounts:25;neuron_PSI:0.134;dopaminergic_PSI:0.093	950	-	10795095	10796559	0	2	50,50	0,1414
chrX	10795284	10796559	neuron_readCounts:48;dopaminergic_readCounts:2;neuron_PSI:0.047;dopaminergic_PSI:0.026	950	-	10795284	10796559	0	2	50,50	0,1225
chrX	10795157	10796559	neuron_readCounts:758;dopaminergic_readCounts:96;neuron_PSI:0.798;dopaminergic_PSI:0.459	950	-	10795157	10796559	0	2	50,50	0,1352
chrX	10796001	10796559	neuron_readCounts:13;dopaminergic_readCounts:46;neuron_PSI:0.015;dopaminergic_PSI:0.333	950	-	10796001	10796559	0	2	50,50	0,508
chrX	10795152	10796559	neuron_readCounts:4;dopaminergic_readCounts:24;neuron_PSI:0.006;dopaminergic_PSI:0.09	950	-	10795152	10796559	0	2	50,50	0,1357
chrIV	10930187	10930681	neuron_readCounts:55;dopaminergic_readCounts:78;neuron_PSI:0.595;dopaminergic_PSI:0.942	950	-	10930187	10930681	0	2	50,50	0,444
chrIV	10930372	10930681	neuron_readCounts:30;dopaminergic_readCounts:3;neuron_PSI:0.405;dopaminergic_PSI:0.058	950	-	10930372	10930681	0	2	50,50	0,259
chrIV	10930187	10930445	neuron_readCounts:37;dopaminergic_readCounts:3;neuron_PSI:0.452;dopaminergic_PSI:0.058	950	-	10930187	10930445	0	2	50,50	0,208
chrIII	11023626	11023806	neuron_readCounts:919;dopaminergic_readCounts:37;neuron_PSI:0.994;dopaminergic_PSI:0.452	950	+	11023626	11023806	0	2	50,50	0,130
chrII	11060014	11060312	neuron_readCounts:137;dopaminergic_readCounts:41;neuron_PSI:0.204;dopaminergic_PSI:0.543	950	-	11060014	11060312	0	2	50,50	0,248
chrII	11060167	11060312	neuron_readCounts:509;dopaminergic_readCounts:32;neuron_PSI:0.796;dopaminergic_PSI:0.457	950	-	11060167	11060312	0	2	50,50	0,95
chrII	11060014	11060246	neuron_readCounts:527;dopaminergic_readCounts:15;neuron_PSI:0.801;dopaminergic_PSI:0.276	950	-	11060014	11060246	0	2	50,50	0,182
chrX	11203241	11204212	neuron_readCounts:42;dopaminergic_readCounts:2;neuron_PSI:0.203;dopaminergic_PSI:0.014	950	-	11203241	11204212	0	2	50,50	0,921
chrII	11218317	11219507	neuron_readCounts:76;dopaminergic_readCounts:445;neuron_PSI:0.696;dopaminergic_PSI:0.937	950	+	11218317	11219507	0	2	50,50	0,1140
chrII	11218317	11218499	neuron_readCounts:35;dopaminergic_readCounts:22;neuron_PSI:0.304;dopaminergic_PSI:0.063	950	+	11218317	11218499	0	2	50,50	0,132
chrV	11227402	11228326	neuron_readCounts:9349;dopaminergic_readCounts:3905;neuron_PSI:0.783;dopaminergic_PSI:0.473	950	-	11227402	11228326	0	2	50,50	0,874
chrV	11226886	11228326	neuron_readCounts:2638;dopaminergic_readCounts:4138;neuron_PSI:0.217;dopaminergic_PSI:0.527	950	-	11226886	11228326	0	2	50,50	0,1390
chrV	11226886	11227468	neuron_readCounts:9761;dopaminergic_readCounts:4033;neuron_PSI:0.789;dopaminergic_PSI:0.492	950	-	11226886	11227468	0	2	50,50	0,532
chrII	11385881	11386118	neuron_readCounts:946;dopaminergic_readCounts:399;neuron_PSI:0.854;dopaminergic_PSI:0.583	950	-	11385881	11386118	0	2	50,50	0,187
chrII	11385104	11386118	neuron_readCounts:158;dopaminergic_readCounts:371;neuron_PSI:0.146;dopaminergic_PSI:0.417	950	-	11385104	11386118	0	2	50,50	0,964
chrIII	11466043	11466266	neuron_readCounts:242;dopaminergic_readCounts:250;neuron_PSI:0.702;dopaminergic_PSI:0.942	950	-	11466043	11466266	0	2	50,50	0,173
chrIII	11466043	11468741	neuron_readCounts:102;dopaminergic_readCounts:16;neuron_PSI:0.298;dopaminergic_PSI:0.058	950	-	11466043	11468741	0	2	50,50	0,2648
chrI	11521947	11522180	neuron_readCounts:253;dopaminergic_readCounts:20;neuron_PSI:0.466;dopaminergic_PSI:0.119	950	+	11521947	11522180	0	2	50,50	0,183
chrI	11521947	11522174	neuron_readCounts:210;dopaminergic_readCounts:83;neuron_PSI:0.379;dopaminergic_PSI:0.341	950	+	11521947	11522174	0	2	50,50	0,177
chrI	11521947	11523866	neuron_readCounts:77;dopaminergic_readCounts:302;neuron_PSI:0.155;dopaminergic_PSI:0.541	950	+	11521947	11523866	0	2	50,50	0,1869
chrII	11624473	11624678	neuron_readCounts:20;dopaminergic_readCounts:42;neuron_PSI:0.193;dopaminergic_PSI:0.803	950	-	11624473	11624678	0	2	50,50	0,155
chrII	11623746	11624678	neuron_readCounts:105;dopaminergic_readCounts:11;neuron_PSI:0.807;dopaminergic_PSI:0.197	950	-	11623746	11624678	0	2	50,50	0,882
chrII	11623746	11623985	neuron_readCounts:33;dopaminergic_readCounts:50;neuron_PSI:0.255;dopaminergic_PSI:0.828	950	-	11623746	11623985	0	2	50,50	0,189
chrX	11670390	11670787	neuron_readCounts:347;dopaminergic_readCounts:256;neuron_PSI:0.53;dopaminergic_PSI:0.972	950	+	11670390	11670787	0	2	50,50	0,347
chrX	11670390	11670536	neuron_readCounts:308;dopaminergic_readCounts:4;neuron_PSI:0.47;dopaminergic_PSI:0.028	950	+	11670390	11670536	0	2	50,50	0,96
chrX	11670450	11670787	neuron_readCounts:212;dopaminergic_readCounts:2;neuron_PSI:0.38;dopaminergic_PSI:0.011	950	+	11670450	11670787	0	2	50,50	0,287
chrI	11688913	11689394	neuron_readCounts:70;dopaminergic_readCounts:16;neuron_PSI:0.018;dopaminergic_PSI:0.087	950	-	11688913	11689394	0	2	50,50	0,431
chrI	11689063	11689394	neuron_readCounts:3599;dopaminergic_readCounts:129;neuron_PSI:0.853;dopaminergic_PSI:0.459	950	-	11689063	11689394	0	2	50,50	0,281
chrI	11688938	11689394	neuron_readCounts:533;dopaminergic_readCounts:127;neuron_PSI:0.129;dopaminergic_PSI:0.454	950	-	11688938	11689394	0	2	50,50	0,406
chrI	11688938	11689084	neuron_readCounts:2617;dopaminergic_readCounts:111;neuron_PSI:0.806;dopaminergic_PSI:0.435	950	-	11688938	11689084	0	2	50,50	0,96
chrI	11748807	11749324	neuron_readCounts:232;dopaminergic_readCounts:14507;neuron_PSI:0.731;dopaminergic_PSI:0.96	950	-	11748807	11749324	0	2	50,50	0,467
chrI	11749111	11749324	neuron_readCounts:85;dopaminergic_readCounts:483;neuron_PSI:0.269;dopaminergic_PSI:0.04	950	-	11749111	11749324	0	2	50,50	0,163
chrI	11748807	11749178	neuron_readCounts:81;dopaminergic_readCounts:456;neuron_PSI:0.258;dopaminergic_PSI:0.044	950	-	11748807	11749178	0	2	50,50	0,321
chrIV	11769604	11770079	neuron_readCounts:70;dopaminergic_readCounts:208;neuron_PSI:0.153;dopaminergic_PSI:0.84	950	-	11769604	11770079	0	2	50,50	0,425
chrIV	11769830	11770079	neuron_readCounts:1101;dopaminergic_readCounts:22;neuron_PSI:0.847;dopaminergic_PSI:0.16	950	-	11769830	11770079	0	2	50,50	0,199
chrIII	11839825	11841897	neuron_readCounts:527;dopaminergic_readCounts:25;neuron_PSI:0.628;dopaminergic_PSI:0.117	950	-	11839825	11841897	0	2	50,50	0,2022
chrIII	11838070	11841897	neuron_readCounts:305;dopaminergic_readCounts:589;neuron_PSI:0.372;dopaminergic_PSI:0.883	950	-	11838070	11841897	0	2	50,50	0,3777
chrIII	11838070	11839799	neuron_readCounts:807;dopaminergic_readCounts:35;neuron_PSI:0.725;dopaminergic_PSI:0.095	950	-	11838070	11839799	0	2	50,50	0,1679
chrII	11848322	11848472	neuron_readCounts:193;dopaminergic_readCounts:54;neuron_PSI:0.519;dopaminergic_PSI:0.102	950	-	11848322	11848472	0	2	50,50	0,100
chrII	11847976	11848472	neuron_readCounts:132;dopaminergic_readCounts:283;neuron_PSI:0.481;dopaminergic_PSI:0.898	950	-	11847976	11848472	0	2	50,50	0,446
chrV	11849441	11849838	neuron_readCounts:730;dopaminergic_readCounts:45;neuron_PSI:0.63;dopaminergic_PSI:0.053	950	+	11849441	11849838	0	2	50,50	0,347
chrV	11849441	11850830	neuron_readCounts:501;dopaminergic_readCounts:977;neuron_PSI:0.37;dopaminergic_PSI:0.947	950	+	11849441	11850830	0	2	50,50	0,1339
chrV	11849832	11850830	neuron_readCounts:777;dopaminergic_readCounts:147;neuron_PSI:0.645;dopaminergic_PSI:0.133	950	+	11849832	11850830	0	2	50,50	0,948
chrIII	8906224	8907016	neuron_readCounts:178;dopaminergic_readCounts:42;neuron_PSI:0.848;dopaminergic_PSI:0.237	950	+	8906224	8907016	0	2	50,50	0,742
chrIII	8906224	8906573	neuron_readCounts:19;dopaminergic_readCounts:50;neuron_PSI:0.09;dopaminergic_PSI:0.457	950	+	8906224	8906573	0	2	50,50	0,299
chrIII	8906224	8907360	neuron_readCounts:12;dopaminergic_readCounts:43;neuron_PSI:0.061;dopaminergic_PSI:0.307	950	+	8906224	8907360	0	2	50,50	0,1086
chrIII	8907023	8907642	neuron_readCounts:233;dopaminergic_readCounts:21;neuron_PSI:0.847;dopaminergic_PSI:0.304	950	+	8907023	8907642	0	2	50,50	0,569
chrIII	8907382	8907642	neuron_readCounts:16;dopaminergic_readCounts:40;neuron_PSI:0.062;dopaminergic_PSI:0.425	950	+	8907382	8907642	0	2	50,50	0,210
chrIII	8906628	8907642	neuron_readCounts:23;dopaminergic_readCounts:25;neuron_PSI:0.092;dopaminergic_PSI:0.271	950	+	8906628	8907642	0	2	50,50	0,964
chrIV	12135521	12136127	neuron_readCounts:837;dopaminergic_readCounts:8;neuron_PSI:0.267;dopaminergic_PSI:0.02	950	-	12135521	12136127	0	2	50,50	0,556
chrIV	12135521	12136252	neuron_readCounts:2096;dopaminergic_readCounts:1371;neuron_PSI:0.717;dopaminergic_PSI:0.929	950	-	12135521	12136252	0	2	50,50	0,681
chrIV	12135529	12136252	neuron_readCounts:52;dopaminergic_readCounts:122;neuron_PSI:0.016;dopaminergic_PSI:0.051	950	-	12135529	12136252	0	2	50,50	0,673
chrI	9174289	9175044	neuron_readCounts:958;dopaminergic_readCounts:210;neuron_PSI:0.497;dopaminergic_PSI:0.11	950	+	9174289	9175044	0	2	50,50	0,705
chrI	9174828	9175044	neuron_readCounts:54;dopaminergic_readCounts:186;neuron_PSI:0.037;dopaminergic_PSI:0.081	950	+	9174828	9175044	0	2	50,50	0,166
chrI	9171542	9175044	neuron_readCounts:888;dopaminergic_readCounts:1101;neuron_PSI:0.466;dopaminergic_PSI:0.809	950	+	9171542	9175044	0	2	50,50	0,3452
chrII	12282774	12283409	neuron_readCounts:78;dopaminergic_readCounts:70;neuron_PSI:0.422;dopaminergic_PSI:0.098	950	+	12282774	12283409	0	2	50,50	0,585
chrII	12280730	12283409	neuron_readCounts:82;dopaminergic_readCounts:439;neuron_PSI:0.578;dopaminergic_PSI:0.902	950	+	12280730	12283409	0	2	50,50	0,2629
chrV	12348226	12348379	neuron_readCounts:45;dopaminergic_readCounts:96;neuron_PSI:0.332;dopaminergic_PSI:0.709	950	+	12348226	12348379	0	2	50,50	0,103
chrV	12346026	12348379	neuron_readCounts:61;dopaminergic_readCounts:23;neuron_PSI:0.517;dopaminergic_PSI:0.196	950	+	12346026	12348379	0	2	50,50	0,2303
chrV	12346324	12348379	neuron_readCounts:23;dopaminergic_readCounts:11;neuron_PSI:0.151;dopaminergic_PSI:0.095	950	+	12346324	12348379	0	2	50,50	0,2005
chrIV	12352261	12353193	neuron_readCounts:502;dopaminergic_readCounts:49;neuron_PSI:0.825;dopaminergic_PSI:0.273	950	+	12352261	12353193	0	2	50,50	0,882
chrIV	12353005	12353193	neuron_readCounts:112;dopaminergic_readCounts:111;neuron_PSI:0.175;dopaminergic_PSI:0.727	950	+	12353005	12353193	0	2	50,50	0,138
chrIV	12353754	12354145	neuron_readCounts:388;dopaminergic_readCounts:607;neuron_PSI:0.248;dopaminergic_PSI:0.77	950	+	12353754	12354145	0	2	50,50	0,341
chrIV	12353754	12353946	neuron_readCounts:1631;dopaminergic_readCounts:176;neuron_PSI:0.752;dopaminergic_PSI:0.23	950	+	12353754	12353946	0	2	50,50	0,142
chrIV	12353879	12354145	neuron_readCounts:1640;dopaminergic_readCounts:176;neuron_PSI:0.765;dopaminergic_PSI:0.23	950	+	12353879	12354145	0	2	50,50	0,216
chrIV	12354107	12354598	neuron_readCounts:563;dopaminergic_readCounts:81;neuron_PSI:0.315;dopaminergic_PSI:0.089	950	+	12354107	12354598	0	2	50,50	0,441
chrIV	12354107	12355439	neuron_readCounts:1122;dopaminergic_readCounts:604;neuron_PSI:0.519;dopaminergic_PSI:0.852	950	+	12354107	12355439	0	2	50,50	0,1282
chrIV	12354107	12354556	neuron_readCounts:291;dopaminergic_readCounts:39;neuron_PSI:0.166;dopaminergic_PSI:0.059	950	+	12354107	12354556	0	2	50,50	0,399
chrIV	12354568	12355439	neuron_readCounts:812;dopaminergic_readCounts:63;neuron_PSI:0.462;dopaminergic_PSI:0.097	950	+	12354568	12355439	0	2	50,50	0,821
chrIII	12402013	12404834	neuron_readCounts:64;dopaminergic_readCounts:222;neuron_PSI:0.598;dopaminergic_PSI:0.985	950	-	12402013	12404834	0	2	50,50	0,2771
chrIII	12402013	12404181	neuron_readCounts:46;dopaminergic_readCounts:2;neuron_PSI:0.402;dopaminergic_PSI:0.015	950	-	12402013	12404181	0	2	50,50	0,2118
chrIV	12413751	12413903	neuron_readCounts:5936;dopaminergic_readCounts:105;neuron_PSI:0.962;dopaminergic_PSI:0.348	950	-	12413751	12413903	0	2	50,50	0,102
chrIV	12413189	12413903	neuron_readCounts:212;dopaminergic_readCounts:264;neuron_PSI:0.038;dopaminergic_PSI:0.652	950	-	12413189	12413903	0	2	50,50	0,664
chrIV	12413189	12413794	neuron_readCounts:7515;dopaminergic_readCounts:252;neuron_PSI:0.968;dopaminergic_PSI:0.534	950	-	12413189	12413794	0	2	50,50	0,555
chrV	12455968	12456547	neuron_readCounts:401;dopaminergic_readCounts:2;neuron_PSI:0.268;dopaminergic_PSI:0.021	950	-	12455968	12456547	0	2	50,50	0,529
chrV	12454599	12456547	neuron_readCounts:1195;dopaminergic_readCounts:93;neuron_PSI:0.732;dopaminergic_PSI:0.979	950	-	12454599	12456547	0	2	50,50	0,1898
chrV	18693491	18695570	neuron_readCounts:321;dopaminergic_readCounts:576;neuron_PSI:0.243;dopaminergic_PSI:0.564	950	+	18693491	18695570	0	2	50,50	0,2029
chrV	18693491	18695579	neuron_readCounts:868;dopaminergic_readCounts:470;neuron_PSI:0.757;dopaminergic_PSI:0.436	950	+	18693491	18695579	0	2	50,50	0,2038
[truncated: 204 more rows]

## Sheet: neuron_vs_serotonergic
track name=neuron_vs_serotonergic description='neuron_vs_serotonergic_tissue_differential'
[truncated: 794 more rows]

[truncated: 1 more sheets: dopaminergic_vs_serotonergic]
