# Supplementary material for: Global regulatory features of alternative splicing across tissues and within the nervous system of C. elegans
Source: Genome Res. 2020 Dec;30(12):1766–80. doi: 10.1101/gr.267328.120 (PMC7706725; doi:10.1101/gr.267328.120)
Supplement: Supplemental Material [file supp_gr.267328.120_Supplemental_Table_S5.xlsx]

## Sheet: Legend
Supplemental Table S5: Spreadsheet with over-represented GO terms from pair-wise tissue-regulated splicing comparisons

## Sheet: muscle_vs_intestine_diffspliced
Gene Set	Description	Size	Expect	Ratio	P Value	FDR
GO:0032502	developmental process	1724	18.277	2.298	1.708e-08	5.6278e-05
GO:0048856	anatomical structure development	1624	17.217	2.3233	3.5158e-08	0.00011584
GO:0030036	actin cytoskeleton organization	153	1.622	7.3981	6.3103e-08	0.00020793
GO:0030029	actin filament-based process	157	1.6644	7.2096	8.4062e-08	0.00027698
GO:0097435	supramolecular fiber organization	144	1.5266	7.2055	3.0486e-07	0.0010045
GO:0048518	positive regulation of biological process	1107	11.736	2.5563	5.5396e-07	0.0018253
GO:0007015	actin filament organization	72	0.76331	10.481	8.0565e-07	0.0026546
GO:0007010	cytoskeleton organization	368	3.9014	4.1011	1.3032e-06	0.0042942
GO:0048522	positive regulation of cellular process	864	9.1597	2.7293	2.073e-06	0.0068306
GO:0090066	regulation of anatomical structure size	112	1.1874	7.5798	2.5542e-06	0.0084161
GO:0040011	locomotion	498	5.2796	3.4094	3.724e-06	0.012271
GO:0007275	multicellular organism development	1519	16.104	2.1113	6.3248e-06	0.02084
GO:0008154	actin polymerization or depolymerization	46	0.48767	12.303	8.0211e-06	0.026429
GO:0051128	regulation of cellular component organization	482	5.1099	3.3269	1.0021e-05	0.033019
GO:0048869	cellular developmental process	767	8.1314	2.7056	1.1545e-05	0.038041
GO:0050793	regulation of developmental process	492	5.2159	3.2592	1.3124e-05	0.043244
GO:0032535	regulation of cellular component size	105	1.1132	7.1867	1.4112e-05	0.046498
GO:0023051	regulation of signaling	443	4.6965	3.4068	1.4143e-05	0.046602
GO:0002119	nematode larval development	445	4.7177	3.3915	1.4961e-05	0.049296

## Sheet: neuron_vs_muscle_diffspliced
Gene Set	Description	Size	Expect	Ratio	P Value	FDR
GO:0007010	cytoskeleton organization	368	6.3095	4.4377	1.878e-11	6.188e-08
GO:0097435	supramolecular fiber organization	144	2.4689	6.8855	3.1075e-10	1.0239e-06
GO:0030036	actin cytoskeleton organization	153	2.6233	6.4805	8.109e-10	2.6719e-06
GO:0030029	actin filament-based process	157	2.6918	6.3154	1.2154e-09	4.0046e-06
GO:0048856	anatomical structure development	1622	27.81	2.0856	5.0042e-09	1.6489e-05
GO:0032502	developmental process	1723	29.542	2.031	6.5039e-09	2.143e-05
GO:0032989	cellular component morphogenesis	233	3.9949	4.7561	1.4644e-08	4.8252e-05
GO:0061061	muscle structure development	86	1.4745	8.1383	2.1385e-08	7.0462e-05
GO:0048468	cell development	452	7.7497	3.3549	4.1586e-08	0.00013703
GO:0032879	regulation of localization	424	7.2697	3.4389	4.8511e-08	0.00015984
GO:0016043	cellular component organization	1787	30.639	1.893	1.8497e-07	0.00060948
GO:0040011	locomotion	499	8.5556	3.039	2.9757e-07	0.0009805
GO:0048518	positive regulation of biological process	1104	18.929	2.2189	3.031e-07	0.00099873
GO:0007015	actin filament organization	72	1.2345	8.1006	3.5148e-07	0.0011581
GO:0048869	cellular developmental process	765	13.116	2.516	4.9966e-07	0.0016464
GO:0051094	positive regulation of developmental process	235	4.0292	4.2192	5.0016e-07	0.001648
GO:0051128	regulation of cellular component organization	482	8.2641	3.0251	5.6694e-07	0.0018681
GO:0055001	muscle cell development	44	0.7544	10.604	6.5172e-07	0.0021474
GO:0055002	striated muscle cell development	44	0.7544	10.604	6.5172e-07	0.0021474
GO:0071840	cellular component organization or biogenesis	1911	32.765	1.8007	8.0961e-07	0.0026677
GO:0030154	cell differentiation	744	12.756	2.5086	8.275e-07	0.0027266
GO:0051146	striated muscle cell differentiation	47	0.80584	9.9276	1.1071e-06	0.0036479
GO:0044087	regulation of cellular component biogenesis	149	2.5547	5.0887	1.4853e-06	0.0048941
GO:0051239	regulation of multicellular organismal process	547	9.3786	2.7723	1.7222e-06	0.0056747
GO:0007399	nervous system development	326	5.5894	3.3993	2.7672e-06	0.0091179
GO:0051240	positive regulation of multicellular organismal process	266	4.5607	3.7275	2.7986e-06	0.0092213
GO:0050793	regulation of developmental process	491	8.4184	2.8509	2.8131e-06	0.0092691
GO:0045597	positive regulation of cell differentiation	91	1.5602	6.4093	3.1894e-06	0.010509
GO:0031032	actomyosin structure organization	54	0.92585	8.6407	3.3097e-06	0.010905
GO:1902903	regulation of supramolecular fiber organization	56	0.96015	8.3321	4.3895e-06	0.014463
GO:0030239	myofibril assembly	41	0.70296	9.9578	5.2259e-06	0.017219
GO:0010720	positive regulation of cell development	76	1.3031	6.9068	5.3987e-06	0.017789
GO:0016310	phosphorylation	734	12.585	2.3838	5.5586e-06	0.018316
GO:0035556	intracellular signal transduction	511	8.7613	2.7393	5.6114e-06	0.01849
GO:0051493	regulation of cytoskeleton organization	120	2.0575	5.3464	6.1042e-06	0.020113
GO:0010927	cellular component assembly involved in morphogenesis	42	0.72011	9.7208	6.1817e-06	0.020369
GO:0023051	regulation of signaling	444	7.6126	2.89	6.1846e-06	0.020378
GO:0042692	muscle cell differentiation	59	1.0116	7.9084	6.5609e-06	0.021618
GO:0048522	positive regulation of cellular process	862	14.779	2.2328	7.0346e-06	0.023179
GO:0007275	multicellular organism development	1517	26.01	1.8455	7.6453e-06	0.025191
GO:0065008	regulation of biological quality	758	12.996	2.3084	1.0544e-05	0.034743

## Sheet: neuron_vs_intestine_diffspliced
Gene Set	Description	Size	Expect	Ratio	P Value	FDR
GO:0032502	developmental process	1727	37.726	2.147	4.4653e-13	1.4713e-09
GO:0048856	anatomical structure development	1626	35.52	2.196	4.8983e-13	1.614e-09
GO:0007275	multicellular organism development	1521	33.226	2.2272	1.3911e-12	4.5837e-09
GO:0040011	locomotion	499	10.901	3.3943	3.2172e-11	1.0601e-07
GO:0007399	nervous system development	327	7.1433	3.7798	2.0322e-09	6.6962e-06
GO:0032879	regulation of localization	424	9.2623	3.3469	2.2729e-09	7.4893e-06
GO:0065008	regulation of biological quality	760	16.602	2.4696	3.6632e-08	0.0001207
GO:0048518	positive regulation of biological process	1109	24.226	2.1465	3.9823e-08	0.00013122
GO:0048522	positive regulation of cellular process	866	18.918	2.3259	6.0958e-08	0.00020086
GO:0051128	regulation of cellular component organization	482	10.529	2.8492	1.6461e-07	0.00054241
GO:0048731	system development	653	14.265	2.5237	1.7322e-07	0.00057075
GO:0040012	regulation of locomotion	258	5.636	3.7261	1.8575e-07	0.00061205
GO:0050808	synapse organization	80	1.7476	6.2944	1.1443e-06	0.0037705
GO:0007010	cytoskeleton organization	368	8.0389	2.9855	1.4223e-06	0.0046864
GO:0016043	cellular component organization	1788	39.059	1.7154	1.5307e-06	0.0050438
GO:0050772	positive regulation of axonogenesis	29	0.6335	11.05	2.2112e-06	0.007286
GO:0048666	neuron development	210	4.5874	3.7058	3.1416e-06	0.010352
GO:0048699	generation of neurons	258	5.636	3.3712	3.328e-06	0.010966
GO:0031175	neuron projection development	191	4.1724	3.8347	3.9817e-06	0.01312
GO:0010976	positive regulation of neuron projection development	44	0.96118	8.3231	4.0516e-06	0.01335
GO:0022008	neurogenesis	262	5.7234	3.3197	4.1735e-06	0.013752
GO:0045597	positive regulation of cell differentiation	91	1.9879	5.5335	4.1928e-06	0.013815
GO:0045666	positive regulation of neuron differentiation	45	0.98302	8.1382	4.8363e-06	0.015936
GO:0051240	positive regulation of multicellular organismal process	266	5.8108	3.2698	5.2088e-06	0.017163
GO:0010720	positive regulation of cell development	76	1.6602	6.0233	5.3487e-06	0.017624
GO:0048584	positive regulation of response to stimulus	245	5.352	3.3632	6.3149e-06	0.020808
GO:0010770	positive regulation of cell morphogenesis involved in differentiation	34	0.74273	9.4247	6.9478e-06	0.022893
GO:0016310	phosphorylation	734	16.034	2.1828	7.6074e-06	0.025067
GO:0051962	positive regulation of nervous system development	64	1.3981	6.4374	9.1729e-06	0.030225
GO:0032103	positive regulation of response to external stimulus	64	1.3981	6.4374	9.1729e-06	0.030225
GO:0051960	regulation of nervous system development	139	3.0364	4.2813	1.0073e-05	0.033191
GO:0032101	regulation of response to external stimulus	119	2.5995	4.6162	1.0321e-05	0.034009
GO:0061564	axon development	161	3.517	3.9806	1.0634e-05	0.03504
GO:0050769	positive regulation of neurogenesis	50	1.0922	7.3244	1.0971e-05	0.036149
GO:0031346	positive regulation of cell projection organization	50	1.0922	7.3244	1.0971e-05	0.036149
GO:0007409	axonogenesis	142	3.102	4.1909	1.2715e-05	0.041896
GO:0030182	neuron differentiation	235	5.1336	3.3115	1.4161e-05	0.046659

## Sheet: neuron_vs_dopamin._diffspliced
Gene Set	Description	Size	Expect	Ratio	P Value	FDR
GO:0048856	anatomical structure development	1625	46.192	2.035	4.4686e-13	1.4724e-09
GO:0032502	developmental process	1726	49.063	1.9771	9.1194e-13	3.0048e-09
GO:0007275	multicellular organism development	1520	43.207	2.0598	1.3556e-12	4.4666e-09
GO:0048518	positive regulation of biological process	1108	31.496	2.2543	1.0573e-11	3.4838e-08
GO:0048522	positive regulation of cellular process	864	24.56	2.4023	8.2383e-11	2.7145e-07
GO:0051641	cellular localization	811	23.053	2.4291	1.8572e-10	6.1194e-07
GO:0016043	cellular component organization	1788	50.825	1.8298	3.208e-10	1.057e-06
GO:0051128	regulation of cellular component organization	482	13.701	2.9194	6.3325e-10	2.0866e-06
GO:0040011	locomotion	499	14.184	2.82	1.7641e-09	5.8127e-06
GO:0048731	system development	653	18.562	2.532	1.9373e-09	6.3836e-06
GO:0032879	regulation of localization	424	12.053	2.9869	2.76e-09	9.0942e-06
GO:0071840	cellular component organization or biogenesis	1912	54.35	1.7295	5.3557e-09	1.7647e-05
GO:0007399	nervous system development	328	9.3237	3.1104	4.6134e-08	0.00015201
GO:0045595	regulation of cell differentiation	235	6.6801	3.5928	4.8205e-08	0.00015884
GO:0007010	cytoskeleton organization	368	10.461	2.8679	1.6313e-07	0.00053751
GO:0030154	cell differentiation	747	21.234	2.1663	3.4899e-07	0.0011499
GO:0009790	embryo development	493	14.014	2.4975	4.1933e-07	0.0013817
GO:0050793	regulation of developmental process	493	14.014	2.4975	4.1933e-07	0.0013817
GO:0051649	establishment of localization in cell	614	17.453	2.2918	5.5116e-07	0.0018161
GO:0048869	cellular developmental process	768	21.831	2.1071	7.7248e-07	0.0025453
GO:0016192	vesicle-mediated transport	419	11.91	2.6028	8.534e-07	0.002812
GO:0060255	regulation of macromolecule metabolic process	1613	45.851	1.6794	9.3787e-07	0.0030903
GO:0010604	positive regulation of macromolecule metabolic process	559	15.89	2.3285	1.0633e-06	0.0035034
GO:0019222	regulation of metabolic process	1678	47.699	1.6562	1.1152e-06	0.0036746
GO:0009653	anatomical structure morphogenesis	561	15.947	2.3202	1.1592e-06	0.0038195
GO:0009893	positive regulation of metabolic process	586	16.658	2.2813	1.2367e-06	0.0040749
GO:2000026	regulation of multicellular organismal development	348	9.8922	2.7294	1.8659e-06	0.0061482
GO:0051239	regulation of multicellular organismal process	549	15.606	2.3068	1.8872e-06	0.0062184
GO:0031325	positive regulation of cellular metabolic process	533	15.151	2.3101	2.5854e-06	0.0085188
GO:0032989	cellular component morphogenesis	233	6.6232	3.1707	2.7059e-06	0.008916
GO:0051173	positive regulation of nitrogen compound metabolic process	511	14.526	2.3407	2.7302e-06	0.0089961
GO:0035556	intracellular signal transduction	512	14.554	2.3361	2.8516e-06	0.009396
GO:0040012	regulation of locomotion	258	7.3339	2.9998	3.8867e-06	0.012807
GO:0033036	macromolecule localization	822	23.366	1.9687	5.0404e-06	0.016608
GO:0040017	positive regulation of locomotion	117	3.3258	4.2095	5.2888e-06	0.017427
GO:0009792	embryo development ending in birth or egg hatching	304	8.6414	2.7773	5.3492e-06	0.017626
GO:0044093	positive regulation of molecular function	224	6.3674	3.141	5.4434e-06	0.017936
GO:0043085	positive regulation of catalytic activity	205	5.8273	3.2605	5.4658e-06	0.01801
GO:0051640	organelle localization	244	6.9359	3.0277	5.6255e-06	0.018536
GO:0048584	positive regulation of response to stimulus	246	6.9928	3.0031	6.3932e-06	0.021066
GO:0048667	cell morphogenesis involved in neuron differentiation	153	4.3492	3.6789	6.6442e-06	0.021893
GO:0032270	positive regulation of cellular protein metabolic process	211	5.9978	3.1678	8.324e-06	0.027428

## Sheet: neuron_vs_seroton._diffspliced
Gene Set	Description	Size	Expect	Ratio	P Value	FDR
GO:0032502	developmental process	1725	38.386	2.2925	3.3307e-16	1.0975e-12
GO:0048856	anatomical structure development	1624	36.138	2.3521	3.3307e-16	1.0975e-12
GO:0007275	multicellular organism development	1519	33.802	2.3372	1.0658e-14	3.5119e-11
GO:0007010	cytoskeleton organization	368	8.1889	3.7856	1.0802e-10	3.5593e-07
GO:0048518	positive regulation of biological process	1104	24.567	2.3202	3.6389e-10	1.199e-06
GO:0048522	positive regulation of cellular process	862	19.182	2.5024	1.1715e-09	3.8603e-06
GO:0016043	cellular component organization	1787	39.765	1.8609	9.0936e-09	2.9963e-05
GO:0040011	locomotion	499	11.104	2.9719	1.3028e-08	4.2927e-05
GO:0051128	regulation of cellular component organization	482	10.726	2.9835	2.0388e-08	6.7179e-05
GO:0032879	regulation of localization	424	9.4351	3.0736	5.3731e-08	0.00017705
GO:0071840	cellular component organization or biogenesis	1911	42.525	1.7637	7.415e-08	0.00024433
GO:0035556	intracellular signal transduction	511	11.371	2.6383	8.6697e-07	0.0028567
GO:0007399	nervous system development	328	7.2988	3.1512	9.5015e-07	0.0031307
GO:0048519	negative regulation of biological process	937	20.851	2.1103	9.9458e-07	0.0032771
GO:0050793	regulation of developmental process	493	10.97	2.6435	1.2989e-06	0.00428
GO:0051130	positive regulation of cellular component organization	195	4.3392	3.9177	1.457e-06	0.0048007
GO:0048731	system development	653	14.531	2.3398	2.3256e-06	0.0076629
GO:0051231	spindle elongation	20	0.44505	13.482	3.3614e-06	0.011076
GO:0097435	supramolecular fiber organization	144	3.2044	4.369	3.5708e-06	0.011766
GO:0000226	microtubule cytoskeleton organization	210	4.673	3.6379	4.0385e-06	0.013307
GO:0045595	regulation of cell differentiation	235	5.2293	3.4421	4.5626e-06	0.015034
GO:0006996	organelle organization	1208	26.881	1.86	6.3331e-06	0.020867
GO:0051641	cellular localization	811	18.047	2.1056	6.8136e-06	0.022451
GO:0048523	negative regulation of cellular process	691	15.376	2.2112	8.0645e-06	0.026572
GO:0046785	microtubule polymerization	14	0.31153	16.05	8.8171e-06	0.029052
GO:2000026	regulation of multicellular organismal development	348	7.7439	2.841	9.0196e-06	0.029719
GO:1903311	regulation of mRNA metabolic process	64	1.4242	6.3195	1.0647e-05	0.035083
GO:0060284	regulation of cell development	159	3.5381	3.9569	1.1369e-05	0.03746
GO:0009790	embryo development	493	10.97	2.4611	1.184e-05	0.039012
