# Supplementary material for: Global regulatory features of alternative splicing across tissues and within the nervous system of C. elegans
Source: Genome Res. 2020 Dec;30(12):1766–80. doi: 10.1101/gr.267328.120 (PMC7706725; doi:10.1101/gr.267328.120)
Supplement: Supplemental Material [file supp_gr.267328.120_Supplemental_Table_S6.xlsx]

## Sheet: Legend
Supplemental Table S6: Spreadsheet with over-represented GO terms from splicing and gene expression analysis

## Sheet: broadtissue_differential_splic.
Gene Set	Description	Size	Expect	Ratio	P Value	FDR
GO:0032501	multicellular organismal process	1816	68.656	1.7333	1.4675e-11	4.7781e-08
GO:0032502	developmental process	1616	61.095	1.7841	3.2039e-11	1.0432e-07
GO:0040011	locomotion	474	17.92	2.7344	5.4607e-11	1.778e-07
GO:0048856	anatomical structure development	1533	57.957	1.7944	8.7302e-11	2.8425e-07
GO:0032879	regulation of localization	411	15.538	2.8317	1.9582e-10	6.376e-07
GO:0030029	actin filament-based process	154	5.8222	4.1222	2.5557e-09	8.3214e-06
GO:0007275	multicellular organism development	1433	54.176	1.7351	7.3797e-09	2.4028e-05
GO:0030036	actin cytoskeleton organization	150	5.6709	4.0558	7.6862e-09	2.5026e-05
GO:0097435	supramolecular fiber organization	140	5.2929	4.1565	1.0359e-08	3.3729e-05
GO:0048518	positive regulation of biological process	1031	38.978	1.8985	1.3622e-08	4.4354e-05
GO:0051128	regulation of cellular component organization	471	17.807	2.471	1.4542e-08	4.7348e-05
GO:0007399	nervous system development	312	11.796	2.8824	1.8015e-08	5.8657e-05
GO:0007010	cytoskeleton organization	357	13.497	2.6673	5.0778e-08	0.00016533
GO:0065008	regulation of biological quality	691	26.124	2.1053	5.3928e-08	0.00017559
GO:0048522	positive regulation of cellular process	811	30.661	1.9569	1.6697e-07	0.00054365
GO:0007015	actin filament organization	70	2.6464	5.2901	2.5435e-07	0.00082816
GO:0007610	behavior	384	14.518	2.4798	3.2042e-07	0.0010433
GO:0032989	cellular component morphogenesis	226	8.5442	3.043	3.3236e-07	0.0010822
GO:0061061	muscle structure development	84	3.1757	4.7233	4.49e-07	0.0014619
GO:0051240	positive regulation of multicellular organismal process	259	9.7918	2.7574	1.4132e-06	0.0046013
GO:0016310	phosphorylation	671	25.368	1.971	1.8124e-06	0.0059011
GO:0051094	positive regulation of developmental process	232	8.771	2.8503	1.9304e-06	0.0062855
GO:0035556	intracellular signal transduction	450	17.013	2.2336	2.0376e-06	0.0066344
GO:0006468	protein phosphorylation	486	18.374	2.177	2.0392e-06	0.0066396
GO:0030154	cell differentiation	696	26.313	1.9382	2.3074e-06	0.0075129
GO:0040012	regulation of locomotion	250	9.4515	2.7509	2.3396e-06	0.0076178
GO:0048869	cellular developmental process	716	27.069	1.921	2.3511e-06	0.0076551
GO:0090066	regulation of anatomical structure size	108	4.0831	3.9186	2.5167e-06	0.0081943
GO:0009653	anatomical structure morphogenesis	527	19.924	2.108	2.5426e-06	0.0082788
GO:0071804	cellular potassium ion transport	84	3.1757	4.4085	2.5925e-06	0.0084412
GO:0071805	potassium ion transmembrane transport	84	3.1757	4.4085	2.5925e-06	0.0084412
GO:0044087	regulation of cellular component biogenesis	148	5.5953	3.3957	2.6559e-06	0.0086478
GO:0010720	positive regulation of cell development	76	2.8733	4.5245	4.4045e-06	0.014341
GO:0048699	generation of neurons	244	9.2247	2.7101	4.8344e-06	0.015741
GO:0032535	regulation of cellular component size	101	3.8184	3.9283	5.0498e-06	0.016442
GO:0051239	regulation of multicellular organismal process	524	19.81	2.0696	5.3954e-06	0.017567
GO:0048731	system development	621	23.478	1.9593	5.9207e-06	0.019278
GO:0050808	synapse organization	78	2.9489	4.4085	5.9415e-06	0.019345
GO:0045597	positive regulation of cell differentiation	90	3.4026	4.1146	6.0194e-06	0.019599
GO:1902903	regulation of supramolecular fiber organization	56	2.1171	5.1957	6.0676e-06	0.019756
GO:0051179	localization	1986	75.083	1.4384	8.6567e-06	0.028186
GO:0030182	neuron differentiation	225	8.5064	2.7038	1.2214e-05	0.039767
GO:0016043	cellular component organization	1697	64.157	1.4807	1.2777e-05	0.041601
GO:0034762	regulation of transmembrane transport	40	1.5122	5.9514	1.3536e-05	0.044072

## Sheet: broadtissue_differential_exp.
Gene Set	Description	Size	Expect	Ratio	P Value	FDR
GO:0032501	multicellular organismal process	1816	504.28	1.3009	0	0
GO:0051716	cellular response to stimulus	1484	412.09	1.5603	0	0
GO:0007154	cell communication	1270	352.67	1.8403	0	0
GO:0023052	signaling	1247	346.28	1.8627	0	0
GO:0007165	signal transduction	1143	317.4	1.8337	0	0
GO:0042221	response to chemical	740	205.49	1.6254	0	0
GO:0048731	system development	621	172.44	1.5889	0	0
GO:0051239	regulation of multicellular organismal process	524	145.51	1.725	0	0
GO:0048583	regulation of response to stimulus	475	131.9	1.6679	0	0
GO:0040011	locomotion	474	131.62	2.0893	0	0
GO:0009605	response to external stimulus	458	127.18	1.8792	0	0
GO:0023051	regulation of signaling	400	111.08	1.7826	0	0
GO:0010646	regulation of cell communication	398	110.52	1.8006	0	0
GO:0007610	behavior	384	106.63	2.1851	0	0
GO:0007399	nervous system development	312	86.639	2.1815	0	0
GO:0007267	cell-cell signaling	289	80.252	2.0436	0	0
GO:0003008	system process	277	76.92	2.3791	0	0
GO:0030030	cell projection organization	266	73.865	2.315	0	0
GO:0007186	G protein-coupled receptor signaling pathway	261	72.477	2.8285	0	0
GO:0120036	plasma membrane bounded cell projection organization	252	69.978	2.3865	0	0
GO:0040012	regulation of locomotion	250	69.422	2.0599	0	0
GO:0022008	neurogenesis	248	68.867	2.1781	0	0
GO:0048699	generation of neurons	244	67.756	2.1843	0	0
GO:0032989	cellular component morphogenesis	226	62.758	2.0874	0	0
GO:0030182	neuron differentiation	225	62.48	2.2247	0	0
GO:0099536	synaptic signaling	212	58.87	2.4121	0	0
GO:0099537	trans-synaptic signaling	211	58.592	2.4065	0	0
GO:0007268	chemical synaptic transmission	210	58.315	2.4179	0	0
GO:0098916	anterograde trans-synaptic signaling	210	58.315	2.4179	0	0
GO:0048666	neuron development	203	56.371	2.1997	0	0
GO:0042330	taxis	186	51.65	2.5363	0	0
GO:0031175	neuron projection development	184	51.095	2.2311	0	0
GO:0050877	nervous system process	181	50.262	2.3676	0	0
GO:0006935	chemotaxis	173	48.04	2.4979	0	0
GO:0032990	cell part morphogenesis	159	44.153	2.129	0	0
GO:0048858	cell projection morphogenesis	155	43.042	2.1839	0	0
GO:0061564	axon development	154	42.764	2.3384	0	0
GO:0048812	neuron projection morphogenesis	153	42.486	2.2125	0	0
GO:0120039	plasma membrane bounded cell projection morphogenesis	153	42.486	2.2125	0	0
GO:0000904	cell morphogenesis involved in differentiation	152	42.209	2.227	0	0
GO:0060271	cilium assembly	56	15.551	3.0224	0	0
GO:0045664	regulation of neuron differentiation	104	28.88	2.3892	2.2204e-16	4.9205e-13
GO:0006937	regulation of muscle contraction	51	14.162	2.9657	6.6613e-16	1.4762e-12
GO:0048869	cellular developmental process	716	198.83	1.4686	1.7764e-15	3.9364e-12
GO:0019098	reproductive behavior	169	46.929	2.003	1.3434e-14	2.9769e-11
GO:0099643	signal release from synapse	51	14.162	2.8244	6.5725e-14	1.4565e-10
GO:1903998	regulation of eating behavior	51	14.162	2.8244	6.5725e-14	1.4565e-10
GO:0007600	sensory perception	65	18.05	2.6039	8.8818e-14	1.9682e-10
GO:0006355	regulation of transcription, DNA-templated	762	211.6	1.4225	9.2371e-14	2.0469e-10
GO:1903506	regulation of nucleic acid-templated transcription	776	215.49	1.4061	4.2477e-13	9.4129e-10
GO:0042493	response to drug	165	45.819	1.9424	7.4984e-13	1.6617e-09
GO:0008037	cell recognition	33	9.1637	3.1646	7.5406e-13	1.671e-09
GO:0009966	regulation of signal transduction	336	93.304	1.6291	1.9598e-12	4.3428e-09
GO:0006811	ion transport	620	172.17	1.4347	7.836e-12	1.7364e-08
GO:0007187	G protein-coupled receptor signaling pathway, coupled to cyclic nucleotide second messenger	46	12.774	2.74	1.2002e-11	2.6597e-08
GO:0050793	regulation of developmental process	474	131.62	1.4815	6.32e-11	1.4005e-07
GO:0010769	regulation of cell morphogenesis involved in differentiation	78	21.66	2.2623	9.1447e-11	2.0265e-07
GO:0032879	regulation of localization	411	114.13	1.5158	9.5251e-11	2.1108e-07
GO:0009612	response to mechanical stimulus	33	9.1637	2.8373	1.5114e-09	3.3492e-06
GO:0050808	synapse organization	78	21.66	2.1699	1.6729e-09	3.707e-06
GO:0007155	cell adhesion	92	25.547	2.0354	5.4372e-09	1.2049e-05
GO:0022610	biological adhesion	92	25.547	2.0354	5.4372e-09	1.2049e-05
GO:0015669	gas transport	17	4.7207	3.3893	1.5086e-08	3.3431e-05
GO:0048489	synaptic vesicle transport	48	13.329	2.4008	2.1134e-08	4.6833e-05
GO:0055001	muscle cell development	44	12.218	2.4553	2.6662e-08	5.9084e-05
GO:0055115	entry into diapause	28	7.7753	2.8295	3.188e-08	7.0646e-05
GO:0034762	regulation of transmembrane transport	40	11.108	2.5208	3.199e-08	7.0891e-05
GO:0045666	positive regulation of neuron differentiation	45	12.496	2.4008	5.8808e-08	0.00013032
GO:0010970	transport along microtubule	43	11.941	2.4287	6.6449e-08	0.00014725
GO:0023056	positive regulation of signaling	155	43.042	1.7193	7.3156e-08	0.00016211
GO:0007617	mating behavior	31	8.6084	2.6718	9.9544e-08	0.00022059
GO:0019933	cAMP-mediated signaling	18	4.9984	3.201	1.0052e-07	0.00022276
GO:0051952	regulation of amine transport	18	4.9984	3.201	1.0052e-07	0.00022276
GO:0033058	directional locomotion	18	4.9984	3.201	1.0052e-07	0.00022276
GO:0071495	cellular response to endogenous stimulus	134	37.21	1.7468	2.1775e-07	0.00048253
GO:0048856	anatomical structure development	1533	425.7	1.1863	3.2399e-07	0.00071795
GO:0010648	negative regulation of cell communication	145	40.265	1.6888	5.7175e-07	0.001267
GO:0051590	positive regulation of neurotransmitter transport	16	4.443	3.151	1.0385e-06	0.0023013
GO:0017156	calcium ion regulated exocytosis	36	9.9968	2.4008	1.2775e-06	0.002831
GO:0071805	potassium ion transmembrane transport	84	23.326	1.8863	1.4612e-06	0.003238
GO:1902680	positive regulation of RNA biosynthetic process	269	74.698	1.4726	1.5858e-06	0.0035141
GO:1901374	acetate ester transport	20	5.5538	2.8809	1.7471e-06	0.0038715
GO:0060079	excitatory postsynaptic potential	20	5.5538	2.8809	1.7471e-06	0.0038715
GO:0052652	cyclic purine nucleotide metabolic process	13	3.61	3.3241	1.9893e-06	0.0044083
GO:0042048	olfactory behavior	46	12.774	2.192	2.5649e-06	0.0056839
GO:0048870	cell motility	170	47.207	1.5887	2.8825e-06	0.0063875
GO:0098662	inorganic cation transmembrane transport	237	65.812	1.4891	3.3104e-06	0.0073359
GO:0000165	MAPK cascade	97	26.936	1.782	4.108e-06	0.0091034
GO:0009581	detection of external stimulus	25	6.9422	2.5928	5.3031e-06	0.011752
GO:1990138	neuron projection extension	57	15.828	2.0217	5.8435e-06	0.012949
GO:0035178	turning behavior	12	3.3323	3.3011	6.6531e-06	0.014743

## Sheet: NervSys_differential_splic.
Gene Set	Description	Size	Expect	Ratio	P Value	FDR
GO:0048856	anatomical structure development	1543	68.112	1.8939	4.4409e-15	1.45e-11
GO:0032502	developmental process	1633	72.085	1.8451	1.0991e-14	3.5886e-11
GO:0007275	multicellular organism development	1441	63.609	1.9022	3.9524e-14	1.2905e-10
GO:0032501	multicellular organismal process	1851	81.708	1.7501	5.0737e-14	1.6566e-10
GO:0048518	positive regulation of biological process	1041	45.952	1.9803	2.4726e-11	8.0732e-08
GO:0048522	positive regulation of cellular process	818	36.108	2.0771	2.6758e-10	8.7364e-07
GO:0051128	regulation of cellular component organization	471	20.791	2.453	1.2822e-09	4.1864e-06
GO:0016043	cellular component organization	1708	75.395	1.6314	1.2943e-09	4.2259e-06
GO:0007010	cytoskeleton organization	361	15.935	2.6984	1.6285e-09	5.3171e-06
GO:0035556	intracellular signal transduction	463	20.438	2.4464	2.0912e-09	6.8277e-06
GO:0048731	system development	622	27.457	2.1853	3.5738e-09	1.1669e-05
GO:0032879	regulation of localization	416	18.363	2.3961	4.07e-08	0.00013288
GO:0040011	locomotion	477	21.056	2.2796	4.4903e-08	0.00014661
GO:0071840	cellular component organization or biogenesis	1832	80.869	1.5333	5.514e-08	0.00018003
GO:0007399	nervous system development	307	13.552	2.6565	5.8477e-08	0.00019093
GO:0030154	cell differentiation	701	30.944	1.9713	1.2589e-07	0.00041103
GO:0045595	regulation of cell differentiation	224	9.8879	2.9329	1.4792e-07	0.00048297
GO:0051239	regulation of multicellular organismal process	529	23.351	2.1412	1.6915e-07	0.00055229
GO:0051641	cellular localization	796	35.137	1.8783	2.1723e-07	0.00070926
GO:0060255	regulation of macromolecule metabolic process	1434	63.3	1.5956	2.7159e-07	0.00088675
GO:0050793	regulation of developmental process	475	20.968	2.1939	2.7799e-07	0.00090763
GO:0019222	regulation of metabolic process	1497	66.081	1.5738	3.3229e-07	0.0010849
GO:0048869	cellular developmental process	722	31.871	1.914	3.6032e-07	0.0011765
GO:2000026	regulation of multicellular organismal development	332	14.655	2.4565	4.2231e-07	0.0013788
GO:0009893	positive regulation of metabolic process	542	23.925	2.0481	8.7547e-07	0.0028584
GO:0010604	positive regulation of macromolecule metabolic process	516	22.777	2.0634	1.2189e-06	0.0039797
GO:0009790	embryo development	474	20.923	2.1029	1.6698e-06	0.0054519
GO:0080090	regulation of primary metabolic process	1268	55.973	1.5901	2.2118e-06	0.0072215
GO:0032103	positive regulation of response to external stimulus	62	2.7368	4.75	2.2452e-06	0.0073307
GO:0048584	positive regulation of response to stimulus	216	9.5348	2.7269	2.7208e-06	0.0088834
GO:0040017	positive regulation of locomotion	116	5.1205	3.5153	2.7805e-06	0.0090785
GO:0051171	regulation of nitrogen compound metabolic process	1251	55.222	1.5755	4.4316e-06	0.014469
GO:0010468	regulation of gene expression	1105	48.777	1.6196	5.0093e-06	0.016355
GO:0031325	positive regulation of cellular metabolic process	494	21.806	2.0178	5.0145e-06	0.016372
GO:0009653	anatomical structure morphogenesis	529	23.351	1.9699	5.7099e-06	0.018643
GO:1903311	regulation of mRNA metabolic process	59	2.6044	4.6076	7.7418e-06	0.025277
GO:0060284	regulation of cell development	149	6.5772	3.0408	7.7465e-06	0.025292
GO:0032101	regulation of response to external stimulus	113	4.9881	3.4081	8.099e-06	0.026443
GO:0048468	cell development	439	19.379	2.0641	8.1639e-06	0.026655
GO:0031323	regulation of cellular metabolic process	1291	56.988	1.5442	8.7528e-06	0.028578
GO:0007154	cell communication	1333	58.842	1.5295	9.8442e-06	0.032141

## Sheet: NervSys_differential_exp.
Gene Set	Description	Size	Expect	Ratio	P Value	FDR
GO:0051716	cellular response to stimulus	1552	490.21	1.432	0	0
GO:0007154	cell communication	1333	421.04	1.6246	0	0
GO:0023052	signaling	1310	413.77	1.6386	0	0
GO:0007165	signal transduction	1203	379.98	1.6133	0	0
GO:0042221	response to chemical	755	238.47	1.497	0	0
GO:0040011	locomotion	477	150.66	1.7058	0	0
GO:0007610	behavior	394	124.45	1.8482	0	0
GO:0007399	nervous system development	307	96.968	1.8666	0	0
GO:0007267	cell-cell signaling	302	95.389	1.7822	0	0
GO:0007186	G protein-coupled receptor signaling pathway	298	94.126	2.3054	0	0
GO:0003008	system process	294	92.862	1.9168	0	0
GO:0030030	cell projection organization	273	86.229	1.9019	0	0
GO:0120036	plasma membrane bounded cell projection organization	259	81.807	1.9314	0	0
GO:0022008	neurogenesis	243	76.753	1.8761	0	0
GO:0048699	generation of neurons	239	75.49	1.881	0	0
GO:0099536	synaptic signaling	224	70.752	2.0211	0	0
GO:0099537	trans-synaptic signaling	223	70.436	2.0302	0	0
GO:0007268	chemical synaptic transmission	222	70.12	2.0393	0	0
GO:0098916	anterograde trans-synaptic signaling	222	70.12	2.0393	0	0
GO:0030182	neuron differentiation	220	69.489	1.8708	0	0
GO:0050877	nervous system process	197	62.224	1.9446	0	0
GO:0042330	taxis	186	58.75	2.1107	0	0
GO:0006935	chemotaxis	171	54.012	2.0921	0	0
GO:0007218	neuropeptide signaling pathway	114	36.008	2.5828	0	0
GO:0051239	regulation of multicellular organismal process	529	167.09	1.5022	2.2204e-15	7.2498e-12
GO:0009605	response to external stimulus	464	146.56	1.5284	7.9936e-15	2.6099e-11
GO:0040012	regulation of locomotion	252	79.596	1.7338	8.8818e-15	2.8999e-11
GO:0048666	neuron development	200	63.172	1.8046	5.107e-14	1.6674e-10
GO:0061564	axon development	153	48.326	1.9244	5.8398e-14	1.9067e-10
GO:0044057	regulation of system process	77	24.321	2.3025	1.1502e-13	3.7554e-10
GO:0031175	neuron projection development	182	57.486	1.8265	1.7875e-13	5.8361e-10
GO:0051960	regulation of nervous system development	130	41.061	1.9727	3.7381e-13	1.2205e-09
GO:0050767	regulation of neurogenesis	110	34.744	2.0435	8.8574e-13	2.8919e-09
GO:0032501	multicellular organismal process	1851	584.65	1.2127	1.075e-12	3.51e-09
GO:0050804	modulation of chemical synaptic transmission	68	21.478	2.3279	1.2113e-12	3.9547e-09
GO:0099177	regulation of trans-synaptic signaling	68	21.478	2.3279	1.2113e-12	3.9547e-09
GO:0120035	regulation of plasma membrane bounded cell projection organization	109	34.428	2.0332	1.8456e-12	6.026e-09
GO:0048667	cell morphogenesis involved in neuron differentiation	146	46.115	1.8866	1.8674e-12	6.097e-09
GO:0007409	axonogenesis	135	42.641	1.923	1.942e-12	6.3406e-09
GO:0000904	cell morphogenesis involved in differentiation	151	47.694	1.866	2.4674e-12	8.0559e-09
GO:0048812	neuron projection morphogenesis	151	47.694	1.866	2.4674e-12	8.0559e-09
GO:0006928	movement of cell or subcellular component	308	97.284	1.5727	1.2184e-11	3.9779e-08
GO:0019098	reproductive behavior	173	54.643	1.7568	4.3064e-11	1.406e-07
GO:0006811	ion transport	663	209.41	1.3562	1.2336e-10	4.0277e-07
GO:0023051	regulation of signaling	409	129.19	1.463	1.4925e-10	4.8731e-07
GO:0060271	cilium assembly	64	20.215	2.2261	1.9789e-10	6.4611e-07
GO:0099643	signal release from synapse	53	16.74	2.3297	3.6705e-10	1.1984e-06
GO:2001141	regulation of RNA biosynthetic process	775	244.79	1.295	4.9419e-09	1.6135e-05
GO:1903506	regulation of nucleic acid-templated transcription	775	244.79	1.295	4.9419e-09	1.6135e-05
GO:0030154	cell differentiation	701	221.42	1.3052	1.0431e-08	3.4058e-05
GO:1903998	regulation of eating behavior	50	15.793	2.2162	2.5422e-08	8.3002e-05
GO:0050770	regulation of axonogenesis	65	20.531	2.0457	4.0181e-08	0.00013119
GO:0007600	sensory perception	74	23.373	1.968	5.3167e-08	0.00017359
GO:0032879	regulation of localization	416	131.4	1.3851	5.787e-08	0.00018895
GO:0071495	cellular response to endogenous stimulus	134	42.325	1.7011	7.1101e-08	0.00023214
GO:0015671	oxygen transport	20	6.3172	2.8494	8.7927e-08	0.00028708
GO:0006937	regulation of muscle contraction	52	16.425	2.131	1.205e-07	0.00039344
GO:0071804	cellular potassium ion transport	92	29.059	1.8239	1.9722e-07	0.00064393
GO:0060560	developmental growth involved in morphogenesis	60	18.951	2.0051	3.8516e-07	0.0012575
GO:0008037	cell recognition	32	10.107	2.3745	5.4217e-07	0.0017702
GO:0045666	positive regulation of neuron differentiation	45	14.214	2.1107	1.3319e-06	0.0043485
GO:0007188	adenylate cyclase-modulating G protein-coupled receptor signaling pathway	35	11.055	2.2614	1.4469e-06	0.0047242
GO:0043053	dauer entry	28	8.844	2.3745	2.8649e-06	0.0093538
GO:0034762	regulation of transmembrane transport	42	13.266	2.1107	3.0165e-06	0.0098489
GO:0097480	establishment of synaptic vesicle localization	50	15.793	1.9629	8.7083e-06	0.028433
