# Supplementary material for: Global regulatory features of alternative splicing across tissues and within the nervous system of C. elegans
Source: Genome Res. 2020 Dec;30(12):1766–80. doi: 10.1101/gr.267328.120 (PMC7706725; doi:10.1101/gr.267328.120)
Supplement: Supplemental Material [file supp_gr.267328.120_Supplemental_Table_S7.xlsx]

## Sheet: Legend
Supplemental Table S7: Spreadsheet with splice junction information marking the positions of alternatively spliced microexons detected in our dataset. Presented in BED format as described for Additional file 2.

## Sheet: all_microexons_junctions
track name=microexons description='all_microexons_junctions'
chrI	77749	78202	microexon	950	+	77749	78202	0	2	50,50	0,403
chrI	77749	79362	microexon	950	+	77749	79362	0	2	50,50	0,1563
chrI	78120	79362	microexon	950	+	78120	79362	0	2	50,50	0,1192
chrX	708914	709941	microexon	950	-	708914	709941	0	2	50,50	0,977
chrX	708914	709885	microexon	950	-	708914	709885	0	2	50,50	0,921
chrX	709791	709941	microexon	950	-	709791	709941	0	2	50,50	0,100
chrIV	749921	750086	microexon	950	+	749921	750086	0	2	50,50	0,115
chrIV	749921	750249	microexon	950	+	749921	750249	0	2	50,50	0,278
chrIV	750010	750249	microexon	950	+	750010	750249	0	2	50,50	0,189
chrIV	1568405	1569520	microexon	950	-	1568405	1569520	0	2	50,50	0,1065
chrIV	1568405	1569087	microexon	950	-	1568405	1569087	0	2	50,50	0,632
chrIV	1569008	1569520	microexon	950	-	1569008	1569520	0	2	50,50	0,462
chrIII	2035084	2036056	microexon	950	-	2035084	2036056	0	2	50,50	0,922
chrIII	2035084	2035705	microexon	950	-	2035084	2035705	0	2	50,50	0,571
chrIII	2035623	2036056	microexon	950	-	2035623	2036056	0	2	50,50	0,383
chrX	2360238	2360479	microexon	950	+	2360238	2360479	0	2	50,50	0,191
chrX	2360238	2360722	microexon	950	+	2360238	2360722	0	2	50,50	0,434
chrX	2360403	2360722	microexon	950	+	2360403	2360722	0	2	50,50	0,269
chrIII	2376959	2377142	microexon	950	+	2376959	2377142	0	2	50,50	0,133
chrIII	2376959	2379647	microexon	950	+	2376959	2379647	0	2	50,50	0,2638
chrIII	2377063	2379647	microexon	950	+	2377063	2379647	0	2	50,50	0,2534
chrI	2614439	2614846	microexon	950	+	2614439	2614846	0	2	50,50	0,357
chrI	2614439	2615126	microexon	950	+	2614439	2615126	0	2	50,50	0,637
chrI	2614769	2615126	microexon	950	+	2614769	2615126	0	2	50,50	0,307
chrX	2910290	2910472	microexon	950	+	2910290	2910472	0	2	50,50	0,132
chrX	2910290	2911160	microexon	950	+	2910290	2911160	0	2	50,50	0,820
chrX	2910393	2911160	microexon	950	+	2910393	2911160	0	2	50,50	0,717
chrII	3017057	3017234	microexon	950	+	3017057	3017234	0	2	50,50	0,127
chrII	3017057	3017397	microexon	950	+	3017057	3017397	0	2	50,50	0,290
chrII	3017153	3017397	microexon	950	+	3017153	3017397	0	2	50,50	0,194
chrX	3122169	3122630	microexon	950	-	3122169	3122630	0	2	50,50	0,411
chrX	3122169	3122562	microexon	950	-	3122169	3122562	0	2	50,50	0,343
chrX	3122477	3122630	microexon	950	-	3122477	3122630	0	2	50,50	0,103
chrI	3731420	3731564	microexon	950	+	3731420	3731564	0	2	50,50	0,94
chrI	3731420	3731789	microexon	950	+	3731420	3731789	0	2	50,50	0,319
chrI	3731487	3731789	microexon	950	+	3731487	3731789	0	2	50,50	0,252
chrX	4058211	4059173	microexon	950	-	4058211	4059173	0	2	50,50	0,912
chrX	4058211	4058861	microexon	950	-	4058211	4058861	0	2	50,50	0,600
chrX	4058783	4059173	microexon	950	-	4058783	4059173	0	2	50,50	0,340
chrX	4390039	4390881	microexon	950	+	4390039	4390881	0	2	50,50	0,792
chrX	4390039	4391088	microexon	950	+	4390039	4391088	0	2	50,50	0,999
chrX	4390799	4391088	microexon	950	+	4390799	4391088	0	2	50,50	0,239
chrII	4609817	4609980	microexon	950	+	4609817	4609980	0	2	50,50	0,113
chrII	4609817	4610093	microexon	950	+	4609817	4610093	0	2	50,50	0,226
chrII	4609904	4610093	microexon	950	+	4609904	4610093	0	2	50,50	0,139
chrII	5090385	5090750	microexon	950	-	5090385	5090750	0	2	50,50	0,315
chrII	5090385	5090611	microexon	950	-	5090385	5090611	0	2	50,50	0,176
chrII	5090535	5090750	microexon	950	-	5090535	5090750	0	2	50,50	0,165
chrII	5378156	5378463	microexon	950	+	5378156	5378463	0	2	50,50	0,257
chrII	5378156	5378891	microexon	950	+	5378156	5378891	0	2	50,50	0,685
chrII	5378390	5378891	microexon	950	+	5378390	5378891	0	2	50,50	0,451
chrI	5407153	5407622	microexon	950	-	5407153	5407622	0	2	50,50	0,419
chrI	5407153	5407529	microexon	950	-	5407153	5407529	0	2	50,50	0,326
chrI	5407453	5407622	microexon	950	-	5407453	5407622	0	2	50,50	0,119
chrV	5466854	5468421	microexon	950	-	5466854	5468421	0	2	50,50	0,1517
chrV	5466854	5468047	microexon	950	-	5466854	5468047	0	2	50,50	0,1143
chrV	5467959	5468421	microexon	950	-	5467959	5468421	0	2	50,50	0,412
chrI	5569149	5569754	microexon	950	-	5569149	5569754	0	2	50,50	0,555
chrI	5569149	5569594	microexon	950	-	5569149	5569594	0	2	50,50	0,395
chrI	5569518	5569754	microexon	950	-	5569518	5569754	0	2	50,50	0,186
chrIII	5612968	5613194	microexon	950	+	5612968	5613194	0	2	50,50	0,176
chrIII	5612968	5613433	microexon	950	+	5612968	5613433	0	2	50,50	0,415
chrIII	5613121	5613433	microexon	950	+	5613121	5613433	0	2	50,50	0,262
chrV	5681625	5682257	microexon	950	-	5681625	5682257	0	2	50,50	0,582
chrV	5681625	5682056	microexon	950	-	5681625	5682056	0	2	50,50	0,381
chrV	5681961	5682257	microexon	950	-	5681961	5682257	0	2	50,50	0,246
chrIII	5968846	5969022	microexon	950	+	5968846	5969022	0	2	50,50	0,126
chrIII	5968846	5969280	microexon	950	+	5968846	5969280	0	2	50,50	0,384
chrIII	5968946	5969280	microexon	950	+	5968946	5969280	0	2	50,50	0,284
chrIV	5979366	5979503	microexon	950	+	5979366	5979503	0	2	50,50	0,87
chrIV	5979365	5979638	microexon	950	+	5979365	5979638	0	2	50,50	0,223
chrIV	5979406	5979641	microexon	950	+	5979406	5979641	0	2	50,50	0,185
chrIV	5981372	5982332	microexon	950	+	5981372	5982332	0	2	50,50	0,910
chrIV	5981372	5982484	microexon	950	+	5981372	5982484	0	2	50,50	0,1062
chrIV	5982250	5982484	microexon	950	+	5982250	5982484	0	2	50,50	0,184
chrV	6141006	6141520	microexon	950	+	6141006	6141520	0	2	50,50	0,464
chrV	6141006	6141758	microexon	950	+	6141006	6141758	0	2	50,50	0,702
chrV	6141444	6141758	microexon	950	+	6141444	6141758	0	2	50,50	0,264
chrIII	6166245	6166568	microexon	950	-	6166245	6166568	0	2	50,50	0,273
chrIII	6166245	6166490	microexon	950	-	6166245	6166490	0	2	50,50	0,195
chrIII	6166414	6166568	microexon	950	-	6166414	6166568	0	2	50,50	0,104
chrV	6216368	6216529	microexon	950	+	6216368	6216529	0	2	50,50	0,111
chrV	6216368	6216838	microexon	950	+	6216368	6216838	0	2	50,50	0,420
chrV	6216444	6216838	microexon	950	+	6216444	6216838	0	2	50,50	0,344
chrII	6586062	6586314	microexon	950	-	6586062	6586314	0	2	50,50	0,202
chrII	6586062	6586211	microexon	950	-	6586062	6586211	0	2	50,50	0,99
chrII	6586120	6586314	microexon	950	-	6586120	6586314	0	2	50,50	0,144
chrV	7010230	7010427	microexon	950	+	7010230	7010427	0	2	50,50	0,147
chrV	7010230	7010555	microexon	950	+	7010230	7010555	0	2	50,50	0,275
chrV	7010351	7010555	microexon	950	+	7010351	7010555	0	2	50,50	0,154
chrII	7049776	7050020	microexon	950	-	7049776	7050020	0	2	50,50	0,194
chrII	7049776	7049935	microexon	950	-	7049776	7049935	0	2	50,50	0,109
chrII	7049862	7050020	microexon	950	-	7049862	7050020	0	2	50,50	0,108
chrI	7444101	7445061	microexon	950	+	7444101	7445061	0	2	50,50	0,910
chrI	7444101	7445426	microexon	950	+	7444101	7445426	0	2	50,50	0,1275
chrI	7444970	7445426	microexon	950	+	7444970	7445426	0	2	50,50	0,406
chrX	7693072	7693727	microexon	950	-	7693072	7693727	0	2	50,50	0,605
chrX	7693072	7693602	microexon	950	-	7693072	7693602	0	2	50,50	0,480
chrX	7693529	7693727	microexon	950	-	7693529	7693727	0	2	50,50	0,148
chrII	7750847	7751122	microexon	950	+	7750847	7751122	0	2	50,50	0,225
chrII	7750847	7751336	microexon	950	+	7750847	7751336	0	2	50,50	0,439
chrII	7751046	7751336	microexon	950	+	7751046	7751336	0	2	50,50	0,240
chrI	8014582	8014875	microexon	950	+	8014582	8014875	0	2	50,50	0,243
chrI	8014582	8014952	microexon	950	+	8014582	8014952	0	2	50,50	0,320
chrI	8014788	8014952	microexon	950	+	8014788	8014952	0	2	50,50	0,114
chrI	8092231	8092441	microexon	950	+	8092231	8092441	0	2	50,50	0,160
chrI	8092231	8093386	microexon	950	+	8092231	8093386	0	2	50,50	0,1105
chrI	8092365	8093386	microexon	950	+	8092365	8093386	0	2	50,50	0,971
chrX	8389692	8390999	microexon	950	-	8389692	8390999	0	2	50,50	0,1257
chrX	8389692	8390648	microexon	950	-	8389692	8390648	0	2	50,50	0,906
chrX	8390572	8390999	microexon	950	-	8390572	8390999	0	2	50,50	0,377
chrI	8940227	8940873	microexon	950	-	8940227	8940873	0	2	50,50	0,596
chrI	8940227	8940611	microexon	950	-	8940227	8940611	0	2	50,50	0,334
chrI	8940517	8940873	microexon	950	-	8940517	8940873	0	2	50,50	0,306
chrIII	9396649	9396980	microexon	950	+	9396649	9396980	0	2	50,50	0,281
chrIII	9396649	9397909	microexon	950	+	9396649	9397909	0	2	50,50	0,1210
chrIII	9396898	9397909	microexon	950	+	9396898	9397909	0	2	50,50	0,961
chrII	9767458	9767643	microexon	950	+	9767458	9767643	0	2	50,50	0,135
chrII	9767458	9767773	microexon	950	+	9767458	9767773	0	2	50,50	0,265
chrII	9767563	9767773	microexon	950	+	9767563	9767773	0	2	50,50	0,160
chrIII	9855533	9856140	microexon	950	-	9855533	9856140	0	2	50,50	0,557
chrIII	9855533	9855986	microexon	950	-	9855533	9855986	0	2	50,50	0,403
chrIII	9855913	9856140	microexon	950	-	9855913	9856140	0	2	50,50	0,177
chrX	10101544	10101709	microexon	950	+	10101544	10101709	0	2	50,50	0,115
chrX	10101544	10101892	microexon	950	+	10101544	10101892	0	2	50,50	0,298
chrX	10101636	10101892	microexon	950	+	10101636	10101892	0	2	50,50	0,206
chrII	10460477	10460690	microexon	950	+	10460477	10460690	0	2	50,50	0,163
chrII	10460477	10460918	microexon	950	+	10460477	10460918	0	2	50,50	0,391
chrII	10460617	10460918	microexon	950	+	10460617	10460918	0	2	50,50	0,251
chrV	10643644	10643832	microexon	950	+	10643644	10643832	0	2	50,50	0,138
chrV	10643644	10644010	microexon	950	+	10643644	10644010	0	2	50,50	0,316
chrV	10643759	10644010	microexon	950	+	10643759	10644010	0	2	50,50	0,201
chrX	10800790	10801204	microexon	950	-	10800790	10801204	0	2	50,50	0,364
chrX	10800790	10801111	microexon	950	-	10800790	10801111	0	2	50,50	0,271
chrX	10801038	10801204	microexon	950	-	10801038	10801204	0	2	50,50	0,116
chrIV	10930187	10930681	microexon	950	-	10930187	10930681	0	2	50,50	0,444
chrIV	10930187	10930445	microexon	950	-	10930187	10930445	0	2	50,50	0,208
chrIV	10930372	10930681	microexon	950	-	10930372	10930681	0	2	50,50	0,259
chrV	10992938	10993235	microexon	950	+	10992938	10993235	0	2	50,50	0,247
chrV	10992938	10993404	microexon	950	+	10992938	10993404	0	2	50,50	0,416
chrV	10993162	10993404	microexon	950	+	10993162	10993404	0	2	50,50	0,192
chrIII	11023542	11023700	microexon	950	+	11023542	11023700	0	2	50,50	0,108
chrIII	11023542	11023806	microexon	950	+	11023542	11023806	0	2	50,50	0,214
chrIII	11023626	11023806	microexon	950	+	11023626	11023806	0	2	50,50	0,130
chrII	11060014	11060312	microexon	950	-	11060014	11060312	0	2	50,50	0,248
chrII	11060014	11060246	microexon	950	-	11060014	11060246	0	2	50,50	0,182
chrII	11060167	11060312	microexon	950	-	11060167	11060312	0	2	50,50	0,95
chrX	11074577	11074748	microexon	950	+	11074577	11074748	0	2	50,50	0,121
chrX	11074577	11075088	microexon	950	+	11074577	11075088	0	2	50,50	0,461
chrX	11074651	11075088	microexon	950	+	11074651	11075088	0	2	50,50	0,387
chrI	11146497	11146950	microexon	950	+	11146497	11146950	0	2	50,50	0,403
chrI	11146497	11147757	microexon	950	+	11146497	11147757	0	2	50,50	0,1210
chrI	11146876	11147757	microexon	950	+	11146876	11147757	0	2	50,50	0,831
chrIV	11293651	11293827	microexon	950	+	11293651	11293827	0	2	50,50	0,126
chrIV	11293651	11294311	microexon	950	+	11293651	11294311	0	2	50,50	0,610
chrIV	11293753	11294311	microexon	950	+	11293753	11294311	0	2	50,50	0,508
chrIII	11423031	11423237	microexon	950	+	11423031	11423237	0	2	50,50	0,156
chrIII	11423031	11423490	microexon	950	+	11423031	11423490	0	2	50,50	0,409
chrIII	11423162	11423490	microexon	950	+	11423162	11423490	0	2	50,50	0,278
chrIV	11993045	11993522	microexon	950	-	11993045	11993522	0	2	50,50	0,427
chrIV	11993045	11993389	microexon	950	-	11993045	11993389	0	2	50,50	0,294
chrIV	11993316	11993522	microexon	950	-	11993316	11993522	0	2	50,50	0,156
chrV	12132970	12133123	microexon	950	+	12132970	12133123	0	2	50,50	0,103
chrV	12132970	12133537	microexon	950	+	12132970	12133537	0	2	50,50	0,517
chrV	12133032	12133537	microexon	950	+	12133032	12133537	0	2	50,50	0,455
chrIII	12481626	12481777	microexon	950	+	12481626	12481777	0	2	50,50	0,101
chrIII	12481626	12482839	microexon	950	+	12481626	12482839	0	2	50,50	0,1163
chrIII	12481704	12482839	microexon	950	+	12481704	12482839	0	2	50,50	0,1085
chrV	12498886	12499049	microexon	950	+	12498886	12499049	0	2	50,50	0,113
chrV	12498886	12499303	microexon	950	+	12498886	12499303	0	2	50,50	0,367
chrV	12498971	12499303	microexon	950	+	12498971	12499303	0	2	50,50	0,282
chrIV	12783776	12784112	microexon	950	+	12783776	12784112	0	2	50,50	0,286
chrIV	12783776	12784734	microexon	950	+	12783776	12784734	0	2	50,50	0,908
chrIV	12784024	12784734	microexon	950	+	12784024	12784734	0	2	50,50	0,660
chrV	12912479	12912622	microexon	950	+	12912479	12912622	0	2	50,50	0,93
chrV	12912479	12912888	microexon	950	+	12912479	12912888	0	2	50,50	0,359
chrV	12912549	12912888	microexon	950	+	12912549	12912888	0	2	50,50	0,289
chrIV	13265933	13267188	microexon	950	-	13265933	13267188	0	2	50,50	0,1205
chrIV	13265933	13266177	microexon	950	-	13265933	13266177	0	2	50,50	0,194
chrIV	13266095	13267188	microexon	950	-	13266095	13267188	0	2	50,50	0,1043
chrIV	14503674	14505081	microexon	950	-	14503674	14505081	0	2	50,50	0,1357
chrIV	14503674	14504062	microexon	950	-	14503674	14504062	0	2	50,50	0,338
chrIV	14503986	14505081	microexon	950	-	14503986	14505081	0	2	50,50	0,1045
chrI	14567447	14570102	microexon	950	-	14567447	14570102	0	2	50,50	0,2605
chrI	14567447	14569966	microexon	950	-	14567447	14569966	0	2	50,50	0,2469
chrI	14569890	14570102	microexon	950	-	14569890	14570102	0	2	50,50	0,162
chrI	14832082	14834747	microexon	950	-	14832082	14834747	0	2	50,50	0,2615
chrI	14832082	14832890	microexon	950	-	14832082	14832890	0	2	50,50	0,758
chrI	14832817	14834747	microexon	950	-	14832817	14834747	0	2	50,50	0,1880
chrV	16025551	16026212	microexon	950	+	16025551	16026212	0	2	50,50	0,611
chrV	16025551	16026523	microexon	950	+	16025551	16026523	0	2	50,50	0,922
chrV	16026139	16026523	microexon	950	+	16026139	16026523	0	2	50,50	0,334
chrX	16125685	16126135	microexon	950	-	16125685	16126135	0	2	50,50	0,400
chrX	16125685	16126048	microexon	950	-	16125685	16126048	0	2	50,50	0,313
chrX	16125954	16126135	microexon	950	-	16125954	16126135	0	2	50,50	0,131
chrIV	17271022	17271163	microexon	950	+	17271022	17271163	0	2	50,50	0,91
chrIV	17271022	17271318	microexon	950	+	17271022	17271318	0	2	50,50	0,246
chrIV	17271084	17271318	microexon	950	+	17271084	17271318	0	2	50,50	0,184
chrV	20891288	20891468	microexon	950	+	20891288	20891468	0	2	50,50	0,130
chrV	20891288	20891767	microexon	950	+	20891288	20891767	0	2	50,50	0,429
chrV	20891395	20891767	microexon	950	+	20891395	20891767	0	2	50,50	0,322
