# Supplementary material for: Global regulatory features of alternative splicing across tissues and within the nervous system of C. elegans
Source: Genome Res. 2020 Dec;30(12):1766–80. doi: 10.1101/gr.267328.120 (PMC7706725; doi:10.1101/gr.267328.120)
Supplement: Supplemental Material [file supp_gr.267328.120_Supplemental_Table_S8.xlsx]

## Sheet: Legend
Supplemental Table S8: List of plasmids and C. elegans strains constructed and used in this study.

## Sheet: plasmids and strains
plasmid ID	Plasmid alias	Description
pWASR2	Prgef::unc-32_two_colour_reporter	two-colour splicing reporter backbone (with rgef-1 promoter inserted and unc-32 exon 4 cluster minigene). Used for cloning new splicing reporters
p-PP1	Pmyo::ampd-1	ampd-1 splicing reporter under control of myo-3 promoter (for expression in muscle cells)
p-PP2	Prgef::ampd-1	ampd-1 splicing reporter under control of rgef-1 promoter (for expression in neuronal cells)
p-PP3	Pmyo::fhod1	fhod-1 splicing reporter under control of myo-3 promoter (for expression in muscle cells)
p-PP4	Pges::fhod1	fhod-1 splicing reporter under control of ges-1 promoter (for expression in intestinal cells)
p-PP5	Pmyo::hlb1	hlb-1 splicing reporter under control of myo-3 promoter (for expression in muscle cells)
p-PP6	Prgef::hlb1	hlb-1 splicing reporter under control of rgef-1 promoter (for expression in neuronal cells)
p-PP7	Pmyo::zoo1	zoo-1 splicing reporter under control of myo-3 promoter (for expression in muscle cells)
p-PP8	Prgef::zoo1	zoo-1 splicing reporter under control of rgef-1 promoter (for expression in neuronal cells)
p-PP98	Pmyo::zoo-1 156,157	zoo-1 splicing reporter expressed in neurons containing UNC-75 site1 cis element mutations
p-PP99	Pmyo::zoo-1 158,159	zoo-1 splicing reporter expressed in neurons containing UNC-75 site2 cis element mutations
p-PP100	Pmyo::zoo-1 160,161	zoo-1 splicing reporter expressed in neurons containing UNC-75 site1 & site2 cis element mutations
pBS64	Pdat::adr-1	adr-1 splicing reporter expressed under control of dat-1 promoter (for expression in dopaminergic neurons)
pBS67	Ptph::adr-1	adr-1 splicing reporter expressed under control of tph-1 promoter (for expression in serotonergic neurons)
pBS98	Prgef::mlk-1	mlk-1 splicing reporter under control of rgef-1 promoter (for expression in neuronal cells)
C. elegans strain ID	Genotype	Description
JAC908	smg -1(r861) I; csbIs31 [Prgef-1::zoo-1 exon 9 splicing reporter + Pmyo-3::zoo-1 exon 9 splicing reporter]	zoo-1 splicing reporter expressed in neuronal and muscle cells. NMD-deficient smg-1 background used to enhance GFP signal (Figure 7B)
JAC909	smg-1(r861) I; csbIs23 [Prgef-1::hlb-1 exon 12 splicing reporter + Pmyo-3::hlb-1 exon 12 splicing reporter]	hlb-1 splicing reporter expressed in neuronal and muscle cells. NMD-deficient smg-1 background used to enhance GFP signal (Figure 2)
JAC913	smg-1(r861) I; csbIs25 [Pges-1::fhod-1 exon 9 splicing reporter + Pmyo-3::fhod-1 exon 9 splicing reporter]	fhod-1 splicing reporter expressed in intestinal and muscle cells. NMD-deficient smg-1 background used to enhance GFP signal (Figure 2)
JAC915	smg-1(r861) I; csbIs34 [Pdat-1::adr-1 exon 7 splicing reporter + Ptph-1::adr-1 exon 7 splicing reporter]	adr-1 splicing reporter expressed in serotonergic and dopaminergic neuronal cells. NMD-deficient smg-1 background used to enhance GFP signal (Figure 2)
JAC916	smg-1(r861) I; csbIs35 [Prgef-1::mlk-1 exon 11 splicing reporter]	mlk-1 splicing reporter expressed in neuronal cells. NMD-deficient smg-1 background used to enhance GFP signal (Figure S2)
JAC917	smg-1(r861) I; csbEx203 [Prgef-1::ampd-1 exon 15 splicing reporter + Pmyo-3::ampd-1 exon 15 splicing reporter]	ampd-1 splicing reporter expressed in neuronal and muscle cells. NMD-deficient smg-1 background used to enhance GFP signal (Figure S2)
JAC929	smg-1(r861) I; csbEx204 [Prgef-1::zoo-1 exon 9 splicing reporter]	zoo-1 wild-type splicing reporter expressed in neuronal cells. NMD-deficient smg-1 background used to enhance GFP signal (Figure 7F)
JAC930	smg-1(r861) I; csbEx205 [Prgef-1::zoo-1 exon 9 unc-75 site 1 mutant splicing reporter]	zoo-1 unc-75 cis element site 1 mutant splicing reporter expressed in neuronal cells. NMD-deficient smg-1 background used to enhance GFP signal (Figure 7F)
JAC931	smg-1(r861) I; csbEx206 [Prgef-1::zoo-1 exon 9 unc-75 site 2 mutant splicing reporter]	zoo-1 unc-75 cis element site 2 mutant splicing reporter expressed in neuronal cells. NMD-deficient smg-1 background used to enhance GFP signal (Figure 7F)
JAC932	smg-1(r861) I; csbEx207 [Prgef-1::zoo-1 exon 9 unc-75 site 1&2 mutant splicing reporter]	zoo-1 unc-75 cis element site 1&2 mutant splicing reporter expressed in neuronal cells. NMD-deficient smg-1 background used to enhance GFP signal (Figure 7F)
JAC729	csbIs23 [Pmyo-3::hlb-1 exon 12 splicing reporter + Prgef::hlb-1 exon 12 splicing reporter]	hlb-1 splicing reporter expressed in neuronal and muscle cells. Wild-type genetic background with reduced overall GFP signal (Figure S8)
JAC803	csbIs31 [Pmyo-3::zoo-1 exon 9 splicing reporter + Prgef::zoo-1 exon 9 splicing reporter]	zoo-1 splicing reporter expressed in neuronal and muscle cells. Wild-type genetic background with reduced overall GFP signal (Figure S8)
JAC734	csbIs24 [Pmyo-3::ampd-1 exon 15 splicing reporter + Prgef::ampd-1 exon 15 splicing reporter]	ampd-1 splicing reporter expressed in neuronal and muscle cells. Wild-type genetic background with reduced overall GFP signal (Figure S8)
JAC126	csbIs4 [Prgef-1::eGFP (+ intron)::rpl-1 (spliced)::unc-54 3' UTR + lin-15]	TRAP strain used to enrich for neuronal mRNA
JAC127	csbIs6 [Pmyo-3::eGFP (+ intron)::rpl-1 (spliced)::unc-54 3' UTR + lin-15]	TRAP strain used to enrich for muscle mRNA
JAC379	csbIs27 [Pdat-1::eGFP (+ intron)::rpl-1 (spliced)::unc-54 3' UTR + lin-15]	TRAP strain used to enrich for dopaminergic neuronal mRNA
JAC382	csbIs29 [Pges-1::eGFP (+ intron)::rpl-1(spliced)::unc-54 3' UTR + lin-15]	TRAP strain used to enrich for intestinal mRNA
JAC433	csbIs32 [Ptph-1::eGFP (+ intron)::rpl-1 (spliced)::unc-54 3' UTR + lin-15]	TRAP strain used to enrich for serotonergic neuronal mRNA
