# Supplementary material for: Global regulatory features of alternative splicing across tissues and within the nervous system of C. elegans
Source: Genome Res. 2020 Dec;30(12):1766–80. doi: 10.1101/gr.267328.120 (PMC7706725; doi:10.1101/gr.267328.120)
Supplement: Supplemental Material [file supp_gr.267328.120_Supplemental_Table_S9.xlsx]

## Sheet: Legend
Supplemental Table S9: List of primers used in this study

## Sheet: Primers
Primer ID	Description	Sequence
oPP1	zoo-1 F	TCTCAACAATTTTTAGCCGGTACCaccATGAAACTTGCTGAAAACGGAAACCAAA
oPP2	zoo-1 R	CTCTGTCGGTTGGACTCGTTCCTCA
oPP7	hlb-1 F	TCTCAACAATTTTTAGCCGGTACCaccATGTATTGCTCACCATCACCTCCGG
oPP8	hlb-1 R	CTAGATTCGGCGCACTGACTGC
oPP11	fhod-1 F	TCTCAACAATTTTTAGCCGGTACCaccATGGACACGTACTACGACGCAGTAGATACACTA
oPP12	fhod-1 R	CTCGTTTTCTCTgGTTTCTCTGCCT
oPP15	C34F11.3 F	TCTCAACAATTTTTAGCCGGTACCaccATGGATGCTGTTGATGTGAACTACCAACGGATG
oPP16	C34F11.3 R	CACGCTGGGCGGGATGGAATAGAAC
oPP17	C34F11.3 gblock	CCCAAGTTCTATTCCATcCCGCCCAGCGTGCCGGATTTGGAGGGTAAGAGTTTTTTGAGTGTGATGATCCGAAATTTAATGTTTTGGTTTTTTACATCTCCTGTCTAAACCGATAACAGTTACTCTCAATAAGACTAGATTACCAAACAACAACAACAACCTACAGTCATCCATCGAGTGATTCAAATATTGTCTACTAATAGTTGTTTTCCTTTTACATTCAAACAGCGTTTCTGATTTTTGTTTGGTTTCTCACTCTTTATGTCCTTTTGACATCTTCTACTTCTACCAATTATAATATCATGTTGTGTCAAATAGAAACTGATTCTTCTAGTTTTACCAGACTAATTTTCAGCCGTCCAGACATCATTCAATCCACCAGATCCGCCAAAGGATCAT…
oPP18	fhod-1 gblock	AGAGGAGGCAGAGAAACcAGAGAAAACGAGAGGAACGAGAAGTCAGGTTGGATTTGAACTGTTTTTTTTATTTGGCATGGTATGATTACTGTAGAGCATGATGGTGGTGGTGTGACGTAAACTATGTATCAGTAGACCTTGAGCAAACCCCTAATTGTAAAGTTAAATTCAGATTCTCAAAGAACGATATTTCTCCAACAACATCTTCTGGAGTAGCAGATcGACAAGAAGGCGACGAcGAGGCGACGACATcGATGAAGCACGCCGTCGGCAATTGGAACATGAACAATTCACAGCGAATAGGACGTTGTcAACAAAATGCGGCCGCAGTAAGTTTAAACATATATATA
oPP20	hlb-1 gblock	GGAAGCGCGCAGTCAGTGCGCCGAATCTAGGTAGAGAGATTGAATGTCTGAATGATATTGCACCATATTCTGTTTGATGTGTGCCAATTTCTAACATTCATTCTTTTTTACAGAAACCATCTTATTCTTAACTATCCAGAAGCAAAACATTGTTGAGCACCAGGCTCTTAACAAAAATTATTATTTGATTTGAGTTTTGAATCTTTGCGTTTGTTGACTGACTCCCGCGCCAGCACACTAACTAATCTGGCATAATTAATACAACTGAACATTGAGTTTGTTATACAGTGTAATGGTCCTCATTTGTCCTTGGTAACATTTTTCTTGTATTTTCGTCTTGGTGTAGAAGAAAGGAATTGGTTTTTTGTAGGCAGAAGGTTTCCGATGGAAACTTTAGTG…
oPP23	zoo-1 gblock	CTTCGTGAGGAACGAGTcCAACCGACAGAGATCCGAGGTGTTGTGTTGTGCTTTGATTGTAGAATTTTCAAAAAGCTGGAGCTTAGACTCAGGCTTGGGCTTAGGCTTAGGCTTAAGCTTATGCTTTGGCTTAGGCTTGGCGTCAGAGGCGAGCGTTAGCTCGCCACTGATTAATCATCGGAATTGGACATCATCAGAGTGATTATATTCATCAAAGGTCCCACTTTACTGGAGGGTTAATTTGATCGATATAAAATTCCTATCTCATGTAAAGAAAGGTTCGAATTCTGTACCTATGAATGCTGCCGATATTTGAATTCCTGTCTCATGGGAAGAAGGCCTTTCTTGTGGAAAGAACGGAGTTATAAAAAATATACGCAGGTACAGAATTTGAACTTT…
oPP156	FwdZoo1Unc75Site1	GACAGAGATCCGAGGTGccGTGTTGTGCTTTGATTGTAGAATTTT
oPP157	RevZoo1Unc75Site1	AAAATTCTACAATCAAAGCACAACACggCACCTCGGATCTCTGTC
oPP158	FwdZoo1Unc75Site2	GACAGAGATCCGAGGTGTTGTGccGTGCTTTGATTGTAGAATTTT
oPP159	RevZoo1Unc75Site2	AAAATTCTACAATCAAAGCACggCACAACACCTCGGATCTCTGTC
oPP160	FwdZoo1Unc75Site1+2	GACAGAGATCCGAGGTGccGTGccGTGCTTTGATTGTAGAATTTT
oPP161	RevZoo1Unc75Site1+2	AAAATTCTACAATCAAAGCACggCACggCACCTCGGATCTCTGTC
oBS82	adr-1 F	TCTCAACAATTTTTAGCCGGTACCACCATGGCTGATGCTATTTCAAATCAACC
oBS83	adr-1 R	TGTCAACTGGGAGCTTGAGA
oBS84	adr-1 gblock	ACTTATAAATTCTCAAGCTCCCAGTTGACACCTGTCGAATCTGCGCTTTCGTTGCTAGATCTAATGCAAAAAATAATTGCCGAGTCTGCCGAGAAGTATTCACCAGTTTTCGAAGCTTCGGAGGTTCCAAAAGATCCAGAGATTCCCGAAGTCGAAGTCAAAAAAGAAGAAGTGGATACAAATGGAGAAAACGTTGCCAACGAAAAGAAGAGTGGTTGGCGCAAAAACGAGACCATGCACAATGTCACTTTGAAATTCGTGGAGCAAAACAAACAATATACAAAGATGGGACCAAGTCGTGGAGTTTTGAAAGATATGGTCATTCGCGAAGCTCTTCGCGACTTGTTCAACGTGTCACATGCCGACATCACCACTGTTGCCCGCAGACATGCAAGCAAT…
oBS177	mlk-1 F	GCATCGACGACGACGACGGGTACCACCATGGAGGAATTCGAGAAACGATTCC
oBS178	mlk-1 R	CATTTGTTGGCGAGACAAC
oBS176	mlk-1 gblock	GGATGTTCGAGTCACCGGTTGTCTCGCCAACAAATGGACGACTCCAACACTTTTTCAACAAGTAGGCGTTGTGATTGTGAATGTGATGTTAATAGCACTAGTGCTCATTGTTAATCAGTGTTTTCGACTCAAAAATATCCTATGTTAATATTAATCCAATAAACTTTCAGTCGACAATGCCGACGAGGTAGACCCAAATCATTCGAAAGAATCCAAAAAAGGAGGAACATTATCAAGAGCCTGGGCCAAACTACCATGGAACAAGCGAGACTCAAAAGAGGATCACGACGAAAGAGCAGTGGCTGGGAGCATATCAAGCAGATCCAGTTCAACTACTTCCAGCAACAGGCTGATTACCGGGCAAACAACAAGAGGAGCTTCTGCCGCCGGATTGCTGGA…
